# Supplementary material for: Social networks predict gut microbiome composition in wild baboons
Source: eLife. 2015 Mar 16;4:e05224. doi: 10.7554/eLife.05224 (PMC4379495; doi:10.7554/eLife.05224)
Supplement: Supplementary file 1. — Table listing all subject and sample characteristics. DOI: http://dx.doi.org/10.7554/eLife.05224.014 [file elife05224s001.xlsx]

## Sheet: Sheet1
Subject ID	Social group	Sex	Age	Fecal sample collection Date	Number of paired-end sequences
F01	Viola's	female	4.82	2012-07-07	9656069
F02	Viola's	female	8.26	2012-07-07	21109752
F03	Viola's	female	6.4	2012-07-24	9287963
F04	Viola's	female	9.3	2012-08-04	9350256
F05	Viola's	female	6.4	2012-07-07	13170954
F06	Viola's	female	12.16	2012-08-07	22221645
F07	Mica's	female	10.74	2012-07-27	9577298
F08	Mica's	female	5.19	2012-08-06	9053772
F09	Mica's	female	4.82	2012-08-02	8057906
F10	Mica's	female	7.99	2012-07-18	7036522
F11	Mica's	female	13.94	2012-07-27	5886174
F12	Mica's	female	6.57	2012-08-02	7016400
F13	Mica's	female	9.55	2012-07-27	8461607
F14	Viola's	female	11.09	2012-07-28	7079126
F15	Viola's	female	5.88	2012-08-03	7561558
F16	Viola's	female	9.79	2012-07-17	6385191
F17	Viola's	female	14.24	2012-07-17	16692755
F18	Viola's	female	10.77	2012-07-07	10197627
F19	Viola's	female	19.56	2012-08-04	11473908
F20	Viola's	female	13.93	2012-07-24	8690335
F21	Viola's	female	14.11	2012-08-08	12193900
F22	Viola's	female	22.44	2012-07-19	8757699
F23	Viola's	female	15.48	2012-08-01	10639484
F24	Viola's	female	15.33	2012-07-28	9900654
F25	Viola's	female	6.01	2012-07-17	11737044
F26	Mica's	female	20.5	2012-07-12	9710157
F27	Mica's	female	6.78	2012-07-10	15211114
F28	Mica's	female	4.86	2012-07-26	4565362
F29	Mica's	female	10.38	2012-07-30	30610918
F30	Viola's	female	11.81	2012-07-19	7024311
F31	Viola's	female	6.97	2012-07-24	78112768
M01	Mica's	male	10.1	2012-08-06	22060923
M02	Mica's	male	11.66	2012-08-06	51296086
M03	Mica's	male	13.27	2012-07-27	14057471
M04	Mica's	male	8.69	2012-08-06	15836164
M05	Mica's	male	12.85	2012-08-06	46801714
M06	Viola's	male	13.79	2012-07-12	11722332
M07	Viola's	male	17.61	2012-07-17	10395900
M08	Mica's	male	14.78	2012-07-10	5531414
M09	Viola's	male	10.61	2012-07-19	7741234
M10	Viola's	male	13.33	2012-07-19	5401225
M11	Viola's	male	9.14	2012-08-04	9173371
M12	Mica's	male	19	2012-07-27	4923087
M13	Viola's	male	14.96	2012-07-12	7798067
M14	Mica's	male	15.56	2012-07-12	11608000
M15	Viola's	male	7.51	2012-08-08	9549617
M16	Viola's	male	7.95	2012-08-08	40099413
M17	Viola's	male	12.57	2012-07-19	8412741
