# Supplementary material for: Social networks predict gut microbiome composition in wild baboons
Source: eLife. 2015 Mar 16;4:e05224. doi: 10.7554/eLife.05224 (PMC4379495; doi:10.7554/eLife.05224)
Supplement: Supplementary file 2. — Table listing the relative abundance of microbial species in each sample inferred via MetaPhlAn 2.0. DOI: http://dx.doi.org/10.7554/eLife.05224.015 [file elife05224s002.xlsx]

## Sheet: Supplementary file 2
Species	F01	F02	F03	F04	F05	F06	F07	F08	F09	F10	F11	F12	F13	F14	F15	F16	F17	F18	F19	F20	F21	F22	F23	F24	F25	F26	F27	F28	F29	F30	F31	M01	M02	M03	M04	M05	M06	M07	M08	M09	M10	M11	M12	M13	M14	M15	M16	M17
Crenarchaeota_noname_unclassified	0.0102507	0.006841	0.0409888	0.0148423	0.0307937	0.0178582	0	0.0287166	0	0.0606646	0	0.0350046	0	0	0.0353085	0.0888624	0.0570854	0.0268334	0.0361144	0.0319137	0.00888303	0.0575397	0.0502025	0.0598421	0.0466709	0.00860827	0.00413841	0	0.00404102	0.0125269	0.0243346	0.0156579	0.0303137	0	0.03401	0.0262956	0.0139228	0.0169441	0	0.0565666	0.0377929	0.0300344	0	0.0378528	0.0166409	0	0.0609852	0.0270571
Staphylothermus_unclassified	0	0	0	0	0	0	0	0	0	0	0	0	0	0	0	0	0	0	0	0	0	0	0	0	0.00360733	0	0	0	0	0	0.00155238	0.000884033	0	0	0.00256143	0	0	0	0	0	0	0	0	0	0	0	0.00257115	0
Sulfolobus_islandicus	0	0	0	0	0	0	0	0	0	0	0	0	0	0	0	0	0	0	0	0	0	0	0	0	0	0	0	0	0	0	0.00140553	0.000659279	0	0	0.00444297	0	0	0	0	0	0	0	0	0	0	0	0.00567354	0
Sulfolobus_solfataricus	0	0	0	0	0	0	0	0	0	0	0	0	0	0	0	0	0	0	0	0	0	0	0	0	0	0	0	0	0	0	0	0	0	0	0	0	0	0	0	0	0	0	0	0	0	0	0.00520606	0
Archaeoglobus_unclassified	0	0.00402845	0	0	0	0	0	0	0	0	0	0	0	0	0	0	0	0	0	0	0	0	0	0	0	0	0	0	0	0	0.00253835	0.00241236	0	0	0.0138349	0	0.0114843	0	0	0.0200927	0	0	0	0	0.0130116	0	0.0177431	0
Aciduliprofundum_boonei	0	0	0	0	0	0	0	0	0	0	0	0	0	0	0	0	0	0	0	0	0	0	0	0	0	0	0	0	0	0	0.000923037	0.00113875	0.00112078	0	0.00346267	0	0	0	0	0	0	0	0	0	0	0	0.00637476	0
Euryarchaeota_noname_unclassified	0.0504848	0	0	0	0	0	0	0	0	0	0	0	0	0	0	0	0	0	0	0	0	0	0	0	0	0	0	0	0.0222105	0	0	0	0	0.0178531	0.0109098	0	0	0	0	0	0	0.0637952	0	0	0	0	0.0158094	0
Haladaptatus_paucihalophilus	0	0	0	0	0	0	0	0	0	0	0	0	0	0	0	0	0	0	0	0	0	0	0	0	0	0	0	0	0	0	0.000461518	0.00131856	0	0	0	0	0	0	0	0	0	0	0	0	0	0	0	0
Halalkalicoccus_jeotgali	0	0	0	0	0	0	0	0	0	0	0	0	0	0	0	0	0	0	0	0	0	0	0	0	0	0	0	0	0	0	0	0.00146839	0	0	0.00124909	0	0	0	0	0	0	0	0	0	0	0	0.00582228	0
Halarchaeum_acidiphilum	0	0.0067059	0	0	0	0	0	0	0	0	0	0	0	0	0	0	0	0	0	0	0	0	0	0	0	0	0	0	0.00262365	0	0.00371313	0.0025622	0	0	0.000648262	0	0	0	0	0	0	0	0	0	0	0	0.00441984	0
Haloarcula_unclassified	0	0	0	0	0	0	0	0	0	0	0	0	0	0	0	0	0	0	0	0	0	0	0	0	0	0	0	0	0	0	0.000964993	0.000884033	0	0	0.00215033	0	0	0	0	0	0	0	0	0	0	0	0.000786221	0
Halobacterium_salinarum	0	0	0	0	0	0	0	0	0	0	0	0	0	0	0	0	0	0	0	0	0	0	0	0	0	0	0	0	0	0	0.0024964	0.00380584	0	0	0.00358916	0	0	0	0	0	0	0	0	0	0	0	0.00837219	0
Halobacterium_unclassified	0.0077866	0.0785548	0.0528732	0	0.0612724	0.0940743	0.0594347	0.0461424	0.100237	0.0376079	0.0293952	0.0516548	0.0715393	0.128161	0.0725173	0.0362178	0.0888057	0.0656916	0.094404	0.0757222	0.0557826	0.0543651	0.137436	0.0789774	0.0657497	0.063233	0.0505544	0.0450691	0.0940442	0.0281695	0.0803462	0.0397365	0.0290703	0.0707011	0.0599089	0.0977145	0.102541	0.0598353	0.00420874	0.109985	0.0455421	0.0686378	0.0412587	0.0308084	0.0791	0.0468349	0.0646826	0.0604487
Halobiforma_lacisalsi	0	0	0	0	0	0	0	0	0	0	0	0	0	0	0	0	0	0	0	0	0	0	0	0	0	0	0	0	0	0	0.00146847	0	0	0	0	0	0	0	0	0	0	0	0	0	0	0	0.00080747	0
Halobiforma_unclassified	0.00613072	0.0234706	0.0182837	0	0.0277425	0.00640662	0	0.00255201	0.00628477	0.00229924	0	0	0	0.019953	0	0	0.0123495	0.0112731	0.0240282	0.0177784	0.0158676	0.0158541	0.0148263	0.00821667	0.012778	0.0220946	0.0103774	0	0.02788	0	0.0179782	0.0267457	0.0134494	0.0044415	0.0233374	0.0170921	0.0119248	0.00761792	0	0.0395747	0	0.0121065	0	0.00414457	0.00335989	0.00866276	0.0208455	0.029048
Halococcus_hamelinensis	0	0	0	0	0	0	0	0	0	0	0	0	0	0	0	0	0	0	0	0	0	0	0	0	0	0	0	0	0	0	0	0	0	0	0.00104354	0	0	0	0	0	0	0	0	0	0	0	0.00573729	0
Halococcus_unclassified	0.031383	0.0499504	0.0612671	0.0143167	0.0716364	0.0520734	0.0616591	0.023793	0.00587204	0.0244556	0	0.044505	0.0403936	0.00693545	0.0119841	0.0129929	0.0552538	0.0472788	0.0404588	0.0474698	0.0318289	0.0427249	0.0610522	0.0213279	0.0660703	0.0334061	0.0800092	0	0.0419482	0	0.0586128	0.0523977	0.0363029	0.0581024	0.051023	0.0617246	0.0185637	0.0293328	0.0119528	0.0464967	0.0134419	0.0558959	0	0.0390834	0.0362614	0.0882924	0.0516143	0.0386763
Haloferax_unclassified	0	0.0241707	0	0	0.0125861	0.0140527	0	0	0	0	0	0	0	0	0	0	0	0.045417	0.0054151	0.0187256	0	0.0224112	0.0276068	0	0.0363459	0.0159782	0.00611355	0	0.010193	0	0.00822342	0.0158527	0.00388772	0	0.0157322	0.0170045	0.00950209	0.0230846	0	0.0247126	0	0	0	0	0	0.0141728	0.0266678	0.0523587
Haloferax_volcanii	0	0.00574791	0	0	0	0	0	0	0	0	0	0	0	0	0	0	0	0.00356982	0.0241106	0	0	0	0	0	0	0	0	0	0.00407118	0	0.00413269	0.00260715	0	0	0.00142301	0	0.00604106	0	0	0	0	0	0	0	0	0	0.00847843	0
Halomicrobium_unclassified	0	0	0	0	0	0	0	0	0	0	0	0	0	0	0	0	0	0	0	0	0	0	0	0	0	0	0	0	0.00113088	0	0.0044054	0.00585859	0	0	0	0	0	0	0	0	0	0	0	0	0	0	0.00781971	0
Halonotius_unclassified	0	0	0	0	0	0	0	0	0	0	0	0	0	0	0	0	0	0	0	0	0	0	0	0	0	0	0	0	0	0	0	0.00178305	0	0	0	0	0	0	0	0	0	0	0	0	0	0	0.00242241	0
Haloquadratum_unclassified	0	0	0	0	0	0	0	0	0	0	0	0	0	0	0	0	0	0	0	0	0	0	0	0	0	0	0	0	0	0	0.00490888	0	0	0	0	0	0	0	0	0	0	0	0	0	0	0	0	0
Halorhabdus_unclassified	0	0	0	0	0	0.00635425	0	0	0	0	0	0	0	0	0	0	0	0.00493626	0.00214133	0	0	0	0.00565468	0	0.00474565	0	0	0	0	0	0.0048879	0.00458498	0	0	0.000932865	0	0.00424762	0	0	0	0	0	0	0	0	0	0.00854218	0
Halorubrum_distributum	0	0.00674274	0	0	0	0	0	0	0	0	0	0.00238979	0	0	0	0	0.0136261	0.00548284	0.00467387	0	0	0.00190854	0	0	0	0	0	0	0.00548855	0	0.00610463	0.00827095	0	0	0.00441134	0.00115701	0.00740974	0.00610972	0	0.00491747	0	0	0	0	0	0	0.00820219	0.00892252
Halorubrum_unclassified	0	0.0277693	0.0273923	0.00485468	0.0246084	0.0164617	0.0315073	0	0.0392657	0.0184582	0	0.000822716	0	0.0462787	0	0	0.0339682	0.0571342	0.0233488	0.0307661	0	0.0090325	0.0320662	0	0.0146057	0.0299779	0.0285299	0	0.0316798	0	0.0194048	0.0364401	0.0347443	0.00769279	0.0264048	0.0397239	0.00918745	0.0266088	0	0.0458546	0	0.0199027	0	0.00567226	0.0267523	0.0302755	0.0234379	0.0368846
Haloterrigena_unclassified	0	0.00173174	0	0	0	0	0	0	0	0	0	0	0	0	0	0	0	0	0	0	0	0	0	0	0	0	0	0	0	0	0.000566409	0.00495958	0	0	0.0012649	0	0	0	0	0	0	0	0	0	0	0	0.00879717	0
Halovivax_unclassified	0	0.00072463	0	0	0	0	0	0	0	0	0	0	0	0	0	0	0	0	0	0	0	0	0	0	0	0	0	0	0.00105549	0	0.00314672	0.00278695	0	0	0.000505961	0	0	0	0	0	0	0	0	0	0	0	0.00288989	0
Natrialba_unclassified	0.0110787	0.0321294	0.0212257	0.00867349	0.0439934	0.0127609	0.0363386	0.0155183	0	0.0276391	0	0.0176296	0.0245294	0.00991297	0	0	0.0422105	0.0259623	0.0358467	0.0248096	0.0257819	0.00935374	0.0184352	0.0173857	0.0148462	0.0421956	0.0356154	0	0.0208082	0	0.0202229	0.0285737	0.0147103	0.0191159	0.0168706	0.0247003	0.0234878	0.0234232	0	0.0538259	0.0139184	0.0280424	0.0164814	0.0228588	0.0328857	0.0245003	0.0224179	0.0306225
Natrinema_pellirubrum	0	0	0	0	0	0	0	0	0	0	0	0	0	0	0	0	0	0	0	0	0	0	0	0	0	0	0	0	0.000859471	0	0	0.000344623	0	0	0.000837997	0	0	0	0	0	0	0	0	0	0	0	0	0
Natrinema_unclassified	0	0.0155611	0.00407228	0	0.00512399	0.0104391	0	0.00525869	0	0	0	0.0215081	0	0	0	0	0.00724322	0	0.00827708	0.0197821	0.00810957	0.00993953	0.00650518	0	0.0257644	0.00945399	0.00970331	0	0.0261159	0	0.0141602	0.0269106	0.00119083	0.00343999	0.0138665	0.0175304	0.00789743	0.00894143	0	0.0250572	0	0	0	0	0	0	0.0337437	0.0162524
Natronococcus_unclassified	0	0	0	0	0	0	0	0	0	0	0	0	0	0	0	0	0	0	0	0	0	0	0	0	0	0	0	0	0.00714718	0	0.00140553	0.00600843	0	0	0.00102773	0	0	0	0	0	0	0	0	0	0	0	0.00152994	0
Natronorubrum_tibetense	0	0	0	0	0	0	0	0	0	0	0	0	0	0	0	0	0	0	0	0	0	0	0	0	0	0	0	0	0	0	0	0	0	0	0.000885431	0	0	0	0	0	0	0	0	0	0	0	0	0
Natronorubrum_unclassified	0	0.0124047	0.0111032	0	0.0101153	0.0159904	0.0131382	0.0067538	0	0.0118821	0	0	0	0.00550116	0	0	0.0478441	0.0124004	0.0354761	0.00586542	0.00740643	0.00784202	0	0.0163004	0.0139323	0.0242542	0.0174471	0.0158216	0.0200543	0	0.0092933	0.0181002	0.00588411	0.00757668	0.0119217	0.00468062	0.010446	0.0034473	0.0157731	0.0525574	0	0.0320092	0.00440764	0	0.0175126	0.0246918	0.0157244	0.0398527
Methanobacterium_unclassified	0	0	0	0	0	0	0	0	0	0	0	0	0	0	0	0	0	0	0	0	0	0	0	0	0.00524266	0	0	0	0	0	0.000566409	0.00323646	0	0	0.00189735	0	0	0	0	0	0	0	0	0	0	0	0.0027199	0
Methanobrevibacter_smithii	0.0067221	0.00539174	0.030351	0.01141	0.0175443	0.0248584	0	0.0285361	0	0.00487182	0	0	0	0	0	0.0162644	0.0144587	0	0.0176248	0	0	0.0153439	0.0335833	0.0265547	0.0257644	0	0.0197045	0	0	0	0.0186076	0.0127211	0.0187381	0.00882494	0.0279385	0	0.00363408	0	0.00389794	0	0.0331283	0.0314425	0	0.00722824	0.00930308	0.00743996	0.0350187	0.00260617
Methanobrevibacter_unclassified	0.0669845	0.0151558	0.0519091	0.0166358	0	0.0535572	0.0825655	0.0419148	0.294071	0.09041	0.0338974	0.0379429	0.0229693	0.0681199	0.16134	0.0156147	0.00227565	0.123219	0.241641	0.0357026	0.0461261	0.195333	0.192972	0.0267319	0.0693891	0	0.0682837	0.304453	0.0477685	0.0976371	0	0.0604888	0.0634643	0.102271	0	0.0206158	0.028286	0.0107882	0.038811	0.0216431	0.302117	0.223567	0.0865315	0.0105665	0.00519831	0.0640279	0.0311301	0.0564309
Methanocaldococcus_unclassified	0	0.0147996	0	0	0	0	0.195613	0	0	0	0.230352	0.13804	0	0	0	0	0	0	0	0	0	0	0	0	0	0	0.0701491	0	0.0314385	0	0	0.160909	0	0	0	0	0	0	0	0	0	0	0	0	0.0849164	0.0991946	0	0
Methanocaldococcus_villosus	0.0278544	0.0143207	0.0357696	0	0.00713048	0.0152572	0	0.0863559	0	0.0156123	0	0	0.00796969	0	0.0468022	0.0748486	0.0561696	0.028012	0.0311935	0.0220226	0.0110393	0.016062	0.0522483	0.0331103	0.0572524	0	0	0	0.0108414	0	0.0206844	0.0225354	0.0326778	0.00766377	0.0619802	0.014147	0.021128	0.00357042	0.00240869	0.00681242	0.0611156	0.00570121	0	0.016748	0.0136297	0.00240141	0.0569479	0.0156913
Methanotorris_unclassified	0	0.0082657	0.00372323	0	0	0.00268834	0	0.0108267	0	0.0154837	0	0.00673844	0	0	0	0	0.0218962	0	0.0203633	0	0	0	0	0	0.0304459	0	0	0	0	0	0.00352432	0.00735695	0.0171095	0	0.0214085	0	0	0	0	0	0	0.00288495	0.00470674	0.00872764	0	0	0.0193155	0
Methanococcus_maripaludis	0	0.00962898	0.0319633	0.0081169	0.00585362	0.0305318	0	0.0501895	0	0.0230728	0	0.00803127	0	0	0	0.03348	0.0458737	0.0148088	0.029258	0.0153011	0	0.0543084	0.0049421	0.018936	0.0401456	0	0.00945249	0	0.00165863	0.0177053	0.0237472	0.014609	0.0394375	0.00259813	0.0286658	0.0157774	0.00355542	0	0	0.0283772	0.0173541	0.0120721	0	0.00708678	0	0.00391887	0.0348912	0.0155646
Methanococcus_unclassified	0	0	0	0	0	0	0	0	0	0	0	0	0	0	0	0	0	0	0	0	0	0	0.00436744	0	0	0	0	0	0.00144753	0	0	0	0	0	0	0	0.00143161	0	0.00369074	0	0	0	0	0	0	0	0	0
Methanothermococcus_unclassified	0.0775309	0.0102185	0.0782709	0.0346012	0.0891973	0.0480409	0.0228354	0.019617	0.0226064	0.150271	0.0291954	0.0765713	0.00992452	0.0399605	0.129465	0.347422	0.0947446	0.0836432	0.117794	0.0399104	0.0457511	0.230367	0.093693	0.139418	0.113158	0.0162349	0.0467765	0.0399929	0.0352082	0.110357	0.148357	0.018265	0.0763533	0.0348208	0.144136	0.0663175	0.052466	0.0402903	0.0259258	0.0929151	0.23413	0.119485	0.0457923	0.0613056	0.0355482	0.0542159	0.120908	0.064919
Methanocella_unclassified	0	0.0127609	0	0	0	0.0101598	0	0	0	0	0	0	0	0	0	0	0.0107399	0	0.00790646	0	0	0.00238095	0.00526391	0.00254695	0.00429674	0	0	0	0.00432751	0	0.00599974	0.00594849	0	0	0.0127755	0.0127621	0.0203257	0	0	0.0119178	0	0	0	0	0.002092	0.00618769	0.0185506	0.00561051
Methanoculleus_unclassified	0	0.00391792	0.00731348	0	0.00567122	0.00616222	0	0	0	0	0	0.00517136	0	0	0	0	0.012183	0	0.0127656	0	0	0.00217309	0.00703387	0	0.00527472	0	0.00133244	0	0.0125603	0	0.00616756	0.0103387	0	0.00373028	0.00542327	0.0205982	0	0.00432451	0	0	0	0.00688611	0	0	0.0037561	0.0019447	0.0138545	0
Methanoplanus_unclassified	0	0.00380738	0.0297027	0.0522883	0.0205623	0.104793	0	0.0206481	0	0.0337651	0.087617	0	0	0.0311551	0	0	0	0.0146551	0	0	0.0215396	0.014418	0	0	0	0	0	0	0	0	0.0857585	0	0	0.0176934	0	0	0.0244632	0	0	0	0	0	0	0	0.013186	0	0.041096	0
Methanosaeta_unclassified	0	0	0	0	0	0	0	0	0	0	0	0	0	0.298932	0	0	0.0447914	0	0	0	0	0	0	0	0	0	0	0	0	0	0	0	0	0	0	0	0	0	0	0.0537946	0	0	0	0	0	0	0	0
Methanolobus_unclassified	0	0	0	0	0	0	0	0	0	0	0	0	0	0	0	0	0	0	0	0	0	0	0	0	0	0	0	0	0.00381484	0	0.00539138	0	0	0	0	0	0	0	0	0	0	0	0	0	0	0	0.00269865	0
Methanosarcina_mazei	0	0	0	0	0	0	0	0	0	0	0	0	0	0	0	0	0	0	0	0	0	0	0	0	0	0	0	0	0	0	0.00224466	0.000344623	0	0	0	0	0	0	0	0	0	0	0	0	0	0	0.00237991	0
Methanosarcina_unclassified	0	0	0	0	0	0	0	0	0	0	0	0	0	0	0	0	0	0	0	0	0	0	0	0	0	0	0	0	0	0	0	0.00178305	0	0	0.00388957	0	0	0	0	0	0	0	0	0	0	0	0.000956214	0
Pyrococcus_furiosus	0	0	0	0	0	0	0	0	0	0	0	0	0	0	0	0	0	0	0	0	0	0	0	0	0	0	0	0	0	0	0	0	0	0	0	0	0	0	0	0	0	0	0	0	0	0	0.00167869	0
Pyrococcus_unclassified	0	0	0	0	0	0	0	0.0238703	0	0	0	0	0	0	0.0315999	0	0	0	0	0	0	0	0.0590523	0	0.0220288	0	0	0	0	0	0.0316979	0	0	0.0121053	0.018183	0.0124817	0.0436876	0	0	0	0	0	0	0	0	0	0	0
Thermococcus_unclassified	0.0856329	0.034119	0.0795508	0.0383582	0.110174	0.0949471	0.0199158	0.123064	0.0659431	0.123612	0.0236637	0.0660132	0.0163717	0.148804	0.0591847	0.0749878	0.104097	0.0974442	0.0855298	0.0952493	0.0313601	0.0825963	0.106588	0.0491228	0.0689562	0.0411385	0.0266645	0.0343474	0.0675062	0.029029	0.10959	0.0390623	0.0297708	0.052819	0.0881478	0.173604	0.089971	0.0345653	0	0.136843	0.0494793	0.077825	0.10528	0.0133107	0.0413805	0.0457152	0.0783246	0.0851169
Candidatus_Nitrosoarchaeum_limnia	0	0	0	0	0	0	0	0	0	0	0	0	0	0	0	0	0	0	0	0	0	0	0	0	0	0	0	0	0	0	0.00635637	0.00242735	0.00190883	0	0.013819	0	0	0	0	0	0	0	0	0	0	0	0.0203992	0
Candidatus_Nitrosoarchaeum_unclassified	0	0	0	0	0	0	0	0	0	0	0	0	0	0	0	0	0.00280293	0	0	0	0	0.00285336	0	0	0	0	0	0	0	0	0.00190901	0.000494459	0	0	0.00316225	0	0	0	0	0	0	0	0	0	0	0	0	0
Nitrosopumilus_unclassified	0	0.0044706	0.00864321	0	0.00664958	0.00247885	0	0.0163947	0	0	0	0	0	0	0	0.0279812	0.0202866	0	0	0	0	0	0.00551676	0.00270198	0.0138041	0	0.0031038	0	0.00189988	0	0.0131743	0.00988918	0.00294205	0	0.0109256	0.00152515	0	0	0	0	0	0.00800231	0	0	0	0	0.0240966	0
Thaumarchaeota_noname_unclassified	0	0	0	0	0	0	0	0	0	0	0	0	0	0	0	0	0.00632741	0	0.00838002	0.00775984	0	0	0.0073327	0.00713145	0.00424864	0	0	0	0	0	0.00266422	0.000494459	0.00196137	0	0.00890175	0	0	0	0	0	0	0	0	0	0	0	0.00367611	0
Granulicella_unclassified	1.24189	0.508383	1.86509	0.469281	1.05901	1.73811	0.958427	1.43941	2.08784	2.35404	1.05812	1.5642	0.562972	1.0001	0.375889	1.19407	0.545878	2.118	1.02187	0.994425	0.816043	3.39167	1.41595	1.33059	1.29359	0.0279693	0.408166	0	1.02298	0.744934	2.21667	0.679207	0.0407335	1.01725	1.08024	2.62286	1.23395	0.0460922	0.216925	1.1713	1.49604	1.30154	3.48147	1.18487	0.392346	1.21336	1.44401	2.33419
Terriglobus_unclassified	0.531894	0.591507	0.306019	0.821817	0.640798	0.291004	0.808346	0.337407	0.737907	0.842616	1.31253	0.702129	0.774958	0.370774	0.432162	0.228792	0.477136	0.440062	0.570603	0.784509	0.571209	0.540911	0.63668	0.359784	0.26045	0.493571	0.095199	1.0368	0.922981	0.241751	0.200593	0.646018	0.293295	0.274546	0.227698	0.682371	0.386896	0.206469	0.343291	0.643296	0.0777174	0.384763	0.498473	0.205092	0.401205	0.581319	0.816203	0.272309
Actinobaculum_unclassified	0	0.757116	0.347823	0.158705	0.510791	0.189859	0.161777	0.13139	0.447025	0.337683	0.53675	0	0.283883	0	0	0	0	0.391229	0	0.772214	0.427885	0.203458	0.43056	0.415861	0.17894	0.316573	0.243147	0	0.754163	0	0.155238	0.807302	0.0605048	1.01564	0.607706	0.413139	0	0.191756	0	0	0.191272	0.200865	0.713393	0	0.669616	0.352124	0.300358	0.463482
Actinomyces_graevenitzii	0	0	0	0	0	0	0	0	0	0	0	0	0	0	0	0	0	0	0	0	0	0	0	0	0	0	0	0	0	0	0.000314672	0.000284689	0	0	0	0	0	0	0	0	0	0	0	0	0	0	0.000488732	0
Actinomyces_johnsonii	0	0.00072463	0	0	0	0	0	0	0	0	0	0	0	0	0	0	0	0	0	0	0	0	0	0	0	0	0	0	0	0	0	0	0	0	0	0	0	0	0	0	0	0	0	0	0	0	0.00773471	0
Actinomyces_massiliensis	0	0	0	0	0	0	0	0	0	0	0	0	0	0	0	0	0	0	0	0	0	0	0	0	0	0	0	0	0	0	0.00511866	0.00242735	0	0	0.00445878	0	0	0	0	0	0	0	0	0	0	0	0.00414359	0
Actinomyces_odontolyticus	0	0.00316872	0	0	0	0	0	0	0	0	0	0	0	0	0	0	0	0.00239127	0	0	0	0	0	0	0	0	0	0	0.000949942	0	0.00409073	0.00323646	0	0	0.00418999	0	0	0	0	0	0	0	0	0	0	0	0.00327238	0
Mobiluncus_curtisii	0	0.000970267	0	0	0	0	0	0	0	0	0	0	0	0	0	0	0	0	0	0	0	0	0	0	0	0	0	0	0	0	0.00264324	0.00298174	0	0	0	0	0	0	0	0	0	0	0	0	0	0	0.00339987	0
Mobiluncus_mulieris	0	0	0	0	0	0	0	0	0	0	0	0	0	0	0	0	0	0	0	0	0	0	0	0	0	0	0	0	0	0	0.00190901	0.00208272	0.00360752	0	0.00545489	0	0	0	0	0	0	0	0	0	0	0	0.00314488	0
Mobiluncus_unclassified	0.0300819	0.0210143	0.0141782	0	0.0253712	0.00940917	0.201852	0.0130694	0.016059	0.0225101	0	0.0242114	0.0558442	0.0417216	0	0.0550576	0.0361883	0.00936011	0.0173571	0.0110751	0	0.0773998	0.0429848	0.0203977	0.0813173	0.060711	0.0306932	0	0.0106755	0	0.00545431	0.000943968	0.00767036	0.0116263	0.0657116	0.0118155	0	0	0	0.0759232	0	0.0106297	0	0.0323785	0	0.035152	0.0396298	0.044866
Tropheryma_whipplei	0	0	0	0	0	0	0	0	0	0	0	0	0	0	0	0	0	0	0.00308846	0	0	0	0	0	0	0	0	0	0	0	0.000293694	0	0	0	0	0	0	0	0	0	0	0	0	0	0	0	0.00331488	0
Actinopolyspora_unclassified	0	0.00508469	0.00390607	0	0	0	0	0	0	0	0	0	0	0	0	0	0	0	0	0	0	0.00289115	0	0	0.0051144	0	0.00523571	0	0.0073432	0	0.01051	0.0102638	0	0	0.00657749	0.0164961	0	0	0	0	0	0	0	0	0	0	0.0066085	0
Brevibacterium_unclassified	0.277164	0.366245	0.613684	0.160591	0.354517	0.389791	0.461209	0.357513	0.148846	0.520818	0.181042	0.542503	0.13135	1.10005	0.321577	0.510762	0.0824228	0.345128	0.0749261	0.204179	0.246404	0.538435	0.392862	0.189714	0.380983	1.00498	0.275674	0.278859	0.0996986	0	0.316056	0.314566	0.627236	0.156643	0.195696	0.32312	0.215921	0.236602	0.0795387	0.693724	0	0.668072	0.61622	0.380126	0.154919	0.399239	0.324284	0.315293
Cellulomonas_unclassified	0.392602	0.0612251	0.0629625	0.0481603	0.116177	0.0484075	0.140523	0.121336	0.0767867	0.0402287	0	0.0856408	0.0846968	0.218085	0.0626174	0.0251042	0.139536	0.10525	0.0482829	0.193377	0.121737	0.0957861	0.0473522	0.187322	0.132125	0.0648037	0.0435943	0.105628	0.0888422	0.200044	0.0942547	0.0669917	0.0652156	0.0622536	0.0511495	0.0902991	0.0356486	0.0387667	0.0192825	0.0534188	0.152576	0.0615113	0.161698	0.0379376	0.0893064	0.0709669	0.0904579	0.0800493
Corynebacterium_accolens	0	0	0	0	0	0	0	0	0	0	0	0	0	0	0	0	0	0	0	0	0	0	0	0	0	0	0	0	0.00340773	0	0.00262226	0.00272702	0	0	0	0	0	0	0	0	0	0	0	0	0	0	0	0
Corynebacterium_aurimucosum	0	0	0	0	0	0	0	0	0	0	0	0	0	0	0	0	0	0	0	0	0	0	0	0	0	0	0	0	0	0	0.00339845	0.00136351	0	0	0.00086962	0	0	0	0	0	0	0	0	0	0	0	0.00244366	0
Corynebacterium_diphtheriae	0	0	0	0	0	0	0	0	0	0	0	0	0	0	0	0	0	0	0	0	0	0	0	0	0	0	0	0	0	0	0.0006713	0.000599344	0	0	0.000363659	0	0	0	0	0	0	0	0	0	0	0	0	0
Corynebacterium_efficiens	0	0.0060304	0	0	0	0	0	0	0	0	0	0	0	0	0	0	0	0	0	0	0	0	0	0	0	0	0	0	0.00266888	0	0.00480399	0.00474981	0	0	0	0	0	0	0	0	0	0	0	0	0	0	0.00654476	0
Corynebacterium_glucuronolyticum	0	0	0	0	0	0	0	0	0	0	0	0	0	0	0	0	0	0	0	0	0	0	0	0	0	0	0	0	0	0	0	0	0	0	0	0	0	0	0	0	0	0	0	0	0	0	0.000679975	0
Corynebacterium_jeikeium	0	0	0	0	0	0	0	0	0	0	0	0	0	0	0	0	0	0	0	0	0	0	0	0	0	0	0	0	0	0	0.00222368	0.00232246	0	0	0.00211871	0	0	0	0	0	0	0	0	0	0	0	0.00446233	0
Corynebacterium_matruchotii	0	0	0	0	0	0	0	0	0	0	0	0	0	0	0	0	0	0	0	0	0	0	0	0	0	0	0	0	0	0	0	0	0	0	0	0	0	0	0	0	0	0	0	0	0	0	0.00053123	0
Corynebacterium_urealyticum	0	0.00426181	0	0	0	0.00197261	0	0	0	0	0	0	0	0	0	0	0	0	0	0	0	0	0	0	0	0	0	0	0	0	0.00432149	0.00491462	0	0	0.00809537	0	0	0	0	0	0	0	0	0	0	0	0.00971089	0
Turicella_otitidis	0.0474687	0.07573	0.0511778	0.0450681	0.0765283	0.0485471	0.0734592	0.0431006	0.0350071	0.0512104	0.0334057	0.064642	0.0137966	0.0331703	0.00432162	0.0179117	0.065411	0.140453	0.0717964	0.0875259	0.0414619	0.0649282	0.0822227	0.0369196	0.0530038	0.0553346	0.0501311	0.050928	0.0656968	0	0.0489629	0.0645494	0.0537275	0.0216269	0.0723998	0.0949973	0.0466767	0.02784	0.0243718	0.111473	0.0319998	0.044545	0.0397475	0.0348964	0.0383534	0.0479546	0.0812782	0.107794
Brachybacterium_unclassified	0.0378488	0.184744	0.117664	0.0568956	0.104254	0.103588	0.161221	0.105251	0.0793006	0.153406	0.0496476	0.0641718	0.136481	0.0164672	0.0576215	0	0.201478	0.136986	0.125556	0.125378	0.0934476	0.0932917	0.174629	0.0516476	0.155789	0.209015	0.055116	0.218371	0.140787	0.109713	0.104702	0.178335	0.0989091	0.0745475	0.150207	0.110775	0.0799812	0.13583	0.0844726	0.156576	0.0350343	0.209056	0.0140415	0.116345	0.230263	0.0622452	0.187885	0.224185
Dietzia_unclassified	0	0.0132521	0	0	0	0.00848397	0	0	0	0	0	0	0	0	0	0	0.00943561	0	0.00290315	0	0	0	0.0190558	0	0.012794	0.00826092	0	0	0.0152141	0	0.00734234	0.00827095	0.00812568	0	0.010388	0.0122187	0.0110753	0	0	0.00870737	0	0	0	0	0.0144222	0	0.0246066	0.0316179
Gordonia_alkanivorans	0	0.00354946	0.00648241	0	0	0.00453875	0	0	0	0	0	0	0	0	0	0	0	0	0	0	0	0	0	0	0.00424864	0	0	0	0.00851932	0	0.00931428	0.0127211	0	0	0.00798469	0	0	0	0	0	0	0	0	0	0	0	0.0148744	0
Gordonia_polyisoprenivorans	0	0.00886751	0.00354039	0	0	0	0	0	0	0	0	0	0	0	0	0	0.00241441	0.0188398	0	0	0	0	0	0	0	0	0	0	0.00554887	0	0.00759408	0.00753676	0	0.00146598	0.00902824	0.0133406	0.00610399	0	0	0	0	0	0	0	0	0	0.0162981	0.00886823
Gordonia_terrae	0	0.0126503	0	0	0	0.00462603	0	0	0	0	0	0.00583736	0	0.0142522	0	0	0.00649392	0.0289514	0.00393264	0.0134067	0	0.0118859	0.015332	0	0.00878586	0.00382086	0	0	0.0108414	0	0.0114541	0.019224	0.00418542	0.00685094	0.0161907	0.0171798	0.0019193	0.00627901	0	0.0153319	0	0	0	0	0.00204446	0	0.0148319	0.0164877
Serinicoccus_unclassified	0.175327	0.089412	0.14976	0.0607299	0.152659	0.0757971	0.223992	0.0834946	0.0800698	0.135366	0.0676566	0.0948866	0.113756	0.121697	0.0665406	0.10095	0.0869741	0.157465	0.10717	0.114831	0.157949	0.127041	0.173732	0.0293231	0.0906804	0.142036	0.0792881	0.102259	0.134002	0.0840788	0.0579835	0.101349	0.0852145	0.0506273	0.0677355	0.151252	0.0563675	0.14731	0.0662002	0.302722	0.0715231	0.158878	0.0933004	0.103543	0.103221	0.0966458	0.100615	0.137928
Agromyces_unclassified	0.0908371	0.0377299	0.0325616	0	0.0216733	0.0450907	0	0.0387442	0	0.0715498	0.0895993	0	0	0.0326983	0	0	0.0157353	0.0311719	0.0980277	0.0715873	0.0477433	0.108636	0.0352383	0	0.0823434	0.0818239	0.0282321	0.0927237	0.138993	0	0.0295582	0.0632159	0.0429925	0.00978291	0.0157322	0.0635653	0.013026	0.0339959	0.0138435	0.294359	0.0298932	0.0501776	0.055253	0	0	0	0.0774959	0.152117
Clavibacter_michiganensis	0.00898909	0.0341067	0.0548511	0	0.026333	0.0281053	0.0246775	0.0151574	0	0.0100009	0.00599275	0	0	0.0466055	0	0	0.0446804	0.041591	0.0144746	0.0354293	0.0156801	0.0260393	0.0688676	0.0330438	0.030991	0.0295702	0.0190931	0	0.0498192	0	0.0351803	0.0454753	0.018598	0.0149937	0.0333302	0.0541865	0.0161567	0.0353502	0	0.0445861	0.0332537	0.0482886	0	0	0.0200642	0.0204341	0.0441346	0.0769726
Curtobacterium_unclassified	0.0233598	0.0455289	0.0423683	0.032715	0.0445406	0.0319458	0.0184213	0.0145903	0.0251953	0.00519339	0.00883546	0.0181781	0.0187025	0.030102	0.00395382	0.0126913	0.0502585	0.0552554	0.0193544	0.0498743	0.0596967	0.0266818	0.0437433	0.0276177	0.0350954	0.0458806	0.0389857	0.0134496	0.0557902	0	0.0339216	0.0733748	0.0332908	0.0126568	0.0404294	0.0485592	0.0423032	0.0461692	0	0.0718984	0.00855167	0.0478593	0.0149073	0.0136078	0.0344864	0.0309532	0.0568416	0.0723032
Leifsonia_unclassified	0.119697	0.116887	0.337484	0.138992	0.439652	0.44986	0.357477	0.394685	0.422561	0.290653	0.256981	0.3532	0.510511	0.758234	0.0694217	0.156472	0.263031	0.34588	0.0836561	0.662009	0.106409	0.220767	0.349579	0.17647	0.172719	0.734436	0.337735	0.48167	1.24347	0.953036	0.170552	0.143528	0.468557	0.271759	0.0784081	0.387755	0.162999	0.460568	0.221924	0.53129	0.0753601	0.886041	0.21237	0.164156	0.612387	0.142479	0.409132	0.174034
Leifsonia_xyli	0	0.0185579	0.0109536	0.0103742	0	0.0133893	0	0	0	0	0	0	0	0	0	0	0.00205363	0.0152529	0.0134245	0.00265948	0	0	0.0370083	0	0.0152951	0	0.00139514	0	0.0156062	0	0.0130274	0.014654	0.00133093	0	0.0142143	0.0081867	0.00726816	0.00150819	0	0	0	0.0170865	0	0	0	0.0060551	0.0239266	0.0214828
Leucobacter_unclassified	0.0513719	0.0294028	0.0812462	0.105643	0.190583	0.0977227	0	0.0662492	0.245819	0.191143	0.132378	0.119901	0.192814	0.265399	0	0.150277	0.0761786	0.111194	0.0816383	0.169642	0.158676	0.220049	0.199178	0.086729	0.0985684	0.133036	0.143057	0.101263	0.248764	0.0343363	0.023999	0.113231	0.163056	0.208591	0.0837839	0.158703	0.0811296	0.128412	0.0426313	0.0848655	0.129379	0.138649	0.295643	0.0557041	0.100495	0.101493	0.0457283	0.212349
Kocuria_rhizophila	0	0.0204493	0.0124329	0.00423625	0.00311751	0.0262025	0	0	0	0	0	0	0	0	0	0	0.00649392	0.00223754	0.00586808	0.0104011	0	0.0114135	0.00505703	0.00243621	0.0136758	0.0132296	0.0199239	0	0.0277745	0	0.017223	0.0165269	0.012171	0.00409315	0.0143724	0.0191432	0.0126485	0.022192	0.00826208	0.0177279	0	0.00724672	0	0.00243299	0.017782	0.00608456	0.0370586	0.0314008
Kocuria_unclassified	0.160227	0.0315644	0.0515767	0.0430892	0.0427497	0.116908	0.268533	0.138969	0.0578574	0.020034	0.0702688	0.0430163	0.0274052	0.0364928	0.0911524	0.0329464	0.074347	0.0647351	0.178204	0.0276695	0.0509075	0.0408352	0.216326	0.0343727	0.0426467	0.0433736	0	0	0.0209289	0.0669966	0.0267051	0	0.0282647	0.00679288	0.0108149	0.0448954	0.0963739	0.0145433	0.00805488	0.0526201	0	0.0723642	0.0888928	0.015871	0	0.0559102	0.0757109	0.0341155
Micrococcus_luteus	0	0.0223284	0.0112362	0	0.0426005	0.0315094	0.00961034	0.0181734	0	0	0	0	0	0	0	0	0.0250321	0.0421546	0.0503419	0.0461583	0.0334696	0.0271164	0.0504784	0	0.0198484	0.00672049	0.00678761	0	0.0271261	0	0.0215865	0.0370844	0.00653206	0.00161113	0.0360497	0.0659494	0.0280815	0.0215918	0	0.038823	0	0.00865485	0	0.005842	0.0096042	0	0.0423922	0.0350928
Rothia_aeria	0	0	0	0	0	0	0	0	0	0	0	0	0	0	0	0	0	0	0	0	0	0	0	0	0	0	0	0	0	0	0	0	0	0	0	0	0	0	0	0	0	0	0	0	0	0	0.00214617	0
Rothia_dentocariosa	0	0	0	0	0	0	0	0	0	0	0	0	0	0	0	0	0	0	0	0	0	0	0	0	0	0	0	0	0.00128167	0	0	0.000509443	0	0	0	0	0	0	0	0	0	0	0	0	0	0	0	0
Rothia_mucilaginosa	0	0.00092114	0	0	0	0	0	0	0	0	0	0	0	0	0	0	0	0	0	0	0	0	0	0	0	0	0	0	0	0	0.0024964	0.00632308	0	0	0.00414255	0.00210365	0	0	0	0	0	0	0	0	0	0	0.006736	0
Rothia_unclassified	0.0428362	0.0186316	0.0193309	0.0116574	0.032651	0.040936	0.0676373	0.0383059	0	0.0164002	0	0	0.0197363	0	0.0243053	0.0241297	0.0338849	0.0266797	0.0781381	0.0662501	0.0734549	0.0273809	0	0.0141079	0.0268867	0.203367	0.00887249	0	0.0300212	0	0.052676	0.00828594	0.0419768	0.00847659	0.0463903	0.0550279	0.0218045	0.00963397	0.044263	0	0.0260061	0	0.0457136	0.0431431	0.0365942	0	0.00745847	0.0508747
Actinoplanes_unclassified	0	0	0	0	0	0	0	0	0	0	0	0	0	0.383247	0	0	0	0	0	0	0	0	0	0	0	0.0790451	0	0.585542	0	0	0.0215655	0	0	0.0574928	0	0.182474	0	0	0	0	0	0.107791	0	0	0	0	0	0
Micromonospora_unclassified	0	0.0223407	0.0204279	0	0.00404613	0.0176662	0.0452538	0	0	0	0	0	0	0	0	0	0.0571964	0.0197621	0.0172954	0.0135342	0	0.0120559	0.0195385	0	0.022125	0.0118099	0.0166007	0	0.0224518	0	0.0376977	0.0360506	0.00180376	0	0.0248869	0.0356919	0.00248565	0.0254238	0	0.0197325	0.0116614	0.0191128	0	0.0279369	0.0128373	0	0.0351887	0.04854
Salinispora_arenicola	0	0.00660764	0	0	0	0	0	0	0	0	0	0	0	0	0	0	0	0	0	0	0	0	0	0	0	0	0	0	0.00770508	0	0.00371313	0.0102488	0	0	0.0023875	0.00152515	0	0	0	0	0	0.00566687	0	0	0	0	0.0148532	0
Salinispora_pacifica	0	0.00819201	0.0159401	0	0	0.00893784	0	0	0	0	0	0	0	0	0	0	0.0171506	0.0160386	0.0233488	0.0163394	0	0.0187642	0.0227337	0	0	0	0.00879411	0	0.0263571	0	0.014391	0.0198833	0.0107175	0.00541399	0.0141195	0.0196866	0.0126957	0.0107113	0	0.023773	0	0.00743562	0	0	0.00201276	0.0103717	0.0244791	0.0217905
Salinispora_tropica	0	0.00313188	0	0	0	0	0	0	0	0	0	0	0	0	0	0	0	0	0	0	0	0	0	0	0	0	0	0	0.0123342	0	0.00927233	0.00358108	0	0	0.00849065	0	0	0	0	0	0	0	0	0	0	0	0.00624727	0
Salinispora_unclassified	0.00607158	0	0	0	0.0307605	0.00385794	0.0141114	0	0	0.0139884	0	0	0	0.0320992	0	0	0.00427377	0	0	0.0102554	0	0	0.0224578	0.0123361	0.0235679	0.0126557	0	0	0	0	0	0	0.00926397	0	0.0132024	0.0177408	0.00358688	0.0206838	0.0231675	0.0156764	0	0.00712652	0	0	0.00901781	0	0	0.0133566
Mycobacterium_abscessus	0	0.00238268	0	0	0	0	0	0	0	0	0	0	0	0	0	0	0	0	0	0	0	0	0	0	0	0	0	0	0	0	0.00228661	0.0044801	0	0	0.00259305	0	0	0	0	0	0	0	0	0	0	0	0.00182743	0
Mycobacterium_avium	0	0.00994831	0	0	0	0	0	0	0	0	0	0	0	0	0	0	0.0241718	0	0	0	0	0.00336357	0	0	0	0	0	0	0.00367914	0	0.0069018	0.0107882	0.0057265	0	0.00588179	0.0118681	0.0132148	0.0108959	0	0	0	0	0	0	0	0	0.0231616	0.011583
Mycobacterium_gilvum	0	0.0101203	0.0193807	0	0	0	0	0	0	0	0	0	0	0	0	0	0	0	0	0	0	0	0	0	0	0.00232574	0	0	0.00110073	0	0.0111604	0.010084	0	0	0.0107359	0.00355867	0	0.00561725	0	0	0	0	0	0	0	0	0.0181256	0
Mycobacterium_hassiacum	0	0.00706207	0	0	0	0	0	0	0	0	0	0	0	0	0	0	0	0	0	0	0	0	0	0	0	0	0	0	0	0	0.00111184	0.00692243	0	0	0.00248237	0	0	0	0	0	0	0	0	0	0	0	0.00809595	0
Mycobacterium_intracellulare	0	0.00529348	0	0	0	0	0	0	0	0	0	0	0	0	0	0	0	0	0	0	0	0	0	0	0	0	0	0	0	0	0.0048879	0.00223256	0	0	0.00319388	0	0	0	0	0	0	0	0	0	0	0	0	0
Mycobacterium_marinum	0	0.00202651	0	0	0	0	0	0	0	0	0	0	0	0	0	0	0	0	0	0	0	0	0	0	0	0	0	0	0.00104041	0	0.00434247	0.00320649	0	0	0.0029409	0.00159527	0	0	0	0	0	0	0	0	0	0	0.0053973	0
Mycobacterium_smegmatis	0	0	0	0	0	0	0	0	0	0	0	0	0	0	0	0	0	0	0	0	0	0	0	0	0	0	0	0	0	0	0.00583192	0.00392571	0	0	0	0	0	0	0	0	0	0	0	0	0	0	0	0
Mycobacterium_tuberculosis_bovis_africanum_canetti	0	0	0	0	0	0	0	0	0	0	0	0	0	0	0	0	0	0	0	0	0	0	0	0	0	0	0	0	0	0	0	0.00263712	0	0	0	0	0	0	0	0	0	0	0	0	0	0	0	0
Rhodococcus_equi	0	0.00972724	0.00382296	0	0	0	0	0	0	0	0	0	0	0	0	0	0	0	0	0	0	0	0	0	0.00344701	0	0	0	0.00511159	0	0.0101744	0.0108481	0	0	0.0110837	0	0	0	0	0	0	0	0	0	0	0	0.0123033	0.00325772
Rhodococcus_erythropolis	0	0.00115449	0	0	0	0	0	0	0	0	0	0	0	0	0	0	0	0	0	0	0	0	0	0	0	0	0	0	0	0	0	0.00130357	0	0	0	0	0	0	0	0	0	0	0	0	0	0	0.000573729	0
Rhodococcus_opacus	0	0.0101817	0.00588403	0	0.0160684	0.00724454	0.0141288	0	0	0	0	0	0	0	0	0	0.0292504	0.0211456	0.0115508	0.0115123	0	0	0.0202971	0.00179393	0.0133391	0.0134863	0.00518868	0	0.0112334	0	0.00998558	0.0149237	0.00308215	0.00100151	0.0088385	0.0121486	0.014552	0.0110806	0	0.0217058	0	0.0109044	0	0	0.00293198	0.00450817	0.0225242	0.00597248
Rhodococcus_ruber	0	0.0112011	0.00206107	0	0	0.00583055	0	0	0	0	0	0	0	0	0	0	0.00560586	0	0.00978013	0.00342453	0	0	0	0	0.00883396	0	0.00728924	0	0.0140682	0	0.0099646	0.0157178	0.00355498	0	0.0136926	0	0.00706364	0.00592505	0	0	0	0	0	0	0.00258331	0	0.0143645	0.0137548
Aeromicrobium_sp_JC14	0	0.0110905	0.00777889	0	0	0	0	0	0	0	0	0	0	0	0	0	0.0105179	0.0135107	0.0143922	0	0	0.00298564	0	0	0.0123611	0.00241636	0.00186542	0	0.011535	0	0.01051	0.0166917	0	0	0.0106726	0.0136737	0.00693779	0.0192526	0	0.0037899	0	0.00917003	0	0	0	0	0.0291114	0
Kribbella_unclassified	0.00682067	0.0408618	0.0325782	0.0276748	0.0512731	0.022781	0.0403009	0.0453948	0	0.0346655	0	0.0246619	0.0239655	0.0325349	0.0233858	0	0.0389913	0.0592693	0.0450709	0.0746475	0.0238365	0.06404	0.0559721	0.0464651	0.0404983	0.0533411	0.0591917	0.0406096	0.0477534	0	0.0221948	0.030177	0.0254102	0.0243847	0.0281282	0.0584639	0.0457642	0.0331187	0.030808	0.0755474	0.00882753	0.0212593	0.0272644	0.0278521	0.033694	0.0418553	0.0516993	0.0726832
Nocardioides_unclassified	0.0232612	0.0395722	0.0505295	0	0	0.0525796	0.072486	0	0	0.0492809	0.0298254	0.0170616	0.10323	0.0615294	0.0264814	0	0.141728	0.0146551	0.0916243	0.117727	0.0420479	0.015325	0.017102	0.0328224	0.0256682	0.0123838	0.0181682	0	0.0470146	0	0.0460889	0.0317053	0.00821324	0.0677837	0.0330456	0.0622855	0.0362307	0.0466309	0.0272726	0.0183387	0.0275108	0.0300001	0.0485785	0.0599336	0.0255161	0.025178	0.0337862	0.0826012
Nocardiopsis_alba	0	0.000761476	0	0	0	0	0	0	0	0	0	0	0	0	0	0	0	0	0	0	0	0	0	0	0	0	0	0	0	0	0.00490888	0.00771656	0	0	0.00309901	0	0	0	0	0	0	0	0	0	0	0	0.00709724	0
Thermobifida_fusca	0	0.00641113	0	0	0	0	0	0	0	0	0	0	0	0	0	0	0	0	0	0	0	0	0	0	0	0	0	0	0.00283475	0	0.00404878	0.00510941	0	0	0.00456946	0	0	0	0	0	0	0	0	0	0	0	0.00463233	0
Propionibacterium_acnes	0	0	0	0	0	0	0	0	0	0	0	0	0	0	0	0	0	0	0	0	0	0	0	0.12212	0	0	0	0	0	0	0	0	0	0	0	0	0	0	0	0	0	0	0	0	0	0	0	0
Propionibacterium_avidum	0	0	0	0	0	0	0	0	0	0	0	0	0	0	0	0	0	0	0	0	0	0	0	0	0	0	0	0	0	0	0.0011538	0	0	0	0	0	0	0	0	0	0	0	0	0	0	0	0.000616227	0
Propionibacterium_granulosum	0	0	0	0	0	0	0	0	0	0	0	0	0	0	0	0	0	0	0	0	0	0	0	0	0	0	0	0	0.00155308	0	0.00224466	0.000299672	0	0	0	0	0	0	0	0	0	0	0	0	0	0	0.00159369	0
Amycolatopsis_mediterranei	0	0.00750422	0.0108539	0	0	0	0	0	0	0	0	0	0	0	0	0	0	0	0.0178719	0	0	0	0	0	0	0	0	0	0.009997	0	0.009587	0.0102788	0	0	0.0101508	0.0115876	0	0.00181599	0	0.0208288	0	0.0201603	0	0	0	0	0.0167231	0.00941118
Pseudonocardia_unclassified	0.0804681	0.217536	0.0760104	0.0510515	0.104304	0.107289	0.145945	0	0.0885683	0.153583	0	0.10378	0.0825728	0.115252	0.0474152	0	0.0255316	0.298311	0.0238223	0.0962512	0.0774394	0.138946	0.0572824	0.0596207	0.0822152	0.355673	0.138637	0.162628	0.244542	0.102493	0.127148	0.176147	0.0770713	0.0461858	0.11226	0.151515	0.064029	0.156437	0.0252783	0.0716165	0.100112	0.0299829	0.181705	0.0302002	0.365182	0.0494573	0.0975764	0.241161
Saccharomonospora_azurea	0	0.0103659	0	0	0	0	0	0	0	0	0	0	0	0	0	0	0	0	0	0	0	0	0.00648219	0	0.00176359	0	0	0	0.00107057	0	0.00983873	0.0096045	0	0	0.010388	0.00355867	0	0	0	0	0	0	0	0	0	0	0.0121758	0
Saccharomonospora_unclassified	0	0.176822	0	0	0	0.274123	0.188853	0.324853	0.135244	0.0946548	0	0.103153	0	0	0	0	0.0748743	0.312061	0	0.185526	0.22388	0	0.261242	0.0861975	0.0476809	0.456586	0.204005	0	0.24988	0	0.159853	0.074978	0.051486	0.0474486	0.686083	0.143241	0.136852	0	0	0	0	0.176566	0.292904	0.1727	0.281533	0.147724	0.0720136	0
Saccharopolyspora_erythraea	0	0.00598127	0	0	0	0	0	0	0	0	0	0	0	0	0	0	0.00324696	0.00985544	0	0	0	0	0	0	0	0	0	0	0	0	0.0042166	0.0126612	0	0	0.00610315	0.00604799	0	0	0	0	0	0	0	0	0	0	0.0111771	0
Saccharopolyspora_unclassified	0	0.00862187	0.0300684	0.0765308	0	0	0	0	0	0	0	0	0	0	0	0	0.0366046	0	0.0738142	0.0489999	0	0.0430839	0	0	0.0266622	0	0	0	0	0	0.0141183	0.00362603	0	0.0511643	0.0147045	0	0	0.0289789	0	0	0.171008	0	0	0	0	0	0.0343812	0
Segniliparus_unclassified	0.00849627	0.0209774	0.0203448	0	0.0283561	0.00792535	0.00947131	0	0	0	0	0	0.0079133	0	0	0	0.015097	0.0477741	0.0424149	0.0187256	0	0.021901	0.027331	0	0.0197522	0.0154949	0.014939	0	0.0407269	0	0.0187754	0.0229998	0.0157435	0	0.0175821	0.0247354	0.0132306	0.0110652	0	0.0244464	0	0.0114024	0.00461228	0	0	0.0195207	0.0149807	0.0227316
Streptomyces_albus	0	0.00820429	0.00668187	0	0.006633	0.00581309	0	0	0	0	0	0	0	0	0	0	0.0023034	0.0164656	0.018922	0.0361397	0	0.0101663	0.0214924	0.00803949	0.0146859	0.0116287	0	0	0.00624247	0	0.0130274	0.0140247	0	0.00561719	0.011558	0.00452285	0.0158106	0.00327801	0	0.0127322	0	0.00793362	0	0	0	0.010799	0.0290477	0
Streptomyces_bottropensis	0	0.000872013	0	0	0	0	0	0	0	0	0	0	0	0	0	0	0	0	0	0	0	0	0	0	0	0	0	0	0	0	0.000545431	0.00626315	0	0	0.00591341	0	0	0	0	0	0	0	0	0	0	0	0.00686349	0
Streptomyces_cattleya	0	0.00334067	0	0	0	0	0	0	0	0	0	0	0	0	0	0	0	0	0	0	0	0	0	0	0	0	0	0	0	0	0.00505572	0.00140846	0	0	0.0040635	0	0	0	0	0	0	0	0	0	0	0	0.00913716	0
Streptomyces_chartreusis	0	0.0129819	0	0	0	0	0	0	0	0	0	0	0	0	0	0	0	0	0	0	0	0	0	0.0143515	0	0	0	0	0	0	0	0.00253223	0	0	0.00727318	0.00797633	0	0	0	0.0170076	0.0546204	0	0.0212039	0	0	0	0	0.0148045
Streptomyces_clavuligerus	0	0.0056865	0	0	0	0	0	0	0	0	0	0	0	0	0	0	0	0	0	0	0	0	0	0	0	0	0	0	0.00117612	0	0.00960798	0.0117621	0	0	0.0144515	0	0	0	0	0	0	0	0	0	0	0	0.0113046	0
Streptomyces_filamentosus	0	0.00072463	0	0	0	0	0	0	0	0	0	0	0	0	0	0	0	0.00954799	0	0	0	0	0	0	0	0	0	0	0	0	0.00717452	0.00593351	0	0	0.00858552	0	0	0	0	0	0	0	0	0	0	0	0.0120058	0
Streptomyces_griseus	0	0.0114958	0.0157739	0	0	0.00329932	0	0	0	0	0	0	0	0	0	0	0	0.00228879	0.0132804	0.00278699	0	0.00933484	0.00763152	0	0.0133872	0.0146341	0.00139514	0	0.0159681	0	0.0106988	0.0149237	0.0102622	0.00528335	0.0154792	0.00273474	0	0.00758714	0	0	0	0	0	0	0.00402552	0	0.0282189	0.0137005
Streptomyces_hygroscopicus	0	0.00201423	0	0	0	0.00200752	0	0	0	0	0	0	0	0	0	0	0	0	0	0	0	0	0	0	0	0	0.00241407	0	0.00449337	0	0.00258031	0.00740191	0	0	0.0102773	0	0	0	0	0	0	0	0	0	0	0	0.00703349	0
Streptomyces_lividans	0	0.00385651	0	0	0	0	0	0	0	0	0	0	0	0	0	0	0	0	0	0.0173959	0	0	0	0	0.00554728	0	0	0	0.00346804	0	0.00511866	0.0124514	0	0	0.00343105	0.00729265	0	0	0	0	0	0	0	0	0	0	0.0148532	0
Streptomyces_sulphureus	0.0048888	0.00876925	0.0172698	0	0	0.0120801	0	0	0	0	0	0	0	0	0	0	0	0	0.00535333	0.00714051	0	0	0.00682699	0	0.00562744	0	0	0	0.0187123	0	0.0115799	0.018265	0	0	0.011732	0.016724	0.00509715	0.00623284	0	0	0	0	0	0	0	0	0.0223754	0.014714
Tsukamurella_unclassified	0	0.0538928	0.0362682	0.010034	0	0.0107708	0	0	0	0	0	0.0765909	0.0481377	0	0	0	0.0194818	0.0105557	0.0187573	0.0244453	0.0290632	0	0	0	0.0452921	0.0528729	0.013685	0	0.0599971	0	0.0209991	0.0387926	0	0	0.021108	0.0258223	0.0170062	0	0	0.041313	0	0	0	0	0.00903366	0.0188135	0.0473857	0
Alloscardovia_omnicolens	0	0	0	0	0	0	0	0	0	0	0	0	0	0	0	0	0	0	0	0	0	0	0	0	0	0	0	0	0	0	0	0.00134852	0	0	0.000679885	0	0	0	0	0	0	0	0	0	0	0	0.000488732	0
Bifidobacterium_adolescentis	5.67125	15.2223	3.30026	0.604315	3.0802	3.17426	2.31891	4.56794	5.14417	6.57442	3.03104	6.4889	6.92358	0.915316	1.01353	0.124779	0.0685469	4.51388	0.230811	2.66602	3.08257	3.09335	1.66928	0.881398	3.76463	7.51583	6.8608	2.48779	5.55286	5.09836	1.67498	3.6345	3.22738	5.31639	3.33599	0.814463	0.121875	0.582624	0.0260035	4.29536	1.12095	2.05517	9.89486	2.07169	4.12592	5.09275	1.40957	6.60292
Bifidobacterium_animalis	0.050879	0.103401	0.0273425	0.0035869	0.0283063	0.0393125	0.0239303	0.068234	0.023263	0.0781099	0	0.0672472	0.0732873	0.00820635	0	0	0.00183162	0.0603112	0.00494154	0.0650114	0.02761	0.0333522	0.0240209	0.0104757	0.0417649	0.0837418	0.0777362	0	0.084771	0.045617	0.034509	0.0537312	0.0476683	0.0302632	0.0670872	0.026208	0.00932904	0.0180829	0	0.0529959	0.00769902	0.0273384	0.0572994	0.0186859	0.0592101	0.0558365	0.0326813	0.0601591
Bifidobacterium_bifidum	0.0759342	0.182803	0.0800827	0.0167749	0.113673	0.0945805	0.064961	0.173176	0.171715	0.170433	0.0581604	0.0875017	0.0962754	0.0769254	0.0301287	0	0.0117668	0.189918	0.0226281	0.13199	0.115643	0.107426	0.0751659	0.043896	0.105511	0.184866	0.170584	0.0712803	0.201765	0.116503	0.0502636	0.15559	0.0769312	0.102648	0.116165	0.0799387	0.0171006	0.0744093	0	0.0891722	0.0450906	0.0852435	0.111356	0.0629889	0.0893064	0.24244	0.0785583	0.207897
Bifidobacterium_breve	0.0894966	0.184756	0.0408392	0.0114564	0.053462	0.0765826	0.0424037	0.0726421	0.0780812	0.111971	0.0219734	0.0800973	0.069716	0.0196081	0.0202595	0	0	0.149318	0	0.0589092	0.0633296	0.0606765	0.0395138	0.0325788	0.091963	0.134485	0.131786	0.00597758	0.167099	0.0817582	0.0487112	0.103027	0.0945485	0.0987581	0.0915314	0.0624959	0.00451507	0.0166825	0	0.0899709	0.0337051	0.0373155	0.0920096	0.0496216	0.107294	0.121529	0.0480445	0.157239
Bifidobacterium_dentium	0.192911	0.386216	0.166398	0.0203155	0.126375	0.134417	0.0480865	0.135153	0.114101	0.205067	0.0862956	0.142741	0.211554	0.0158499	0.00931753	0	0	0.230194	0.0108508	0.157146	0.118995	0.123318	0.086912	0.0242292	0.115178	0.355552	0.231657	0.134401	0.152986	0.118866	0.0772204	0.188134	0.143881	0.147847	0.159014	0.0775545	0.00618265	0.0337035	0	0.158424	0.0199121	0.118901	0.240343	0.0905439	0.194889	0.283588	0.0753497	0.172822
Bifidobacterium_longum	0.186524	0.378589	0.13618	0.0188312	0.147269	0.174689	0	0.352358	0.427852	0.33987	0.161312	0.217177	0.298995	0.0820271	0.0576522	0	0.00346897	0.306458	0.0283933	0.223196	0.218302	0.128987	0.111416	0.0671065	0	0.97065	0.297683	0.101405	0.23557	0.188527	0.101828	0.754904	0.255994	0.0616875	0.0866932	0.10499	0.0244946	0.145602	0.00653973	0.231622	0.0903067	0.103223	0.365425	0.0850414	0.0457547	0.433109	0.0933053	0.186233
Gardnerella_vaginalis	0.122043	0.0879996	0.11296	0.0217378	0.0917676	0.100219	0.138055	0.235223	0.329735	0.132231	0.152293	0.129029	0.153811	0.0284499	0.10519	0.0346865	0.0300274	0.0827379	0.0525656	0.0811687	0.102401	0.109165	0.0763382	0.0531758	0.132349	0.116	0.121158	0.0451639	0.157057	0.119339	0.0400682	0.0546153	0.112936	0.131227	0.0982828	0.0479106	0.0218831	0.0455228	0.0197746	0.111379	0.0159498	0.132416	0.151292	0.10575	0.105789	0.209262	0.0789833	0.104464
Parascardovia_denticolens	0	0.00900261	0.00267607	0	0	0.0046784	0	0.00770759	0	0	0	0	0	0	0	0	0	0.00929179	0	0	0	0	0	0	0.00479375	0.00308085	0.018858	0	0.01345	0	0.0048879	0.0149387	0.0091589	0	0.0219777	0.00571491	0	0	0	0	0	0	0	0	0	0.0138781	0.00599228	0.0045427
Scardovia_unclassified	0.1895	0.154297	0.148314	0.109972	0.171248	0.236539	0.0889434	0.478747	1.06471	0.305671	0.0930413	0.0579427	0.0670093	0.265671	0.0748467	0.111855	0.274132	0.212464	0.169639	0.0967066	0	0.216723	0.142332	0.0924652	0.131788	0.421443	0.486717	0	0.303981	0	0.166524	0.132605	0.326393	0.257114	0.60301	0.0969607	0	0.102649	0.156746	0.328359	0	0.167362	0.297658	0.271731	0.149562	0.595418	0.0299401	0.341119
Scardovia_wiggsiae	0.00790488	0.0152786	0.00824429	0	0	0.0049228	0	0	0	0.00818401	0	0.00209597	0	0	0	0	0	0.00336486	0	0.00582899	0.00243756	0	0	0	0.0122168	0.0094842	0.00948385	0	0.0131032	0	0.00662908	0.0114625	0.00705743	0.00509466	0.0166967	0.00713488	0	0	0	0.00440067	0	0.00549515	0	0	0.00602244	0.00604036	0.0119421	0
Atopobium_vaginae	0	0.0071112	0.00796172	0	0	0.00378811	0	0	0	0.00358553	0	0	0	0	0	0	0.0085198	0	0	0.00351561	0	0	0.00349395	0.0016389	0.00740706	0	0	0	0.00456877	0	0.00696473	0.00578367	0	0	0.00980299	0.00362879	0	0	0	0	0	0.00989126	0	0.00834572	0	0	0.0183593	0
Collinsella_unclassified	1.32993	5.74478	1.0699	0.467998	1.44638	1.18835	1.38229	6.09943	8.45586	4.39599	1.17864	1.84149	4.98927	1.68054	1.13349	0.836119	0.701038	1.7424	1.05617	3.33103	1.77459	1.59887	1.13852	0.796995	1.9605	5.52521	4.30658	2.12859	2.11279	1.76711	0.976384	6.2767	3.2868	2.59241	5.21532	3.65535	1.28127	1.98914	0.764216	2.4212	1.18028	1.65807	4.1228	1.23079	2.2339	4.67554	0.712018	1.25337
Eggerthella_unclassified	0.0230444	0.0906156	0.0274256	0.00347867	0.0327836	0.0174916	0.019603	0.0401362	0.0376711	0.0479143	0	0.0255042	0.00567652	0.00787954	0	0	0.0540882	0.0401221	0.0544393	0.0335349	0.0229927	0.024093	0.0455593	0.0296553	0.0441057	0.0689568	0.0277148	0	0.0542824	0.00371726	0.0202649	0.0729252	0.0340263	0.0304664	0.0354489	0.0469114	0.0405569	0.0236232	0.00169644	0.05807	0.0112852	0.0258444	0.0163713	0.0178938	0.0438845	0.044684	0.0152144	0.0505127
Olsenella_unclassified	0.795456	1.80972	0.790372	0.435669	0.851014	0.771133	0.889834	1.82214	1.57993	1.38791	1.1541	1.01445	1.03642	1.08164	0.8486	0.323547	0.534083	1.26829	0.529053	0.927775	1.01056	0.870937	1.0177	0.502656	0.946356	2.13861	1.39482	1.38511	0.901826	0.844225	0.479455	1.88528	0.875769	0.786334	1.10698	1.34241	0.533108	1.37623	0.523917	1.04726	0.721175	0.781444	1.27452	0.70865	1.24203	1.95466	0.343791	0.772042
Slackia_unclassified	0	0.0772407	0.0253146	0.00338591	0.0302631	0.0176662	0.0411872	0.0603976	0.0370145	0.043364	0.00396443	0.00908905	0.0439085	0.0197533	0.00695749	0.0145707	0.0310542	0.0356299	0.0340348	0.0480345	0.0079455	0.0316704	0.032365	0.0232326	0.0525709	0.101442	0.0412273	0.0461128	0.0632239	0.0109369	0.0221529	0.112017	0.0653732	0.0175483	0.071214	0.0612863	0.0334618	0.0374278	0.00519294	0.0241332	0	0.0402519	0.035639	0.0158569	0.0561988	0.0429897	0.0630464	0.0485038
Hydrogenobacter_thermophilus	0	0	0	0	0	0	0	0	0	0	0	0	0	0	0	0	0	0	0	0	0	0	0	0	0	0	0	0	0	0	0.0006713	0	0	0	0	0	0	0	0	0	0	0	0	0	0	0	0.00486607	0
Hydrogenobaculum_unclassified	0	0.0010808	0	0	0	0	0	0.00840359	0	0	0	0	0	0	0	0.0236889	0.00960212	0	0.00358261	0	0	0.00644369	0	0	0.0100685	0	0	0	0	0	0.00524453	0.00785141	0.0107875	0.00596554	0.017092	0.00624083	0	0	0	0	0	0	0	0	0	0	0.0128133	0
Rhodothermus_marinus	0	0.0103659	0	0	0	0.0018155	0	0	0	0	0	0	0	0	0	0	0.0136261	0	0	0	0	0	0	0	0.00468152	0	0	0	0.00645357	0	0.008622	0.0160175	0.0150605	0	0.00815861	0.0160228	0.00904587	0.00506322	0	0	0	0	0	0	0.00161655	0	0.020633	0
Salinibacter_ruber	0	0.00985006	0	0	0	0	0	0	0	0	0	0	0	0	0	0	0	0	0	0	0	0	0	0	0	0.00527068	0.00794762	0	0.00883597	0	0.00688082	0.00798626	0.012101	0	0.00765265	0.00511888	0	0	0	0	0	0	0	0	0.00733786	0	0.0152569	0
Bacteroides_caccae	0	0	0.00103054	0	0	0	0	0	0	0	0	0	0	0	0	0	0	0	0	0	0	0.00151172	0	0	0	0	0	0	0	0	0.00195097	0.00130357	0	0	0.00240331	0	0	0	0	0	0	0	0	0	0	0	0.00866968	0
Bacteroides_cellulosilyticus	0	0	0	0	0	0	0	0	0	0	0	0	0	0	0	0	0	0	0	0	0	0	0	0	0	0	0	0	0	0	0.000566409	0.00149836	0	0	0.00248237	0	0	0	0	0	0	0	0	0	0	0	0.0039736	0
Bacteroides_dorei	0	0.00103168	0	0	0	0	0	0	0	0	0	0	0	0	0	0	0	0	0	0	0	0	0	0	0	0	0	0	0.00226177	0	0.00159434	0.00617325	0.00119083	0	0.00395282	0	0	0	0	0	0	0	0	0	0	0	0.00495107	0
Bacteroides_eggerthii	0	0.00219845	0	0	0	0	0	0	0	0	0	0	0	0	0	0	0	0	0	0	0	0	0	0	0.00405625	0	0	0	0.000603138	0	0.00432149	0.00238239	0	0	0.00455365	0	0.00276882	0	0	0	0	0	0	0	0	0	0.0111346	0
Bacteroides_finegoldii	0	0.000798321	0	0	0	0	0	0	0	0	0	0	0	0	0	0	0.00724322	0	0.00133833	0	0	0	0	0	0.00283777	0	0.00290002	0	0.00521714	0	0.00608365	0.00364102	0	0	0.00283022	0	0	0	0	0	0	0.00336578	0	0	0	0	0.00716098	0
Bacteroides_fragilis	0	0.000405302	0.00533552	0	0	0	0	0	0	0	0	0	0	0	0	0	0	0	0	0	0	0	0	0	0.00759945	0	0	0	0.00351328	0	0.00625148	0.00302669	0	0	0.00320969	0	0	0.0031395	0	0	0	0	0	0	0	0	0.00329363	0
Bacteroides_massiliensis	0	0	0	0	0	0.00096012	0	0	0	0	0	0	0	0	0	0	0	0	0	0	0	0.0020975	0.00884981	0	0.00129864	0	0.00490652	0	0.00607661	0	0.00291596	0.0038358	0	0	0.0029409	0	0.00481397	0	0	0	0	0	0	0	0	0	0.00907341	0
Bacteroides_ovatus	0	0.00380738	0.00096405	0	0	0	0	0	0.265086	0	0.022081	0	0	0	0	0	0	0	0	0	0	0	0.00305721	0	0.00601222	0	0	0	0.000527745	0	0.00442638	0.0111478	0	0	0.0223571	0.00248932	0	0.0716854	0	0	0	0	0	0	0	0	0.0104759	0
Bacteroides_salyersiae	0	0	0	0	0	0	0	0	0	0	0	0	0	0	0	0	0	0	0	0	0	0	0	0	0	0	0	0	0.00610677	0	0.000608365	0.00244233	0.00110327	0	0.00517029	0	0	0	0	0	0	0	0	0	0	0	0.00514231	0
Bacteroides_stercoris	0	0.0040653	0	0	0	0	0	0	0	0	0	0	0	0	0	0	0.00446804	0	0	0	0	0	0	0	0.00660543	0	0	0	0.000588059	0	0.00264324	0.00394069	0	0	0.00325712	0	0	0	0	0	0	0	0	0	0	0	0.00896716	0
Bacteroides_thetaiotaomicron	0	0.0021002	0.00189486	0	0	0.000680812	0	0	0	0	0	0	0	0	0	0	0	0	0.00557982	0.00311487	0	0.00275888	0	0.00863747	0.00660543	0	0	0	0.00149277	0	0.00788777	0.00440518	0	0	0.00955001	0.00408458	0	0.000923384	0	0.00529333	0	0	0	0.00428602	0	0	0.0126858	0
Bacteroides_uniformis	0	0.00377053	0.00127986	0	0	0	0	0	0	0	0	0	0	0	0	0	0	0	0	0	0	0	0	0	0.00232473	0	0	0	0.000708687	0	0.00975482	0.00572374	0	0	0	0	0.00303626	0	0	0	0	0.00195765	0	0	0	0	0.00492982	0
Bacteroides_vulgatus	0	0.00346349	0.019896	0	0.0116243	0.0139305	0	0.00701158	0	0	0	0	0	0	0	0	0.00488431	0.00174221	0.0074329	0	0	0.00871126	0.0208028	0	0.00933097	0	0.00998547	0	0.0059409	0	0.0146847	0.010953	0.0136595	0	0.0109414	0.00555714	0.0167073	0	0	0.00446331	0.0070219	0.00381226	0	0	0	0	0.0229491	0
Bacteroides_xylanisolvens	0	0.0046057	0.00864321	0	0.00235472	0.00860616	0	0.00239734	0	0	0	0	0	0	0	0.00343385	0	0	0	0.0122591	0	0.0125661	0.0158607	0.00578046	0.00755135	0	0	0	0.00137214	0	0.0101744	0.0160325	0.00520113	0	0.0311798	0.00953654	0	0.0380126	0	0	0	0.00759017	0	0	0	0	0.0106884	0
Anaerophaga_thermohalophila	0	0.001351	0	0	0	0	0	0	0	0	0	0	0	0	0	0	0	0	0	0	0	0	0	0	0.00110625	0	0	0	0.00067853	0	0.00606268	0.0060384	0	0	0.00498055	0	0	0	0	0	0	0	0	0	0	0	0.00682099	0
Dysgonomonas_mossii	0	0.0019651	0	0	0	0.00815229	0	0	0	0	0	0	0	0	0	0	0.00341347	0	0	0	0	0	0	0.00403082	0.0080644	0	0.00233569	0	0.00345296	0	0.0131952	0.00770158	0.00637445	0	0.0130443	0.00562726	0	0	0	0	0	0.00817403	0	0	0	0	0.0114321	0
Dysgonomonas_unclassified	0.212032	0.0528489	0.169025	0.13154	0.227064	0.224843	0.384987	0.34233	0.112901	0.188377	0.185176	0.155611	0.423634	0.379035	0.150552	0.146843	0.311958	0.160915	0.133566	0.213086	0.250951	0.175964	0.228003	0.301802	0.08757	0.0904774	0.237566	0.151053	0.225634	0.08872	0.141141	0.0751428	0.0949338	0.110297	0.061237	0.177548	0.269992	0.0719778	0.114465	0.131957	0.10741	0.189926	0.0688537	0.0865974	0.219217	0.176246	0.162939	0.234791
Odoribacter_unclassified	1.20799	0.230236	0.288052	0.686427	1.01176	0.770138	1.38345	0.274689	0.805745	0.248061	1.14789	0.221467	0.508951	1.69047	0.539068	0.312991	0.280349	0.347127	0.307487	0.787205	0.758315	0.210601	0.55979	0.354978	0.259055	0.972976	0.659888	0.187867	0.344437	0.699252	0.610505	0.272147	0.261913	0.692772	0.244853	1.2236	0.344577	0.121548	0.108145	0.540327	0.063147	0.293733	0	0.299441	0.742614	0.551397	0.341007	0.105713
Parabacteroides_distasonis	0	0	0	0	0	0.00232174	0	0	0	0	0	0	0	0	0	0	0	0	0.00535333	0	0	0	0.00684998	0	0	0	0	0	0.00183957	0	0.00423758	0.00507945	0.00278444	0	0.00777914	0.00476827	0	0	0	0.00209854	0	0	0	0	0	0	0.0126645	0
Parabacteroides_goldsteinii	0	0	0	0	0	0	0	0	0	0	0	0	0	0	0	0	0	0	0	0	0	0	0	0	0	0	0.00205353	0	0	0	0.00404878	0.00343125	0	0	0.00404768	0	0	0	0	0	0	0	0	0	0	0	0.00305989	0
Parabacteroides_johnsonii	0	0.000442147	0	0	0	0	0	0	0	0	0	0	0	0	0	0	0	0	0.00413854	0	0	0.00493197	0	0	0.00625271	0	0	0	0	0	0.00411171	0.00220259	0	0	0	0	0.00132148	0.0108651	0	0	0	0	0	0	0	0	0.0147894	0
Parabacteroides_merdae	0	0.000614093	0	0	0	0	0	0	0	0	0	0	0	0	0	0	0	0	0.00592985	0.00265948	0	0	0	0	0.0207622	0	0	0	0	0	0.000755212	0.00176807	0	0	0.00170762	0	0.00390152	0.0231615	0	0	0	0	0	0	0	0	0.0151719	0
Parabacteroides_unclassified	2.40572	0.359122	1.96746	0.993107	2.14614	2.72803	3.4274	1.92264	4.21051	1.27423	2.5377	0.693882	5.0404	4.03257	1.79375	1.60273	1.52296	1.83407	1.0829	3.07736	1.828	1.11446	2.73266	1.15527	0.580604	0.758796	1.85021	1.25612	2.57852	1.18045	2.39064	1.10588	0.872565	1.85655	0.94504	3.67572	2.30734	0.831169	0.886762	1.98658	0.588912	1.89662	0.407754	0.80621	2.03956	2.65664	1.85161	1.23205
Porphyromonas_asaccharolytica	0	0	0	0	0	0	0	0	0	0	0	0	0	0	0	0	0	0	0	0	0	0	0	0	0	0	0	0	0.000422196	0	0.000566409	0	0	0	0	0	0	0	0	0	0	0	0	0	0	0	0.00208242	0
Porphyromonas_gingivalis	0	0.00149839	0	0	0	0.00183296	0	0	0	0	0	0	0	0	0	0	0	0	0.00158541	0.00657583	0	0	0	0	0	0	0	0	0.00352835	0	0.00923037	0.00248728	0	0	0.00170762	0	0.00460946	0	0	0	0	0.00614769	0	0	0	0	0.0118783	0
Alloprevotella_unclassified	0.725889	0.135039	0.292373	0.378943	0.112545	0.638951	1.09812	0.93682	0.573921	0.417851	0.341771	0.254729	1.51877	0.567491	0.151778	0.299464	0.291699	0.287755	0.406689	0.239571	1.10468	0.300378	0.350774	0.354867	0.203598	0.643672	0.611481	0.199276	0.739914	0.246069	0.263611	0.723679	0.485614	0.431246	0.480678	0.666752	0.41128	0.225336	0.243977	0.135669	0.166294	0.370545	0.1835	0.384638	0.627047	0.418244	0.46642	0.246736
Paraprevotella_unclassified	0.00940306	0.0130802	0.0249988	0	0.0361333	0.0199879	0.0249904	0.00793959	0	0.00356945	0.00308857	0.0333592	0.0674604	0.0598773	0.0188189	0	0.00971312	0.00570488	0.00767997	0.0199461	0.0225474	0.0132464	0.0160446	0.0109851	0.00899429	0.017292	0.0316494	0.0094645	0.0338209	0	0.0245444	0.0172761	0	0.00972485	0.00744711	0.0204229	0.0246677	0.0115885	0.00957002	0.0191844	0	0.0276646	0	0.00321098	0.0185269	0.008044	0.0345725	0.00875963
Prevotella_amnii	0	0.00395476	0.00939118	0	0.0114917	0.00422453	0	0.0342588	0	0.0139884	0	0	0.00774413	0.00361297	0.00962402	0	0	0.0149454	0.0145775	0.00601114	0.0143441	0.0137944	0.0336063	0.00558113	0.0176359	0.00141961	0.0127914	0	0.0193004	0	0.0262646	0.0125113	0.020822	0.00818629	0.0175031	0.0122362	0.00280029	0.0115577	0.00775703	0	0.00677112	0.0131025	0	0.00918029	0.00304292	0	0.0179131	0.00620776
Prevotella_bivia	0.00303579	0.00151067	0.00540201	0	0.00255371	0.00958374	0.00335406	0.00801692	0	0	0	0.00238979	0.0262774	0	0.0104822	0	0.0106844	0	0.0246871	0.00908958	0	0	0.0193776	0.0144401	0.00598016	0.00791357	0.0415251	0	0.0333384	0	0.00895765	0.0216813	0.00464074	0.0127439	0.0121905	0.00590775	0.00629278	0.00264703	0.00520589	0	0	0.00420722	0	0	0.0137565	0.00179738	0.0206755	0.00923019
Prevotella_buccae	0.110964	0.0367351	0.0409721	0.0173624	0.104967	0.0827798	0.1062	0.154513	0.0311612	0.0921626	0.0381846	0.135905	0.778943	0.103505	0.123365	0.0383756	0.0825061	0.0395072	0.0897301	0.132282	0.100854	0.0643802	0.100543	0.124069	0.0725796	0.0928787	0.238993	0.0980608	0.371593	0.0931033	0.0745143	0.183894	0.158503	0.124899	0.0476077	0.136369	0.149862	0.0717315	0.129383	0.0751559	0.0863945	0.095461	0.00963385	0.0842069	0.233924	0.0584442	0.181574	0.0958673
Prevotella_dentalis	0.24649	0.055207	0.111331	0.0952538	0.12679	0.199129	0.0694621	0.153301	0.0887559	0.200725	0.122483	0.206874	0.535435	0.147823	0.10378	0.0277724	0.173948	0.0464248	0.155144	0.0943385	0.273874	0.117895	0.135046	0.207919	0.15154	0.294252	0.624366	0.270604	0.506379	0.113	0.103842	0.299792	0.160342	0.22074	0.0977453	0.402042	0.189853	0.0714545	0.172545	0.246124	0.10736	0.11964	0.0260523	0.140576	0.363311	0.204061	0.14169	0.0881393
Prevotella_denticola	0	0.00910086	0	0	0	0.0081872	0	0	0	0	0	0	0.0127628	0	0	0	0.00535609	0	0.00704169	0	0	0	0	0.0262668	0.02065	0.00453067	0.00708545	0	0.00859471	0	0.0144959	0.0149387	0	0.00505112	0.00521772	0.00506629	0	0	0	0	0	0	0	0	0.0100163	0.0025782	0.0194218	0
Prevotella_disiens	0	0.00216161	0	0	0.00281903	0.00205989	0	0.00283557	0	0	0	0	0.009511	0	0	0	0	0	0.00885359	0	0	0.00419501	0	0.0262668	0.0114473	0.0119308	0.0157542	0	0.00781063	0	0.0099646	0.00939472	0.00246922	0.00490597	0.00705183	0.0076082	0	0	0	0	0	0	0	0.00223495	0	0	0.0228004	0
Prevotella_maculosa	0.0383416	0.0217266	0.0184499	0.01359	0.0404945	0.0335344	0.023322	0.0127085	0.025383	0.0265136	0	0.0414688	0.118192	0.046551	0.00355537	0.011044	0.0340514	0.0272434	0.0308022	0.037342	0.0369853	0.0194633	0.0274689	0.0410612	0.0404983	0.0428752	0.0806832	0.0180513	0.0872589	0	0.039271	0.0369346	0.0246222	0.0230639	0.0193214	0.0566057	0.0464407	0.0177751	0.0255114	0.0296928	0.0148714	0.0447168	0	0.0249098	0.0666113	0.0355056	0.0473007	0.020053
Prevotella_melaninogenica	0	0	0	0	0	0	0	0	0	0	0	0	0	0	0	0	0.00563361	0	0.00347967	0	0	0	0	0	0	0	0	0	0.0037093	0	0.00228661	0.000884033	0	0	0.00107517	0.0012096	0	0	0	0	0	0	0	0	0	0	0.00571604	0
Prevotella_micans	0.0185104	0.0167647	0.00841051	0.00307669	0.0266813	0.0264818	0.0207674	0.0138943	0	0.0218508	0	0.0205875	0.0532127	0.0284499	0	0.00645006	0.019121	0.0196596	0.0243783	0.0422602	0.0188208	0.0208428	0.0167342	0.0411498	0.0123772	0.0215811	0.0499587	0	0.0885858	0	0.0228032	0.0442766	0.010052	0.0208721	0.00850646	0.0203879	0.0193346	0.00352425	0.00771818	0.0153788	0.0135172	0.0309789	0	0.0108636	0.027307	0.021377	0.0236504	0.00816239
Prevotella_nigrescens	0	0	0	0	0	0	0	0	0	0	0	0	0	0	0	0	0	0	0	0	0	0	0	0	0	0	0	0	0	0	0.000524453	0.00500453	0	0	0.00175505	0	0	0	0	0	0	0	0	0	0	0	0	0
Prevotella_oralis	0.0810398	0.0404933	0.0503134	0.0109462	0.0655009	0.0687271	0.0610682	0.0592891	0.0206553	0.0750228	0.0467127	0.0730062	0.233621	0.113219	0.058541	0.0269139	0.09011	0.033324	0.122035	0.101279	0.145996	0.0735072	0.116174	0.125199	0.101871	0.115698	0.193063	0.101548	0.185118	0.0792227	0.0714305	0.0931831	0.0588586	0.132403	0.03284	0.089668	0.0976167	0.0254238	0.0530172	0.0849908	0.0476486	0.079216	0.00365205	0.051899	0.11002	0.0542159	0.139246	0.04597
Prevotella_oris	0	0	0	0	0	0.00546395	0	0.00378935	0	0	0	0	0	0	0	0	0	0	0.0118391	0.00956319	0	0	0	0	0.00330271	0	0.00857465	0	0.00728289	0	0.0130484	0.0106833	0.00654958	0	0.00207128	0	0	0	0	0	0	0	0	0	0.00247237	0	0.00509981	0
Prevotella_veroralis	0	0	0	0	0	0	0	0	0	0	0	0	0	0	0	0	0	0	0	0	0	0	0	0	0	0	0.00128541	0	0	0	0.0035453	0.00149836	0	0	0.00215033	0	0	0	0	0	0	0	0	0	0	0	0.000552479	0
Alistipes_unclassified	0.867073	0.291768	0.743881	0.416436	0.711953	0.997774	0.961521	0.751425	1.1445	0.714646	0.920163	0.594922	0.72199	0.908835	0.390968	0.400971	0.843099	0.938214	0.549396	0.86861	0.718283	0.669123	1.245	1.24278	0.427156	0.290793	0.490542	0.334199	0.938633	0.552109	0.673481	0.567939	0.177311	0.757943	0.420279	1.42913	0.797185	0.233124	0.288577	0.753485	1.22655	0.748645	0.337169	0.364114	0.767306	0.646054	0.766161	0.777617
Cyclobacterium_unclassified	0	0	0	0	0	0	0	0	0	0	0	0	0	0	0	0	0	0	0	0	0	0	0	0.00181608	0.00105815	0	0	0	0.000663451	0	0.0044054	0.00104885	0	0	0.00513866	0	0	0	0	0	0	0	0	0	0	0	0.00571604	0
Echinicola_unclassified	0.145402	0.0298818	0.0245999	0.0203928	0.119958	0.155435	0.118226	0.287346	0.0989429	0.0266101	0.0238634	0.0277177	0.206347	0.0472591	0.118645	0	0.0420162	0.0564339	0.0388322	0	0.155933	0.0577664	0.13192	0.0370525	0.0426467	0.00955971	0.0806519	0	0.0838512	0.13481	0.0914226	0.130492	0.181812	0.0752878	0.0902033	0.089072	0.0672068	0.0154821	0.0200465	0.0445391	0.0462442	0.0902749	0.0947014	0	0.139245	0.0832392	0.045877	0.0549468
Cytophaga_unclassified	0.127444	0.0589652	0.0768082	0.0631572	0.2003	0.0795677	0.131469	0.136649	0.0296603	0.0742993	0.123696	0.0825458	0.169807	0.161603	0.158122	0.147145	0.127991	0.0924225	0.142172	0.155069	0.191981	0.11336	0.167342	0.148498	0.116589	0.0636106	0.0804481	0.136844	0.137696	0.117061	0.0553403	0.0573872	0.0574226	0.0718188	0.0313696	0.137193	0.0979943	0.0862748	0.0905591	0.0598397	0.157416	0.129823	0.0825804	0.0840937	0.189485	0.073884	0.0970451	0.109188
Dyadobacter_unclassified	0	0.00268973	0.0107708	0	0	0	0	0	0	0.00393926	0	0	0	0	0	0	0.00319146	0.00174221	0.00150305	0	0	0.0053099	0	0	0	0	0	0	0.00333234	0	0.00935624	0.00834587	0	0	0.00520191	0	0	0	0	0	0	0	0	0	0.00155316	0	0.0126433	0.00412644
Hymenobacter_unclassified	0.554997	0.218052	0.374251	0.320254	0.591747	0.483464	0.61859	0.484083	0.362228	0.358312	0.791611	0.517077	0.706746	1.15196	0.354189	0.170463	0.268804	0.518137	0.397032	0.583627	0.61021	0.487131	0.607327	0.433003	0.263095	0.239627	0.420268	0.33325	0.553801	0.30258	0.351404	0.304887	0.216136	0.368224	0.250182	0.668242	0.50693	0.245435	0.193731	0.580324	0.365114	0.679835	0.310723	0.345781	0.395183	0.371777	0.442536	0.359181
Pontibacter_unclassified	0	0.0061655	0.00742984	0	0	0.00534176	0	0	0	0	0	0	0	0	0	0	0	0	0	0.0101097	0.0092346	0	0	0	0	0	0	0	0.0109168	0	0.0154399	0.00620322	0.00267937	0.0102764	0.0120166	0.0027698	0	0	0	0.00862906	0	0	0	0	0	0	0.0198255	0
Rhodonellum_psychrophilum	0	0	0	0	0	0	0	0	0	0	0	0	0	0	0	0	0	0	0	0	0	0	0	0	0	0	0	0	0	0	0.0013426	0.00248728	0	0	0	0	0	0	0	0	0	0	0	0	0	0	0	0
Spirosoma_unclassified	0	0.00230899	0	0	0	0	0	0	0	0	0	0	0	0	0	0	0	0	0	0	0	0	0	0	0	0	0	0	0.00373945	0	0.00383899	0.0032964	0	0	0.001676	0	0	0	0	0	0	0.0014253	0	0	0	0	0.00501481	0
Blattabacterium_punctulatus	0	0	0	0	0	0	0	0	0	0	0	0	0	0	0	0	0	0	0	0	0	0	0	0	0	0	0	0	0	0	0.2741	0	0	0	0.59365	0	0	0	0	0	0	0	0	0	0	0	0.507537	0
Blattabacterium_sp_Blaberus_giganteus	0	0	0	0	0	0.459723	0	0	0	0	0	0	0	0	1.98899	1.56641	0	0	0.541881	0	0	0	0	0	0	0	0	0	0	0	0.726787	0.198263	0	0	0	0	0	0	0	0	0	0	0	0	0	0	0	0
Blattabacterium_sp_Blatta_orientalis	0	0	0	0	0	0	0	0	0	0	0	0	0	0	0	0	0	0	0	0	0	0	0	0	0	0	0	0	0	0	2.13016	0	0	0	0	0	0	0	0	0	0	0	0	0	0	0	0	0
Blattabacterium_sp_Blattella_germanica	0	0	0	0	0	0	0	0	0	0	0	0	0	0	0	0	0	0	0	0	0	0	0	0	0	0	0	0	0	0	0	0	0	0	0	0	0	0	0	0	0	0	0	0	0	0	0.253482	0
Blattabacterium_sp_Mastotermes_darwiniensis	0	0	0	0	0	0	0	0	0	0	0	0	0	0	0	0	0	0	0	0	0	0	0	0	0	0	0	0	0	0	0	0	0	0	0.26604	0	0	0	0	0	0	0	0	0	0	0	0.350357	0
Blattabacterium_sp_Nauphoeta_cinerea	0	0	0	0	0	0	0	0	0	0	0	0	0	0	0	0	0	0	0	0	0	0	0	0	0	0	0	0	0	0	0	0	0	0	0.275891	0	0	0	0	0	0	0	0	0	0	0	0	0
Blattabacterium_sp_Periplaneta_americana	0	0	0	0	0	0	0	0	0	0	0	0	0	0	0	0	0.925494	0	0	0	0	0.636489	0	0	0	0	0	0	0	0	0.240115	0.172596	0.302874	0	0.171616	0	0	0	0	0	0	0	0	0	0	0	0	0
Blattabacterium_unclassified	0.106726	0.0594565	0.126989	0.0708876	0.147269	0	0.0489206	0.256928	0.075042	0.139787	0.0565931	0.0966299	0.0836254	0.0579709	0	0	0	0.139855	0	0.111935	0.172153	0	0.196029	0.15481	0.150755	0.0598048	0.0727983	0.100409	0.0878018	0.136464	0	0	0	0.0644598	0	0.110722	0.0961379	0.0535563	0.0345117	0.112006	0.195936	0.144625	0.0655007	0.0900347	0.109196	0.0689043	0	0.0410653
Bergeyella_zoohelcum	0	0	0.00487012	0	0	0.00576072	0	0.00229423	0	0.00207414	0	0.00419193	0	0	0.0123825	0	0.00793701	0	0.00434443	0	0	0.00360922	0.0131943	0	0.00929891	0	0	0	0	0	0.00331454	0.00344623	0.00616431	0	0.00629288	0.00206859	0.00143161	0	0	0	0.0103824	0	0	0	0.00153731	0	0.00975339	0
Capnocytophaga_ochracea	0	0.00427409	0	0	0.00870582	0.00422453	0	0.0172196	0	0	0	0	0	0	0	0.0285613	0.00624415	0.0063881	0.00553864	0	0	0.0109032	0.0236991	0	0.00543505	0	0	0	0	0	0.0091045	0.00633807	0.0116106	0	0.010973	0.0141646	0.00180917	0	0	0.00286591	0.00872722	0.0184946	0	0	0	0	0.0195068	0
Capnocytophaga_unclassified	0.173769	0.0722665	0.0769578	0	0.188875	0.140596	0.19278	0.0325832	0.442166	0.0870818	0.0756776	0.0453473	0.274522	0.15327	0.0672149	0.160045	0.269303	0.101817	0.213701	0.08534	0.0514934	0	0.0994396	0.0396438	0.0173152	0.120017	0.161319	0.116563	0.111128	0.0726477	0.092975	0.0703481	0.0320824	0.109122	0.0105936	0.233452	0.238858	0.0494472	0.0664851	0.0937921	0	0.141071	0.0643988	0.0794399	0.161877	0.0667534	0.174116	0.0878678
Cellulophaga_unclassified	0.354596	0.0292923	0.196284	0.0513607	0.377965	0.387871	0.295036	0.0762252	0	0.0666298	0	0.138804	0.168059	0.703694	0.514272	0.653475	0.158157	0.275969	0.191732	0.195909	0.394041	0.631462	0.439801	0.121367	0.0696296	0	0.141082	0.356757	0.425197	0.222369	0.376788	0.125757	0	0.10021	0.19821	0.792322	0.368332	0.113515	0.101748	0.665659	0.111648	0.122112	0	0.0607964	0.644147	0.664013	0.192624	0.134471
Chryseobacterium_unclassified	0.0306142	0.00380738	0.0175524	0	0.0054059	0.00490534	0	0.0234836	0	0.031498	0	0.00240938	0	0	0.00358602	0.00754054	0.0130156	0.00391143	0.0282285	0.00683085	0.00290632	0.00391156	0.0302273	0.0330881	0.0322095	0	0.00373084	0	0.0166768	0.0116675	0.0159434	0.0101889	0.00598918	0.00709769	0.0165702	0.0190906	0.0145363	0	0	0.00507408	0	0.013051	0	0.00844473	0.00172749	0	0.0301951	0.0434905
Elizabethkingia_anophelis	0	0.00633744	0.016821	0	0.00553856	0.00501008	0	0.0424046	0	0.0213042	0	0.00750239	0	0	0.0189415	0.0274708	0.0261699	0	0.0157512	0	0	0.030102	0.0227107	0	0.0187902	0	0.00261786	0	0.00316647	0	0.0146847	0.0140996	0.0097368	0	0.0247446	0.00629342	0	0	0	0.0261691	0.00812535	0.0107155	0	0	0.00183843	0	0.0199105	0
Elizabethkingia_meningoseptica	0	0.00164577	0	0	0	0	0	0	0	0	0	0	0	0	0	0	0	0	0	0	0	0	0	0	0.00386386	0	0	0	0	0	0.00539138	0.00302669	0	0	0.00656168	0	0	0	0	0	0	0.00178592	0	0	0	0	0.00973214	0
Elizabethkingia_unclassified	0	0	0	0	0	0	0	0	0	0	0	0.000372181	0.0063344	0	0	0	0	0.0063027	0.0133833	0.00504572	0	0	0	0.0242071	0	0	0	0	0.00827806	0	0	0	0	0	0	0.00166539	0	0.00857208	0	0	0	0	0	0	0	0.00375681	0	0
Gillisia_unclassified	0.342867	0.109296	0.162708	0.216837	0.268172	0.306034	0.253084	0.146135	0.162447	0.133083	0.192598	0.285874	0.367978	0.386388	0.336626	0.598232	0.709447	0.240254	0.860219	0.278917	0.387173	0.324017	0.337534	0.633303	0.261283	0.0683678	0.210212	0	0.101915	0.252924	0.174811	0.148368	0.100993	0.0981339	0.0221358	0.181492	0.108299	0.0930001	0.0577568	0.0652426	0.186206	0.371953	0.153827	0.107179	0.114506	0.258056	0.0315551	0.167048
Myroides_odoratimimus	0	0	0	0	0	0	0	0	0	0	0	0	0	0	0	0	0	0	0	0	0	0	0	0	0.0021644	0	0	0	0	0	0.00388095	0.00263712	0	0	0.00219777	0.00101676	0	0	0	0	0	0	0	0	0	0	0.0116658	0
Myroides_unclassified	0.0877816	0.0080569	0.0413877	0.0154608	0.0876717	0.0429261	0.0382676	0.0807363	0.0868799	0.0210791	0.0345428	0.0487165	0.0508256	0.0461516	0.106569	0.0645703	0.0451799	0	0.0456063	0.0536631	0.0564154	0.0816893	0.0403643	0.0250265	0.0476168	0.0195272	0.0790373	0	0.0386913	0.058058	0.0116638	0.0252474	0.0549534	0.0138615	0.0380893	0.0817969	0.0478094	0	0.00985492	0.0469665	0.0455671	0.0899487	0	0.0426056	0.035358	0.0539213	0	0.0755971
Polaribacter_unclassified	0	0.00504785	0.016206	0	0.00696465	0.0113469	0	0	0	0	0	0.00615078	0	0	0.0061606	0.0255218	0.0256426	0.0161752	0.00430326	0.00945389	0.0203677	0.0134732	0.0223429	0.0156582	0.0213234	0	0	0	0.00131182	0	0.012503	0.0151934	0.00674221	0	0.0211239	0.0121486	0.00283175	0	0	0	0	0.0160905	0	0	0.00147391	0	0.0281552	0
Psychroflexus_unclassified	0	0.00125275	0.00462079	0	0	0	0	0.00216534	0	0	0	0	0	0	0	0	0	0	0	0	0	0	0	0	0.00404021	0	0	0	0	0	0.00610463	0.00401561	0	0	0.00765265	0	0	0	0	0	0	0	0	0	0.00559453	0	0.0130895	0
Riemerella_anatipestifer	0	0.00507241	0.00390607	0	0	0	0	0	0	0	0	0	0	0	0	0	0.0132098	0.00355274	0	0	0	0	0.0140218	0.00772942	0.00561141	0	0	0	0	0	0.00759408	0.00331138	0.00334484	0	0.0071625	0	0.00435775	0	0	0	0	0.0081912	0	0	0	0	0.0113683	0
Riemerella_unclassified	0.434532	0.413616	1.21479	0.3357	0.370536	0.407405	0.0908725	0.311397	0.622286	0.925421	0.37845	0.283504	0.549157	0.541819	0.420147	0.444869	0.675867	0.53754	0.510728	0.853619	0.193153	1.50072	2.2444	1.23919	0.961443	0	0.230512	0	0.312621	0.0908257	0.466679	0.0651787	0.29713	0.109151	0.31183	0.253297	0.559853	0.154559	0.0831258	0.543803	0.91207	0.939464	0.322041	0.341651	0.242879	0.292103	1.70752	1.04357
Candidatus_Sulcia_muelleri	0.777714	0.272522	0.798117	0.478109	1.29818	0.60114	0.649558	1.21027	1.11625	0.782659	0.896361	0.565147	0.681822	0.86379	1.45145	1.20639	1.68401	0.713367	0.614418	0.855258	1.2417	1.14363	1.18905	0.975303	0.742854	0.316346	0.49305	1.71431	0.352579	1.22723	0.575325	0.423796	0.819485	0.466648	0.767558	0.614511	0.719359	0.480929	0.257406	0.862625	0.953198	0.62983	0.553758	0.427074	0.360094	0.534499	0.844783	0.737348
Saprospira_grandis	0	0.000454429	0	0	0	0	0	0	0	0	0	0	0	0	0	0	0	0	0	0	0	0	0	0	0	0	0	0	0.000663451	0	0.00241248	0	0	0	0.00320969	0	0	0	0	0	0	0	0	0	0	0	0	0
Pedobacter_unclassified	1.75197	0.382199	1.53033	0.255814	1.12948	1.48499	1.46943	1.20726	1.26778	0.835429	3.42069	0.781776	0.836968	2.28147	1.25299	1.5921	2.33176	1.63197	3.85973	2.28666	2.88499	1.86119	0.819952	2.47773	0.993332	0.258611	0.232346	1.46887	0.982843	1.40888	2.08688	1.18859	1.46637	0.385075	0.74411	0.927902	1.92419	0.685274	0.340273	0.482617	1.00361	1.18764	0.138746	0.916614	0.987125	0.339189	1.51239	1.40487
Sphingobacterium_spiritivorum	0	0	0	0	0	0	0	0	0	0	0	0	0	0	0	0	0	0	0	0	0	0	0	0	0	0	0	0	0	0	0.0011538	0.000269705	0	0	0.000347848	0	0	0	0	0	0	0	0	0	0	0	0	0
Sphingobacterium_unclassified	0.58295	0.114885	0.598758	0.237895	0.818595	0.439281	0.678737	0.0989871	0.401737	0.358682	0.685094	0.504246	0.507861	0.99905	0.982447	0.569717	0.794589	0.533492	0.378625	1.00115	0.393736	0.429252	0.571192	0.792565	0.202732	0.257448	0.336794	0.337164	0.490125	0.638788	0.107555	0.248863	0.115861	0.283545	0.189656	0.352379	0.543712	0.270197	0.227363	0.292856	0.578805	0.923322	0.282089	0.378895	0.480939	0.210985	0.35569	0.487463
Niabella_unclassified	0.0536191	0.016949	0.0312651	0.0676873	0.0512897	0.0501706	0.00967986	0.0876963	0.0278593	0.00680125	0	0.027561	0.0593028	0	0.0713833	0	0.0477608	0.0166706	0.059319	0.0324055	0	0.0113946	0.0663161	0.0365874	0.0214035	0.023937	0.0317905	0	0.0399428	0	0.0247332	0.0348219	0.0330806	0.0033529	0.0207918	0.0459121	0.00917172	0.0112807	0.0611368	0.00740753	0.0732284	0.0720894	0	0.0368343	0.0201593	0.0157933	0.0253716	0.0265504
Chlamydia_muridarum	0	0	0	0	0	0	0	0	0	0	0	0	0	0	0	0	0	0	0	0	0	0	0	0	0	0	0	0	0	0	0	0	0	0	0.000458527	0	0	0	0	0	0	0	0	0	0	0	0	0
Chlamydia_pecorum	0	0	0	0	0	0	0	0	0	0	0	0	0	0	0	0	0	0	0	0	0	0	0	0	0	0	0	0	0	0	0.00551724	0.00104885	0	0	0.000664073	0	0	0	0	0	0	0	0	0	0	0	0.0013812	0
Chlamydia_pneumoniae	0	0	0	0	0	0	0	0	0	0	0	0	0	0	0	0	0	0	0	0	0	0	0	0	0	0	0	0	0	0	0	0.000254721	0	0	0.00153369	0	0	0	0	0	0	0	0	0	0	0	0.00214617	0
Chlamydia_psittaci	0	0	0	0	0	0	0	0	0	0	0	0	0	0	0	0	0	0	0	0	0	0	0	0	0	0	0	0	0	0	0	0	0	0	0.000980299	0	0	0	0	0	0	0	0	0	0	0	0.000956214	0
Chlamydia_trachomatis	0	0	0	0	0	0	0	0	0	0	0	0	0	0	0	0	0	0	0	0	0	0	0	0	0	0	0	0	0	0	0.000650322	0	0	0	0	0	0	0	0	0	0	0	0	0	0	0	0.00558854	0
Chlamydophila_abortus	0	0	0	0	0	0	0	0	0	0	0	0	0	0	0	0	0	0	0	0	0	0	0	0	0	0	0	0	0	0	0.00629343	0	0	0	0.00486987	0	0	0	0	0	0	0.0331941	0	0	0	0	0.00713973	0
Chlamydophila_unclassified	0.216172	0.0238023	0.11168	0.104376	0.215059	0.101336	0.0399707	0.030985	0.0773871	0.0812452	0.188264	0	0.0341531	0	0.209001	0	0.0642731	0.0672971	0.0584337	0.0796203	0.128112	0.139985	0.153205	0.0986443	0.0565951	0	0.143339	0	0.0518397	0.0903745	0.0609414	0.0170364	0.0135895	0.149327	0.016333	0.112002	0.0187053	0.0153743	0.0206811	0.0300529	0.317616	0.140487	0	0.0494095	0	0	0.0771559	0.109296
Parachlamydia_acanthamoebae	0	0	0	0	0	0	0	0	0	0	0	0	0	0	0	0	0	0	0	0	0	0	0	0	0	0	0	0	0	0	0.000524453	0.00305666	0	0	0.00246656	0	0	0	0	0	0	0	0	0	0	0	0.00452608	0
Chlorobaculum_unclassified	0	0.013289	0.0161063	0	0.00620186	0.0128132	0.00802889	0.0125796	0	0	0	0.0167873	0	0.00481124	0	0	0.0105179	0	0.00572395	0.00803308	0	0.00941043	0	0.0146837	0.011319	0.00762662	0.00294705	0	0.00800665	0	0.0102373	0.0150735	0.00274942	0.00416572	0.00983461	0.0165662	0.00740974	0.00932618	0	0.0361137	0	0	0.00409281	0	0.016213	0.00209203	0.0219504	0.0109676
Chlorobium_phaeobacteroides	0.179348	0.34808	0.0397089	0	0	0.028018	0.0497374	0.0771016	0	0.168504	0.0585753	0.0351025	0.33999	0	0	0	0.0266695	0.167491	0	0.0660497	0	0.0290249	0.0317674	0.0306962	0.0704312	0.0928938	0.214053	0	0.0752716	0.224926	0.0232437	0.0763265	0.0169168	0.0844756	0.0685893	0	0	0.0191448	0	0	0	0	0.299059	0.0307518	0.100242	0.0516672	0.0374624	0.170017
Chloroflexus_unclassified	0	0.00181772	0	0	0	0	0	0	0	0	0	0	0	0	0	0	0	0	0	0	0	0	0	0	0.00341494	0	0	0	0	0	0.00113282	0.000434525	0	0	0.00186573	0	0	0	0	0	0	0	0	0	0	0	0.00295364	0
Roseiflexus_unclassified	0	0.00693926	0	0	0	0	0	0	0	0	0	0	0	0	0	0	0	0	0	0.00774163	0	0	0.00491911	0	0.00545108	0	0.00141082	0	0.00414657	0	0.00834929	0.00759669	0.00264435	0	0.00970812	0.00273474	0	0	0	0	0	0	0	0	0	0	0.00966839	0
Dehalococcoides_mccartyi	0	0	0	0	0	0	0	0	0	0	0	0	0	0	0	0	0	0	0	0	0	0	0	0.00411941	0	0	0	0	0	0	0.00472007	0.00115374	0	0	0.00178667	0	0.00781877	0	0	0	0	0	0	0	0	0	0.00703349	0
Crocosphaera_watsonii	0	0	0	0	0	0	0	0	0	0	0	0	0	0	0	0	0	0	0	0	0	0	0	0	0	0	0	0	0	0	0.0015314	0	0	0	0	0	0	0	0	0	0	0	0	0	0	0	0	0
Cyanobacterium_unclassified	0.221553	0.0423602	0.0588736	0.0246135	0.264491	0.106224	0	0.152425	0.045588	0.0319	0.055456	0	0	0.0561554	0	0.208583	0.0527006	0.158558	0.023987	0.0312762	0.113323	0.0274943	0.0941987	0.0303197	0.121816	0	0	0	0	0.500669	0.0964574	0.0884033	0.0167067	0	0.0834361	0.0824806	0.138079	0.189324	0	0.424954	0.127222	0.116926	0	0.212915	0	0.0244561	0.0518481	0
Cyanobium_unclassified	0.0502877	0.0770196	0.0705751	0.0367348	0.134816	0.0537842	0.497774	0.0270152	0.0129447	0.104382	0.134745	0.0437606	0.0584569	0.0634902	0.0327339	0.00993032	0.054005	0.0594401	0.0627163	0.111917	0.0497121	0.0517574	0.0712812	0.0726876	0.0824877	0.167257	0.0754005	0.0325446	0.118155	0.0446286	0.0775351	0.097858	0.184666	0.0537915	0.0949625	0.154758	0.0982145	0.0833508	0.0204739	0.125568	0.0444637	0.122044	0.185593	0.0691846	0.107279	0.0744438	0.0819369	0.109061
Synechocystis_sp_PCC_6803	0	0	0	0	0	0	0	0	0	0	0	0	0	0	0	0	0	0	0	0	0	0	0	0	0	0	0	0	0	0	0	0.000958951	0	0	0	0	0	0	0	0	0	0	0	0	0	0	0	0
Anabaena_unclassified	0	0	0	0	0	0	0	0	0	0	0	0	0	0	0	0	0	0	0	0	0	0	0	0	0	0	0	0	0	0	0.00245444	0.00218761	0	0	0.00401606	0	0	0	0	0	0	0	0	0	0	0	0.00633226	0
Microcoleus_unclassified	0	0	0	0	0	0	0	0	0	0	0	0	0.0460325	0	0	0.0596747	0	0	0.0262725	0.0715691	0	0	0	0.0997517	0	0	0	0	0	0	0	0.0183699	0	0	0	0	0	0.0829353	0	0	0	0	0	0	0	0	0	0
Oscillatoria_unclassified	0	0	0	0	0	0	0	0	0	0	0	0	0	0	0	0	0	0	0	0	0	0	0	0.00733077	0	0	0	0	0	0	0.000608365	0.00211269	0	0	0.0021029	0	0	0.0131121	0	0	0	0	0	0	0	0	0	0
Fischerella_muscicola	0	0	0	0	0	0	0	0	0	0	0	0	0	0	0	0	0	0	0	0	0	0	0	0	0	0	0	0	0	0	0.00176216	0	0	0	0.00153369	0	0	0	0	0	0	0	0	0	0	0	0.00501481	0
Gloeobacter_unclassified	0.0971058	0.0788373	0.077257	0.0723873	0.146274	0.104356	0.147613	0.0891141	0.0331686	0.0910371	0.0966369	0.10852	0.0986249	0.132409	0.0982938	0.0218096	0.0657162	0.0598842	0.101816	0.108401	0.0606108	0.0757936	0.0665459	0.0489235	0.0775657	0.095733	0.0894774	0.0794639	0.0904556	0.0556084	0.042166	0.0925837	0.0638496	0.110384	0.0555134	0.0992046	0.0858177	0.124457	0.0298756	0.100464	0.0497552	0.119262	0.116991	0.112526	0.0690203	0.129087	0.0624089	0.0613355
Deinococcus_unclassified	3.87552	1.28032	2.54835	1.56505	2.80407	2.05535	2.14971	1.36339	1.38755	0.971036	3.98908	1.70104	1.33579	3.96203	1.97581	1.08213	1.25713	5.08191	1.84155	3.97969	3.39313	2.16742	3.37097	1.48722	1.22228	1.03417	0.841037	0.708936	3.91483	2.43031	1.24184	1.94379	2.01547	1.01776	1.13329	3.99329	1.92137	2.73203	0.572906	2.79251	1.40508	2.14335	0.913878	1.12748	1.24722	3.04504	3.77866	3.47363
Meiothermus_ruber	0	0	0	0	0	0	0	0	0	0	0	0	0	0	0	0	0	0	0	0	0	0	0	0	0	0	0	0	0	0	0.00165727	0.00513938	0	0	0.00183411	0	0	0	0	0	0	0	0	0	0	0	0.00197618	0
Meiothermus_unclassified	0.0211717	0.075337	0.0560645	0.0125078	0.0368961	0.030462	0.0339577	0.0038409	0.0280469	0.0419009	0	0.0669926	0.0442092	0.0173386	0.00508786	0	0.0652444	0.0136302	0.0794352	0.0533352	0.020227	0.0383409	0.0520644	0.0151709	0.03641	0.0239672	0.0368538	0.0604163	0.0572528	0.0325314	0.0347607	0.0384929	0.0439207	0.0195223	0.0332669	0.0356218	0.0391883	0.0171903	0.0221444	0.0538416	0.0215673	0.0479451	0.0569216	0.0440908	0.0415073	0.0341502	0.0829569	0.0688645
Thermus_oshimai	0	0.0158927	0.00892578	0	0	0.0121499	0	0	0	0	0	0	0	0	0	0	0.0186214	0	0.00652695	0.0179788	0	0	0.017056	0	0.00625271	0	0	0	0.0202202	0	0.0126288	0.0187745	0	0.00307712	0.0080005	0.0107987	0.0227169	0.0083874	0	0.0103517	0	0.00827706	0	0	0	0.00493542	0.0293664	0
Thermus_scotoductus	0	0	0	0	0	0	0	0	0	0	0	0	0	0	0	0	0	0	0	0	0	0	0	0	0	0	0	0	0	0	0.000461518	0.00427033	0	0	0	0	0	0	0	0	0	0	0	0	0	0	0.000764971	0
Thermus_thermophilus	0	0.00986234	0	0	0	0.0041547	0	0	0	0	0	0	0	0	0	0	0	0.00281828	0	0	0	0	0	0	0	0	0	0	0.0137063	0	0.00889472	0.0133654	0.00341488	0	0.0142776	0.0153391	0	0.00190833	0	0	0	0	0	0	0	0	0.0169781	0
Thermus_unclassified	0.0641064	0.0794514	0.112528	0.0544219	0.118946	0.0991367	0.133328	0.0793443	0.106391	0.0882877	0.0787816	0.1228	0.056972	0.145191	0.0506027	0.0454057	0.0817013	0.118504	0.10612	0.124467	0.111846	0.0984316	0.104129	0.0721118	0.0719543	0.105142	0.0538463	0.129989	0.0990653	0.0181136	0.0605009	0.0381183	0.0581581	0.0756216	0.0836574	0.143013	0.0879573	0.154821	0.0594144	0.190184	0.111924	0.151065	0.0705381	0.0735979	0.0966918	0.0983106	0.0929653	0.102781
Dictyoglomus_unclassified	0	0.0042004	0.0197464	0.00581325	0.0222371	0.0128831	0	0.0217308	0	0.0135382	0	0.00201761	0	0	0.0171945	0.0190718	0.0148195	0.00787411	0.0187984	0.0131699	0	0.0149093	0.0248944	0.0190467	0.0357206	0	0.00609788	0	0.0120024	0	0.0146008	0.0116273	0.0259356	0.00370125	0.0298359	0.00198094	0.0078817	0	0	0.00220816	0.0315735	0.021122	0	0	0	0	0.0245003	0.00778232
Fibrobacter_succinogenes	0	0.00774986	0.00219404	0	0	0.00385794	0	0	0	0	0	0	0	0	0	0	0	0	0.0130951	0	0	0.00326908	0	0	0.00775978	0	0	0	0.00598614	0	0.0046991	0.00558889	0	0.001974	0.00409512	0	0	0.00106189	0	0	0	0.00522039	0	0	0	0	0.0103059	0.0366674
Alicyclobacillus_acidocaldarius	0	0.0116678	0.00942442	0	0.00306776	0.00446892	0	0	0	0	0	0	0	0	0	0	0	0.00225463	0.0151335	0	0	0.00461073	0	0	0.00687798	0	0	0	0.00767493	0	0.00620952	0.0114774	0	0	0.00812699	0.0108864	0	0	0	0.0146428	0	0	0	0	0	0.00204783	0.0163406	0
Alicyclobacillus_unclassified	0	0.00747966	0.0162393	0	0.0463481	0.0136512	0.128584	0	0.0622473	0	0	0.226854	0	0.153342	0.0672456	0.142389	0.139425	0.0338365	0.0788793	0.0426973	0	0.107974	0.0410769	0	0	0.120078	0.0450522	0.117939	0.0479193	0.0735071	4.19562e-05	0.0707376	0.0655658	0.0436748	0.128261	0.0116227	0.0300952	0.0742093	0	0.0337019	0.145955	0.319285	0.128845	0	0.0647887	0.232525	0	0
Anoxybacillus_flavithermus	0	0	0	0	0	0	0	0	0	0	0	0	0	0	0	0	0	0	0	0	0	0	0	0	0	0	0	0	0	0	0.00209781	0.000779148	0	0	0.00142301	0	0	0	0	0	0	0	0	0	0	0	0	0
Anoxybacillus_unclassified	0	0	0	0	0	0	0	0	0	0	0	0	0	0	0	0	0	0	0	0	0	0	0	0	0	0	0	0	0	0	0	0.000809115	0	0	0	0	0	0	0	0	0	0	0	0	0	0	0	0
Bacillus_amyloliquefaciens	0	0	0	0	0	0	0	0	0	0	0	0	0	0	0	0	0	0	0	0	0	0	0	0	0	0	0	0	0	0	0.00180412	0	0	0	0	0	0	0	0	0	0	0	0	0	0	0	0.000743722	0
Bacillus_anthracis	0	0.00408986	0	0	0	0	0	0	0	0	0	0	0	0	0	0	0	0	0.0204044	0	0	0	0.00360888	0.0230997	0	0	0	0	0	0	0.00719549	0.000958951	0	0	0.0112734	0	0	0	0	0	0.0335797	0.00654266	0	0	0	0	0.0271352	0
Bacillus_cereus_thuringiensis	0	0.0275359	0.0339911	0.0535252	0.0155378	0.0284719	0.0385804	0.0160596	0	0.0139402	0	0	0	0.070226	0	0.0663568	0.0322753	0.0569122	0.0197661	0.0542642	0	0.0620181	0.0412378	0.0132663	0.0362497	0.0272293	0.00735194	0	0.0340471	0	0.0044054	0.0273601	0.00696987	0.0383479	0.0100243	0.007205	0.0280972	0.00775642	0	0.0151283	0.089454	0.0750087	0	0.0127166	0	0.0215096	0.00384611	0.0578968
Bacillus_coagulans	0	0	0	0	0	0	0	0	0	0	0	0	0	0	0	0	0	0	0	0	0	0	0	0	0	0	0	0	0	0	0.00383899	0.00281692	0	0	0.00290927	0	0	0	0	0	0	0	0	0	0	0	0.000743722	0
Bacillus_licheniformis	0	0	0	0	0	0	0	0	0	0	0	0	0	0	0	0	0	0	0	0	0	0	0	0	0	0	0	0	0	0	0.00383899	0.00119869	0	0	0	0	0	0	0	0	0	0	0	0	0	0	0.000743722	0
Bacillus_megaterium	0	0	0	0	0	0	0	0	0	0	0	0	0	0	0	0	0	0	0	0	0	0	0	0	0	0	0	0	0	0	0	0	0	0	0	0	0	0	0	0	0	0	0	0	0	0	0.00269865	0
Bacillus_methanolicus	0	0	0	0	0	0	0	0	0	0	0	0	0	0	0	0	0.00649392	0	0	0	0	0	0	0.00724218	0.00275761	0	0	0	0	0	0.0011538	0.003656	0	0	0.00537583	0	0	0	0	0	0	0	0	0	0	0	0.0124308	0
Bacillus_mycoides	0	0	0	0	0	0	0	0	0	0	0	0	0	0	0	0	0	0	0	0	0	0	0	0	0.00471358	0	0	0	0	0	0	0.00275698	0	0	0.00428485	0	0	0	0	0	0	0	0	0	0	0	0.00890342	0
Geobacillus_kaustophilus	0	0.0116064	0.0208933	0	0.0131831	0.00722708	0	0.00672803	0	0.0119303	0	0.012282	0	0.0108752	0	0	0	0.0193693	0.0170483	0	0.00691423	0	0.00551676	0.0157246	0.015744	0	0	0	0.00912246	0.0100774	0.013384	0.00386577	0.00609426	0.00866528	0.023796	0.0119908	0.0160623	0.0135737	0	0.00651486	0	0.00540928	0	0.0528468	0.00429495	0	0.0488519	0.0119631
Geobacillus_thermoglucosidasius	0	0	0	0	0	0	0	0	0	0	0	0	0	0	0	0	0	0	0	0	0	0	0	0	0.00564347	0	0	0	0	0	0.0033565	0.00269705	0	0	0.00381052	0	0	0	0	0	0	0	0	0	0	0	0.00478107	0
Geobacillus_unclassified	0.0909554	0.0565826	0.110633	0.129453	0.124468	0.135918	0.150464	0.178641	0.0774246	0.0542171	0.147037	0.0773353	0.139808	0.199204	0.0178075	0.0698138	0.0864746	0.10964	0.0985425	0.110004	0.00665641	0.154592	0.156032	0.0688561	0.147564	0.178312	0.0792254	0.117559	0.0910889	0.083606	0.033502	0.0320799	0.0768612	0.0844466	0.0418524	0.0727337	0.0531268	0.0250545	0.0494948	0.0674821	0.11067	0.185358	0.0689009	0.0551242	0.155411	0.158994	0.0816607	0.0466939
Gracilibacillus_unclassified	0.128449	0	0	0	0	0	0.158545	0.110458	0	0.28964	0	0.105425	0	0	0	0	0	0	0.420504	0.105268	0	0.277627	0.286297	0.27651	0.203614	0.0697421	0	0	0	0	0	0.0243034	0.0484388	0.0967986	0.122648	0	0.0699285	0.0548182	0	0	0.533966	0.196829	0	0	0	0	0.318823	0
Halobacillus_unclassified	0.119243	0.0473343	0.0192145	0	0	0.012918	0	0	0	0.0937865	0	0	0	0	0.0479975	0.0995584	0	0	0.0931686	0	0.0365165	0	0.0292159	0	0	0.0424977	0.0170709	0	0.0205821	0	0.0663747	0.0241686	0	0.0161694	0.0630553	0.0178284	0	0	0.0253819	0	0	0.143183	0	0	0	0.071733	0	0
Lysinibacillus_fusiformis	0	0	0	0	0	0	0	0	0	0	0	0	0	0	0	0	0	0	0	0	0	0	0	0	0.00745516	0	0	0	0	0	0.00593681	0.00145341	0	0	0.00407931	0	0	0	0	0	0	0	0	0	0	0	0.00444108	0
Lysinibacillus_sphaericus	0	0.0104764	0	0.0545611	0.0234477	0.0204069	0	0.0191272	0	0	0	0.01761	0.0131951	0	0.0155701	0	0	0	0.00774174	0.0200371	0.00967992	0.00808768	0.0169411	0.0333982	0.0105494	0.0417124	0.0938039	0	0	0	0.00753114	0.00497456	0.027967	0.00422378	0.00213452	0.0329396	0.00591521	0	0	0.0289724	0.0361879	0.00973671	0	0.0369899	0	0	0.0151294	0.0170306
Oceanobacillus_unclassified	0	0	0	0	0	0	0	0	0	0	0	0	0	0	0	0	0	0	0	0	0	0	0	0	0.0013788	0	0	0	0	0	0.0044054	0.00266708	0	0	0.00241912	0	0	0	0	0	0	0	0	0	0	0	0.00866968	0
Exiguobacterium_unclassified	0	0.0824482	0.172432	0.248934	0.107438	0.158682	0.135223	0.0336401	0.0872738	0.0907316	0.106164	0.100841	0.038138	0.161258	0.0480282	0.0953125	0.0966595	0.181275	0.284056	0.0632081	0.216708	0.177041	0	0.170823	0.221779	0.0805553	0.153717	0.0817648	0.0498795	0.311476	0.119848	0.126836	0.0158486	0.145583	0.030911	0.0629868	0.0908048	0.106528	0.0230898	0.250713	0.102344	0.143217	0.627759	0.254785	0.134934	0.145204	0.196938	0.11849
Gemella_haemolysans	0	0.0117906	0.0197132	0	0.0202804	0.0205815	0	0.0570207	0	0.011255	0	0.00244856	0.00293224	0.0199893	0.0174704	0.0444312	0.0664933	0.00949675	0.0272402	0.017487	0.0159379	0.0469954	0.0395828	0.02465	0.0332516	0	0.0144374	0	0.00221653	0	0.0218382	0.0129758	0.0206644	0.00451407	0.0352433	0.00694204	0.0122709	0	0	0.0270931	0.0412537	0.0228735	0	0.0120942	0.0117596	0	0.0433484	0
Gemella_unclassified	0.0316984	0.0132644	0.0395593	0.0321739	0.0848361	0.0210354	0.0100448	0.0355993	0.00667874	0.0625136	0.0240939	0.0713804	0.0121425	0.00775246	0.0879341	0.215172	0.0244216	0.0509169	0.0522156	0.0511312	0.0183754	0.0309524	0.066454	0.0387579	0.0867203	0.0165822	0.0232002	0.0125719	0.0181092	0.0509887	0.00281107	0.00936476	0.0597693	0.0174902	0.00256143	0.0436682	0.039676	0.0273014	0.0254985	0.0900179	0.0931405	0.0283	0.0373076	0.0381781	0.0404454	0.0245592	0.0278365	0.0559241
Listeria_fleischmannii	0	0	0	0	0	0.00111723	0	0	0	0	0	0	0	0	0	0	0	0	0	0	0	0	0	0	0	0	0	0	0	0	0.00369215	0.00101889	0	0	0.00376308	0	0	0	0	0	0	0	0	0	0	0	0.0041011	0
Listeria_innocua	0	0.00137557	0	0	0	0	0	0	0	0	0	0	0	0	0	0	0	0	0	0	0	0	0	0	0	0	0	0	0	0	0.00266422	0.00633807	0	0	0	0	0	0	0	0	0	0	0	0	0	0	0.0106034	0
Listeria_ivanovii	0	0	0	0	0	0.00312475	0	0.00286134	0	0	0	0	0	0	0	0	0.00585563	0	0	0	0	0	0	0	0.00657336	0	0	0	0	0	0.00715354	0.00683253	0.0158311	0	0.0103722	0	0	0	0	0	0	0	0	0	0	0	0.0207817	0
Listeria_monocytogenes	0	0.00346349	0.00149594	0	0	0.00211226	0	0	0	0	0	0	0	0	0	0	0	0	0	0	0	0.00869236	0.00951641	0.0134656	0	0	0	0	0	0	0.0048879	0.00248728	0	0	0.00905986	0	0	0	0	0	0	0	0	0	0	0	0.00875467	0
Listeria_seeligeri	0	0.00106852	0	0	0	0	0	0	0	0	0	0	0	0	0	0	0	0	0	0	0	0	0	0	0	0	0	0	0.00452353	0	0.00513964	0.00449508	0.00483338	0	0.00977136	0.00122713	0	0	0	0	0	0	0	0	0	0	0.0123883	0
Listeria_unclassified	0.0281698	0.0297221	0.0729354	0.0153989	0.186371	0.0377938	0.0301692	0.293842	0.0300543	0.10673	0	0	0.0523669	0	0.0625868	0.103804	0.062386	0.052847	0.083059	0.0391453	0	0.155461	0.113576	0	0.0744233	0.0147549	0.0434533	0	0.0252413	0.0335842	0	0	0.0716601	0	0.0841318	0.0455089	0.0711556	0	0.0787617	0.0229117	0.0735544	0.0193876	0.0601644	0.0955655	0.0329808	0.0160143	0.039566	0.0444497
Paenibacillus_alvei	0	0	0	0	0	0	0	0	0	0	0	0	0	0	0	0	0	0	0	0	0	0	0	0	0	0	0	0	0	0	0.00157336	0	0	0	0	0	0	0	0	0	0	0	0	0	0	0	0	0
Paenibacillus_mucilaginosus	0	0.00464254	0	0	0	0	0	0	0	0	0	0	0	0	0	0	0	0	0	0	0	0	0	0	0	0	0	0	0.000859471	0	0.00297889	0.00452505	0	0	0.00452202	0	0	0	0	0	0	0	0	0	0	0	0.00815969	0
Paenibacillus_polymyxa	0	0	0	0	0	0	0	0	0	0	0	0	0	0	0	0	0	0	0	0	0	0	0	0	0	0	0	0	0	0	0.00111184	0.00197784	0	0	0	0	0	0	0	0	0	0	0	0	0	0	0.00116871	0
Kurthia_unclassified	0	0.0019651	0	0	0	0	0	0	0	0	0	0.0155532	0	0	0	0.018747	0	0	0	0	0	0	0.00275838	0	0	0	0	0	0.00376961	0	0.00742625	0.0323197	0	0	0.00942352	0	0	0	0	0	0	0	0	0	0	0	0.0118571	0
Paenisporosarcina_unclassified	0	0	0	0	0	0	0	0	0	0	0	0	0	0	0	0	0	0	0	0	0	0	0	0	0	0	0	0	0	0	0.00423758	0.00197784	0	0	0.00366821	0	0	0	0	0	0	0	0	0	0	0	0.00747972	0
Planococcus_unclassified	0	0.00100711	0	0	0	0	0	0	0	0	0	0	0	0	0	0	0	0	0	0	0	0	0	0	0.00235679	0	0	0	0	0	0.00381802	0.00233744	0	0	0.000363659	0	0	0	0	0	0	0	0	0	0	0	0.00354862	0
Sporolactobacillus_unclassified	0.126498	0.11911	0.0433656	0.047109	0.138862	0.08875	0.122432	0.0359601	0.0280657	0.102324	0.127092	0.0880306	0.105805	0.0964064	0.0306804	0.141461	0.0536164	0.0658624	0.143243	0.0670698	0.055642	0.0931406	0.0191937	0.0885008	0.0618538	0.160763	0.086499	0.0730356	0.0136761	0.0179417	0.0323063	0.025577	0.0356374	0.0969873	0.00567625	0.0157072	0.0420829	0.0379972	0.0422687	0.043114	0.0494041	0.036474	0.0282719	0.0452225	0.0371806	0.0569267	0.0129408	0.10041
Sporolactobacillus_vineae	0	0	0	0	0	0	0	0	0	0	0	0	0	0	0	0	0	0	0	0	0	0	0	0	0	0	0	0	0.00330218	0	0.00346139	0.00229249	0	0	0	0	0	0	0	0	0	0	0	0	0	0	0.00335738	0
Salinicoccus_unclassified	0.0400172	0.0417338	0.0858836	0.113188	0.0829457	0.114568	0	0.112417	0	0.132247	0.213096	0.0603521	0	0.0259262	0	0.181878	0.0385195	0.0854195	0.0849327	0.0447557	0.0362352	0.0868102	0.0599948	0.0960088	0.11792	0.0525557	0.0391894	0	0.0333535	0	0.0780176	0.0670966	0.0568097	0.0158065	0.0431173	0.168239	0.0452293	0.0657141	0.138228	0.0954365	0.146632	0.0817403	0	0.11684	0.0862635	0.0124785	0.0589878	0.0308035
Staphylococcus_aureus	0	0	0	0	0	0.0012918	0	0	0	0.0030067	0	0	0	0	0	0.0192574	0	0	0.00430326	0	0	0.012774	0.00884981	0	0.0331554	0	0	0	0	0	0.00492986	0.00445013	0.00304713	0	0.00850646	0	0	0	0	0	0	0.00281626	0	0	0	0	0.0194005	0
Staphylococcus_caprae_capitis	0	0	0	0	0	0	0	0	0	0	0	0	0	0	0	0	0	0	0	0	0	0	0	0	0	0	0	0	0	0	0.00667104	0.00113875	0	0	0.00943933	0	0	0	0	0	0	0	0	0	0	0	0.0102209	0
Staphylococcus_epidermidis	0	0.00423724	0	0	0	0	0	0	0	0	0	0	0	0	0	0.0212991	0	0	0.00689756	0	0	0	0.0125047	0	0.0234397	0	0	0	0	0	0.0089157	0.00738692	0.0032923	0	0	0	0	0	0	0	0	0	0	0	0	0	0.00652351	0
Staphylococcus_equorum	0	0.00208792	0	0	0	0	0	0	0	0	0	0	0	0	0	0	0	0	0	0	0	0.00272109	0	0	0	0	0	0	0	0	0.00258031	0	0.00318723	0	0.00866458	0	0	0	0	0	0	0	0	0	0	0	0.0121333	0
Staphylococcus_haemolyticus	0	0	0	0	0	0	0	0	0	0	0	0	0	0	0	0	0	0	0	0	0	0	0	0	0	0	0	0	0	0	0.000461518	0.00086905	0	0	0.00311482	0	0	0	0	0	0	0	0	0	0	0	0.00741597	0
Staphylococcus_hominis	0	0	0.00437147	0	0	0	0	0.0161627	0	0	0	0	0	0	0	0	0	0	0.00788587	0	0	0.0314815	0	0	0.0094913	0	0	0	0	0	0.00696473	0.00492961	0	0	0.0346741	0	0	0	0	0.0277978	0	0	0	0	0	0	0.0247978	0
Staphylococcus_lugdunensis	0	0	0	0	0.0199985	0.00375319	0	0	0	0	0	0	0	0	0	0	0	0	0	0	0	0	0.0231474	0	0	0	0	0	0	0	0.00763603	0.00239738	0	0	0.00964487	0	0	0	0	0.00341404	0	0.00542646	0	0	0	0	0.0118783	0
Staphylococcus_massiliensis	0	0	0	0	0	0	0	0	0	0	0	0	0	0	0	0	0	0	0	0	0	0	0	0	0	0	0	0	0	0	0	0	0	0	0.000395282	0	0	0	0	0	0	0	0	0	0	0	0	0
Staphylococcus_pseudintermedius	0	0	0	0	0	0	0	0	0	0	0	0	0	0	0	0	0	0	0	0	0	0	0	0	0	0	0	0	0	0	0.00543333	0	0	0	0.00567625	0	0	0	0	0	0	0	0	0	0	0	0.00701224	0
Staphylococcus_saprophyticus	0	0	0	0	0	0	0	0	0	0	0	0	0	0	0	0	0	0	0	0	0	0	0	0	0	0	0	0	0	0	0.00180412	0	0	0	0.00314644	0	0	0	0	0	0	0	0	0	0	0	0.0102846	0
Staphylococcus_simulans	0	0	0	0	0	0	0	0	0	0	0	0	0	0	0	0	0	0	0.00430326	0	0	0.00513983	0	0	0	0	0	0	0	0	0.00474105	0.00259217	0	0	0.00605572	0.00452285	0	0	0	0	0	0	0	0	0	0	0.00580103	0
Staphylococcus_warneri	0	0	0.00209432	0	0	0	0	0	0	0.00344082	0	0	0	0	0	0	0	0	0	0	0	0.00612245	0	0.00316707	0.00884999	0	0	0	0	0	0.0070906	0.00596348	0	0	0.00637194	0.0107637	0	0	0	0	0	0	0	0	0	0	0.0185931	0
Aerococcus_viridans	0	0	0	0	0	0	0	0	0	0	0	0	0	0	0	0	0	0	0	0	0	0	0	0	0	0	0	0	0	0	0.00295791	0	0	0	0	0	0	0	0	0	0	0	0	0	0	0	0.0026349	0
Facklamia_hominis	0	0	0	0	0	0	0	0	0	0	0	0	0	0	0	0	0	0	0	0	0	0	0	0	0	0	0	0	0	0	0.00165727	0.00203777	0	0	0.00577111	0	0	0	0	0	0	0	0	0	0	0	0.00571604	0
Facklamia_unclassified	0.0293131	0.0258533	0.0085601	0.0580552	0.0255039	0.0158856	0.0311424	0.100792	0.0154024	0.063816	0.0934254	0.0340448	0.0282698	0	0.0769922	0	0.0520901	0.057715	0.0905331	0.0672155	0.0727518	0.0607143	0.0263425	0.0513376	0.015263	0.0501243	0.0658226	0	0.0511762	0.0938983	0.00818146	0.0148188	0.0160062	0.0228316	0.0347057	0.0277506	0.0255959	0.0544796	0.0290856	0.014173	0.143824	0.0119176	0.0161194	0.0109626	0.0172907	0.0340912	0	0.043219
Carnobacterium_maltaromaticum	0	0	0	0	0	0	0	0	0	0	0	0	0	0	0	0	0.00416277	0	0	0	0	0.00230537	0	0.00245836	0.00973179	0	0	0	0	0	0.00534942	0.0010039	0	0	0.0053284	0	0	0	0	0	0	0	0	0	0	0	0.0148957	0
Granulicatella_unclassified	0	0.0215301	0.0392934	0.00935377	0	0	0	0.0281237	0	0.0106119	0	0.059784	0.0150559	0	0	0.0175173	0.0671316	0	0.0438767	0.0335713	0.0290163	0.0209562	0	0.0336861	0.019656	0.0576603	0.00594112	0	0.00705671	0	0.0151042	0.0113875	0.0233963	0.00624132	0.0298675	0.0184245	0.0732322	0.0138046	0.0478242	0.0256366	0.0577552	0.0339325	0	0.0522244	0.0251833	0	0.0249041	0.0586751
Enterococcus_asini	0	0	0	0	0	0	0	0	0	0	0	0	0	0	0	0	0	0	0	0	0	0	0	0	0	0	0	0	0	0	0.00253835	0.00202279	0	0	0.000411093	0	0	0	0	0	0	0	0	0	0	0	0	0
Enterococcus_avium	0	0	0	0	0	0	0	0	0	0	0	0	0	0	0	0	0	0	0	0	0	0	0	0	0	0	0	0	0	0	0.000692278	0.00214266	0	0	0.00422161	0	0	0	0	0	0	0	0	0	0	0	0.0027199	0
Enterococcus_caccae	0	0	0.00610011	0	0	0	0	0.019617	0	0	0	0	0	0	0	0	0.0207583	0	0	0	0	0	0.0145734	0	0.00405625	0	0.00130109	0	0	0	0.00683887	0.00424036	0	0	0.0108465	0	0	0	0	0.0029129	0	0.00252433	0	0	0	0	0.0151294	0
Enterococcus_casseliflavus	0	0	0	0	0	0	0	0	0	0	0	0.0377274	0	0	0	0	0	0.00374063	0	0	0	0	0	0	0	0	0	0	0	0	0	0.0153882	0	0	0.0113999	0	0	0	0	0	0	0	0	0	0	0	0.0054398	0
Enterococcus_cecorum	0	0.00114221	0	0	0	0	0	0	0	0	0	0	0	0	0	0	0	0	0	0	0	0	0	0	0.00134674	0	0	0	0	0	0.00499279	0.024648	0	0	0.00433229	0	0	0	0	0	0	0	0	0	0	0	0.00337862	0
Enterococcus_columbae	0	0.00183	0	0	0	0	0	0	0	0	0	0	0	0	0	0.0137586	0	0	0	0	0	0	0	0	0	0	0	0	0	0	0.00558018	0.00275698	0	0	0.00175505	0	0	0	0	0	0	0	0	0	0	0	0.00779846	0
Enterococcus_dispar	0	0.000663221	0	0	0	0	0	0	0	0	0	0	0	0	0	0	0	0	0	0	0	0	0	0	0	0	0	0	0	0	0.00497181	0.00305666	0	0	0.00646681	0	0	0	0	0	0	0	0	0	0	0	0.00458983	0
Enterococcus_durans	0	0.00289852	0	0	0	0	0	0	0	0	0	0	0	0	0	0	0	0	0	0	0	0	0	0.00239191	0	0	0	0	0	0	0.00589485	0	0	0	0.00199222	0	0	0	0	0	0	0	0	0	0	0	0.00890342	0
Enterococcus_faecalis	0	0.0121468	0	0	0	0	0	0	0	0	0	0	0	0	0	0	0	0.0145013	0	0	0	0	0	0	0.00662146	0	0	0	0	0	0.0042166	0.00404558	0	0	0.00498055	0.00266462	0	0	0	0	0	0	0	0	0	0	0.0111133	0
Enterococcus_faecium	0	0.00566194	0	0	0	0	0	0	0	0	0	0	0	0	0	0	0	0	0	0	0	0	0	0	0.0111747	0	0	0	0	0	0.00390193	0.00440518	0	0	0.00483825	0	0.00490836	0	0	0.00790867	0	0	0	0	0	0	0.0106034	0
Enterococcus_gilvus	0	0	0	0	0	0	0	0	0	0	0	0	0	0	0	0	0	0	0	0	0	0	0	0	0	0	0	0	0	0	0	0	0	0	0.0012649	0	0	0	0	0	0	0	0	0	0	0	0.00116871	0
Enterococcus_haemoperoxidus	0	0.00111765	0.00309161	0	0	0	0	0	0	0.00725145	0	0	0	0	0	0	0.018677	0	0.00170895	0	0	0.00825774	0	0.0159239	0.0238244	0	0	0	0	0	0.0035453	0.00954456	0.00614679	0.00249653	0.00942352	0.00262956	0	0	0	0	0	0	0	0	0	0	0.0183806	0
Enterococcus_hirae	0	0	0	0	0	0	0	0	0	0	0	0	0	0	0	0	0	0	0.0168836	0	0	0	0	0.00972269	0	0	0	0	0	0	0.000734234	0.00367098	0	0	0.00456946	0	1.96651	0	0	0	0	0	0	0	0	0	0.00597103	0
Enterococcus_malodoratus	0	0	0	0	0	0	0	0	0	0	0	0	0	0	0	0	0	0	0	0	0	0	0	0	0	0	0	0	0	0	0.000713256	0	0	0	0.000822186	0	0	0	0	0	0	0	0	0	0	0	0.00688474	0
Enterococcus_moraviensis	0	0.00342664	0	0	0	0	0	0	0	0	0	0	0	0	0	0	0	0	0	0	0	0	0.00740166	0	0.00397608	0	0	0	0	0	0.00396486	0.00289184	0.00260932	0	0.00471176	0	0	0	0	0	0	0	0	0	0	0	0.00792595	0
Enterococcus_mundtii	0	0	0	0	0	0	0	0	0	0	0	0	0	0	0	0	0	0	0	0	0	0	0	0	0	0.240473	0	0	0	0	0.000398584	0	0	0	0	0	0	0	0	0	0	0	0	0	0	0	0.00314488	0
Enterococcus_pallens	0	0	0	0	0	0	0	0	0	0	0	0	0	0	0	0	0	0	0	0	0	0	0	0	0	0	0	0	0	0	0.00243346	0.000629312	0	0	0.0015495	0	0	0	0	0	0	0	0	0	0	0	0	0
Enterococcus_phoeniculicola	0	0.00496187	0	0	0	0.00321204	0	0	0	0.00252434	0	0	0	0	0	0.0125753	0.00818678	0	0.0108096	0	0	0	0.00478119	0.00478383	0.0157119	0	0	0	0	0	0.00455225	0.00662276	0.00385269	0	0.0157638	0	0	0	0	0	0	0.00467087	0	0.00466794	0	0	0.0183381	0
Enterococcus_raffinosus	0	0	0	0	0	0	0	0	0	0	0	0	0	0	0	0	0	0	0	0	0	0	0	0	0	0	0	0	0	0	0	0	0	0	0.00132815	0	0	0	0	0	0	0	0	0	0	0	0	0
Enterococcus_saccharolyticus	0	0.000638657	0	0	0	0	0	0	0	0	0	0	0	0	0	0	0	0	0	0	0	0	0	0	0	0	0	0	0	0	0.00320965	0.00497456	0	0	0.00398444	0	0	0	0	0	0	0	0	0	0	0	0.00875467	0
Enterococcus_sulfureus	0	0	0	0	0	0	0	0	0	0	0	0	0	0	0	0	0	0	0	0	0	0	0	0	0	0	0	0	0	0	0.00409073	0.00101889	0	0	0	0	0	0	0	0	0	0	0	0	0	0	0	0
Enterococcus_villorum	0	0.00563738	0.00483687	0	0	0.00450384	0	0.00317068	0	0.00520947	0	0	0	0	0	0	0.0107122	0	0.011942	0	0	0	0	0	0.0204897	0	0.00141082	0	0	0	0.00950308	0.00693741	0.0114705	0	0.0152104	0.00134984	0.0366082	0	0	0.00602938	0	0	0	0	0	0	0.0166806	0
Lactobacillus_acidophilus	0	0.0033898	0.0160398	0	0	0	0	0	0	0	0	0	0	0	0.0144054	0	0	0	0	0	0	0.015136	0.0116082	0	0.0187742	0	0	0	0	0	0.0129855	0.00876541	0	0	0.00430067	0	0	0	0	0.00704733	0.0103824	0	0	0	0	0	0.0130045	0
Lactobacillus_amylovorus	0	0.00544087	0.00671511	0.014966	0	0	0	0.0117805	0	0.0316749	0	0	0	0	0	0.0339672	0	0.0458099	0	0	0.0115784	0	0.0639025	0.0182051	0.00606032	0	0	0	0.00625755	0	0.0015314	0	0.00537626	0.0142244	0.00948676	0.0272773	0.0071895	0	0.0143486	0.0111661	0.0972032	0.0176875	0	0.0179645	0.0210468	0	0.0169144	0
Lactobacillus_casei_paracasei	0	0	0	0	0	0	0	0	0	0	0	0	0	0	0	0	0	0	0	0	0	0	0	0	0	0	0	0	0	0	0	0.00151334	0	0	0	0	0	0	0	0	0	0	0	0	0	0	0	0
Lactobacillus_crispatus	0	0	0	0	0	0	0	0	0	0	0	0	0	0	0	0	0	0	0	0	0	0	0	0	0	0	0	0	0	0	0	0	0	0	0.00158113	0	0	0	0	0	0	0	0	0	0	0	0.00146619	0
Lactobacillus_delbrueckii	0	0.00476536	0	0	0	0	0	0	0	0	0	0	0	0	0	0	0	0	0	0	0	0	0	0	0	0	0	0	0.00295537	0	0.00472007	0.00767161	0	0	0.00390538	0	0	0	0	0	0	0	0	0	0	0	0.0144495	0
Lactobacillus_fermentum	0	0	0	0	0	0	0	0	0	0	0	0	0	0	0	0	0	0	0	0	0	0	0	0	0	0	0	0	0	0	0.000713256	0	0	0	0	0	0	0	0	0	0	0	0	0	0	0	0.00227366	0
Lactobacillus_gasseri	0	0.0171946	0.0138458	0	0	0.00354371	0	0.0165494	0	0.00577222	0	0.0227226	0	0	0	0	0	0	0	0	0	0.0146258	0	0.00520463	0.00448913	0	0	0	0.00180941	0	0.00790875	0.00729702	0.001436	0	0.0166967	0	0	0	0	0	0.152827	0.0105782	0	0	0	0	0.0225879	0
Lactobacillus_helveticus	0	0	0	0	0	0	0	0	0	0	0	0	0	0	0	0	0	0	0	0	0	0	0	0	0	0	0	0	0	0	0	0.00133354	0	0	0.00776333	0	0	0	0	0	0	0	0	0	0	0	0	0
Lactobacillus_iners	0	0.00422496	0.00147932	0	0	0.00197261	0	0.0055938	0	0	0	0	0	0	0	0.0241761	0.011517	0	0.00860651	0	0	0.0167989	0	0	0.0138682	0	0.00264921	0	0.00542824	0	0.0119785	0.0061283	0.00485089	0	0.0203491	0.00378657	0	0	0	0.00277195	0.0123636	0.00669721	0	0	0	0	0.0280065	0
Lactobacillus_jensenii	0	0.0079218	0.00490336	0	0	0.00115214	0	0.0219112	0	0.00271729	0	0	0	0	0	0.0398373	0.010962	0	0.0178925	0	0	0	0.0181593	0	0.0272233	0	0	0	0.000889628	0	0.00646126	0.00569377	0.00140098	0	0.0119059	0.00425989	0	0	0	0	0.0364136	0.00252433	0	0	0	0	0.0228854	0
Lactobacillus_johnsonii	0.017919	0.0136206	0.0175524	0	0.0184895	0.0055687	0	0.0269637	0	0	0	0.00844263	0	0	0	0	0	0	0.00772115	0	0	0.0255291	0.0273999	0	0.016738	0.00557272	0	0	0.00441798	0	0.0135938	0.00771656	0.018668	0	0.0113683	0.00953654	0	0	0	0.0147367	0.0917111	0.00497998	0	0.00497914	0	0	0.0225667	0
Lactobacillus_mali	0	0.0022353	0	0	0	0	0	0.0089707	0	0	0	0	0	0	0	0	0	0	0	0	0	0	0	0	0	0	0	0	0	0	0.00356628	0.00253223	0	0	0.00202384	0	0	0	0	0	0	0	0	0	0	0	0.00505731	0
Lactobacillus_mucosae	0	0.519879	0	0	0	0	0	0	0	0	0	0	0	0	0	0	0	0	0	0	0	0	0	0	0	0	0	0	0	0	0	0	0	0	0	0	0	0	0	0	0	0	0	0	0	0	0	0
Lactobacillus_oris	0	0	0	0	0	0	0	0	0	0	0	0	0	0	0	0	0	0	0	0	0	0	0	0	0	0	0	0	0	0	0.000377606	0	0	0	0	0	0	0	0	0	0	0	0	0	0	0	0	0
Lactobacillus_reuteri	0	0	0.492463	0	0	0.0268659	0	0.0327637	0	0	0	0	0	0	0	0	0	0	0	0.184834	0	0	0	0	0	0	0	0	0	0	0	0	0	0	0.000426904	0	0	0	0	0	0	0	0	0	0	0	0.00352737	0
Lactobacillus_ruminis	0.338155	0.567078	0.844824	0	0.342578	0.0262025	0.168659	0.123811	0.0408416	0.115943	0.131426	0.221781	0	0.148658	0.337025	0.13102	0	0.1596	0.0142687	1.42869	0.0605405	0.0214853	0.0496968	0.196558	0.0104853	0.093075	0.255844	0.339133	0.624323	0.533179	0.768722	0.114505	0.212458	0.280772	0.0554659	0.00454038	0.161646	0.700325	0	0.407383	0	0.644993	0	0.199944	0.0353105	0.178868	0.0150657	0.113242
Lactobacillus_salivarius	0.00388345	0.00254235	0	0	0	0	0	0.0327121	0	0	0	0	0	0	0	0.019327	0.0245326	0	0.0326347	0	0	0	0.00560871	0.00267983	0.0145416	0	0	0	0	0	0.00318867	0.0178755	0.011523	0	0.0107517	0	0	0	0	0.0130611	0.00481502	0.00791644	0	0	0	0	0.0187418	0
Pediococcus_pentosaceus	0	0	0	0	0	0	0	0	0	0	0	0	0	0	0	0	0	0	0	0	0	0	0	0	0	0	0	0	0	0	0.00606268	0	0	0	0.00208709	0	0	0	0	0	0	0	0	0	0	0	0.00233741	0
Pediococcus_unclassified	0.0728392	0.0875451	0	0.0337354	0.0489018	0.0544824	0	0.0498029	0.203214	0.0877892	0.0628163	0.110479	0	0	0	0.216216	0.10282	0	0	0	0.127808	0.0378118	0.122541	0.0498537	0.303401	0.0591252	0.0289845	0.0973966	0.0698735	0	0.101115	0.0467039	0	0	0.0163963	0.314145	0.0756549	0.0301177	0.0666923	0	0.155159	0.197945	0	0	0.247918	0	0.0382911	0
Leuconostoc_gelidum	0	0.00480221	0	0	0	0.00144891	0	0	0	0	0	0	0	0	0	0.0219952	0.00799251	0.0188739	0	0	0	0	0.00333304	0.00622341	0.00190788	0	0	0	0	0	0.00262226	0.00151334	0.0018563	0	0.0012649	0.00185822	0.00240699	0	0	0.00402481	0	0	0	0	0	0	0.0052698	0
Leuconostoc_lactis	0	0.00631288	0	0	0	0.00202498	0	0	0	0	0	0	0	0	0	0	0	0	0	0	0	0	0	0	0.0121206	0	0	0	0.00313632	0	0.00142651	0.00271203	0	0.00734444	0	0	0	0	0	0	0	0	0	0	0	0	0.0108583	0
Leuconostoc_mesenteroides	0	0	0	0	0	0	0	0	0	0	0	0	0	0	0	0	0	0	0	0	0	0	0	0	0	0	0	0	0	0	0	0.0024723	0	0	0	0	0	0	0	0	0	0	0	0	0	0	0	0
Leuconostoc_pseudomesenteroides	0	0	0	0	0	0	0	0	0	0	0	0	0	0	0	0	0	0	0	0	0	0	0	0	0	0	0	0	0	0	0	0.00128859	0	0	0	0	0	0	0	0	0	0	0	0	0	0	0	0
Leuconostoc_unclassified	0.0491443	0.119183	0.113824	0	0.377219	0.136686	0	0.184028	0	0.282453	0	0.121449	0	0.182682	0.0570392	0.757094	0	0	0.181725	0.129422	0.159496	0.0326342	0.030733	0.0311835	0.253572	0.0232272	0.0614491	0.0927711	0.033248	0.379461	0.0456274	0.0673663	0.125598	0.199055	0.107991	0.0159176	0.0761741	0.0220535	0.080225	0.252451	0	0.174883	0.0520889	0.207978	0.0785294	0.198315	0.12231	0.102509
Oenococcus_oeni	0	0	0.0103885	0	0	0.00218209	0	0	0	0.005113	0	0	0	0	0	0	0.00793701	0	0.0128892	0	0	0	0	0	0.00936304	0	0	0	0	0	0.00864298	0.00320649	0	0	0.00554975	0	0	0	0	0	0	0	0	0	0	0	0.00835094	0
Oenococcus_unclassified	0	0.0258533	0.0206606	0	0	0	0	0	0	0	0	0	0	0	0	0	0	0	0.0241518	0	0	0.0446523	0	0	0	0	0	0	0	0	0.0151252	0	0	0	0	0	0	0	0	0	0	0	0	0	0	0	0.0167656	0
Weissella_koreensis	0	0	0	0	0	0	0	0	0	0	0	0	0	0	0	0	0	0	0	0	0	0	0	0	0	0	0	0	0	0	0.00740527	0.00263712	0	0	0.00287765	0	0	0	0	0	0	0	0	0	0	0	0.00722473	0
Weissella_unclassified	0.0997474	0.105084	0.190965	0	0.0922485	0.0648692	0	0.357024	0.321442	0.151975	0.130319	0	0.0921777	0.263947	0	0.132899	0.118639	0.0629416	0.10787	0.165817	0.184551	0	0.14139	0.13315	0.163052	0.209468	0.123886	0.196738	0.199141	0.375335	0.0463826	0.16491	0.117455	0	0.0629447	0.232593	0	0.0886141	0.167456	0.173192	0.118971	0.0687065	0.113182	0.0690007	0.232054	0	0.0101146	0.393586
Lactococcus_garvieae	0	0.0126994	0.00147932	0	0	0	0	0	0	0	0	0	0	0	0	0	0	0	0	0	0	0.00215419	0	0	0.014285	0	0	0	0	0	0.00442638	0	0	0	0.00346267	0	0	0	0	0	0	0	0	0	0	0	0.00390985	0
Lactococcus_lactis	0	0.00137557	0.0318801	0	0.00348233	0.00132671	0	0.0138685	0	0	0	0	0	0	0	0.030255	0	0.00512415	0.00444738	0	0	0	0	0.00562543	0.00809646	0	0	0	0	0	0.0122302	0.00780646	0.0109451	0	0.0100085	0.00468062	0	0	0	0	0	0.00276474	0	0	0	0	0.0117296	0
Streptococcus_agalactiae	0	0	0.00430498	0	0	0.00616222	0	0	0	0	0	0	0	0	0	0	0	0.0061319	0	0	0	0	0	0	0.00513043	0	0	0	0.000784079	0	0.00365019	0.00335633	0.00124337	0	0.00499636	0	0	0	0	0	0	0	0	0	0	0	0.00597103	0
Streptococcus_anginosus	0	0.00183	0.00463741	0	0	0	0	0.00293868	0	0	0	0	0	0	0	0	0.00199813	0	0	0	0	0	0.0023906	0.00693212	0.00533885	0	0	0	0.00666467	0	0.0101954	0.00479476	0	0	0.0025298	0.00131478	0	0	0	0	0	0.00467087	0	0	0	0	0.00939215	0
Streptococcus_constellatus	0	0.0125398	0.0236192	0	0	0.0109105	0	0.0183023	0	0.00808754	0	0.0162388	0	0	0	0.074895	0.0476498	0.00444093	0.0161629	0.00520966	0	0	0.0206419	0.0156139	0.0276562	0.00957481	0	0	0.00993669	0.0263646	0.00967091	0.010983	0.0222931	0	0.0067356	0.0120259	0.00998978	0.00438607	0.00200724	0.0117456	0.0246519	0.00491129	0	0.0142867	0.0116804	0.00424299	0.00892467	0.0130309
Streptococcus_cristatus	0.00693895	0.0109309	0.0809636	0.00904455	0.00860632	0.0209481	0	0.00951204	0	0.0205485	0	0.0133202	0	0	0.00778504	0.00907185	0.00882507	0.0137156	0.0176866	0.0120405	0	0.00946712	0.0154239	0.019844	0.0248345	0.00841194	0.00272759	0	0.00562426	0	0.00585289	0.0060384	0	0.0163581	0.0337729	0.00857237	0	0.00290866	0	0.0154258	0.0136927	0.00915285	0	0.00929345	0	0.00777881	0.0198043	0
Streptococcus_dysgalactiae	0	0	0	0	0	0	0	0	0	0	0	0	0	0	0	0	0	0	0	0	0	0	0	0	0	0	0	0	0	0	0	0.00137849	0	0	0	0	0	0	0	0	0	0	0	0	0	0	0.00123245	0
Streptococcus_gallolyticus	0.334193	0.0335049	0.231854	0	0	0	0	0	0	0.0309674	0	0	0	0	0	0	0.0116835	0.00206674	0.00700051	0.00242267	0	0.0249622	0	0.0368532	0.00389592	0	0	0	0	0	0.043089	0.0197634	0	0	0.00430067	0.00389175	0.156989	0	0	0	0	0	0	0	0	0	0.0532293	0.198829
Streptococcus_infantarius	0	0.162772	0	0	0	0.0101249	0	0.0590313	0	0.00286199	0	0	0	0	0	0	0	0.0845997	0.0100478	0.0273052	0.0291804	0	0	0.0074858	0.0015231	0	0	0	0.00179433	0.700305	0.00528648	0.241101	0.0130641	0.0317582	0.0156215	0.0227194	0	0	0	0	0	0	0	0	0.00616507	0	0.00240116	0.172568
Streptococcus_infantis	0	0.00389335	0	0	0	0	0	0	0	0	0	0	0	0	0	0	0	0	0	0	0	0	0	0	0.00753532	0	0	0	0	0	0	0	0	0	0.0014072	0	0	0	0	0	0	0	0	0	0	0	0.00713973	0
Streptococcus_iniae	0	0	0	0	0	0	0	0	0	0	0	0	0	0	0	0	0	0	0	0	0	0	0	0	0	0	0	0	0	0	0.00398584	0.00104885	0	0	0.00289346	0	0	0	0	0	0	0	0	0	0	0	0.00482357	0
Streptococcus_intermedius	0	0	0	0	0	0	0	0	0	0	0	0	0	0	0	0	0	0	0	0	0	0	0	0	0.0184375	0	0	0	0	0	0.00434247	0.0055739	0	0	0.00580274	0	0	0	0	0	0	0	0	0	0	0	0.0108371	0
Streptococcus_massiliensis	0	0	0	0	0	0	0	0	0	0	0	0	0	0	0	0	0	0	0	0	0	0	0	0	0	0	0	0	0	0	0	0	0	0	0	0	0	0	0	0	0	0	0	0	0	0	0.00269865	0
Streptococcus_mitis_oralis_pneumoniae	0	0	0	0	0	0	0	0	0	0	0	0	0	0	0	0	0.00635516	0	0	0	0	0	0	0	0.00416847	0	0	0	0	0	0.000902059	0.00296676	0	0	0.000426904	0	0	0	0	0	0	0	0	0	0	0	0.00186993	0
Streptococcus_mutans	0	0.013596	0	0	0	0	0	0	0	0	0	0	0	0	0	0	0.0100461	0	0	0	0	0	0	0	0	0	0	0	0	0	0.00176216	0.00328141	0	0	0.00466432	0	0	0	0	0	0	0	0	0	0	0	0	0
Streptococcus_parauberis	0	0	0	0	0	0	0	0	0	0	0	0	0	0	0	0	0	0	0	0	0	0	0	0	0	0	0	0	0	0	0.000839125	0	0	0	0.00283022	0	0	0	0	0	0	0	0	0	0	0	0.00269865	0
Streptococcus_pseudopneumoniae	0	0	0.014627	0.00712741	0	0	0	0.0286134	0	0	0	0.0103819	0	0	0.015141	0	0	0.0175758	0.00366497	0	0	0.00438397	0.00995316	0	0.0259087	0	0	0	0.00467432	0	0.0106149	0.00674263	0	0	0.00257724	0	0	0	0	0	0	0.0351689	0	0	0	0	0.0094559	0.0159085
Streptococcus_pseudoporcinus	0	0	0	0	0	0	0	0	0	0	0	0	0	0	0	0	0	0	0	0	0	0	0	0	0	0	0	0	0	0	0.00127966	0.000389574	0	0	0.00194479	0	0	0	0	0	0	0	0	0	0	0	0.000722473	0
Streptococcus_pyogenes	0	0.00239496	0	0	0	0	0	0	0	0	0	0	0	0	0	0	0	0	0	0	0	0	0	0	0.00686195	0	0	0	0	0	0.00490888	0.00242735	0.00266186	0	0.00180248	0	0	0	0	0	0	0	0	0	0	0	0.00427109	0
Streptococcus_ratti	0	0.00120362	0	0	0	0	0	0	0	0	0	0	0	0	0	0	0	0	0	0	0	0	0	0	0	0	0	0	0	0	0.00192999	0.00070423	0	0	0	0	0	0	0	0	0	0	0	0	0	0	0.00123245	0
Streptococcus_salivarius	0	0.00400389	0	0	0	0	0	0	0	0	0	0	0	0	0	0	0.00169286	0	0.00613574	0	0	0	0	0	0	0.00144981	0.0104871	0	0.000663451	0	0.00159434	0.00573872	0	0	0.000648262	0	0	0	0	0	0	0	0	0	0	0	0.00437734	0
Streptococcus_sanguinis	0	0	0	0	0	0	0	0	0	0	0	0	0	0	0	0	0	0	0	0	0	0	0	0	0	0	0	0	0	0	0.0119995	0.00196285	0	0	0	0	0	0	0	0	0	0	0	0	0	0	0	0
Streptococcus_suis	0	0	0	0	0	0	0	0	0	0	0	0	0	0	0	0	0	0	0	0	0	0	0	0	0	0	0	0	0	0	0.00320965	0	0	0	0	0	0	0	0	0	0	0	0	0	0	0	0.0012112	0
Streptococcus_thermophilus	0	0.00248094	0	0	0	0	0	0	0	0	0	0	0	0	0	0	0	0	0	0	0	0	0	0	0	0	0	0	0	0	0.00310476	0.00145341	0	0	0.000632451	0.00203353	0	0	0	0	0	0	0	0	0	0	0.00172119	0
Streptococcus_tigurinus	0	0.0230162	0.0185829	0	0.0101485	0.0146811	0.0309512	0	0	0.0213524	0	0.018276	0	0.00760721	0.0128116	0.0164036	0.0189545	0.00386019	0.00667108	0.0375059	0.0477433	0.0227513	0.0171249	0.0136428	0.0266301	0	0.00464003	0	0.00955973	0	0.00578996	0.00843577	0.013607	0.0147905	0.0110363	0.00660896	0.0160938	0.00273937	0	0.00501143	0.00704698	0.00424157	0	0.0120659	0.0171322	0.024736	0.0190818	0.0193653
Streptococcus_urinalis	0	0	0	0	0	0	0	0	0	0	0	0	0	0	0	0	0	0	0	0	0	0	0	0	0	0	0	0	0	0	0.00461518	0.00410551	0	0	0.00458527	0	0	0	0	0	0	0	0	0	0	0	0.00767096	0
Streptococcus_vestibularis	0	0	0	0	0	0	0	0	0	0	0	0	0	0	0	0	0	0	0.00568277	0	0	0	0	0	0	0	0	0	0	0	0	0.00632308	0	0	0.00161275	0	0	0	0	0	0	0	0	0	0	0	0	0
Candidatus_Arthromitus_unclassified	0.0396821	0.0207564	0.0471554	0.00454547	0.0288867	0.0178931	0	0.0717656	0	0.0734953	0.0133531	0.0588242	0.00996211	0.0205885	0.0654066	0.134338	0.049981	0.0501825	0.0520715	0.0302743	0.0276335	0.0889266	0.0737177	0.0694319	0.0802431	0.00832133	0.0195634	0.0315246	0.0214566	0.035561	0.0262017	0.0150885	0.0629565	0.00973937	0.0602093	0.0324838	0.0326595	0.00678687	0.0180652	0.0543584	0.0577301	0.0498341	0.0260366	0.0374708	0.0134871	0.0181211	0.053463	0.0118545
Clostridium_acetobutylicum	0	0.00852362	0.0240514	0	0.00298485	0.00326441	0	0.0350837	0	0.0178151	0	0.0135748	0	0	0.00410707	0.0337584	0.0289729	0.012742	0.0256548	0.0102372	0.0151879	0.0196712	0.0277217	0.0207521	0.0237282	0	0	0	0.00741859	0	0.0241668	0.01371	0.0167767	0.00132084	0.0352908	0.0184946	0	0	0	0.0147054	0.0260312	0	0	0.0142302	0	0	0.0352312	0
Clostridium_beijerinckii	0.0151198	0.00928509	0.0392601	0.0123532	0.0286048	0.0285941	0.0131208	0.055938	0	0.0269799	0.0586675	0.0531631	0.00291345	0	0.0383122	0.0719484	0.0610262	0.0169951	0.0507743	0.00898029	0.0477433	0.0832577	0.0441111	0.0782687	0.0376445	0.0142867	0.00749302	0.0124296	0.00815744	0.0380106	0.0197824	0.0260415	0.0248849	0.0135567	0.0235272	0.046105	0.0139857	0.0234847	0.00527064	0.0412191	0.0380186	0.0249857	0.0237698	0.0250513	0.0270851	0.00175318	0.0109646	0.0437077
Clostridium_bolteae	0	0.000859731	0	0	0	0	0	0	0	0	0	0	0	0	0	0	0	0	0	0	0	0	0	0	0.00692608	0	0	0	0	0	0.00163629	0.00471984	0	0.00290294	0.00521772	0.00504876	0.00401165	0.00113884	0	0	0	0	0	0	0	0	0.00554604	0
Clostridium_butyricum	0.0357987	0.0249813	0.0308829	0.017718	0.0430979	0.0192373	0	0.0980075	0	0.0290701	0	0.0491279	0	0	0.0678586	0.185312	0.112034	0.0217093	0.0241929	0.0402929	0.0176723	0.0577853	0.0491681	0.0652682	0.0449554	0.00614661	0.0401143	0	0.0148975	0.0538035	0.0380123	0.0215165	0.049437	0.00883946	0.0786927	0.0200022	0.0411548	0.0166671	0.00668218	0.0291916	0.06894	0.038758	0	0.0430724	0.00231388	0	0.0542705	0.0296271
Clostridium_carboxidivorans	0	0.0112133	0.0247163	0	0.00945203	0.00897276	0	0.0467611	0	0.0218187	0	0.0174925	0	0	0.00429096	0.061206	0.0364381	0.0114781	0.00590926	0.0184524	0.0157035	0.0191421	0.0330776	0.0370082	0.0489956	0	0.0161461	0	0.00342281	0	0.0283414	0.0225204	0.048649	0	0.0274326	0.0166889	0.0131362	0.00155436	0	0.0212829	0.0730779	0.017533	0	0.0147677	0	0	0.0236504	0.00564671
Clostridium_cellulovorans	0.0032132	0.00604268	0.0119343	0	0.0129012	0.0218733	0	0.0456011	0	0.0113676	0	0	0	0	0	0.0291645	0.0140702	0.0183957	0.0126833	0.00440817	0.00274225	0.0287604	0.0235612	0.0102764	0.0141568	0	0.00123839	0	0.00648373	0	0.00782484	0.0114025	0.0256204	0	0.028065	0.0127446	0	0	0	0.0209384	0	0.0164854	0	0	0.0101272	0	0.0318951	0
Clostridium_clostridioforme	0	0.00370912	0	0	0	0.00120451	0	0	0	0	0	0	0	0	0	0	0	0	0	0	0	0	0	0	0	0	0	0	0.00180941	0	0.00339845	0.0108032	0	0	0.0138349	0	0	0	0	0	0	0	0	0	0	0	0.00550355	0
Clostridium_hathewayi	0.0174262	0.05743	0.0532887	0.0186921	0.0607417	0.0388412	0.0652739	0.0390277	0.0158714	0.064427	0.0194226	0.0701659	0.047555	0.0459519	0.0234777	0.0337816	0.0399626	0.0459978	0.0746584	0.0311669	0.0522903	0.0369614	0.0329167	0.0508725	0.060988	0.0433736	0.0482814	0.0101287	0.0688632	0.0494202	0.0554871	0.0922691	0.0753026	0.0637631	0.0665496	0.0487871	0.060741	0.028194	0.0506862	0.0623924	0.07373	0.0533373	0.0568586	0.0899923	0.0555808	0.0425919	0.0811932	0.0336993
Clostridium_kluyveri	0	0.00892892	0.0187657	0	0	0.0179455	0	0.0513753	0	0.00271729	0	0	0	0	0	0.0273084	0.019565	0.00917222	0.0341584	0	0	0.0115835	0.00524092	0.0100106	0.0365864	0	0.0128855	0	0.00693608	0	0.0126078	0.0105934	0.0257955	0	0.0207918	0.00695957	0	0.00470926	0	0	0	0.0197825	0	0	0.00407307	0	0.020888	0.00814429
Clostridium_papyrosolvens	0	0.00370912	0.007247	0	0	0	0	0	0	0	0	0	0	0	0	0	0.00654942	0.00346734	0.00755643	0.00839739	0	0	0	0	0.00897825	0	0	0	0	0	0.00665006	0.00684751	0.0065846	0	0.00529678	0	0.00744121	0	0	0	0	0	0	0	0	0	0.0171269	0
Clostridium_pasteurianum	0.105346	0.0307047	0.0692454	0.021073	0.0606256	0.0331852	0	0.0675123	0	0.0592015	0.0464054	0.0630945	0.0698476	0.0329525	0.106017	0.179627	0.088889	0.0664943	0.0929627	0.0776713	0.0659078	0.129403	0.120495	0.10097	0.0765556	0.0356413	0.0668729	0.0400877	0.0386159	0.0984321	0.0330615	0.0550348	0.0813093	0.0326436	0.0192739	0.0517498	0.0757336	0.0111576	0.0274798	0.0576941	0.176776	0.108048	0.017788	0.041969	0.0372757	0.0151009	0.0583503	0.0728642
Clostridium_perfringens	0.0109604	0.018779	0.0193641	0.014796	0.046232	0.0182248	0.00410134	0.0531282	0	0.0571273	0	0.0392161	0	0	0.0786779	0.137702	0.0755959	0.0157311	0.0608221	0.0312944	0.0462199	0.0835223	0.0603856	0.0850458	0.0588557	0	0.0203001	0	0.00695116	0.00457674	0.033502	0.0167067	0.0526593	0.00805566	0.0781077	0.0152339	0	0	0	0.11069	0.0806516	0.043343	0	0.0217272	0.0122034	0	0.0483419	0.0197092
Clostridium_saccharoperbutylacetonicum	0.00782603	0.0124538	0.0371492	0.00216451	0.0154549	0.0277736	0	0.0793959	0	0.0695078	0	0.0117531	0	0	0.0335002	0.145173	0.0584175	0.00705424	0.0256548	0.0218223	0.0328836	0.065684	0.0386863	0.0323351	0.0564347	0.00960502	0.00448327	0	0.0185616	0.00936835	0.0300197	0.0285438	0.0581756	0.00560268	0.056383	0.0235433	0.00783451	0.011373	0.0105154	0.0514925	0.0850403	0.0155753	0.00415578	0.027753	0	0.0327653	0.0317038	0.00877773
Clostridium_sp_L2_50	0	0	0.908601	2.27567	0	0.38321	9.23788	0	2.13166	0	1.40954	1.85101	0	0	0	0	0	1.40685	0	0	1.00908	0	0	0	0	0	4.26243	0	1.28339	0	0.194467	1.67824	5.78968	18.7804	8.79603	0	0	0	1.31789	0	0	1.75019	0	0	0	3.53055	0	0
Clostridium_sporogenes	0.0411409	0.0339225	0.0986323	0.0210266	0.0577237	0.03027	0.0036495	0.148481	0.0136389	0.0711318	0.0317769	0.0620955	0.0303938	0.00826081	0.0624029	0.250207	0.147223	0.0324529	0.0613574	0.0265219	0.0507668	0.136262	0.0709134	0.076962	0.0906162	0.0228346	0.0478111	0	0.0131182	0.0400303	0.0425646	0.0293829	0.0941107	0.0278828	0.0899187	0.0502246	0.0384803	0.0178829	0.0396139	0.0722743	0.136476	0.0524271	0.0383937	0.0626494	0.0455803	0.0237342	0.06685	0.060503
Clostridium_symbiosum	0	0.0113362	0.00859334	0	0.0141615	0.00937426	0	0	0	0.00622242	0	0	0	0	0	0.00350345	0.00824228	0.00693468	0.00609456	0	0	0	0	0	0.00445706	0.00282412	0.00761843	0	0.00541316	0	0.0138456	0.0105485	0.0125563	0	0.0163489	0.00546949	0	0	0.00476559	0.00234911	0	0.0019233	0	0.00380508	0.00767068	0	0.0208667	0
Clostridium_thermocellum	0	0.00627603	0.00521917	0	0	0	0	0	0	0	0	0	0	0	0	0	0	0.00374063	0.00825649	0.00887099	0	0.0231859	0.0128724	0.0122032	0.0179405	0	0.00366813	0	0.00141737	0	0.00904157	0.00861558	0	0	0.00581855	0.00699463	0.00471958	0.0025393	0	0	0.00784948	0	0	0	0	0	0.0202292	0
Clostridium_tyrobutyricum	0.0123206	0.00962898	0.0250487	0.00241188	0.024028	0.015327	0	0.0177094	0	0.0152908	0	0.00650337	0	0	0.00947077	0	0.043265	0	0.0329848	0	0	0.0544784	0.00291929	0.0279942	0.0270791	0	0.00489084	0	0.000995177	0	0.0281316	0.0114774	0.0153407	0.00616875	0.020776	0.00960666	0.0249981	0.00350886	0.00942757	0.0267329	0.0345076	0.0250544	0	0.00864277	0.00472286	0	0.0385036	0
Anaerococcus_hydrogenalis	0.0511944	0.0503557	0.0749466	0.04513	0.0611563	0.0909146	0.00406658	0.171423	0.00403351	0.081599	0.0337899	0.0782951	0.00349614	0.00991297	0.0848998	0.0845237	0.0920527	0.0761619	0.0827502	0.0353018	0.100104	0.164909	0.160814	0.102476	0.0754013	0.0186815	0.0398165	0.00735337	0.0187576	0.0135583	0.0559067	0.0342226	0.0878939	0.0230639	0.125953	0.105971	0.0216943	0.0518018	0.0172494	0.0878724	0.130457	0.0901376	0.00843749	0.0530872	0.0265304	0.0423562	0.079047	0.0973695
Anaerococcus_prevotii	0.0131091	0.0393388	0.0270931	0.0290817	0.0329992	0.042769	0.0148413	0.0290259	0.0423237	0.0335721	0.0330523	0.0626635	0.0376493	0.0171752	0.0176236	0.12856	0.0101572	0.0489185	0	0.0107654	0	0.0234316	0.0237221	0.0239191	0.0582625	0.0209619	0.0566366	0.0257131	0.0110676	0.0324239	0.0360824	0.0348219	0.0363379	0.00502209	0.00531259	0.0068018	0.0472902	0.0239003	0.0329447	0.0141416	0.125717	0.0755583	0.0885307	0.0647288	0.0228377	0.0158228	0.0279002	0.0202521
Finegoldia_magna	0.0269476	0.0196387	0.045061	0.0136364	0.0377418	0.0348785	0.00995791	0.0702447	0	0.0317553	0	0.0237412	0	0.00412133	0.0377911	0.0749646	0.0407674	0.0290198	0.0210633	0.0360304	0.0108518	0.0209184	0.0742694	0.0519798	0.0522823	0.0274105	0.00832384	0	0.0162546	0.00747749	0.0222578	0.0324995	0.0459346	0.0198126	0.0605097	0.0276279	0.0230316	0	0	0.0414226	0.0445891	0.0467603	0.0134905	0.0158993	0.0240581	0.00860384	0.0470457	0.0068412
Parvimonas_unclassified	0.0911328	0.0359245	0.0668851	0.0224181	0.114718	0.0539762	0.046644	0.141598	0.0103933	0.101681	0.0299484	0.0540054	0.0402056	0.0715877	0.123886	0.217191	0.168481	0.0462369	0.0876917	0.0615323	0.0675251	0.152664	0.12877	0.127768	0.117102	0.0373025	0.0329662	0.0334697	0.0232962	0.0888274	0.04311	0.0505697	0.0941808	0.0279263	0.100955	0.0770286	0.0742076	0.0404596	0.0522661	0.0989289	0.146958	0.0759189	0.0430218	0.0437655	0.0696701	0.0294947	0.0896929	0.0826555
Peptoniphilus_lacrimalis	0.0855146	0.0324855	0.0936791	0.0328696	0.0892139	0.0993637	0.00743802	0.155286	0.0144643	0.115943	0.0511381	0.0797055	0.0616523	0.0180285	0.203269	0.236866	0.100711	0.0578687	0.0754408	0.0762322	0.0470636	0.135431	0.129575	0.149428	0.0761869	0.0378009	0.0523414	0.0752179	0.0222859	0.0839498	0.0906884	0.0399463	0.118103	0.0338773	0.113304	0.0761346	0.0483285	0.0379819	0.033126	0.0919285	0.167698	0.0621295	0.0442181	0.0427329	0.060367	0.0639395	0.120186	0.0657154
Sulfobacillus_acidophilus	0	0	0	0	0	0	0	0	0	0	0	0	0	0	0	0	0	0	0	0	0	0	0	0	0	0	0	0	0	0	0	0.000584361	0	0	0	0	0	0	0	0	0	0	0	0	0	0	0.00155119	0
Sulfobacillus_unclassified	0	0	0	0	0	0	0	0	0	0	0	0	0	0	0	0	0	0	0	0	0	0	0	0	0	0	0	0	0	0	0.00675495	0	0	0	0	0	0	0	0	0	0	0	0	0	0	0	0.00233741	0
Thermaerobacter_unclassified	0.0148635	0.0474448	0.0438643	0.0194033	0.0660979	0.0317887	0.0376767	0.0188436	0	0.0271729	0.00502469	0.0268558	0.00719904	0.0492018	0	0	0.0328304	0.0328287	0.0294021	0.0420051	0.0231334	0.0599584	0.0384794	0.032468	0.0520739	0.0425279	0.0296272	0.0222024	0.0514778	0	0.0349705	0.0428232	0.0313819	0.0281295	0.0442557	0.0463504	0.0351294	0.0359504	0.0396787	0.0691578	0.0145955	0.0390671	0.032774	0.0254756	0.0375293	0.0395128	0.0566079	0.0559422
Bacteroides_pectinophilus	0	0	0	0	0	0	0	0	0	0	0	0	0	0	0	0	0	0	0	0	0	0	0	0	1.09961	0	0	0	0	0	0	0.41187	0	0	0.377051	0	0	0	0	0	0	0	0	0	0	0	0.187737	0
Eubacteriaceae_noname_unclassified	0.0318758	0.0189632	0.0499644	0	0.0229004	0.0282799	0	0.0495709	0	0.0399232	0.0226802	0.0205287	0.022255	0.00795217	0.0102677	0.106821	0.0470948	0.0437944	0.0613574	0.0298189	0.0233443	0.0435185	0.059627	0.0776486	0.0619179	0.00765683	0.0153309	0	0.0112334	0.0438335	0.0268939	0.0222806	0.0388772	0.00670579	0.0388641	0.039759	0.0396445	0.0101418	0.00688938	0.0511323	0.0670341	0.083904	0	0.0199731	0.0131543	0.00677699	0.0536117	0.0331201
Eubacterium_eligens	0	0.19554	0	0	0	0	0	0	0	0	0	0	1.43298	0	0	0	0	0	0	0	0	0	0	0	0.303224	0	0	0	0.401192	0	0	0	0	0	0.365525	0	0	0	0	0	0	0	0	0	1.16623	0	0	0
Eubacterium_hallii	0	0.629458	0	0	0	0	0	0	0	0	0	0.983126	0	0	0	0	0	0	0	0	0	0	0	0	0	0	0	0	0.380761	0	0.27882	0.41148	0	0	0.28016	0	0	0	0	0	0	0	0	0	0	0	0	0
Eubacterium_ramulus	0	0	0	0	0	0	0	0	0	0	0	0	0	0	0	0	0	0	0	0	0	0	0	0	0	0	0	0	0	0	0	0	0	0	0	0	0	0	0.835454	0	0	0	0	0	0	0	0	0
Eubacterium_rectale	0.0779843	0.136808	0.0988151	0.0171769	0.0999428	0.0347563	0.0529351	0.0377646	0.00656617	0.132681	0.00396443	0.130655	0.759282	0.0162311	0.081467	0.171437	0.0296667	0.0802441	0.178966	0.118274	0.0271178	0.00969387	0.018711	0.133216	0.310648	0.0793169	0.230763	0.0596335	0.122814	0.284811	0.138393	0.191221	0.484528	0.0608311	0.0818866	0.0888441	0.108236	0.0231769	0.769746	0.141025	0.266105	0.230659	0.157605	0.980721	0.465962	0.00695378	0.066935	0.198341
Eubacterium_siraeum	0.427061	0.0916964	1.84235	0.289874	0.0464808	0.858976	1.16374	0.102983	0.0354386	0.55878	0.088078	0.158314	0.0195295	0.512769	0.307294	0.270207	0.262698	0.458133	2.01199	2.52931	0.629171	0.570351	0.0711203	0.110006	0.146313	0.0297967	0.0375748	1.5615	0.0583837	3.263	0.118736	0.0755474	0.350105	0.162478	2.35714	0.411474	0.223378	4.56855	0.0959592	0.350581	1.07147	1.8469	0.464219	0.540321	0.095107	0.324544	2.16551	0.908848
Eubacterium_sp_3_1_31	0	0.0126749	0	0	0	0	0	0.00894492	0	0	0	0	0	0	0	0	0.00210914	0	0.00191485	0	0	0	0	0	0.0158081	0	0	0	0	0	0.00534942	0.00461495	0.00646201	0	0.00714669	0	0	0	0	0	0	0	0	0.00234812	0	0	0.00909466	0
Anaerostipes_unclassified	0	0.0186316	0.0125327	0	0.00250396	0.0100376	0	0	0	0.017188	0	0.0181389	0	0	0	0.01058	0.00355223	0.00534619	0.0108714	0	0	0.0037226	0	0	0.0144614	0.0178659	0.0177136	0	0.0155157	0.00702626	0.0128596	0.0158377	0.0205944	0.00953616	0.024713	0.0130602	0.00750414	0.0173442	0.026405	0	0	0.0231826	0.00977553	0.0137351	0	0	0.0297489	0.00660592
Ruminococcus_gnavus	0	0.0294888	0.019763	0.0147496	0	0.00305493	0	0.0190756	0	0.0423511	0	0.0297941	0.0360328	0	0	0.00403709	0.00591113	0.0236052	0.0411589	0.0141353	0	0.0084656	0.0091946	0.0153481	0.0419092	0.00661477	0.0250499	0	0.0254976	0	0.020118	0.043932	0.0399454	0.0326	0.0270056	0.0138841	0.0271219	0.0254238	0.0444313	0.0136875	0.0237742	0.0213109	0	0.0472877	0.0363407	0.0130678	0.0378448	0.0192748
Ruminococcus_obeum	0.226699	0.687834	0.365458	0.262137	0.16954	0.107848	0.0780819	0.22486	0.150909	1.02744	0.0759081	0.446931	0.242436	0.229051	0.348089	0.431551	0.200618	0.326869	0.359517	0.204871	0.189755	0.205404	0.241381	0.236711	0.396358	0.951501	0.227362	0.394639	0.510013	0.486209	0.153853	0.403973	0.442131	0.226923	0.219619	0.666734	0.29038	0.971938	1.26691	0.742381	0.709262	0.287757	0.559881	0.732089	0.337241	0.294755	0.214489	0.502159
Ruminococcus_torques	3.74447	4.12344	4.09023	3.7606	4.36384	4.13483	3.18478	3.11268	3.61967	7.5994	4.89186	5.27706	5.91533	4.12828	4.77909	7.66722	5.41851	4.74052	6.88397	4.68937	4.54942	3.15223	3.1846	6.66423	7.20599	4.20253	5.61146	5.27422	4.31037	6.26166	2.93725	8.19263	9.88641	6.34895	5.24385	4.55936	4.99165	6.92606	14.6849	5.10269	12.4182	5.67339	5.68892	10.8701	6.06957	2.4452	5.82058	5.11172
Butyrivibrio_fibrisolvens	0.0026021	0.00986234	0.00573444	0	0.0043612	0.0071398	0	0	0	0	0	0.0136923	0.00734941	0	0	0	0.0164013	0.00160557	0.0215163	0.0169223	0.0112034	0	0.00179295	0	0.019159	0.0026882	0.021852	0	0.0139174	0.0252043	0.0167196	0.0153282	0.0102447	0.00474631	0.0132182	0.0106059	0.0052702	0.00332418	0.00288784	0.0146271	0.00642003	0.0135661	0	0.0187284	0.00144221	0.00580464	0.013557	0.0113296
Butyrivibrio_unclassified	0.242863	0.145442	0.145688	0.495255	0.214296	0.233292	0.189652	0.147011	0.459032	0.321251	0.22333	0.254004	0.235707	0.414475	0	0.315032	0.908094	0.158046	0.255786	0.297916	0.0647828	0.37088	0.181157	0.351058	0.316532	0.0858713	0.148183	0.171998	0.58055	0	0.381424	0.641613	0.247676	0.188502	0.977295	0.25512	0.349878	0.0696539	0.706472	0.341952	0.101241	0.0453006	0.475113	0.391584	0.428544	0.289702	0.243601	0.183156
Coprococcus_catus	0	0.210831	0	0	0	0	0	0	0	0	0	0	0	0	0	0	0	0	0	0	0	0	0	0	0	0	0	0	0	0	0	0	0	0	0	0	0	0	0	0	0	0	0	0	0	0	0	0
Coprococcus_sp_ART55_1	0	0	0	0	0	0	0	0	0	0	0	0	0	0	0	0	0	0	0.90599	0	0	0	0	0	4.21484	0	0	0	0	0	0.173174	0	0	0	0	0	0	0	1.65611	0	0	0	0	0	0	0	0	0
Dorea_formicigenerans	0.486337	0.496912	0.494807	0.0586272	0.159955	0.151036	0.112665	0.0943728	0.130254	0.326251	0.0500471	0.229871	0.803755	0.190961	0.339323	0.249209	0.070545	0.768229	0.134636	0.286877	0.474175	0.0950491	0.289331	0.149517	0.622482	0.243418	1.0581	0.511652	0.565532	1.01442	0.236759	0.914765	0.577466	0.449869	0.470591	0.256768	0.142563	1.81557	1.48883	0.715883	1.45702	0.328301	0.415279	1.0507	0.233385	0.146471	0.321734	0.10222
Dorea_longicatena	0	0.347036	0	0	0	0	0	0	0	0	0	3.57546	0	0	0	0	0	0	0	0	0	0	0	0	0.889905	1.59534	0	0	0	0	0	1.57938	3.73489	0	1.14496	0.671555	0	0	2.76495	0	0	0	2.46967	0	0	0	0	0
Dorea_unclassified	0	0	0.488657	0.402367	0.221642	0.301722	0.201852	0.521641	0.251128	0	0.167305	0	0	0.265472	0.737341	0.290114	0.397406	0.139326	0.17771	0	0.0795488	0.0599395	0.0522253	0.093639	0	0	0.174346	0.093032	0	0	0	0	0	0.142883	0	0	0.0783608	0	0	0.183544	0	0.0265141	0	0.434373	0	0.413839	0	0.377587
Lachnoanaerobaculum_saburreum	0	0.0111519	0.0238021	0	0	0.0113992	0	0	0	0	0	0	0.00359012	0	0	0.00955909	0.0324418	0	0.0218869	0	0	0.00992063	0.00563169	0	0.0355763	0	0.00153623	0	0.00545839	0	0.0155658	0.0140396	0.022871	0.00856368	0.0196218	0.00294511	0	0.0094339	0.00446774	0.0244464	0	0.00497998	0	0.0152486	0	0	0.0275177	0
Oribacterium_sp_oral_taxon_078	0	0.0230039	0.0277912	0.0113791	0.0167815	0.0143843	0.0357651	0	0	0.0173006	0	0.0126346	0	0.0172115	0	0.00798138	0.0215354	0.0143135	0.0407059	0.0188714	0.00297663	0.0190287	0.0137229	0.0178286	0.0363619	0.0217472	0.0220872	0	0.017883	0	0.0206005	0.0241985	0.00740767	0.0136293	0.0225152	0.0290128	0.0388264	0.044307	0.00192954	0.0354872	0.0250782	0.0396166	0.00366779	0.0111889	0.0109355	0	0.0324688	0.0125241
Roseburia_hominis	0	0	0	0	0	0	0	0	0	0	0	0	0	0	0	0	0	0	0.476982	0	0	0	0	0	0	0	0.78567	0	0.489687	0	1.01026	1.52359	1.25848	0.756477	0.900041	0	0	0	0	0	0	0	0	0.719995	0	0	0	0
Roseburia_intestinalis	0.341783	0.115265	0.173994	0.0203	0.173785	0.0967452	0.149143	0.0219112	0.0204302	0.14199	0.145854	0.323895	0.91642	0.0822269	0.64576	0.375798	0.0253374	0.129624	0.299087	0.2748	0.143418	0.0646258	0.0958308	0.140901	0.185706	0.0244052	0.299548	0	0.210284	0.448327	0.116345	0.609608	0.205243	0.132998	0.235588	0.0709456	0.146276	0.123672	0.268233	0.177781	0.121554	0.601976	0.0528917	0.411769	0.591594	0.0410008	0.0934753	0.00736606
Roseburia_inulinivorans	0	0	0	0	0	0	0	0	0	0	0	0	0	0	0	0	0	0	0	0	0	0	0	0	1.47482	0	0	0	0	0	0.127379	1.27992	0	0	0.353809	0	0	0	0	0	0	0	0	1.19491	0	0	0	0
Roseburia_unclassified	0.0306339	0.0452341	0.0859999	0.420409	0.192092	0.303363	0.405685	0.337149	0.445487	0.336831	0.416757	0.0485206	0	0.216034	0.172374	0.485263	0.195373	0.166825	0	0.100678	0.624062	0.126568	0.126219	0.266499	0	0.0372723	0	0.222665	0	0.0448434	0	0	0	0	0	0.0759242	0.245843	0.0784107	0.490972	0.183857	0.229867	0.0185633	0.281649	0	0.31575	0.145867	0.10427	0.155447
Oscillibacter_unclassified	2.05503	1.64334	1.5853	0.791267	1.77877	1.59034	2.23598	0.683294	0.911666	1.16449	1.29095	1.04205	1.27921	1.90932	1.07139	1.87683	1.37405	1.17849	2.08234	1.63476	1.26826	1.61357	1.89331	0.836439	1.48244	1.51049	0.564767	2.14937	1.05433	0.868184	1.09615	1.05958	1.2689	0.945053	1.48578	2.0563	2.20406	5.16245	0.958634	2.51455	2.61388	2.0626	1.39096	1.29112	1.05615	1.16993	2.56506	2.09683
Dehalobacter_unclassified	0	0	0	0	0	0	0	0	0	0	0	0	0	0	0	0	0	0	0	0	0	0	0	0	0	0	0	0	0	0	0.00104891	0.00401561	0	0	0	0	0	0	0	0	0	0	0	0	0	0	0.00730973	0
Desulfitobacterium_hafniense	0	0.00217389	0	0	0	0	0	0	0	0	0	0	0	0	0	0	0	0	0	0	0	0	0	0	0	0	0	0	0	0	0.00480399	0.00433026	0	0	0.00341523	0	0.00171478	0	0	0	0	0	0	0	0	0	0.0112408	0
Desulfitobacterium_unclassified	0	0	0	0	0	0	0	0	0	0	0	0	0	0	0	0	0	0	0	0	0	0	0	0	0	0	0	0	0	0	0	0	0.00201391	0	0.000300414	0	0	0	0	0	0	0	0	0	0	0	0	0
Desulfosporosinus_unclassified	0	0.00423724	0	0	0	0	0	0	0	0	0	0	0	0	0	0	0	0	0.00529156	0	0	0	0	0	0.00755135	0	0	0	0.00233716	0	0.00637735	0.00681754	0	0	0.00191316	0	0	0	0	0	0	0	0	0	0	0	0.00869093	0
Clostridium_bartlettii	0	0.390711	0	0	0	0.452286	0	0.941666	0	0	0	0	0	0	0	0	1.84255	0.657531	0	1.2575	0	0	0	0.801645	0	0.5533	0.390907	0	0.245145	0	0.135603	0.701113	0	0	0.191538	0.463188	0.659357	0	0	0	0	0	0	0	0.545348	0	0.332083	0
Clostridium_bifermentans	0.0164209	0.0216038	0.0263285	0	0.017478	0.0410582	0	0.082747	0.0132449	0.0558732	0	0.0287559	0	0.00562825	0.0286882	0.0597443	0.0575017	0.0076179	0.0347349	0.0281795	0.0327899	0.0951247	0.0376289	0.0199105	0.0882274	0	0.0210212	0	0.0126659	0.0207565	0.0379075	0.0128859	0.0646902	0.00931844	0.0729374	0.0219305	0.0295289	0.00709466	0	0.0579447	0.0600122	0.0318032	0.0267922	0.0253201	0.0227902	0	0.0465145	0.0343689
Clostridium_difficile	0.0219799	0.0167156	0.027143	0.0258813	0.0604266	0.0219082	0	0.0910732	0	0.0557124	0	0.0197648	0	0	0.0429097	0.114106	0.0826726	0.0284561	0.0273432	0.0326788	0.0221255	0.0739418	0.0612131	0.03156	0.0406106	0	0	0	0.00767493	0.00801466	0.0200131	0.0211419	0.0327129	0.0130342	0.0563039	0.0229999	0.00495556	0	0	0.0410624	0.0402756	0.0551232	0	0.01928	0.00540434	0.00365368	0.053803	0.0230755
Clostridium_sordellii	0.00510564	0.0195036	0.057361	0.00299939	0.0251225	0.0508863	0	0.0970537	0	0.0724502	0	0.0376295	0	0	0.0687167	0.132644	0.0730427	0.0492089	0.0895036	0.0502022	0.0353446	0.113284	0.144884	0.0759654	0.0433521	0	0	0	0.0108263	0.0434038	0.0563053	0.0258168	0.0716075	0.00923135	0.0875628	0.0195464	0.0276568	0	0.00863763	0.134573	0.109492	0.0880082	0.00550956	0.00677559	0	0.0375092	0.0667013	0.0449022
Peptostreptococcaceae_noname_unclassified	1.50648	1.95816	1.19336	1.04883	0.822194	0.693329	3.43911	3.45269	5.48071	2.7287	1.21498	0.399272	1.02843	0.814625	3.2767	2.93081	2.55305	0.415312	1.18943	3.08463	3.90584	1.82547	2.17305	1.29905	2.0802	1.37365	1.62312	3.11892	1.58227	4.59343	0.826789	1.59928	2.40336	1.37009	1.81705	1.33959	1.21059	0.919182	0.703028	0.0250572	1.54708	1.21281	1.34619	1.543	2.89194	1.38778	1.54762	1.77853
Peptostreptococcus_anaerobius	0	0.00385651	0	0	0	0.00548141	0	0.00507824	0	0	0	0	0	0	0	0	0.00524509	0	0.00786528	0	0	0	0	0	0.0058038	0	0	0	0	0	0.00618854	0.00555892	0.0121885	0	0.0102615	0.00802893	0	0	0	0	0	0	0	0	0	0	0.0136845	0
Peptostreptococcus_unclassified	0.191058	0.0915122	0.073434	0.064425	0.160253	0.0962738	0.0844424	0.12577	0.0599586	0.179357	0.0900295	0.163897	0.133041	0.0379997	0.115304	0.187771	0.301717	0.0723188	0.203591	0.0610404	0.125089	0.236224	0.093716	0.140769	0.16924	0.094253	0.145346	0.156485	0.0620176	0.257458	0.075731	0.0890626	0.0703116	0.0781472	0.0853018	0.217097	0.067726	0.0830122	0.183605	0.0973941	0.407095	0.25458	0.092655	0.129132	0.162558	0.0637037	0.0263065	0.0644666
Anaerotruncus_unclassified	8.55066	5.27274	4.01419	5.06807	7.12884	4.30432	7.38962	4.40928	5.12079	5.07476	6.37095	6.00351	2.7493	10.241	3.86432	7.22755	7.30266	6.79966	9.54598	4.50617	3.79113	3.57301	6.16735	5.03777	6.46954	5.20696	2.38421	7.33532	3.38092	4.56563	5.18678	3.37043	4.61253	2.74721	3.02626	6.31121	7.76396	10.4473	4.77934	10.0809	6.72653	5.99299	6.71196	7.80295	5.58472	4.6385	10.2786	6.10912
Faecalibacterium_prausnitzii	7.20018	15.2022	3.35955	13.8438	7.37519	4.51447	8.11897	6.57511	2.64527	9.46242	12.1184	12.6331	19.7089	3.27019	6.3502	2.16388	3.58484	3.38405	11.623	2.20629	3.47411	2.12264	5.72031	2.94916	18.4171	14.7088	22.2725	19.6171	12.8432	5.6544	7.65563	12.2961	16.4665	7.42218	6.83023	7.48938	5.54117	7.38385	44.8888	3.48887	6.09617	5.01745	21.6333	27.1146	24.6376	5.2352	3.732	9.95413
Ruminococcus_albus	0.292461	0.123592	0.395593	0.224166	0.248688	0.283235	0.42315	0.24306	0.144568	0.184984	0.301635	0.406598	0.378241	0.304833	0.348457	0.417236	0.240913	0.263449	0.363903	0.3236	0.195872	0.260865	0.282941	0.221894	0.282558	0.182027	0.138119	0.262397	0.119768	0.248906	0.186013	0.231452	0.356391	0.201014	0.179901	0.239991	0.289153	0.292328	0.17577	0.247628	0.251911	0.389657	0.221201	0.205757	0.416737	0.275632	0.284824	0.396283
Ruminococcus_bromii	0	0	0	0	0	0	0	0	0	0	0	0	0	0	0	0	0	0	0	0	0	0	0	0	0	0	0	0	0	0	0	0	0	0	0.237422	0	0	0	0	0	0	0	0	0	0	0	0	0
Ruminococcus_callidus	0	0	0	0	0	0	0	0	0	0	0	0	0	0	0	0	0	1.05622	0	0	0	0	0	0	0	0	0	0	0	0	0	1.31234	0	0	0.414998	0	0	0	0	0	0	0	0	0	0	1.85146	0	0
Ruminococcus_champanellensis	0	0	4.30781	2.25067	0	0.442231	0	0	0	0	1.59797	2.20831	0	0	1.58278	1.98576	1.23684	0	1.49735	0	0	2.29671	4.17155	4.35262	0.501275	0	0	0	0.295447	0	0.377606	0	0	0	0.537077	0	4.42214	0.899253	0	0.81226	1.05662	2.41644	0	1.94591	0.830209	0	1.77008	1.04231
Ruminococcus_flavefaciens	0.618118	0.225864	1.26856	0.43924	1.12207	0.583718	1.12375	1.4705	0.869286	0.552622	0.950911	0.968807	1.08111	1.31276	0.674785	1.20985	0.496646	0.721514	1.08028	1.01044	0.457558	0.835279	0.89429	0.910588	0.723583	0.570849	0.519574	0.482619	0.590004	0.8901	0.775456	0.70447	0.268095	0.782212	0.520333	0.986261	1.14193	0.678841	0.264814	0.712407	1.38525	1.27889	0.826418	0.676484	1.06285	0.577739	0.63414	1.06703
Ruminococcus_lactaris	0.0271644	0.0483783	0.0632118	0.0144249	0.0628145	0.0157634	0.0209238	0.0211121	0.0318178	0.0627227	0	0.0562581	0.0911064	0.00737119	0.0507253	0.0985607	0.0326916	0.0389948	0.0796823	0.040475	0.0487746	0.0312547	0.0310318	0.0499423	0.109807	0.0320771	0.0535955	0	0.0606907	0.0383544	0.035432	0.0915049	0.0854422	0.0495677	0.0575688	0.0500844	0.0570283	0.0472465	0.149805	0.0615154	0.106181	0.0522554	0.0272487	0.127689	0.0526805	0.0338702	0.0539517	0.0284507
Subdoligranulum_unclassified	4.57943	6.05786	8.91279	5.86416	6.69437	6.73498	5.08034	4.50061	7.02669	8.61999	10.9096	10.696	1.89675	6.66956	6.25108	10.8268	12.6097	5.72649	6.13842	5.58477	6.70537	10.5661	10.746	6.58554	4.83641	5.10309	3.30709	5.88502	13.4187	5.50212	9.09194	4.35302	5.22537	5.65496	7.09654	7.29779	8.95421	13.6502	4.21839	9.15049	4.89494	8.34845	6.37423	6.57092	8.66843	9.31278	8.65127	7.96767
Caldanaerobacter_subterraneus	0	0	0	0	0.00301802	0	0	0	0	0	0	0	0	0	0	0	0.0061609	0	0	0	0	0.0133976	0	0.0118931	0.00926684	0	0	0	0	0	0.00390193	0.00500453	0	0	0.00452202	0.00271721	0	0	0	0	0	0	0	0	0	0	0.00832969	0
Tepidanaerobacter_acetatoxydans	0	0.00243181	0	0	0	0	0	0	0	0	0	0	0	0	0	0.0220416	0	0	0.00323259	0	0	0	0	0	0	0	0	0	0	0	0.00839125	0.00533417	0.00441308	0	0.014657	0	0	0	0	0	0	0	0	0	0	0	0.0135995	0
Thermoanaerobacter_ethanolicus	0.0610706	0.063964	0.107192	0	0.181048	0.0190802	0.0546903	0	0	0.159596	0.208025	0.271359	0	0.280886	0.45803	0.326053	0.343373	0.0274996	0.0914802	0.0356661	0.0943851	0.0343726	0.140356	0.12542	0.233338	0.125379	0.15403	0	0	0.306362	0.0715354	0.100405	0.0691033	0.0911959	0.0562249	0.14438	0.0583026	0	0	0.0885771	0.187284	0.0341386	0.0626987	0.109202	0.0341377	0.0557776	0.140457	0.0326314
Thermoanaerobacter_unclassified	0	0	0	0	0	0	0	0.0373521	0	0	0	0	0	0	0	0	0	0	0	0	0	0.0109788	0	0	0	0	0	0	0	0	0	0	0	0	0	0	0	0.00327801	0	0	0	0	0	0	0	0	0	0
Caldicellulosiruptor_unclassified	0.00268096	0.0101203	0.025298	0.0115492	0.0150901	0.0138432	0	0.0238703	0	0.0221242	0	0.0176884	0	0	0	0.0122505	0.0181497	0.00946259	0.0108508	0.00739553	0.0182817	0.0227135	0.00726374	0.0170535	0.0262293	0	0.00404435	0	0.00868518	0.0159434	0.0207054	0.0112377	0.0327654	0.00847659	0.0272428	0.00785362	0.0131676	0	0.00731673	0.00429104	0.0159748	0.0159703	0	0	0.0042791	0.0171635	0.0356562	0.0150398
Thermoanaerobacterium_thermosaccharolyticum	0	0.00251778	0	0	0.0225688	0.00359609	0	0	0	0	0	0	0	0	0	0.0185381	0.0158463	0	0.0181601	0.00284163	0	0.0245087	0.0293768	0.00527107	0.019159	0	0.00150487	0	0	0	0.0148735	0.00581364	0.00590162	0	0.0115738	0.0105358	0	0	0	0.0159426	0	0	0	0.00538935	0	0	0.0208242	0
Thermoanaerobacterium_unclassified	0	0	0	0	0	0.000663355	0	0	0	0.00258866	0	0	0	0	0	0	0	0	0	0	0	0	0	0	0	0	0	0	0	0	0	0	0.000490343	0	0	0	0	0	0	0	0	0	0	0	0	0	0	0
Coprobacillus_unclassified	0.0225516	0.0273886	0.0547514	0.00791591	0.0290028	0.0122721	0.0154843	0.0722554	0	0.0676427	0.0219734	0.0264836	0.0136086	0	0.0223437	0.067192	0.0495092	0.0338877	0.0403147	0.0164487	0.039165	0.0485261	0.0466856	0.0363438	0.0486589	0.0275918	0.0369792	0.0173634	0.012681	0	0.0303973	0.0435723	0.0423096	0.0135277	0.049932	0.0340791	0.0204358	0.0217611	0.0774537	0.0449933	0.0513853	0.046331	0.0493341	0.0646439	0.0297952	0.00502382	0.0327875	0.0377171
Erysipelothrix_rhusiopathiae	0	0.000601811	0	0	0	0.00223446	0	0	0	0	0	0	0	0	0	0	0	0.00442385	0	0	0	0	0	0.0024805	0	0	0	0	0	0	0.00295791	0.00319151	0.00266186	0	0.00694115	0	0	0	0	0	0	0	0	0	0	0	0.0093284	0
Erysipelothrix_unclassified	0	0.00932194	0.0214418	0.00771492	0.0306445	0.00495771	0	0	0	0.0265619	0	0.012948	0	0.0208427	0	0.0682593	0.0177889	0.00597817	0.0215986	0.0174688	0.0116722	0.0377173	0.0437203	0.0267097	0.0155837	0.0034131	0.0114903	0.025381	0.00551871	0	0.00715354	0.0192989	0.0221705	0.012323	0.0191949	0.0345524	0	0.00972631	0	0.0163341	0	0.0225816	0	0.00893982	0.0037244	0.00396307	0.020038	0
Holdemania_unclassified	0	0.0154506	0.0176521	0	0.024111	0.0067383	0	0	0	0	0	0	0	0	0.00845933	0	0.00635516	0	0.0211868	0.0210208	0	0	0.00505703	0.00493886	0.00965162	0	0.00434219	0	0.0052473	0	0.0173909	0.00692243	0.00408035	0	0.0130759	0.00287499	0.0220562	0	0	0	0	0	0	0	0	0	0.0251591	0.00807189
Turicibacter_unclassified	0	0.00313188	0.00558484	0	0	0.0216812	0	0.00817159	0	0.0186512	0	0.00258568	0	0	0	0.0120185	0.00549485	0	0.00689756	0	0	0	0.00448237	0	0.0125054	0.00164614	0.0049849	0	0	0	0.00795071	0.00540908	0.0118208	0	0.0110205	0.0177232	0	0.00672531	0	0	0	0.00441329	0	0	0	0	0.0137482	0
Acidaminococcus_sp_D21	0	0	0	0	0	0	0	0	0	0	0	0	0	0	0	0	0	0	0	0	0	0	0	0	0	0	0	0	0	0	1.8252	0	0	0	0	0	0	0	0	0	0	0	0	0	0	0	0	0
Acidaminococcus_unclassified	0.0257648	0.0165437	0.0548013	0.00168522	0.0363489	0.00361354	0	0.0222463	0	0.00438946	0	0.00225267	0.0670469	0.0038853	0	0	0.00527284	0.026953	0.0158541	0.0251922	0.0355555	0.00379818	0.0142057	0.0079066	0.0178282	0.00585966	0.0489241	0.0346795	0.0423704	0	0	0.0496107	0.00437806	0.0382317	0.0169813	0.0154092	0.023944	0.0124503	0.00499869	0.0024744	0.00371158	0.0378993	0	0.0136219	0	0.0066002	0.0285164	0.00664212
Dialister_micraerophilus	0.0252325	0.0341682	0.0471886	0.00187075	0.0454029	0.0205291	0.014598	0.00866137	0	0.0669353	0	0.0465814	0	0.0218231	0.0407948	0.0602083	0.0288064	0.0356641	0.0392646	0.0195818	0.0456573	0.0720143	0.0769129	0.0536409	0.0605231	0.0213092	0.0271975	0	0.0156967	0.0698329	0.0575849	0.0238539	0.0441308	0.0143115	0.0471966	0.0356919	0.0171164	0	0.00192954	0.0472171	0.0496298	0.055604	0	0.0326756	0.0280202	0.00757255	0.0845931	0.0422417
Megamonas_unclassified	0	0.00564966	0.0107541	0	0.014974	0.00542904	0	0.0418633	0	0.00270121	0	0.00538683	0	0	0.020474	0.0772384	0.0494259	0.0172001	0.030164	0.00517323	0	0.0227324	0.0126656	0.00939048	0.0668078	0	0.0069914	0	0	0	0.0136987	0.0124364	0.0249724	0.00132084	0.0292667	0.00411965	0.0126485	0	0	0	0.0218682	0.0263424	0	0	0.00581641	0.0079556	0.0290902	0
Megasphaera_unclassified	5.11107	3.59989	6.84349	6.16877	4.43623	6.65466	7.17413	11.7102	5.79392	9.17031	8.52673	4.802	7.6057	3.34846	0.965774	3.00139	3.8457	4.96436	1.98981	1.40475	6.34075	4.18766	2.31833	2.37907	3.85408	9.42518	10.7202	9.71181	6.69941	4.46578	4.08729	6.38976	4.32127	10.9737	4.07575	4.62899	0.432314	2.24476	1.23712	2.21743	4.52456	2.18315	2.98821	2.38332	2.73102	8.36363	6.99945	2.23121
Mitsuokella_unclassified	5.85899	5.67602	3.57636	1.74326	4.05097	3.29099	3.16212	4.69797	4.7623	4.04694	3.93061	4.64925	4.72796	2.72349	2.3885	1.75091	1.93047	4.09163	3.38213	3.84956	5.98292	2.97375	2.58127	1.68012	3.70039	9.67905	3.74858	6.69131	5.2976	5.56084	2.65942	5.38415	3.5239	5.54887	3.87613	2.64606	2.79632	3.04164	1.59041	3.03868	2.99141	3.32623	4.57691	2.28036	3.27487	6.43246	3.40108	6.24497
Pelosinus_fermentans	0	0.00190369	0	0	0	0.0015711	0	0	0	0.0221081	0	0.00399605	0	0	0	0	0.00924134	0	0.00838002	0	0	0	0	0.0105643	0	0.00259758	0	0	0	0	0.00665006	0.00311659	0.00408035	0	0.0108307	0.00210365	0	0	0	0.0042284	0	0	0	0.00678973	0	0	0.00705474	0
Pelosinus_unclassified	0	0.00391792	0	0	0	0	0	0	0	0	0	0	0	0	0	0	0	0	0	0	0	0	0	0	0.00128261	0	0	0	0	0	0	0	0	0	0	0	0	0	0	0	0	0	0	0	0	0	0	0
Selenomonas_noxia	0	0.00122819	0.00327445	0	0	0.00230429	0	0	0	0	0	0	0	0	0	0	0	0	0	0	0	0	0	0	0	0	0	0	0	0	0.00530746	0.00482472	0	0	0.00570787	0	0	0	0	0	0	0	0	0	0	0	0.00556729	0
Selenomonas_sputigena	0	0.00476536	0.0014627	0	0	0.00593529	0	0	0	0	0	0	0	0	0	0	0	0.0139377	0	0	0	0	0	0.00223688	0.00508233	0	0	0	0	0	0.00696473	0.00519931	0	0	0.00371565	0.00243673	0	0	0	0	0	0	0	0	0	0	0.0117296	0
Veillonella_atypica	0	0.00906402	0	0	0	0	0	0	0	0	0	0	0	0	0	0	0	0.0774088	0	0.0127509	0	0	0.0248024	0.00234762	0	0.00360943	0.00280597	0	0	0	0.0141392	0.00560387	0	0	0.00493312	0	0	0	0	0	0	0.016743	0	0.0286159	0	0	0.00509981	0
Veillonella_parvula	0	0	0	0	0	0	0	0.00288712	0	0	0	0	0	0	0	0	0	0.0322138	0	0.00961783	0	0	0	0	0	0	0	0	0	0	0.0107198	0.0038358	0	0	0.00703601	0	0	0	0	0	0	0	0	0.00681803	0	0	0.00626852	0
Veillonella_unclassified	0.230759	0.0540402	0.0622976	0.0546847	0.274921	0.0974958	0.240189	0.124301	0.0228315	0.124722	0.0209285	0.10613	0.0737572	0.0708796	0.0974356	0.111832	0.120359	0.515199	0.113511	0.303435	0.0835333	0.119161	0.223176	0.139639	0.0895581	0.147745	0.156664	0.0660618	0.0612486	0.332705	0.124002	0.0480075	0.0685079	0.104869	0.0261518	0.102448	0.098246	0.0490932	0.028218	0.155151	0.18603	0.186904	0.00599754	0.382701	0.0449622	0.0595639	0.102336	0.206521
Fusobacterium_gonidiaformans	0	0.0214687	0.0329605	0.0162338	0.0429653	0.0207735	0	0.0670998	0	0.0319321	0	0.0334179	0	0	0.0136085	0.0519485	0.0422382	0.0287635	0.0305964	0.00590185	0.0174379	0.073715	0.0444559	0.0547704	0.0748081	0.00614661	0.0158325	0	0.0171442	0.0428237	0.0319287	0.0261164	0.0656183	0.0303212	0.0509281	0.0266287	0.0157319	0.00977248	0.015527	0.0355968	0.02405	0.0242817	0.0258005	0.00797794	0.00439004	0.0175613	0.0601353	0.00875963
Fusobacterium_necrophorum	0	0.00918684	0.0123664	0	0.0136971	0	0.00907161	0.00353157	0	0.00308709	0	0	0	0	0	0.00503476	0.00477331	0	0.0279815	0.00300557	0	0.00787982	0.0279056	0	0.0189185	0	0.00634869	0	0.0168577	0	0.0230969	0.010099	0.0104023	0	0.0184359	0.00468062	0.00838512	0	0	0	0.00998113	0	0	0.011104	0.00456437	0	0.0337437	0
Fusobacterium_nucleatum	0.104873	0.0553544	0.228231	0.0475109	0.140769	0.0918747	0.0547077	0.18127	0.0576885	0.150432	0.0941169	0.10043	0.0630621	0.0702804	0.209123	0.447444	0.254678	0.123253	0.168424	0.0773616	0.0744862	0.281462	0.289446	0.194166	0.255992	0.0382388	0.0721086	0.0645911	0.0234922	0.138398	0.185677	0.0557241	0.193002	0.0265764	0.120656	0.0802367	0.0599702	0.0837509	0.0243459	0.201381	0.256174	0.134116	0.05434	0.102355	0.0872461	0.0461425	0.126603	0.095632
Fusobacterium_periodonticum	0.0943657	0.0348068	0.159933	0.0530768	0.103574	0.0842112	0.0639183	0.206558	0.067838	0.156718	0.080687	0.0923792	0.00402244	0.0167213	0.153004	0.244917	0.106678	0.125473	0.0608221	0.0737549	0.107299	0.185015	0.0738557	0.158154	0.12576	0.0302649	0.060195	0.050596	0.0728892	0.147852	0.0492566	0.0372642	0.151673	0.0604973	0.0893495	0.0637756	0.0868403	0.0399671	0.019153	0.126147	0.209855	0.193378	0.0367724	0.0502723	0.0811603	0.0348131	0.0776021	0.0957949
Fusobacterium_ulcerans	0.0499525	0.0241584	0.0557487	0	0.0402623	0.0301652	0	0.0615576	0	0.0379616	0.0106487	0.0574334	0	0.016104	0.0535451	0.120509	0.038797	0.0398317	0.0440209	0.0172319	0.0315476	0.0607332	0.071557	0.1182	0.0864317	0.016552	0.0367754	0	0.00675514	0.00988403	0.0433408	0.0312258	0.0546207	0.026141	0.050011	0.0388474	0.028522	0.00861825	0	0.0198891	0.0890026	0.0479108	0.00456506	0.0187284	0.0110306	0.00228355	0.0601778	0.0122888
Leptotrichia_unclassified	0	0	0	0	0.0142278	0	0.0671334	0	0	0	0.081317	0.00111654	0	0	0.0149571	0	0	0.040959	0.00387087	0	0	0	0	0	0	0.00782295	0	0.108782	0.00183957	0	0	0	0.0189657	0.00188691	0.00199222	0.00508382	0.0217415	0	0	0.0144549	0	0	0.00665869	0.0105665	0.023123	0	0	0
Leptotrichia_wadei	0.110313	0.0659536	0.119459	0.0558134	0.110556	0.0655849	0.00472697	0.161318	0.0210305	0.101327	0.00513225	0.084348	0.0728738	0.0764897	0.120055	0.298606	0.195733	0.0850608	0.10299	0.0880359	0.0887599	0.124698	0.108152	0.194122	0.160871	0.0349315	0.0964844	0.0782304	0.0394603	0.119876	0.109464	0.0657181	0.0939006	0.0293487	0.0773804	0.0657741	0.083804	0.0631748	0.0543121	0.0964701	0.135071	0.101076	0.0545131	0.0511493	0.0368954	0.0798801	0.105035	0.0934783
Nitrospina_unclassified	0	0	0	0	0	0	0	0	0	0	0	0	0	0	0	0	0	0	0	0	0	0	0	0	0	0	0	0	0	0	0.000545431	0	0	0	0.00213452	0	0	0	0	0	0	0	0	0	0	0	0.00692724	0
Leptospirillum_unclassified	0	0.0130433	0.00581755	0	0	0	0	0	0	0	0	0	0	0	0	0	0	0	0	0	0	0	0.0171479	0	0	0	0	0	0	0	0.0107828	0.00136351	0	0	0.0206021	0	0	0	0	0	0	0	0	0	0	0	0.00218867	0
Rhodopirellula_unclassified	0.0400764	0.0330996	0.0177518	0	0.0683531	0.0125339	0	0	0	0.0301313	0	0.0627615	0.227963	0.0530326	0	0	0.0238388	0	0.0867034	0	0.0356259	0.0259637	0.0568226	0.10974	0.047232	0.103813	0.0637847	0	0.0288451	0.150817	0.0457113	0.0796079	0.0151131	0.07552	0.00471176	0.109039	0.0624558	0	0.138021	0.0334357	0.0504825	0	0	0.0274843	0.156837	0.0231007	0.0267952	0
Singulisphaera_acidiphila	0	0.00141241	0	0	0	0	0	0	0	0	0	0	0	0	0	0	0	0	0	0	0	0	0	0	0	0	0	0	0	0	0.00117477	0.000284689	0	0	0	0	0	0	0	0	0	0	0	0	0	0	0.000509981	0
Candidatus_Pelagibacter_ubique	0.234229	0.0217389	0.127072	0.0525666	0.113026	0.0553204	0.0458794	0.0614287	0.0573133	0.104768	0.114938	0.187638	0.0302999	0.123767	0.147058	0.392131	0.13307	0.153895	0.178925	0.0868701	0.0600718	0.175397	0.1076	0.15007	0.115162	0.0315334	0.0536112	0.209595	0.0279554	0.337303	0.00811853	0.00623318	0.0278094	0.0658387	0.0828827	0.0618823	0.101927	0.0186677	0.0226754	0.0952956	0.260287	0.175381	0.0575827	0.119146	0.0351203	0.0532583	0.0915628	0.229814
Candidatus_Pelagibacter_unclassified	0	0.00151067	0	0	0	0	0	0.0387442	0	0	0	0	0	0	0	0	0	0	0	0	0	0	0	0	0.036891	0	0	0	0	0	0.00599974	0.0529521	0.0305413	0	0	0	0	0	0.00336699	0	0	0	0	0	0.00996872	0	0	0
Asticcacaulis_benevestitus	0	0	0	0	0	0	0	0	0	0	0	0	0	0	0	0	0	0	0	0	0	0	0	0	0	0	0	0	0	0	0.000377606	0.00205275	0	0	0	0	0	0	0	0	0	0	0	0	0	0	0	0
Asticcacaulis_unclassified	0	0.054249	0	0	0	0.0684304	0	0	0	0	0	0	0.103756	0	0	0	0	0.136319	0	0	0	0	0.0777863	0	0	0.113403	0.0873298	0	0.157509	0	0.0223207	0.101484	0.0825702	0.0824871	0.0644151	0.0426515	0	0.0468463	0	0.225389	0	0	0	0	0.0613496	0	0.0179981	0
Brevundimonas_diminuta	0	0.0254112	0.0190483	0	0.0186553	0.0113643	0.019325	0	0	0	0	0.00352593	0.0126876	0	0	0	0.0106012	0.0135448	0.0166365	0.00342453	0.0193833	0.00857898	0.0218142	0	0.024113	0.00952951	0.0111141	0	0.0257087	0	0.0224885	0.0331587	0.0210322	0.0119891	0.0263574	0.0444396	0.0116731	0.0172365	0	0.0181821	0	0.0124843	0	0.00639367	0.00253576	0	0.0451546	0.0105152
Brevundimonas_unclassified	0.0286823	0.00168262	0	0	0.113491	0.00851888	0.0439677	0.0526642	0	0	0	0.0425266	0	0	0	0.0353593	0.00693795	0.0839335	0.000720641	0.0643375	0.0662594	0.0130952	0.051122	0	0.0542543	0.0492786	0	0.0615074	0.0392944	0.106447	0.0512076	0.0029218	0.00378264	0	0.0357018	0.0171623	0.0989696	0	0.0162134	0	0.0391973	0.116257	0.0679722	0.0525922	0	0.0355645	0.0976826	0.0134652
Caulobacter_unclassified	0.0851204	0.159492	0.0200456	0.144543	0.026731	0.0343723	0	0.0684403	0.0431679	0.368522	0.0130918	0.0983341	0.0817081	0.468433	0.181263	0	0.0366046	0.109127	0.200503	0	0.0375478	0.0768329	0.0316754	0.122453	0.15162	0.294569	0.0703529	0.0808634	0.0205218	0	0	0.0464492	0.0112604	0.00991354	0	0.125027	0.0933061	0.12121	0.14526	0.349642	0	0.0577162	0.34515	0.0752953	0.156916	0.0865835	0	0.170668
Caulobacter_vibrioides	0.0310676	0.062134	0.0867313	0.0184292	0.0393171	0.0786425	0.118835	0.133272	0	0.0241501	0.0393985	0.09044	0.10182	0.0631998	0	0.056148	0.0796476	0.070884	0.0819678	0.0785638	0.069611	0.0923658	0.0794184	0.0425894	0.106937	0.166819	0.0375121	0	0.0790713	0	0.11903	0.107373	0.0918342	0.0355175	0.0796414	0.135615	0.0877213	0.110221	0.0103211	0.0926176	0.192676	0.10822	0.0853666	0.0840513	0.0676732	0.0696115	0.14441	0.103613
Bartonella_bacilliformis	0	0	0	0	0	0	0	0	0	0	0	0	0	0	0	0	0	0	0	0	0	0	0	0	0	0	0	0	0	0	0	0	0	0	0	0	0	0	0	0	0	0	0	0	0	0	0.00446233	0
Bartonella_bovis	0.0144693	0	0	0.025634	0	0.00501008	0	0.0246952	0	0	0	0	0	0	0.0179301	0	0	0	0.0247283	0.0213122	0	0	0	0.0417478	0.0319049	0	0.0344554	0	0.00398071	0	0.00480399	0.0125563	0	0.0214963	0.0018183	0	0	0	0	0.0127009	0	0	0	0	0.00895441	0	0.0111558	0
Bartonella_elizabethae	0	0	0.00177851	0	0	0	0	0	0	0	0	0	0	0	0	0	0	0	0.0084212	0	0	0	0	0	0	0	0	0	0	0	0.00383899	0.00176807	0	0	0.0026721	0	0	0	0	0	0	0	0	0	0	0	0.00575854	0
Bartonella_quintana	0	0	0	0	0	0	0	0	0	0	0	0	0	0	0	0	0	0	0	0	0	0	0	0	0	0	0	0	0	0	0.00308378	0	0	0	0.00284603	0	0	0	0	0	0	0	0	0	0	0	0.0026349	0
Bartonella_rattimassiliensis	0	0	0	0	0	0	0	0	0	0	0	0	0	0	0	0	0	0	0	0	0	0	0	0	0	0	0	0	0	0	0.00356628	0.00337131	0	0	0	0	0	0	0	0	0	0	0	0	0	0	0.00801095	0
Bartonella_tamiae	0	0	0.00473714	0	0	0.00331678	0	0	0	0	0	0	0	0	0	0	0	0	0	0	0	0	0	0	0.00535489	0	0	0	0	0	0.00476203	0.00328141	0.00392274	0	0.00850646	0	0	0	0	0	0	0	0	0	0	0	0.00820219	0
Bartonella_unclassified	8.16757	1.4304	3.04848	3.87852	2.46252	1.34544	2.8477	0.251231	0.34463	0.361769	2.09593	0.502444	0.45619	1.91028	5.93876	0.788416	0.858668	1.49833	0.747593	1.63328	2.42462	1.97392	2.04667	1.71536	0.907878	0.66483	0.412336	0	0.457706	4.22545	1.80582	0.737703	0.782727	0.885252	0.474053	0.374064	0.833258	0.547844	0.184148	1.32582	0.606141	1.1049	0.178352	1.54022	0.618758	0.739517	1.53861	2.43348
Bartonella_vinsonii	0	0	0	0	0	0	0	0	0	0	0	0	0	0	0	0	0	0	0	0	0	0	0	0	0	0	0	0	0	0	0.000860103	0	0	0	0.000505961	0	0	0	0	0	0	0	0	0	0	0	0	0
Bartonella_washoensis	0	0.000638657	0	0	0	0	0	0	0	0	0	0	0	0	0	0	0	0	0	0	0	0	0	0	0	0	0	0	0	0	0.00276911	0	0	0	0.000474338	0	0	0	0	0	0	0	0	0	0	0	0.00325113	0
Afipia_unclassified	0.0199298	0.0316504	0.0238353	0.00708103	0.0335962	0.0140701	0.0367209	0.00569691	0.0249515	0.0313372	0.0248469	0.00950041	0.0117478	0	0.0138843	0	0.030971	0.0430941	0.0250577	0.0178513	0.0219146	0.0172336	0	0.0378498	0.0443622	0.0571921	0.0265234	0	0.00749398	0	0.00669202	0.0179204	0.030121	0.00876688	0.00755779	0.0435455	0.066609	0.0196989	0	0.0202963	0.0242256	0.0492674	0	0.00446991	0.030239	0.00707164	0.0573091	0.037138
Bradyrhizobium_japonicum	0	0	0	0	0	0	0	0	0	0	0	0	0	0	0	0	0	0	0	0	0	0	0	0	0	0	0	0	0.00111581	0	0.00337748	0.00217262	0	0	0.00273535	0	0	0	0	0	0	0	0	0	0	0	0.0103484	0
Nitrobacter_unclassified	0	0.00136329	0	0	0	0	0	0	0	0	0	0	0	0	0	0	0	0	0	0	0	0	0	0	0	0	0	0	0	0	0.000881081	0.00124364	0	0	0.00199222	0	0	0	0	0	0	0	0	0	0	0	0.00286864	0
Oligotropha_carboxidovorans	0	0	0	0	0	0	0	0	0	0	0	0	0	0	0	0	0	0	0	0	0	0	0	0	0	0	0	0	0	0	0.000419562	0	0	0	0	0	0	0	0	0	0	0	0	0	0	0	0	0
Rhodopseudomonas_palustris	0.0718536	0.0501591	0.0309826	0.0830243	0.153173	0.0220129	0.0781166	0.151368	0	0	0.138171	0	0	0.186313	0	0	0.0441531	0.13152	0.0749467	0.0557761	0.125183	0.205178	0.219383	0	0.013259	0.0538545	0.0709329	0	0.16342	0	0.141225	0.0917147	0.108261	0.0397993	0.158587	0.052451	0.0178086	0.0646369	0	0.20561	0.177353	0.072742	0	0	0	0.0202868	0.128366	0.157692
Rhodopseudomonas_unclassified	0	0	0.00392269	0	0	0.0765477	0	0	0	0	0	0.0617233	0	0.0222951	0	0.0968438	0.0495924	0	0.0102949	0	0	0	0	0.0527107	0.0214035	0	0	0	0	0	0	0.000134853	0	0	0	0	0	0	0.0904944	0	0	0	0	0	0.0440589	0	0	0
Brucella_ovis	0	0	0	0	0	0	0	0	0	0	0	0	0	0	0	0	0	0	0	0	0	0	0	0	0	0	0	0	0	0.0511606	0	0	0.0155509	0	0.0165702	0	0	0	0	0	0	0	0	0	0	0	0	0
Brucella_pinnipedialis	0	0.0040653	0	0	0	0	0	0	0	0	0	0	0	0	0	0	0	0	0	0	0	0	0	0	0.00936304	0	0	0	0.0117913	0	0.00765701	0.0112677	0	0.00926038	0.0027986	0	0	0	0	0	0	0.0169319	0	0.0168612	0	0	0.0123245	0
Ochrobactrum_anthropi	0	0	0	0	0	0	0	0	0	0	0	0	0	0	0	0	0	0	0	0	0	0	0	0	0	0	0	0	0	0	0.00155238	0	0	0	0.00086962	0	0	0	0	0	0	0	0	0	0	0	0.00303864	0
Ochrobactrum_unclassified	0	0	0	0	0	0	0	0	0	0	0	0	0	0	0	0	0	0	0	0	0	0	0	0	0	0	0	0	0	0	0.00104891	0.000344623	0	0	0	0	0	0	0	0	0	0	0	0	0	0	0.000552479	0
Hyphomicrobium_denitrificans	0	0.000601811	0	0	0	0	0	0	0	0	0	0	0	0	0	0	0	0	0	0	0	0	0	0	0	0	0	0	0.000889628	0	0.00224466	0.00497456	0	0	0.00292509	0.00280487	0	0	0	0	0	0	0	0	0	0	0.0101359	0
Hyphomicrobium_unclassified	0	0.0461553	0.047787	0	0.0363323	0.0295891	0.0117131	0.00835203	0	0.0221242	0.0382768	0.0160234	0.0296984	0.0268522	0	0	0	0.0475521	0.0318935	0.0589274	0.0389306	0.0138133	0.0718099	0.0527107	0.0878426	0.0159026	0.0324018	0	0.0195718	0	0.0119995	0.039317	0.0260232	0.0157775	0.00947095	0.0645294	0.0460474	0	0.00599583	0.0803709	0	0.0365427	0	0.0219818	0.0166568	0.0465403	0.0933265	0.0252654
Methylobacterium_extorquens	0	0	0	0	0	0	0	0	0	0	0	0	0	0	0	0	0	0	0	0	0	0	0	0	0	0	0	0	0	0	0.0011538	0.00579866	0	0	0.00396863	0	0	0	0	0	0	0	0	0	0	0	0.00743722	0
Methylocystis_unclassified	0	0.003181	0	0	0	0.00125688	0	0	0	0	0	0	0	0	0	0	0	0	0	0	0	0	0	0	0	0	0	0	0.00465924	0	0.00289498	0.012811	0	0	0.00698858	0	0	0	0	0	0	0	0	0	0	0	0.0121758	0
Methylosinus_unclassified	0	0.0146523	0.0343401	0.0335808	0	0.0113643	0.0815228	0	0	0	0	0	0	0.0200257	0	0	0.0215909	0	0	0.0157201	0.0262272	0	0	0.0188474	0.0226541	0	0	0	0.0123794	0	0.00597876	0.0135302	0.00793304	0	0.0217405	0.0139191	0.0353339	0.0176059	0	0.0530899	0	0.0815342	0.00886251	0.0140746	0.0327272	0.0167952	0.0256903	0.00656973
Mesorhizobium_loti	0.0291554	0.0327066	0.0616992	0.030365	0.0723495	0.0373399	0.033193	0	0.019661	0.0273658	0	0.0675019	0.0488895	0.0533957	0.00686554	0	0.0322753	0.0529324	0.0283933	0.0440271	0.021938	0.0392101	0.051053	0.0313828	0.0384943	0.0280297	0.0537993	0	0.04902	0.00754195	0.0351803	0.0422388	0.0210147	0.0204803	0.0248395	0.0244199	0.024353	0.0551722	0.0162652	0.0191061	0.0149466	0.0554151	0.0322703	0.00408799	0.0783392	0.00689485	0.0591365	0.0133385
Mesorhizobium_unclassified	0.0328811	0	0	0	0.0295334	0	0	0.0451113	0	0	0.0127384	0	0	0.00942277	0	0.0353826	0.00219239	0	0.0330671	0	0.0285944	0.0167611	0	0.0190024	0.00809646	0.011372	0	0	0	0	0.0157965	0	0.00255679	0	0.0138823	0.0255944	0.0204987	0	0	0.0398722	0	0	0.000251865	0.0257161	0	0.00430192	0.000573729	0.0689369
Nitratireductor_unclassified	0.0215068	0.00515838	0.0160897	0	0.0428658	0.0197785	0.0427512	0	0	0.00537026	0	0.0314003	0	0.0269974	0	0.0237353	0.0701565	0.0167218	0.0434649	0.0475973	0.0372431	0.0387188	0.0236071	0.0192018	0.0288106	0.00783806	0	0	0.0250001	0	0.0226773	0.0317802	0.0202967	0.0126423	0.0135977	0.0157774	0.0165815	0.0197604	0	0.0926332	0	0.0354437	0.00763467	0	0.00402552	0.0399843	0.0246066	0.035853
Agrobacterium_tumefaciens	0	0.00366	0	0	0	0	0	0	0	0	0	0	0	0	0	0	0	0	0.0119626	0	0	0	0	0	0	0	0	0	0.000874549	0	0.00570605	0.00311659	0	0	0.00683047	0	0.00948636	0	0	0	0	0	0	0	0	0	0.0115383	0
Agrobacterium_unclassified	0	0	0	0	0	0	0	0	0	0	0	0	0	0	0	0	0	0	0	0	0	0	0	0	0	0	0	0	0	0	0	0.00491462	0	0	0	0	0	0	0	0	0	0	0	0	0	0	0.00747972	0
Candidatus_Liberibacter_americanus	0.0109012	0.00233356	0.0174693	0	0	0.00434672	0	0.0446473	0	0.00270121	0	0	0	0	0.0163976	0.0382364	0.0282791	0	0.0258607	0	0	0.0389834	0.0390311	0.026001	0.0122329	0	0	0	0	0	0.0146217	0.00540908	0.0132392	0	0.0212503	0.0125868	0	0	0	0.03176	0.0262067	0.0140985	0	0	0	0	0.0323413	0.0317084
Candidatus_Liberibacter_asiaticus	0	0	0	0	0	0	0	0	0	0	0	0	0	0	0	0	0	0	0	0	0	0	0	0	0	0	0	0	0	0	0	0	0	0	0	0	0	0	0	0	0	0	0	0	0	0	0.00237991	0
Candidatus_Liberibacter_unclassified	0.0165194	0.0189141	0	0	0	0.00570835	0	0.0417602	0	0.0178955	0.071621	0.0436627	0.343599	0	0	0.0372387	0	0.0589106	0.11417	0.0205472	0.074369	0	0.037491	0	0.0433842	0	0.110937	0.0560991	0.123432	0	0	0.236891	0	0.0840547	0.0136609	0.0147781	0.0569496	0	0.11058	0.0157547	0.0105579	0.102794	0.0308378	0	0.094584	0.0160733	0	0
Rhizobium_etli	0	0.0156839	0.00826091	0	0	0.010282	0	0	0	0	0	0	0	0	0	0	0.0167343	0.00459465	0.00794764	0.010565	0	0	0	0	0.00965162	0	0	0	0.0112334	0	0.0152301	0.0161823	0	0	0.00803212	0.0193886	0	0.00466309	0	0.046528	0	0.0174986	0	0.00485183	0	0.00215096	0.0307264	0.0140987
Rhizobium_leguminosarum	0	0.00510926	0	0	0	0	0	0	0	0	0	0	0	0	0	0	0	0	0	0	0	0	0	0	0	0	0	0	0.00283475	0	0.00610463	0.00296676	0	0	0.00368403	0	0	0	0	0	0	0	0	0	0	0	0.00533355	0
Sinorhizobium_fredii	0	0	0	0	0	0	0	0	0	0	0	0	0	0	0	0	0	0	0	0	0	0	0	0	0	0	0	0	0	0	0	0.000464492	0	0	0	0	0	0	0	0	0	0	0	0	0	0	0	0
Sinorhizobium_unclassified	0	0.00271429	0	0	0	0	0	0	0	0	0	0	0	0	0	0	0	0.0385677	0	0	0	0	0	0	0	0	0	0	0.0389175	0	0	0.0130657	0	0	0.0118426	0	0	0.00660219	0	0	0	0.0112994	0	0	0	0	0	0
Hirschia_unclassified	0	0.00912543	0.0139122	0.00199444	0.00601945	0.00658118	0	0	0	0.0131845	0	0	0	0	0	0	0.00629966	0.0043726	0.0186749	0.0100732	0.00307039	0	0.00498807	0.014285	0.00705434	0.00889521	0.00686599	0	0.0117009	0	0.00866396	0.00819604	0.00828329	0.00267071	0.00722575	0	0.00734682	0.00746402	0	0.00577881	0	0.0141328	0	0.00243299	0.0096042	0	0.00975339	0.00264237
Oceanicaulis_unclassified	0	0.00179315	0.00478701	0	0.00616869	0	0	0	0	0	0	0	0	0	0	0	0	0	0.00387087	0	0	0	0	0	0.00567554	0	0	0	0.00844393	0	0.00962895	0.0114625	0	0	0.00978718	0	0	0.00156975	0	0	0	0	0	0	0	0	0.014152	0.0108771
Ketogulonicigenium_vulgare	0	0.00300906	0	0	0	0	0	0	0	0	0	0	0	0	0	0	0	0	0	0	0	0	0	0	0	0	0	0	0.00263873	0	0.00782484	0.00945466	0	0	0.00670398	0.00289252	0	0	0	0	0	0	0	0	0	0	0.00756472	0
Labrenzia_unclassified	0	0	0.0869307	0.0324831	0.0836919	0	0	0.0443895	0.055456	0	0.0674415	0.0808416	0	0	0	0	0.0293614	0	0	0	0.0479074	0.115344	0	0	0	0.167469	0	0	0	0	0.0129855	0.00654784	0	0	0	0	0.0510344	0.0220381	0	0.283365	0.12346	0.0382256	0.109105	0	0	0	0.0139182	0
Loktanella_vestfoldensis	0	0.0115204	0.00186161	0	0	0.00387539	0	0	0	0	0	0	0	0	0	0	0	0	0	0	0	0	0.00599948	0	0.00641304	0	0	0	0.00606153	0	0.0145169	0.0147439	0.00318723	0	0.006451	0.00331325	0	0.00881832	0	0	0	0	0	0.0028432	0	0	0.0225454	0
Oceanicola_unclassified	0.0806258	0.0809252	0.0365674	0.0467224	0.0687511	0.0692857	0.068037	0.0354188	0	0.15384	0.0270749	0.0808025	0	0.0266343	0	0.0786073	0.0717939	0.11625	0.118453	0.119367	0.0378993	0.0136999	0.0446398	0.0280164	0.118513	0.0628857	0.0432808	0	0.0508445	0	0.0707172	0.0287985	0.0436055	0.0544447	0.0195902	0.0656514	0.0320932	0.0518942	0	0.101544	0	0.0142187	0.0230772	0.124394	0.0337573	0	0.0672537	0.15257
Paracoccus_denitrificans	0.0501102	0.0455166	0.0415705	0.0104824	0.0551534	0.0295193	0.0400749	0.0123734	0.011669	0.0401644	0.0234639	0.0249165	0.00349614	0.0705165	0	0	0.0281126	0.0520272	0.0652283	0.0509126	0.0294148	0.0681028	0.0503864	0.0513154	0.0454684	0.0373327	0.016052	0	0.0366406	0.00921794	0.0437184	0.0473782	0.0391749	0.0178821	0.0397179	0.0506629	0.0314167	0.0355964	0.0226883	0.0574279	0	0.0625416	0.0316091	0.0339911	0.0343279	0.0292442	0.0775171	0.0632902
Paracoccus_unclassified	0	0	0	0	0	0	0	0	0	0	0	0.0198235	0.0377057	0	0	0	0	0	0.00471505	0	0.00883615	0.0179327	0	0	0	0	0	0	0.0247739	0	0	0.0255321	0.00563894	0.0189562	0	0	0.00493983	0	0	0	0	0	0	0	0	0.0119187	0	0.0326314
Phaeobacter_unclassified	0	0	0	0	0	0	0	0	0	0	0	0	0	0	0	0	0	0	0	0	0	0	0	0	0	0	0	0	0	0	0.00148945	0.00130357	0	0	0	0	0	0	0	0	0	0	0	0	0	0	0.00348487	0
Rhodobacteraceae_noname_unclassified	0	0	0	0	0	0	0	0	0	0	0	0	0	0	0	0	0	0.0868031	0	0	0	0	0	0	0	0	0	0	0	0	0	0	0	0.0525287	0	0	0	0	0.0800049	0	0	0.0479967	0	0	0	0	0.0465995	0
Rhodobacter_capsulatus	0	0.0191351	0.0124828	0	0.0168478	0.013302	0	0	0	0	0	0.0114005	0	0	0	0	0.0280571	0.00620022	0.0256548	0.0176327	0	0.0187831	0.0103899	0	0.00782391	0.00736989	0	0	0.0208082	0	0.0203068	0.0280493	0	0	0.0227524	0.0237537	0.0147408	0	0	0.00413443	0	0	0	0	0	0.00558365	0.0246491	0.0218448
Rhodobacter_sphaeroides	0	0.0142224	0.00806146	0	0	0.0126038	0	0	0	0	0	0	0	0	0	0	0.0265862	0	0.0216192	0.00344275	0	0.00608465	0.00321811	0	0.00527472	0.00241636	0	0	0.0169934	0	0.0180202	0.016452	0.00520113	0	0.0180407	0.0193711	0.00240699	0.0116192	0	0.00759546	0	0.0064568	0	0	0.0101272	0.0154103	0.0305989	0.010479
Roseovarius_unclassified	0	0.00316872	0	0	0	0	0	0	0	0	0	0	0	0	0	0	0	0	0	0	0	0	0	0	0	0.00595028	0	0	0	0	0.00272716	0.00693741	0	0	0.00496474	0	0	0	0	0	0	0	0	0	0	0	0.00696974	0
Sulfitobacter_unclassified	0	0	0	0	0	0	0	0	0	0	0	0	0	0	0	0	0	0	0	0	0	0	0	0	0	0	0	0	0	0	0.00253835	0.00116872	0	0	0.00145464	0	0	0	0	0	0	0	0	0	0	0	0.0013387	0
Acetobacter_aceti	0	0.000564966	0	0	0	0	0	0	0	0	0	0	0	0	0	0	0	0	0	0	0	0	0	0	0	0	0	0	0.000844393	0	0	0.000674263	0	0	0	0	0	0	0	0	0	0	0	0	0	0	0.000616227	0
Acetobacter_pasteurianus	0	0	0	0	0	0	0	0	0	0	0	0	0	0	0	0	0	0	0	0	0	0	0	0	0	0	0	0	0	0	0.000608365	0	0	0	0	0	0	0	0	0	0	0	0	0	0	0	0	0
Acetobacter_unclassified	0	0	0	0	0	0	0	0	0	0	0	0	0	0	0	0	0	0	0	0	0.100104	0	0	0	0	0	0.0467295	0	0.0261611	0	0	0.0236591	0	0	0	0	0	0	0	0.0939487	0	0	0	0	0.0629345	0	0.0638964	0
Acidiphilium_unclassified	0	0.0173911	0.0115354	0	0.0197995	0.0053243	0	0	0	0	0	0	0	0	0	0	0.00985188	0.0103166	0.0107684	0.0215308	0	0.00428949	0.0235842	0.00232547	0.00910652	0.00173676	0	0	0.0173553	0	0.0186705	0.0133954	0.00126088	0	0.0122379	0.0165487	0.0087155	0.00292405	0	0.0221599	0	0.0134803	0	0	0.00374025	0	0.0408622	0
Gluconacetobacter_diazotrophicus	0	0.00485134	0	0	0	0	0	0	0	0	0	0	0	0	0	0	0	0	0	0	0	0.00239985	0	0	0.00859347	0	0	0	0.0044783	0	0.00834929	0.00593351	0	0	0.00781077	0.00143749	0	0.00469387	0	0	0	0	0	0	0	0	0.0105821	0.00562861
Gluconacetobacter_unclassified	0.469995	0.0869802	0.14484	0.0825605	0.153935	0.126177	0.105384	0.102106	0.101269	0.0179437	0	0.130792	0	0.126291	0.0275541	0.0569833	0.039352	0.16001	0.113511	0.0703122	0.105565	0.132672	0.303307	0.0970497	0.205939	0.0364568	0.0284829	0	0.0588813	0.0595621	0.0207054	0.0152084	0.00861602	0.0089846	0.0459317	0.0616369	0.0849367	0.0248544	0	0.0398252	0.0907079	0.114488	0.132639	0.0961313	0.0790366	0	0.176177	0.0486666
Gluconobacter_oxydans	0	0	0	0	0	0	0	0	0	0	0	0	0	0	0	0	0	0	0	0	0	0	0	0	0	0	0	0	0	0	0	0	0	0	0	0	0	0	0	0	0	0	0	0	0	0	0.000488732	0
Gluconobacter_unclassified	0	0.00170718	0	0	0	0	0	0	0	0	0	0	0	0	0	0	0	0	0	0	0	0	0	0	0	0	0	0	0	0	0.000818146	0.00290682	0	0	0.000917054	0	0	0	0	0	0	0	0	0	0	0	0.00512106	0
Roseomonas_unclassified	0.139784	0.0617041	0.0544024	0.0274738	0.198675	0.0153619	0	0	0.0517415	0.0178794	0.0311623	0.0544755	0.0225369	0.0309554	0	0	0.027946	0.106036	0.0897095	0.0179241	0.0642672	0.0786848	0.0893486	0	0.0342296	0.05319	0.0462436	0	0.102744	0	0.0202229	0.11431	0.0631841	0.00883946	0.0886696	0.0322209	0.0366554	0.0406751	0	0.0981615	0.0314732	0.0162107	0.0284608	0	0.0551687	0.0802779	0.0250953	0.0369208
Azospirillum_lipoferum	0.0196735	0.0271184	0.0341241	0	0.0266149	0.036921	0.0298042	0.0136107	0	0	0	0.00922617	0	0.0207337	0	0	0.0448469	0.0338023	0.0211868	0.00865241	0.0340789	0.0251701	0.047697	0.00274627	0.0227984	0.0268669	0.00634869	0	0.0303831	0	0.0284673	0.0414896	0.0255153	0.008883	0.0410144	0.0275929	0.024353	0.0235617	0.00681168	0.0456824	0.0246519	0.0328163	0.0218651	0	0.0153889	0.0113441	0.0460895	0.014895
Azospirillum_unclassified	0.159615	0.171983	0.0992307	0.193461	0.143986	0.149709	0.127107	0.226459	0.0144831	0.171446	0.117197	0.090342	0.101482	0.146698	0.224387	0.0664496	0.0618865	0.158217	0.120223	0.162993	0.235037	0.132521	0.105968	0.178862	0.12879	0.0822316	0.0657442	0.0810532	0.0789055	0.0958751	0.147686	0.219705	0.0467577	0.0923716	0.175458	0.043826	0.143853	0.110252	0.0505308	0.259592	0.299484	0.210979	0.147577	0.138072	0.132605	0.0999606	0.100403	0.268454
Magnetospirillum_unclassified	0	0.0143084	0.00814456	0	0	0.00591783	0	0	0	0	0	0.0107737	0	0	0	0	0	0.0028866	0	0	0.00417197	0	0.00335603	0	0	0	0	0	0.0164355	0	0.0145169	0.0193289	0.00530621	0	0.0153527	0.01441	0	0	0	0	0	0.00327992	0	0	0.00513492	0.00548052	0.0251378	0
Phaeospirillum_unclassified	0	0.00756563	0.0135964	0	0.0131997	0.0129354	0	0	0	0	0	0	0	0	0	0	0	0.0049875	0.0221752	0	0	0	0.00285033	0	0.0134353	0	0	0	0.0176418	0	0.00679691	0.0130807	0.00145352	0.0014805	0.00931284	0.00303276	0	0.00337035	0	0	0	0	0	0	0.00857405	0	0.0225454	0.00591818
Rhodospirillum_rubrum	0	0.0114467	0.00621646	0	0.00298485	0.00207735	0	0	0	0	0	0	0	0	0	0	0.00813127	0	0.0159776	0	0	0.00226757	0.00498807	0	0.0115755	0	0	0	0.00876057	0	0.00822342	0.0062182	0	0	0.0133605	0.00520653	0	0	0	0	0	0.00716086	0	0	0	0.011624	0.0225667	0
Rhodospirillum_unclassified	0.819072	0.59739	1.1424	0.474584	0.811879	0.979183	1.21156	1.05653	0.879755	0.513069	1.07006	1.92386	0.258789	2.34789	0.950357	0.335427	0.641344	1.10495	0.943628	1.20678	0.849513	1.32375	1.05929	0.46722	1.16794	1.76784	0.271567	1.37344	1.2353	1.02727	1.09564	0.56187	0.566398	0.514372	0.789899	1.48018	0.709023	0.582701	0.0783473	1.48064	1.89117	1.40308	1.21405	0.842521	1.22086	1.08958	1.20957	1.2424
Thalassospira_unclassified	0	0.00491275	0	0	0	0.00260105	0	0	0	0	0	0	0	0	0	0	0	0	0	0	0	0	0	0	0	0	0	0	0.00806697	0	0.00809755	0.0062182	0	0	0.00564462	0	0	0	0	0	0	0	0	0	0	0	0.0123883	0
Anaplasma_marginale	0	0	0	0	0	0	0	0	0	0	0	0	0	0	0	0	0	0	0	0	0	0	0	0	0	0	0	0	0	0	0.000650322	0	0	0	0	0	0	0	0	0	0	0	0	0	0	0	0	0
Ehrlichia_chaffeensis	0	0	0.00483687	0	0.00245421	0	0	0	0	0.00213846	0	0	0	0	0	0.0269139	0.00840879	0	0.00607397	0	0	0.00190854	0.00390771	0.00199326	0.0106617	0	0	0	0	0	0.00484594	0.00370095	0	0	0.00970812	0	0	0	0	0.0200614	0.0103072	0.00188896	0	0	0	0	0.0143007	0
Ehrlichia_ruminantium	0	0.00194053	0.0111364	0	0	0.00256614	0	0.00703736	0	0.00217061	0	0	0	0	0	0.030487	0.00321921	0.00536327	0.0115303	0	0	0.00185185	0.0100681	0	0.0178443	0	0	0	0	0	0.00700669	0.0035661	0.00819572	0	0.0185941	0	0.00157319	0	0	0	0.0136676	0	0	0	0	0	0.0153207	0
Ehrlichia_unclassified	0.033098	0.0104764	0.182388	0.0345394	0.0737756	0.0405171	0	0.0934964	0	0.077306	0.0376621	0.0377666	0	0.273769	0.144391	0.436377	0.202255	0.176715	0.115035	0.0206018	0.076244	0.0521731	0.221544	0.195185	0.00378369	0.0148153	0.0433435	0.0313823	0.0319814	0.0756558	0	0.016437	0.122008	0.0160823	0.018009	0.0469114	0.0369071	0	0.00799013	0.109735	0.175924	0.104545	0.0630765	0.0305397	0.0432823	0.0466139	0	0.0363959
Neorickettsia_unclassified	0	0	0	0	0	0	0	0	0	0	0	0	0	0	0	0	0	0	0	0	0	0	0	0	0	0	0	0	0	0	0	0	0	0	0	0	0	0	0	0	0	0	0	0	0	0	0.00101996	0
Wolbachia_endosymbiont_of_Culex_quinquefasciatus	0	0	0.0196467	0	0	0.00670338	0	0.0195912	0	0.01677	0	0.0349262	0	0.0265072	0.0235084	0.0657999	0.039574	0	0.0289492	0	0.0198286	0.0143613	0.032319	0	0.0201209	0	0	0	0	0.0272456	0	0	0.017197	0.00840402	0	0	0.0231574	0.00926462	0	0.0167726	0	0	0	0	0.0124728	0	0.00533355	0.0164696
Wolbachia_endosymbiont_of_Drosophila_melanogaster	0	0.00353718	0	0	0	0	0	0	0	0	0	0	0	0	0	0	0.0188157	0	0.00897713	0	0	0	0.00786139	0	0.00218043	0	0	0	0	0	0.00409073	0.00657781	0.00991192	0	0.0035101	0	0	0	0	0	0	0	0	0	0	0	0.0190605	0
Wolbachia_pipientis	0	0	0	0	0	0	0	0	0	0	0	0	0	0	0	0.211112	0	0	0	0	0	0	0.121783	0	0	0	0	0	0	0	0	0	0	0	0	0	0	0	0	0	0	0	0	0	0	0	0	0
Wolbachia_unclassified	0	0.00416355	0	0	0	0.00263597	0	0	0	0	0	0	0	0	0	0	0	0.00671263	0	0.00801486	0	0	0	0.0110958	0	0	0.00322921	0	0	0	0.00427954	0	0	0	0.0104829	0.00212118	0	0	0	0	0	0.0019233	0	0	0	0	0	0
Holospora_unclassified	0	0.00241953	0	0	0	0.00429435	0	0	0	0	0	0	0	0	0	0.0177261	0.0119888	0.00852316	0	0.00497286	0	0	0	0.00947907	0.00277364	0	0.00260218	0	0	0	0	0.0106234	0.0025743	0.00243847	0.0100876	0.0132004	0	0	0	0.0109155	0.0174544	0.0136692	0	0	0	0	0.00505731	0
Orientia_tsutsugamushi	0	0.00550228	0.00762929	0	0	0.0121499	0	0.00976982	0	0	0	0	0	0	0.00334082	0.0068677	0.0139869	0	0.0246871	0.0143903	0	0.00394936	0.011976	0.00772942	0.0107418	0	0	0	0.000708687	0.0105931	0.0117477	0.00867551	0.0109802	0	0.0231003	0.0085899	0.00442067	0	0	0.00238043	0	0	0	0.00379094	0	0	0.0205267	0
Rickettsia_bellii	0.00346947	0.00993603	0.0268106	0	0.0359177	0.0190453	0	0.0423788	0	0.0189084	0	0.013183	0	0.00902335	0.0262362	0.0861246	0.0237278	0.0353395	0.0422707	0.0120223	0	0.0302343	0.0143666	0.021638	0.0252513	0	0.0121487	0	0.00420688	0	0.0120834	0.0098742	0.0194211	0.00132084	0.0330772	0.0116753	0.0182491	0	0	0.0374605	0.0330782	0.0203664	0	0	0.0111732	0	0.0275177	0.00530284
Rickettsia_canadensis	0	0	0	0	0	0	0	0	0	0	0	0	0	0	0	0.0393036	0	0.00348442	0	0	0	0.0151172	0	0.0182937	0.0145095	0	0	0	0	0	0	0	0.0244646	0	0.005613	0.0170396	0	0	0	0.0146898	0.0451157	0	0	0	0	0	0.0223754	0.00819858
Rickettsia_conorii	0	0	0	0	0	0	0	0	0	0.060327	0	0	0	0	0	0	0.0258092	0	0	0	0	0.0527022	0.0406401	0	0.0935502	0.0242844	0.0541912	0	0.0187425	0	0.0681998	0	0.0304187	0.0294358	0.0292983	0	0	0	0	0	0.0983568	0	0	0	0	0	0.0203567	0
Rickettsia_prowazekii	0.090916	0.0058216	0.0365342	0	0.0388362	0.0351753	0	0.107777	0	0.0624976	0.0173329	0.0241134	0.00419161	0.0383265	0.0793216	0.101113	0.0809797	0.046049	0.0750702	0.0186892	0.0306101	0.0712585	0.0346407	0.110382	0.0662146	0	0.0185131	0.0263773	0.00904706	0.034852	0.0062305	0.0185048	0.0457595	0.0217866	0.0635613	0.0309236	0.0241013	0.00381665	0.00731673	0.0754534	0.0909336	0.0741845	0.00988572	0.0444586	0.0311899	0.0303344	0.0396298	0.0349661
Rickettsia_rickettsii	0	0	0	0	0	0	0	0	0	0	0	0	0	0	0	0	0	0	0	0	0	0	0.102681	0	0	0	0	0	0	0	0	0	0	0	0	0	0	0	0	0	0	0	0	0	0	0	0	0
Rickettsia_typhi	0.0428953	0.0342664	0.0491167	0.0364256	0.0766941	0.027442	0	0.0287939	0	0	0	0.0165131	0	0.0294666	0.1203	0.0599763	0	0.038619	0.0883712	0.0160297	0.0532747	0	0.0196994	0.10768	0.0286983	0.0123687	0	0.0410603	0.0127865	0	0	0	0	0	0.137131	0.0622855	0.0329427	0.0458152	0	0.0187146	0.0922628	0.0692904	0	0.0300587	0.0501923	0.0715415	0.0501694	0.0316722
Rickettsia_unclassified	0	0	0	0	0	0	0	0	0	0	0	0	0	0	0	0	0	0	0	0	0	0	0	0	0	0	0	0	0	0	0	0	0	0	0	0	0	0	0	0	0	0	0.00291219	0	0	0	0	0
Blastomonas_unclassified	0.0102507	0.031024	0.0134801	0	0	0.0216812	0	0.017761	0	0.00263689	0	0.0155532	0.00325178	0.022277	0.00395382	0	0.0344122	0.00440677	0.0166983	0.0176145	0.0149769	0.0134354	0.0583398	0.00241406	0.0158883	0.0270632	0.0132147	0	0.0300664	0	0.0232857	0.0310311	0.00649704	0.00907169	0.0170762	0.0300471	0.025234	0.0156975	0	0.0550475	0	0.0335376	0	0.0246977	0.0242482	0.00976771	0.0310026	0.0384229
Citromicrobium_unclassified	0	0.028887	0.0458589	0.010838	0.0654677	0.039714	0	0.0197201	0.00842346	0.0280893	0	0.0208617	0	0.0204614	0	0.0182829	0.039463	0.0140572	0.0339731	0.0493825	0.0165004	0.0402683	0.0248024	0.0260453	0.037388	0.0218831	0.0192499	0	0.0329313	0	0.0306071	0.0445613	0.0237116	0.0262861	0.0417576	0.0589197	0.0535201	0.0228076	0.00681168	0.0591976	0	0.0330911	0.012546	0.0179645	0.0444868	0.00223935	0.0485757	0.0559422
Sandarakinorhabdus_unclassified	0	0.0244041	0.0192644	0	0.0278752	0.0250853	0	0	0	0.00551496	0	0	0	0.0144882	0	0	0	0.0201208	0.0153599	0.00271412	0.00656266	0	0.0199983	0	0.0206981	0.0184247	0.00576869	0	0.0147166	0	0.0228242	0.030177	0.0202441	0.006909	0.0233532	0.0299595	0.0329427	0.0112653	0	0.0418611	0	0.0295021	0	0.00267346	0.00207616	0.00827972	0.0469395	0.00562861
Sphingobium_unclassified	0.0313041	0.0255831	0.158852	0	0.0260677	0.0152572	0	0	0.0665622	0.0236034	0	0.0237608	0.135692	0.150819	0	0.147586	0.0520901	0.057715	0.0499095	0.0227148	0	0.0844671	0.0926126	0.0209292	0.0389913	0	0.012666	0.0613651	0.0596654	0	0.0258031	0.0487117	0.0767386	0.0584362	0.05077	0.0317125	0.0635098	0.0398132	0.0543121	0.0224418	0.0382694	0.0154551	0	0.0654361	0.0538374	0.0357413	0.059009	0.17351
Sphingobium_xenophagum	0	0	0	0	0	0	0	0	0	0	0	0	0	0	0	0	0	0	0	0	0	0	0	0	0	0	0	0	0	0	0.000482497	0.00125862	0	0	0.000537583	0	0	0	0	0	0	0	0	0	0	0	0.00303864	0
Sphingobium_yanoikuyae	0	0.00652167	0	0	0	0.00387539	0	0	0	0	0	0	0	0	0	0	0.00246991	0	0.00224428	0	0	0	0.00303422	0	0.00160326	0	0	0	0.00392039	0	0.00981776	0.00863056	0	0	0.00695696	0.00641613	0	0.00352425	0	0.003508	0	0.00559818	0	0	0	0	0.0140882	0
Sphingomonas_melonis	0	0.00280027	0	0	0	0	0	0	0	0	0	0	0	0	0	0	0	0	0	0	0	0	0	0	0	0	0	0	0.0104494	0	0.00736332	0.0127211	0	0	0.00567625	0	0	0.0048016	0	0	0	0	0	0	0	0	0.00643851	0
Sphingomonas_wittichii	0	0.0235321	0.017569	0	0.010248	0.00509736	0	0	0	0	0	0.00313416	0	0.0216778	0	0	0.0277518	0.0148771	0.0252224	0.0234799	0.0242818	0.0154384	0.0250783	0.0134434	0.0125054	0	0.00633301	0	0.0138269	0	0.0148315	0.0241236	0.00306464	0.00600909	0.0172659	0.0278558	0.00213954	0.0121425	0	0.0201867	0	0	0	0	0	0.00917841	0.0199105	0.042115
Sphingopyxis_unclassified	0.0206394	0.0294642	0.0423185	0.0142394	0.0328002	0.0297812	0.0392755	0.0527415	0.0519666	0.0131523	0	0	0.0161273	0.0373098	0.0120454	0	0.0504527	0.0238614	0.0466975	0.039455	0.0441339	0.0415911	0.0406861	0.00708715	0.0450035	0.0254322	0.0361483	0.0141849	0.027096	0.00466269	0.0192789	0.0202728	0.0263209	0.0169387	0.0169971	0.0468412	0.0366869	0.0316105	0	0.0734958	0	0.0573212	0.00410855	0	0.036721	0.0346805	0.0364211	0.0429113
Zymomonas_mobilis	0	0	0	0	0	0	0	0	0	0	0	0	0	0	0	0	0	0	0	0	0	0	0	0	0	0	0	0	0	0	0.000985971	0.00260715	0	0	0	0	0	0	0	0	0	0	0	0	0	0	0.00390985	0
Achromobacter_piechaudii	0.0226107	0.0182509	0.0301515	0.0112554	0.0406603	0.0188533	0.0265197	0.0287166	0	0.0275909	0	0.00587654	0.0146236	0.0152326	0.0132407	0	0.0419607	0.0540939	0.0350643	0.02011	0.0358837	0.0225623	0.0116312	0.0286587	0.037404	0.0285281	0.0138887	0	0.0087455	0.00481309	0.015377	0.0243783	0.00436055	0.0194642	0.0247921	0.0355517	0.0303941	0.051217	0	0.0422527	0.0279371	0.0323355	0	0.0442181	0.027624	0.0124785	0.0492132	0.0416264
Achromobacter_unclassified	0	0	0	0	0	0	0	0	0	0	0	0	0	0	0	0	0	0	0	0	0	0	0	0	0	0	0.00432652	0	0.00937879	0	0	0	0.00602421	0	0	0	0	0	0	0	0	0	0	0	0	0	0	0
Achromobacter_xylosoxidans	0	0.0227706	0.00925821	0	0	0.00656373	0.0184386	0	0	0.00319964	0	0.00981382	0	0	0	0	0	0.0104191	0	0.0122955	0	0.018802	0	0	0.00652527	0.0320016	0	0	0.0269452	0	0.0161951	0.0242735	0.00481586	0	0.020444	0.012955	0	0.0139585	0	0.00353933	0	0	0	0	0.00700504	0	0.0298551	0.0127775
Advenella_kashmirensis	0	0	0	0	0	0.00144891	0	0	0	0	0	0	0	0	0	0	0	0	0	0.0102189	0	0	0	0	0	0	0	0	0	0	0.0131323	0.00527423	0	0	0.00392119	0	0.00481397	0	0	0	0	0	0	0	0	0	0.00939215	0
Bordetella_bronchiseptica_parapertussis	0.0488683	0.0569019	0.0466235	0.00963206	0.075782	0.046173	0.0577316	0.0519682	0.034932	0.0724502	0.0300559	0.0284033	0.018928	0.0556833	0.0115856	0.0243618	0.104291	0.0783482	0.0405	0.0647018	0.0551263	0.0811602	0.0738557	0.0199991	0.0681225	0.0653926	0.0429046	0.0334223	0.0508747	0.00833697	0.0389564	0.0568328	0.0569498	0.0443715	0.0643044	0.0667383	0.0485016	0.0514633	0.0134291	0.103846	0.0485264	0.0614941	0.0181815	0.0292241	0.0545348	0.0672838	0.0805982	0.118364
Bordetella_holmesii	0	0	0	0	0	0	0	0	0	0	0	0	0	0	0	0	0	0	0	0	0	0	0	0	0	0	0	0	0	0	0.0022027	0.0011837	0	0	0.00101192	0	0	0	0	0	0	0	0	0	0	0	0.00499356	0
Bordetella_pertussis	0	0.013989	0.0273258	0	0.0551037	0.0107708	0.0117827	0	0	0.00808754	0.0136758	0.00278156	0	0	0	0	0	0.0195059	0.0129921	0.00763233	0.0277507	0.0090514	0	0.0142629	0.0138522	0	0.0231845	0	0	0	0.00876885	0.0152983	0.0266361	0.0129907	0	0.0385318	0.00909306	0.015005	0	0.0148151	0	0.0165198	0	0	0.0117596	0.0140107	0.0675937	0.0396355
Bordetella_unclassified	0.0157703	0.191597	0.092366	0	0	0.059283	0	0	0	0.0609379	0	0.152712	0.104358	0.0294484	0	0	0	0.136541	0.0138363	0.066323	0.182629	0	0.192949	0.0516476	0.140013	0.183764	0.0569344	0	0.0731455	0	0.0399213	0.0654784	0.0298058	0	0	0.315284	0.105357	0	0	0.230354	0.109517	0.267665	0.051538	0	0	0	0.0199105	0.175084
Oligella_unclassified	0	0	0	0	0	0	0	0	0	0	0	0	0	0	0	0	0	0	0	0	0	0	0	0	0	0	0	0	0	0	0	0.00131856	0.00245171	0	0.00396863	0	0	0	0	0	0	0	0	0	0	0	0	0
Pusillimonas_unclassified	0.0611495	0.060611	0.108339	0.248053	0.208608	0.133788	0.135692	0.105174	0.19706	0	0.0799033	0.095768	0.0579682	0	0.0709542	0.075127	0.0363826	0.190396	0.0661342	0.0450472	0	0.0396069	0.0433526	0.0418585	0.144117	0.0950383	0.0243288	0	0.0293276	0	0.126792	0.127256	0.115336	0.115218	0.0719729	0.118821	0	0	0	0	0.0770152	0.0842303	0.0679879	0.125808	0.0683705	0.140947	0.0613252	0
Taylorella_equigenitalis	0	0	0	0	0	0	0	0	0	0	0	0	0	0	0	0	0.00369099	0	0	0	0	0	0	0	0	0	0	0	0	0	0.00492986	0.000284689	0	0	0.00344686	0	0	0	0	0	0	0	0	0	0	0	0.0079047	0
Taylorella_unclassified	0	0.0029108	0.00757943	0	0	0.00268834	0	0.0125023	0	0	0	0.0108912	0	0	0.00318757	0.0238745	0.00954661	0	0.00767997	0.00408029	0.00989086	0.0095427	0.0164813	0.0132663	0.00828885	0	0	0	0.0055941	0	0.00365019	0.00424036	0	0	0.00360497	0.00759067	0.00143161	0.00116962	0	0	0.0136927	0	0	0	0	0	0.0116871	0.00209942
Burkholderia_ambifaria	0	0.00717261	0	0	0	0	0	0	0	0	0	0	0	0	0	0	0	0	0	0	0	0	0	0	0.00689402	0	0	0	0.00208083	0	0.00849614	0.0032964	0	0	0.00501217	0	0	0	0	0	0	0	0	0	0	0	0.0079047	0.00334821
Burkholderia_cenocepacia	0	0.0252761	0.0129648	0	0.0126027	0.0103169	0.0170484	0	0	0	0	0	0	0.0153415	0	0	0.0134041	0.0238273	0.0102949	0.0243907	0.0231334	0.0191421	0.0229865	0	0.00715054	0.00602579	0.00741464	0	0.0169331	0.0142029	0.0121673	0.0139198	0	0	0.0137084	0.0186524	0.0172579	0.0174981	0	0.028158	0	0.0130853	0	0.00756772	0	0	0.0488307	0.0309302
Burkholderia_gladioli	0	0.0186193	0.0126656	0	0	0	0	0	0	0.00313533	0	0	0	0	0	0	0	0.00790827	0.0131774	0	0	0.0053288	0	0	0.00163532	0.00868378	0.00495355	0	0.0352082	0	0.0141602	0.0124514	0.00609426	0	0.0164912	0.0192309	0	0	0	0.0270461	0	0	0	0	0	0	0.0156182	0.00624395
Burkholderia_glumae	0	0	0	0	0	0	0	0	0	0	0	0	0	0	0	0	0	0	0	0	0	0	0	0	0	0	0	0	0	0	0.0033565	0.00575371	0	0	0	0	0	0	0	0	0	0	0	0	0	0	0	0
Burkholderia_mallei	0	0	0.00822767	0.0176717	0	0.0291178	0	0.0396206	0	0.0125092	0.021328	0.0240351	0	0	0	0	0	0.0889552	0.0269108	0.0542825	0	0.0428004	0.0687526	0	0.0347907	0.0690776	0	0.0316907	0.0320266	0	0	0	0.0233613	0	0.00798469	0.00638107	0	0	0.00905203	0.0661666	0.0975794	0.0608416	0	0	0	0.00886902	0	0.11583
Burkholderia_multivorans	0	0.011373	0	0	0	0	0	0	0	0	0	0	0	0	0	0	0	0	0	0	0	0	0	0	0	0	0	0	0	0	0.0042166	0.00815109	0	0	0.00246656	0	0	0	0	0	0	0	0	0	0	0	0.0158307	0
Burkholderia_pseudomallei	0	0.0177719	0.014976	0	0.0145097	0.0122895	0.0129992	0	0	0	0	0.00231144	0	0	0	0	0.0332189	0.0282682	0.0183043	0	0.0297195	0.0148526	0.00995316	0.0137314	0.0176679	0.00486292	0.00570598	0	0.0141587	0	0.0228032	0.0115224	0.0180376	0.00110312	0.0144989	0.0257346	0.0132306	0.00964936	0	0.0258872	0	0.0155753	0.0194094	0	0.0110623	0.00506801	0.0446658	0.0215733
Burkholderia_thailandensis	0.00319349	0.054249	0.0387116	0.0266853	0.0344916	0.0296764	0.0342879	0.00806848	0.00347069	0.0139241	0	0.014613	0	0.053777	0.00364732	0	0.0671316	0.0550163	0.055057	0.0680352	0.0165707	0.0284769	0.0589834	0.00653347	0.0233114	0.0506529	0.0333424	0.0321651	0.0380881	0.0199615	0.0294113	0.0431978	0.0247098	0.0244573	0.0317016	0.0414769	0.0413278	0.0521866	0	0.094904	0.0156237	0.0466744	0.0241948	0.0172572	0.0239313	0.0343269	0.0657875	0.0799769
Burkholderia_unclassified	0.319684	0.132227	0.198412	0.797528	0.489068	0.0699665	0.652078	0	0	0.213138	0.189586	0.0854253	0.153022	0.358065	0	0.396679	0.0782878	0.0975979	0	0.210099	0.0740877	0	0.297009	0.200744	0.352396	0.111575	0.269749	0	0	0	0.206634	0	0.0495771	0.156918	0	0.453143	0.263573	0.127396	0.083605	0.970104	0.0901311	0.530934	0.13585	0.085876	0	0	0.125158	0
Cupriavidus_basilensis	0	0.00800778	0.00952415	0	0	0.018347	0	0	0	0	0	0.0167481	0	0	0	0	0	0	0.00201779	0	0	0.00920257	0.0197224	0.00250265	0.00288587	0	0.0110201	0	0.0103589	0	0.0106149	0.017351	0.00541128	0	0.020523	0.0147957	0	0.00912611	0	0	0	0.0147339	0	0	0.0137407	0	0.0222479	0.00266047
Cupriavidus_necator	0	0.00609181	0.00600038	0	0	0.0057258	0	0	0	0	0	0	0	0	0	0	0	0.00286952	0.00253254	0	0	0	0.00331006	0	0.00904238	0.00241636	0	0	0.010766	0	0.0100485	0.0156129	0	0	0.0206495	0.00724006	0.016786	0	0	0	0	0.00637094	0	0	0	0	0.0269865	0
Cupriavidus_taiwanensis	0	0.0384791	0.0173529	0	0.003416	0.0157285	0.0043794	0	0	0.0257419	0	0.0120861	0	0	0	0	0.00949111	0.0216922	0.0272196	0.0205472	0.027821	0.0124339	0.0168721	0.0184487	0.0282815	0.0299024	0.00158325	0	0.0211701	0	0.020097	0.0286786	0.0131167	0.00744604	0.0199064	0.0303101	0.00207662	0.013543	0.00668218	0.0288001	0.0100062	0.0243675	0.00859491	0.0138907	0.0242641	0.0153808	0.0294514	0.0271295
Cupriavidus_unclassified	0	0	0	0	0	0	0	0.0547007	0	0	0	0.0707927	0.0618027	0	0	0.0804634	0.205363	0	0.0390793	0	0	0.0632086	0.167618	0.066132	0	0.000740009	0.0129168	0.127996	0	0	0	0	0	0.040496	0.0115738	0	0	0.00515556	0.0309116	0	0.0734541	0	0.0638007	0	0	0	0	0.236926
Polynucleobacter_necessarius	0	0.00185456	0	0	0	0.00329932	0	0	0	0	0	0	0	0	0	0	0	0.00228879	0.0117567	0	0	0	0	0	0.00282174	0	0	0	0.000874549	0	0.00522355	0.00908007	0	0	0.00222939	0.00280487	0	0	0	0	0	0	0	0	0	0	0.0100084	0
Ralstonia_solanacearum	0	0.0353718	0	0.0178263	0.0200482	0.0221177	0.0043794	0	0.00847975	0	0	0	0	0.0257084	0	0	0.0200368	0.0168243	0.0267461	0.0337353	0	0	0.00850501	0	0.0258606	0.0140451	0.0226985	0	0.0276086	0	0.021062	0.0273751	0.0241494	0.00593651	0.0173924	0.0217728	0.00807049	0.0199913	0.00222739	0.0361293	0	0.0313052	0	0.0161539	0.0237094	0.0136276	0.0348487	0.0355634
Ralstonia_unclassified	0.0409634	0.0613602	0.0629292	0	0.0483712	0	0.0406311	0.0529735	0	0.0311764	0	0.0326148	0.0397169	0	0	0.0737117	0.00405176	0.00877937	0	0	0.0558529	0.0134732	0.137965	0.0686346	0.0758502	0.0501998	0.0434689	0	0.0212606	0	0	0.0344473	0	0	0.0383423	0.0814287	0.00256431	0.033011	0	0	0	0.011162	0.0453358	0	0	0	0.0174668	0
Rubrivivax_unclassified	0.0483164	0.0462289	0.0642922	0.0331015	0.105299	0.0385968	0.0929405	0.049674	0.0100556	0.0432354	0	0.0173946	0.0128944	0.0118375	0.0105435	0	0.0602214	0.0797659	0.0933745	0.122026	0.0638218	0.055291	0.0942447	0.0423457	0.0297725	0.0533411	0.0342829	0.0626223	0.075362	0.0335198	0.0409283	0.0666171	0.0467752	0.0320775	0.0424849	0.0820072	0.0661685	0.052125	0.0404427	0.112883	0.0394982	0.0670408	0.0299877	0.0392673	0.0562305	0.093552	0.0943677	0.102111
Thiomonas_unclassified	0	0	0.0560978	0	0	0.15835	0.421569	0.108937	0	0.0952175	0	0.29751	0	1.00548	0.146966	0	0.225983	0.0788606	0.136984	0.186619	0	0.410128	0	0.173414	0	0.459289	0.0503976	0.254877	0.30377	0	0.105058	0.203657	0.0477734	0.238636	0.163963	0	0.065791	0.0540641	0.36348	0.317036	0	0	0.281617	0.0868662	0.141607	0.583867	0.0211642	0.288199
Acidovorax_avenae	0	0.0218494	0.00480363	0	0	0.00872836	0	0	0	0	0	0	0	0.00481124	0	0	0.0124883	0.0133911	0.0112832	0.00267769	0	0.0135487	0.00740166	0.00489456	0.0137239	0	0	0	0.0129373	0	0.0123981	0.0173211	0.0041504	0	0.0157164	0.00972938	0.0019193	0.0131736	0	0.034344	0.00917863	0.014648	0	0	0.00779747	0.00424299	0.0318526	0
Acidovorax_citrulli	0	0.00735684	0.00299188	0	0	0.00436418	0	0	0.00371458	0	0	0	0	0	0	0	0	0.00650767	0	0	0	0	0.0025515	0	0	0	0.00139514	0	0.00802173	0	0.00673397	0.0185947	0.00133093	0	0.0129811	0	0.00364981	0.00293944	0	0	0	0	0	0	0	0	0.0184231	0.00262427
Alicycliphilus_denitrificans	0	0.0177719	0.00530228	0	0	0.00617968	0	0	0	0	0	0	0	0	0	0	0	0	0.00840061	0.00302379	0	0.00515873	0.00845904	0	0.0155997	0.00212941	0	0	0.0133444	0	0.0177894	0.00984423	0.00754777	0	0.0177086	0.0214923	0.00423189	0.00518634	0	0.0363955	0	0.00286778	0	0	0.00667223	0.00695378	0.0287077	0
Alicycliphilus_unclassified	0	0	0.0957069	0.10603	0	0.350234	0.0843381	0	0.0874802	0.0612113	0.099326	0.119059	0.144131	0	0	0.0934099	0.0452077	0.189354	0.0327171	0.108984	0	0	0	0	0.0739744	0.0926522	0.0907471	0	0.00490049	0.190719	0.0452498	0.133983	0.0498048	0.143231	0.0359706	0.0101501	0.114245	0	0.0436284	0	0	0	0.0845166	0	0	0	0	0
Comamonas_testosteroni	0	0	0	0	0	0	0	0	0	0	0	0	0	0	0	0	0	0	0	0	0	0	0	0	0	0	0	0	0	0	0.00226564	0.00355112	0	0	0.00493312	0	0	0	0	0	0	0	0	0	0	0	0.00641726	0
Comamonas_unclassified	0	0.00771301	0.0413544	0.081169	0	0.0291876	0.0518055	0	0.0501656	0.0350996	0.0610031	0.0731238	0.0442656	0.0617836	0	0	0.0833109	0	0.100993	0.137601	0	0.0302343	0.0331006	0	0.0550239	0.0725662	0.0185758	0.0939571	0.212787	0.0585736	0.0509978	0.0229549	0	0	0.00605572	0.0544494	0	0.0398594	0.0535999	0	0.0588084	0.160802	0.0519158	0.0320249	0.052205	0.0269017	0.0248191	0.0708372
Delftia_acidovorans	0	0.00332839	0	0	0	0	0	0	0	0	0	0	0	0	0	0	0	0	0	0	0	0	0	0	0	0	0	0	0.00658928	0	0.00499279	0.00555892	0	0	0.0070202	0.00157774	0	0	0	0	0	0	0	0	0	0	0.0144282	0
Delftia_unclassified	0	0.000564966	0	0	0	0.00368337	0	0	0	0	0	0	0	0	0	0	0.00477331	0	0	0	0	0	0	0	0.00471358	0	0	0	0.00208083	0	0.0033565	0.00489964	0	0	0.0070202	0.00150761	0	0.00332418	0	0	0	0	0	0	0	0	0	0
Limnohabitans_unclassified	0.00723464	0.00534261	0.00651565	0	0	0.00232174	0	0	0	0	0	0	0	0	0	0	0	0.00954799	0	0	0	0	0.0209637	0	0	0	0	0	0.0126659	0	0.00881081	0.0593651	0	0	0.0184676	0.00301523	0	0.00995716	0	0	0	0	0	0.00496499	0	0	0.0124308	0
Polaromonas_unclassified	0.0241089	0.016556	0	0.0139147	0.0408095	0.03027	0	0	0	0	0	0	0.021334	0	0	0	0	0	0.0129098	0.0344092	0	0	0.0488004	0	0.055104	0.0846178	0.0195007	0	0.0182298	0	0.0456903	0.0928385	0.0262333	0	0.061158	0.0693854	0	0	0	0	0	0.0166228	0	0.0785204	0.0636952	0.040441	0.027454	0
Variovorax_paradoxus	0	0.0188649	0.012034	0	0.0116575	0.0112421	0	0	0	0	0	0	0	0	0	0	0	0.030352	0.01676	0	0	0	0.0231244	0	0.0160326	0.00483271	0.0270877	0	0.0172648	0	0.0159434	0.026536	0.00521865	0	0.0210606	0.0106585	0.016377	0.00966475	0	0.0149873	0	0.00317688	0	0	0	0.00518587	0.0288989	0.0240166
Variovorax_unclassified	0	0.0346349	0.0208933	0.0210266	0.0878044	0.0263771	0.0104098	0.0388215	0	0.0606807	0.0484183	0.0143388	0	0.0599681	0.0320903	0.0113688	0.0217296	0.0146721	0.0281668	0.0606943	0.0158207	0.0371504	0.04595	0.0427665	0.0339891	0.0451255	0	0	0.0186822	0	0.0131952	0.016467	0	0.013818	0.00880688	0.0247003	0.0122866	0.0307333	0	0.0999155	0.090081	0.0283343	0	0.0188274	0.0201435	0.0319403	0.0438159	0.0247043
Verminephrobacter_unclassified	0	0.0644184	0.0700266	0	0.0451707	0.049193	0.116419	0.0906608	0	0	0.0691932	0.123799	0.199844	0	0.0611463	0	0	0.130683	0	0	0.0468527	0.034127	0.148746	0.0383149	0.0620942	0.0273501	0.125814	0	0.213918	0.198325	0.103359	0.133983	0.158328	0.138398	0.0872624	0.144082	0	0	0	0.0883892	0	0.109439	0	0.0383196	0.0586554	0.0303639	0.137759	0.0424589
Candidatus_Zinderia_insecticola	4.58422	0.817788	2.82989	2.65205	3.16373	3.61225	3.46919	6.72895	6.19134	3.20989	3.41405	3.64614	2.26431	3.05828	9.77353	7.09092	6.42781	3.08428	2.26769	2.9814	5.87147	3.45246	3.50875	5.6072	1.4101	1.68715	2.01844	7.08277	1.0606	5.25117	1.23234	0.830017	3.18222	1.39241	2.00462	3.57222	2.53394	1.65198	1.17097	3.71141	5.77725	3.08032	2.44695	1.9597	1.84445	2.23667	1.53953	2.91815
Herbaspirillum_seropedicae	0	0.00253006	0	0	0	0	0	0	0	0	0	0	0	0	0	0	0	0	0	0	0	0	0	0	0	0	0	0	0	0	0.00281107	0	0	0	0	0	0	0	0	0	0	0	0	0	0	0	0.00131745	0
Herbaspirillum_unclassified	0	0.0204493	0.0140286	0	0	0.0255916	0.0529177	0	0	0.0358875	0	0	0	0	0	0	0.0356333	0.0100433	0.0745349	0.0601114	0	0.0424981	0.0693273	0.0108965	0.01281	0.0502904	0.0124779	0	0.0624398	0	0.0368795	0.0317503	0.030086	0.0121343	0.0474496	0.0928936	0.00789743	0.0399979	0.0265863	0.0266076	0	0.0336234	0	0.0327322	0.103348	0.0543485	0.0192305	0.069335
Janthinobacterium_unclassified	0	0.0457868	0.0127986	0	0	0.00946154	0	0.0781843	0	0	0	0	0	0.0670306	0	0	0.0620807	0	0.0274255	0.163776	0	0	0	0.0206413	0.0328348	0.0430262	0.0659167	0	0.0316195	0	0.0323902	0.0242285	0.0114355	0	0.02212	0	0.0150083	0	0.0158249	0	0	0	0	0	0	0	0.00563104	0.0842119
Massilia_unclassified	0.0725632	0.0816498	0.065572	0.0231293	0.138265	0.0596322	0.105175	0.0756065	0.0653428	0.073624	0.0435166	0.0928102	0.0506564	0.137184	0.0263281	0.0211367	0.0665765	0.0927812	0.0778704	0.114886	0.0657203	0.0640778	0.07666	0.0572509	0.0980233	0.0768703	0.0638004	0	0.0855852	0.0499788	0.0596618	0.0645494	0.0384744	0.0498	0.0759257	0.139244	0.107638	0.0851206	0.0198393	0.110095	0.0557489	0.100905	0.0550798	0.046835	0.0943779	0.0443746	0.0991275	0.0956863
Oxalobacter_formigenes	0.0590008	0.0394616	0.0891248	0.0191404	0.0797784	0.0639789	0.0277014	0.0679763	0.0363391	0.0445056	0.0431785	0.0877368	0.0547916	0.0539767	0.0949836	0.159419	0.108509	0.106582	0.0420442	0.0426427	0.0628375	0.0939153	0.183685	0.085223	0.0646114	0.0130785	0.0404435	0.0339441	0.0618065	0.010765	0.0676754	0.0620022	0.0559516	0.0538205	0.072716	0.0778175	0.0972863	0.035658	0.014245	0.0717418	0.0107586	0.0743219	0.0379372	0.0667516	0.0881653	0.0511221	0.124733	0.0762305
Sutterella_wadsworthensis	0	0.011545	0.0147433	0	0.00658325	0.0130402	0.00872403	0.0223236	0	0.00580438	0	0.00609202	0.0121613	0	0	0	0.0298887	0.0191985	0.030514	0.00761412	0.0114847	0.00833333	0.00558572	0.0106972	0.0219005	0.022744	0.00918601	0	0.00873042	0	0.0137826	0.0179204	0.027249	0.00386091	0.0193214	0.0208962	0.0106505	0.00883371	0.0015022	0.00859774	0	0	0	0.0173138	0.011506	0	0.0353374	0.0135738
Thiobacillus_denitrificans	0.206788	0.113362	0.121321	0.135498	0.306511	0.154108	0.028831	0.0888048	0.0573884	0.0879339	0.13579	0.122075	0.17242	0.154777	0.241214	0	0.0184549	0.141221	0.134472	0.115869	0.168285	0.0709561	0.194029	0.162251	0.0459494	0.0151475	0	0	0.350981	0.0366784	0.149217	0.592257	0.0106474	0.0440812	0.160184	0.0965224	0.107905	0.130474	0	0.167178	0	0.160184	0.150568	0.165443	0.238932	0.230904	0.0499144	0.041554
Methylotenera_mobilis	0	0	0	0	0	0	0	0	0	0	0	0	0	0	0	0	0	0	0	0	0	0	0	0	0	0	0	0	0	0	0.000755212	0.00203777	0	0	0.000442716	0	0	0	0	0	0	0	0	0	0	0	0	0
Methylotenera_unclassified	0	0.0177719	0.0379803	0	0.0298651	0	0.0787422	0	0	0	0	0	0	0	0	0.047053	0	0	0	0	0	0	0	0	0.0445866	0	0	0	0.00859471	0.0364205	0.00858005	0.000749181	0	0	0.0207128	0.013849	0	0	0	0.0307107	0.0357365	0	0.0389289	0	0	0	0.0562891	0
Methylotenera_versatilis	0	0	0	0	0	0	0.0371554	0	0	0	0	0	0	0	0	0	0	0	0	0	0	0	0	0	0	0	0	0	0	0	0	0	0	0	0.00407931	0	0	0	0	0	0	0	0	0	0	0	0	0
Methylovorus_unclassified	0	0	0	0	0	0	0	0	0	0	0	0	0	0	0	0	0	0	0	0	0	0	0	0	0	0	0	0	0	0	0	0	0	0	0	0	0	0	0	0	0	0	0	0	0	0	0.00193368	0
Chromobacterium_unclassified	0.174479	0	0.0772736	0	0	0	0	0	0	0	0	0	0	0	0	0	0	0	0	0	0	0	0	0.238881	0.0685233	0	0	0	0	0	0	0	0	0	0	0	0	0	0	0	0	0	0	0	0	0	0	0
Eikenella_corrodens	0	0	0	0	0	0	0	0	0	0	0	0	0	0	0	0	0	0	0	0	0	0	0	0	0	0	0	0	0	0	0.00314672	0.000419541	0	0	0	0	0	0	0	0	0	0	0	0	0	0	0.0108583	0
Kingella_unclassified	0.111693	0.0110168	0.074182	0.016172	0.176736	0.104705	0.123909	0.0232259	0.0870487	0.0804574	0.105872	0.0634471	0.0793962	0.184298	0.119932	0.0644078	0.140313	0.0695347	0.0322435	0.0796021	0.0757284	0.126568	0.0593742	0.267474	0.0877304	0.0693041	0.0967352	0.108711	0.0898524	0.0350239	0.0657664	0.0342825	0.0526593	0.111966	0.0481769	0.297894	0.210462	0.129828	0.0465163	0.0746077	0.0351597	0.213589	0.0931115	0.0370465	0.171671	0.0467023	0.0220992	0.218683
Neisseria_gonorrhoeae	0	0.0124907	0.00626633	0	0	0	0	0	0	0	0	0	0	0	0	0	0.0175946	0	0.0160188	0	0	0	0	0	0.00920271	0	0	0	0	0	0.0139504	0.00738692	0.0208746	0	0.01374	0.00203353	0.0142531	0	0	0	0	0	0	0	0	0	0.0302589	0.0143882
Neisseria_lactamica	0	0.00448288	0.0101059	0	0	0	0	0	0	0	0	0	0	0	0	0	0.0169286	0	0	0	0	0	0.015332	0	0.0141408	0	0	0	0	0	0.00461518	0.0043003	0	0	0.00871201	0	0.00808622	0.012558	0	0	0	0	0	0	0	0	0.0108796	0
Neisseria_meningitidis	0	0.00195282	0	0	0	0.00708743	0	0	0	0	0	0	0	0	0	0	0.00341347	0.0104191	0	0	0	0	0	0	0.0129704	0	0	0	0.00701147	0	0.0134889	0.00943968	0.00224157	0	0.00744711	0	0	0	0	0	0	0	0	0	0.0124094	0	0.0128345	0
Neisseria_unclassified	0.0610115	0.00116678	0.0241844	0.0180891	0.211792	0.0886103	0	0	0.0657743	0.163343	0	0.0240155	0	0	0.0803637	0.0366122	0.0917196	0.0272946	0.0165542	0.136489	0.0929554	0.0448601	0.0916702	0.245393	0.0222051	0	0.0237488	0	0.000572981	0.0393642	0.0562423	0.0189093	0	0	0	0.0518024	0.0567608	0.0787954	0	0.0298337	0.0874729	0.208661	0	0.0716458	0.00491304	0.103644	0	0
Pseudogulbenkiania_unclassified	0	0.00736912	0	0	0	0	0	0	0	0	0	0	0	0	0	0	0	0	0.00492095	0	0	0	0	0	0	0	0.00363678	0	0.0104644	0	0.010531	0.00936476	0	0	0.0166967	0.00180563	0.00234406	0	0	0.0110252	0	0	0	0	0	0	0.0239691	0.0101351
Nitrosomonas_unclassified	0	0	0	0	0	0	0	0	0	0	0	0	0	0	0	0	0	0	0	0	0	0	0	0	0	0	0	0	0	0	0	0	0	0	0.00271954	0	0	0	0	0	0	0	0	0	0	0	0.0027199	0
Nitrosospira_unclassified	0.0317378	0.0166542	0.0540367	0	0	0.0405345	0	0	0	0.0243269	0	0.0392945	0	0.0601678	0.0737127	0	0.0358276	0.0402929	0.0595455	0.0349921	0.0284538	0	0	0.021638	0.0190307	0.0696817	0.0123212	0	0.0289808	0.0394717	0.0332503	0.0175758	0.0190533	0.0121198	0.0272586	0.0491027	0.0249351	0.0205607	0	0.0134056	0	0.043549	0.035639	0.0362685	0.00979438	0.00957619	0.0434121	0.0120897
Azoarcus_unclassified	0	0.0112256	0.00546849	0.028386	0.0602774	0	0	0	0	0.00940599	0	0	0	0	0	0	0.0361883	0.0456561	0.0354761	0.0182702	0	0	0.00986121	0.00852673	0.0237763	0.0594424	0.0055022	0	0.0355097	0	0.0187754	0.0191491	0.0102447	0.00969582	0.00608734	0.032887	0.0198694	0	0	0.0412974	0.0874478	0	0	0.00848717	0	0.0208908	0.0239904	0.0742035
Methyloversatilis_unclassified	0.0248186	0.0299555	0.043349	0.147975	0.0896284	0.0733357	0.196187	0.110149	0.160065	0.112341	0.032453	0.0890688	0.0925725	0.38125	0.0582958	0.0311134	0.0130156	0.0506266	0.0543569	0.126799	0.182231	0.0963341	0.147504	0.0843593	0.0320652	0.0997955	0.13605	0.10207	0.127096	0	0.0238311	0.0910105	0.0653557	0.0313227	0.0601777	0.091947	0.0260049	0.133013	0.044004	0.260751	0.0643758	0.162364	0.0838712	0.0177665	0.188946	0.052227	0.0448571	0.156045
Methyloversatilis_universalis	0	0.0250919	0.00197796	0	0.00374765	0.0122197	0	0	0	0	0	0.0105778	0	0	0	0	0.00260867	0.0134936	0	0	0	0	0	0	0.0185818	0.00231064	0	0	0.0145055	0	0.0149574	0.0266708	0.0166016	0.00686546	0.0247604	0.0186173	0	0	0	0.00754847	0	0.00898113	0	0	0.00492889	0.00509748	0.0342537	0
Thauera_unclassified	0.028288	0.0807164	0.0777889	0.0926719	0.111517	0.049193	0.0639531	0	0.0622849	0.0864225	0	0.0230165	0.202494	0.0744018	0	0	0.204864	0.019728	0.104905	0.0223687	0	0.0224679	0.152975	0.0421464	0.0797141	0.0660722	0.0740524	0.0635237	0.0426117	0	0.0298938	0.0609833	0.123426	0	0.0386586	0.147553	0.0728861	0.0929694	0	0.122122	0.0363885	0.0966287	0	0	0.0351362	0.0655453	0.0364211	0.172442
Bacteriovorax_unclassified	0.0873874	0	0	0.0759433	0.0796458	0.0472379	0.0484688	0.0472251	0	0.0350996	0	0.0691669	0.0418597	0	0	0.125382	0.123995	0.0317697	0.0551805	0.128748	0	0	0.142838	0.244507	0.109342	0	0.0186542	0	0	0.273981	0.043131	0.0168566	0.0760206	0.0339064	0.217199	0	0.0453866	0	0	0.0851474	0.173968	0.0694106	0.0905299	0.0299597	0	0	0.192837	0.0670003
Bdellovibrio_bacteriovorus	0	0	0	0	0	0	0	0	0	0	0	0	0	0	0	0	0	0	0	0	0	0	0	0	0	0	0	0	0	0	0.00178314	0	0	0	0	0	0	0	0	0	0	0	0	0	0	0	0.00297489	0
Desulfobacter_unclassified	0	0.000503557	0	0	0	0	0	0	0	0	0	0	0	0	0	0	0	0	0	0	0	0	0	0	0.00117038	0	0	0	0.00283475	0	0.00274813	0.00385079	0	0	0.00305157	0	0	0	0	0	0	0	0	0	0	0	0.00881842	0
Desulfobulbus_sp_oral_taxon_041	0.00413971	0.0174157	0.0184832	0.00718926	0.0417216	0.0235666	0.0580096	0.0355219	0.026396	0.0301956	0.0272901	0.0251908	0.00398485	0.0326075	0.00974662	0.019791	0.00957436	0.0259965	0.0370821	0.0385806	0.0264381	0.0218821	0.0416056	0.030054	0.0300772	0.0463034	0.0224477	0.00832592	0.0201297	0.0205846	0.022048	0.0229849	0.0109101	0.0139486	0.0355279	0.0364107	0.0307402	0.0200528	0.0165242	0.0340621	0	0.0489411	0.0136165	0.0167904	0.0295258	0.0237784	0.0214404	0.01618
Bilophila_unclassified	0	0.00809375	0.00766254	0	0	0.00642407	0.00399707	0	0	0	0	0.0054456	0	0	0	0	0.00635516	0	0.0074329	0	0	0	0.00243657	0	0.0107098	0.0087895	0	0	0.00597106	0	0.0092933	0.00693741	0.00395777	0	0.0150365	0.00275227	0.00899867	0.0529407	0	0	0	0	0	0	0.00396213	0	0.0220142	0.0156551
Desulfovibrio_africanus	0	0.000601811	0	0	0	0	0	0	0	0	0	0	0	0	0	0	0	0	0	0	0	0	0	0	0	0	0	0	0.0017491	0	0.00486692	0.00579866	0	0	0.00251399	0	0	0	0	0	0	0	0	0	0	0	0.00820219	0
Desulfovibrio_desulfuricans	0.0617409	0.175839	0.196301	0.109849	0.21219	0.190383	0.210958	0.0961515	0.129991	0.133758	0.232595	0.0619779	0.0622162	0.209443	0.044013	0.14682	0.0368266	0.123902	0.089133	0.170461	0.0871427	0.21011	0.360911	0.170225	0.196063	0.125922	0.0520593	0	0.0708084	0.223766	0.154735	0.0833688	0.105003	0.0693658	0.0955633	0.102746	0.15249	0.1862	0.0450659	0.265465	0	0.16118	0.157983	0.15738	0.112255	0.122133	0.223988	0.203625
Desulfovibrio_magneticus	0	0.0136452	0	0	0	0	0	0	0	0	0	0	0	0	0	0	0.00527284	0	0.00708287	0.00327881	0	0	0	0	0.00840108	0.00453067	0	0	0.0101026	0	0.0117477	0.0171413	0	0	0.0120008	0.0100274	0.00888855	0.00907994	0	0	0	0.0059588	0	0	0	0	0.0141945	0.00662402
Desulfovibrio_vulgaris	0	0.00363543	0	0	0	0	0	0	0	0	0	0	0	0	0	0	0	0	0	0	0	0	0	0	0	0	0	0	0	0	0.0042166	0.00181302	0	0	0	0	0	0	0	0	0	0	0	0	0	0	0.00369736	0
Lawsonia_intracellularis	0	0	0.00779551	0	0	0.000925206	0	0	0	0	0	0.00681679	0	0	0	0.0492572	0.0085198	0	0.00630046	0	0	0.0129441	0.0061374	0	0.00997227	0	0	0	0.000693608	0	0.00388095	0.0060384	0.00763533	0	0.0132973	0.00333078	0.00297334	0	0	0.00488615	0	0	0	0	0.0032648	0	0.0203142	0
Hippea_unclassified	0.198253	0.0418812	0.137543	0.0640849	0.123191	0.165315	0.203729	0.22218	0.194002	0.121345	0.134161	0.0849944	0.11276	0.186495	0.116438	0.174964	0.153967	0.0914489	0.108714	0.139459	0.0958851	0.228855	0.119185	0.143293	0.0591763	0.0637163	0.0693967	0.0196169	0.0649579	0.132231	0.0809545	0.0534166	0.0637095	0.0992516	0.0464535	0.178249	0.0867617	0.12872	0.047889	0.0546716	0.0491282	0.166056	0.0799043	0.0353632	0.0832047	0.129647	0.0872492	0.116445
Geobacter_metallireducens	0	0.00607952	0	0	0	0.00502754	0	0	0	0	0	0	0	0	0	0	0	0	0	0	0	0	0	0	0.00248505	0	0	0	0.00309108	0	0.00616756	0.00293679	0	0	0.00558138	0	0.00954929	0.00407828	0	0	0	0	0	0	0	0	0.0134507	0
Geobacter_sulfurreducens	0	0.00497416	0	0	0	0.0041547	0	0	0	0	0	0	0	0	0	0	0	0	0	0	0	0	0	0	0	0	0	0	0.00404102	0	0.00696473	0.00925987	0	0	0.0091231	0.00664402	0	0	0	0	0	0	0	0	0	0	0.0154694	0
Anaeromyxobacter_dehalogenans	0.156619	0.143735	0.0735005	0.0798394	0.179705	0.0820291	0.165566	0.0778234	0.081777	0.110798	0.0896607	0.105053	0	0.149711	0.0564875	0.0646399	0.185854	0.164092	0.170854	0.139531	0.187317	0.110299	0.248645	0.0906491	0.0745355	0.0947816	0.0785513	0.12617	0.10965	0.098561	0.0511656	0.10045	0.0989791	0.0601054	0.0973816	0.147851	0.141698	0.129766	0.0580547	0.214254	0.131786	0.178764	0.145767	0.0811232	0.134744	0.0849629	0.0992125	0.259966
Anaeromyxobacter_unclassified	0	0	0.00618322	0	0	0	0	0.00438224	0.0149146	0	0	0	0.0256947	0	0	0.00013921	0	0	0	0	0	0	0	0	0.00747119	0	0	0	0	0	0.0327049	0	0	0	0	0	0	0.0108036	0	0	0	0	0	0	0	0	0.047152	0
Myxococcus_unclassified	0	0.0158068	0.0184167	0	0.0067325	0.00731437	0	0	0	0	0	0	0	0	0	0	0.00935235	0.0145013	0.0249136	0.0251557	0	0.0100151	0.00282734	0	0.00894619	0	0	0	0.00906214	0	0.00920939	0.0223855	0	0	0.0133921	0.00897557	0.00611973	0.00831045	0	0	0	0.00269606	0	0	0	0	0.0317676	0.00886823
Myxococcus_xanthus	0	0	0	0	0	0	0	0	0	0	0	0	0	0	0	0	0	0	0	0	0	0	0	0	0	0	0	0	0	0	0.000398584	0	0	0	0.00286184	0	0	0	0	0	0	0	0	0	0	0	0.00174244	0
Sorangium_cellulosum	0.0129317	0.04026	0.0265945	0.0113018	0.0274772	0.0190802	0.021758	0.00556802	0	0.0287968	0	0.0300291	0.0031954	0.0298479	0	0	0.0417664	0.0261673	0.0210839	0.0472695	0.0198755	0.03065	0.0384105	0.0153924	0.0287304	0.033089	0.0340008	0	0.0333234	0	0.0275652	0.0353164	0.0212423	0.0129471	0.0313854	0.0637406	0.038968	0.0416446	0.0245143	0.0522442	0.0123886	0.043841	0.0320027	0.0304689	0.0265938	0.0254579	0.0446446	0.0394545
Arcobacter_butzleri	0.0113744	0.0284571	0.0628461	0.0356216	0.0507756	0.0706474	0.0298911	0.138659	0.00416483	0.109447	0.00989572	0.0743774	0.0282323	0	0.13115	0.229465	0.179193	0.0425133	0.100334	0.0779627	0.049009	0.107275	0.134149	0.0810814	0.125199	0.0249187	0.0196261	0.0381427	0.0336702	0.0654925	0.0321385	0.0333236	0.10693	0.0271715	0.108133	0.0825857	0.0455282	0.0113422	0.00657858	0.126821	0.101617	0.111122	0.0297201	0.0515454	0.043108	0.0509158	0.106416	0.0727375
Arcobacter_unclassified	0.110826	0	0.020511	0.00975575	0.0944374	0	0	0	0	0	0.038246	0.0212927	0.00345854	0.0689188	0.0366265	0	0	0.03756	0.0316464	0	0	0.0112812	0	0.0190024	0	0.000996747	0.033844	0.0349878	0	0.062914	0.00660811	0	0	0	0	0	0.0260521	0.0377818	0.0104765	0	0.154056	0	0.0400938	0.0040597	0.020714	0	0	0.0247586
Campylobacter_coli	0.00402144	0.0161138	0.0318303	0.00463823	0.0308269	0.0237062	0	0.0819221	0	0.00302278	0	0.066307	0.0116726	0	0.0137004	0.0749182	0.0624693	0.0175246	0.052195	0.0400561	0.0357665	0.0327664	0.047766	0.0379384	0.0473924	0	0.0192499	0	0.0153951	0.0349379	0.025866	0.0189093	0.0512058	0.0253427	0.0437814	0.0144451	0.0285377	0	0.0114089	0.0101325	0.0558241	0.0496624	0	0.0192093	0.0330759	0	0.046557	0.0213742
Campylobacter_curvus	0	0.000994831	0.00265945	0	0.00253712	0.00282799	0	0	0	0	0	0	0	0	0	0	0	0	0	0	0	0	0	0	0.00120244	0	0	0	0	0	0.00685984	0.0017381	0.00337986	0	0.00461689	0	0	0	0	0	0	0	0	0	0	0	0.00671475	0
Campylobacter_fetus	0	0.00176859	0.00312485	0	0.0237461	0	0	0.011832	0	0.0101617	0	0	0	0	0	0.00874703	0.0189267	0	0.00195603	0.0108565	0	0.011319	0.00252852	0.0163669	0.0300291	0	0	0	0.00497589	0	0.016321	0.0134103	0.00907134	0	0.0165544	0.0107111	0.00364981	0	0	0	0.0397741	0.014545	0	0	0	0	0.0137907	0.00275096
Campylobacter_jejuni	0.0301608	0.0261972	0.0685141	0.0243198	0.146042	0.0402901	0.0340967	0.17199	0.0488148	0.068929	0.0784282	0.059451	0.0766707	0.0151236	0.161923	0.191321	0.0541992	0.0622755	0.0870946	0.042078	0.0813301	0.117819	0.0992787	0.0602629	0.0686836	0.00593517	0.0291256	0.037858	0.0431545	0.0622694	0.0695424	0.0352714	0.10397	0.025183	0.100765	0.0691925	0.0469913	0.0211917	0.0195156	0.0674038	0.214168	0.0996854	0.0427069	0.0343164	0.0458498	0.0429897	0.0987026	0.0995232
Campylobacter_showae	0	0	0	0	0	0	0	0	0	0	0	0	0	0	0	0	0	0	0	0	0	0	0	0	0	0	0	0	0	0	0.00853809	0.0044801	0	0	0.0102773	0	0.00224967	0	0	0	0	0	0	0	0	0	0.00694849	0
Campylobacter_upsaliensis	0.0388344	0.00819201	0.0277912	0.00205628	0.0606588	0.0178059	0.0116784	0.082747	0	0.0489111	0	0.0138686	0.0362395	0	0.021087	0.0557768	0.0498977	0.0351516	0.0341172	0.0341724	0.0495012	0.0429516	0.0381576	0.0362331	0.0310712	0.0107679	0.0123995	0.0140663	0.0109319	0.039794	0.0386836	0.0154781	0.0590337	0.00529787	0.0660595	0.0180914	0.0233147	0	0	0.0232562	0.0477239	0.0317688	0	0.00490841	0.0332977	0.0177528	0.0595615	0.0315274
Campylobacter_ureolyticus	0.0728984	0.0328171	0.0975685	0.0374924	0.070741	0.0543951	0.0190817	0.112366	0.0112188	0.0612113	0.0447459	0.0432514	0.0162213	0.0452257	0.116101	0.125359	0.120915	0.0574417	0.101096	0.0685999	0.070197	0.0986016	0.120863	0.143758	0.0931654	0.00717356	0.0245326	0.0417719	0.0287244	0.0945644	0.0713046	0.0321099	0.0706443	0.0220478	0.0966543	0.0874241	0.0343114	0.00757175	0.0192436	0.173067	0.115059	0.0840586	0.0712622	0.0441616	0.0593527	0.0199332	0.0974914	0.0906188
Sulfurospirillum_unclassified	0	0	0	0	0	0	0	0	0	0	0	0	0	0	0	0	0	0	0	0	0	0	0	0	0.00118641	0	0	0	0	0	0.0046991	0.000599344	0	0	0.00681466	0	0	0	0	0	0	0	0	0	0	0	0.00450483	0
Helicobacter_bilis	0	0.0033898	0.00759605	0	0.00737921	0.00523702	0	0	0	0	0	0.00225267	0	0	0	0.00361946	0.00682694	0	0	0	0	0.00736961	0.0040916	0.0079509	0.00118641	0	0	0	0.00345296	0	0.00855907	0.00305666	0	0	0.00657749	0	0	0	0	0	0	0	0	0	0	0	0.0223117	0
Helicobacter_canadensis	0	0.0111519	0.0122501	0	0.0150735	0.00342152	0	0.0270926	0	0.024134	0	0	0	0	0	0.0298838	0.0224512	0	0.0166777	0.0157747	0	0.0244709	0.00995316	0.0239634	0.0353198	0	0.00572166	0	0	0	0.0150203	0.0108631	0.00803812	0.00934747	0.0246972	0.00988715	0.00931331	0	0	0	0.0267835	0.0175158	0	0.00492256	0	0	0.0276027	0.0160171
Helicobacter_cetorum	0	0.00127731	0	0.00388065	0	0	0	0	0	0.00520947	0	0	0	0	0	0	0.012183	0	0.0305346	0.00497286	0.0060939	0	0	0	0.0406907	0	0.00282164	0	0.00646865	0	0.0170552	0.00939472	0	0.00248202	0.0172185	0.0165662	0.0106033	0	0.0114089	0	0.0258557	0.0144419	0	0.00462551	0	0.00801453	0.0233316	0
Helicobacter_cinaedi	0	0	0.00681484	0	0	0	0	0.0222721	0	0	0	0	0	0	0	0	0.00224789	0	0	0	0	0	0	0	0.00594809	0	0.00152055	0	0	0	0.00390193	0.00824099	0	0.0084911	0.0155741	0	0	0	0	0	0	0	0	0	0	0	0.0254141	0
Helicobacter_macacae	0	0	0	0	0	0	0	0	0	0	0	0	0	0	0	0	0	0	0	0	0	0	0	0	0	0	0	0	0	0	0	0.26506	0	0	0.234955	0.42222	0	0	0	0	0	0	0	0	0	0	0.718776	0
Helicobacter_pylori	0	0	0	0	0	0	0	0	0	0	0	0	0	0	0	0	0	0	0	0	0	0	0	0	0	0	0	0	0.00177926	0	0.00564311	0.00407554	0	0	0.00509123	0	0	0	0	0	0	0	0	0	0	0	0.00662975	0
Helicobacter_suis	0	0	0	0	0	0	0	0	0	0	0	0	0	0	0	0	0	0	0	0	0	0	0	0	0	0	0	0	0	0	0.000985971	0.00148338	0	0	0.00037947	0	0	0	0	0	0	0	0	0	0	0	0.00163619	0
Sulfurimonas_gotlandica	0	0.0040653	0.0178183	0	0.00515716	0.00679067	0	0.0308561	0	0.0112711	0	0.00742403	0	0	0	0.0439672	0	0	0.0119215	0.00240446	0	0.0042328	0.0293768	0.00861532	0.0128902	0	0	0	0	0	0.0107828	0.00908007	0.0147978	0	0.0298201	0.0107812	0.00497129	0.00527868	0	0.0225671	0.0236237	0	0	0	0	0	0.0288139	0.00465129
Sulfurimonas_unclassified	0.0679701	0.0107589	0.0171202	0.00389611	0.0344916	0.0209306	0	0	0	0.0334435	0	0.0396667	0	0	0.0159992	0.10037	0.0292504	0.0212994	0.0549746	0.0120223	0.0468293	0.0180272	0.0211246	0.07065	0.0419092	0	0.0185915	0	0.0152141	0.0737865	0.00274813	0	0.0460221	0	0.0333618	0.0138315	0.0506254	0	0.0226624	0.0104927	0.0826578	0.0245393	0	0.0587878	0.0294782	0	0	0.0462596
Acidithiobacillus_caldus	0	0.00253006	0	0	0	0	0	0	0	0	0	0	0	0	0	0	0	0	0	0	0	0	0	0	0.00153913	0	0	0	0	0	0.00356628	0.00110879	0	0	0.00221358	0	0	0	0	0	0	0	0	0	0	0	0.00624727	0
Acidithiobacillus_ferrooxidans	0	0	0	0	0	0	0	0	0	0	0	0	0	0	0	0	0	0	0	0	0	0	0	0	0	0	0	0	0	0	0.000419562	0	0	0	0	0	0	0	0	0	0	0	0	0	0	0	0.0013387	0
Aeromonas_hydrophila	0	0.00628832	0	0	0	0	0	0	0	0	0	0	0	0	0	0	0	0	0	0	0	0	0	0	0	0	0	0	0	0	0.00497181	0.00590354	0	0	0.00507542	0	0	0	0	0	0	0	0	0	0	0	0.00318738	0
Aeromonas_unclassified	0	0.00288624	0.00191148	0	0	0	0	0	0	0	0	0	0	0	0	0	0.00266417	0	0	0	0	0	0	0	0.00660543	0	0.00525139	0	0.00523222	0	0.00539138	0.0046599	0	0	0.00373146	0	0.0177142	0.0129889	0	0	0	0	0	0	0.01214	0	0.0153632	0
Aeromonas_veronii	0	0.00143698	0	0	0	0	0	0	0	0	0	0	0	0	0	0	0	0	0	0	0	0	0	0	0	0	0	0	0	0	0.000902059	0.00161823	0	0	0	0	0	0	0	0	0	0	0	0	0	0	0	0
Oceanimonas_unclassified	0	0.00876925	0	0	0	0	0	0	0	0	0	0	0	0	0	0	0	0	0	0	0	0	0	0	0	0	0	0	0	0	0.0077619	0.00866053	0	0	0.0051861	0	0	0	0	0	0	0	0	0	0	0	0.0127495	0
Alteromonas_unclassified	0	0.00219845	0.0231372	0	0	0.0122721	0	0	0	0	0	0.0308518	0	0	0.030282	0	0	0.00824988	0	0	0	0.00859788	0.0098842	0	0	0	0	0	0	0	0.00702767	0	0	0	0	0	0.00685913	0	0	0	0	0	0	0	0	0	0.0418609	0
Marinobacter_unclassified	0.200402	0.0940054	0.0591561	0	0	0.125252	0.0741022	0.172325	0.143499	0.0502135	0.170363	0.053359	0.189938	0.175383	0	0.232736	0.348257	0.162213	0	0.0492003	0.0593921	0.165023	0.090314	0.228627	0.0798263	0.202234	0.079727	0	0.0368969	0.244823	0.080535	0.0652536	0.328109	0.161984	0.159061	0.252859	0.138771	0.119209	0.0785156	0.331788	0.160476	0.0460047	0.0742531	0.0469057	0.112017	0.0769778	0.0384398	0.192983
Microbulbifer_unclassified	0.0954105	0.0277816	0.0642922	0.0281541	0.0414397	0.0631933	0.111675	0.086923	0	0	0	0.0760816	0	0	0	0	0.085642	0.06026	0	0	0	0.0356576	0.0360888	0	0	0.111032	0.0388132	0	0.0259802	0.121896	0.0641301	0	0.0197888	0.0190433	0.00705183	0.0864775	0.100952	0.0216687	0	0	0	0.209691	0	0.0331848	0	0.0562048	0.101741	0.0383324
Teredinibacter_turnerae	0	0	0	0	0	0	0	0	0	0	0	0	0	0	0	0	0	0	0	0	0	0	0	0	0	0	0	0	0	0	0.000503475	0.000449508	0	0	0.000284603	0	0	0	0	0	0	0	0	0	0	0	0	0
Colwellia_unclassified	0	0	0	0	0	0	0	0	0	0	0	0	0	0	0	0	0	0	0	0	0	0	0	0	0	0	0	0	0	0	0	0.000314656	0	0	0.00113841	0	0	0	0	0	0	0	0	0	0	0	0	0
Idiomarina_unclassified	0	0.00942019	0	0	0.0167649	0.00315967	0	0	0	0	0	0.00767868	0	0	0	0	0	0.00590985	0.0105008	0	0	0	0	0	0.0335242	0.0102846	0.00766546	0	0.00242763	0	0.0106149	0.0147289	0	0	0.00246656	0	0	0	0	0	0	0	0	0	0	0	0.0247128	0.0144606
Moritella_marina	0	0	0	0	0	0	0	0	0	0	0	0	0	0	0	0	0	0	0	0	0	0	0	0	0	0	0	0	0	0	0	0.000329639	0	0	0	0	0	0	0	0	0	0	0	0	0	0	0	0
Psychromonas_unclassified	0	0	0	0	0	0	0	0	0	0	0	0	0	0	0	0	0	0	0	0	0	0	0	0	0.00883396	0	0	0	0	0	0.0033565	0.00558889	0	0	0.000932865	0	0	0	0	0	0	0	0	0	0	0	0.0052698	0
Shewanella_unclassified	0.0944249	0.00916227	0.0207936	0	0.0428492	0	0	0.0403166	0	0	0	0	0	0.0604583	0.0508173	0.238513	0	0.0604479	0	0.0650661	0	0	0.0996465	0	0.0551682	0.0897223	0	0.0881219	0	0.116546	0.0236004	0.0230598	0	0	0	0	0.0252026	0	0	0.0419864	0	0.0962681	0	0.223665	0.073442	0	0.0239054	0.178324
Nitrosococcus_unclassified	0	0	0	0	0	0	0	0	0	0	0	0	0	0	0	0	0	0	0	0	0	0	0	0	0	0	0	0	0	0	0.000524453	0.000239738	0	0	0	0	0	0	0	0	0	0	0	0	0	0	0.000424984	0
Rheinheimera_unclassified	0	0.00130188	0	0	0.00681541	0	0	0	0	0	0	0	0	0	0	0	0	0	0	0	0	0	0	0	0.00602826	0	0	0	0.00381484	0	0.000839125	0.00942469	0.00579655	0	0.00713088	0	0.00402738	0	0	0	0	0	0	0	0	0	0.0102846	0
Spiribacter_unclassified	0.121274	0.12019	0.161113	0.913469	0	0.682209	0	0.208569	0	0.0911497	0.158439	0.0949453	2.64383	0.160441	0.140713	0.297979	0	0.0755128	0.131157	0.0893475	0.646867	0.157067	0.257863	0	0.0476328	0.188461	1.10974	0.488051	0.55258	0.152107	0.0754373	0.275279	0.22871	0.456952	0.142713	0	0.125966	0	0.208805	0.505904	0	0.167035	0	0.0831601	0.0677841	0.20963	0.141881	0
Thioalkalivibrio_sp_ALD1	0	0	0	0	0	0	0	0	0	0	0	0	0	0	0	0	0	0	0	0	0	0	0	0	0	0	0	0	0	0	0	0	0	0	0.120245	0	0	0	0	0	0	0	0	0	0	0	0	0
Thioalkalivibrio_unclassified	0.215482	0.102013	0.0586741	0.016744	0.0719681	0.0757273	0.259288	0.0752972	0	0.130381	0.0701305	0.0455236	0	0.319049	0.128361	0.0313919	0.0795089	0.100177	0.0442885	0.169769	0.0495715	0.0571239	0.101462	0.0198883	0.241547	0.116363	0.118556	0	0.248025	0.0726262	0.122974	0.106653	0.0306464	0.0425426	0	0.127481	0.139747	0.0351194	0.0167314	0.256366	0.0340813	0.223223	0.120817	0.111125	0.0806373	0.0676521	0.107627	0
Buchnera_aphidicola	0.281481	0.028322	0.175208	0.0240415	0.203484	0.0306715	0.0596084	0.0941666	0	0.261728	0	0.0409203	0.202419	0.107808	0.189477	0.0901385	0.0524509	0.0874521	0.0447415	0.0791467	0.0426338	0.104875	0.252369	0.0342619	0.235727	0	0.0623739	0.164597	0.138918	0.36139	0.00990167	0.105065	0.152286	0.0156323	0.0677039	0.0980651	0.107827	0.0246236	0	0.167899	0.301967	0.236223	0.0611403	0.365344	0.210738	0.0479251	0	0.0627834
Candidatus_Blochmannia_unclassified	0.0119657	0.00536718	0.0250985	0	0.010248	0.0164442	0	0.0540304	0	0.00916481	0	0.00961794	0	0	0.0137311	0.0601619	0.0246158	0.00561948	0.0234723	0.0396007	0.0161957	0.0250945	0.0642933	0.0227232	0.036378	0	0.00365246	0	0.00788602	0	0.024922	0.0160774	0.0309091	0	0.0281441	0.011535	0.00319358	0.00264703	0	0.00996023	0.00752347	0.0145621	0	0.00213594	0	0	0.033935	0
Candidatus_Moranella_endobia	0	0	0	0	0	0	0	0	0	0	0	0	0	0	0	0	0.00349673	0	0	0	0	0	0	0	0.00123451	0	0	0	0	0	0.00683887	0.00394069	0	0	0.00733643	0	0	0	0	0	0	0	0	0	0	0	0.00223117	0
Citrobacter_unclassified	0	0	0	0	0	0	0	0	0	0	0	0	0	0	0	0	0	0	0	0	0	0	0	0	0	0	0	0	0	0	0	0.000794131	0	0	0	0	0	0	0	0	0	0	0	0	0	0	0.000679975	0
Cronobacter_malonaticus	0	0	0	0	0	0	0	0	0	0	0	0	0	0	0	0	0	0	0	0	0	0	0	0	0	0	0	0	0	0	0.00184607	0	0	0	0.00265629	0	0	0	0	0	0	0	0	0	0	0	0.0110496	0
Cronobacter_sakazakii	0	0	0	0	0	0	0	0	0	0	0	0	0	0	0	0	0	0	0	0	0	0	0	0	0	0	0	0	0	0	0.00186705	0	0	0	0.00338361	0	0	0	0	0	0	0	0	0	0	0	0	0
Cronobacter_turicensis	0	0.000700066	0	0	0	0.00356117	0	0	0	0	0	0	0	0	0	0	0.00871406	0	0	0	0	0	0	0.00263554	0.00440896	0	0	0	0	0	0.00654517	0.0132305	0.00140098	0.00396251	0.0136767	0	0.00390152	0.0105574	0	0	0	0.0153521	0	0.00254615	0	0	0.0243728	0
Cronobacter_unclassified	0	0.00321785	0	0	0	0	0	0	0	0	0	0	0	0	0	0	0	0	0	0	0	0	0	0	0	0	0	0	0.00625755	0	0	0	0	0	0	0	0.000818061	0	0	0.0113697	0	0	0	0	0	0	0	0
Dickeya_dadantii	0	0	0	0	0	0.00581309	0	0	0	0	0	0	0	0	0.0216694	0	0	0	0	0.013607	0	0	0	0	0	0	0	0	0	0	0.005748	0	0	0	0.00215033	0	0.00931331	0	0	0	0	0	0	0	0.020825	0	0.00337862	0
Dickeya_unclassified	0	0.000650939	0	0	0	0	0	0	0	0	0	0	0	0	0	0	0	0	0	0	0	0	0	0	0.0029019	0	0	0	0.00628771	0	0.00564311	0.00545404	0	0	0.000521772	0	0	0	0	0	0	0	0	0.00520546	0	0	0.00616227	0.00287765
Edwardsiella_tarda	0	0.00354946	0	0	0	0	0	0	0	0	0	0	0	0	0	0	0	0	0	0	0	0	0	0	0	0	0	0	0.00517191	0	0.00809755	0.00647292	0	0	0.00700439	0.00415471	0.00185637	0	0	0.00609203	0	0	0	0	0	0	0.0118783	0
Edwardsiella_unclassified	0	0.00140013	0.00506957	0	0	0.00605748	0	0	0	0	0	0	0	0	0	0	0.00457904	0	0.00420031	0	0	0	0	0	0.0101807	0	0	0	0	0	0.00281107	0.000119869	0	0	0	0.000298017	0	0.00795649	0	0	0	0	0	0	0	0	0	0
Enterobacter_cloacae	0	0.0123801	0.0081778	0	0	0	0	0.00773336	0	0	0	0	0	0	0	0	0	0	0	0	0.00993774	0.00621693	0	0	0	0	0	0	0.00815744	0	0.0166986	0.00885532	0	0	0.00845903	0	0	0	0	0.0275786	0	0	0	0	0	0	0.0243728	0
Erwinia_pyrifoliae	0	0	0	0	0	0	0	0	0	0	0	0	0	0	0	0	0	0	0	0	0	0	0	0	0	0	0	0	0	0	0.0006713	0	0	0	0	0	0	0	0	0	0	0	0	0	0	0	0.00172119	0
Erwinia_unclassified	0	0	0	0	0	0	0	0	0	0	0	0	0	0	0	0	0	0	0	0	0	0	0	0	0	0	0	0	0	0	0	0.000943968	0	0	0	0	0	0	0	0	0	0	0	0	0	0	0	0
Escherichia_albertii	0	0	0	0	0	0	0	0	0	0	0	0	0	0	0	0	0	0	0	0	0	0	0	0	0	0	0	0	0	0	0.00459421	0	0	0	0	0	0	0	0	0	0	0	0	0	0	0	0.00123245	0
Escherichia_coli	0.0238723	0.0231268	0.0217576	0	0.0797453	0	0	0	0	0	0	0.0758466	0	0	0	0.0595123	0.0457627	0.0300446	0.329045	0.0373055	0.304671	0	0	0	0	0	0	0	0	0	0.399276	0.0851069	0.00956168	0.0195078	0.014578	0.0796231	0	0	0.0145299	0.40104	0	0.069754	0	0	0	0.0292295	0.00911591	0
Escherichia_fergusonii	0	0.000626375	0	0	0	0	0	0	0	0	0	0	0	0	0	0	0	0	0	0	0	0	0	0	0	0	0	0	0	0	0.00190901	0.000344623	0	0	0	0	0	0	0	0	0	0	0	0	0	0	0	0
Escherichia_unclassified	0.0779449	0.0267008	0.000781213	0	0	0.0318236	0.0564803	0	0	0.0765342	0	0.00387852	0.0482505	0.134697	0.0590621	0.00303942	0.135873	0	0.276541	0.0752122	0.102635	0.0659297	0.0360888	0.0696977	0.0799706	0.0791055	0	0	0	0.127697	0	0.0589905	0.0672295	0	0	0.0390753	0.105766	0.0217303	0	0.193598	0.320575	0.0704924	0	0.0698211	0	0	0.0747335	0.193038
Klebsiella_oxytoca	0	0	0	0	0	0	0	0	0	0	0	0	0	0	0	0	0	0	0	0	0	0	0	0	0	0	0	0	0.00205067	0	0.00136358	0.00290682	0	0	0	0	0	0	0	0	0	0	0	0	0	0	0.0014237	0
Klebsiella_pneumoniae	0	0	0	0	0	0	0	0	0	0	0	0	0	0	0	0	0	0	0	0	0	0	0	0	0	0	0	0	0	0	0	0	0	0	0.00189735	0	0	0	0	0	0	0	0	0	0	0	0.00352737	0
Klebsiella_unclassified	0	0.0278061	0.0186328	0.00604516	0	0.00329932	0	0.00925426	0	0.0160465	0	0.031988	0	0	0.0352472	0	0.0176779	0.0134423	0.0910272	0.00765055	0	0.0128874	0.0146424	0	0.0292595	0	0.00427949	0	0.00904706	0	0.0379075	0.0016482	0.0270914	0.00413669	0.0309268	0.0334655	0.0472116	0.00917228	0.011914	0	0.0127899	0.0219462	0.0231244	0.0544452	0	0.00621716	0.00446233	0.029247
Pantoea_unclassified	0	0	0.0434654	0	0	0	0	0	0	0	0	0	0	0	0	0	0	0	0	0	0	0	0	0	0	0	0	0	0	0	0	0	0	0	0	0	0	0	0	0	0	0	0	0	0	0	0	0
Pectobacterium_carotovorum	0	0	0	0	0	0	0	0	0	0	0	0	0	0	0	0	0	0	0	0	0	0	0	0	0	0	0	0	0	0	0.00146847	0	0	0	0	0	0	0	0	0	0	0	0	0	0	0	0	0
Photorhabdus_unclassified	0	0	0	0	0	0	0	0	0	0	0	0	0	0	0	0	0	0	0	0	0	0	0	0	0	0	0	0	0	0	0.000650322	0	0	0	0.000727318	0	0	0	0	0	0	0	0	0	0	0	0.00053123	0
Proteus_mirabilis	0	0	0	0	0	0	0	0	0	0	0	0	0	0	0	0	0	0	0	0	0	0	0	0	0	0	0	0	0	0	0.00255933	0	0	0	0.000853809	0	0	0	0	0	0	0	0	0	0	0	0	0
Proteus_unclassified	0	0	0	0	0	0	0	0	0	0	0	0	0	0	0	0	0	0	0	0	0	0	0	0	0	0	0	0	0	0	0	0.00139348	0	0	0.00358916	0	0	0	0	0	0	0	0	0	0	0	0	0
Providencia_stuartii	0	0	0	0	0	0	0	0	0	0	0	0	0	0	0	0	0	0	0	0	0	0	0	0	0	0	0	0	0	0	0.000377606	0	0	0	0	0	0	0	0	0	0	0	0	0	0	0	0	0
Providencia_unclassified	0	0.00881838	0	0	0	0	0	0	0	0	0	0	0	0	0	0	0	0	0.0265608	0	0.0479543	0	0	0	0	0	0.126598	0	0.0109017	0	0.0125659	0.00558889	0	0.137019	0	0	0	0	0.0260942	0	0	0	0	0	0	0	0	0
Rahnella_aquatilis	0	0	0.0359358	0	0	0	0	0	0	0	0	0	0	0	0	0	0	0	0	0	0	0	0	0	0.0109503	0	0	0	0.0124548	0	0	0	0	0	0.059229	0	0	0	0	0	0	0.037264	0	0	0	0	0.00905216	0
Salmonella_bongori	0	0	0	0	0	0	0	0	0	0	0	0	0	0	0	0	0	0	0	0	0	0	0	0	0	0	0	0	0	0	0	0	0	0	0.000853809	0	0	0	0	0	0	0	0	0	0	0	0.000594978	0
Serratia_marcescens	0	0.000847449	0	0	0	0	0	0	0	0	0	0	0	0	0	0	0	0	0	0	0	0	0	0	0	0	0	0	0	0	0.00610463	0.00561885	0	0	0.00118585	0	0	0	0	0	0	0	0	0	0	0	0.00841469	0
Shigella_flexneri	0	0	0	0	0.0704922	0	0	0	0	0	0	0	0	0	0	0	0	0	0	0	0	0	0	0	0	0	0	0	0	0	0.154252	0	0	0	0	0	0	0	0	0	0	0	0	0	0	0	0.013812	0
Shigella_sonnei	0	0	0	0	0	0	0	0	0	0	0	0	0	0	0	0	0	0	0	0	0	0	0	0	0	0	0	0	0	0	0.00918841	0	0	0	0	0	0	0	0	0	0	0	0	0	0	0	0	0
Shimwellia_blattae	0	0	0	0	0	0	0	0	0	0	0	0	0	0	0	0	0	0	0	0	0	0	0	0	0	0	0	0	0	0	0.000881081	0.000419541	0	0	0	0	0	0	0	0	0	0	0	0	0	0	0	0
Wigglesworthia_glossinidia	0	0	0	0	0	0	0	0	0	0	0	0	0	0	0	0	0	0	0	0	0	0	0	0	0	0	0	0	0	0	0	0	0	0	0.299813	0	0	0	0	0	0	0	0	0	0	0	0.320459	0
Xenorhabdus_unclassified	0	0	0	0	0	0	0	0	0	0	0	0	0	0	0	0	0	0	0	0	0	0	0	0	0	0	0	0	0	0	0.000964993	0	0	0	0	0	0	0	0	0	0	0	0	0	0	0	0	0
Yersinia_pseudotuberculosis	0	0	0	0	0	0	0	0	0	0	0	0	0	0	0	0	0	0	0	0	0	0	0	0	0	0	0	0	0	0	0.00109086	0	0	0	0.00166018	0	0	0	0	0	0	0	0	0	0	0	0	0
Yersinia_unclassified	0	0.0029108	0	0	0	0	0	0	0	0	0	0	0	0	0	0	0	0	0	0	0	0	0	0	0	0	0	0	0	0	0.00279009	0	0	0	0	0	0	0	0	0	0	0	0	0	0	0	0	0
Coxiella_burnetii	0	0	0	0	0	0	0	0	0	0	0	0	0	0	0	0	0	0	0	0	0	0	0	0	0	0	0	0	0	0	0.00226564	0.000914	0	0	0.00074313	0	0	0	0	0	0	0	0	0	0	0	0.00675725	0
Fluoribacter_dumoffii	0	0	0.00132972	0	0	0	0	0	0	0	0	0	0	0	0	0	0	0	0	0	0	0	0	0	0	0	0	0	0	0	0.00331454	0.00107882	0	0	0.00241912	0	0	0	0	0	0	0	0	0	0	0	0.00701224	0
Legionella_longbeachae	0	0	0.00123	0	0	0	0	0	0	0	0	0	0	0	0	0	0	0	0	0	0	0	0.0145734	0.00387579	0	0	0	0	0	0	0.00232857	0.00211269	0	0	0.00909148	0	0	0	0	0	0	0	0	0	0	0	0.00509981	0
Legionella_pneumophila	0	0	0	0	0	0	0	0	0	0	0	0	0	0	0	0	0.00607764	0	0	0	0	0	0	0	0.000994021	0	0	0	0	0	0.00329356	0	0	0	0.000600828	0	0	0	0	0	0	0	0	0	0	0	0.00754347	0
Methylobacter_unclassified	0	0.00483906	0.00166216	0	0	0	0	0	0	0	0	0	0	0	0	0	0	0	0.0214339	0	0	0.0116213	0.00262046	0	0.00984401	0	0	0	0.000889628	0	0.0175377	0.00588856	0.00413289	0	0.00902824	0.00564479	0.00190357	0	0	0	0	0.0122095	0	0	0.00808274	0	0.0116021	0.00278716
Methylococcus_capsulatus	0	0.00745509	0	0	0	0	0	0	0	0	0	0	0	0	0	0	0	0	0	0	0	0	0	0	0	0	0	0	0.00254826	0	0.00541235	0.0070423	0	0	0.00586598	0	0	0	0	0	0	0	0	0	0.00196522	0	0.0125158	0
Methylomonas_unclassified	0	0.0055514	0.0191979	0	0	0.00345643	0	0	0.0242198	0	0	0	0	0	0	0	0.00657717	0	0.0114479	0.00786913	0	0.00693499	0	0	0.00868967	0.0273501	0.0168515	0	0.00259349	0	0.00232857	0.0143393	0.0282122	0.0040496	0.00275116	0	0.0110281	0.0134968	0	0	0	0.0143217	0	0	0	0	0.00960464	0
Alcanivorax_unclassified	0	0	0.0150259	0	0.0639587	0.0326615	0	0	0	0	0	0	0	0.0210424	0.053729	0	0.00982413	0.0444264	0.0334377	0.0127509	0	0.00992063	0	0	0	0.0851766	0	0	0.0270658	0	0.0356208	0.01371	0	0	0.00472757	0	0.00830646	0.0312719	0	0	0	0.0104064	0	0	0.00882763	0.0288906	0.0374411	0.0242519
Candidatus_Portiera_aleyrodidarum	0.181418	0.0457254	0.153001	0.0867813	0.198874	0.11881	0.0779254	0.265203	0.132074	0.155448	0.155642	0.0963165	0.0349802	0.1762	0.248539	0.367329	0.254206	0.16826	0.151664	0.123757	0.183309	0.22192	0.196971	0.175695	0.0920592	0.0390997	0.0736291	0.110775	0.0566045	0.221596	0.0892828	0.0325444	0.117577	0.0578701	0.103026	0.109144	0.091434	0.0423371	0.0413751	0.199032	0.444988	0.156182	0.0658943	0.101606	0.0698127	0.0838874	0.0916478	0.17255
Halomonas_unclassified	0.895144	1.41948	0.15857	1.55597	1.22133	1.11903	1.98613	0	2.88439	1.74942	2.33889	1.12136	0.509083	2.36858	0.207713	1.75961	0.638791	2.78672	1.54888	1.18698	0.47748	1.85493	1.14197	1.59315	0.421882	0.0927428	0.284907	0.360244	0.343472	1.79629	0.816636	2.0319	0.202582	2.49591	3.87665	6.33104	0.929852	0	0.102745	0.597473	0.450932	0.739784	0.796084	0.736615	0.200135	0.412616	0.688241	1.49355
Marinomonas_unclassified	0	0.00171946	0	0	0	0	0	0	0	0	0	0	0	0	0	0	0	0	0	0	0	0	0	0	0.00282174	0	0	0	0	0	0.00618854	0.00379085	0	0	0.000442716	0	0	0	0	0	0	0	0	0	0	0	0.00131745	0
Actinobacillus_minor	0	0	0	0	0	0	0	0	0	0	0	0	0	0	0	0	0	0	0	0	0	0	0	0	0	0	0	0	0	0	0.00740527	0	0	0	0.00139139	0	0	0	0	0	0	0	0	0	0	0	0	0
Actinobacillus_pleuropneumoniae	0	0	0	0	0	0	0	0	0	0	0	0	0	0	0	0	0	0	0	0	0	0	0	0	0	0	0	0	0	0	0.00904157	0.000359607	0	0	0	0	0	0	0	0	0	0	0	0	0	0	0.00189118	0
Actinobacillus_unclassified	0	0.0352735	0.170238	0	0.0720841	0.0280879	0	0.073467	0	0.12842	0	0.0668946	0	0	0.0495607	0	0.330218	0.235899	0.0461828	0.165489	0	0	0.272459	0.0940376	0.0838825	0.088499	0.08374	0	0.0608113	0.211196	0.235458	0.03196	0	0.0160968	0.0481611	0.0490851	0.285362	0.101434	0.0980571	0.071272	0	0.299966	0	0.0988472	0	0.0273879	0	0.0319256
Aggregatibacter_actinomycetemcomitans	0	0	0	0	0	0	0	0	0	0	0	0	0	0	0	0	0	0	0	0	0	0	0	0	0	0	0	0	0	0	0.0106359	0.00890027	0	0	0	0	0	0	0	0	0	0	0	0	0	0	0	0
Aggregatibacter_aphrophilus	0	0	0	0	0	0	0	0	0	0	0	0	0	0	0	0	0	0	0	0	0	0	0	0	0	0	0	0	0	0	0.00927233	0.00277197	0	0	0	0	0	0	0	0	0	0	0	0	0	0	0	0
Aggregatibacter_unclassified	0.0375728	0.0366491	0.073085	0.012214	0.206817	0.0217162	0.028049	0.0244117	0	0.0183618	0	0.0100293	0	0.0379453	0	0	0.0198703	0.185528	0.0377204	0.0752122	0	0.0133976	0.0836709	0.0283486	0.0597695	0.0575848	0.0323862	0	0.0293426	0.146993	0.0607526	0.0389424	0.0060067	0.00756216	0.0154002	0.00676674	0.0982302	0.0375971	0	0.0111035	0.0352851	0.164236	0.00928754	0.126728	0.00461192	0	0.03368	0.027763
Gallibacterium_anatis	0	0	0	0	0	0	0	0	0	0	0	0	0	0	0	0	0	0	0	0	0	0	0	0	0	0	0	0	0	0	0.00266422	0	0	0	0.00268792	0	0	0	0	0	0	0	0	0	0	0	0.00108371	0
Haemophilus_influenzae	0.00404115	0.00257919	0.010455	0	0.0403121	0	0	0	0	0	0	0	0	0	0	0	0.0023589	0.0662552	0	0	0	0	0.00839008	0	0	0	0.00471841	0	0	0	0.0308798	0.00608335	0	0	0.00194479	0	0.0283647	0	0	0	0	0.0245393	0	0.0457175	0	0	0.012282	0
Haemophilus_parainfluenzae	0	0.00144926	0	0	0.010762	0	0	0	0	0	0	0	0	0	0	0	0	0.00538035	0	0	0	0	0	0	0	0	0	0	0	0	0.0290337	0.00566381	0	0	0	0	0	0	0	0	0	0.0148541	0	0	0	0	0.00359112	0
Haemophilus_parasuis	0	0	0	0	0	0	0	0	0	0	0	0	0	0	0	0	0	0	0	0	0	0	0	0	0	0	0	0	0	0	0.00211879	0	0	0	0	0	0	0	0	0	0	0	0	0	0	0	0.00395235	0
Haemophilus_sputorum	0	0	0	0	0	0	0	0	0	0	0	0	0	0	0	0	0	0.00228879	0	0	0	0	0	0	0	0	0	0	0	0	0.00765701	0	0	0	0	0	0	0	0	0	0	0	0	0	0	0	0.00369736	0
Histophilus_somni	0	0.00133872	0	0	0	0	0	0	0	0	0	0	0	0	0	0	0.00480106	0	0.006424	0	0	0	0	0	0.00477771	0	0	0	0	0	0.00780386	0.00152833	0	0	0.00335199	0	0	0	0	0	0	0	0	0	0	0	0.00135995	0
Mannheimia_haemolytica	0	0	0	0	0	0	0	0	0	0	0	0	0	0	0	0	0	0	0	0	0	0	0	0	0	0	0	0	0	0	0.00352432	0	0	0	0	0	0	0	0	0	0	0	0	0	0	0	0.000679975	0
Pasteurella_multocida	0	0	0	0	0	0	0	0	0	0	0	0	0	0	0	0	0	0	0	0	0	0	0	0	0	0	0	0	0	0	0.00438443	0.00203777	0	0	0	0	0	0	0	0	0	0	0	0	0	0	0.00458983	0
Pasteurella_unclassified	0.0300031	0.0327557	0.0771074	0	0.218259	0.00446892	0	0	0	0.0765985	0	0	0	0.0195718	0.0172252	0.0698834	0.0762064	0.122211	0.0149482	0.106889	0.0263444	0.0196523	0.0844754	0.0197333	0.0174435	0.0578717	0.0178234	0	0.00358867	0.111518	0.00253835	0.0262962	0	0.0224107	0.00719413	0	0.0651617	0	0.0169256	0.0125129	0.0898553	0.100098	0	0.0973054	0	0.0169572	0.013217	0.118146
Acinetobacter_baumannii	0	0.000650939	0.00182837	0	0	0	0	0	0	0	0	0	0	0	0	0	0	0	0	0	0	0	0	0	0.00601222	0	0	0	0	0	0.00169923	0.00268207	0.00148854	0	0.0023875	0	0	0	0	0	0	0	0	0	0	0	0.00484482	0
Acinetobacter_baylyi	0	0	0	0	0	0	0	0	0	0	0	0	0	0	0	0	0	0	0	0	0	0	0	0	0	0	0	0	0	0	0	0	0	0	0	0	0	0	0	0	0	0	0	0	0	0	0.000658725	0
Acinetobacter_beijerinckii	0	0	0	0	0	0	0	0	0	0	0	0	0	0	0	0	0	0	0	0	0	0	0	0	0	0	0	0	0	0	0	0.00086905	0	0	0.00162856	0	0	0	0	0	0	0	0	0	0	0	0.00386736	0
Acinetobacter_bereziniae	0	0	0	0	0	0	0	0	0	0	0	0	0	0	0	0	0	0	0	0	0	0	0	0	0	0	0	0	0	0	0	0.00221757	0	0	0.000917054	0	0	0	0	0	0	0	0	0	0	0	0	0
Acinetobacter_brisouii	0	0	0	0	0	0	0	0	0	0	0	0	0	0	0	0	0	0	0	0	0	0	0	0	0	0	0	0	0	0	0	0	0	0	0.000980299	0	0	0	0	0	0	0	0	0	0	0	0	0
Acinetobacter_guillouiae	0	0	0	0	0	0	0	0	0	0	0	0	0	0	0	0	0	0	0	0	0	0	0	0	0	0	0	0	0	0	0	0	0	0	0.00166018	0	0	0	0	0	0	0	0	0	0	0	0.00231616	0
Acinetobacter_gyllenbergii	0	0	0	0	0	0	0	0	0	0	0	0	0	0	0	0	0	0	0	0	0	0	0	0	0.00177962	0	0	0	0	0	0.00243346	0.00251725	0.0104023	0	0.00442716	0	0	0	0	0	0	0	0	0	0	0	0.00686349	0
Acinetobacter_indicus	0	0	0	0	0	0	0	0	0	0	0	0	0	0	0	0	0	0	0	0	0	0	0	0	0	0	0	0	0	0	0	0.00110879	0	0	0.00513866	0	0	0	0	0	0	0	0	0	0	0	0.00269865	0
Acinetobacter_oleivorans	0	0.00620234	0	0	0	0	0	0	0	0	0	0	0	0	0	0.0275172	0.00410726	0	0.00193544	0	0	0.0042706	0.0093785	0.0134434	0	0	0	0	0	0	0.0035453	0.00618823	0	0	0.00689371	0	0.00165185	0	0	0.0111504	0	0.00468805	0	0	0	0	0.0102209	0.00725747
Acinetobacter_parvus	0	0	0	0	0	0	0	0	0	0	0	0	0	0	0	0	0	0	0	0	0	0	0	0	0	0	0	0	0	0	0.00192999	0.000419541	0	0	0	0	0	0	0	0	0	0	0	0	0	0	0	0
Acinetobacter_pittii_calcoaceticus_nosocomialis	0	0	0	0	0	0	0	0	0	0	0	0	0	0	0	0	0	0	0.0213927	0	0	0	0	0.0556341	0	0	0	0	0	0	0.00841222	0.0147439	0	0	0.00479082	0	0	0	0	0	0	0	0	0	0	0	0	0
Acinetobacter_schindleri	0	0	0	0	0	0	0	0	0	0	0	0	0	0	0	0	0	0	0	0	0	0	0	0	0	0	0	0	0	0	0.000398584	0.00214266	0	0	0.00622964	0	0	0	0	0	0	0	0	0	0	0	0.000658725	0
Acinetobacter_sp_CIP_A162	0	0	0	0	0	0	0	0	0	0	0	0	0	0	0	0	0	0	0	0	0	0	0	0	0	0	0	0	0	0	0.0189432	0	0	0	0	0	0	0	0	0	0	0	0	0	0	0	0	0
Acinetobacter_tjernbergiae	0	0	0	0	0	0	0	0	0	0	0	0	0	0	0	0	0	0	0	0	0	0	0	0	0	0	0	0	0	0	0.00329356	0	0	0	0.00422161	0	0	0	0	0	0	0	0	0	0	0	0.00998713	0
Acinetobacter_unclassified	0.290667	0	0.165867	0.0606526	0.303775	0	0.116141	0.104091	0	0.0487825	0.0785818	0.0469732	0.434912	0.151345	0.0732223	0.12334	0.301273	0.0785532	0.111452	0	0	0	0.0387323	0.235869	0.100893	0.118779	0.114088	0	0.0492914	0	0.0967091	0.540174	0	0.0216124	0	0.0481034	0.0300323	0.0695	0.0334109	0	0.231949	0	0	0.0911805	0	0.06556	0.00560979	0.0791082
Acinetobacter_venetianus	0	0	0	0	0	0	0	0	0	0	0	0	0	0	0	0	0	0	0	0	0	0	0	0	0	0	0	0	0	0	0.000482497	0	0	0	0	0	0	0	0	0	0	0	0	0	0	0	0	0
Cellvibrio_unclassified	0.21558	0.0171823	0.0597545	0.125758	0.0382393	0.122721	0.0474782	0.0752456	0.464829	0.135945	0.0569926	0.0675215	0.0431566	0.169755	0	0.0535727	0.102543	0.0799367	0.095907	0.0967248	0.0821973	0.214172	0.376818	0.117182	0.219919	0.0665102	0.126817	0.0870782	0.037108	0.119575	0.0380753	0.02745	0.13649	0.0171564	0.0425007	0.204019	0.0452923	0.144987	0.0732709	0	0.111999	0.0325587	0.140021	0.0608106	0.0469433	0.171252	0.0555454	0.137222
Pseudomonas_aeruginosa	0	0.0134855	0.00410552	0	0.00781036	0.00144891	0	0	0	0	0	0	0	0	0	0	0.00285843	0.00292076	0	0.00670334	0	0	0.0130104	0	0.0157761	0.00480251	0.00183407	0	0.00223161	0	0.0111813	0.0107432	0	0	0.012396	0.00362879	0.00237552	0.0233154	0	0	0	0	0	0	0	0	0.0235654	0.0034387
Pseudomonas_alcaligenes	0	0.0239251	0	0	0	0	0	0	0	0.0242948	0	0.0506166	0	0	0.0375153	0	0	0.0805003	0.0349614	0	0	0.0627929	0.0458121	0.0221252	0.0126978	0.0167484	0.0390327	0.0650418	0.0310013	0	0.0167615	0.0102788	0.0121885	0	0.0127913	0.0251211	0.016786	0.0413984	0	0.0269678	0	0.0222553	0	0.0443313	0.0361346	0	0.0324263	0.0490286
Pseudomonas_amygdali	0	0.0047408	0	0	0	0	0	0	0	0	0	0	0	0	0	0	0	0	0	0	0	0	0	0	0	0	0.00540814	0	0.00484018	0	0.00304183	0.00418043	0	0	0.00172343	0	0	0	0	0	0	0	0	0	0	0	0.00369736	0
Pseudomonas_fragi	0	0	0	0	0	0	0	0	0	0	0	0	0	0	0	0	0	0	0	0	0	0	0	0	0	0	0	0	0	0	0	0	0	0	0	0	0	0	0	0	0	0	0	0	0	0	0.00550355	0
Pseudomonas_fuscovaginae	0	0	0	0	0	0	0	0	0	0	0	0	0	0	0	0	0	0	0	0	0	0	0	0	0	0	0	0	0	0	0	0.00122866	0	0	0	0	0	0	0	0	0	0	0	0	0	0	0.000701224	0
Pseudomonas_mandelii	0	0	0	0	0	0	0	0	0	0.0218187	0	0	0	0	0	0	0	0	0	0	0.0288288	0.0192366	0.0223889	0	0	0	0	0	0.0151538	0.0384188	0.00969189	0.00979928	0	0	0	0.0244374	0	0	0	0.0255427	0	0	0	0.0215716	0.0172273	0	0.0230341	0
Pseudomonas_mendocina	0	0.0212968	0.0163889	0	0	0.00834431	0	0	0	0	0	0	0	0	0	0	0.0161515	0	0.00821531	0	0	0	0.0302273	0	0.0121367	0.0102091	0.0239839	0	0.0156062	0	0.0158175	0.0136051	0	0.00445601	0.00765265	0.00306782	0.00995832	0.0161592	0.00231804	0	0	0	0	0	0.0155474	0.0045671	0.020208	0.0149131
Pseudomonas_protegens	0	0.0169735	0.0172864	0	0	0	0	0	0	0	0	0	0	0	0	0	0.00560586	0	0	0	0	0	0.00668907	0	0.0109823	0	0.00724221	0	0.0126056	0	0.0207264	0.00332636	0	0.00354159	0.0053284	0.00352361	0.00961222	0.00781798	0	0.00772074	0	0.00628507	0	0	0	0.0106222	0.0256478	0
Pseudomonas_putida	0	0	0.0023935	0	0	0	0	0	0	0	0	0	0	0	0	0	0	0	0	0	0	0.0106198	0	0	0	0	0	0	0.00520206	0	0.0042166	0.00561885	0	0	0	0	0	0	0	0	0	0	0	0	0	0	0.00199743	0
Pseudomonas_savastanoi	0	0	0	0	0	0	0	0	0	0	0	0	0	0	0	0	0	0	0	0	0	0	0	0	0	0	0	0	0	0	0.00530746	0.001828	0	0	0.000790563	0	0	0	0	0	0	0	0	0	0	0	0	0
Pseudomonas_stutzeri	0.0145876	0.00993603	0.0198129	0	0	0	0	0	0	0	0	0	0.0275556	0	0	0	0.00876956	0	0	0	0	0	0	0	0.0383339	0.0221248	0	0	0.0179132	0	0.00648224	0.00762666	0	0	0.00517029	0	0	0.0420909	0	0	0	0	0	0	0	0.00835338	0.0108371	0
Pseudomonas_syringae	0	0	0	0	0	0	0	0	0	0	0	0	0	0	0	0	0	0	0	0	0	0	0	0	0	0	0	0	0	0	0	0.00686249	0	0	0.0252348	0	0	0	0	0	0	0	0	0	0	0	0	0
Pseudomonas_syringae_group_genomosp_3	0	0	0	0	0	0	0	0	0	0	0	0	0	0	0	0	0	0	0	0	0	0	0	0	0	0	0	0	0	0	0	0	0	0	0.00264048	0	0	0	0	0	0	0	0	0	0	0	0	0
Pseudomonas_tolaasii	0	0.0012159	0	0	0	0	0	0	0	0	0	0	0	0	0	0	0	0	0	0	0	0	0	0	0	0	0	0	0	0	0.000713256	0.00217262	0	0	0	0	0	0	0	0	0	0	0	0	0	0	0.00118996	0
Pseudomonas_unclassified	0.168269	1.32808	0.425894	0.317858	0.615924	0.847419	2.02863	0.629006	2.5533	0.0913426	0.238896	0.235728	0	2.17733	0	0.224662	0.510355	0.371996	0.253439	0.397428	0.296304	0.262585	0.400264	0.47856	0.628253	0.514442	1.0138	0.302912	1.0795	0.190934	1.53635	0.458858	0.401643	0.6121	0.851627	0.650834	0.626084	0.181445	0.207575	0.702587	0.921173	0.727077	0.813132	0.561087	1.46424	1.76763	0.584736	0.0713078
Francisella_novicida	0	0.00197738	0.0274256	0.0197434	0.0420367	0.0229032	0	0.00580002	0	0.0272532	0	0.00946123	0	0	0	0.0744542	0.0216464	0.0344001	0.0402529	0	0.0105003	0.0247543	0.030641	0.0247386	0.0359771	0	0	0	0.00149277	0.0152773	0.00946113	0.00436023	0.00725006	0	0.0246656	0.00753807	0	0.00777181	0	0.0305698	0.058984	0.0299314	0	0.0173987	0.00662468	0	0.0274115	0.0175917
Francisella_philomiragia	0	0.00297221	0.0145771	0	0	0.00551632	0	0	0	0.0186512	0	0.0119881	0	0	0	0.03877	0.0147362	0	0.0160188	0	0	0.00810657	0.0202971	0.0125797	0.0209867	0	0	0	0	0	0.00727941	0.00918495	0.000980685	0	0.00744711	0.00589022	0.00789743	0	0	0.0103204	0.0064451	0.0105266	0	0	0	0	0.0151932	0
Francisella_tularensis	0	0.00217389	0.00588403	0	0.0186885	0	0	0.0219885	0	0	0	0	0	0	0.0183286	0	0	0	0.0141246	0	0	0	0.00972329	0.0130891	0.0216119	0	0	0	0	0	0.00876885	0.00624817	0.0190533	0	0.0124118	0	0	0	0	0	0.0283886	0.0158844	0	0	0	0	0.0571604	0
Francisella_unclassified	0	0	0	0	0	0	0	0	0	0	0	0	0	0	0	0	0	0	0	0	0	0	0	0	0	0	0	0	0	0	0	0	0.00754777	0	0	0	0	0.00213917	0	0	0	0	0	0	0	0	0	0
Methylophaga_unclassified	0	0	0	0	0	0	0	0	0	0	0	0	0	0	0	0	0	0	0	0	0	0	0	0	0	0	0	0	0	0	0.00816049	0.00425535	0	0	0.00268792	0	0	0	0	0	0	0	0	0	0	0	0.00380361	0
Piscirickettsia_salmonis	0	0	0	0	0	0	0	0	0	0	0	0	0	0	0	0	0	0	0	0	0	0	0	0	0	0	0	0	0	0	0	0	0	0	0	0	0	0	0	0	0	0	0	0	0	0	0.000552479	0
Thioalkalimicrobium_unclassified	0	0	0	0	0	0	0	0	0	0	0	0	0	0	0	0	0	0.00418472	0	0	0	0	0	0	0	0	0	0	0	0	0.00077619	0.00136351	0	0	0	0	0	0	0	0	0	0	0	0	0	0	0.0054398	0.00258807
Thiomicrospira_unclassified	0	0	0	0	0.025023	0	0	0	0	0	0	0	0	0	0	0	0	0.0179858	0.0158953	0	0	0	0	0	0	0	0	0	0	0	0	0	0.0120309	0	0.0117636	0	0	0	0	0	0	0	0	0.0198175	0	0	0	0
Thiothrix_unclassified	0	0	0	0	0	0	0	0	0	0	0	0	0	0	0	0	0	0	0.0423531	0	0	0	0	0	0	0	0	0	0	0	0.0132372	0	0	0	0	0	0	0	0	0	0.0986577	0	0	0	0	0	0.00711848	0
Aliivibrio_fischeri	0	0	0	0	0	0	0	0	0	0	0	0	0	0	0	0	0	0	0	0	0	0	0	0	0	0	0	0	0	0	0.000377606	0	0	0	0.00213452	0	0	0	0	0	0	0	0	0	0	0	0.00475982	0
Aliivibrio_logei	0	0	0	0	0	0	0	0	0	0	0	0	0	0	0	0	0	0	0	0	0	0	0	0	0	0	0	0	0	0	0	0	0	0	0	0	0	0	0	0	0	0	0	0	0	0	0.00163619	0
Aliivibrio_unclassified	0	0	0.00851024	0	0	0	0	0	0	0	0	0	0	0	0	0	0	0.00854025	0	0	0	0	0	0	0	0	0	0	0	0	0.00847516	0.00142344	0	0	0	0	0	0	0	0	0	0	0	0	0	0	0	0
Enterovibrio_unclassified	0	0	0	0	0	0	0	0	0	0	0	0	0	0	0	0	0	0	0	0	0	0	0	0	0	0	0	0	0	0	0	0.000524426	0	0	0	0	0	0	0	0	0	0	0	0	0	0	0.00424984	0
Photobacterium_profundum	0	0	0	0	0	0	0	0	0	0	0	0	0	0	0	0	0	0	0	0	0	0	0	0	0	0	0	0	0	0	0.0006713	0	0	0	0	0	0	0	0	0	0	0	0	0	0	0	0	0
Photobacterium_unclassified	0	0	0	0	0	0	0	0	0	0	0	0	0	0	0	0	0	0	0	0	0	0.045975	0	0	0	0.0309294	0	0	0	0	0.0130484	0	0	0	0	0	0	0.0476004	0	0	0	0	0	0	0	0	0	0
Vibrio_anguillarum	0	0	0	0	0	0	0	0	0	0	0	0	0	0	0	0	0	0	0	0	0	0	0	0	0	0	0	0	0	0	0	0	0	0	0.000774752	0	0	0	0	0	0	0	0	0	0	0	0	0
Vibrio_furnissii	0	0	0	0	0	0	0	0	0	0	0	0	0	0	0	0	0	0	0	0	0	0	0	0	0	0	0	0	0	0	0	0.00137849	0	0	0	0	0	0	0	0	0	0	0	0	0	0	0	0
Pseudoxanthomonas_unclassified	0.0873282	0.107712	0.128385	0.0385746	0.161331	0.0965531	0.128897	0.139922	0.0562252	0.0619991	0.0778289	0.0513414	0.0506	0.111893	0.0301594	0.0462873	0.0747633	0.109674	0.154402	0.11443	0.090635	0.0933673	0.123644	0.0645595	0.0776779	0.079181	0.0787394	0.0919409	0.174126	0.0321661	0.03925	0.0662126	0.0618007	0.0456923	0.117873	0.0898959	0.0670338	0.0655756	0.0348225	0.168447	0.0843381	0.106812	0.103737	0.0638518	0.0874046	0.100167	0.0685287	0.16227
Rhodanobacter_unclassified	0.076427	0.0535244	0.0985658	0.0117347	0.105299	0.0382302	0.109085	0.0469931	0.040185	0.0654721	0.0613412	0.0980599	0.0489647	0.0444995	0.0345116	0.0288629	0.0730427	0.0774088	0.126647	0.0743925	0.0417901	0.0826719	0.111002	0.0528879	0.0717298	0.0693041	0.0456635	0.00702129	0.0877113	0.0296736	0.0631651	0.0575071	0.041539	0.0474776	0.0504696	0.0838129	0.116055	0.0431528	0.0541179	0.169621	0.0498806	0.13573	0.0887668	0.0663697	0.0502873	0.068595	0.0983838	0.073552
Stenotrophomonas_maltophilia	0.0570492	0.0825587	0.0799829	0.0153525	0.0846039	0.0474648	0.125856	0.107855	0.0401099	0.0489111	0.0769377	0.193867	0.191536	0.179305	0	0.0731317	0.0688244	0.0380383	0.14209	0.0802032	0.0502043	0.071353	0.0847053	0.102254	0.0400975	0.0586117	0.117835	0.0723714	0.118803	0.0995924	0.0685565	0.117786	0.030086	0.0395671	0.0852702	0.0442643	0.0642178	0.0532946	0.0296943	0.047593	0	0.0993419	0.0105154	0.123036	0.098134	0.027049	0.12129	0.109912
Stenotrophomonas_unclassified	0	0	0	0	0	0.00446892	0	0	0	0	0	0	0	0	0	0	0	0.0168584	0	0	0.0262975	0	0	0	0	0	0	0	0	0	0	0	0.0018563	0	0	0	0	0	0	0.00823755	0.0145955	0	0.00705223	0	0	0.00540686	0	0
Wohlfahrtiimonas_chitiniclastica	0	0	0	0	0	0	0	0	0	0	0	0	0	0	0	0	0	0	0	0	0	0	0	0	0	0	0	0	0	0	0	0	0	0	0.000347848	0	0	0	0	0	0	0	0	0	0	0	0	0
Xanthomonas_axonopodis	0	0	0	0	0	0	0	0	0	0	0	0	0	0	0	0	0	0	0	0	0	0	0	0	0	0	0	0	0	0	0	0.00053941	0	0	0	0	0	0	0	0	0	0	0	0	0	0	0	0
Xanthomonas_fuscans	0	0	0	0	0	0	0	0	0	0	0	0	0	0	0	0	0	0	0	0	0	0	0	0	0	0	0	0	0.00351328	0	0.0030628	0.0097843	0	0	0	0	0	0	0	0	0	0	0	0	0	0	0.0128983	0
Xanthomonas_oryzae	0	0	0	0	0	0	0	0	0	0	0	0	0	0	0	0	0	0	0	0	0	0	0	0	0	0	0	0	0.00915261	0	0	0	0	0	0	0	0	0	0	0	0	0	0	0	0	0	0	0
Xanthomonas_translucens	0	0.00957986	0.00995631	0	0	0	0	0	0	0	0	0	0	0	0	0	0.00260867	0	0.0074329	0	0	0.00296674	0.0191478	0	0	0	0	0	0.00848916	0	0.00769897	0.0178605	0	0	0.0135661	0	0	0	0	0	0	0	0	0	0	0	0.012537	0
Mariprofundus_ferrooxydans	0	0	0	0	0	0	0	0	0	0	0	0	0	0	0	0	0	0	0	0	0	0	0	0	0	0	0	0	0	0	0	0.00127361	0	0	0.000758941	0	0	0	0	0	0	0	0	0	0	0	0.00165744	0
Zetaproteobacteria_noname_unclassified	0	0	0	0	0	0	0	0	0	0	0	0	0	0	0	0	0	0	0.00374733	0	0	0	0	0	0	0	0	0	0	0	0	0.00205275	0	0	0	0.00261203	0.013325	0	0	0	0	0	0	0	0	0	0.00458983	0
Brachyspira_hampsonii	0.146191	0.113988	0.245783	0.0567719	0.117935	0.193735	0.0627366	0.298611	0.122956	0.259637	0.0521523	0.118471	0.0747722	0.0858943	0.152145	0.418767	0.263781	0.203036	0.218498	0.0759408	0.133995	0.255329	0.290802	0.246411	0.195934	0.103903	0.154563	0.164882	0.0458686	0.179997	0.19002	0.202114	0.233613	0.0951584	0.289789	0.186874	0.0698498	0.0442147	0.0338512	0.281784	0.137629	0.144574	0.147514	0.052776	0.066437	0.102038	0.209432	0.13087
Brachyspira_hyodysenteriae	0.143313	0.0647868	0.256753	0.0744127	0.150105	0.156796	0.0245907	0.44338	0.0881743	0.236484	0.132778	0.14993	0.0925161	0.112184	0.223069	0.237632	0.261255	0.15451	0.179398	0.0987285	0.163621	0.26797	0.306456	0.217531	0.242894	0.0752997	0.0850098	0.145241	0.0271864	0.106468	0.180999	0.0790985	0.18295	0.0504241	0.256506	0.151989	0.0906789	0.04403	0.0316368	0.292088	0.348412	0.164545	0.113528	0.0766674	0.0647412	0.0709964	0.118741	0.107414
Brachyspira_pilosicoli	0.118691	0.0662607	0.0979176	0.0326068	0.125331	0.0875106	0.0470264	0.172196	0.054049	0.132938	0.0563318	0.0693236	0.0204881	0.0455706	0.115948	0.129233	0.0945226	0.0830453	0.0812059	0.0283799	0.0459152	0.188643	0.108818	0.0807935	0.0952336	0.0397189	0.073347	0.0536559	0.0276086	0.0720245	0.0556969	0.0666771	0.147611	0.0555188	0.189261	0.0996253	0.044427	0.0073409	0.0196451	0.133915	0.0868961	0.128449	0.0623367	0.00905298	0.0288126	0.0459804	0.0955152	0.0417349
Brachyspira_unclassified	0.764585	0.327078	0.102239	0.221816	0.439022	0.33592	0.418858	0.664399	0.937406	0.0655203	0.443171	0.353317	1.16589	0.409428	1.02082	0.102389	0.1248	0.20196	0	0.19784	0.214036	0.282464	0.293883	0.101856	0	0.749795	0.701146	0.626413	0.297287	0.456191	0	0.175668	0.265485	0.515011	0.039544	0.845088	0.314481	0.114977	0.227233	0	0.116212	0.207167	0.857318	0.163845	0.466945	0.19699	0.187142	0.436751
Leptospira_biflexa	0	0	0	0	0	0	0	0	0	0	0	0	0	0	0	0	0	0	0	0	0	0	0	0	0.00407228	0	0	0	0	0	0.000356628	0	0	0	0.00284603	0	0	0	0	0	0	0	0	0	0	0	0.00501481	0
Leptospira_borgpetersenii	0	0	0	0	0	0	0	0	0	0	0	0	0	0	0	0	0	0	0	0	0	0	0	0	0	0	0	0	0	0	0	0.000629312	0	0	0	0	0	0	0	0	0	0	0	0	0	0	0.00881842	0
Leptospira_interrogans	0	0	0	0	0	0	0	0.00404713	0	0.0102742	0	0	0	0	0	0	0	0	0.0128892	0	0	0	0	0.00651132	0.0111427	0	0	0	0	0	0.0128386	0.00446512	0	0	0.0135977	0.00182316	0	0	0	0	0	0.0179107	0	0	0	0	0.0312151	0
Leptospira_kirschneri	0	0	0	0	0	0	0	0	0	0	0	0	0	0	0	0	0	0	0	0	0	0	0	0	0	0	0	0	0	0	0.00209781	0.0019179	0	0	0	0	0	0	0	0	0	0	0	0	0	0	0.00337862	0
Leptospira_meyeri	0	0	0	0	0	0	0	0	0	0	0	0	0	0	0	0	0	0	0	0	0	0	0	0	0	0	0	0	0	0	0.0108457	0.00106384	0	0	0.00885431	0	0	0	0	0	0	0	0	0	0	0	0.00939215	0
Leptospira_noguchii	0	0	0	0	0	0	0	0	0	0	0	0	0	0	0	0	0	0	0	0	0	0	0	0	0	0	0	0	0	0	0	0.00446512	0	0	0.000948676	0	0	0	0	0	0	0	0	0	0	0	0	0
Borrelia_afzelii	0.152972	0.0601934	0.234297	0	0	0.0748195	0	0.064986	0	0.106071	0.173605	0.0587654	0	0.061947	0.0513996	0.577281	0.0446249	0	0.164244	0.0942475	0	0.218689	0	0.207321	0.0477611	0.0792414	0.060148	0.162533	0.0112636	0.103245	0.038348	0.0703031	0.175595	0.0963051	0.163188	0.0662123	0.0397231	0.0326416	0	0.129953	0.286067	0.124602	0	0	0.0476248	0.0254432	0.180257	0.203318
Borrelia_burgdorferi	0	0	0	0.0951765	0.0352212	0.0640138	0.114751	0.0406259	0	0.0768558	0.0442234	0	0.036108	0	0.0414998	0	0.0494814	0.119307	1.13627	0.261722	0	0.124339	0.377921	0.0899847	0.112084	0.116166	0.0481403	0	0.0531515	0.0490549	0.282575	0.0296975	0.120957	0.0752733	0.111991	0.188206	0	0.103788	0.0232452	0.0841451	0.404085	0.0714884	0.10964	0.112045	0.053251	0.0372735	0.0937303	0.190341
Borrelia_garinii	0	0.0511785	0.171501	0	0	0	0	0	0	0	0	0.119999	0	0	0.373283	0.837186	0.207889	0	0.204703	0	0	0.0536281	0	0.161233	0.137303	0.0398095	0	0	0	0	0.0549417	0.00732699	0	0	0.00823767	0.0304503	0.0423347	0	0	0	0.0988834	0	0.0493184	0	0	0	0.12945	0.104573
Borrelia_recurrentis	0	0	0	0	0	0	0	0	0	0	0	0	0	0	0	0	0	0	0	0	0	0	0	0	0	0	0	0	0	0	0.303134	0	0	0	0	0	0	0	0	0	0	0	0	0	0	0	0	0
Borrelia_unclassified	0	0	0	0	0.0603603	0	0	0.0264223	0.0512912	0	0	0	0	0	0	0	0	0	0	0	0.150027	0	0	0	0	0	0	0	0	0	0	0	0	0	0	0	0	0	0	0	0	0	0	0	0	0	0	0
Sphaerochaeta_unclassified	2.36504	0.256826	0.608449	0.525543	1.50007	1.21378	0.409352	1.55639	0.194734	0.447307	0.998008	1.08173	0.255256	3.31329	0.428146	0.717001	0.32181	1.01496	0.503131	1.28544	0.920671	0.711375	1.3209	0.53714	0.411861	0.157607	0.0575771	0.219439	0.271563	0.914939	1.3966	0.238854	0.24624	1.38768	0.0474022	2.19088	1.07769	0.0761022	0.151838	0.40151	0.583896	0.815394	0.262822	0.41126	0.199406	0.443083	1.00156	1.14413
Spirochaeta_thermophila	0	0.00698838	0	0	0	0	0	0	0	0	0	0	0	0	0	0	0	0	0	0	0	0	0.00190788	0	0	0	0	0	0.00253318	0	0.00375508	0.00515436	0	0	0.00488568	0.00303276	0	0.00221612	0	0	0	0	0	0	0	0	0.00607727	0
Treponema_denticola	0.00275981	0.00740596	0.0139455	0	0.00452702	0.0200752	0	0.0348775	0	0.00791068	0	0	0	0	0.00925623	0.0580042	0.0311653	0.0196938	0.0156894	0.00781449	0.0161957	0.0204459	0.0276528	0.0232326	0.0245138	0	0.00315083	0	0.00506636	0.00668247	0.00807657	0.00908007	0.0157435	0	0.0228473	0.0122012	0.0218202	0.0155282	0	0.0215178	0.0130407	0.0428965	0	0.00529034	0.00148976	0	0.025669	0.0276182
Treponema_pallidum	0	0	0	0	0	0	0	0	0	0	0	0	0	0	0	0	0	0	0	0	0	0	0	0	0	0	0	0	0	0	0.000545431	0.00146839	0	0	0	0	0	0	0	0	0	0	0	0	0	0	0.00172119	0
Treponema_primitia	0.0168545	0.019258	0.0254808	0.00970936	0.0313409	0.0164617	0.0137638	0.00420179	0	0.0162233	0	0.0154553	0	0.012836	0.00563956	0	0.0301107	0.0271751	0.038544	0.0159569	0.01493	0.0199924	0.027331	0.0344391	0.0223013	0.00753601	0.00763411	0	0.0111882	0	0.018167	0.0133954	0.00996446	0.00741701	0.0179774	0.0176707	0.0240541	0.0104188	0.00274539	0.0340621	0.00897801	0.0148197	0	0.0183181	0.0108087	0.00844178	0.0490219	0.0131756
Treponema_socranskii	0.0236752	0.0159173	0.0373819	0.00919916	0.0288701	0.014716	0.00900209	0.00456269	0	0.00397142	0	0.0142996	0	0.0551205	0.00612995	0.0160092	0.0426267	0.0533082	0.0561894	0.0553936	0.0439229	0.0220144	0.0311237	0.0656004	0.0132109	0	0	0	0.00952957	0.00328752	0.0290757	0.0130507	0	0	0.0118268	0.00413718	0.0230158	0.012358	0	0.0406239	0.0163008	0.0215513	0	0	0.00301122	0.019226	0.0220354	0.0079814
Treponema_succinifaciens	0	2.5769	8.82807	26.0917	8.84274	18.7865	0	0	0	0	0	0	0	5.63251	15.7574	5.77541	11.1938	8.99103	7.10089	13.983	11.549	12.8641	2.93462	19.6592	0	0	0	0	0	6.09031	15.5197	0	0	0	0	0	20.5734	15.0459	0	5.9256	5.73684	8.14558	0	0	0	8.60576	1.79904	1.74268
Treponema_vincentii	0	0	0	0	0	0	0	0	0	0	0	0	0	0	0	0	0.00224789	0	0.004015	0	0	0	0	0	0.00739103	0	0	0	0	0	0.00939819	0.00533417	0	0	0.00580274	0	0	0	0	0	0	0	0	0	0	0	0.00996588	0
Anaerobaculum_unclassified	0	0.000491275	0	0	0	0	0	0	0	0	0	0	0	0	0	0	0	0	0	0	0	0	0	0	0.00671766	0	0	0	0	0	0.00299987	0.00220259	0	0	0.000711507	0	0	0	0	0	0	0	0	0	0	0	0.00524855	0
Jonquetella_anthropi	0	0	0.0273258	0	0	0	0	0	0	0	0	0	0	0	0	0	0.00693795	0	0	0	0	0	0	0.0231883	0.00907445	0	0	0	0.00791618	0	0.00184607	0.00486967	0	0	0.0201594	0	0	0.00484777	0	0	0	0	0	0	0	0.00648234	0	0
Jonquetella_unclassified	0	0.00993603	0	0	0	0.00562106	0	0	0	0	0	0	0	0	0	0	0.00227565	0.0168584	0.0162659	0.00896207	0	0	0.00848202	0	0.00609239	0	0	0	0.00292522	0	0.0107828	0.0020078	0.00457069	0.00341096	0	0.0175479	0	0	0	0.0151753	0	0.00619921	0	0	0.0119339	0	0.0256053	0.0338078
Thermanaerovibrio_unclassified	0.00575617	0.0402354	0.0358361	0.0361937	0.0529479	0.0357863	0.0600603	0.0149769	0.0275779	0.0275587	0.0188848	0.051694	0.0327058	0.0308283	0.0199223	0	0.0254761	0.0759057	0.0468828	0.0505118	0.0179536	0.0555177	0.0480188	0.0401531	0.0446989	0.064562	0.0179331	0.0234359	0.0443155	0.0112162	0.0368585	0.0364401	0.0195437	0.0144276	0.0432438	0.07205	0.0669709	0.0454305	0.0149961	0.06601	0.0287146	0.0477391	0.00659573	0.0216847	0.0174017	0.0292442	0.0717798	0.0835061
Candidatus_Phytoplasma_australiense	0.115261	0.0502697	0.167279	0.0748147	0.13669	0.0844382	0.0899166	0.244555	0.042849	0.10189	0.0834836	0.0648574	0.0468031	0.0772159	0.182213	0.276541	0.221043	0.127728	0.118968	0.157966	0.11862	0.142914	0.217429	0.167124	0.124269	0.0389939	0.0688794	0.121046	0.0273975	0.108853	0.0655566	0.0403659	0.129468	0.0404815	0.119391	0.0921574	0.0465036	0.0493241	0.0332167	0.150155	0.19408	0.170933	0.0677361	0.0415023	0.0587822	0.0514904	0.0838069	0.0736063
Candidatus_Phytoplasma_mali	0	0	0	0	0	0	0	0	0	0	0	0	0	0	0	0	0	0	0	0	0	0	0	0	0	0	0	0	0	0	0.353565	0	0	0	0.451001	0	0	0	0	0	0	0	0	0	0	0	0	0
Candidatus_Phytoplasma_unclassified	0.390986	0.0759879	0.216928	0.237246	0.670762	0.090967	0.335215	0	3.10535	0.653805	0.710202	0.580034	0.238414	0.190707	0.166949	0.522873	0.0123218	0.260016	0.467428	0.21498	0.331461	0.840268	0	0	0.259071	0	0.370074	0	0.0317703	0.188033	0.158091	0.0364401	0.801955	0.204338	0.820716	0.0138315	0	0.293174	0.181895	0.41692	0.737551	0.388318	0	0.178627	0.196744	0.353052	0.47849	0.682147
Mesoplasma_florum	0.0961596	0.053856	0.135582	0.0408937	0.147186	0.0721835	0.0740848	0.232955	0.0602775	0.145624	0.0597892	0.0790591	0.022988	0.0672121	0.108439	0.242179	0.138426	0.113637	0.109311	0.0806222	0.139691	0.213643	0.176307	0.139595	0.0935342	0.0346898	0.0706037	0.109043	0.0287093	0.149378	0.074787	0.0385828	0.114075	0.0356336	0.143535	0.0840057	0.0581453	0.0635904	0.0395751	0.105177	0.14257	0.106589	0.0590782	0.0589858	0.0416816	0.0789667	0.119973	0.069136
Spiroplasma_melliferum	0.0548216	0.031024	0.0932635	0.0461349	0.0642572	0.0580611	0.0305863	0.115665	0.0511974	0.124577	0.0687015	0.0740836	0.0162777	0.101127	0.154322	0.16566	0.148666	0.0887331	0.0633546	0.0225691	0.018352	0.162169	0.131345	0.100195	0.114954	0.0194517	0.0435003	0.0345134	0.0188933	0.100409	0.0569766	0.0460896	0.10087	0.0179837	0.144657	0.0868807	0.0464722	0.0402749	0	0.0716479	0.158244	0.0522211	0.0268709	0.0307235	0.0265304	0.035152	0.0831694	0.066747
Spiroplasma_unclassified	0.0647964	0.0390563	0	0.0691869	0.871792	0.0708394	0.289979	0.162143	0.565967	0.198056	0.194918	0	0.0940386	0.491055	0	0.339765	0	0.147063	0.22241	0.383129	0.122745	0.0643613	0.185432	0.152307	0.0192231	0.148485	0.00735194	0.712803	0.0350121	0.356062	0.0219851	0	0	0.075549	0	0.174761	0.152018	0.0374278	0.166459	0.369546	0.426907	0.290333	0.288512	0.122668	0.17053	0.137941	0.0283677	0.265051
Mycoplasma_agalactiae	0.0202649	0.0104027	0.0517097	0.0120285	0.0975549	0.0275642	0.00300649	0.0864075	0.00288912	0.0494578	0	0.0264249	0.0172175	0.0142522	0.0449938	0.0878415	0.0701565	0.0472446	0.0423531	0.0319501	0.0301882	0.0707105	0.0324569	0.0706722	0.0524106	0.00943889	0.017745	0.015537	0.00898675	0.0324239	0.0232857	0.0238389	0.0446037	0.00391897	0.0329191	0.0364632	0.0237867	0.00686382	0	0.031713	0.0794227	0.0427248	0.0118849	0.0227032	0.0189707	0.00634975	0.0587753	0.0235822
Mycoplasma_bovis	0.0314618	0.0180543	0.0549176	0	0.04663	0.0178582	0	0.0367593	0	0.0479303	0	0.0219195	0.00546976	0.0118193	0.0327033	0.0652199	0.0247268	0.0284049	0.0474182	0.017068	0.00515637	0.0711451	0.0563399	0.0538402	0.0415565	0	0.0106282	0	0.0156967	0.0226044	0.0323483	0.0211569	0.0510832	0.00751862	0.0481137	0.0316424	0.018076	0.011096	0	0.045792	0.0491032	0.0447339	0	0.0174977	0.0171798	0.0205225	0.0947502	0.0106057
Mycoplasma_canis	0.083839	0.0467448	0.183967	0.12817	0.218325	0.152292	0.0621979	0.316552	0.11579	0.152007	0.076154	0.115474	0.0382696	0.0837701	0.246639	0.367677	0.237417	0.116216	0.164471	0.117727	0.164957	0.254289	0.202787	0.160413	0.143957	0.0512872	0.102567	0.134662	0.0409078	0.138355	0.218403	0.0568029	0.155141	0.04591	0.214733	0.120118	0.0957603	0.0432913	0.0516574	0.14945	0.150344	0.150584	0.1072	0.06231	0.0611594	0.0657516	0.158137	0.101586
Mycoplasma_capricolum	0.231233	0.139018	0.166116	0.155628	0.439586	0.492227	0.0792288	0.57312	0.359432	0.389456	0.115491	0.215434	0.105373	0.159352	1.26311	0.416818	0.405925	0.324649	0.197703	0.22928	0.321922	0.24641	0.144033	0.193524	0.0820548	0.0626742	0.123635	0.342904	0.0836099	0.302065	0.118484	0.0281093	0.183458	0.098671	0.158318	0.213292	0.177126	0.131197	0.0721831	0.56872	0.377728	0.17739	0.162957	0.122526	0.0911765	0.146074	0.124627	0.204241
Mycoplasma_fermentans	0.0790882	0.0273026	0.0684642	0.00759124	0.0566624	0.0481456	0	0.203645	0.0349133	0.0881108	0.0172099	0.0613315	0	0.0266162	0.103749	0.132969	0.106955	0.0589277	0.0636429	0.0451018	0.0655563	0.112245	0.0884751	0.0943699	0.0956825	0.0255228	0.0347846	0.0703077	0.0126207	0.0931678	0.0743045	0.0421189	0.124897	0.0249363	0.0953103	0.048454	0.0325966	0.0165747	0.0133903	0.0970496	0.16341	0.06826	0.00743003	0.0295778	0.0278458	0.0280067	0.101869	0.0493001
Mycoplasma_gallisepticum	0.00461282	0.00232127	0.00899226	0	0.00203965	0.00876327	0	0.0213956	0	0.00538633	0	0	0	0	0.0131181	0.0223896	0.0167621	0.00438969	0.00992425	0.0170862	0	0.0314815	0.0351004	0.0327116	0.0188864	0.00128369	0.00456165	0	0.00116104	0.0254621	0.0195516	0.00660777	0.0119083	0	0.0185941	0.0142522	0.0106033	0.00309334	0	0.00588844	0.0145203	0.0153864	0	0	0	0.00265187	0.0147257	0.00182794
Mycoplasma_genitalium	0.0124586	0.00203879	0.0280239	0	0.0154217	0.00300256	0	0.0210605	0	0.0319	0	0.0025465	0	0	0	0.0266587	0.0109065	0.00379187	0.0098419	0	0	0.0139078	0.0234692	0.0190024	0.0224296	0	0.00368381	0	0.00518698	0	0.0106569	0.00809115	0.0141674	0	0.0281124	0.00709981	0	0	0	0.0181821	0.00403759	0.0150601	0	0.0124337	0.00174334	0	0.0268377	0
Mycoplasma_hominis	0.118908	0.038737	0.127471	0.0620441	0.102911	0.123855	0.0449062	0.210554	0.0237508	0.126571	0.0848973	0.100097	0.0670845	0.0655963	0.181906	0.279951	0.153967	0.105062	0.211148	0.068017	0.127339	0.195427	0.240301	0.158088	0.133167	0.0350221	0.0645215	0.0282275	0.0276689	0.105867	0.0786679	0.041175	0.206802	0.0203641	0.147582	0.0875819	0.0609613	0.0341344	0.0252783	0.176215	0.164212	0.120876	0.123146	0.0452083	0.0559453	0.0564995	0.125434	0.11925
Mycoplasma_hyopneumoniae	0.0771564	0.0445709	0.117581	0.0422388	0.137303	0.0938997	0.0513536	0.296575	0.0840283	0.117824	0.0587136	0.0548673	0.0472355	0.0603856	0.153157	0.355751	0.15949	0.112953	0.124836	0.0942657	0.0980414	0.180329	0.23352	0.19142	0.101102	0.0438418	0.0706507	0.0639506	0.0479193	0.0887414	0.0878773	0.0572374	0.140291	0.047913	0.184423	0.105656	0.0519154	0.0328417	0.0330613	0.162887	0.215823	0.116308	0.0735762	0.0589575	0.050842	0.0379364	0.104674	0.0923924
Mycoplasma_hyorhinis	0.0970467	0.0318346	0.109835	0.0757269	0.113739	0.0903385	0.0394493	0.134045	0.0390781	0.102614	0.0201909	0.0866202	0.0254692	0.0804476	0.147425	0.249928	0.114532	0.0969318	0.106058	0.0529527	0.076455	0.130102	0.217383	0.135143	0.119363	0.027471	0.08606	0.0953567	0.0261159	0.0889993	0.0743884	0.0404108	0.145054	0.0364755	0.103058	0.0798335	0.0363408	0.0157283	0.00524474	0.101262	0.173291	0.100664	0.0423764	0.034373	0.0519356	0.0458184	0.12231	0.0818048
Mycoplasma_leachii	0.0863229	0.0830377	0.127271	0.039796	0.117155	0.0538889	0.122293	0.0988582	0.196066	0	0.0680868	0.145444	0.0482881	0.127652	0.0587249	0.823451	0.444389	0.0670922	0.0923656	0.0603847	0.183754	0.074452	0.366658	0.0469081	0.0902956	0.0692437	0.0182623	0.220672	0.0149277	0.0952305	0.0922617	0.0433476	0.162584	0.152912	0.148499	0.183806	0.0859436	0.0718085	0.0441205	0.280358	0.359547	0.247058	0.163791	0.164411	0.112429	0.0760496	0.149106	0
Mycoplasma_mycoides	0.11126	0.0428637	0.191813	0.0591993	0.153222	0.0941965	0.1013	0.387983	0.0833717	0.149451	0.105949	0.138432	0.072028	0.181538	0.224908	0.228374	0.167593	0.273988	0.0463681	0.197366	0.0598608	0.213473	0.455432	0.300384	0.130585	0.0789393	0.0830346	0.110158	0.0546593	0.223487	0.175587	0.0326643	0.077982	0.0398284	0.227413	0.203879	0.129914	0.0725164	0.0285676	0.377987	0.481527	0.223824	0.104461	0.104802	0.0701614	0.0987968	0.225242	0.0744569
Mycoplasma_pneumoniae	0	0	0	0	0	0	0	0.00448535	0	0	0	0	0	0	0	0	0	0	0.00411795	0	0	0	0	0	0.00202011	0	0	0	0	0	0.00451029	0.00334135	0	0	0.00472757	0	0	0	0	0	0	0	0	0	0	0	0.00709724	0
Mycoplasma_putrefaciens	0.037632	0.0388107	0.071722	0.00720472	0.100523	0.083094	0.0188905	0.0919755	0	0.0529147	0.0112018	0.0658564	0.0292097	0.0566456	0.130782	0.162806	0.171284	0.0596792	0.0430737	0.0916791	0.0324617	0.102381	0.131437	0.135497	0.0720345	0.0205541	0.0300034	0.0405147	0.0108716	0.0542548	0.0807867	0.0282291	0.117927	0.0177515	0.100196	0.124869	0.0514749	0.0365044	0	0.0665425	0.0876233	0.0537151	0.0403457	0.0404272	0.0427435	0.0257378	0.0709936	0.0380067
Mycoplasma_suis	0	0.00836395	0.0174693	0	0	0.00792535	0	0.0337948	0	0.0161912	0	0.00564148	0	0	0	0.0268907	0.0345787	0.00903558	0.017316	0.00273234	0	0.00967498	0.035721	0.0146173	0.0258125	0	0.00147352	0	0.00271412	0	0.0144539	0.0104286	0.0137646	0.0013789	0.0238592	0.00976444	0.013262	0.00624823	0	0.0030695	0	0.0124499	0	0	0	0	0.0160856	0
Mycoplasma_synoviae	0.0608341	0.0216406	0.0618821	0.0294373	0.0633783	0.0632806	0.0227312	0.136262	0.0485334	0.0656811	0.0335287	0.0160038	0	0	0.121741	0.175358	0.100323	0.0684586	0.0837796	0.0402382	0.0473215	0.112283	0.117967	0.116872	0.0927646	0.00462128	0.0302543	0.00616735	0.0230248	0.0878175	0.0650321	0.0318701	0.0830955	0.0284198	0.0787559	0.0383215	0.0418155	0.0245928	0.0167443	0.074827	0.149792	0.102261	0.0390391	0.01597	0.034629	0.0255316	0.0785796	0.0454632
Ureaplasma_parvum	0.128233	0.0381352	0.251567	0.0923781	0.179738	0.118915	0.0906987	0.787746	0.117047	0.159484	0.137756	0.116277	0.0778925	0.08889	0.156528	0.753822	0.244382	0.16978	0.119091	0.104193	0.163246	0.212283	0.28763	0.20143	0.0630402	0.0567089	0.107504	0.110253	0.064777	0.195425	0.177999	0.0325594	0.462113	0.0805421	0.232568	0.103535	0.0708409	0.064483	0.0402485	0.184155	0.214293	0.159806	0.083824	0.0770493	0.0645352	0.0832834	0.177027	0.121712
Ureaplasma_urealyticum	0.0811384	0.0825096	0.200988	0.108133	0.069033	0.135796	0.0901252	0.287758	0.0478956	0.176865	0.0398287	0.0953175	0.0221046	0.107046	0.160758	0.425867	0.292226	0.0885282	0.14211	0.073172	0.0845645	0.217366	0.34905	0.19751	0.197329	0.0287848	0.0754475	0.156627	0.0570719	0.0940917	0.159601	0.126836	0.183686	0.034516	0.23709	0.0838129	0.0440022	0.0427373	0.0443795	0.142497	0.15383	0.193	0.118392	0.0924394	0.082238	0.0750036	0.232743	0.0656611
Thermodesulfatator_unclassified	0.200658	0.0438954	0.0954077	0.0635438	0.192937	0.0906004	0.116402	0.121981	0.0493213	0.0412095	0.0595433	0.0823695	0.0596223	0.109206	0.053821	0.117052	0.0469838	0.183598	0.0362174	0.146854	0.0635172	0.112887	0.0609602	0.119574	0.0830809	0.0352184	0.0982871	0.0726324	0.0529102	0.136013	0.0618015	0.024693	0.0817996	0.0845627	0.0372355	0.10115	0.129804	0.0410598	0.0762623	0.0625176	0.272475	0.11897	0.0781885	0.0947592	0.0579422	0.0385552	0.0541855	0.16218
Thermodesulfobacterium_unclassified	0.0947797	0.0244655	0.0327943	0.0140384	0.082299	0	0	0	0.0492463	0.0181367	0.0633234	0.0556509	0.282454	0.0957528	0.212771	0.120533	0.015985	0.147524	0.146846	0.0357026	0.0428917	0.0159864	0.368313	0.0990872	0.0448752	0.0127916	0.218881	0	0.0118366	0.118866	0.0121044	0	0.00907134	0.0186079	0	0.0383741	0.0881146	0.0782722	0.042968	0.0765027	0.433026	0.157865	0	0.068449	0.0768812	0.0396307	0.0464508	0.0898586
Fervidobacterium_unclassified	0.0331966	0.0183614	0.0699768	0.00485468	0.0291686	0.031649	0.00912374	0.0729514	0.0174097	0.0663243	0	0	0	0.0429199	0.0545259	0.140881	0.0486489	0.0942672	0.0813707	0.038271	0.0462433	0.0581632	0.0131713	0.038625	0.048178	0.0131842	0.014312	0.0178141	0.0116858	0.087796	0.0266002	0.0122566	0.0613278	0.0321501	0.019353	0.0580958	0.0184536	0.00398594	0	0.106086	0.104651	0.0579738	0.019252	0.0884646	0.0460399	0.0238668	0.0469182	0.0498973
Mesotoga_unclassified	0	0	0	0	0	0	0	0	0	0	0	0	0	0	0	0	0	0	0	0	0	0	0	0	0	0	0	0	0	0	0.00104891	0.0011837	0	0	0.00439553	0	0	0	0	0	0	0	0	0	0	0	0.00546105	0
Thermosipho_africanus	0.0361535	0.0112993	0.0253977	0.0149042	0.0278089	0.03933	0.0330193	0.0830306	0	0.0224136	0	0.0308714	0.00308262	0.0217686	0.0604413	0.0877487	0.0622473	0.0459465	0.0495595	0.049765	0.0322742	0.0432728	0.0404333	0.0521127	0.0542062	0	0.0168201	0	0.0117763	0	0.044117	0.0206324	0.0531496	0.00746056	0.0565727	0.026506	0.0334933	0.0111268	0.00372959	0.0533091	0.0660059	0.0312021	0.00735132	0.00229153	0.0183843	0.0168099	0.0547167	0.0288489
Thermosipho_unclassified	0.0346159	0.0162243	0.064126	0.0506031	0.0734605	0.0332201	0.0827393	0.115562	0.128303	0.0837696	0.0721281	0	0.0462017	0.0775609	0.186381	0.230926	0	0.0787752	0.0552629	0.0910415	0.0841192	0.110582	0.125736	0.0730198	0.0478252	0.0471794	0.0589253	0.0670106	0.0578861	0.0922653	0.0218592	0.0279295	0.127419	0.0475937	0.0619327	0.05331	0.044663	0.0156821	0.0112017	0.0731513	0.202607	0.124688	0.0533797	0.0553505	0.0787037	0.0911211	0.0888854	0.0891347
Thermotoga_maritima	0	0	0	0	0	0	0	0	0	0	0	0	0	0	0	0	0	0	0.00280021	0	0	0	0	0.00181608	0	0	0	0	0	0	0.00425856	0.00214266	0	0	0.000901242	0	0	0	0	0	0	0.0103893	0	0	0	0	0.0038886	0
Thermotoga_unclassified	0	0.0012896	0.00970699	0	0	0	0	0	0	0	0	0	0	0	0	0	0	0	0	0	0	0	0	0	0.00200408	0	0	0	0	0	0.00138455	0.001828	0	0	0.00597666	0.000999233	0	0	0	0	0	0	0	0	0	0	0.00886092	0
Methylacidiphilum_unclassified	0	0.00601812	0.0055516	0	0	0	0	0	0	0	0	0.00981382	0	0	0	0	0.0216741	0	0.00685638	0	0	0.00789871	0	0	0.00950733	0	0	0	0.00319663	0	0.00291596	0	0.00476333	0	0.007289	0	0.0132778	0	0	0.0211263	0	0	0	0	0.0143588	0	0.00699099	0
