# Supplementary material for: Social networks predict gut microbiome composition in wild baboons
Source: eLife. 2015 Mar 16;4:e05224. doi: 10.7554/eLife.05224 (PMC4379495; doi:10.7554/eLife.05224)
Supplement: Supplementary file 3. — Table listing species richness and alpha diversity for each sample based on taxonomic profiling using MetaPhlAn 2.0 and de novo contig assembly. DOI: http://dx.doi.org/10.7554/eLife.05224.016 [file elife05224s003.xlsx]

## Sheet: Sheet1
Subject ID	Count of species (MetaPhlAn 2.0)	Simpson's reciprocal index (MetaPhlAn 2.0)	Shannon's index (MetaPhlAn 2.0)	Count of species (de novo)	Simpson's reciprocal index (de novo)	Shannon's index (de novo)
F01	751	25.5785	3.92744	1313	14.113	5.568
F02	602	15.3087	3.70695	1377	6.977	4.22
F03	602	28.9614	4.17924	1361	6.808	4.369
F04	337	9.66561	3.2224	1296	2.736	2.845
F05	438	28.8379	4.15627	1341	7.315	4.944
F06	583	17.5818	3.89644	1371	4.301	4.13
F07	310	25.6564	3.88452	1286	20.639	6.251
F08	464	25.2432	4.05459	1327	10.926	5.12
F09	259	25.7866	3.7445	1254	12.47	5.647
F10	434	22.1025	3.89985	1347	10.322	4.981
F11	266	19.7396	3.64595	1275	11.481	5.451
F12	429	20.6417	3.85258	1336	10.207	4.821
F13	305	15.4375	3.62262	1282	13.694	5.057
F14	330	30.2047	4.04716	1289	15.159	6.022
F15	365	18.3365	3.74727	1313	3.184	3.72
F16	389	26.7699	4.15521	1325	8.504	5.021
F17	568	20.9906	4.01546	1355	4.035	4.225
F18	504	30.2237	4.18	1328	6.868	4.762
F19	597	23.2686	4.10486	1355	7.234	4.485
F20	486	25.6978	4.10418	1327	4.72	4.288
F21	410	24.5073	3.92524	1316	6.552	4.396
F22	519	24.5008	4.13285	1333	4.432	3.928
F23	545	32.7108	4.3536	1351	7.245	4.904
F24	501	16.6918	3.92224	1328	3.079	3.147
F25	685	18.2528	4.07512	1359	6.76	4.279
F26	406	17.0837	3.67127	1318	8.339	4.694
F27	487	12.8217	3.61583	1337	8.997	4.752
F28	234	13.611	3.36929	1250	6.992	4.858
F29	647	18.9453	3.88764	1361	11.838	5.2
F30	299	29.14	3.94032	1277	9.731	4.821
F31	1042	20.4172	4.09873	1408	5.508	4.442
M01	996	24.3617	4.13929	1383	15.727	6.285
M02	567	18.1471	3.83592	1402	12.754	5.083
M03	431	14.2772	3.51642	1381	10.674	5.048
M04	977	30.4596	4.31634	1347	14.274	5.259
M05	595	30.2958	4.16667	1415	15.492	5.368
M06	515	14.5015	3.71401	1347	4.147	3.34
M07	447	14.0238	3.42438	1332	4.327	3.761
M08	309	4.34821	2.59552	1272	2.729	2.942
M09	484	28.6721	4.24066	1314	11.739	5.229
M10	409	25.2899	4.09171	1326	9.794	5.302
M11	513	32.5268	4.30775	1331	8.695	4.811
M12	293	12.9738	3.45474	1267	6.119	4.1
M13	413	9.96946	3.47463	1311	5.502	4.279
M14	440	12.1082	3.6399	1356	7.005	4.621
M15	407	23.1676	3.80799	1319	9.529	4.725
M16	1050	28.45	4.39391	1406	16.437	5.77
M17	448	26.5294	4.09273	1326	11.503	5.126
