# Supplementary material for: Social networks predict gut microbiome composition in wild baboons
Source: eLife. 2015 Mar 16;4:e05224. doi: 10.7554/eLife.05224 (PMC4379495; doi:10.7554/eLife.05224)
Supplement: Supplementary file 4. — Table listing species proportional abundance for each sample based on de novo contig assembly. DOI: http://dx.doi.org/10.7554/eLife.05224.017 [file elife05224s004.xlsx]

## Sheet: Figure 1 - source data 2
Species	F01	F02	F03	F04	F05	F06	F07	F08	F09	F10	F11	F12	F13	F14	F15	F16	F17	F18	F19	F20	F21	F22	F23	F24	F25	F26	F27	F28	F29	F30	F31	M01	M02	M03	M04	M05	M06	M07	M08	M09	M10	M11	M12	M13	M14	M15	M16	M17
Acaryochloris_marina	1.93e-05	5.79e-06	2.09e-05	2e-05	8.42e-05	7.36e-05	4.31e-05	4.12e-05	0.000165932	3.76e-05	2.1e-05	3.57e-05	8.9e-05	2.28e-05	7.08e-05	0.000150292	9.72e-05	1.86e-05	7.73e-05	2.28e-05	1.59e-05	1.28e-05	9.77e-05	3.96e-05	3.44e-05	2.6e-05	4.27e-05	1.26e-05	3.96e-05	4.09e-05	1.6e-05	2.34e-05	2.48e-05	6.5e-05	3.81e-05	3.49e-05	1.23e-05	1.32e-05	1.71e-05	5.2e-05	0.000125515	3.6e-05	2.08e-05	6.2e-05	2.1e-05	5.64e-06	9.37e-05	2.26e-05
Acetobacterium_woodii	8.88e-05	4.82e-05	0.000106052	6.9e-05	4.56e-05	7.65e-05	0.000121777	0.00011848	0.000132746	0.000118673	0.000105464	9.22e-05	8.29e-05	8.33e-05	0.00010369	0.000262466	0.00020504	0.000160171	0.00021139	5.66e-05	5.95e-05	0.000154273	0.000124597	6.74e-05	6.53e-05	7.06e-05	6.64e-05	0.000101368	6.55e-05	0.000123776	7.4e-05	0.000179008	0.000168017	0.000137725	9.81e-05	0.000249796	8.14e-05	0.000107552	4.82e-05	8.19e-05	0.00018719	0.00015318	7.72e-05	0.000134674	6.71e-05	0.000116812	0.000183372	7.84e-05
Acetobacter_pasteurianus	0.000112816	1.43e-05	5.34e-05	2.47e-05	6.5e-05	2e-05	9.11e-05	6.6e-05	5.6e-05	2.52e-05	7.23e-05	2.5e-05	7.57e-05	2.72e-05	5.54e-05	2.5e-05	9.33e-05	3.66e-05	5.35e-05	6.64e-05	4.32e-05	2.74e-05	6.6e-05	2.32e-05	3.45e-05	4.89e-05	6.98e-05	5.1e-05	8.79e-05	2.9e-05	2.85e-05	3.98e-05	4.68e-05	3.99e-05	2.4e-05	8.61e-05	3.08e-05	1.46e-05	3.1e-05	7.85e-06	5.57e-05	2.89e-05	7.23e-06	4.72e-05	3.34e-05	2.11e-05	5.33e-05	3.09e-05
Acetohalobium_arabaticum	8.34e-05	3.76e-05	4.3e-05	2.79e-05	7.14e-05	3.32e-05	0.000254939	7.7e-05	5.23e-05	4.89e-05	0.000115403	3.64e-05	2.59e-05	0.000187633	2.77e-05	0.000169351	0.000126929	4.98e-05	8.3e-05	6.44e-05	2.47e-05	5.43e-05	8.15e-05	5.3e-05	3.48e-05	2.17e-05	1.87e-05	9.16e-05	1.53e-05	6.36e-05	6.66e-05	2.64e-05	9.12e-05	5.79e-05	6.25e-05	0.000130321	3.49e-05	3.4e-05	1.82e-05	3.6e-05	0.000154729	5.55e-05	5.58e-05	1.87e-05	4.15e-05	3.5e-05	0.000117509	7.48e-05
Acholeplasma_laidlawii	0.000197822	6.73e-05	0.000112992	0.00018409	0.00023832	0.000200183	0.000145538	0.000314479	0.000431008	0.00012155	0.000125342	0.000118113	5.91e-05	0.000341937	0.000285531	0.000429639	0.000475725	0.000189166	0.000252455	0.000253702	0.000339074	0.000126905	0.000411028	0.000218505	0.000247775	9.87e-05	0.00011655	0.000187357	0.000287123	0.000138579	0.00010858	0.000114377	0.000188443	8.96e-05	0.00020021	0.000291146	7.55e-05	6.91e-05	4.79e-05	0.000156633	0.00027808	0.000133435	9.75e-05	7.89e-05	9.54e-05	8.35e-05	0.000262319	0.000126636
Achromobacter_xylosoxidans	0.00019561	0.000116995	9.08e-05	0.000118791	0.000158325	0.000164391	0.000252959	0.000203972	0.00023106	0.000143127	0.000308108	9.31e-05	7.86e-05	0.000224666	8.95e-05	8.98e-05	8.79e-05	0.000140575	8.01e-05	8.82e-05	9.06e-05	0.000120823	0.00013982	3e-05	9.14e-05	0.000147221	7.58e-05	0.000164986	0.000132483	5.98e-05	9.68e-05	0.000130577	9.27e-05	0.0001418	0.000182073	0.000206412	5.93e-05	8.05e-05	9.07e-05	0.000158667	0.000102251	0.000105584	0.000120332	7.25e-05	0.000106167	0.000178421	0.000195827	0.00014208
Acidaminococcus_fermentans	0.000685426	0.000277781	0.00189657	0.000156299	0.000764958	0.000245921	0.000905901	0.00117655	0.00129759	0.000343073	0.000827144	0.000306952	0.00297556	0.000648076	0.000271378	0.000370284	0.000308702	0.00033114	0.00042122	0.000278066	0.00101928	0.000277123	0.000730717	0.000133843	0.000337536	0.00034284	0.00136168	0.00301448	0.00211	0.000322825	0.00127254	0.00159556	0.000328572	0.00143719	0.000437186	0.00113391	0.000177552	0.000597785	0.000258648	0.000396087	0.000451744	0.00158127	0.000338724	0.00028898	0.000283527	0.000419986	0.000935857	0.000385136
Acidaminococcus_intestini	0.000142837	0.000105482	0.000701265	8.23e-05	0.000141659	0.000121123	0.000163359	0.00139921	0.000155976	0.000530552	0.000258413	7.12e-05	0.00248189	0.000166031	8.31e-05	0.000132867	0.000128799	0.000177968	8.51e-05	6.73e-05	0.000922725	8.62e-05	0.000748985	6.25e-05	0.000106411	0.0147673	0.00113043	0.00031529	0.00171626	7.09e-05	0.000878426	0.00104495	0.000147199	0.00158533	0.000124709	0.000513997	5.33e-05	0.000189337	7.37e-05	0.000113624	0.000114153	0.000636414	8.1e-05	0.000129353	6.9e-05	0.000108103	0.000303837	0.00016275
Acidianus_hospitalis	0	0	1.08e-06	0	0	0	0	0	0	4.79e-07	0	2.14e-06	0	0	0	3.27e-06	0	0	0	0	0	0	4.68e-07	0	0	0	1.76e-07	0	0	0	2.82e-07	0	8.84e-07	0	2.81e-07	0	0	3.82e-07	0	0	0	0	0	0	7.44e-07	0	1.26e-07	0
Acidilobus_saccharovorans	0	0	0	0	0	3.8e-07	1.98e-06	0	0	0	9.94e-06	0	0	1.48e-05	0	0	0	0	0	0	2.06e-06	0	0	0	0	0	0	0	0	0	0	1.48e-06	4.03e-06	0	5.06e-06	0	0	0	0	0	0	8.73e-06	0	0	1.67e-05	0	2.52e-07	0
Acidimicrobium_ferrooxidans	9.76e-05	2.18e-05	4.24e-05	2.81e-05	0.00011666	6.96e-05	0.000269295	8.49e-05	0.000264247	5.08e-05	0.000235223	3.21e-05	1.51e-05	0.000407362	5.23e-05	5.45e-05	5.13e-05	7.44e-05	4.16e-05	5.17e-05	5.39e-05	8.29e-05	8.81e-05	4.49e-05	5.43e-05	8.96e-05	6.51e-05	8.04e-05	9.64e-05	5.76e-05	0.000178267	5.85e-05	6.09e-05	4.34e-05	8.53e-05	0.000262676	3.65e-05	3.96e-05	1.96e-05	0.000113624	0.00012281	0.000138423	2.83e-05	2.88e-05	0.000151313	6.69e-05	0.00012229	5.73e-05
Acidiphilium_cryptum	1.04e-05	7.79e-06	8.35e-06	0	1e-05	1.33e-06	2.43e-05	2.2e-06	1.12e-05	2.64e-06	2.54e-05	8.81e-06	0	3.7e-06	5.54e-06	4.36e-06	1.39e-05	2.2e-06	1.98e-05	4.03e-06	2.06e-06	2.43e-06	8.67e-06	5.34e-06	2.69e-06	7.73e-06	1.23e-06	1.54e-05	1.5e-06	3.15e-06	3.87e-06	2.46e-06	2.55e-06	2.72e-06	1.18e-05	1.39e-05	1.16e-05	7.35e-06	0	6.39e-06	1.3e-05	1.58e-05	5.21e-06	2.94e-06	1.49e-06	1.54e-06	1.75e-05	1.12e-05
Acidiphilium_multivorum	1.26e-05	4.03e-06	4.45e-06	2.3e-06	1.81e-05	9.19e-06	6.78e-05	1.46e-05	4.98e-05	5.27e-06	3.53e-05	1e-05	5.47e-06	8.95e-05	1.54e-06	0	1.25e-06	3.2e-06	6.93e-07	2.82e-06	6.38e-06	6.49e-06	7.03e-06	8.22e-07	6.93e-06	7.09e-06	1.76e-06	4.19e-06	1.98e-05	1.01e-05	2.98e-05	8.29e-06	9.82e-06	1.01e-05	1e-05	2.02e-05	9.28e-07	4.77e-06	0	8.72e-06	1.62e-06	1.66e-05	5.5e-06	2.02e-06	2.15e-05	8.2e-06	5.47e-06	2.14e-06
Acidithiobacillus_caldus	7.87e-05	2.61e-05	5.01e-05	2.2e-05	4.11e-05	3.6e-05	9.55e-05	3.79e-05	1.91e-05	2.83e-05	8.34e-05	5.43e-05	3.14e-05	7.84e-05	4.37e-05	2.94e-05	5.17e-05	4.28e-05	7.26e-05	5.8e-05	4.26e-05	2.98e-05	5.55e-05	2.9e-05	1.7e-05	4.68e-05	3.57e-05	4.61e-05	4.11e-05	4.69e-05	5.34e-05	3.09e-05	2.27e-05	2.49e-05	3.67e-05	8.73e-05	2.51e-05	0.000204892	2.61e-05	6.71e-05	4.6e-05	5.57e-05	3.5e-05	5.03e-05	2.9e-05	3.01e-05	9.36e-05	3.11e-05
Acidithiobacillus_ferrivorans	2.65e-05	3.1e-05	1.37e-05	2.11e-05	2.03e-05	2.32e-05	6.19e-05	8.8e-06	4.98e-05	3.86e-05	6.57e-05	2.64e-05	1.15e-05	5.74e-05	9.54e-06	9.26e-06	4.38e-05	2.08e-05	1.32e-05	3.04e-05	1.71e-05	2.64e-05	3.04e-05	1.42e-05	1.54e-05	1.25e-05	9.6e-06	3.29e-05	1.54e-05	2.83e-05	2.14e-05	1.94e-05	3.24e-05	2.1e-05	5.41e-05	6.91e-05	9.87e-06	1.23e-05	7.85e-06	4.91e-05	2.27e-05	2.41e-05	3.33e-05	1.58e-05	3.42e-05	1.9e-05	5.34e-05	4.75e-05
Acidithiobacillus_ferrooxidans	1.49e-05	4.05e-05	1.85e-05	1.85e-05	6.08e-05	1.54e-05	8.42e-05	1.26e-05	3.44e-05	3.72e-05	6.79e-05	1.55e-05	1.88e-05	2.16e-05	3.23e-05	1.63e-05	2.04e-05	2.84e-05	1.28e-05	2.3e-05	2.78e-05	1.97e-05	4.31e-05	1e-05	1.73e-05	2.58e-05	1.09e-05	2.1e-05	1.25e-05	1.07e-05	2.45e-05	3.74e-05	2.03e-05	1.99e-05	4.03e-05	7.47e-05	1.37e-05	1.62e-05	9.18e-06	6.39e-05	3.46e-05	3.53e-05	3.38e-05	2.2e-05	2.07e-05	3.13e-05	4.35e-05	3.06e-05
Acidobacterium_capsulatum	0.00032233	9.9e-05	5.4e-05	9.48e-05	0.000143048	9.64e-05	0.000171775	6.93e-05	0.000258854	8.27e-05	0.000302587	3.86e-05	5.63e-05	0.000180844	8.68e-05	0.000172618	7.48e-05	0.000257154	9.17e-05	0.000124838	8.07e-05	8.98e-05	0.0001883	3.34e-05	7.46e-05	0.000104018	4.33e-05	5.73e-05	8.71e-05	7.68e-05	5.96e-05	8.55e-05	7e-05	5.03e-05	0.000115782	0.000314364	4.35e-05	0.000111751	3.47e-05	9.85e-05	8.82e-05	0.000111404	4.8e-05	5.65e-05	5.56e-05	7.22e-05	0.000178843	0.000112856
Acidothermus_cellulolyticus	0.000111236	3.81e-05	4.84e-05	2.79e-05	6.47e-05	4.76e-05	5.64e-05	5.5e-05	0.0001091	6.33e-05	8.12e-05	4.86e-05	2.9e-05	9.51e-05	2.37e-05	0.000111085	3.7e-05	0.00016637	4.18e-05	9.24e-05	5.52e-05	3.87e-05	0.000123191	1.25e-05	3.58e-05	4.35e-05	1.52e-05	0.000100669	8.52e-05	6.11e-05	2.74e-05	5.42e-05	4.61e-05	5.14e-05	4.12e-05	0.000135236	1.17e-05	1.65e-05	1.11e-05	6.39e-05	4.92e-05	4.7e-05	5.18e-05	1.96e-05	5e-05	6.56e-05	9.79e-05	8.08e-05
Acidovorax_avenae	3.07e-05	1.25e-05	1.34e-05	1.68e-05	2.47e-05	2.56e-05	5.4e-05	1.81e-05	3.44e-05	1.8e-05	2.65e-05	1.12e-05	5.83e-06	6.3e-05	1.35e-05	2.56e-05	4.88e-05	3.96e-05	4.23e-05	1.23e-05	1.11e-05	2.23e-05	3.47e-05	9.86e-06	7.14e-06	3.98e-05	4.23e-06	4.19e-06	1.53e-05	5.04e-06	2.03e-05	2.13e-05	2.44e-05	6.16e-06	5.53e-05	0.000105918	1.6e-05	2.99e-05	1.01e-05	3.11e-05	4.98e-05	2.72e-05	7.23e-06	1.36e-05	1.44e-05	9.22e-06	3.75e-05	4.61e-05
Acidovorax_citrulli	4.9e-05	2.29e-05	1.58e-05	6.27e-06	3.19e-05	2.76e-05	3.61e-05	4.34e-05	5.72e-05	3.19e-05	5.19e-05	2.64e-05	2.17e-05	6.11e-05	4.31e-06	3.87e-05	1.5e-05	2.34e-05	4.89e-05	2.56e-05	2.08e-05	1.42e-05	3.4e-05	3.56e-06	2.35e-05	4.52e-05	1.75e-05	4.4e-05	3.12e-05	1.45e-05	2.55e-05	3.94e-05	2.65e-05	3.62e-05	4.66e-05	5.47e-05	1.67e-05	1.81e-05	8.09e-06	6.51e-05	1.89e-05	4.12e-05	4.4e-05	1.47e-05	3.6e-05	4.05e-05	3.62e-05	2.26e-05
Acidovorax_ebreus	5.4e-05	7.15e-06	4.42e-05	1.97e-05	3.92e-05	3.98e-05	8.91e-05	3.88e-05	7.14e-05	1.27e-05	3.26e-05	2.43e-05	6.93e-06	0.000143194	2.34e-05	3.05e-05	1.58e-05	5.4e-05	2.98e-05	4.03e-05	3.46e-05	2.27e-05	7.05e-05	1.07e-05	2.66e-05	9e-06	1.63e-05	2.24e-05	6.66e-05	1.51e-05	5.94e-05	1.98e-05	4.06e-05	1.19e-05	2.71e-05	0.000125915	1.4e-05	3.24e-05	3.38e-06	4.24e-05	5.09e-05	3.72e-05	1.42e-05	2.35e-05	3.72e-05	2.74e-05	7.72e-05	3.73e-05
Acidovorax_sp._JS42	3.79e-05	3.12e-05	2.06e-05	6.48e-05	3.36e-05	6.45e-05	6.88e-05	6.62e-05	9.87e-05	5.08e-05	7.12e-05	2.55e-05	1.46e-05	9.07e-05	8.62e-06	4.36e-06	1.64e-05	3.18e-05	2.04e-05	2.5e-05	2.68e-05	4.78e-05	3.82e-05	2.38e-05	4e-05	2.84e-05	1.7e-05	2.45e-05	3.42e-05	2.49e-05	3.85e-05	3.95e-05	1.7e-05	4.18e-05	5.06e-05	0.00019438	1.95e-05	3.17e-05	9.78e-06	6.36e-05	2.81e-05	2.31e-05	2.57e-05	2.33e-05	3.91e-05	4e-05	4.23e-05	2.8e-05
Acidovorax_sp._KKS102	6.67e-05	4.59e-05	2.99e-05	1.82e-05	5.39e-05	3.72e-05	0.000206427	5.33e-05	7.09e-05	4.03e-05	0.000139698	3.98e-05	3.63e-05	0.000113568	4e-05	3.49e-05	4.94e-05	5.46e-05	4.89e-05	4.27e-05	3.99e-05	3.1e-05	4.59e-05	1.1e-05	3.87e-05	5.49e-05	2.97e-05	4.12e-05	4.07e-05	3.94e-05	3.72e-05	7.33e-05	4.28e-05	4.85e-05	7.5e-05	0.000108799	3.26e-05	2.98e-05	2.2e-05	0.000100547	5.57e-05	4.55e-05	4.22e-05	3.65e-05	3.98e-05	4.97e-05	0.000101027	6.51e-05
Aciduliprofundum_boonei	0	4.66e-07	0	4.18e-07	5.56e-07	0	1.09e-05	0	4.98e-06	0	0	0	0	9.88e-06	8.92e-06	0	1.45e-06	1.08e-05	3.34e-05	8.05e-07	0	2.03e-06	3.51e-06	0	0	0	2.55e-06	0	1.16e-06	0	3.29e-07	1.32e-06	5.99e-06	6.79e-06	4.25e-06	3.39e-06	0	0	0	2.62e-06	1.08e-05	0	2.89e-06	0	0	0	8.18e-07	0
Aciduliprofundum_sp._MAR08-339	2.24e-05	6.06e-06	3.9e-06	2.82e-06	5.56e-06	4.18e-06	9.9e-07	2.75e-06	4.56e-06	1.46e-05	2.76e-05	1.55e-05	1.46e-06	6.79e-06	7.69e-06	1.09e-06	5.82e-06	5e-06	7.45e-06	7.85e-06	7.62e-06	1.5e-05	1.08e-05	2.74e-06	2.79e-06	0	1.94e-06	0	3.99e-06	4.09e-06	6.85e-06	1.46e-06	1.28e-06	6.16e-06	1.29e-05	2.03e-05	6.33e-06	0	1.45e-06	1.31e-05	7.57e-06	7.69e-06	2.49e-05	7.52e-06	1.61e-06	5.76e-06	1.07e-05	2.66e-05
Acinetobacter_baumannii	4.01e-05	4.16e-06	1.15e-05	2.51e-06	4.69e-05	6.72e-06	2.72e-05	2.03e-05	7.47e-06	1.7e-05	3.31e-06	1.88e-05	2.1e-05	1.85e-05	6.37e-05	8.39e-05	6.75e-05	1.84e-05	4.85e-05	1.05e-05	1.07e-05	9.12e-06	4.78e-05	1.42e-05	1.15e-05	5.57e-06	8.37e-06	1.96e-05	1.1e-05	2.43e-05	1.06e-05	8.8e-05	3.27e-05	5.98e-06	8.79e-06	2.27e-05	1.03e-05	9.16e-06	1.93e-06	1.51e-05	0.000106038	1.16e-05	3.76e-06	1.49e-05	1.74e-05	1.1e-05	3.03e-05	6.41e-06
Acinetobacter_calcoaceticus	2.65e-05	2.23e-06	7.59e-06	1.88e-06	9.44e-06	1.58e-05	0	7.42e-06	9.96e-06	6.95e-06	2.21e-06	5e-06	1.09e-06	2.47e-06	0	1.31e-05	1.18e-05	7.2e-06	1.46e-05	2.82e-06	5.76e-06	6.49e-06	1.26e-05	1.19e-05	7.65e-06	7.35e-06	7.22e-06	0	2.55e-06	3.78e-06	9.67e-06	3.65e-05	1.9e-05	9.51e-06	1.7e-05	7.63e-06	2.87e-06	0	1.93e-06	2.35e-05	2.71e-05	1.25e-06	0	9.54e-06	1.24e-06	4.35e-06	8.87e-06	2.38e-06
Acinetobacter_oleivorans	2.84e-06	1.33e-07	4.34e-06	4.18e-07	8.33e-06	1.14e-06	9.9e-06	2.09e-05	4.98e-06	2.88e-06	0	4.76e-07	1.64e-06	1.54e-05	1.26e-05	2.18e-05	3.93e-05	2e-06	6.76e-06	0	7.41e-06	0	4.22e-06	1.23e-06	1.05e-05	3.8e-06	1.02e-05	9.79e-06	4.34e-06	3.78e-06	3.57e-06	3.24e-05	3.77e-05	6.07e-06	1.46e-05	8.47e-06	2.87e-06	1.62e-06	1.33e-06	0	1.41e-05	0	0	1.1e-06	3.72e-06	2.43e-06	3.27e-06	0
Acinetobacter_sp._ADP1	5.25e-05	3.23e-06	1.64e-05	5.96e-06	1.61e-05	6.78e-06	0.000126232	7.97e-06	1.2e-05	1.08e-05	2.82e-05	6.67e-06	2.22e-05	4.14e-05	6.74e-05	5.61e-05	1.6e-05	4.2e-06	7.31e-05	3.83e-06	2.45e-05	8.11e-07	4.12e-05	4.25e-06	2.37e-05	6.21e-06	6.08e-06	6.01e-05	5.73e-06	2.2e-05	4.53e-06	8.04e-05	5.07e-05	9.05e-06	8.51e-06	7.35e-05	1.86e-06	1.04e-05	5.19e-06	0	3.03e-05	1.25e-05	1.33e-05	8.44e-06	3.34e-05	1.67e-06	1.93e-05	9.27e-06
Actinobacillus_pleuropneumoniae	6.54e-05	9.38e-06	2.36e-05	6.27e-07	0.000170268	3.55e-05	1.34e-05	1.1e-05	1.66e-05	4.56e-06	3.53e-05	1.91e-06	2.35e-05	1.42e-05	1.23e-05	1.47e-05	2.64e-05	8.46e-05	7.97e-06	6.73e-05	8.23e-07	1.68e-05	6.35e-05	4.22e-05	4.45e-06	7.22e-06	4.14e-06	1.12e-05	9.31e-06	1.26e-05	0.000116044	1.16e-05	7.07e-06	3.8e-06	9.21e-06	1.78e-05	3.42e-05	1.22e-05	0	1.39e-05	6.33e-05	0.000154635	1.16e-06	3.43e-05	6.2e-07	3.59e-06	2.91e-05	8.32e-06
Actinobacillus_succinogenes	3.51e-05	1.08e-05	1.89e-05	3.18e-05	0.000153325	3.17e-05	4.65e-05	3e-05	1.7e-05	1.37e-05	1.88e-05	2.5e-05	1.53e-05	3.02e-05	6.77e-06	1.96e-05	5.13e-05	4.56e-05	2.5e-05	2.42e-05	9.06e-06	1.4e-05	2.15e-05	1.07e-05	1.88e-05	2.72e-05	4.76e-06	2.24e-05	1.82e-05	2.93e-05	3.63e-05	1.2e-05	1.22e-05	1.01e-05	2.92e-05	3.15e-05	1.63e-05	2.69e-05	2.05e-06	6.39e-06	4.06e-05	4.86e-05	1.16e-06	1.94e-05	1.36e-05	1.14e-05	2.65e-05	2.85e-05
Actinobacillus_suis	0.000309374	8.68e-06	3.55e-05	1.04e-05	0.00167824	4.01e-05	9.26e-05	4.29e-05	9.29e-05	6.76e-05	0.000179454	2e-05	1.86e-05	9.94e-05	6e-05	9.97e-05	7.89e-05	0.00010978	4.18e-05	0.00063788	4.45e-05	5.55e-05	0.00136119	0.000171379	2.64e-05	1.03e-05	1.87e-05	7.69e-05	3.19e-05	7.53e-05	0.000608666	2.31e-05	3.51e-05	3.4e-05	4.95e-05	0.000122695	6.51e-05	1.87e-05	1.91e-05	3.6e-05	9.36e-05	0.000634335	2.37e-05	2.53e-05	2.51e-05	2.24e-05	5.28e-05	6.84e-05
Actinoplanes_missouriensis	7.71e-05	8.9e-05	5.21e-05	2.36e-05	6.58e-05	5.89e-05	8.91e-05	5.25e-05	0.000106611	0.000107884	7.01e-05	5.83e-05	2.22e-05	9.69e-05	1.69e-05	2.99e-05	6.61e-05	9.04e-05	4.09e-05	4.17e-05	2.45e-05	6.04e-05	4.38e-05	1.48e-05	5.95e-05	0.000122515	6.54e-05	0.000101368	6.73e-05	4.35e-05	3.72e-05	6.63e-05	5.69e-05	5.99e-05	7.52e-05	0.000183026	3.06e-05	4.72e-05	1.87e-05	8.66e-05	5.68e-05	5.28e-05	7.17e-05	3.3e-05	5.66e-05	5.33e-05	9.93e-05	0.000100264
Actinoplanes_sp._N902-109	8.28e-05	0.000121754	4.73e-05	6.12e-05	9.08e-05	9.6e-05	0.0001792	0.000150917	0.000160124	0.000128263	8.78e-05	8.22e-05	5.49e-05	0.000101223	3.78e-05	9.47e-05	9.22e-05	0.000120578	7.69e-05	8.52e-05	6.07e-05	7.78e-05	9.34e-05	2e-05	8.86e-05	0.00012809	6.81e-05	8.88e-05	0.000114896	8.41e-05	5.61e-05	0.00012851	8.16e-05	0.00010721	0.000138312	0.00019133	3.66e-05	5.15e-05	2.03e-05	0.000106941	0.000103333	0.000112235	7.43e-05	4.28e-05	6.41e-05	0.000164844	0.000141287	0.000151583
Actinoplanes_sp._SE50/110	8.31e-05	9.85e-05	3.95e-05	3.61e-05	4.83e-05	6.96e-05	0.000106926	0.000137447	0.000154317	0.000116995	0.000106568	7.05e-05	5.09e-05	6.48e-05	2.43e-05	2.45e-05	3.57e-05	0.000104581	5.2e-05	7.85e-05	7.7e-05	5.21e-05	6.04e-05	2.97e-05	9.59e-05	0.00014418	7.8e-05	0.000111156	0.000111656	6.55e-05	4.99e-05	0.00010563	7.87e-05	0.000121879	0.000112829	0.000109307	2.56e-05	5.59e-05	2.02e-05	0.000120308	3.68e-05	7.46e-05	0.00010963	3.76e-05	8.58e-05	0.000134744	9.61e-05	0.000121884
Actinosynnema_mirum	0.000186446	0.000123517	7.62e-05	3.7e-05	0.000111938	7.59e-05	9.55e-05	9.57e-05	9e-05	0.000114597	0.00014798	7.86e-05	5e-05	0.000182079	3.91e-05	2.89e-05	2.08e-05	0.000213362	8.13e-05	0.000136516	6.18e-05	8.6e-05	0.000123426	1.63e-05	0.000104549	0.000114533	6.63e-05	3.71e-05	0.000119061	6.3e-05	5.55e-05	8.47e-05	7.69e-05	7.78e-05	9.54e-05	0.00023268	5.04e-05	4.53e-05	1.61e-05	0.000132223	0.000185567	8.29e-05	0.000103844	6.7e-05	9e-05	0.000129877	0.000198281	0.000195063
Adlercreutzia_equolifaciens	0.000666149	0.0014321	0.000419219	0.000174687	0.000583857	0.000413543	0.000993026	0.00115043	0.00156142	0.00119728	0.000960768	0.000496028	0.000621656	0.000933847	0.000286146	0.000460677	0.00038432	0.000764862	0.000576644	0.000631839	0.000417305	0.000548975	0.000648043	0.000126171	0.00054136	0.00126912	0.000748895	0.000887148	0.00071425	0.00042046	0.000358107	0.00166729	0.0009048	0.000697679	0.00137205	0.00205853	0.000296454	0.000784736	0.000262874	0.000850293	0.000746596	0.000557849	0.000614389	0.000379802	0.000615052	0.000782847	0.00103059	0.000835609
Advenella_kashmirensis	5.28e-05	1.54e-05	7.59e-06	2.07e-05	4.44e-05	6.94e-05	0.000125737	2.61e-05	0.000159709	1.65e-05	2.6e-05	1.29e-05	4.63e-05	8.89e-05	5.35e-05	3.16e-05	9.7e-05	1.98e-05	4.94e-05	1.47e-05	1.44e-05	1.58e-05	3.26e-05	1.51e-05	2.48e-05	2.5e-05	2.5e-05	1.4e-05	3.56e-05	1.45e-05	5.09e-05	2.35e-05	2.03e-05	2.08e-05	2.21e-05	3.56e-05	1.05e-05	1.6e-05	2.42e-05	3.05e-05	1.73e-05	2.62e-05	1.91e-05	1.32e-05	5.01e-05	1.05e-05	4.33e-05	2.4e-05
Aequorivita_sublithincola	0.000202879	1.27e-05	6.48e-05	5.43e-05	8.5e-05	2.83e-05	0.000779174	7.37e-05	3.77e-05	2.04e-05	0.000225284	2.19e-05	5.54e-05	0.000257996	0.000119997	8.6e-05	5.46e-05	5.52e-05	8.91e-05	0.000104702	4.08e-05	6e-05	0.000101176	3.56e-05	1.05e-05	1.51e-05	4.74e-05	1.82e-05	3.89e-05	0.000103619	7.9e-05	3.01e-05	5.13e-05	5.18e-05	4.89e-05	2.24e-05	2.15e-05	7.25e-06	2.02e-05	4.04e-05	9.09e-05	5.15e-05	1.79e-05	2.61e-05	2e-05	2.46e-05	0.000124806	5.58e-05
Aerococcus_urinae	2.65e-05	2.09e-05	2.04e-05	1.22e-05	2.22e-05	3.52e-05	2.13e-05	1.81e-05	3.9e-05	8.15e-06	2.15e-05	4.43e-05	3.04e-05	1.6e-05	2.8e-05	3.92e-05	3.55e-05	2.1e-05	1.91e-05	2.54e-05	2.29e-05	2.66e-05	1.9e-05	3.82e-05	1.64e-05	2.6e-05	2.44e-05	4.19e-05	1.82e-05	1.07e-05	2.12e-05	9.02e-06	1.78e-05	1.35e-05	2.79e-05	2.49e-05	8.52e-06	9.26e-06	1.1e-05	2.21e-05	4.82e-05	1.73e-05	1.39e-05	2.59e-05	1.8e-05	2e-05	5.41e-05	2.09e-05
Aeromonas_hydrophila	0.000109656	7.2e-05	5.61e-05	3.84e-05	8.47e-05	7.24e-05	0.000258899	0.000122053	0.000123204	0.000103569	0.000157367	9.1e-05	0.000122326	0.000188868	8.49e-05	7.79e-05	9.83e-05	8.38e-05	0.000162874	0.000142556	7.53e-05	7.5e-05	0.000135604	4.44e-05	0.000117372	0.000156343	0.000110383	0.000152402	0.000116978	7.78e-05	7.06e-05	0.000109597	7.26e-05	0.000119525	0.000118593	0.000305382	7.61e-05	7.73e-05	0.000100706	0.000123214	0.000149319	9.37e-05	8.82e-05	7.76e-05	9.15e-05	0.000109383	0.000238226	0.000121884
Aeromonas_salmonicida	2.31e-05	1.61e-05	2.24e-05	1.01e-05	2.58e-05	2.81e-05	8.27e-05	4.4e-05	6.39e-05	2.25e-05	5.85e-05	9.05e-06	3.3e-05	6.97e-05	3.85e-05	2.72e-05	5.71e-05	6.4e-06	3.62e-05	8.05e-06	1.3e-05	1.3e-05	2.32e-05	1.71e-05	4.8e-05	2.26e-05	2.85e-05	1.68e-05	2.69e-05	3.15e-06	3.76e-05	2.3e-05	5.92e-05	2.13e-05	4.24e-05	5.13e-05	1.79e-05	5.1e-05	1.71e-05	2.15e-05	3.57e-05	5.24e-05	4.92e-06	1.47e-05	2.96e-05	2.86e-05	9.08e-05	1.45e-05
Aeromonas_veronii	7.9e-05	4.81e-05	3.75e-05	4.64e-05	6.36e-05	5.71e-05	5.15e-05	6.21e-05	3.48e-05	3.76e-05	0.000141354	4.02e-05	6.34e-05	0.000121591	2.65e-05	4.52e-05	1.87e-05	8.38e-05	0.000149186	3.2e-05	8.26e-05	5.03e-05	6.21e-05	9.03e-05	2.36e-05	6.41e-05	5.61e-05	7.9e-05	5.4e-05	1.89e-05	3.46e-05	5.6e-05	4.09e-05	6.91e-05	5.36e-05	0.000127101	5.9e-05	2.53e-05	1.91e-05	0.000104035	5.73e-05	0.000176666	5.99e-05	5.34e-05	5.16e-05	6.34e-05	9.23e-05	2.83e-05
Aeropyrum_camini	0	0	0	0	0	0	0	0	0	0	0	0	0	0	0	0	0	0	0	0	0	0	0	0	0	0	0	0	0	0	0	2.92e-07	0	0	1.05e-07	0	0	0	0	0	0	0	0	0	0	0	1.89e-07	0
Aeropyrum_pernix	0	0	0	0	0	0	0	0	0	0	0	1.43e-06	0	0	0	0	1.25e-06	0	0	0	0	0	0	0	0	0	0	0	0	0	0	0	0	0	0	0	0	0	8.45e-07	1.74e-06	0	0	0	0	0	0	5.66e-07	0
Aggregatibacter_actinomycetemcomitans	0.000108075	2.96e-05	8.23e-05	3.2e-05	0.000185545	3.12e-05	0.000115836	3.41e-05	2.95e-05	3.62e-05	7.56e-05	3.6e-05	1.57e-05	0.000143811	3.45e-05	0.000130689	0.000260506	0.00027695	0.000133072	0.000111347	6.86e-05	3.85e-05	9.63e-05	3.33e-05	3.77e-05	5.02e-05	3.21e-05	6.15e-05	2.27e-05	0.000109918	0.000139774	9.09e-05	6.76e-05	4.26e-05	3.72e-05	3.15e-05	6.43e-05	4.01e-05	8.57e-06	8.46e-05	0.000150401	9.37e-05	6.02e-05	9.12e-05	2.29e-05	2.61e-05	8.89e-05	7.75e-05
Aggregatibacter_aphrophilus	3.86e-05	3.86e-06	1.55e-05	5.64e-06	0.000113327	9.69e-06	1.49e-05	5.77e-06	9.13e-06	5.75e-06	1.71e-05	2.62e-06	1e-05	5.55e-06	1.29e-05	2.29e-05	1.27e-05	0.00010918	1.3e-05	3.46e-05	1.46e-05	1.44e-05	3.19e-05	8.77e-06	5.79e-06	2.34e-05	1.04e-05	3.01e-05	9.43e-06	4.13e-05	7.78e-05	1.21e-05	5.4e-06	5.98e-06	1.17e-05	3.15e-05	1.81e-05	7.92e-06	0	9.88e-06	1.79e-05	3.66e-05	1.16e-06	1.1e-05	6.33e-06	6.92e-06	1.95e-05	1.35e-05
Aggregatibacter_phage_S1249	0	0	0	0	0	0	0	0	0	0	0	0	0	0	0	0	0	0	0	0	0	0	0	0	0	0	0	0	0	0	0	0	0	0	0	0	0	0	0	0	0	0	0	0	0	0	0	0
Agrobacterium_fabrum	9.16e-05	3.85e-05	2.41e-05	4.17e-05	9.17e-05	3.84e-05	0.0001	1.95e-05	8.21e-05	3.57e-05	0.000109329	2.5e-05	2.86e-05	8.39e-05	3.69e-05	3.38e-05	7.04e-05	3.94e-05	4.73e-05	6.97e-05	7.12e-05	2.84e-05	7e-05	2.66e-05	4.81e-05	5.9e-05	3.67e-05	3.71e-05	3.59e-05	3.37e-05	6.62e-05	4.18e-05	4.25e-05	4.14e-05	4.96e-05	0.000111002	3.46e-05	3.22e-05	1.57e-05	6.68e-05	3.68e-05	4.57e-05	5.93e-05	3.05e-05	6.47e-05	3.51e-05	8.02e-05	6.3e-05
Agrobacterium_sp._H13-3	3.1e-05	4.25e-05	3.14e-05	2.46e-05	4.64e-05	4.42e-05	5.05e-05	7.56e-05	0.000139383	6.16e-05	5.14e-05	4.91e-05	1.88e-05	6.05e-05	1.26e-05	7.08e-06	1.54e-05	3.06e-05	3.34e-05	2.36e-05	2.92e-05	3.28e-05	3.44e-05	9.45e-06	3.85e-05	5.94e-05	2.89e-05	5.24e-05	0.00011154	2.33e-05	2.83e-05	4.11e-05	3.58e-05	6.24e-05	5.88e-05	8.27e-05	1.88e-05	5.36e-05	1.55e-05	4.74e-05	4.92e-05	6.42e-05	6.16e-05	3.67e-05	4.79e-05	4.83e-05	5.71e-05	4.21e-05
Agrobacterium_tumefaciens	0.000117872	5.46e-05	4.45e-05	3.32e-05	0.000117494	4.86e-05	0.000115341	6.93e-05	0.000116152	5.3e-05	6.29e-05	3.33e-05	2.44e-05	0.000125912	3.72e-05	7.84e-05	3.2e-05	8.08e-05	5.23e-05	4.63e-05	5.6e-05	5.29e-05	7.07e-05	2.67e-05	6.59e-05	7.21e-05	3.51e-05	6.29e-05	7.26e-05	4.57e-05	6.16e-05	7.04e-05	5.72e-05	5.59e-05	6.33e-05	0.00012439	3.16e-05	4.03e-05	1.7e-05	0.000119146	6.98e-05	5.03e-05	6.45e-05	5.8e-05	7.28e-05	6.19e-05	0.000102852	5.65e-05
Agrobacterium_vitis	0.000137148	4.33e-05	4.76e-05	8.94e-05	0.00012666	5.97e-05	0.00017029	6.38e-05	6.06e-05	9.83e-05	0.000129207	5.02e-05	5.72e-05	0.000106778	4.8e-05	4.36e-05	5.8e-05	0.000100582	6.95e-05	6.58e-05	8.42e-05	4.8e-05	0.000117805	2.82e-05	8.71e-05	8.37e-05	9.33e-05	6.85e-05	8.37e-05	8.13e-05	6.54e-05	7.5e-05	5.35e-05	8e-05	6.96e-05	0.000145234	4.6e-05	2.53e-05	3.5e-05	0.000122633	5.36e-05	5.24e-05	3.24e-05	5.65e-05	6.67e-05	7.45e-05	0.000148144	6.75e-05
Akkermansia_muciniphila	0.000362148	8.95e-05	0.000287793	0.000232463	0.00043081	0.000263596	0.000877189	0.000309806	0.000391185	0.000183883	0.000497501	0.000185743	9.77e-05	0.000825217	0.000174765	0.00041058	0.000242641	0.000421924	0.000261119	0.000273837	0.000168816	0.000240633	0.000450609	9.73e-05	0.000206203	0.000106425	8.48e-05	0.000128633	0.000350587	0.000258575	0.000258657	0.000145231	0.00026651	0.000236785	0.000282881	0.000508574	0.000134514	0.000149065	5.45e-05	0.000442583	0.000305671	0.000295344	0.000173556	0.000202194	0.000124523	0.00024733	0.00066819	0.000300078
Albidiferax_ferrireducens	6.38e-05	4.92e-05	7.76e-05	2.55e-05	7.56e-05	0.000148934	0.000228703	8.66e-05	0.000308219	8.06e-05	0.000122581	5.48e-05	4.47e-05	0.000120357	3.11e-05	5.77e-05	6.9e-05	8.52e-05	6.67e-05	7.63e-05	7.86e-05	3.2e-05	9.51e-05	2.32e-05	5.01e-05	5.36e-05	5.49e-05	3.22e-05	0.000120218	4.66e-05	0.00012893	5.33e-05	7.85e-05	0.000108387	5.58e-05	0.000466885	4.69e-05	5.24e-05	3.98e-05	9.01e-05	3.57e-05	4.93e-05	8.5e-05	5.3e-05	0.000121671	7.67e-05	0.000159719	6.87e-05
Alcanivorax_borkumensis	4.36e-05	8.25e-06	2.14e-05	6.69e-06	3.19e-05	7.6e-06	0.000257414	2.09e-05	3.73e-05	5.75e-06	4.91e-05	4.29e-06	3.77e-05	5.74e-05	7.69e-06	6.32e-05	9.14e-06	1.34e-05	3.12e-05	1.43e-05	5.15e-06	2.19e-05	2.58e-05	1.27e-05	4.14e-06	1.99e-05	2.3e-05	2.8e-06	1.81e-05	2.49e-05	2.09e-05	1.53e-05	1.67e-05	2.13e-05	3.87e-05	5.95e-05	6.84e-06	4.1e-06	8.69e-06	5.52e-06	3.73e-05	1.73e-05	5.21e-06	8.62e-06	1.43e-05	5.89e-06	1.97e-05	7.37e-06
Alcanivorax_dieselolei	2.94e-05	3.29e-05	4.1e-05	1.25e-05	3.06e-05	4.51e-05	5.45e-05	3.24e-05	3.19e-05	1.85e-05	6.24e-05	4.5e-05	4.19e-05	9.01e-05	1.57e-05	2.5e-05	2.41e-05	3.46e-05	1.06e-05	7.27e-05	3.21e-05	2.62e-05	4.64e-05	1.59e-05	3.15e-05	3.59e-05	2.82e-05	4.4e-05	3.25e-05	2.39e-05	3.97e-05	3.5e-05	2.79e-05	3.37e-05	6.57e-05	0.000113205	2.36e-05	4.28e-05	3.14e-05	8.28e-05	2.6e-05	7.73e-05	4.02e-05	5.41e-05	3.2e-05	3.65e-05	0.000104865	6.3e-05
Alicycliphilus_denitrificans	0.000180442	6.43e-05	8.68e-05	7.86e-05	0.000161936	0.000128219	0.00018613	0.000139372	0.000196629	0.00012131	0.000215897	0.000114303	5.2e-05	0.000280216	6.62e-05	6.53e-05	5.65e-05	0.000216161	7.29e-05	0.000139939	0.000108084	7.28e-05	0.000155512	4.26e-05	7.54e-05	0.000147221	0.000150907	0.000121642	0.000198203	0.000108973	9.93e-05	0.000144417	0.000116463	0.000121154	0.000109384	0.000393505	3.33e-05	6.24e-05	2.85e-05	0.000117983	8.55e-05	9.08e-05	7.29e-05	6.07e-05	0.00012688	0.000145375	0.000187083	0.000127349
Alicyclobacillus_acidocaldarius	0.000358672	0.000191432	0.000251358	9.07e-05	0.000407755	0.000260175	0.000435624	0.000369458	0.000536375	0.000249093	0.000374368	0.000267422	0.00011394	0.00068943	0.000126458	0.000132322	0.00012776	0.000395329	0.000118517	0.000266387	0.000262489	0.000161571	0.000394166	5.37e-05	0.000194311	0.000320415	0.000231778	0.00022301	0.000485442	0.000225505	0.000219178	0.000266122	0.000322484	0.00028206	0.000308645	0.000608391	0.000100928	0.000211	8.08e-05	0.000406548	0.000207748	0.000318207	0.000209135	0.000166049	0.000249295	0.000380537	0.000502747	0.000391313
Aliivibrio_fischeri	2.15e-05	1.73e-06	6.18e-06	6.27e-07	3.14e-05	5.32e-06	1.78e-05	8.25e-06	6.64e-06	5.51e-06	9.94e-06	4.29e-06	2.15e-05	1.79e-05	2.65e-05	4.57e-05	3.12e-05	4.4e-06	3.57e-05	1.31e-05	2.29e-05	1.22e-06	1.26e-05	2.51e-05	1.5e-05	8.11e-06	7.84e-06	0.00011535	7e-06	2.83e-06	2.23e-05	8.93e-06	1.52e-05	4.07e-06	5.2e-06	2.75e-05	1.22e-05	9.45e-06	2.42e-06	6.97e-06	9.9e-05	2.7e-06	0	1.06e-05	1.4e-05	2.05e-06	1.04e-05	1.33e-05
Aliivibrio_salmonicida	1.83e-05	1.46e-06	3.14e-06	4.18e-06	1.22e-05	6.59e-06	4.06e-05	7.7e-06	7.47e-06	6.47e-06	0	2.86e-06	7.29e-07	1.67e-05	5.54e-06	3.92e-05	1.1e-05	8.4e-06	1e-05	8.66e-06	3.91e-06	2.64e-06	5.39e-06	9.73e-06	5.48e-06	1.77e-06	5.37e-06	1.89e-05	0	1.39e-05	8.05e-06	4.68e-06	1.57e-06	1.81e-06	6.64e-06	3.03e-05	1.2e-05	4.77e-06	2.42e-06	0	4.65e-05	2.16e-05	3.07e-05	4.77e-06	8.43e-06	1.28e-05	8.81e-06	1.21e-05
Alistipes_finegoldii	0.00144417	0.00033385	0.00103352	0.00109744	0.00134854	0.00160641	0.00421269	0.00129503	0.00279139	0.00136054	0.00328483	0.000950621	0.00111843	0.00449395	0.000649214	0.00180024	0.00156595	0.00177988	0.00115104	0.00137382	0.00083317	0.0015851	0.00205233	0.00126048	0.000704751	0.000780069	0.00101829	0.000910218	0.00133565	0.000716514	0.00168536	0.000736219	0.000505722	0.00117397	0.00149887	0.00407147	0.000944636	0.000385068	0.000445448	0.00113421	0.00264717	0.00124893	0.00104192	0.000699974	0.00104518	0.00067372	0.00177131	0.00120079
Alistipes_shahii	0.00154339	0.00030866	0.000910333	0.000999853	0.00132993	0.00160096	0.00354687	0.00158147	0.00291128	0.00141161	0.00335385	0.00110826	0.00198839	0.00470997	0.000666752	0.0010063	0.00126161	0.00128437	0.000852317	0.00127173	0.000835229	0.00105234	0.00200362	0.000988683	0.000517989	0.000865208	0.00194232	0.00115979	0.00187298	0.000541087	0.00147761	0.00093391	0.00077891	0.0015684	0.0014633	0.00645318	0.000737464	0.000506266	0.000448347	0.001224	0.00183024	0.00128738	0.000866624	0.00054787	0.00132697	0.00083882	0.00165041	0.00116705
Alkalilimnicola_ehrlichii	0.000157057	6.47e-05	6.28e-05	3.8e-05	0.000125549	5.83e-05	0.000241574	6.54e-05	0.000153072	5.68e-05	0.000155159	5.91e-05	6.18e-05	0.000103075	4.98e-05	4.79e-05	4.61e-05	0.000123978	5.89e-05	8.7e-05	8.83e-05	5.88e-05	9.88e-05	1.78e-05	8.07e-05	7.7e-05	4.8e-05	7.76e-05	0.000103441	4.82e-05	6.4e-05	8.45e-05	6.64e-05	7.45e-05	9.03e-05	0.000249288	4.08e-05	5.97e-05	4.44e-05	6.07e-05	8.01e-05	5.86e-05	5.61e-05	4.57e-05	7.83e-05	8.91e-05	0.000143112	0.000121172
Alkaliphilus_metalliredigens	6.86e-05	4.72e-05	0.000141077	3.9e-05	6.86e-05	0.000130816	0.000140093	0.000186378	0.000307389	0.000122029	0.000147428	3.93e-05	3.39e-05	0.000222198	6.22e-05	0.000195488	8.87e-05	0.000100182	6.22e-05	7.55e-05	7.21e-05	0.000180627	0.000124831	3.07e-05	9.9e-05	5.52e-05	3.83e-05	7.97e-05	8.12e-05	5.04e-05	0.000165311	4.68e-05	0.000122453	0.000189428	0.000177293	0.00048434	8.86e-05	4.99e-05	1.23e-05	4.07e-05	0.000244537	0.000125953	8.91e-05	4.95e-05	4.86e-05	4.33e-05	0.000149214	8.15e-05
Alkaliphilus_oremlandii	8.56e-05	5.08e-05	0.000102799	3.78e-05	0.000118605	6.32e-05	0.000142568	5.94e-05	0.00015888	0.000122269	0.000134728	0.000130734	4.27e-05	0.00022837	5.82e-05	0.000212369	0.000133992	8.78e-05	0.00010916	7.15e-05	4.45e-05	9.08e-05	7.38e-05	4e-05	6.7e-05	8.84e-05	3.47e-05	0.000189454	6.22e-05	0.000105824	0.000101116	5.35e-05	0.000101635	0.000101958	0.000125904	0.000197261	8.27e-05	5.56e-05	3.86e-05	0.000168257	0.000298097	0.000154011	9.78e-05	0.000102565	5.68e-05	6.44e-05	0.000131474	0.000147069
Allochromatium_vinosum	9.29e-05	3.67e-05	8.08e-05	3.05e-05	0.000129993	0.000100092	0.000143063	0.000102261	0.000211563	5.87e-05	0.000124789	5.02e-05	4.25e-05	0.000147514	4.65e-05	4.25e-05	6.94e-05	0.000189966	6.45e-05	0.000102286	5.52e-05	3.79e-05	9.44e-05	3.58e-05	4.83e-05	5.64e-05	4.45e-05	7.27e-05	0.000119524	2.65e-05	8.17e-05	6.06e-05	8.8e-05	7.77e-05	6.5e-05	0.000361815	3.34e-05	6.66e-05	1.9e-05	5.46e-05	6.82e-05	5.61e-05	3.12e-05	4.62e-05	6.82e-05	8.52e-05	0.000167645	7.82e-05
alpha_proteobacterium_HIMB5	1.71e-05	1.76e-06	5.86e-06	3.08e-05	6.94e-06	0.000130056	1.53e-05	0.000107759	0.000268395	2.4e-05	1.77e-05	9.29e-06	3.65e-07	0	4.55e-05	8.98e-05	1.25e-05	6.8e-06	2.36e-05	2.82e-06	5.35e-06	1.24e-05	3.84e-05	9.32e-06	1.4e-05	3.17e-06	7.05e-07	0	1.46e-05	2.43e-05	6.36e-06	8.48e-06	2.3e-05	4.17e-06	2.89e-05	9.49e-06	4.05e-06	2.96e-06	1.69e-06	3.86e-05	2.22e-05	2.06e-05	6.65e-06	4.4e-06	7.69e-06	3.07e-06	6.96e-05	8.79e-06
alpha_proteobacterium_HIMB59	4.33e-05	2.11e-05	2.39e-05	6.32e-05	4.28e-05	0.000136074	5.4e-05	9.07e-05	0.000148094	2.23e-05	7.07e-05	2.02e-05	6.93e-06	7.41e-05	5.69e-05	0.000151926	7.04e-05	0.000122978	8.63e-05	3.7e-05	8.85e-06	3.73e-05	0.000121786	3.15e-05	3.77e-05	2.72e-05	1.37e-05	4.47e-05	1.64e-05	4.25e-05	2.18e-05	1.17e-05	4.62e-05	1.76e-05	3.74e-05	4.19e-05	2.4e-05	2.19e-05	7.49e-06	1.92e-05	3.84e-05	5.38e-05	2.57e-05	3.32e-05	2.47e-05	1.67e-05	6.06e-05	6.94e-05
Alteromonas_macleodii	0.00565216	0.000804494	0.00075993	0.00165556	0.00308511	0.0043135	0.0016925	0.00116913	0.00173357	0.000295843	0.00416222	0.00686605	0.00054673	0.00343604	0.00183995	0.0152721	0.000996322	0.00088624	0.00044132	0.000369882	0.000671147	0.000603913	0.00147689	0.0180692	0.000745599	0.000766512	0.000360484	0.00516769	0.00100114	0.00623383	0.00168167	0.000161264	0.000455935	0.00412577	0.00202836	0.00241916	0.000437213	0.000252608	0.000693832	0.000603575	0.0182023	0.000762574	0.000828441	0.000810796	0.0108941	0.00344673	0.00055194	0.00229442
Alteromonas_sp._SN2	4.01e-05	7.12e-06	5.75e-06	5.22e-06	1.42e-05	1.56e-05	0.000100491	2.42e-05	2.07e-05	1.75e-05	4.47e-05	1.4e-05	1.31e-05	4.94e-05	1.38e-05	7.35e-05	2.6e-05	1.42e-05	1.58e-05	2.19e-05	1.63e-05	1.03e-05	1.43e-05	3.84e-06	1.54e-05	1.53e-05	7.58e-06	1.12e-05	1.29e-05	1.2e-05	3.45e-05	1.93e-05	9.72e-06	2.17e-05	2.15e-05	2.78e-05	7.43e-06	9.83e-06	0	1.08e-05	2.16e-05	1.04e-05	9.83e-06	8.07e-06	1.6e-05	1.61e-05	3.2e-05	2.11e-05
Aminobacterium_colombiense	3.25e-05	1.45e-05	2.46e-05	2.34e-05	4.69e-05	2.19e-05	2.72e-05	1.46e-05	4.44e-05	2.92e-05	2.6e-05	4.38e-05	1.26e-05	2.78e-05	1.05e-05	4.03e-05	3.07e-05	2.86e-05	1.51e-05	1.57e-05	1.05e-05	1.97e-05	4.36e-05	6.85e-06	2.91e-05	2.39e-05	1.47e-05	9.79e-06	1.17e-05	2.11e-05	5.4e-05	1.52e-05	2.27e-05	1.28e-05	3.24e-05	6.39e-05	1.35e-05	3.91e-06	1.29e-05	2.47e-05	3.84e-05	4.93e-05	1.62e-05	1.94e-05	1.6e-05	1.19e-05	4.93e-05	4.3e-05
Ammonifex_degensii	5.15e-05	4.03e-05	4.88e-05	1.61e-05	6.11e-05	3.6e-05	0.0001	4.62e-05	0.000103707	6.33e-05	6.24e-05	4.52e-05	4.3e-05	7.9e-05	2.62e-05	6.92e-05	7.56e-05	4.6e-05	5.68e-05	3.38e-05	5.15e-05	4.4e-05	6.51e-05	3.95e-05	4.34e-05	6.4e-05	5.22e-05	6.15e-05	7.79e-05	2.96e-05	3.34e-05	3.96e-05	3.78e-05	5.49e-05	6.13e-05	0.000132863	2.88e-05	7.99e-05	3.24e-05	0.000102	8.93e-05	5.45e-05	5.03e-05	3.03e-05	7.95e-05	5.87e-05	9.99e-05	7.34e-05
Amphibacillus_xylanus	0.000108075	1.93e-05	3.09e-05	5.03e-05	4.03e-05	0.000123151	4.16e-05	0.000120954	0.000144361	4.79e-05	2.43e-05	2.6e-05	1.49e-05	7.65e-05	0.000154457	0.000113263	5.13e-05	5.42e-05	4.9e-05	3.06e-05	1.26e-05	6.16e-05	8.17e-05	2.85e-05	1.91e-05	1.46e-05	1.07e-05	5.94e-05	2.04e-05	7.24e-05	3.16e-05	2.74e-05	9.88e-05	1.22e-05	7.98e-05	5.78e-05	5.4e-06	2.35e-05	9.78e-06	8.63e-05	4.76e-05	4.2e-05	1.07e-05	2.77e-05	2.65e-05	3.2e-05	0.0001026	3.73e-05
Amycolatopsis_mediterranei	0.000111236	8.85e-05	6.71e-05	4.31e-05	0.000133882	9.72e-05	0.000134648	0.000164112	0.000186259	0.000104528	0.000154054	9e-05	3.92e-05	0.000143811	4.09e-05	5.61e-05	6e-05	0.000148973	7.33e-05	9.46e-05	0.000111583	6.45e-05	9.49e-05	2.73e-05	7.39e-05	9.74e-05	5.7e-05	8.6e-05	0.000136359	7.28e-05	7.01e-05	9.5e-05	8.99e-05	0.000124324	0.000124393	0.000269116	3.43e-05	5.53e-05	2.63e-05	0.00014559	0.000120646	9.87e-05	6.74e-05	4.86e-05	9.2e-05	0.000157543	0.000169973	0.00014897
Amycolatopsis_orientalis	0.000139993	6.75e-05	4.63e-05	1.02e-05	6.25e-05	4.55e-05	5.2e-05	0.000100336	0.000102463	8.65e-05	7.51e-05	6.36e-05	2.61e-05	4.26e-05	1.94e-05	5.61e-05	2.8e-05	0.00011358	5.86e-05	6.44e-05	4.28e-05	3.75e-05	7.31e-05	8.77e-06	5.39e-05	7.21e-05	3.88e-05	6.22e-05	8.19e-05	4.31e-05	3.59e-05	7.6e-05	4.59e-05	7.4e-05	8.65e-05	7.34e-05	1.97e-05	2.31e-05	2.29e-06	9.47e-05	0.000119564	4.61e-05	5.93e-05	3.06e-05	5.78e-05	0.000106309	8.48e-05	7.1e-05
Amycolicicoccus_subflavus	4.87e-05	1.93e-05	1.01e-05	1.08e-05	2.03e-05	1.61e-05	3.27e-05	4.32e-05	2.53e-05	1.27e-05	5.25e-05	2.14e-05	2.06e-05	1.42e-05	5.54e-06	1.25e-05	4.69e-05	2.08e-05	1.89e-05	2.76e-05	5.35e-06	1.93e-05	2.2e-05	5.07e-06	2.33e-05	3.22e-05	1.55e-05	3.5e-05	2.88e-05	2.08e-05	1.68e-05	2.07e-05	2.12e-05	2.56e-05	2.68e-05	2.49e-05	7.26e-06	1.02e-05	1.17e-05	4.94e-06	9.2e-06	1.12e-05	2.75e-05	1.21e-05	3.37e-05	2.78e-05	3.81e-05	2.99e-05
Anabaena_cylindrica	7.87e-05	1.28e-05	2.46e-05	1.25e-05	2.72e-05	1.1e-05	9.36e-05	2.09e-05	0	2.64e-05	6.02e-05	1.76e-05	0.000218947	9.44e-05	2.65e-05	3.49e-05	2.16e-05	1.94e-05	2.77e-05	1.61e-05	6.49e-05	1.72e-05	3.26e-05	1.79e-05	1.1e-05	1.34e-05	9.34e-05	0.000139119	3.25e-05	3.18e-05	5.25e-05	3.48e-05	4.91e-06	8.23e-05	5.3e-05	3.27e-05	1.22e-05	4.77e-06	6.56e-05	4.36e-06	1.24e-05	3.74e-05	4.17e-05	1.17e-05	2.08e-05	2.04e-05	5.38e-05	3.66e-05
Anabaena_sp._90	3.79e-06	6.59e-06	1.14e-05	5.54e-06	8.89e-06	1.8e-05	1.78e-05	3.46e-05	0.000196215	3.6e-06	2.21e-06	2.38e-05	2.53e-05	6.17e-06	2.68e-05	3.43e-05	1.54e-05	4.04e-05	3.43e-05	1.19e-05	4.06e-05	2.84e-06	5.67e-05	7.12e-06	1.83e-05	1.84e-05	4.03e-05	9.02e-05	5.13e-05	2.3e-05	1.24e-05	1.3e-05	7.07e-06	1.49e-05	1.27e-05	1.44e-05	5.06e-06	9.35e-06	3.74e-06	2.88e-05	2.38e-05	1.23e-05	4.63e-06	6.05e-06	1.18e-05	5.12e-06	3.98e-05	1.76e-05
Anabaena_variabilis	2.75e-05	4.36e-06	1.96e-05	2.61e-06	3.36e-05	5.32e-06	3.96e-05	4.12e-06	4.19e-05	1.03e-05	1.77e-05	5.24e-06	4.94e-05	4.75e-05	7.08e-06	0.000107818	4.3e-05	1.3e-05	9.7e-06	5.64e-06	6.38e-06	4.87e-06	5.15e-06	1.08e-05	6.1e-06	8.87e-06	1.33e-05	1.96e-05	1.17e-05	4.25e-05	2.91e-05	6.45e-06	4.52e-06	8.24e-06	1.01e-05	2.83e-05	6.08e-06	2.58e-06	1.33e-05	6.97e-06	2.16e-06	1.27e-05	2.6e-06	7.16e-06	2.37e-05	4.35e-06	6.48e-06	6.18e-06
Anaerobaculum_mobile	2.24e-05	1.35e-05	4e-05	6.58e-06	4.22e-05	2.67e-05	4.26e-05	3.27e-05	3.28e-05	1.63e-05	1.16e-05	3.57e-05	8.39e-06	9.94e-05	2.43e-05	2.89e-05	2.72e-05	4e-05	4.7e-05	4.49e-05	2.47e-05	3.14e-05	5.39e-05	1.29e-05	2.49e-05	3.97e-05	4.14e-06	4.96e-05	5.44e-05	3.4e-05	3.28e-05	1.41e-05	3.02e-05	1.66e-05	3.44e-05	7.1e-05	1.8e-05	2.8e-05	3.62e-06	3.28e-05	5.63e-05	4.59e-05	1.74e-05	1.61e-05	1.89e-05	2.33e-05	7.37e-05	4.02e-05
Anaerococcus_prevotii	0.000203511	0.00021336	9.39e-05	0.000233508	0.000181379	9.43e-05	0.000262365	0.000213318	0.000195385	0.000274506	0.000268905	0.000209556	0.000178111	0.000211088	0.000229532	0.000320732	0.000162037	0.00011098	0.000399215	9.2e-05	7.04e-05	0.000114539	0.000184787	0.000121924	0.000278384	0.0002278	0.000335289	0.000436932	0.000148103	0.00016094	0.00014083	0.000207754	0.00033574	0.000183362	0.000237433	0.000315719	9.38e-05	0.000138281	0.000507514	0.000121761	0.000361937	0.000179992	0.000358393	0.000435947	0.000364144	7.84e-05	0.000185699	0.00034427
Anaerolinea_thermophila	0.000162745	3.57e-05	9.13e-05	4.7e-05	0.00011416	6.78e-05	8.07e-05	0.000105559	8.42e-05	6.76e-05	0.000193258	9.33e-05	3.77e-05	0.000111099	6.95e-05	9.31e-05	9.27e-05	0.000209362	2.55e-05	0.000128865	7.45e-05	8.7e-05	0.000168861	4.14e-05	3.14e-05	2.76e-05	4.01e-05	7.27e-05	0.000134681	8.38e-05	3.04e-05	4.73e-05	8.64e-05	3.95e-05	0.000116906	0.000294366	2.35e-05	3.37e-05	1.38e-05	0.000125829	3.62e-05	5.59e-05	2.31e-05	4.4e-05	4.28e-05	8.62e-05	0.000198784	0.000160612
Anaeromyxobacter_dehalogenans	0.000279669	9.81e-05	0.000113317	7.31e-05	0.000176379	0.000142916	0.000279196	0.000241632	0.000200778	0.000156552	0.000282709	0.000143355	7.98e-05	0.000295646	0.000106459	6.59e-05	0.000105532	0.000299546	0.000136364	0.000155644	0.00017911	0.000129946	0.000253409	3.45e-05	0.000130506	0.000112633	6.84e-05	0.000128633	0.000216658	0.000113068	9.81e-05	0.000117613	0.000130309	0.000116989	0.00013434	0.000281487	5.48e-05	0.000102303	1.71e-05	0.000161573	0.000168796	0.000144866	0.000121489	5.08e-05	0.000133329	0.00015037	0.000236465	0.000209793
Anaeromyxobacter_sp._Fw109-5	0.000256284	7.56e-05	0.000114293	0.000122135	0.000221932	0.000142092	0.000340084	8.44e-05	0.000122375	0.00013977	0.000367742	0.000106683	6.71e-05	0.000382056	9.88e-05	0.00012851	0.000142925	0.000578096	0.00027446	0.000180008	0.000129289	8.92e-05	0.000278469	5.37e-05	7.79e-05	0.000163565	0.000133464	0.000181764	0.000180558	5.92e-05	0.000104167	0.000130744	0.000105956	0.00013039	0.000143725	0.000389608	9.46e-05	0.000164334	6.06e-05	0.000239744	0.000231553	0.000173756	9.43e-05	6.88e-05	0.000133577	0.000130645	0.000287607	0.000296514
Anaeromyxobacter_sp._K	4.42e-05	8.88e-06	1.26e-05	1.56e-05	2.22e-05	9.31e-06	3.51e-05	1.73e-05	2.65e-05	1.34e-05	4.53e-05	1.1e-05	1.31e-05	1.54e-05	1.26e-05	2.18e-06	1.45e-05	4.68e-05	1.11e-05	2.38e-05	1.83e-05	1.46e-05	6.56e-06	7.4e-06	6.62e-06	1.33e-05	9.43e-06	8.39e-06	2.45e-05	1.7e-05	8.14e-06	1.94e-05	1.79e-05	6.25e-06	1.36e-05	1.78e-05	5.74e-06	8.59e-06	3.62e-06	1.63e-05	5.95e-06	1.66e-05	1.1e-05	3.49e-06	7.19e-06	2.02e-05	2.69e-05	2.19e-05
Anaplasma_centrale	1.74e-05	4.96e-06	3.58e-06	6.16e-06	1.58e-05	6.97e-06	2.87e-05	6.05e-06	3.28e-05	4.79e-06	2.26e-05	7.86e-06	7.66e-06	2.47e-05	1.35e-05	1.31e-05	1.83e-05	6.4e-06	1.39e-05	6.85e-06	1.65e-05	5.88e-06	1.64e-05	4.25e-06	3.41e-06	9.63e-06	7.75e-06	2.03e-05	1.39e-05	1.1e-05	1.19e-05	7.62e-06	5.99e-06	6.25e-06	7.56e-06	1.56e-05	3.88e-06	5.73e-06	4.23e-06	6.1e-06	1.14e-05	8.31e-06	7.23e-06	8.62e-06	8.81e-06	4.61e-06	6.86e-06	1.5e-05
Anaplasma_marginale	2.84e-06	2.76e-06	1.52e-06	9.4e-07	0	7.6e-07	4.46e-06	0	0	1.92e-06	3.31e-06	1.43e-06	0	5.55e-06	3.38e-06	0	2.49e-06	3.4e-06	6.41e-06	2.42e-06	8.23e-07	2.84e-06	0	0	0	1.65e-06	1.06e-06	4.19e-06	2.89e-07	1.89e-06	3.97e-06	1.88e-07	0	1.36e-06	3.16e-07	2.54e-06	0	2.1e-06	0	1.74e-06	0	4.36e-06	1.74e-06	1.1e-06	2.6e-06	0	3.84e-06	3.33e-06
Anaplasma_phagocytophilum	0	3.33e-07	0	0	0	0	0	1.92e-05	0	0	0	4.76e-07	0	0	0	8.17e-06	3.74e-06	8.4e-06	0	0	0	4.05e-07	3.51e-06	0	0	5.07e-07	3.35e-06	0	0	0	3.29e-07	3.76e-07	2.52e-05	0	1.76e-06	5.08e-07	0	1.91e-07	0	0	1.08e-06	0	0	0	0	0	1.26e-07	0
Anoxybacillus_flavithermus	3.41e-05	9.45e-06	9.33e-06	1.12e-05	2.44e-05	1.29e-05	8.07e-05	2.53e-05	0.000322323	2.23e-05	1.16e-05	1.91e-05	4.72e-05	3.09e-05	5.29e-05	2.23e-05	2.12e-05	1.18e-05	1.44e-05	4.09e-05	2.18e-05	2.17e-05	3.44e-05	3.15e-05	2.31e-05	7.6e-06	7.22e-06	8.67e-05	1.84e-05	4.22e-05	1.88e-05	1.5e-05	3.27e-05	2.38e-05	3.07e-05	3.44e-05	4.39e-06	8.88e-06	4.11e-06	7.56e-06	2.43e-05	2.35e-05	1.5e-05	6.79e-06	2.79e-05	1.49e-05	3.77e-05	1.4e-05
Aquifex_aeolicus	7.27e-06	1.83e-06	9.11e-06	6.27e-07	5e-06	1.71e-06	1.29e-05	2.47e-06	2.65e-05	6.71e-06	1.05e-05	5.72e-06	4.74e-06	2.84e-05	7.38e-06	6.59e-05	3.49e-05	4e-06	2.43e-06	1.61e-05	5.35e-06	5.07e-06	2.34e-05	1.84e-05	1.03e-06	1.22e-05	3.52e-07	1.19e-05	6.19e-06	3.28e-05	8.59e-06	1.59e-06	1.54e-05	0	5.13e-06	3.39e-07	1.07e-05	7.83e-06	3.5e-06	3.2e-06	2e-05	4.99e-06	0	3.67e-07	1.04e-05	1.02e-06	1.3e-05	2.47e-05
Arcanobacterium_haemolyticum	0.000717027	0.00011816	0.000406424	0.000129657	0.000550248	0.000286655	0.000223753	0.000266648	0.000289551	0.000124187	0.000571491	0.000321239	0.000154958	0.000347492	0.000167073	0.00010564	8.85e-05	0.000913636	9.62e-05	0.000482437	0.000367072	0.000219955	0.000490424	0.000101512	6.9e-05	5.23e-05	0.000187906	0.000155198	0.000588767	0.000337943	0.000100388	0.00020337	0.000318065	0.000146961	8.35e-05	0.000829717	6.4e-05	6.65e-05	3.98e-06	0.00023771	8.17e-05	0.000188305	0.000102109	0.000128619	9.6e-05	0.000433179	0.000746697	0.000612748
Archaeoglobus_fulgidus	0	1.6e-06	4.34e-07	0	0	1.71e-06	2.03e-05	1.1e-06	1.66e-06	2.4e-06	0	5.72e-06	4.56e-06	0	3.08e-06	3.27e-06	1.25e-06	1.6e-06	3.29e-06	5.44e-06	1.24e-06	6.08e-06	9.37e-07	2.74e-07	0	9.25e-06	3.52e-06	0	9.83e-07	0	2.72e-06	3.55e-07	2.65e-06	4.71e-06	3.97e-06	1.47e-05	1.43e-06	0	7.25e-06	1.28e-05	0	1.25e-06	8.97e-06	4.22e-06	9.8e-06	1.02e-06	4.53e-06	0
Archaeoglobus_profundus	5.69e-06	2.13e-06	3.9e-06	1.15e-06	2.5e-06	5.7e-06	0	0	0	2.88e-06	0	0	0	0	0	1.63e-05	0	0	4.68e-06	0	2.47e-06	2.43e-06	0	8.22e-07	0	0	1.85e-06	0	1.39e-06	0	4.22e-06	0	3.54e-06	4.89e-06	6.05e-06	2.44e-05	3.54e-06	0	0	0	0	0	4.63e-06	2.2e-06	2.98e-06	5.25e-06	3.4e-06	3.8e-06
Archaeoglobus_sulfaticallidus	4.74e-06	4.69e-06	2.17e-06	1.46e-06	1.39e-06	8.93e-06	0	0	1.41e-05	1.41e-05	2.21e-06	1e-05	0	3.7e-06	7.38e-06	4.36e-06	1.25e-06	4.2e-06	1.56e-06	0	0	4.87e-06	9.37e-06	0	1.76e-06	3.8e-07	0	0	3.3e-06	9.45e-07	4.06e-06	3.97e-07	3.44e-06	5.61e-06	1.02e-05	1.2e-05	4.73e-06	1.15e-06	8.45e-07	6.97e-06	1.3e-05	7.27e-06	6.07e-06	7.16e-06	1.74e-06	7.69e-07	4.59e-06	8.55e-06
Archaeoglobus_veneficus	6.32e-07	7.32e-07	0	0	0	2.53e-07	0	3.85e-06	2.07e-06	7.19e-07	0	3.57e-06	2.92e-06	0	0	0	0	0	0	0	4.12e-07	9.12e-06	0	1.92e-06	0	1.01e-06	4.4e-07	0	2.6e-06	0	3.76e-07	3.13e-07	1.96e-06	1.81e-07	4.57e-07	5.76e-06	6.75e-07	2.29e-06	7.25e-07	0	0	0	0	7.34e-07	1.24e-06	0	2.45e-06	0
Arcobacter_butzleri	8.15e-05	8.02e-06	3.22e-05	1.57e-05	2.5e-05	6.55e-05	6.44e-05	0.000112157	0.000118227	7.19e-05	3.87e-05	3.33e-05	1.99e-05	3.21e-05	4.09e-05	0.000108363	2.51e-05	1.44e-05	2.04e-05	1.89e-05	1.54e-05	4.82e-05	6.18e-05	1.33e-05	3.12e-05	1.77e-06	1.98e-05	5.94e-05	2.05e-05	0.000101414	0.000103768	2.55e-05	9.74e-05	3.78e-05	6.41e-05	4.8e-05	7.34e-06	9.83e-06	4.11e-06	2.82e-05	0.000120105	3.41e-05	1.94e-05	3.82e-05	5.11e-05	2.1e-05	5.6e-05	5.75e-05
Arcobacter_nitrofigilis	0.000107443	8.68e-06	6.76e-05	2.84e-05	6.94e-05	7.13e-05	0.0001	7.53e-05	5.93e-05	2.92e-05	0.000137489	6.02e-05	7.29e-06	6.3e-05	5.51e-05	7.57e-05	4.72e-05	9.78e-05	2.43e-05	7.67e-05	5.89e-05	4.97e-05	9.77e-05	2.95e-05	2.28e-05	1.58e-05	2.57e-05	5.38e-05	6.71e-05	2.9e-05	2.75e-05	2.34e-05	8.01e-05	3.03e-05	4.62e-05	0.000285385	4.14e-06	7.44e-06	2.66e-06	5.64e-05	6.76e-05	4.2e-05	4.54e-05	2.11e-05	3.55e-05	6.02e-05	0.000148648	9.6e-05
Arcobacter_sp._L	3.13e-05	3.33e-06	1.77e-05	3.68e-05	2.69e-05	0.00011973	4.46e-06	6.27e-05	0.000232305	1.63e-05	4.03e-05	2.31e-05	4.74e-06	5.74e-05	0.000112612	0.000153559	7.62e-05	8.2e-06	5.18e-05	5.24e-06	1.65e-06	6.71e-05	4.73e-05	1e-05	2.6e-05	1.23e-05	6.25e-06	5.94e-05	1.44e-05	3.06e-05	1.96e-05	3.01e-06	9.63e-05	1.36e-05	9.84e-05	3.39e-05	1.69e-06	5.63e-06	6.4e-06	4.04e-05	9.95e-05	2.62e-05	9.83e-06	6.42e-06	7.81e-06	2.32e-05	8.86e-05	1.69e-05
Aromatoleum_aromaticum	0.000102071	3.34e-05	4.61e-05	3.16e-05	0.000134993	6.3e-05	0.000169299	7.01e-05	0.000185844	6.66e-05	0.00013252	8.67e-05	2.11e-05	0.000164797	2.12e-05	3.16e-05	2.89e-05	7.84e-05	7.21e-05	3.66e-05	4.8e-05	6.73e-05	0.000124831	1.11e-05	3.5e-05	4.94e-05	3.38e-05	2.24e-05	7.42e-05	2.36e-05	0.000106021	4.88e-05	3.78e-05	5.55e-05	5.04e-05	0.000192177	3.77e-05	3.66e-05	2.42e-05	8.25e-05	5.68e-05	5.2e-05	0.000106448	4.39e-05	5.11e-05	8.85e-05	0.000106249	9.29e-05
Arthrobacter_arilaitensis	0.00019561	0.000185076	9.2e-05	5.8e-05	0.000116105	0.00014944	0.000174745	0.000305408	0.000320663	0.000220564	0.000149085	0.000182409	0.000123967	4.63e-05	0.000101536	1.91e-05	8.31e-05	0.000157372	2.53e-05	0.000139134	0.000157081	0.000100551	0.00015598	1.21e-05	0.000146328	0.000133665	9.8e-05	0.000129332	0.000232279	0.000141413	8.27e-05	0.000199988	0.00011666	0.000227097	0.000202952	0.000197431	1.75e-05	4.89e-05	1.7e-05	0.000151112	3.19e-05	0.000113066	0.000179631	4.16e-05	0.000124896	0.00027269	0.000111407	0.000166076
Arthrobacter_aurescens	3.79e-06	1.41e-05	4.01e-06	1.25e-06	2.78e-06	2.85e-06	1.09e-05	5.5e-07	2.24e-05	4.56e-06	1.1e-06	7.86e-06	4.92e-06	0	0	1.09e-06	0	4.2e-06	1.73e-06	1.21e-06	2.47e-06	2.64e-06	2.58e-06	2.74e-07	1.91e-05	6.08e-06	6.78e-06	1.4e-06	3.24e-06	6.61e-06	1.24e-06	4.51e-06	2.75e-06	4.26e-06	7.8e-06	4.41e-06	1.52e-06	3.82e-07	2.42e-07	1.16e-06	0	1.66e-06	1.74e-05	0	3.72e-06	8.58e-06	3.71e-06	9.5e-06
Arthrobacter_chlorophenolicus	0.000228791	0.000161152	0.000102582	5.87e-05	0.000197489	0.000130752	0.000293056	0.000228437	0.000423541	0.000164943	0.00023467	0.000188838	8.95e-05	0.00033021	6.86e-05	3.65e-05	3.74e-05	0.000294747	5.35e-05	0.000139134	0.000134435	0.000107038	0.00015153	4.1e-05	9.16e-05	0.000160397	8.8e-05	8.6e-05	0.000250618	0.000114957	0.000138717	0.000166086	0.000146316	0.000149134	0.00016144	0.000343004	3e-05	7.37e-05	1.55e-05	0.000162736	0.000100628	0.000128239	0.000148969	7.03e-05	0.000200552	0.000226324	0.000230866	0.000231414
Arthrobacter_phenanthrenivorans	0.000119136	0.000126612	6.84e-05	1.46e-05	0.000118882	0.000116816	0.000197516	0.000271596	0.00036588	0.000179328	0.000204853	0.000117875	0.000104825	0.000188868	1.38e-05	4.68e-05	5.15e-05	6.6e-05	3.71e-05	8.26e-05	0.00010376	0.000108863	6.84e-05	2.58e-05	0.000135056	0.000136832	8.02e-05	7.83e-05	0.00019317	0.00012976	0.000106843	0.000192869	0.000121275	0.000211884	0.000201581	0.000199295	2.06e-05	3.93e-05	2.99e-05	0.000102582	6.17e-05	0.000128655	0.000208557	7.38e-05	0.000168181	0.000274611	8.06e-05	0.000125211
Arthrobacter_sp._FB24	0.000203511	0.000247401	9.6e-05	3.8e-05	0.00014027	0.000156219	0.000229693	0.000443405	0.000460461	0.000295603	0.000310869	0.000216223	0.000156417	0.000116036	2.46e-05	4.36e-05	3.49e-05	0.00016917	6.45e-05	0.000169135	0.000175816	0.000113525	0.000140523	2.67e-05	0.000194517	0.000252886	0.000190197	0.0002307	0.000318421	0.000218576	9.94e-05	0.000299857	0.000186872	0.000323441	0.000254094	0.000177433	1.77e-05	5.62e-05	3.97e-05	0.000253984	9.03e-05	0.000122627	0.000275665	8.88e-05	0.000203777	0.000384507	0.00015909	0.000212407
Arthrobacter_sp._Rue61a	2.24e-05	1.23e-06	6.51e-07	1.4e-05	1.44e-05	3.99e-06	0	1.1e-06	0	9.59e-07	0	4.76e-07	7.29e-07	2.47e-06	0	0	3.74e-06	2e-06	2.25e-06	3.62e-06	8.23e-07	1.22e-06	4.68e-06	0	9.93e-06	5.32e-06	0	5.59e-06	3.07e-06	2.83e-06	2.58e-06	1e-06	1.96e-07	1.45e-06	5.98e-07	1.02e-06	3.38e-07	1.53e-06	1.21e-06	3.78e-06	3.25e-06	8.31e-07	0	0	1.74e-06	5.12e-07	3.15e-06	1.9e-06
Arthrospira_platensis	3.07e-05	3.66e-06	1.25e-05	4.49e-06	8.33e-06	9.31e-06	0.000132667	3.49e-05	7.88e-05	5.99e-06	8.23e-05	1.36e-05	2.63e-05	7.78e-05	5.69e-05	2.07e-05	2.1e-05	9.8e-06	7.45e-06	1.93e-05	2.47e-05	1.2e-05	4.1e-05	1.11e-05	1.1e-05	9.5e-06	1.59e-05	7.48e-05	1.34e-05	0.000100784	1.87e-05	9.46e-06	7.66e-06	2.71e-05	9.53e-06	5.59e-06	1.33e-05	2.58e-06	0	5.81e-06	8.66e-06	1.08e-05	0	6.97e-06	1.59e-05	9.86e-06	4.1e-05	3.56e-05
Aster_yellows_witches'-broom_phytoplasma	1.26e-06	3.96e-06	1.19e-06	1.04e-06	2.78e-06	1.17e-05	1.49e-06	1.65e-06	0	2.88e-06	2.21e-06	1.43e-06	3.65e-07	0	6.15e-06	1.63e-05	2.49e-06	0	1.73e-06	8.05e-07	3.71e-06	2.84e-06	9.13e-06	0	3.93e-06	3.67e-06	4.67e-06	0	2.08e-06	7.56e-06	1.03e-06	2.3e-06	1.08e-05	1.81e-07	1.07e-05	1.22e-05	0	9.83e-06	2.66e-06	4.07e-06	2.16e-06	4.16e-07	0	0	6.95e-06	0	5.22e-06	0
Asticcacaulis_excentricus	9.48e-05	3.85e-05	5.4e-05	9.6e-05	0.00010805	6.7e-05	0.000119302	0.000100336	8.84e-05	4.58e-05	8.5e-05	5.38e-05	2.7e-05	5.49e-05	8.03e-05	5.28e-05	3.14e-05	8.4e-05	5.86e-05	3.4e-05	0.000124348	3.69e-05	6.75e-05	2.01e-05	8.81e-05	5.08e-05	2.69e-05	3.22e-05	6.96e-05	6.43e-05	6.25e-05	9.1e-05	6.44e-05	5.22e-05	8.09e-05	0.00014659	2.14e-05	4.03e-05	2.03e-05	4.18e-05	8.49e-05	0.000105792	5.79e-05	2.37e-05	4.13e-05	6.15e-05	8.18e-05	6.99e-05
Atopobium_parvulum	0.000122296	0.000355046	7.59e-05	2.97e-05	0.000123327	8.84e-05	0.000124747	0.00016851	0.000370028	0.000313584	0.000150741	9.24e-05	0.00013217	0.000203064	5.11e-05	8e-05	6.42e-05	0.000180767	6.51e-05	0.000100273	9.35e-05	8.07e-05	7.89e-05	4.3e-05	0.000168044	0.000424052	0.000187906	0.000155898	0.00013283	5.86e-05	7.65e-05	0.000356805	0.00013463	0.00011056	0.000215992	0.000510269	3.91e-05	0.000148206	2.99e-05	0.000110137	5.63e-05	7.98e-05	0.00016025	5.41e-05	0.00014474	0.000195328	0.000143426	0.000110242
Azoarcus_sp._BH72	9.58e-05	4.09e-05	5.61e-05	2.6e-05	9.36e-05	5.31e-05	6.29e-05	6.79e-05	8.21e-05	5.71e-05	6.18e-05	7.14e-05	2.92e-05	0.000148749	3.54e-05	1.91e-05	4.65e-05	0.000100182	3.43e-05	0.000100273	6.28e-05	3.93e-05	7.07e-05	1.99e-05	5.02e-05	7.51e-05	4.59e-05	6.57e-05	0.000113738	6.58e-05	4.2e-05	6.67e-05	6.76e-05	5.98e-05	6.8e-05	0.000161334	2.08e-05	3.83e-05	8.57e-06	0.000106069	6.82e-05	5.09e-05	3.7e-05	4.88e-05	5.28e-05	7.52e-05	0.000135626	7.15e-05
Azoarcus_sp._KH32C	0.000199402	5.76e-05	0.000139017	8.37e-05	0.000188879	8.08e-05	0.000189101	5.66e-05	5.43e-05	6.19e-05	0.00017338	7.81e-05	4.58e-05	0.00018393	6.71e-05	6.43e-05	4.82e-05	0.000270151	5.75e-05	0.00016551	8.03e-05	7.22e-05	0.000113355	3.34e-05	7.87e-05	6.87e-05	4.03e-05	5.73e-05	0.00014469	9.89e-05	6.71e-05	6.14e-05	6.85e-05	4.17e-05	5.04e-05	0.000312838	3.73e-05	7.12e-05	8.81e-06	9.68e-05	5.73e-05	8.56e-05	4.66e-05	5.52e-05	7.01e-05	9.89e-05	0.000200923	0.000163225
Azorhizobium_caulinodans	0.000132092	7.73e-05	5.71e-05	3.28e-05	0.000130271	5.11e-05	0.0001792	6.9e-05	8.96e-05	7.02e-05	0.000159024	7.98e-05	2.22e-05	0.000198743	3.42e-05	5.72e-05	5.61e-05	0.000116779	7.57e-05	0.000111548	6.63e-05	7.56e-05	8.62e-05	3.44e-05	5.76e-05	0.000111746	4.5e-05	7.27e-05	7.57e-05	5.76e-05	8.87e-05	6.71e-05	7.41e-05	4.66e-05	9.28e-05	0.000235222	4.83e-05	5.46e-05	3.72e-05	0.000122342	0.000130384	8.06e-05	5.93e-05	6.33e-05	7.74e-05	5.74e-05	0.000167582	0.000118083
Azospira_oryzae	6.89e-05	5.8e-05	6.31e-05	4.56e-05	9.44e-05	0.000104969	0.00017623	7.5e-05	0.000228571	9.85e-05	0.000244609	7.72e-05	2.66e-05	0.000261699	4.06e-05	5.83e-05	8.85e-05	7.54e-05	8.16e-05	8.68e-05	6.96e-05	6.37e-05	9.6e-05	3.01e-05	5.71e-05	0.000102877	5.02e-05	0.000118147	0.000102168	3.75e-05	9.73e-05	8.96e-05	7.35e-05	9.29e-05	0.000138734	0.00027081	5.1e-05	0.000160612	5.08e-05	0.000164189	0.000107661	0.000104545	8.3e-05	7.06e-05	0.00010071	0.00010759	0.000154435	0.000117845
Azospirillum_brasilense	0.000308426	7.16e-05	0.000178922	0.000212926	0.000314705	0.000157106	0.000391567	0.000183355	0.000306144	5.66e-05	0.000198227	8.03e-05	5.92e-05	0.000464146	0.000111997	5.5e-05	7.52e-05	0.000385131	0.000116958	0.000130073	0.000213491	0.000111903	0.000366061	6.38e-05	0.000168458	0.000137465	0.000114083	0.000113952	0.000229791	7.12e-05	0.000212794	0.000119847	0.000109393	6.8e-05	0.000135746	0.000497898	8.56e-05	9.36e-05	4.24e-05	0.000158667	0.000164467	0.000160247	9.63e-05	0.000100363	0.000175871	0.000145119	0.000321136	0.00018746
Azospirillum_lipoferum	0.000400385	0.000156859	0.000185103	0.000211463	0.000348037	0.000191631	0.000481662	0.000196824	0.000193726	0.000172615	0.000371607	0.000222891	5.32e-05	0.00034132	0.000145535	0.000126332	0.00012319	0.000477714	0.000145894	0.000210613	0.000212461	0.000183667	0.000411497	6.84e-05	0.000191622	0.000169266	0.000100957	0.00011535	0.000250329	0.000132595	0.000151486	0.00016713	0.000160162	0.000116627	0.000201932	0.000489255	0.000106075	0.000147633	6.67e-05	0.000257471	0.000201797	0.00017729	0.00014868	0.000140729	0.00012502	0.000220304	0.000428014	0.000346883
Azotobacter_vinelandii	0.000131776	5.22e-05	7.11e-05	2.76e-05	9.92e-05	4.95e-05	0.000181675	6.13e-05	0.000123204	5.75e-05	0.000198227	5.62e-05	6.73e-05	0.000236393	2.37e-05	6.97e-05	8.39e-05	0.000121578	0.000133591	9.56e-05	8.05e-05	7.68e-05	7.42e-05	4.81e-05	4.88e-05	6.9e-05	4.7e-05	7.69e-05	8.75e-05	9.07e-05	8.31e-05	7.47e-05	4.5e-05	8.5e-05	7.84e-05	0.000157267	4e-05	3.84e-05	4.12e-05	7.38e-05	9.47e-05	0.00014736	8.36e-05	3.45e-05	9.6e-05	6.74e-05	0.000105557	0.000106203
Bacillus_amyloliquefaciens	7.74e-05	4.21e-05	4e-05	3.21e-05	9.33e-05	4.17e-05	9.65e-05	2.5e-05	3.24e-05	5.71e-05	2.43e-05	0.000141926	3.9e-05	0.000122209	6.09e-05	7.35e-05	0.000102624	5.44e-05	7.26e-05	4.99e-05	4.55e-05	5.13e-05	5.41e-05	3.42e-05	4.72e-05	4.7e-05	2.66e-05	0.000102767	4.5e-05	6.52e-05	3.54e-05	6.3e-05	8.82e-05	5.63e-05	6.06e-05	0.000119136	2.7e-05	4.39e-05	1.68e-05	2.91e-05	0.00011253	6.05e-05	7.52e-05	5.96e-05	2.83e-05	3.59e-05	9.06e-05	4.78e-05
Bacillus_anthracis	4.74e-05	4.73e-06	1.74e-06	6.37e-06	2.5e-05	3.29e-06	0	0	0	0	0	7.14e-07	0	2.47e-05	2.18e-05	7.08e-06	1.93e-05	6.4e-06	9.36e-06	4.23e-06	4.53e-06	1.01e-05	1.03e-05	6.16e-06	0	5.07e-07	0	0	0	6.3e-07	1.02e-05	1e-06	0	0	4.92e-07	6.61e-06	4.47e-06	3.15e-06	3.38e-06	6.39e-06	0	7.07e-06	8.1e-06	3.85e-06	0	6.28e-06	3.15e-06	2.14e-05
Bacillus_atrophaeus	4.14e-05	1.03e-05	1.63e-05	5.01e-06	1.19e-05	1.53e-05	1.98e-05	9.9e-06	1.41e-05	1.94e-05	8.83e-06	2.93e-05	3.74e-05	3.83e-05	3.85e-05	3.05e-05	1.66e-05	2.1e-05	3.48e-05	1.65e-05	1.81e-05	1.32e-05	2.18e-05	1.21e-05	2.49e-05	2.09e-05	3.46e-05	2.87e-05	1.76e-05	1.76e-05	1.39e-05	2.9e-05	2e-05	3.93e-05	2.18e-05	3.9e-05	4.73e-06	8.4e-06	1.24e-05	9.3e-06	1.08e-05	2.41e-05	1.01e-05	2.94e-06	1.39e-05	7.81e-06	2.66e-05	7.13e-06
Bacillus_cellulosilyticus	4.11e-06	1.37e-05	1.41e-05	4.97e-05	2.72e-05	0.000159956	7.92e-06	7.42e-05	0.000247653	5.18e-05	2.71e-05	5.05e-05	1.06e-05	2.47e-05	8.74e-05	8.06e-05	3.84e-05	2.36e-05	1.75e-05	2.74e-05	9.47e-06	4.01e-05	8.15e-05	1.71e-05	3.17e-05	1.6e-05	1.21e-05	5.66e-05	1.85e-05	2.39e-05	7.82e-06	2.37e-05	5.96e-05	3.31e-05	5.51e-05	5.59e-05	7.59e-06	9.54e-06	1.58e-05	7.58e-05	4e-05	1.75e-05	1.65e-05	3.54e-05	1.02e-05	2.15e-05	8.34e-05	1.35e-05
Bacillus_cereus	9.42e-05	8.2e-05	4.7e-05	2.91e-05	0.0001	5.98e-05	0.000143063	6.62e-05	0.000135235	4.67e-05	9.55e-05	7.26e-05	2.26e-05	0.000245652	4.55e-05	9.42e-05	8.29e-05	5.72e-05	0.000107947	6.93e-05	4.61e-05	5.86e-05	0.000111715	4.95e-05	9.3e-05	2.72e-05	3.41e-05	0.000125837	3.93e-05	6.02e-05	6.05e-05	3.77e-05	9.51e-05	4.32e-05	0.000103831	0.000111849	5.73e-05	6.28e-05	3.07e-05	0.000167676	0.000115776	8.33e-05	4.31e-05	7.05e-05	4.18e-05	2.28e-05	0.000139463	7.22e-05
Bacillus_clausii	2.84e-05	7.69e-06	7.92e-06	2.51e-06	1.08e-05	3.99e-06	2.67e-05	2.09e-05	9.13e-06	6.71e-06	3.87e-06	2.81e-05	1.62e-05	0.000120974	5.97e-05	2.78e-05	1.89e-05	1.18e-05	1.02e-05	1.57e-05	1.91e-05	4.87e-06	1.66e-05	9.59e-06	1.95e-05	1.23e-05	1.27e-05	2.66e-05	1.83e-05	1.98e-05	9.58e-06	8.18e-06	1.23e-05	1.17e-05	8.79e-06	6.1e-05	1.27e-05	2.58e-06	5.19e-06	8.14e-06	4.87e-05	4.36e-06	6.36e-06	7.34e-06	1.24e-05	3.59e-06	2.09e-05	9.27e-06
Bacillus_coagulans	4.58e-05	3.3e-05	7.76e-05	3.14e-05	6.67e-05	7.68e-05	9.41e-05	0.000132224	0.000160539	0.000113399	0.000101046	0.000119304	5.31e-05	0.000222198	4.46e-05	0.000306029	0.000117166	5.34e-05	7.33e-05	2.32e-05	5.25e-05	7.34e-05	6.91e-05	4.06e-05	7.57e-05	5.75e-05	6.46e-05	3.71e-05	7.32e-05	4.88e-05	0.000101257	8.88e-05	9.93e-05	9.43e-05	0.000104991	0.000309957	3.7e-05	6.34e-05	2.31e-05	8.31e-05	0.000176911	8.94e-05	5.79e-05	5.23e-05	6.41e-05	5.01e-05	0.000151227	5.35e-05
Bacillus_cytotoxicus	5.88e-05	8.78e-06	1.76e-05	4.17e-05	4.22e-05	0.000130562	5.4e-05	8.8e-05	0.000247239	2.52e-05	3.64e-05	1.67e-05	2.22e-05	7.16e-05	9.45e-05	0.000157371	7.48e-05	2.34e-05	5.84e-05	1.61e-05	1.21e-05	3.08e-05	4.45e-05	2.01e-05	4.86e-05	1.47e-05	2.02e-05	3.85e-05	2.22e-05	3.87e-05	3.93e-05	1.7e-05	0.000100555	3.56e-05	7.44e-05	5.64e-05	7.34e-06	1.35e-05	8.69e-06	7.76e-05	5.41e-05	4.26e-05	9.26e-06	2.05e-05	4.94e-05	1.72e-05	6.47e-05	2.16e-05
Bacillus_halodurans	1.26e-05	1.66e-05	1.13e-05	5.85e-06	1.61e-05	8.74e-06	3.76e-05	2.23e-05	1.49e-05	2.49e-05	3.92e-05	1.64e-05	5.61e-05	2.65e-05	3.14e-05	3.92e-05	4.15e-05	1.3e-05	5.18e-05	1.67e-05	1.56e-05	6.69e-06	5.01e-05	2.36e-05	7.45e-06	1.91e-05	2.08e-05	2.24e-05	2.61e-05	6.17e-05	8.05e-06	1.86e-05	1.93e-05	1.87e-05	1.78e-05	1.2e-05	2.19e-05	7.06e-06	1.35e-05	2.53e-05	6.44e-05	1.1e-05	1.01e-05	1.58e-05	1.75e-05	1.47e-05	3.71e-05	1.31e-05
Bacillus_infantis	5.78e-05	3.27e-05	3.44e-05	5.12e-06	6.25e-05	3.61e-05	0.000113856	4.65e-05	6.89e-05	4.89e-05	2.76e-05	6.5e-05	2.08e-05	4.38e-05	3.05e-05	4.85e-05	4.03e-05	2.92e-05	5.42e-05	3.62e-05	4.92e-05	4.5e-05	4.22e-05	3.69e-05	3.01e-05	3.9e-05	2.05e-05	4.54e-05	3.89e-05	6.68e-05	3.93e-05	5.74e-05	3.76e-05	5.15e-05	5.44e-05	6.05e-05	1.97e-05	2.85e-05	1.16e-05	4.48e-05	7.68e-05	6.28e-05	3.1e-05	5.23e-05	3.86e-05	5.78e-05	7.54e-05	5.73e-05
Bacillus_licheniformis	2.69e-05	2.54e-05	1.97e-05	1.29e-05	2.94e-05	2.5e-05	7.77e-05	2.67e-05	4.69e-05	5.68e-05	6.57e-05	5.17e-05	1.9e-05	5.62e-05	1.66e-05	3.98e-05	6.05e-05	2.16e-05	3.48e-05	2.7e-05	9.68e-06	3.12e-05	3.23e-05	2.89e-05	3.11e-05	4.61e-05	4.75e-05	6.29e-05	3.61e-05	9.76e-06	2.7e-05	3.71e-05	3.47e-05	6.36e-05	2.43e-05	0.000123373	1.32e-05	2.44e-05	1.61e-05	3.2e-05	5.09e-05	2.14e-05	1.85e-05	1.96e-05	3.03e-05	3.51e-05	4.2e-05	3.83e-05
Bacillus_megaterium	4.55e-05	1.03e-05	2.83e-05	4.43e-05	9.64e-05	3.06e-05	9.5e-05	8.05e-05	1.62e-05	3.55e-05	3.64e-05	2.86e-05	5.23e-05	4.32e-05	7.72e-05	0.000137223	9.49e-05	5.08e-05	6.64e-05	4.33e-05	5.19e-05	3.61e-05	6.14e-05	5.85e-05	4.19e-05	5.95e-06	1.03e-05	0.000150305	1.5e-05	1.2e-05	5.06e-05	3.33e-05	6.36e-05	1.45e-05	7.49e-05	6.98e-05	3.66e-05	4.07e-05	2.68e-05	3.4e-05	0.000116858	3.62e-05	3.56e-05	1.8e-05	2.96e-05	2.11e-05	6.95e-05	3.04e-05
Bacillus_pseudofirmus	5.37e-05	1.45e-05	1.31e-05	1.31e-05	1.86e-05	2.29e-05	3.42e-05	2.06e-05	4.02e-05	3.04e-05	1.77e-05	1.43e-05	3.15e-05	2.84e-05	1.88e-05	4.63e-05	2.24e-05	1.88e-05	2.32e-05	9.66e-06	1.07e-05	1.8e-05	3.58e-05	1.49e-05	2.29e-05	1.53e-05	1.99e-05	3.15e-05	1.79e-05	1.26e-05	1.9e-05	2.41e-05	2.97e-05	3.51e-05	2.85e-05	3.41e-05	4.64e-06	7.63e-06	2.16e-05	1.77e-05	5.73e-05	1.56e-05	8.97e-06	1.61e-05	1.49e-05	2.16e-05	3.03e-05	4.32e-05
Bacillus_pumilus	2.65e-05	9.32e-06	1.65e-05	1.6e-05	1.67e-05	2.35e-05	8.76e-05	1.65e-05	2.82e-05	1.29e-05	2.1e-05	1.98e-05	1.86e-05	6.17e-06	4e-05	6.81e-05	1.89e-05	1.44e-05	4.26e-05	1.11e-05	1.56e-05	8.51e-06	1.83e-05	1.21e-05	2.15e-05	1.17e-05	1.81e-05	2.31e-05	1.34e-05	4.31e-05	1.47e-05	2.44e-05	3e-05	3.11e-05	3.4e-05	4.86e-05	1.38e-05	2.36e-05	1.14e-05	1.51e-05	0.000153106	2.24e-05	4.34e-06	1.45e-05	1.23e-05	8.84e-06	4.29e-05	8.32e-06
Bacillus_selenitireducens	3.25e-05	4.05e-05	2.5e-05	3.9e-05	2.06e-05	3.69e-05	5.15e-05	2.2e-05	1.66e-05	2.73e-05	4.69e-05	2.67e-05	2.24e-05	3.46e-05	2e-05	0.000103462	8.85e-05	4.38e-05	7.61e-05	2.44e-05	2e-05	2.64e-05	4.29e-05	1.79e-05	2.8e-05	5.31e-05	1.93e-05	3.64e-05	3.63e-05	3.59e-05	2.61e-05	4.09e-05	5.21e-05	2.47e-05	5.06e-05	4.46e-05	3.31e-05	3.38e-05	2.02e-05	3.66e-05	4.22e-05	4.53e-05	8.04e-05	3.54e-05	2.68e-05	1.58e-05	8.12e-05	4.59e-05
Bacillus_sp._1NLA3E	2.18e-05	1.64e-05	1.5e-05	9.93e-06	5.19e-05	1.46e-05	8.42e-06	2.67e-05	9.46e-05	2.49e-05	7.18e-06	3.02e-05	2.81e-05	3.64e-05	8.49e-05	0.00010564	0.000146041	2.7e-05	5.18e-05	2.84e-05	2.37e-05	3.67e-05	2.48e-05	4.11e-05	3.51e-05	3.79e-05	2.9e-05	8.25e-05	1.92e-05	4.06e-05	9.72e-06	1.59e-05	1.7e-05	1.87e-05	2.21e-05	4.69e-05	1.2e-05	4.49e-06	1.93e-05	5.11e-05	0.000154729	1.95e-05	5.79e-07	1.39e-05	2.26e-05	7.43e-06	3.28e-05	6.41e-06
Bacillus_sp._JS	2.24e-05	4.89e-06	1.46e-05	5.43e-06	1.28e-05	1.3e-05	2.57e-05	3.02e-06	1.04e-05	6.47e-06	2.21e-06	3.81e-06	9.66e-06	1.36e-05	1.42e-05	0	2.47e-05	7.6e-06	6.58e-06	1.35e-05	9.26e-06	1.05e-05	1.08e-05	5.07e-06	6.62e-06	6.97e-06	8.37e-06	6.29e-06	6.94e-06	1.26e-05	9.95e-06	9.14e-06	5.79e-06	6.16e-06	9.81e-06	2.1e-05	3.46e-06	4.77e-06	4.47e-06	9.88e-06	2.22e-05	1.04e-05	1.39e-05	4.95e-06	4.22e-06	7.81e-06	1.05e-05	2.28e-05
Bacillus_subtilis	3.82e-05	3.8e-05	4.61e-05	1.17e-05	8.17e-05	4.28e-05	0.000135143	9.29e-05	7.63e-05	9.47e-05	7.79e-05	5.36e-05	3.99e-05	0.000111099	5.45e-05	8.55e-05	0.000132746	4e-05	8.02e-05	4.29e-05	6.55e-05	3.63e-05	3.91e-05	6.93e-05	7.59e-05	5.79e-05	3.37e-05	4.54e-05	5.84e-05	4.85e-05	4.46e-05	6.81e-05	6.57e-05	8.31e-05	7.31e-05	6.46e-05	4.31e-05	2.63e-05	3.2e-05	5.32e-05	0.00012822	5.63e-05	5.93e-05	4.95e-05	5.67e-05	5.6e-05	9.15e-05	5.23e-05
Bacillus_thuringiensis	7.46e-05	2.67e-05	4.01e-05	3.55e-05	9.61e-05	3.79e-05	5.84e-05	6.98e-05	6.02e-05	8.27e-05	7.23e-05	9.17e-05	3.7e-05	0.000110482	8.98e-05	0.000172618	0.00010574	6.72e-05	8.01e-05	5.46e-05	3.71e-05	8.78e-05	0.000113355	4.12e-05	7.28e-05	2.47e-05	3.27e-05	6.43e-05	3.71e-05	4.72e-05	9.73e-05	3.98e-05	9.3e-05	2.49e-05	8.06e-05	9.95e-05	2.69e-05	1.26e-05	2.73e-05	6.19e-05	8.44e-05	0.000113898	3.38e-05	3.87e-05	2.08e-05	3.1e-05	0.000113231	8.17e-05
Bacillus_weihenstephanensis	3.16e-06	2.93e-06	9.11e-06	4.28e-06	1.17e-05	5.38e-06	0	2.25e-05	0	1.32e-05	1.1e-05	4.29e-06	6.93e-06	2.1e-05	1.85e-06	7.19e-05	0.000532854	3.6e-06	6.41e-06	7.25e-06	9.68e-06	8.31e-06	2.76e-05	1.37e-06	1.23e-05	2e-05	8.81e-07	4.47e-05	9.26e-07	1.89e-06	6.97e-06	8.66e-06	2.76e-05	6.79e-06	3.45e-05	3.85e-05	1.27e-06	6.58e-06	9.66e-06	1.28e-05	1.68e-05	1.27e-05	6.36e-06	4.22e-06	1.48e-05	3.46e-06	1.49e-05	2.85e-06
Bacteriovorax_marinus	7.93e-05	8.55e-06	3.65e-05	7.83e-05	5.81e-05	4.49e-05	0.000141578	4.43e-05	1.16e-05	6.71e-06	9.88e-05	1.91e-06	2.73e-06	1.54e-05	7.23e-05	6.32e-05	3.22e-05	6.16e-05	4.68e-05	4.77e-05	7.88e-05	1.64e-05	4.89e-05	3e-05	8.22e-05	3.04e-06	3.44e-06	1.89e-05	9.43e-06	7.81e-05	1.85e-05	2.53e-05	2.46e-05	1.18e-06	3.68e-05	0.000145573	1.29e-05	1.14e-05	2.42e-06	2.88e-05	8.39e-05	2.89e-05	9.26e-06	1.8e-05	1.61e-05	5.89e-06	6.29e-05	2.8e-05
Bacteroides_fragilis	0.00566069	0.000170768	0.000339084	0.000415717	0.00194962	0.000900444	0.0029271	0.00095031	0.00249976	0.00212988	0.00196957	0.000558418	0.00223468	0.00743066	0.00115412	0.00155465	0.00243721	0.0016633	0.00135497	0.000975948	0.000812994	0.000783324	0.00273855	0.00217409	0.000350256	0.000942113	0.00175899	0.000884351	0.00443447	0.00041983	0.00137534	0.00073434	0.000747879	0.000891001	0.00070084	0.0015686	0.0025161	0.0016503	0.000502805	0.00124289	0.00058321	0.00223639	0.000172978	0.000506036	0.000935414	0.000566002	0.0029632	0.00114685
Bacteroides_helcogenes	0.00179525	0.000220448	0.000482439	0.000480076	0.000876619	0.00114694	0.0030063	0.00104845	0.00182027	0.00118289	0.00134342	0.000848701	0.00339176	0.00274661	0.000949514	0.00158787	0.00159337	0.000530105	0.00106561	0.000862789	0.0011181	0.000494037	0.00115697	0.000599073	0.000394206	0.00158738	0.0020867	0.00129192	0.00199077	0.000510851	0.00103001	0.000872933	0.000912361	0.00135624	0.000598872	0.00311703	0.000684553	0.000461127	0.000738027	0.00107725	0.000691954	0.000857766	0.000228805	0.000532274	0.00125851	0.000666419	0.00164311	0.000746037
Bacteroides_salanitronis	0.00282102	0.000400433	0.00105911	0.00142978	0.00286179	0.00262937	0.00616953	0.00265603	0.00355426	0.00200018	0.00520747	0.00141188	0.00446061	0.0108414	0.00156334	0.00197612	0.00202526	0.00139555	0.00148475	0.00150772	0.00162743	0.00149549	0.00246734	0.00136007	0.000783551	0.00180846	0.00283525	0.002544	0.00322749	0.00125036	0.00274597	0.00144643	0.0017388	0.0022524	0.00197085	0.00776266	0.00122143	0.000876065	0.000983513	0.00322536	0.00159436	0.00234446	0.000607157	0.000919232	0.00298459	0.00136896	0.00274171	0.00114899
Bacteroides_thetaiotaomicron	0.0147141	0.00236383	0.00314306	0.00159851	0.00788012	0.00417097	0.0101243	0.00720554	0.00856748	0.0125458	0.00954197	0.00968433	0.060153	0.0257416	0.00847147	0.00679799	0.0127162	0.00376072	0.0153639	0.0155608	0.008083	0.00408447	0.00554127	0.0116749	0.0059832	0.0145924	0.044857	0.0174011	0.0272616	0.0118434	0.0050134	0.00975212	0.0086717	0.0209802	0.00302188	0.0311191	0.00692072	0.00233846	0.0125822	0.0122554	0.0151635	0.00576451	0.00174626	0.00966753	0.0187529	0.00935446	0.0185253	0.00921926
Bacteroides_vulgatus	0.00983202	0.0017332	0.00394745	0.00132467	0.00420699	0.00189635	0.00668634	0.0038356	0.00522022	0.00564404	0.00723171	0.00388154	0.0248329	0.0130152	0.0066386	0.00492968	0.00688244	0.00293407	0.00537519	0.00778644	0.00380475	0.00312863	0.00494686	0.00977669	0.00471206	0.00726083	0.0167771	0.00807731	0.0119073	0.004609	0.00455777	0.0062139	0.0214871	0.00774863	0.00320997	0.0101925	0.00459077	0.00179927	0.00635039	0.00866887	0.00857124	0.00352854	0.001107	0.00421397	0.00984083	0.00832019	0.00799872	0.00290265
Bacteroides_xylanisolvens	0.000612112	6.86e-05	0.000209935	0.000143448	0.000517749	0.000351841	0.00117173	0.000327124	0.0071973	0.000199227	0.000782419	0.000189553	0.00116675	0.00233801	0.000337837	0.00064582	0.000586035	0.000200364	0.000294906	0.000303436	0.000360484	0.000205359	0.000490189	0.00036591	0.000189864	0.00035703	0.000522139	0.000313193	0.000901635	0.000194955	0.000774916	0.00105854	0.00039574	0.000289938	0.0038642	0.00126779	0.000260336	0.0029102	0.000216626	0.000299608	0.000212617	0.000399265	5.35e-05	0.00018403	0.000693065	0.000313933	0.000618117	0.000200527
Bartonella_australis	8.85e-06	2e-06	2.16e-05	6.37e-06	8.06e-06	3.86e-06	1.49e-06	1.84e-05	0	3.6e-06	0	1.91e-06	7.29e-07	4.94e-06	1.23e-05	1.09e-06	3.12e-06	4.2e-06	1.04e-06	3.42e-06	1.03e-05	2.17e-05	3.98e-06	4.52e-06	1e-05	1.01e-06	1.23e-06	0	3.36e-06	1.26e-06	5.16e-06	4.97e-06	1.18e-06	9.05e-07	5.45e-06	1.14e-05	7.34e-06	5.34e-06	0	8.14e-06	1.08e-05	3.53e-06	1.74e-06	1.65e-06	1.49e-06	1.92e-06	1.1e-05	1.4e-05
Bartonella_bacilliformis	6e-05	2.96e-06	4.23e-06	2.72e-06	6.11e-06	1.5e-05	5.45e-06	1.92e-05	9.96e-06	1.15e-05	0	0	0	1.23e-06	1.63e-05	2.56e-05	1.16e-05	4.4e-06	3.47e-07	5.44e-06	1.38e-05	5.27e-06	2.34e-06	2.19e-06	4.65e-06	2.53e-06	1.02e-05	4.19e-06	7.23e-06	2.3e-05	1.29e-05	1.43e-05	2.18e-05	1.34e-05	1.75e-05	3.05e-06	1.1e-06	4.77e-07	2.42e-07	2.32e-06	1.79e-05	1.52e-05	0	5.69e-06	9.43e-06	5.89e-06	1.5e-05	4.99e-06
Bartonella_clarridgeiae	3.48e-06	1.9e-06	8.68e-07	0	3.89e-06	5.19e-06	3.96e-06	2.75e-06	0	2.4e-06	4.42e-06	1.91e-06	0	0	3.69e-06	9.26e-06	3.12e-06	1.12e-05	7.62e-06	3.42e-06	3.09e-06	2.23e-06	1.87e-06	0	1.86e-06	4.18e-06	1.76e-07	0	6.94e-07	1.26e-06	2.44e-06	2.78e-06	9.43e-06	1.27e-06	8.01e-06	2.54e-06	5.06e-06	2.67e-06	1.81e-06	4.94e-06	2.33e-05	8.73e-06	6.65e-06	4.04e-06	4.96e-07	1.79e-06	5.66e-06	9.27e-06
Bartonella_grahamii	7.9e-06	2e-07	3.47e-06	3.13e-06	2.22e-06	4.12e-06	5.89e-05	1.26e-05	1.66e-06	3.36e-06	2.65e-05	2.38e-06	1.09e-06	0	0	1.09e-05	3.53e-06	0	7.28e-06	0	1.21e-05	3.24e-06	9.37e-07	0	1.03e-06	7.6e-07	0	1.4e-06	1.27e-06	0	1.67e-06	3.42e-06	4.52e-06	1.09e-06	3.59e-06	5.83e-05	5.06e-07	1.24e-06	2.29e-06	5.23e-06	2.16e-06	8.31e-07	0	1.08e-05	4.96e-07	7.69e-07	1.45e-05	1.9e-06
Bartonella_henselae	0	2.66e-07	1.52e-06	0	0	1.27e-07	2.97e-06	2.75e-06	0	7.19e-07	0	1.43e-06	0	0	1.11e-05	1.2e-05	2.91e-06	8e-07	5.2e-07	0	1.24e-06	8.11e-07	0	3.97e-06	1.55e-06	1.39e-06	0	0	1.16e-07	0	1.27e-06	9.6e-07	5.11e-06	5.43e-07	1.48e-06	0	1.69e-07	0	4.83e-07	0	0	0	8.68e-07	0	8.68e-07	0	9.44e-07	3.8e-06
Bartonella_quintana	6.32e-06	1.2e-06	3.47e-06	4.91e-06	8.06e-06	2.41e-06	8.91e-06	3.3e-06	4.15e-06	4.32e-06	0	1.91e-06	0	1.54e-05	4.31e-06	4.9e-06	0.000111349	4.4e-06	3.99e-06	1.21e-06	2.88e-06	6.49e-06	9.37e-07	3.01e-06	4.96e-06	6.08e-06	0	4.19e-06	1.68e-06	1.26e-06	2.93e-06	4.18e-07	1.29e-05	3.17e-06	5.55e-06	8.47e-06	1.77e-06	2.86e-07	0	5.23e-06	1.08e-06	2.49e-06	1.16e-06	2.57e-06	3.72e-06	6.02e-06	1.14e-05	0
Bartonella_tribocorum	1.9e-06	1.06e-06	3.04e-06	3.24e-06	5.56e-07	1.18e-05	3.96e-05	5.22e-06	3.4e-05	4.32e-06	1.66e-06	3.57e-06	1.09e-05	0	3.69e-06	7.08e-06	6.86e-06	0	2.77e-06	1.61e-06	1.24e-06	3.24e-06	7.03e-06	1.51e-06	1.76e-06	5.07e-07	5.55e-06	4.19e-06	5.26e-06	2.83e-06	1.57e-06	4.78e-06	1.33e-05	1.89e-05	1.02e-05	3.73e-06	1.1e-06	5.73e-07	1.93e-06	1.45e-06	1.35e-05	2.14e-05	0	2.57e-06	4.84e-06	5.12e-07	1.67e-05	0
Bartonella_vinsonii	0	0	4.88e-06	3.13e-06	0	2.34e-06	8.42e-06	2.42e-05	0	1.44e-06	0	9.05e-06	9.48e-06	2.47e-06	1.66e-05	6.53e-06	4.15e-06	8e-07	1.14e-05	0	4.12e-06	1.2e-05	1.26e-05	5.48e-06	1.45e-06	1.27e-06	5.29e-07	0.00021532	5.79e-07	6.61e-06	3.73e-06	3.03e-06	4.52e-06	0	5.59e-06	3.05e-06	4.64e-06	9.54e-07	0	4.07e-06	1.08e-05	5.4e-06	0	2.75e-06	3.97e-06	1.15e-06	1.89e-06	6.65e-06
Bdellovibrio_bacteriovorus	0.000158953	2.26e-05	4.32e-05	2.16e-05	9.86e-05	3.79e-05	9.6e-05	3.49e-05	3.69e-05	3.62e-05	2.71e-05	3.02e-05	2.59e-05	6.48e-05	1.42e-05	0.000199845	5.63e-05	8.14e-05	6.43e-05	5.68e-05	5.02e-05	1.11e-05	4.36e-05	3.3e-05	9.61e-05	5.51e-05	1.97e-05	1.68e-05	2.34e-05	3.02e-05	5.64e-05	4.05e-05	2.19e-05	3.83e-05	4.28e-05	8.02e-05	9.35e-05	2.1e-05	2.22e-05	3.49e-05	0.000225061	5.22e-05	2.92e-05	6.02e-05	3.39e-05	3.48e-05	4.76e-05	5.42e-05
Bdellovibrio_exovorus	9.83e-05	2e-06	4.7e-05	7.52e-05	0.000135548	4.65e-05	0.000218802	3.22e-05	7.72e-05	1.99e-05	9.83e-05	1.52e-05	1.28e-06	1.85e-06	0.00011692	6.32e-05	2.29e-05	5.7e-05	3.29e-05	3.64e-05	0.000173345	3.89e-05	5.69e-05	1.93e-05	2.97e-05	1.39e-06	5.9e-06	1.19e-05	3.12e-06	5.89e-05	2.89e-05	6.13e-05	6.5e-05	2.99e-06	8.76e-05	0.00011151	3.83e-05	2.06e-05	9.66e-07	4.33e-05	0.000113612	4.82e-05	2.89e-06	5.8e-05	4.96e-06	2.2e-05	6.84e-05	3.11e-05
Beijerinckia_indica	4.9e-05	1.16e-05	3.12e-05	1.16e-05	4.25e-05	2.34e-05	4.8e-05	1.68e-05	4.89e-05	9.59e-06	9.28e-05	3.76e-05	1.93e-05	4.26e-05	2.52e-05	1.36e-05	1.27e-05	4.28e-05	1.72e-05	4.79e-05	4.01e-05	1.95e-05	4.94e-05	2.16e-05	1.17e-05	1.06e-05	1.45e-05	2.87e-05	3.19e-05	1.39e-05	2.63e-05	1.84e-05	3.02e-05	1.89e-05	2.73e-05	9.71e-05	1.6e-05	1.79e-05	3.5e-06	3.55e-05	1.62e-05	2.99e-05	2.23e-05	1.05e-05	1.75e-05	2.83e-05	4.01e-05	7.58e-05
Belliella_baltica	0.000143153	2.31e-05	3.69e-05	4.39e-05	0.000184157	9.46e-05	0.000460376	0.00011793	0.000513145	4.46e-05	0.000220314	4.24e-05	3.9e-05	0.000542532	6.77e-05	0.000224349	0.000157883	6.44e-05	7.99e-05	4.55e-05	6.73e-05	9.79e-05	0.000107968	5.52e-05	4.76e-05	1.93e-05	4.19e-05	0.000156597	0.000129764	7.31e-05	0.000273022	5.87e-05	0.000146512	3.96e-05	0.000140491	0.000228104	6.87e-05	9.17e-05	1.15e-05	0.000148496	0.000110907	0.000163988	2.08e-05	2.57e-05	0.00015367	2.6e-05	0.00011493	7.1e-05
beta_proteobacterium_CB	9.16e-06	2.7e-06	7.16e-06	0	1.17e-05	1.33e-06	9.9e-06	1.1e-06	2.9e-05	2.88e-06	2.71e-05	5.72e-06	6.93e-06	9.88e-06	6.15e-06	1.69e-05	7.48e-06	6.6e-06	3.47e-07	8.66e-06	1.65e-06	5.68e-06	1.38e-05	9.18e-06	2.9e-06	7.48e-06	1.04e-05	1.26e-05	2.44e-05	1.89e-06	5.87e-06	2.63e-06	1.57e-06	5.52e-06	9.17e-06	7.12e-06	5.06e-06	2e-06	2.17e-06	0	6.49e-06	8.31e-07	0	2.57e-06	1.61e-06	0	3.27e-06	0
Beutenbergia_cavernae	0.000168749	0.000175826	6.32e-05	3.61e-05	9.39e-05	0.000114662	0.000154944	0.000258951	0.000331449	0.000210974	0.000160128	0.000143831	8.29e-05	0.000112333	4.86e-05	3.32e-05	5.44e-05	0.000186566	5.54e-05	0.000138127	0.000112819	8.51e-05	9.84e-05	6.44e-06	0.000108686	0.000227926	0.000108797	0.000176171	0.000234014	0.000146767	6.29e-05	0.000192118	0.000104483	0.000191601	0.000172583	0.000128287	1.65e-05	4.91e-05	9.3e-06	0.000155471	5.36e-05	7.88e-05	0.000146366	4.4e-05	0.000114229	0.000255143	0.000109897	0.000182708
Bibersteinia_trehalosi	8.82e-05	1.9e-06	6.83e-06	2.09e-07	6.72e-05	3.99e-06	5.94e-06	4.95e-06	3.32e-06	6.23e-06	6.07e-06	3.81e-06	1.15e-05	1.6e-05	1.14e-05	5.72e-05	2.72e-05	3.8e-05	1.54e-05	7.45e-06	6.59e-06	8.51e-06	7.49e-06	2.53e-05	2.9e-05	1.41e-05	1.07e-05	1.82e-05	1.27e-05	1.07e-05	4.4e-05	8.85e-06	2.34e-05	7.52e-06	6.43e-06	3.17e-05	4.06e-05	2.58e-06	4.47e-06	4.94e-06	6.28e-05	2.35e-05	0	3.36e-05	1.18e-05	5.51e-06	1.74e-05	8.55e-06
Bifidobacterium_adolescentis	0.167458	0.29548	0.0751037	0.00687861	0.0966175	0.0870902	0.0893178	0.220927	0.226992	0.234982	0.122805	0.197768	0.132909	0.0262971	0.0253458	0.000803735	0.00027484	0.151759	0.00436364	0.0864023	0.0868156	0.094012	0.0541569	0.0131122	0.113243	0.197245	0.143526	0.0946235	0.173176	0.149157	0.0487032	0.160759	0.10361	0.191564	0.137196	0.038449	0.000453499	0.0149209	0.0003765	0.140093	0.0364144	0.0561106	0.258409	0.0491011	0.119396	0.173988	0.0531373	0.205
Bifidobacterium_animalis	0.00947209	0.0142834	0.00457075	0.000484986	0.0066488	0.00691328	0.00715959	0.020597	0.0219993	0.0152242	0.00974572	0.011837	0.00780188	0.00235653	0.00188087	0.00028697	0.000142925	0.0104033	0.000509588	0.00722004	0.0072453	0.00557186	0.00422294	0.000745108	0.00813044	0.0124554	0.00820789	0.00765646	0.0144454	0.00921138	0.00390472	0.0135004	0.00753241	0.0153915	0.0114434	0.00439024	0.00013443	0.00150496	8.51e-05	0.00862208	0.0021489	0.00473091	0.0133361	0.00269935	0.009309	0.018534	0.00404443	0.0114652
Bifidobacterium_asteroides	0.00189385	0.00294442	0.000937334	0.000134776	0.00124271	0.00139849	0.00149746	0.00437412	0.00548986	0.00294117	0.00203142	0.0023756	0.0016679	0.000606105	0.000338145	0.000121432	6.05e-05	0.00202524	0.000181241	0.00141852	0.00131862	0.00125161	0.000767487	0.000157817	0.00160061	0.00227255	0.00207781	0.00154919	0.00290669	0.00181506	0.000783131	0.00264992	0.0016024	0.00307848	0.0027621	0.00104104	6.93e-05	0.000367031	6.86e-05	0.00188744	0.000545339	0.000940487	0.00283417	0.000622179	0.00166296	0.00449023	0.00087446	0.00235501
Bifidobacterium_bifidum	0.0231086	0.0351099	0.0106527	0.00111363	0.0161038	0.017354	0.0183695	0.0489969	0.0527261	0.0368536	0.024266	0.0284529	0.0190577	0.00468034	0.00455834	0.000419837	0.00024451	0.0279852	0.00122416	0.0178743	0.0178194	0.0133163	0.00917027	0.0016168	0.0206859	0.0303404	0.0198098	0.0191789	0.0351963	0.0249101	0.00917173	0.0333745	0.0195772	0.0408194	0.0284508	0.0124539	0.000228437	0.00360542	0.000139225	0.0209359	0.00524727	0.0111246	0.0352302	0.00615427	0.0245936	0.047315	0.0098849	0.0289363
Bifidobacterium_breve	0.00957953	0.0144359	0.00449484	0.000428568	0.00635021	0.00642233	0.00643784	0.0188765	0.0205121	0.0156207	0.00884845	0.0119942	0.00801517	0.00208989	0.00197195	7.35e-05	4.24e-05	0.0119029	0.000429537	0.00782651	0.00699723	0.00575066	0.00336809	0.000700859	0.0077626	0.0120619	0.00811724	0.00684761	0.0139311	0.00950303	0.00337414	0.0126193	0.00739994	0.0146706	0.0109113	0.00455395	6.93e-05	0.00127621	8.4e-05	0.00847591	0.00241345	0.00421692	0.0141778	0.00255532	0.00894374	0.0172492	0.00371468	0.0130523
Bifidobacterium_dentium	0.054465	0.0806741	0.0255691	0.00249462	0.0375579	0.0390299	0.0413289	0.11349	0.110081	0.0859333	0.0555092	0.0698892	0.0463185	0.00891136	0.0112046	0.0002641	0.000157467	0.0506947	0.00235474	0.0351881	0.0404838	0.0316072	0.0215435	0.00324045	0.0464595	0.0662128	0.0410923	0.0425335	0.077241	0.0560346	0.0215978	0.0731893	0.0406425	0.0883939	0.0571055	0.0151318	0.000207931	0.00706225	0.000169171	0.0510955	0.0105205	0.0266647	0.0784743	0.0150818	0.0505137	0.0872733	0.0216312	0.0580472
Bifidobacterium_longum	0.0406367	0.0666892	0.0195081	0.00184205	0.0276382	0.0271845	0.0268988	0.075701	0.0877552	0.0641879	0.0388587	0.051084	0.0361645	0.00931501	0.0065869	0.000533645	0.000344849	0.0563067	0.00165127	0.0335835	0.191064	0.0247785	0.0152708	0.0033721	0.0320015	0.0529864	0.0360214	0.0294912	0.0589232	0.0397985	0.0141791	0.0508034	0.0341622	0.0638688	0.048835	0.0229619	0.000348859	0.00561101	0.00036044	0.034973	0.0120148	0.016478	0.0627108	0.012423	0.0403349	0.0726407	0.0157726	0.0641449
Bifidobacterium_thermophilum	0.00966359	0.0145093	0.00471671	0.000548404	0.00647131	0.00652736	0.00686108	0.0179523	0.0198952	0.0159185	0.00926976	0.0121976	0.00757819	0.00200348	0.00202302	0.000210191	0.000131084	0.0124644	0.000510281	0.00749408	0.00679918	0.00555321	0.00369902	0.000760999	0.0075685	0.0119341	0.00780697	0.00728104	0.0137854	0.00904351	0.0033839	0.0123408	0.00681664	0.0140383	0.0101326	0.00490068	0.000160421	0.00116618	0.000102879	0.00825157	0.00283328	0.00438257	0.0138845	0.00267531	0.00876353	0.0161365	0.00379702	0.0132336
Blastococcus_saxobsidens	0.000216783	0.000195891	0.00010204	3.48e-05	0.000148325	0.000140888	0.000177715	0.00031173	0.000415659	0.000264197	0.000167306	0.000222891	0.000124331	0.000126529	6.52e-05	2.56e-05	0.000194237	0.000181767	3.19e-05	0.000145778	0.000154817	0.000117377	0.000141928	1.74e-05	0.000158013	0.000204108	0.000122188	0.000209728	0.000270866	0.000180152	8.18e-05	0.000220801	0.00013355	0.000216865	0.0001826	0.000235391	2.07e-05	6.91e-05	3.85e-05	0.000172325	8.55e-05	0.000110364	0.000191201	6.77e-05	0.000148957	0.000338397	0.000143615	0.000226425
Blattabacterium_punctulatus	8.22e-05	1.73e-06	3.07e-05	1.73e-05	5e-05	7.86e-06	0.000476217	3.57e-06	7.47e-06	1.8e-05	0.000210927	1.43e-06	6.56e-06	0.000215408	3.66e-05	0.000108907	4.82e-05	3.96e-05	6.13e-05	7.03e-05	9.26e-06	4.22e-05	5.25e-05	3.62e-05	1.07e-05	3.93e-06	2.54e-05	1.47e-05	2.08e-06	4.22e-05	4.36e-05	2.11e-06	1.99e-05	4.11e-05	2.72e-05	1.49e-05	1.42e-05	2.58e-06	3.26e-06	5.81e-06	0.000120646	3.18e-05	1.3e-05	1.25e-05	1.86e-05	1.81e-05	0.000101782	3.02e-05
Blattabacterium_sp._(Blaberus_giganteus)	1.96e-05	2.1e-06	8.89e-06	5.75e-06	2.61e-05	1.27e-06	6.93e-06	8.25e-06	2.9e-06	1.75e-05	1.21e-05	7.14e-06	0	1.67e-05	1.2e-05	3.43e-05	6.02e-06	3.6e-06	1.09e-05	3.83e-06	5.56e-06	2.23e-05	3.04e-05	9.04e-06	4.76e-06	6.21e-06	8.63e-06	2.1e-05	7.35e-06	0	1.69e-05	5.55e-06	2.59e-05	1.9e-06	2.17e-05	2.24e-05	1.43e-06	1.72e-06	0	7.85e-06	1.35e-05	1.68e-05	1.74e-06	4.4e-06	2.48e-07	1.45e-05	1.24e-05	9.03e-06
Blattabacterium_sp._(Blatta_orientalis)	5.81e-05	5.99e-07	2.17e-07	6.37e-06	7.22e-06	5.32e-06	1.73e-05	7.97e-06	2.2e-05	1.92e-06	6.07e-05	4.76e-07	1.09e-06	3.21e-05	3.69e-06	4.9e-06	1.66e-06	6e-07	6.93e-07	1.21e-06	1.24e-06	3.53e-05	1.41e-06	8.22e-07	1.03e-06	1.65e-06	3.52e-07	0	3.59e-06	2.61e-05	1.7e-05	2.21e-06	2.36e-06	0	3.91e-05	2.44e-05	1.52e-06	2.77e-06	2.42e-07	3.78e-06	0	4.99e-06	1.16e-06	3.67e-06	9.18e-06	0	1.22e-05	0
Blattabacterium_sp._(Blattella_germanica)	2.21e-06	3.33e-07	3.04e-06	0	4.72e-06	2.79e-06	0	0	1.66e-06	2.88e-06	8.06e-05	1.91e-06	0	1.42e-05	9.23e-07	5.99e-06	1.25e-06	3.2e-06	9.53e-06	4.03e-07	1.65e-06	1.93e-05	5.62e-06	2.47e-06	4.03e-06	2.03e-06	2.64e-07	1.4e-06	3.7e-06	0	5.02e-06	5.85e-07	7.07e-06	2.9e-06	8.82e-06	1.85e-05	2.45e-06	0	0	5.58e-05	8.66e-06	8.31e-07	5.79e-07	6.24e-06	7.57e-06	7.81e-06	5.66e-06	2.85e-06
Blattabacterium_sp._(Mastotermes_darwiniensis)	6.95e-06	3.03e-06	9.76e-07	4.18e-07	3.89e-06	2.22e-06	3.96e-06	4.95e-06	1.66e-06	2.4e-06	1.05e-05	4.05e-06	1.29e-05	1.54e-05	3.08e-06	3.27e-06	7.27e-06	3.6e-06	2.77e-06	1.61e-06	3.91e-06	4.05e-06	2.34e-06	4.11e-06	3e-06	3.67e-06	1.67e-05	1.54e-05	9.55e-06	4.41e-06	3.52e-06	6.24e-06	3.04e-06	5.89e-06	3.51e-06	4.75e-06	1.43e-06	2.86e-06	3.26e-06	4.65e-06	0	1.87e-06	1.74e-06	0	1.49e-06	1.02e-06	2.52e-06	2.85e-06
Blattabacterium_sp._(Nauphoeta_cinerea)	2.12e-05	2.1e-06	3.36e-06	8.88e-06	1.47e-05	5.7e-07	5.89e-05	8.52e-06	0	2.25e-05	0	5.72e-06	8.39e-06	5.37e-05	3.63e-05	5.61e-05	4.86e-05	2e-06	3.26e-05	2.01e-06	2.26e-06	8.31e-06	2.08e-05	9.32e-06	1.23e-05	1.27e-06	1.32e-06	1.05e-05	2.6e-06	0	8.99e-06	7.56e-06	1.63e-05	1.63e-06	6.96e-06	1.19e-05	7.68e-06	5.73e-06	5.8e-06	1.16e-05	2.22e-05	1.23e-05	2.89e-06	8.99e-06	6.95e-06	3.97e-06	6.16e-06	0
Blattabacterium_sp._(Panesthia_angustipennis_spadica)	1.45e-05	8.32e-07	6.51e-06	1.57e-06	7.5e-06	4.94e-06	1.98e-05	1.73e-05	1.83e-05	7.67e-06	1.05e-05	4.05e-06	1.09e-06	0	1.32e-05	2.5e-05	1.04e-05	5e-06	8.66e-06	5.84e-06	5.76e-06	9.53e-06	1.5e-05	3.7e-06	9.72e-06	1.77e-06	3.96e-06	2.8e-05	4.51e-06	2.36e-05	3.78e-06	4.13e-06	4.81e-06	1.9e-06	1.21e-05	5.25e-06	1.69e-06	9.54e-07	4.83e-07	5.52e-06	2.98e-05	9.15e-06	1.91e-05	2.75e-06	6.2e-06	2.56e-06	1.19e-05	2.09e-05
Blattabacterium_sp._(Periplaneta_americana)	2.05e-05	5.99e-07	7.05e-06	2.11e-05	3.42e-05	3.46e-05	0.000785609	1.04e-05	2.74e-05	0	0.000147428	4.76e-07	1.29e-05	0.000167883	6.34e-05	3.43e-05	1.77e-05	1.84e-05	1.59e-05	3.64e-05	1.61e-05	3.91e-05	1.9e-05	1.59e-05	0	0	0	2.1e-06	2.31e-06	1.73e-05	3.36e-05	4.59e-07	7.86e-07	2.47e-05	2.99e-05	1.36e-06	1.04e-05	0	0	8.72e-06	5.41e-06	1.02e-05	0	1.28e-06	9.92e-07	6.28e-06	2.54e-05	2.61e-06
Bordetella_avium	0.000101439	3.25e-05	2.11e-05	7.37e-05	0.000110272	2.86e-05	6.14e-05	1.02e-05	3.11e-05	1.58e-05	6.68e-05	3.81e-06	6.02e-06	3.21e-05	2.03e-05	2.99e-05	3.59e-05	5.8e-05	2.74e-05	3.38e-05	2.57e-05	5.45e-05	3.19e-05	2.08e-05	4.59e-05	2.46e-05	6.08e-06	1.19e-05	1.37e-05	4.79e-05	2.84e-05	2.42e-05	8.74e-06	1.63e-05	3.03e-05	5.68e-05	2.92e-05	3.52e-05	1.16e-05	3.69e-05	4.65e-05	2.58e-05	1.94e-05	1.72e-05	1.23e-05	2.04e-05	7.03e-05	4.56e-05
Bordetella_bronchiseptica	0.000104599	6.48e-05	2.82e-05	1.81e-05	5.81e-05	2.71e-05	7.77e-05	4.67e-05	7.55e-05	3.93e-05	4.97e-05	5.26e-05	4.61e-05	2.84e-05	3.51e-05	2.07e-05	1.79e-05	8.42e-05	1.32e-05	2.96e-05	2.16e-05	3.39e-05	4.05e-05	8.77e-06	2.04e-05	2.75e-05	2.75e-05	3.15e-05	3.95e-05	1.86e-05	2.48e-05	2.6e-05	3.12e-05	3.68e-05	3.59e-05	6.49e-05	1.6e-05	1.43e-05	8.33e-06	3.17e-05	1.57e-05	3.12e-05	4.11e-05	1.1e-05	2.73e-05	3.13e-05	5.65e-05	4.99e-05
Bordetella_parapertussis	0	2.76e-06	2.07e-05	0	2.78e-06	2.22e-06	0	0	5.39e-06	1.44e-06	0	0	7.29e-07	1.23e-06	1.23e-06	0	2.08e-06	0	0	0	0	0	9.37e-07	1.1e-06	1.86e-06	1.77e-06	0	2.8e-06	1.68e-06	0	2.65e-06	1.61e-06	0	5.98e-06	3.06e-06	2.37e-06	5.06e-07	3.82e-06	7.25e-07	0	2.71e-06	0	1.16e-06	3.3e-06	2.48e-07	3.33e-06	2.39e-06	9.5e-07
Bordetella_pertussis	0	4.26e-06	0	8.36e-07	0	2.53e-07	2.97e-06	0	0	0	4.97e-06	0	7.29e-07	3.7e-06	0	4.36e-06	0	0	1.04e-06	0	0	0	9.37e-07	0	0	5.07e-07	1.41e-06	0	6.94e-07	0	9.39e-08	8.77e-07	5.89e-07	0	1.12e-06	4.41e-06	0	7.35e-06	0	0	3.25e-06	1.25e-06	0	0	2.23e-06	0	3.02e-06	0
Bordetella_petrii	8e-05	3.52e-05	4.49e-05	3.34e-05	8e-05	2.98e-05	7.23e-05	5.94e-05	5.43e-05	4.77e-05	3.59e-05	1.95e-05	1.91e-05	0.000125295	1.29e-05	3.54e-05	4.01e-05	3.14e-05	3.01e-05	6.16e-05	2.02e-05	2.51e-05	8.74e-05	2.88e-05	3.61e-05	6.18e-05	1.71e-05	4.54e-05	2.82e-05	3.24e-05	3.14e-05	3.18e-05	3.68e-05	1.78e-05	5.64e-05	5.63e-05	3.43e-05	5.96e-05	3.53e-05	5.46e-05	0.000169878	4.16e-05	3.3e-05	2.44e-05	2.55e-05	4.38e-05	5.87e-05	7.48e-05
Borrelia_afzelii	1.14e-05	1.33e-07	1.52e-06	1.17e-05	2e-05	0.00014659	0	6.32e-06	4.73e-05	1.58e-05	2.21e-06	1.1e-05	1.09e-06	0	6.55e-05	3.98e-05	2.08e-06	9.8e-06	8.32e-06	3.62e-06	9.47e-06	7.54e-05	4.33e-05	1.23e-06	3.31e-05	2.41e-06	1.23e-06	3.22e-05	5.96e-06	2.43e-05	6.48e-06	1.13e-06	6.38e-06	5.43e-07	5.13e-06	4.41e-06	5.23e-06	4.29e-06	0	1.13e-05	4.87e-05	4.16e-06	0	2.02e-06	1.13e-05	3.46e-06	1.71e-05	2.97e-05
Borrelia_bavariensis	1.36e-05	8.32e-07	3.36e-06	3.34e-06	2.78e-06	1.65e-06	0	2.75e-06	0	0	0	0	0	0	7.38e-06	0	0	2e-06	6.93e-07	1.81e-06	6.18e-07	3.65e-06	5.15e-06	8.22e-07	0	0	0	0	0	7.24e-06	1.24e-06	0	2.45e-06	0	2.39e-06	1.02e-06	4.22e-07	0	0	5.81e-07	0	1.66e-06	1.16e-06	9.17e-07	0	5.12e-07	1.07e-06	1.12e-05
Borrelia_bissettii	2.24e-05	2.7e-06	2.05e-05	5.01e-06	7.5e-06	2.22e-06	0	0	0	9.59e-07	0	0	7.29e-07	0	7.85e-05	3.27e-06	1.56e-05	3.2e-06	0	0	3.09e-06	7.91e-06	8.43e-06	5.48e-06	0	3.17e-06	7.93e-07	6.99e-06	5.21e-07	5.35e-05	9.86e-06	8.35e-07	1.77e-06	2.9e-06	2.28e-06	7.8e-06	7.59e-07	0	0	4.65e-06	0	0	9.55e-06	8.99e-06	2.23e-06	2.18e-06	1.11e-05	1.05e-05
Borrelia_burgdorferi	6.32e-07	4.66e-07	2.28e-06	8.36e-07	9.72e-06	2.15e-06	1.98e-06	1.68e-05	9.13e-06	3.36e-06	6.63e-06	1.67e-06	5.29e-06	3.7e-06	1.57e-05	1.09e-06	1.66e-06	4e-07	2.08e-06	1.41e-06	8.23e-07	4.46e-06	2.58e-06	2.6e-06	3.31e-06	2.53e-07	6.17e-07	0	3.7e-06	4.72e-06	1.27e-06	1.5e-06	2.16e-06	4.8e-06	4.22e-06	1.02e-06	9.28e-07	1.72e-06	1.93e-06	5.81e-07	2.33e-05	2.29e-06	2.02e-06	9.72e-06	2.11e-06	5.12e-07	7.42e-06	9.5e-07
Borrelia_crocidurae	0	1.33e-07	3.25e-07	2.09e-07	0	0	0	0	0	0	0	2.62e-06	0	1.23e-06	5.23e-06	1.63e-06	0	0	0	4.03e-07	0	0	9.37e-07	0	0	0	5.29e-07	0	0	0	0	4.18e-08	1.96e-07	0	1.9e-06	0	0	0	0	0	0	0	2.31e-06	0	0	0	7.55e-07	9.5e-07
Borrelia_duttonii	3.35e-05	5.69e-06	1.01e-05	8.04e-06	3.19e-05	8.81e-06	6.53e-05	2.23e-05	5.56e-05	1.97e-05	2.54e-05	1.19e-05	1.95e-05	5.68e-05	2.98e-05	4.47e-05	5.75e-05	9.2e-06	3.03e-05	8.86e-06	3.93e-05	1.4e-05	4.26e-05	9.45e-06	5.69e-06	9.12e-06	4.67e-06	3.57e-05	7.52e-06	2.43e-05	1.51e-05	1.43e-05	1.36e-05	1.17e-05	1.38e-05	2.81e-05	6.84e-06	1.62e-05	4.83e-06	1.28e-05	3.19e-05	1.95e-05	8.1e-06	1.47e-05	9.05e-06	7.69e-06	2.07e-05	1.66e-05
Borrelia_garinii	0	0	1.52e-06	0	6.67e-06	0	0	1.1e-06	0	0	0	0	0	9.88e-06	3.69e-06	1.52e-05	3.32e-06	4e-06	1.04e-06	1.01e-06	0	0	5.86e-06	7.53e-06	0	0	0	0	0	0	4.46e-07	0	0	0	7.38e-07	1.02e-06	5.06e-07	0	3.26e-06	0	0	4.16e-07	0	7.34e-07	0	0	1.26e-06	3.09e-06
Borrelia_hermsii	1.9e-06	5.96e-06	5.96e-06	0	7.5e-06	3.8e-07	8.91e-06	5.5e-07	0	6.95e-06	2.21e-06	2.86e-06	0	4.94e-06	1.23e-06	4.36e-06	8.31e-07	1.28e-05	1.04e-06	3.62e-06	0	2.84e-06	0	3.29e-06	4.96e-06	1.08e-05	6.87e-06	2.45e-05	1.09e-05	1.23e-05	2.44e-06	2.15e-06	1.57e-06	1.36e-06	3.41e-06	7.97e-06	6.75e-07	0	0	1.74e-06	1.51e-05	2.49e-06	0	0	7.44e-07	3.84e-06	3.21e-06	3.33e-06
Borrelia_miyamotoi	0	1.6e-06	4.77e-06	3.13e-07	1.11e-06	1.01e-06	0	1.04e-05	0	2.4e-06	1.1e-06	0	2.19e-06	0	3.69e-06	6.53e-06	1.14e-05	5.4e-06	3.12e-06	2.42e-06	4.12e-07	4.46e-06	3.98e-06	8.22e-07	2.07e-06	1.27e-06	0	2.8e-06	1.27e-06	0	2.65e-06	1.34e-06	5.01e-06	0	8.75e-06	8.98e-06	5.06e-07	1.91e-07	0	3.78e-06	2.16e-06	5.2e-06	0	0	2.11e-06	0	1.2e-06	4.75e-07
Borrelia_recurrentis	1.26e-06	4.66e-07	1.74e-06	4.18e-07	5e-06	5.7e-07	1.14e-05	1.1e-06	9.54e-06	9.59e-07	1.1e-06	3.1e-06	4.56e-06	1.54e-05	4e-06	6.53e-06	8.31e-06	3e-06	6.76e-06	2.21e-06	7.41e-06	3.45e-06	7.26e-06	2.74e-06	1.55e-06	1.01e-06	1.32e-06	4.89e-06	1.68e-06	6.3e-07	2.11e-06	2.94e-06	6.87e-07	5.43e-07	2.28e-06	3.05e-06	7.59e-07	2.86e-06	4.83e-07	3.78e-06	5.95e-06	4.16e-06	1.16e-06	1.28e-06	7.44e-07	3.84e-07	3.96e-06	1.43e-06
Borrelia_turicatae	7.3e-05	1.89e-05	3.96e-05	4.17e-05	4.67e-05	0.000125051	3.17e-05	2.58e-05	0.000118641	2.66e-05	4.42e-05	2.55e-05	1.24e-05	0.000107395	8e-05	7.73e-05	4.4e-05	2.64e-05	6.31e-05	3.34e-05	1.83e-05	5.11e-05	8.78e-05	1.22e-05	4.2e-05	1.79e-05	4.85e-06	5.24e-05	1.6e-05	3.62e-05	2.2e-05	5.49e-06	2.12e-05	6.34e-06	4.25e-05	3.47e-05	2.92e-05	4.28e-05	1.03e-05	7.53e-05	0.000127679	7.5e-05	1.74e-05	4.7e-05	1.19e-05	1.91e-05	0.000107255	6.37e-05
Borrelia_valaisiana	5.69e-06	5.99e-07	5.42e-07	9.72e-06	0	0	0	0	0	0	0	0	0	8.02e-06	0	0	0.000112387	1.6e-06	0	0	0	0	0	2.74e-07	0	0	0	0	0	0	1.22e-05	0	0	0	0	0	0	0	0	1.74e-06	0	4.78e-06	0	0	0	0	0	0
Brachybacterium_faecium	0.000245224	0.000245937	0.000127306	4e-05	0.00015888	0.000166735	0.000175735	0.000408768	0.000782784	0.00031742	0.000203749	0.000180027	0.000148942	0.000241331	7.26e-05	0.000157371	0.000112803	0.000318343	0.000135324	0.000176987	0.000180963	0.000146569	0.000155277	8.04e-05	0.000152325	0.000238189	0.000177071	0.000212524	0.000291115	0.000126925	0.000117757	0.000244495	0.000151618	0.000273277	0.000288048	0.000337242	4.12e-05	0.000120149	2.17e-05	0.000255727	0.000132007	0.000149854	0.000293888	9.1e-05	0.000177979	0.000405257	0.000203439	0.000242106
Brachyspira_hyodysenteriae	0.000166537	0.000124116	8.27e-05	2.7e-05	0.000132493	0.000115422	7.52e-05	0.000486563	0.000214882	0.000112679	0.00013252	0.000143831	0.000174647	6.05e-05	0.000213225	0.000104551	0.000134823	0.000131376	5.16e-05	2.64e-05	5.64e-05	0.000191168	0.000131857	8.21e-05	9.43e-05	0.000209429	0.000172137	8.6e-05	5.85e-05	4.16e-05	6.82e-05	9.27e-05	0.000140424	0.000151036	0.000218417	0.000505693	5.86e-05	1.21e-05	4.02e-05	6.6e-05	8.93e-05	0.000108494	0.000250789	2.11e-05	9.26e-05	3.69e-05	0.00015953	0.000112856
Brachyspira_intermedia	0.000146629	8.83e-05	6.87e-05	2.75e-05	0.000100272	9.2e-05	5.74e-05	0.000307057	0.000314441	9.59e-05	0.00011209	6.41e-05	0.000148942	6.3e-05	0.000239071	0.00012851	0.000199431	0.00011098	0.000112279	1.81e-05	9.68e-05	0.000204548	0.000150125	0.000113431	5.34e-05	0.000141266	0.000138045	0.000135624	4.12e-05	9.1e-05	5.26e-05	8.6e-05	0.000129425	0.000122422	0.000173672	0.00036317	4.93e-05	2.46e-05	1.65e-05	4.39e-05	7.63e-05	7.98e-05	0.00012496	3.05e-05	6.73e-05	5.23e-05	0.000137136	6.61e-05
Brachyspira_murdochii	0.000226579	0.000125115	7.74e-05	5.3e-05	0.00010305	0.000155142	0.000105936	0.000489587	0.000410267	9.06e-05	0.000196571	0.000148832	0.000202175	9.32e-05	0.000248609	0.000198211	0.000230176	0.000150973	9.11e-05	2.92e-05	9.16e-05	0.000246512	0.000212657	0.000101101	0.000103722	0.000248451	0.00019143	0.000241886	6.02e-05	9.61e-05	9.02e-05	0.000113709	0.00019895	0.000168693	0.000251422	0.000638556	4.55e-05	1.75e-05	5.94e-05	6.89e-05	0.000195846	0.000107247	0.000316451	3.38e-05	9.77e-05	3.89e-05	0.000218222	0.000121647
Brachyspira_pilosicoli	0.000411129	0.000258881	0.000200176	8.27e-05	0.000221377	0.000260618	0.000555421	0.000908251	0.00106196	0.000270191	0.000419094	0.000310047	0.000374088	0.000160476	0.000544293	0.000337068	0.000373309	0.000200964	0.000107254	5.15e-05	0.000164493	0.000424503	0.000407047	0.000166036	0.00019369	0.000522495	0.000412372	0.000338361	0.000157128	0.000217946	0.000168151	0.000204309	0.000393579	0.000417612	0.000513425	0.0013249	0.000111814	2.66e-05	0.000134637	8.17e-05	0.000206125	0.00016565	0.000635794	5.34e-05	0.00022759	0.000112842	0.000393479	0.00023379
Bradyrhizobium_diazoefficiens	8.28e-05	5.97e-05	5.78e-05	3.35e-05	7.42e-05	6.93e-05	9.01e-05	4.62e-05	5.43e-05	4.91e-05	9.5e-05	5.91e-05	2.53e-05	0.000151218	4.43e-05	1.58e-05	2.2e-05	0.000106381	3.97e-05	7.57e-05	7.47e-05	4.1e-05	7.33e-05	1.11e-05	5.56e-05	6.52e-05	2.23e-05	3.64e-05	6.38e-05	5.23e-05	4.07e-05	4.79e-05	6.24e-05	4.09e-05	5.99e-05	0.000176247	2.78e-05	6.51e-05	2.15e-05	8.63e-05	5.36e-05	7.94e-05	5.76e-05	3.74e-05	4.7e-05	6.21e-05	0.000125372	0.000100739
Bradyrhizobium_japonicum	8.37e-05	3.57e-05	4.67e-05	2.11e-05	8.81e-05	4.22e-05	5.79e-05	3.66e-05	3.98e-05	3e-05	3.87e-05	4.02e-05	2.02e-05	7.78e-05	5.02e-05	1.47e-05	5.53e-05	9.34e-05	2.91e-05	3.42e-05	3.62e-05	3.99e-05	6.11e-05	2.36e-05	4.17e-05	3.98e-05	2.11e-05	5.73e-05	6.74e-05	3.4e-05	2.5e-05	3.65e-05	6.75e-05	3.46e-05	4.43e-05	0.000110832	1.69e-05	2.91e-05	2.72e-05	4.01e-05	1.68e-05	4.68e-05	2.57e-05	3.54e-05	4.08e-05	5.32e-05	0.000127196	6.15e-05
Bradyrhizobium_oligotrophicum	4.14e-05	2.92e-05	2.92e-05	3.4e-05	6.22e-05	3.55e-05	0.000104451	5.03e-05	0.000111174	3.6e-05	6.57e-05	2.74e-05	2.42e-05	8.27e-05	1.72e-05	3.65e-05	1.81e-05	4.82e-05	3.43e-05	4.23e-05	3.99e-05	2.53e-05	7.12e-05	1.3e-05	4.38e-05	4.93e-05	2.01e-05	4.05e-05	4.06e-05	2.71e-05	3.65e-05	4.3e-05	3.1e-05	3.71e-05	4.82e-05	8.08e-05	1.92e-05	2.33e-05	1.41e-05	4.59e-05	7.36e-05	2.74e-05	4.37e-05	1.72e-05	3.62e-05	4.02e-05	5.46e-05	3.78e-05
Bradyrhizobium_sp._BTAi1	7.74e-05	5.03e-05	4.39e-05	3.97e-05	7.61e-05	4.61e-05	7.33e-05	4.73e-05	6.35e-05	4.05e-05	7.56e-05	5.14e-05	4.85e-05	0.000108013	2.18e-05	3.32e-05	4.15e-05	6.78e-05	5.28e-05	5.26e-05	3.27e-05	5.19e-05	7.03e-05	4.01e-05	5.89e-05	6.03e-05	2.77e-05	5.94e-05	6.98e-05	5.89e-05	4.04e-05	5.33e-05	4.99e-05	3.23e-05	6.52e-05	0.000168113	2.38e-05	3.56e-05	1.98e-05	7.09e-05	4.87e-05	5.32e-05	9.11e-05	3.78e-05	7.53e-05	5.16e-05	0.000103103	8.36e-05
Bradyrhizobium_sp._ORS_278	8.6e-05	4.91e-05	5.65e-05	5.86e-05	0.000129437	8.56e-05	0.000162864	0.000106934	0.000166762	7.67e-05	6.52e-05	9.1e-05	3.55e-05	0.000134553	2.71e-05	1.25e-05	2.87e-05	0.000113979	2.65e-05	9.44e-05	5e-05	7.01e-05	9.06e-05	3.22e-05	8e-05	6.09e-05	5.99e-05	7.97e-05	0.000127218	5.45e-05	6.14e-05	8.13e-05	8.85e-05	8.46e-05	8.26e-05	0.000252338	1.65e-05	5.12e-05	7.97e-06	7.24e-05	3.03e-05	8.13e-05	7.46e-05	2.24e-05	6.87e-05	0.000144863	0.000174062	9.24e-05
Bradyrhizobium_sp._S23321	0.000176966	3.59e-05	6.98e-05	2.49e-05	0.000152214	5.86e-05	0.000112866	7.97e-05	8.21e-05	5.06e-05	6.35e-05	7.02e-05	2.72e-05	0.000120357	4.86e-05	2.67e-05	2.93e-05	0.000117579	7.78e-05	0.000123831	6.92e-05	8.11e-05	0.000157151	2.55e-05	4.66e-05	6.04e-05	2.54e-05	0.000100669	0.000128086	7.46e-05	3.59e-05	5.69e-05	7.68e-05	4.74e-05	5.17e-05	0.000224884	2.83e-05	3.73e-05	8.81e-06	0.000102	9.31e-05	6.03e-05	3.64e-05	3.91e-05	6.19e-05	8.58e-05	0.000182806	0.000109054
Brevibacillus_brevis	0.000212991	0.000131736	0.000176753	0.000106985	0.000236098	0.000150074	0.000454435	0.000278193	0.000273788	0.000215529	0.000411916	0.000203841	0.000180299	0.000575862	0.000166765	0.000478103	0.000331138	0.000254954	0.00032159	0.000201754	0.000185904	0.000223401	0.000331165	0.000146994	0.00019762	0.000183456	9.43e-05	0.000153101	0.000130284	0.000119367	0.000159771	0.000170699	0.000179801	0.000154567	0.000236941	0.000371474	0.000188691	0.000221116	6.16e-05	0.000342907	0.000338673	0.000361854	0.000192647	0.000188066	0.000125144	0.000170223	0.000390208	0.000368504
Brevundimonas_subvibrioides	0.000130512	4.32e-05	6.7e-05	5.24e-05	0.000142214	0.000110037	0.000373746	0.000167136	0.000330205	4.99e-05	0.000141907	8.53e-05	3.99e-05	0.000480194	3.6e-05	6.59e-05	4.67e-05	9.9e-05	3.26e-05	0.000116784	5.58e-05	4.8e-05	0.000184085	3.05e-05	4.35e-05	9.63e-05	3.86e-05	7.27e-05	0.000147177	4.94e-05	0.000198147	9.18e-05	0.00012157	6.33e-05	0.000123339	0.000298603	3.06e-05	5.32e-05	1.55e-05	9.44e-05	4.33e-05	0.000114729	6.36e-05	4.37e-05	0.000247683	0.000127059	0.000145313	0.000102402
Brucella_abortus	0	0	0	0	0	0	0	0	0	0	0	0	0	0	0	0	0	0	0	0	0	0	0	0	0	0	0	0	0	0	0	0	0	0	0	0	0	0	0	0	0	0	0	0	0	0	0	0
Brucella_canis	0	0	0	0	0	0	0	0	0	0	0	0	0	0	0	0	0	0	0	0	0	0	0	0	0	0	0	0	0	0	2.11e-07	0	0	0	0	0	0	0	0	0	0	0	0	0	0	0	0	0
Brucella_melitensis	0	1.33e-07	0	0	0	0	0	3.02e-06	0	1.92e-06	0	4.76e-07	0	2.47e-06	0	0	0	0	0	0	4.12e-07	0	0	0	0	0	1.76e-07	0	2.31e-07	0	2.37e-06	3.34e-07	3.63e-06	1.81e-07	1.09e-06	6.61e-06	0	0	2.17e-06	0	0	0	0	0	7.44e-07	3.84e-07	2.52e-07	4.75e-07
Brucella_microti	0	0	0	0	0	0	0	0	0	0	0	0	0	0	0	0	0	0	0	0	0	0	0	5.48e-07	0	0	0	0	0	0	0	0	0	0	0	0	0	0	0	0	0	0	0	0	0	0	2.52e-07	2.85e-06
Brucella_ovis	0	1.6e-06	1.19e-06	0	0	0	9.9e-06	0	0	0	0	0	0	6.17e-06	0	0	0	3.6e-06	0	8.05e-07	0	2.23e-06	0	0	0	2.53e-07	0	0	0	0	1.62e-06	0	0	0	0	0	6.75e-07	0	0	0	0	1.25e-06	0	1.1e-06	0	0	1.64e-06	0
Brucella_pinnipedialis	0	0	0	0	0	0	0	0	0	0	0	0	0	0	0	0	0	0	0	0	0	0	0	0	0	0	0	0	0	0	0	0	0	0	1.41e-07	0	0	0	0	0	0	0	0	0	0	0	0	0
Brucella_suis	0	3.33e-07	0	0	0	0	0	0	1.66e-06	0	0	6.67e-06	0	0	1.54e-06	0	8.31e-07	0	0	0	0	0	0	0	0	0	0	0	0	0	0	0	0	0	0	1.02e-06	2.36e-06	3.15e-06	0	2.91e-06	5.41e-06	0	0	0	0	0	7.55e-07	2.85e-06
Buchnera_aphidicola	0.00031917	4.83e-05	0.00022902	0.00015703	0.000289429	0.000244211	0.000431664	0.000425537	0.000532227	0.00020546	0.000301482	0.000198602	7.57e-05	0.000310459	0.000313223	0.000592455	0.000484243	0.000308544	0.000251069	0.000254105	0.000254871	0.000312802	0.000317113	0.000228505	0.000234848	0.000121882	0.000167821	0.000355838	0.000234072	0.000225505	0.000168268	9.86e-05	0.000211028	0.000110289	0.000250544	0.000488069	9.71e-05	8.71e-05	4.73e-05	0.000328668	0.000529109	0.000133851	0.000130746	0.000106051	7.91e-05	0.000175987	0.000390774	0.000152296
Burkholderia_ambifaria	0.000204143	3.21e-05	6.77e-05	5.46e-05	0.000134993	9.81e-05	5.45e-05	4.76e-05	9.79e-05	4.58e-05	9.66e-05	0.000119066	3.28e-05	5.49e-05	8.98e-05	3.76e-05	1.62e-05	0.000119778	3.14e-05	0.000196116	4.74e-05	7.32e-05	5.67e-05	2.01e-05	2.09e-05	2.42e-05	6.44e-05	6.99e-06	0.00015302	5.7e-05	2.84e-05	7.34e-05	0.000121079	4.04e-05	2.47e-05	7.15e-05	2.37e-05	3.08e-05	3.62e-06	2.67e-05	6.06e-05	6.92e-05	4.48e-05	4.07e-05	4.9e-05	0.000142429	0.000205892	0.000109292
Burkholderia_cenocepacia	0.000236692	7.69e-05	0.000103775	7.66e-05	0.000231376	7.96e-05	8.51e-05	7.83e-05	0.000107856	7.19e-05	0.000129759	7.36e-05	4.34e-05	0.000118505	6.62e-05	3.32e-05	3.45e-05	0.000204163	5.41e-05	7.23e-05	9.55e-05	0.000104605	0.000189237	3e-05	6.24e-05	5.76e-05	6.12e-05	4.33e-05	0.000144979	6.93e-05	4.56e-05	7.35e-05	7.81e-05	6.77e-05	6.25e-05	0.000236578	2.5e-05	2.13e-05	1.16e-05	5.09e-05	8.01e-05	8.06e-05	6.51e-05	6.07e-05	6.09e-05	9.84e-05	0.00017532	0.00013614
Burkholderia_cepacia	5.09e-05	1.54e-05	7.37e-06	1.53e-05	5.06e-05	2.44e-05	0.000113361	3e-05	0.0001	1.15e-05	5.41e-05	2.14e-06	6.93e-06	0.000161093	1.29e-05	1.2e-05	1.54e-05	2.56e-05	1.37e-05	1.37e-05	2.39e-05	9.12e-06	2.04e-05	1.36e-05	1.2e-05	1.17e-05	2.11e-06	1.68e-05	3e-05	5.04e-06	7.28e-05	2.23e-05	2.72e-05	2.06e-05	2.89e-05	8.91e-05	7.93e-06	2.06e-05	1.69e-06	4.88e-05	7.57e-06	4.03e-05	2.05e-05	4.77e-06	7.08e-05	4.48e-06	2.62e-05	7.84e-06
Burkholderia_gladioli	4.46e-05	7.28e-05	5.17e-05	3.59e-05	6.11e-05	8.1e-05	7.72e-05	0.000133049	0.000149339	8.03e-05	0.000111537	8.33e-05	4.98e-05	0.000109247	1.78e-05	3.27e-06	2.08e-05	0.00010978	1.92e-05	4.45e-05	4.65e-05	4.26e-05	6.6e-05	1.1e-05	5.73e-05	0.000100597	5.95e-05	6.64e-05	0.000115416	6.33e-05	5.44e-05	0.000101079	6.88e-05	9.34e-05	0.00011079	0.000131677	1.75e-05	3.46e-05	1.01e-05	0.000106359	5.36e-05	7.3e-05	8.01e-05	4.18e-05	7.91e-05	0.00014102	9.86e-05	7.46e-05
Burkholderia_glumae	0.000108391	2.58e-05	5.17e-05	2.36e-05	0.000113883	3.57e-05	5e-05	4.56e-05	2.9e-05	4.51e-05	8.89e-05	4.93e-05	3.04e-05	0.000129615	2.12e-05	3.1e-05	3.68e-05	0.000149973	6e-05	7.25e-05	5.68e-05	5.49e-05	0.000111013	1.73e-05	3.1e-05	2.71e-05	2.8e-05	4.68e-05	5.03e-05	2.93e-05	3.35e-05	5.49e-05	4.33e-05	2.66e-05	4.01e-05	0.00014354	2.28e-05	3.6e-05	9.9e-06	4.62e-05	5.57e-05	4.05e-05	2.69e-05	3.49e-05	5.1e-05	4.55e-05	8.92e-05	9.81e-05
Burkholderia_lata	4.01e-05	2.56e-05	7.21e-05	1.27e-05	7.14e-05	5.02e-05	2.48e-05	6.93e-05	9.08e-05	3.14e-05	9.83e-05	4.17e-05	2.55e-05	7.47e-05	3.51e-05	2.18e-05	2.93e-05	0.000107581	4.51e-06	8.28e-05	2.35e-05	3.26e-05	9.93e-05	1.62e-05	3.15e-05	4.03e-05	2.49e-05	2.52e-05	7.68e-05	4.54e-05	2.22e-05	5.04e-05	6.35e-05	4.68e-05	4.23e-05	0.000139303	1.09e-05	2.37e-05	6.64e-06	3.49e-05	8.76e-05	3.03e-05	2.29e-05	3.58e-05	3.18e-05	9.27e-05	9.71e-05	9.27e-05
Burkholderia_mallei	4.58e-05	1.26e-05	2.96e-05	1.82e-05	4.69e-05	2.91e-05	4.65e-05	3.3e-05	3.9e-05	1.05e-05	4.03e-05	4.07e-05	2.24e-05	4.88e-05	3.26e-05	2.45e-05	6.21e-05	7.36e-05	4.71e-05	2.74e-05	4.57e-05	2.55e-05	6.49e-05	2.03e-05	1.2e-05	2.04e-05	2.08e-05	7.06e-05	3.45e-05	4.79e-05	2.74e-05	2.25e-05	2.83e-05	1.83e-05	2.4e-05	8.54e-05	1.38e-05	1.03e-05	7.61e-06	1.98e-05	5.52e-05	3.16e-05	3.01e-05	2.24e-05	1.58e-05	2.36e-05	5.53e-05	5.3e-05
Burkholderia_multivorans	2.81e-05	2e-05	0.000105401	2.27e-05	0.000122216	6.98e-05	4.41e-05	9.51e-05	7.88e-05	2.13e-05	1.77e-05	7.12e-05	4.69e-05	0.000132084	5.11e-05	8.71e-06	1.89e-05	0.000203163	2.72e-05	0.000120005	3.91e-05	5.49e-05	0.000169095	1.9e-05	2.83e-05	3.47e-05	4.65e-05	1.05e-05	0.0002026	5.95e-05	2.96e-05	6.25e-05	0.000111652	4.84e-05	3.61e-05	0.000252677	2e-05	2.09e-05	3.26e-06	2.53e-05	1.57e-05	4.63e-05	3.41e-05	3.74e-05	5.4e-05	0.000132567	0.000214447	0.00017653
Burkholderia_phenoliruptrix	0.000130512	2.17e-05	0.000117438	6.77e-05	0.000167491	8.72e-05	0.000105936	9.68e-05	8.42e-05	6.83e-05	0.000120924	5.88e-05	4.47e-05	0.000120974	1.57e-05	0.000115986	2.53e-05	0.000282549	2.25e-05	6.18e-05	9.92e-05	3.97e-05	0.000152467	2.21e-05	3.88e-05	1.98e-05	6.2e-05	2.8e-05	0.000181831	0.000119682	4.25e-05	0.000115003	0.000151815	7.8e-05	3.55e-05	2.34e-05	1.77e-05	1.09e-05	4.71e-06	3.14e-05	1.62e-05	3.72e-05	1.3e-05	6.79e-05	6.87e-05	0.000135897	0.000227532	0.000139229
Burkholderia_phymatum	4.61e-05	2.65e-05	2.75e-05	6.5e-05	5.14e-05	5.64e-05	7.18e-05	4.95e-05	2.61e-05	2.33e-05	2.98e-05	2.6e-05	1.7e-05	0.000117271	4.03e-05	2.83e-05	0.000117373	7.88e-05	7.09e-05	3.81e-05	1.83e-05	2.41e-05	4.66e-05	1.34e-05	1.96e-05	4.5e-05	2.02e-05	2.45e-05	3.03e-05	1.61e-05	2.79e-05	4.27e-05	3.18e-05	2.84e-05	4.82e-05	8.54e-05	2.42e-05	3.8e-05	6.88e-06	4.91e-05	9.47e-05	5.28e-05	2.34e-05	3.67e-05	1.86e-05	2.65e-05	5.94e-05	4.4e-05
Burkholderia_phytofirmans	3.13e-05	1.04e-05	2.05e-05	1.99e-06	2.56e-05	1.48e-05	3.07e-05	3.3e-06	2.65e-05	6.47e-06	2.21e-05	1.64e-05	2.55e-06	3.89e-05	1.23e-05	1.03e-05	2.76e-05	6.36e-05	2.5e-05	2.3e-05	5.15e-06	1.5e-05	3.98e-05	7.67e-06	1.47e-05	2.71e-05	7.93e-06	1.05e-05	1.64e-05	1.07e-05	1.87e-05	9.54e-06	1.69e-05	5.34e-06	2.58e-05	3.97e-05	8.02e-06	3.63e-06	5.31e-06	3.6e-05	3.46e-05	1.08e-05	1.71e-05	7.71e-06	1.44e-05	6.79e-06	3.49e-05	1.59e-05
Burkholderia_pseudomallei	2.24e-05	1.78e-05	2.82e-05	2.82e-06	2.5e-05	1.46e-05	2.23e-05	9.9e-06	7.88e-06	2.11e-05	7.73e-06	1.33e-05	1.29e-05	2.84e-05	1.05e-05	2.5e-05	2.45e-05	7.2e-05	3.69e-05	1.83e-05	1.28e-05	4.46e-06	8.83e-05	1.33e-05	1.58e-05	4.78e-05	2.08e-05	6.22e-05	2.75e-05	1.89e-05	2e-05	1.63e-05	1.16e-05	2.03e-05	1.19e-05	0.000105409	1.02e-05	3.24e-06	3.26e-06	3.02e-05	1.14e-05	1.18e-05	1.21e-05	1.19e-05	3.55e-05	1.45e-05	3.08e-05	2.19e-05
Burkholderia_rhizoxinica	2.53e-05	1.67e-05	1.7e-05	7.84e-06	1.89e-05	9.95e-06	3.86e-05	1.15e-05	2.99e-05	1.27e-05	1.99e-05	1.31e-05	1e-05	2.16e-05	1.35e-05	1.63e-06	2.6e-05	3.52e-05	1.39e-05	1.55e-05	1.59e-05	1.24e-05	2.72e-05	3.01e-06	1e-05	2.74e-05	9.69e-06	3.15e-05	2.08e-05	1.01e-05	1.46e-05	2.23e-05	2.16e-05	1.66e-05	2.94e-05	4.69e-05	8.1e-06	2.12e-05	2.2e-05	4.74e-05	3.46e-05	1.35e-05	2.08e-05	1.19e-05	1.36e-05	1.17e-05	3.47e-05	2.07e-05
Burkholderia_sp._CCGE1001	1.86e-05	4.09e-06	3.07e-05	6.9e-06	2.75e-05	2.2e-05	4.95e-06	3.93e-05	4.52e-05	6.23e-06	2.21e-06	2.24e-05	5.47e-06	5.93e-05	1.85e-05	7.62e-06	5.4e-06	6.74e-05	7.97e-06	5.72e-05	2.04e-05	7.91e-06	5.36e-05	6.16e-06	1.25e-05	1.37e-05	1.37e-05	2.59e-05	5.92e-05	3.12e-05	1.02e-05	1.83e-05	3.74e-05	1.72e-05	1.63e-05	0.000146421	3.8e-06	8.97e-06	0	1.22e-05	1.46e-05	5.82e-06	1.3e-05	1.67e-05	1.34e-05	4.55e-05	6.79e-05	5.58e-05
Burkholderia_sp._CCGE1002	6.98e-05	3.26e-05	3.43e-05	2.59e-05	7.17e-05	4.04e-05	0.000100986	4.12e-05	0.000105367	3.52e-05	5.41e-05	3.88e-05	3.63e-05	0.00015739	3.57e-05	3.98e-05	5.73e-05	0.0001	4.35e-05	3.87e-05	5.56e-05	1.64e-05	9.18e-05	1.49e-05	1.87e-05	3.59e-05	2.86e-05	2.52e-05	5.8e-05	3.75e-05	5.13e-05	4.35e-05	4.74e-05	3.73e-05	5.13e-05	8.54e-05	2.34e-05	2.64e-05	8.21e-06	5.58e-05	3.9e-05	4.22e-05	2.83e-05	2.35e-05	4.74e-05	4.29e-05	8.57e-05	7.29e-05
Burkholderia_sp._CCGE1003	9.1e-05	1.84e-05	2.75e-05	4.43e-05	5.25e-05	4.67e-05	2.43e-05	3.41e-05	3.44e-05	2.4e-05	7.07e-05	3.6e-05	2.44e-05	5.93e-05	3.32e-05	1.69e-05	2.85e-05	7.68e-05	2.04e-05	5.15e-05	4.94e-05	3.71e-05	4.45e-05	1.15e-05	1.57e-05	4.36e-05	2.05e-05	5.73e-05	4.34e-05	2.93e-05	3.27e-05	3.81e-05	3.46e-05	1.8e-05	5.69e-05	0.000153877	1.55e-05	1.22e-05	3.98e-06	6.13e-05	4.22e-05	4.28e-05	1.5e-05	6.61e-06	2.26e-05	2.86e-05	8.12e-05	5.92e-05
Burkholderia_sp._KJ006	9.48e-06	1.23e-06	1.3e-06	2.09e-07	7.22e-06	1.46e-06	1.98e-06	2.2e-06	1.66e-06	2.64e-06	0	1.43e-06	0	2.47e-06	0	4.36e-06	3.12e-06	3.4e-06	6.93e-07	5.03e-06	4.12e-07	0	9.37e-07	1.1e-06	5.07e-06	2.03e-06	2.47e-06	0	1.04e-06	4.41e-06	3.54e-06	2.61e-06	2.95e-06	1.72e-06	4.67e-06	1.1e-05	1.27e-06	1.26e-05	9.66e-07	4.07e-06	1.19e-05	3.95e-06	4.05e-06	7.16e-06	1.61e-06	1.92e-06	4.15e-06	0
Burkholderia_sp._RPE64	8.28e-05	3.31e-05	8.87e-05	2.52e-05	0.00010805	8.62e-05	3.86e-05	0.000100611	6.72e-05	3.5e-05	6.02e-05	8.53e-05	4.81e-05	0.000140725	3.78e-05	2.34e-05	2.89e-05	0.000176168	3.15e-05	0.000133496	6.22e-05	6.06e-05	0.000139352	2.53e-05	2.92e-05	3.33e-05	5.75e-05	3.01e-05	0.000166905	6.8e-05	4.01e-05	6.62e-05	0.000101144	5.84e-05	6.32e-05	0.000289791	1.29e-05	1.8e-05	1.35e-05	6.25e-05	4.22e-05	6.4e-05	3.93e-05	3.14e-05	5.49e-05	0.000123345	0.000212183	0.000152296
Burkholderia_sp._YI23	0.000295786	8.46e-05	0.000143029	0.000153478	0.00021721	0.000142852	0.000278206	0.000142945	0.000237697	7.77e-05	0.000291543	0.000121685	5.71e-05	0.000205533	0.00014215	3.59e-05	6.69e-05	0.000463717	7.38e-05	0.000189673	0.000174581	0.000129338	0.000285495	3.89e-05	0.000116752	7.25e-05	6.78e-05	8.67e-05	0.000223138	0.000118422	8.5e-05	0.00012087	0.000121766	0.000116084	9.57e-05	0.000305721	6.24e-05	4.35e-05	1.49e-05	0.000124086	0.000115235	8.83e-05	0.000147233	7.3e-05	9.84e-05	0.000176755	0.000321262	0.000230701
Burkholderia_thailandensis	8.03e-05	4.8e-05	4.03e-05	7.22e-05	9.72e-05	6.85e-05	0.000155439	5.91e-05	7.01e-05	0.000112679	0.000110433	3.93e-05	2.53e-05	0.000125295	2.37e-05	2.72e-05	7.29e-05	0.000210162	6.45e-05	6.42e-05	5.91e-05	5.07e-05	6.82e-05	1.36e-05	7.51e-05	8.01e-05	9.55e-05	4.19e-05	0.000147409	4.06e-05	6.02e-05	0.000108741	3.37e-05	6.36e-05	7.61e-05	0.000101003	3e-05	3.46e-05	1.06e-05	8.95e-05	5.19e-05	8.19e-05	2.83e-05	4.81e-05	4.6e-05	6.3e-05	0.0001026	0.000108579
Burkholderia_vietnamiensis	0	1.06e-06	6.51e-07	4.18e-07	2.78e-06	1.01e-06	0	0	0	1.92e-06	0	9.53e-07	2.19e-06	5.55e-06	0	1.09e-05	0	0	0	1.11e-05	1.24e-06	2.43e-06	9.37e-07	0	0	7.6e-07	0	5.59e-06	3.88e-06	0	1.9e-06	3.49e-06	1.87e-06	1.99e-06	3.13e-06	4.75e-06	0	1.15e-06	0	0	0	1.25e-06	0	0	0	4.1e-06	5.16e-06	1.43e-06
Burkholderia_xenovorans	0.00019719	6.65e-05	8.98e-05	4.51e-05	0.0001986	0.000105413	0.000157419	0.000116555	0.000143116	5.3e-05	0.00016565	0.000107635	8.35e-05	0.000301818	7.32e-05	8.88e-05	7.33e-05	0.00016637	8.52e-05	0.000124838	0.000109525	7.74e-05	0.000170266	3.66e-05	6.48e-05	7.58e-05	7.9e-05	5.38e-05	0.000158632	5.86e-05	7.38e-05	7.98e-05	8.51e-05	8.48e-05	9.64e-05	0.000241831	4.07e-05	9.59e-05	4.01e-05	0.00013077	0.000134171	0.000123458	0.00010558	6.7e-05	8.48e-05	0.000117709	0.000218599	0.000145644
butyrate-producing_bacterium_SM4/1	0.000393749	0.000355778	0.000968672	0.000285642	0.0122485	0.00121637	0.00115539	0.000552263	0.000506507	0.000499625	0.000822175	0.000841557	0.00867293	0.0018893	0.000509525	0.00228269	0.0011542	0.000580695	0.00068927	0.000415588	0.00183516	0.000774607	0.00107968	0.00209422	0.00189471	0.000569626	0.000290978	0.000828424	0.000540576	0.0111461	0.00523225	0.000504646	0.000688174	0.000474929	0.00102949	0.00164689	0.000476368	0.0015313	0.000469478	0.00976384	0.00104956	0.00286469	0.000845508	0.00301347	0.000545844	0.000530651	0.00142936	0.00090356
butyrate-producing_bacterium_SS3/4	0.00306941	0.00634577	0.0043233	0.0073589	0.00984307	0.00993909	0.00741997	0.00538711	0.00347586	0.00473301	0.00675685	0.00463309	0.00532072	0.016213	0.0116794	0.00576664	0.00616947	0.00360135	0.00341325	0.00244521	0.00318363	0.00264453	0.0105486	0.00128295	0.00448848	0.00484816	0.00640406	0.0293255	0.00523648	0.00362289	0.0139403	0.0186065	0.00858833	0.00771676	0.0141231	0.0109682	0.00293534	0.0328396	0.00584831	0.00822599	0.00603769	0.00673929	0.00527119	0.0116183	0.0054964	0.00792966	0.00856104	0.00305566
butyrate-producing_bacterium_SSC/2	0.00107728	0.00975192	0.00102853	0.00217293	0.00144131	0.000903865	0.00258355	0.000898355	0.00146062	0.0131164	0.00180282	0.0233502	0.00190344	0.00173561	0.00122181	0.00353023	0.00248624	0.00147054	0.00180132	0.00110018	0.00140591	0.00152914	0.000799105	0.000810865	0.00188178	0.0111643	0.0046552	0.00166244	0.00167744	0.00148248	0.000894973	0.00310996	0.00516268	0.00355079	0.00588131	0.00188889	0.000705734	0.00107428	0.0264069	0.00121325	0.00344191	0.00145718	0.00493681	0.00501761	0.00229798	0.000680124	0.00256928	0.0123847
Butyrivibrio_fibrisolvens	0.000454739	0.000224641	0.000318589	0.000178553	0.00033026	0.000297614	0.0011653	0.000379354	0.000472906	0.000727861	0.000961872	0.000423398	0.00102163	0.000522781	0.000307684	0.0012459	0.000632985	0.000338939	0.00041221	0.000482034	0.000547212	0.000201913	0.000331867	0.000205079	0.000561733	0.000213103	0.000504343	0.000579547	0.00041949	0.000458569	0.000415964	0.000825691	0.00120548	0.00134927	0.000804214	0.000688211	0.000249281	0.00021873	0.000657849	0.000297864	0.00141258	0.00060212	0.000289839	0.000777769	0.000499086	0.000224787	0.000636171	0.000371118
Butyrivibrio_proteoclasticus	0.000352983	0.000390052	0.00067318	0.000271433	0.000890785	0.00052396	0.00117965	0.000514603	0.000932123	0.000944828	0.00117611	0.000766307	0.000741066	0.000971497	0.000561524	0.00195924	0.000949373	0.000571497	0.000705904	0.000520895	0.000666001	0.000447816	0.000587853	0.000410296	0.000601443	0.000392885	0.00067331	0.00056976	0.00058518	0.000759663	0.000484689	0.00125191	0.00153622	0.00145748	0.00110702	0.000682279	0.000390715	0.000411121	0.000458127	0.000553301	0.00167227	0.000817445	0.000547859	0.00134821	0.000596076	0.000352999	0.00134557	0.000368504
Caldanaerobacter_subterraneus	0.000104599	3.58e-05	0.000108004	0.000206866	0.000227765	8.39e-05	0.000266325	8.14e-05	9.17e-05	5.8e-05	9e-05	5.02e-05	2.22e-05	0.000103692	9.97e-05	0.000124154	8.43e-05	0.000143774	7.59e-05	9.97e-05	0.000183639	6.85e-05	0.000122489	9.12e-05	0.000129471	5.23e-05	3.81e-05	8.32e-05	3.6e-05	0.000107398	0.000106467	6.66e-05	7.92e-05	4.46e-05	9.8e-05	0.000159809	5.74e-05	6.3e-05	3.74e-05	0.000115949	0.000163385	0.000129694	6.71e-05	7.69e-05	7.55e-05	3.96e-05	0.000168086	6.49e-05
Caldicellulosiruptor_bescii	6.19e-05	1.33e-05	3.16e-05	1.74e-05	4.97e-05	3.15e-05	0.000104451	6.52e-05	7.3e-05	5.11e-05	5.85e-05	4.21e-05	2.94e-05	8.52e-05	4.98e-05	9.47e-05	8.46e-05	5.24e-05	4e-05	3.3e-05	4.92e-05	4.6e-05	5.34e-05	3.49e-05	2.62e-05	2.57e-05	2.82e-05	6.85e-05	3.9e-05	5.13e-05	3.53e-05	2.24e-05	4.17e-05	3.14e-05	4.13e-05	9.15e-05	2.28e-05	2.62e-05	1.81e-05	5.41e-05	7.95e-05	3.43e-05	3.07e-05	2.42e-05	2.68e-05	2.07e-05	6.81e-05	4.94e-05
Caldicellulosiruptor_hydrothermalis	2.15e-05	5.76e-06	4.34e-06	8.25e-06	5.28e-06	9.44e-06	3.96e-05	3.13e-05	0	8.87e-06	4.25e-05	1.12e-05	6.02e-06	2.84e-05	2.15e-05	4.08e-05	1.02e-05	7e-06	2.41e-05	6.44e-06	1.81e-05	2.25e-05	2.41e-05	1.07e-05	2.1e-05	3.42e-06	1.59e-06	5.59e-06	4.11e-06	7.02e-05	8.78e-06	8.16e-06	9.03e-06	8.6e-06	1.89e-05	1.41e-05	6.75e-06	5.73e-06	8.45e-07	8.43e-06	2.54e-05	1.02e-05	6.94e-06	4.22e-06	9.3e-06	7.17e-06	1.4e-05	1.38e-05
Caldicellulosiruptor_kristjanssonii	1.26e-06	2.66e-07	3.25e-06	5.85e-06	2.22e-06	1.2e-06	0	4.4e-06	0	2.28e-05	3.31e-06	0	0	0	2.77e-06	1.47e-05	8.31e-07	0	4.33e-06	8.05e-07	0	3.65e-06	6.09e-06	0	6.2e-07	7.6e-07	3.52e-07	0	0	0	6.57e-07	4.45e-06	6.38e-06	1.27e-06	6.99e-06	6.61e-06	1.69e-07	3.82e-07	4.83e-07	0	0	1.25e-06	0	0	1.74e-06	1.92e-06	2.08e-06	0
Caldicellulosiruptor_kronotskyensis	6.32e-06	2.8e-06	4.34e-06	1.12e-05	1.83e-05	4.41e-05	3.66e-05	2.03e-05	8.34e-05	4.32e-06	4.97e-06	6.67e-06	9.48e-06	3.02e-05	2.12e-05	1.25e-05	4.34e-05	7.4e-06	2.41e-05	4.23e-06	1.96e-05	5.88e-06	1.8e-05	9.18e-06	3.1e-06	9.12e-06	9.25e-06	1.82e-05	8.5e-06	3.46e-06	7.02e-06	1.5e-05	2.36e-05	9.24e-06	9.07e-06	1.95e-05	4.56e-06	8.97e-06	4.83e-07	9.88e-06	2.54e-05	1.56e-05	7.52e-06	1.01e-05	1.86e-05	8.58e-06	3.07e-05	1.43e-05
Caldicellulosiruptor_lactoaceticus	0	1.06e-06	8.68e-07	0	0	0	0	1.1e-06	0	0	0	0	0	0	0	3.27e-06	0	0	3.64e-06	2.42e-06	0	1.01e-05	0	0	0	0	8.81e-07	4.19e-06	0	0	4.48e-06	5.22e-07	1.81e-05	1.81e-07	1.99e-05	0	0	3.63e-06	0	4.65e-06	4.33e-06	8.31e-07	2.31e-06	3.67e-07	0	2.56e-07	9.06e-06	0
Caldicellulosiruptor_obsidiansis	2.18e-05	4.99e-06	6.07e-06	9.93e-06	2.08e-05	1.89e-05	0	1.29e-05	5.31e-05	1.37e-05	1.99e-05	4.29e-06	5.29e-06	6.17e-06	3.82e-05	4.36e-05	4.22e-05	2e-06	1.44e-05	2.01e-06	7.41e-06	1.05e-05	3.98e-06	3.7e-06	1.42e-05	1.01e-06	4.4e-06	3.5e-06	1.03e-05	4.28e-05	2.09e-05	7.52e-06	2.29e-05	9.87e-06	1.4e-05	2.03e-05	1.01e-06	1.91e-07	3.02e-06	3.49e-06	3.79e-05	1.21e-05	1.62e-05	6.24e-06	4.46e-06	4.35e-06	1.23e-05	8.08e-06
Caldicellulosiruptor_owensensis	2.65e-05	3.76e-06	1.34e-05	1.09e-05	1.19e-05	2.72e-05	8.91e-06	2.53e-05	5.14e-05	2.13e-05	8.28e-06	7.14e-06	5.83e-06	9.88e-06	2.65e-05	2.34e-05	2.85e-05	3e-06	1.3e-05	1.01e-06	3.91e-06	1.93e-05	1.55e-05	6.71e-06	2.07e-05	1.52e-06	4.85e-06	5.59e-06	1.18e-05	3.28e-05	1.49e-05	1.78e-05	2.61e-05	1.77e-05	2.08e-05	3.97e-05	3.8e-06	3.82e-06	5.68e-06	1.22e-05	6.49e-06	1.21e-05	5.5e-06	3.3e-06	1.76e-05	4.1e-06	2.5e-05	9.03e-06
Caldicellulosiruptor_saccharolyticus	5.47e-05	9.88e-06	2.27e-05	1.56e-05	2.19e-05	1.62e-05	5.59e-05	4.01e-05	2.16e-05	2.78e-05	2.15e-05	2.07e-05	2.06e-05	3.21e-05	5.14e-05	5.83e-05	6.09e-05	2.86e-05	2.67e-05	1.53e-05	2.16e-05	2.78e-05	2.76e-05	1.3e-05	1.79e-05	1.28e-05	2.6e-05	4.4e-05	3.26e-05	2.83e-05	2.1e-05	1.84e-05	3.16e-05	1.97e-05	3.1e-05	4.3e-05	1.45e-05	1.11e-05	1.51e-05	1.45e-05	9.79e-05	1.18e-05	2.75e-05	2.57e-05	1.22e-05	2.05e-05	2.83e-05	2.64e-05
Caldilinea_aerophila	0.0002408	7.37e-05	0.000240623	4.79e-05	0.000233876	0.000176934	0.000367806	0.000236134	0.000395333	0.000216488	0.000366086	0.000124543	7.57e-05	0.000372798	0.000101228	0.000266823	0.000418597	0.000254554	0.000254361	0.00018041	0.000131759	0.000272055	0.00018104	0.000113842	0.000158323	0.000114913	6.28e-05	8.95e-05	0.000215848	0.000117162	0.000235092	0.000103668	0.00012373	0.000237419	0.000175113	0.000492983	0.000159746	8.04e-05	5.26e-05	0.000317916	0.000236963	0.000264168	0.000256285	0.000175406	0.000119066	0.000120911	0.000391529	0.000213832
Caldisericum_exile	7.77e-05	2.58e-05	3.13e-05	1.82e-05	6.94e-05	5.37e-05	9.6e-05	8e-05	6.76e-05	4.84e-05	8.95e-05	3.6e-05	0.000162433	9.75e-05	0.000129843	0.000179697	3.28e-05	3.2e-05	3.14e-05	4.15e-05	4.63e-05	5.35e-05	9.91e-05	2.55e-05	4.96e-05	7.32e-05	0.000125623	5.73e-05	5.79e-05	7.5e-05	6.42e-05	4.38e-05	5.32e-05	9.03e-05	5.02e-05	0.000131168	2.78e-05	1.97e-05	1.91e-05	3.46e-05	0.000152024	6.63e-05	1.1e-05	2.95e-05	4.2e-05	7.26e-05	6.72e-05	5.96e-05
Caldisphaera_lagunensis	0	0	0	0	0	0	0	0	0	0	0	0	0	0	1.23e-06	0	0	0	0	4.03e-07	0	0	0	0	0	0	2.64e-07	0	0	0	4.69e-08	1.67e-07	2.95e-07	0	2.46e-07	0	1.69e-07	0	4.83e-07	0	0	0	0	0	0	2.56e-07	0	0
Calditerrivibrio_nitroreducens	0.000172226	4.87e-05	6.29e-05	4.62e-05	9.36e-05	6.25e-05	6.93e-05	6.08e-05	0.00017091	4.65e-05	2.82e-05	1.86e-05	2.81e-05	0.000132701	0.000106151	2.56e-05	9.02e-05	3.8e-05	2.81e-05	3.83e-05	2.57e-05	5.17e-05	7.96e-05	2.29e-05	2.49e-05	2.83e-05	3.33e-05	1.75e-05	2.12e-05	0.000106454	4.91e-05	1.74e-05	2.57e-05	1.77e-05	1.8e-05	0.000121678	1.94e-05	3.23e-05	9.54e-06	3.78e-05	8.17e-05	6.51e-05	1.68e-05	3.23e-05	1.92e-05	8.75e-05	7.13e-05	5.56e-05
Caldivirga_maquilingensis	1.9e-06	8.32e-07	4.34e-07	6.27e-07	0	2.09e-06	9.9e-07	3.3e-06	5.39e-06	3.36e-06	6.07e-06	2.38e-06	1.46e-06	3.7e-06	1.23e-06	7.62e-06	0	0	1.04e-06	0	2.88e-06	1.82e-06	1.87e-06	8.22e-07	6.2e-07	0	0	0	1.45e-06	1.26e-06	2.11e-06	0	1.08e-06	2.54e-06	5.98e-06	1e-05	2.78e-06	0	0	6.1e-06	2.16e-06	0	1.74e-06	2.2e-06	2.48e-06	5.12e-07	1.64e-06	9.5e-07
Calothrix_parietina	0.000101123	2.29e-05	6.16e-05	3.23e-05	7.28e-05	5.21e-05	0.000114846	5.53e-05	0.000185014	3.86e-05	6.63e-05	3.05e-05	4.54e-05	0.000114802	0.000116612	8.88e-05	4.88e-05	4.98e-05	5.84e-05	5.52e-05	5.04e-05	3.16e-05	4.57e-05	3.64e-05	2.94e-05	4.78e-05	2.85e-05	3.98e-05	4.4e-05	0.000153696	5.69e-05	1.56e-05	4.88e-05	3.81e-05	2.72e-05	9.91e-05	2.91e-05	3.12e-05	1.05e-05	4.65e-05	9.2e-05	7.75e-05	1.74e-05	5.01e-05	3.1e-05	5.84e-05	7.33e-05	9.19e-05
Calothrix_sp._PCC_7507	0.000345399	1.6e-05	3.13e-05	1.83e-05	0.000323871	2.67e-05	0.000382656	3.55e-05	2.49e-06	3.12e-05	3.09e-05	0.000468881	9.55e-05	0.00014196	2.22e-05	0.000118164	1.5e-05	0.000129177	1.11e-05	1.73e-05	6.79e-06	7.3e-06	8.17e-05	6.52e-05	1.47e-05	1.05e-05	0.000106771	2.8e-06	4.29e-05	1.26e-05	0.000262202	1.7e-05	2.47e-05	3.94e-05	1.03e-05	1.15e-05	2.69e-05	5.73e-07	1.1e-05	6.97e-06	4.33e-06	1.29e-05	2.31e-06	3.3e-06	1.91e-05	3.97e-06	3.54e-05	5.73e-05
Calyptogena_okutanii_thioautotrophic_gill_symbiont	6.51e-05	2.23e-06	8.89e-06	4.28e-06	6.39e-05	5.57e-06	5.69e-05	1.95e-05	4.44e-05	2.13e-05	9.94e-06	2.17e-05	0	9.57e-05	3.08e-05	5.45e-05	1.87e-05	3.14e-05	2.7e-05	2.46e-05	5.35e-06	1.24e-05	4.64e-05	2.73e-05	1.44e-05	2.53e-06	9.16e-06	2.1e-06	1.27e-06	3.15e-06	4.15e-05	1.04e-05	1.19e-05	1.81e-06	1.56e-05	4.47e-05	1.8e-05	7.63e-06	0	6.97e-06	3.25e-05	2.85e-05	5.79e-07	7.16e-06	1.12e-06	3.8e-05	2.18e-05	1.45e-05
Campylobacter_coli	7.58e-06	3.09e-06	6.72e-06	3.08e-05	5.42e-05	0.000131766	9.41e-06	2.75e-05	0.000224423	4.05e-05	1.33e-05	3.81e-06	9.52e-05	8.64e-06	7.82e-05	5.23e-05	1.45e-05	3.8e-06	6.22e-05	1.45e-05	3.38e-05	1.38e-05	8.97e-05	1.99e-05	2.72e-05	5.07e-06	4.32e-06	5.73e-05	1.41e-05	3.02e-05	2.19e-05	1.52e-05	5.98e-05	6.43e-06	0.000148787	1.86e-05	8.95e-06	6.58e-06	1.21e-06	2.32e-05	3.73e-05	1.87e-05	1.07e-05	1.8e-05	2.34e-05	4.1e-06	7.69e-05	2.11e-05
Campylobacter_concisus	1.49e-05	2.6e-06	1.67e-05	4.81e-06	2.28e-05	1.98e-05	5.94e-06	5.8e-05	5.27e-05	2.21e-05	1.21e-05	5.72e-06	1.33e-05	1.67e-05	5.85e-06	2.94e-05	1.04e-05	3.14e-05	1.23e-05	3.2e-05	3.21e-05	2.31e-05	2.01e-05	3.15e-06	1.04e-05	1.14e-06	5.29e-06	2.8e-06	1.08e-05	3.15e-06	1.89e-05	1.76e-05	2.05e-05	1.48e-05	4.79e-05	2.42e-05	3.51e-05	9.35e-06	9.66e-07	1.45e-06	0.000275375	3.16e-05	4.92e-06	4.4e-06	1.92e-05	1.23e-05	7.01e-05	9.03e-06
Campylobacter_curvus	6.51e-05	1.42e-05	1.29e-05	1.16e-05	4.53e-05	1.38e-05	3.27e-05	2.28e-05	3.65e-05	3.86e-05	2.21e-05	2.19e-05	3.81e-05	3.7e-05	3.08e-05	1.42e-05	3.24e-05	3.4e-05	1.77e-05	9.87e-06	4.04e-05	3.39e-05	3.58e-05	3.15e-06	5.69e-06	1.25e-05	6.52e-06	3.64e-05	1.48e-05	2.24e-05	3.15e-05	1.53e-05	3.55e-05	1.43e-05	9.56e-05	1.91e-05	2.35e-05	1.1e-05	3.14e-06	3.46e-05	0.000174747	2.24e-05	5.5e-06	8.81e-06	2.39e-05	6.79e-06	3.47e-05	4.66e-05
Campylobacter_fetus	8.22e-05	6.09e-06	2.99e-05	8.99e-06	5.53e-05	1.58e-05	3.56e-05	3.6e-05	1.7e-05	6.71e-06	4.64e-05	4.76e-07	1.8e-05	5.62e-05	8.22e-05	8.44e-05	9.14e-05	1.9e-05	8.39e-05	2.58e-05	2.06e-05	1.97e-05	5.34e-05	1.85e-05	1.62e-05	0	1.15e-06	8.39e-06	1.85e-06	8.25e-05	3.39e-05	5.99e-06	4.32e-05	1.29e-05	3.27e-05	9.57e-05	7.16e-05	2.12e-05	3.02e-06	1.89e-05	0.000491779	3.24e-05	1.48e-05	1.67e-05	2.29e-05	8.07e-06	5.28e-05	2.26e-05
Campylobacter_hominis	1.86e-05	5.19e-06	7.37e-06	5.96e-06	5.86e-05	1.23e-05	7.38e-05	2.01e-05	3.32e-05	3.74e-05	1.44e-05	1.4e-05	6.02e-05	1.98e-05	3.32e-05	2.67e-05	3.95e-05	1.06e-05	4.04e-05	6.04e-06	2.43e-05	2.23e-05	2.76e-05	1.12e-05	3.22e-05	2.09e-05	1.12e-05	5.52e-05	1.83e-05	2.71e-05	1.8e-05	1.19e-05	4.44e-05	1.15e-05	6.67e-05	4.69e-05	2.09e-05	1.23e-05	3.14e-06	2.15e-05	0.000246701	2.89e-05	4.98e-05	3.85e-06	4.09e-05	1.79e-05	3.69e-05	4.02e-05
Campylobacter_jejuni	4.96e-05	3.43e-06	2.54e-05	2.64e-05	0.000156658	2.38e-05	5.69e-05	3.19e-05	2.57e-05	5.71e-05	2.26e-05	1.76e-05	7.97e-05	7.65e-05	7.88e-05	8.66e-05	4.38e-05	1.32e-05	3.95e-05	3.62e-06	4.08e-05	5.47e-05	5.29e-05	3.04e-05	2.86e-05	1.9e-06	2.17e-05	3.98e-05	1.64e-05	2.52e-05	7.11e-05	3.46e-05	0.000132961	4.46e-05	0.000297292	6.02e-05	1.22e-05	1.4e-05	8.94e-06	6.1e-05	0.000231012	3.93e-05	2.2e-05	8.44e-06	4.96e-05	2.23e-05	5.13e-05	3.06e-05
Campylobacter_lari	6.57e-05	5.42e-06	2.65e-05	2.1e-05	0.000170824	5.51e-05	7.92e-06	2.34e-05	9.87e-05	5.78e-05	4.91e-05	2.43e-05	0.000105007	4.26e-05	3.02e-05	2.72e-05	4.86e-05	2.78e-05	9.01e-06	3.52e-05	3.58e-05	2.84e-05	8.15e-05	1.04e-05	1.73e-05	7.6e-07	3.96e-06	4.54e-05	1.31e-05	4.5e-05	5.98e-05	3.3e-05	9.47e-05	1.27e-06	0.000213356	1.46e-05	3.12e-05	1.34e-06	1.21e-06	1.57e-05	0.000143909	1.41e-05	0	2.39e-06	5.79e-05	7.56e-06	3.79e-05	7.34e-05
Candidatus_Accumulibacter_phosphatis	7.62e-05	5.97e-05	4.25e-05	1.86e-05	6.44e-05	3.84e-05	0.000139103	7.53e-05	7.67e-05	5.35e-05	8.83e-05	5.93e-05	2.77e-05	9.13e-05	4.12e-05	2.94e-05	3.22e-05	0.000118979	3.85e-05	6.24e-05	4.12e-05	6.14e-05	7.87e-05	2.21e-05	3.72e-05	5.75e-05	3.58e-05	5.73e-05	9.49e-05	5.45e-05	3.37e-05	5.03e-05	8.21e-05	6.63e-05	7.02e-05	0.000142184	3e-05	3.3e-05	1.51e-05	6.19e-05	4.06e-05	5.03e-05	7.61e-05	2.02e-05	5.31e-05	8.45e-05	0.000115622	9.77e-05
Candidatus_Amoebophilus_asiaticus	8.88e-05	1.29e-05	3.13e-05	1.23e-05	5.42e-05	4.24e-05	6.93e-05	3.77e-05	0.000111174	4.65e-05	8.83e-05	3.55e-05	1.09e-05	0.000104309	2.83e-05	5.99e-05	2.53e-05	5.2e-05	5.65e-05	4.89e-05	2.33e-05	7.08e-05	7.12e-05	3.58e-05	2.23e-05	6.97e-06	6.78e-06	2.59e-05	1.51e-05	4.6e-05	6.97e-05	3.06e-05	1.08e-05	3.11e-05	9.95e-05	0.000229121	2.26e-05	1.27e-05	3.74e-06	2.47e-05	4.06e-05	5.47e-05	2.46e-05	2.46e-05	3.29e-05	2.05e-05	5.62e-05	6.08e-05
Candidatus_Arthromitus_sp._SFB-mouse	5.02e-05	1.7e-05	3.65e-05	2.53e-05	0.000115271	3.48e-05	6.93e-05	0.000133599	0.000113249	5.54e-05	3.75e-05	4.1e-05	2.59e-05	0.000161093	5.69e-05	0.000126332	4.51e-05	4.26e-05	4.71e-05	3.91e-05	2.76e-05	6.91e-05	0.000129047	4.25e-05	2.74e-05	6.42e-05	2.12e-05	4.47e-05	2.78e-05	4.82e-05	2.54e-05	4.94e-05	6.02e-05	6.16e-05	8.42e-05	0.000118967	1.81e-05	2.62e-05	1.86e-05	2.41e-05	0.000123351	6.36e-05	5.67e-05	5.23e-05	2.62e-05	4.94e-05	0.00011191	4.75e-05
Candidatus_Arthromitus_sp._SFB-rat-Yit	3.89e-05	9.32e-06	1.95e-05	2.53e-05	4.06e-05	1.64e-05	1.93e-05	2.25e-05	1.12e-05	5.99e-05	7.73e-06	2e-05	1.09e-06	6.67e-05	2e-05	0.000178608	0.000104078	2.04e-05	4.37e-05	3.02e-05	1.91e-05	5.92e-05	5.01e-05	1.96e-05	3.23e-05	1.41e-05	9.69e-06	0.000121642	1.45e-06	7.12e-05	2.92e-05	2.49e-05	9.94e-05	7.7e-06	0.000101405	4.75e-05	5.74e-06	9.83e-06	5.8e-06	2.12e-05	0.000115235	3.53e-05	2.26e-05	6.42e-06	3.25e-05	2.73e-05	4.84e-05	4.32e-05
Candidatus_Azobacteroides_pseudotrichonymphae	0.000573558	2.57e-05	0.000210694	0.000137597	0.000652464	0.000356782	0.00228158	0.00049536	0.00208286	0.000202104	0.00134673	8.43e-05	0.000114669	0.00360145	0.00017938	0.000280981	0.000261545	0.000178168	0.00010223	0.000204573	0.00023099	0.000297598	0.000452014	0.000191106	0.00018459	3.28e-05	8.06e-05	7.27e-05	0.000478847	0.000108343	0.00137635	0.000110954	0.000286052	0.000139264	0.000366114	0.00109392	0.000308437	0.000309772	2.16e-05	0.000506224	0.000189895	0.000573438	0.00011715	8.9e-05	0.000729529	0.000101827	0.000408576	9.12e-05
Candidatus_Baumannia_cicadellinicola	7.27e-06	2.06e-06	2.71e-06	1.25e-06	6.11e-06	3.86e-06	0	5.5e-06	7.47e-06	3.84e-06	2.21e-06	4.76e-07	3.1e-06	1.23e-06	1.72e-05	1.31e-05	1.6e-05	4e-07	0	2.01e-06	8.23e-07	3.85e-06	1.17e-06	3.42e-06	4.86e-06	3.04e-06	3.52e-07	0	4.05e-07	1.89e-06	1.64e-06	3.72e-06	7.17e-06	1.63e-06	6.08e-06	1.29e-05	1.77e-06	4.58e-06	0	2.32e-06	1.57e-05	2.08e-06	2.89e-06	5.87e-06	6.33e-06	2.56e-06	6.86e-06	4.75e-07
Candidatus_Blochmannia_chromaiodes	1.26e-06	3.93e-06	1.08e-06	1.04e-06	0	5.07e-07	0	2.2e-06	0	1.15e-05	0	0	1.82e-06	0	0	6.53e-06	8.31e-07	0	1.73e-06	0	0	0	9.37e-07	0	0	2.53e-07	0	4.19e-06	0	0	2.42e-06	0	7.76e-06	3.62e-07	1.37e-06	1.86e-06	1.01e-06	1.15e-06	0	0	1.73e-05	0	8.1e-06	5.14e-06	7.44e-07	5.12e-07	9.44e-07	0
Candidatus_Blochmannia_floridanus	5.37e-06	6.32e-07	4.34e-07	1.25e-06	2.22e-06	5.95e-06	0	1.35e-05	8.01e-05	1.44e-06	3.31e-06	5.95e-06	1.64e-06	8.02e-05	0	8.17e-06	0	2e-06	5.98e-05	4.17e-05	0	1.22e-06	1.12e-05	1.23e-05	2.17e-06	1e-05	5.11e-06	3.98e-05	1.2e-05	1.42e-05	5.14e-06	1.86e-06	3.93e-06	3.17e-06	5.52e-06	4.41e-06	1.18e-06	1.72e-06	1.69e-06	1.74e-06	1.62e-05	2.49e-06	1.16e-06	2.75e-06	7.44e-07	7.04e-06	1.82e-06	4.11e-05
Candidatus_Blochmannia_pennsylvanicus	0	0	1.84e-06	0	1.67e-06	0	0	0	0	4.79e-07	0	0	0	0	0	3.27e-06	0	0	6.93e-07	0	0	0	0	0	0	0	0	0	2.31e-07	0	4.22e-07	8.35e-08	0	3.62e-07	1.69e-06	0	0	0	0	0	2.16e-06	1.25e-06	0	0	0	0	2.52e-07	0
Candidatus_Blochmannia_vafer	2.09e-05	2.96e-06	1.05e-05	1.88e-06	1.39e-06	4.94e-06	9.5e-05	2.01e-05	6.06e-05	9.59e-07	7.84e-05	1.43e-06	0	1.11e-05	4.31e-06	3.1e-05	7.06e-06	1.12e-05	8.66e-06	2.42e-06	8.23e-06	7.7e-06	2.34e-06	1.23e-06	3.93e-06	2.53e-06	4.14e-06	6.29e-06	2.55e-06	0	2.02e-06	3.76e-07	8.35e-06	1.45e-06	3.94e-06	8.27e-05	0	5.73e-07	0	0	3.79e-06	0	6.36e-06	7.52e-06	7.44e-07	3.84e-06	2.32e-05	1.43e-06
Candidatus_Carsonella_ruddii	0.000254388	4.47e-05	0.000179789	6.95e-05	0.000361091	0.000132843	0.000562351	0.000370283	0.000485351	0.000154874	0.000194914	0.000248133	0.000166443	0.000477107	0.000420912	0.000454688	0.000714211	0.000244556	0.000307208	0.000211418	0.000439128	0.00024043	0.000378708	0.000238917	0.00015853	8.12e-05	0.00012254	0.000424349	0.000152905	0.00022519	0.000135596	0.000130535	0.000214662	8.5e-05	0.000188189	0.00034097	8.1e-05	0.00012702	4.5e-05	0.00025718	0.000428481	0.00023694	7.06e-05	9.67e-05	0.000102819	0.000104516	0.000307675	0.00020718
Candidatus_Chloracidobacterium_thermophilum	0.000346663	4.83e-05	0.000208092	8.33e-05	0.000257764	0.000140255	0.000422754	0.000169335	0.000163858	6.21e-05	0.000397007	0.000170264	7.55e-05	0.000354899	0.000194149	0.000141579	9.99e-05	0.000650883	0.000121116	0.00035478	0.000186521	0.000143123	0.000377771	9.34e-05	5.31e-05	2.64e-05	0.000103159	6.78e-05	0.000336471	0.000186136	8.91e-05	0.000111997	0.000221339	0.000138178	8.28e-05	0.000524335	6.88e-05	7.46e-05	1.82e-05	0.000117112	0.000128761	0.000115768	8.1e-05	8.59e-05	0.000100214	0.000248867	0.000517027	0.000340944
Candidatus_Cloacamonas_acidaminovorans	4.68e-05	2.3e-05	4.92e-05	3.35e-05	6.39e-05	3.55e-05	8.07e-05	4.48e-05	8.21e-05	4.34e-05	8.78e-05	3.19e-05	1.42e-05	0.000225901	4.52e-05	6.48e-05	4.63e-05	0.000204163	4.78e-05	4.39e-05	2.2e-05	6.2e-05	8.76e-05	2.32e-05	5.02e-05	6.63e-05	7.58e-06	2.94e-05	2.53e-05	3.68e-05	6.83e-05	2.48e-05	5.42e-05	2.37e-05	6.63e-05	0.000155741	4.86e-05	2.75e-05	5.55e-06	0.000109847	0.000110907	0.000115353	1.36e-05	3.38e-05	3.71e-05	0.00012898	0.000100839	8.98e-05
Candidatus_Desulforudis_audaxviator	0.000113448	3.24e-05	4.12e-05	3.32e-05	6.53e-05	6.39e-05	0.000249494	5.42e-05	0.000112419	7.46e-05	0.000223075	4.81e-05	1.22e-05	0.000162328	5.72e-05	0.000115442	0.000150612	7.92e-05	5.87e-05	4.15e-05	5.97e-05	6.06e-05	8.17e-05	1.08e-05	4.89e-05	2.56e-05	2.38e-05	0.000116049	5.84e-05	4.76e-05	7.79e-05	3.77e-05	2.22e-05	3.97e-05	6.07e-05	0.000215055	4.68e-05	6.67e-05	2.05e-05	6.36e-05	7.2e-05	6.48e-05	1.3e-05	2.9e-05	4.43e-05	4.44e-05	9.51e-05	6.11e-05
Candidatus_Endolissoclinum_faulkneri	1.45e-05	6.82e-06	1.04e-05	1.31e-05	3.72e-05	8.24e-06	4.46e-05	1.04e-05	2.49e-06	1.92e-06	1.55e-05	7.14e-07	0	3.7e-06	2.77e-05	2.29e-05	1.87e-06	1.34e-05	1.44e-05	1.29e-05	4.26e-05	8.51e-06	2.67e-05	1.18e-05	3e-06	5.07e-07	3.52e-07	3.5e-06	5.73e-06	2.65e-05	6.99e-06	1.83e-05	2.55e-06	2.35e-06	1.47e-05	2.32e-05	8.95e-06	4.68e-06	1.93e-06	0	5.25e-05	1.58e-05	0	7.89e-06	1e-05	4.1e-06	2.11e-05	2.02e-05
Candidatus_Hamiltonella_defensa	0.000160849	2.5e-06	8.24e-06	5.64e-06	8.39e-05	7.73e-06	1.29e-05	7.15e-06	1.91e-05	3.6e-06	4.42e-06	1.43e-05	4.43e-05	6.17e-06	1.82e-05	0.000185687	3.14e-05	2.16e-05	2.95e-05	2.54e-05	8.85e-06	1.89e-05	3.09e-05	2.75e-05	6.56e-05	1.61e-05	1.44e-05	2.03e-05	5.67e-06	5.42e-05	2.22e-05	5.53e-06	9.23e-06	3.98e-06	9.6e-06	3.32e-05	7.37e-05	1.72e-06	3.14e-05	2.27e-05	0.000169878	2.76e-05	5.79e-07	3.1e-05	5.33e-06	7.56e-06	2.09e-05	3.21e-05
Candidatus_Hodgkinia_cicadicola	1.26e-06	2.53e-06	1.08e-06	1.04e-06	8.33e-07	3.17e-07	0	8.52e-06	0	0	1.1e-06	3.1e-06	0	0	7.69e-06	2.18e-06	7.27e-06	6.4e-06	4.85e-06	2.42e-06	3.29e-06	1.01e-06	4.92e-06	1.78e-06	2.07e-06	6.33e-07	4.4e-07	0	5.21e-07	6.3e-07	1.97e-06	7.52e-07	4.91e-07	2.72e-07	7.03e-07	1.86e-06	5.06e-07	0	2.42e-07	5.81e-07	3.25e-06	3.12e-06	0	1.1e-06	3.72e-07	6.4e-07	1.2e-05	2.14e-06
Candidatus_Kinetoplastibacterium_crithidii	4.42e-05	3.39e-06	1.81e-05	3.13e-06	1.03e-05	9.5e-06	4.85e-05	2.58e-05	0.000131916	1.77e-05	1.88e-05	8.33e-06	7.66e-06	1.85e-05	2.49e-05	8.71e-06	9.97e-06	6.6e-06	6.93e-06	2.11e-05	2.76e-05	6.69e-06	2.55e-05	1.37e-05	4.14e-07	1.58e-05	1.09e-05	5.52e-05	1.39e-05	3.56e-05	1.05e-05	3.28e-06	1.03e-05	4.53e-06	1.3e-05	6.25e-05	3.63e-06	4.77e-06	2.42e-06	7.85e-05	5.41e-06	1.27e-05	5.21e-06	5.32e-06	3.72e-06	4.65e-05	2.34e-05	3.3e-05
Candidatus_Kinetoplastibacterium_desouzaii	1.58e-05	7.32e-07	7.48e-06	1.79e-05	3.61e-06	8.3e-06	1.93e-05	6.6e-06	3.03e-05	2.28e-05	1.82e-05	1.02e-05	1.46e-06	0	1.91e-05	1.31e-05	3.43e-05	1.6e-06	2.17e-05	6.44e-06	4.12e-06	5.68e-06	2.08e-05	9.45e-06	9.31e-07	0	4.4e-07	8.11e-05	3.47e-06	3.21e-05	8.99e-06	8.77e-06	1.64e-05	6.34e-07	1.68e-05	4.07e-06	1.27e-06	1.72e-06	1.45e-06	2.06e-05	2.16e-06	5.82e-06	1.16e-06	3.67e-07	2.23e-06	5.89e-06	1.19e-05	6.65e-06
Candidatus_Kinetoplastibacterium_galatii	8.22e-06	1.23e-06	4.12e-06	3.03e-06	1.33e-05	2.34e-06	6.93e-06	7.15e-06	4.44e-05	5.27e-06	1.38e-05	0	1.09e-06	1.91e-05	7.38e-06	3.49e-05	0	0	1.25e-05	2.82e-06	1.24e-06	1.05e-05	3.75e-06	0	3.72e-06	0	8.02e-06	0	0	1.07e-05	9.01e-06	1.48e-06	3.46e-05	3.35e-06	3.16e-05	2.51e-05	4.22e-07	3.05e-06	1.81e-06	1.95e-05	1.3e-05	8.11e-06	4.92e-06	1.1e-06	7.44e-07	2.24e-05	8.24e-06	0
Candidatus_Kinetoplastibacterium_oncopeltii	6.95e-06	5.99e-07	3.36e-06	6.27e-07	0	5.32e-06	9.9e-07	1.29e-05	5.81e-06	2.88e-06	2.21e-06	4.76e-07	1.46e-06	7.41e-06	0	4.36e-06	1.04e-06	1.6e-06	5.2e-07	0	2.88e-06	6.28e-06	0	8.22e-07	4.86e-06	7.6e-07	2.91e-06	1.4e-06	2.55e-06	2.83e-06	1.5e-06	3.28e-06	5.01e-06	6.16e-06	3.42e-05	4.41e-06	3.38e-07	0	1.21e-06	8.72e-07	2.49e-05	3.33e-06	5.79e-07	9.17e-07	7.44e-07	2.43e-06	8.43e-06	1.43e-06
Candidatus_Korarchaeum_cryptofilum	0	0	0	0	0	0	0	0	0	0	0	0	0	0	0	0	0	0	0	0	0	0	0	0	0	0	0	0	0	0	0	0	0	0	0	0	0	0	0	0	0	0	0	0	0	0	0	0
Candidatus_Koribacter_versatilis	9.42e-05	4.97e-05	0.000177404	2.52e-05	9.58e-05	0.000136137	7.33e-05	0.000137172	0.00018294	0.000118193	0.000182767	0.000126924	0.000117768	0.000266637	5.91e-05	0.000131778	9.95e-05	0.00027675	6.12e-05	0.000227527	8.61e-05	0.000159949	0.000344514	6.95e-05	0.000128437	3.98e-05	8.15e-05	9.93e-05	0.000246915	0.000118107	9.09e-05	9.76e-05	0.000179507	0.000141166	0.000102741	0.000569074	5.95e-05	4.04e-05	4.93e-05	9.1e-05	8.6e-05	0.000119302	0.000171242	9.94e-05	0.000112493	0.00023593	0.000363221	0.00020718
Candidatus_Liberibacter_asiaticus	2.65e-05	5.59e-06	1.51e-05	5.14e-05	5.56e-05	5.7e-05	0.0001792	1.84e-05	6.72e-05	4.79e-06	1.33e-05	1.43e-06	1.82e-06	2.35e-05	2.22e-05	5.99e-06	2.7e-06	3.22e-05	3.64e-06	1.17e-05	4.26e-05	2.84e-06	3.96e-05	4.93e-06	2.99e-05	0	3e-06	6.99e-06	5.44e-06	1.1e-05	2.19e-05	1.32e-05	6.19e-06	1.45e-06	1.05e-05	4.91e-06	8.61e-06	3.44e-06	2.42e-07	1.16e-05	2.38e-05	1.64e-05	2.89e-06	8.99e-06	2.11e-06	3.33e-06	3.13e-05	3.33e-06
Candidatus_Liberibacter_solanacearum	1.99e-05	1.16e-06	7.37e-06	4.6e-06	1.67e-05	4.94e-06	6.93e-06	2.17e-05	1.99e-05	6.47e-06	0	1.1e-05	2.01e-06	2.28e-05	3.38e-05	1.85e-05	1.68e-05	1.06e-05	2.63e-05	7.45e-06	1.34e-05	8.92e-06	2.37e-05	6.3e-06	8.79e-06	1.01e-06	9.69e-07	2.1e-06	2.14e-06	5.98e-06	1.56e-05	7.41e-06	5.7e-06	2.99e-06	5.38e-06	4.75e-06	4.64e-06	4.2e-06	3.02e-06	6.1e-06	2.38e-05	1.1e-05	5.79e-07	3.3e-06	1.61e-06	3.59e-06	1.07e-05	9.98e-06
Candidatus_Methanomassiliicoccus_intestinalis	1.64e-05	5.77e-05	2.73e-05	5.43e-06	3.17e-05	0.000171549	0.000112866	8.33e-05	0.000217786	0.000152477	8.39e-05	9.5e-05	0.000105007	0.000128381	5.23e-05	9.42e-05	4.45e-05	4.48e-05	4.56e-05	5.17e-05	4.8e-05	6.39e-05	4.45e-05	2.79e-05	3.96e-05	3.8e-07	1.94e-06	1.4e-06	0.00010749	1.26e-06	9.47e-05	2.07e-06	8.74e-05	0.000220849	0.000265552	0.000569922	0.000133839	8.59e-07	0	0.000568993	5.95e-05	1.93e-05	0.000182523	7.05e-05	0.000147096	3.23e-05	9.96e-05	4.85e-05
Candidatus_Methanomethylophilus_alvus	0.00017823	0.000523651	0.000148451	5.55e-05	0.000315538	0.00126647	0.000826201	0.000592123	0.00155603	0.00140178	0.000607382	0.000785596	0.000549829	0.000551173	0.000408605	0.000719332	0.000440202	0.000265352	0.000347754	0.000346324	0.000692558	0.00028138	0.000378474	0.000280563	0.000248085	1.01e-05	4.14e-06	0	0.000729754	5.8e-05	0.00082308	1.43e-05	0.000727454	0.00180727	0.00218185	0.00499237	0.00103299	3.22e-05	4.23e-06	0.00373217	0.000749301	0.000217819	0.00152729	0.000694837	0.000865711	0.000465328	0.000805452	0.000439782
Candidatus_Methylomirabilis_oxyfera	5.34e-05	2.37e-05	3.74e-05	2.19e-05	9.97e-05	3.69e-05	0.000433644	3.3e-05	9.96e-05	3.74e-05	0.000177245	3.69e-05	3.01e-05	0.000158624	3.57e-05	0.000113808	5.67e-05	5.36e-05	4.92e-05	5.54e-05	4.06e-05	6.35e-05	8.85e-05	4.18e-05	2.96e-05	2.66e-05	4.28e-05	1.68e-05	6.48e-05	5.26e-05	6.11e-05	1.93e-05	3.52e-05	5.27e-05	6.22e-05	7.81e-05	2.24e-05	1.7e-05	9.3e-06	3.69e-05	5.57e-05	4.43e-05	1.91e-05	1.94e-05	2.84e-05	2.78e-05	0.000112288	5.3e-05
Candidatus_Midichloria_mitochondrii	2.24e-05	3.99e-06	1.27e-05	2.3e-06	1.42e-05	8.24e-06	3.56e-05	1.57e-05	7.88e-06	1.41e-05	2.6e-05	8.33e-06	1.29e-05	1.05e-05	5.82e-05	0.00012851	6.52e-05	8.8e-06	0.000212776	1.03e-05	2.06e-06	1.48e-05	2.95e-05	2.29e-05	4.92e-05	4.18e-06	5.2e-06	9.16e-05	4.57e-06	4.72e-05	1.12e-05	3.3e-06	8.19e-05	1.09e-06	9.38e-06	7.12e-05	9.87e-06	2.28e-05	2.23e-05	1.77e-05	0.000300802	3.53e-06	5.21e-05	7.52e-06	4.84e-05	8.97e-06	7.22e-05	3.4e-05
Candidatus_Moranella_endobia	2.75e-05	1.73e-06	2.93e-06	1.55e-05	1.78e-05	1.67e-05	8.91e-06	9.07e-06	7.88e-06	3.84e-06	0	2.86e-06	2.02e-05	2.47e-06	4.31e-06	3.65e-05	6.65e-06	1.2e-05	1.02e-05	4.03e-06	2.47e-06	1.62e-06	2.11e-06	3.15e-06	1.2e-05	1.24e-05	6.96e-06	0	6.02e-06	0	5.49e-06	4.76e-06	5.89e-07	6.34e-06	9.95e-06	1.37e-05	1.54e-05	1.15e-06	6.88e-06	0	3.25e-05	7.07e-06	4.63e-06	1.14e-05	2.23e-06	3.71e-06	5.35e-06	4.75e-06
Candidatus_Mycoplasma_haemolamae	0	9.98e-07	0	0	0	0	0	0	0	9.59e-07	0	0	0	0	0	0	4.78e-06	0	1.39e-06	0	0	0	0	3.29e-06	2.38e-06	7.6e-07	1.06e-06	0	2.31e-07	0	4.22e-07	4.59e-07	6.87e-07	2.72e-07	2.81e-07	1.02e-06	0	0	0	6.39e-06	0	2.49e-06	0	0	7.44e-07	1.02e-06	0	3.56e-06
Candidatus_Mycoplasma_haemominutum	0	3.99e-07	3.25e-07	1.67e-06	0	1.39e-06	0	1.35e-05	0	0	3.31e-06	2.38e-06	0	0	1.57e-05	1.74e-05	3.32e-06	3e-06	0	0	2.47e-06	2.03e-06	1.59e-05	0	9.31e-07	1.27e-06	0	0	0	0	7.28e-07	1.46e-06	2.55e-06	5.43e-07	3.16e-06	4.24e-06	0	0	0	0	0	0	0	0	0	1.15e-06	6.92e-07	0
Candidatus_Nasuia_deltocephalinicola	3.16e-06	2.66e-07	5.53e-06	3.03e-06	7.78e-06	1.06e-05	4.46e-06	1.76e-05	9.96e-06	9.59e-07	1.1e-05	2.38e-06	1.09e-06	2.96e-05	2.22e-05	9.8e-06	9.76e-06	2.22e-05	1.63e-05	1.13e-05	5.97e-06	9.53e-06	1.33e-05	3.01e-06	1.86e-06	1.65e-06	3.88e-06	3.5e-06	3.7e-06	2.2e-06	7.98e-06	2.48e-06	6.68e-06	6.88e-06	5.45e-06	4.73e-05	2.7e-06	3.82e-07	2.42e-07	8.72e-07	1.89e-05	3.95e-06	0	2.94e-06	2.23e-06	8.71e-06	8.81e-06	7.37e-06
Candidatus_Nitrosoarchaeum_koreensis	0	0	0	0	8.33e-07	0	0	3.3e-06	0	0	4.42e-06	2.86e-06	0	0	0	0	0	0	1.04e-06	1.21e-06	0	0	0	0	4.14e-07	1.77e-06	0	0	0	0	0	1.04e-07	0	2.72e-07	6.68e-07	3.39e-07	0	0	1.21e-06	0	3.25e-06	0	5.79e-07	0	1.24e-06	1.02e-06	7.55e-07	4.75e-07
Candidatus_Nitrosopumilus_sp._AR2	0	0	0	6.27e-07	0	0	0	3.3e-06	0	0	0	0	0	2.47e-06	0	5.45e-06	1.25e-06	0	0	0	0	8.11e-07	0	0	0	0	1.41e-06	0	1.33e-06	0	0	0	1.96e-07	0	1.41e-07	1.69e-06	0	0	0	0	0	0	0	0	4.96e-07	0	0	0
Candidatus_Nitrososphaera_gargensis	0	3.33e-07	0	0	0	5.07e-07	5.45e-06	0	0	0	1.1e-06	0	1.09e-06	0	0	0	0	0	0	8.05e-07	0	8.11e-07	0	5.48e-07	0	1.52e-06	1.76e-07	0	9.83e-07	0	7.75e-07	4.18e-08	6.87e-07	0	5.62e-07	5.08e-07	3.38e-07	1.24e-06	0	5.81e-07	0	0	1.74e-06	7.34e-07	0	0	2.33e-06	2.85e-06
Candidatus_Nitrospira_defluvii	9.01e-05	3.44e-05	6.28e-05	0.000127672	0.000135548	7.05e-05	0.000331174	0.00011848	0.000176303	3.91e-05	0.000171723	8.93e-05	1.37e-05	0.000369712	5.51e-05	0.000107274	0.000549265	9.7e-05	0.000131339	0.000137523	8.03e-05	0.000105011	0.000134433	0.000140007	0.000102067	6.74e-05	1.82e-05	0.000132827	7.97e-05	0.000144248	0.000125714	3.57e-05	9.11e-05	3.02e-05	9.3e-05	0.000144387	5.06e-05	8.4e-05	1.82e-05	0.000103453	0.000133089	0.000144035	7.12e-05	4.44e-05	0.000130973	4.52e-05	0.000151919	0.000139941
Candidatus_Pelagibacter_sp._IMCC9063	6e-06	1.06e-06	9.98e-06	9.09e-06	1.03e-05	8.62e-06	1.29e-05	2.53e-05	1.53e-05	9.59e-06	1.66e-05	1.91e-06	4.56e-06	8.64e-06	1.75e-05	5.5e-05	1.6e-05	3.2e-06	1.25e-05	4.23e-06	1.03e-05	9.53e-06	1.64e-05	2.74e-06	5.89e-06	3.42e-06	1.5e-06	0	6.36e-07	6.61e-06	4.79e-06	1.13e-05	1.1e-05	4.71e-06	1.54e-05	1.02e-05	3.38e-06	6.3e-06	0	1.57e-05	1.46e-05	1.04e-05	0	7.52e-06	2.73e-06	2.56e-06	8.93e-06	6.41e-06
Candidatus_Pelagibacter_ubique	7.9e-06	1.4e-06	1.26e-05	7.31e-06	4.56e-05	2.36e-05	0.000121282	0.00019435	0.000116567	3.24e-05	1.1e-05	1.57e-05	0	3.21e-05	1.51e-05	8.66e-05	3.12e-06	1.6e-06	3.22e-05	4.03e-07	0.000320751	3.51e-05	6.51e-05	1.79e-05	1.49e-05	1.77e-06	1.13e-05	6.29e-06	3.88e-06	1.7e-05	2.48e-05	3.38e-06	5.46e-05	1.37e-05	0.000227908	5.2e-05	2.19e-06	6.3e-06	2.17e-06	1.39e-05	9.2e-06	1.52e-05	2.6e-06	2.9e-05	3.72e-06	4.01e-05	2.09e-05	1.35e-05
Candidatus_Phytoplasma_australiense	0	0	0	0	1.67e-06	0	0	0	0	0	0	1.43e-06	0	0	0	3.27e-06	0	0	0	8.05e-07	0	0	0	0	2.48e-06	0	0	0	0	0	0	0	5.89e-07	0	5.98e-07	0	7.59e-07	8.59e-07	0	0	0	0	0	0	0	7.69e-07	0	0
Candidatus_Phytoplasma_mali	0.000187078	3.34e-05	8.2e-05	8.91e-05	0.000190823	0.000180735	0.000221772	0.000236959	0.000288307	8.3e-05	0.000156263	0.000117875	4.76e-05	0.00035243	0.000122766	0.000224893	0.000143549	0.000102781	7.9e-05	9.79e-05	8.54e-05	0.000123459	0.000190642	7.36e-05	9.4e-05	3.57e-05	3.58e-05	0.000162888	6.38e-05	9.86e-05	0.000186482	3.99e-05	0.000133746	7.68e-05	0.000124428	0.00028352	3.69e-05	2.65e-05	3.98e-05	8.51e-05	8.93e-05	0.000143619	7.84e-05	5.1e-05	9.26e-05	5.8e-05	0.000191738	0.000150395
Candidatus_Portiera_aleyrodidarum	5.06e-06	6.36e-06	1.57e-05	2.55e-05	9.72e-06	1.22e-05	1.44e-05	3.63e-05	1.45e-05	7.02e-05	2.21e-06	2.86e-06	4.38e-06	1.85e-06	9.54e-06	3.21e-05	2.91e-06	1.08e-05	2.15e-05	3.62e-06	1.65e-06	7.5e-06	8.99e-05	2.74e-06	2.47e-05	2.61e-05	5.37e-06	3.36e-05	5.26e-06	7.24e-06	1.1e-05	1.71e-05	1.94e-05	9.78e-06	2.19e-05	1.75e-05	3.38e-07	5.34e-06	4.83e-07	6.39e-06	2e-05	4.99e-06	2.02e-06	3.85e-06	3.35e-06	1.27e-05	1.62e-05	3.09e-06
Candidatus_Profftella_armatura	3.67e-05	3.46e-06	1.63e-05	3.34e-06	1.58e-05	1.22e-05	2.87e-05	2.36e-05	8.96e-05	1.39e-05	1.88e-05	5.95e-06	8.75e-06	3.39e-05	1.11e-05	3.21e-05	1.45e-05	5.2e-06	1.61e-05	7.65e-06	6.38e-06	1.62e-05	2.67e-05	1.15e-05	5.17e-06	7.73e-06	9.16e-06	3.5e-06	8.1e-06	4.44e-05	1.23e-05	5.87e-06	2.82e-05	3.44e-06	2.77e-05	6.13e-05	4.47e-06	7.25e-06	7.25e-07	2.64e-05	1.03e-05	9.77e-06	4.92e-06	1.16e-05	7.32e-06	2.42e-05	2.34e-05	5.7e-06
Candidatus_Protochlamydia_amoebophila	5.69e-06	7.69e-06	7.05e-06	3.13e-06	1.08e-05	5.07e-07	0	5.5e-06	1.66e-06	1.68e-05	1.1e-06	2.38e-06	0	0	1.69e-05	5.12e-05	2.68e-05	8e-07	1.18e-05	1.09e-05	1.73e-05	8.11e-07	8.43e-06	1.36e-05	2.57e-05	7.6e-06	2.64e-07	1.33e-05	2.95e-06	5.04e-06	1.35e-05	3.11e-06	8.35e-06	3.8e-06	4.46e-06	8.3e-06	1.94e-06	1.72e-06	0	1.51e-05	1.24e-05	2.06e-05	8.68e-07	8.26e-06	6.95e-06	3.07e-06	4.01e-05	4.75e-07
Candidatus_Puniceispirillum_marinum	7.87e-05	1.65e-05	4.81e-05	0.000118269	0.000103328	4.2e-05	0.000156429	4.4e-05	2.49e-06	9.83e-06	2.43e-05	1.02e-05	1.48e-05	9.88e-06	4.74e-05	2.01e-05	1.06e-05	6.96e-05	3.92e-05	4.15e-05	7.99e-05	1.99e-05	7.73e-05	5.29e-05	8.6e-05	1.43e-05	8.37e-06	1.12e-05	4.69e-06	6.74e-05	2.76e-05	3.03e-05	1.95e-05	1.77e-05	2.89e-05	5.19e-05	1.88e-05	1.23e-05	4.83e-06	2.27e-05	0.000131466	7.07e-05	1.21e-05	4.97e-05	6.95e-06	5.12e-06	5.33e-05	4.25e-05
Candidatus_Rickettsia_amblyommii	9.48e-06	1.06e-06	3.8e-06	8.67e-06	9.44e-06	4.05e-06	1.19e-05	3.02e-06	0	0	0	9.53e-07	5.1e-06	1.23e-06	3.69e-06	0	2.49e-06	6.8e-06	3.47e-06	7.25e-06	8.65e-06	6.08e-07	5.86e-06	2.19e-06	9.93e-06	0	1.5e-06	0	1.62e-06	2.83e-06	3.59e-06	3.95e-06	5.4e-06	3.35e-06	2.74e-06	0	2.87e-06	7.63e-07	7.25e-07	1.16e-06	7.03e-06	6.44e-06	8.68e-07	2.75e-06	0	2.56e-07	2.45e-06	9.5e-07
Candidatus_Riesia_pediculicola	2.72e-05	1.66e-07	1.95e-06	0	1.67e-05	0	4.46e-06	1.65e-06	9.54e-06	3.12e-06	9.94e-06	2.86e-06	0	1.05e-05	2.46e-06	3.43e-05	7.89e-06	1.6e-06	1.04e-06	4.83e-06	0	3.04e-06	1.41e-06	6.3e-06	1.04e-05	1.66e-05	1.59e-06	0	4.63e-07	1.89e-06	4.93e-06	8.98e-07	7.17e-06	0	6.75e-06	2.2e-05	1.45e-05	2.86e-06	0	1.16e-06	2.49e-05	5.61e-06	0	4.77e-06	2.73e-06	9.22e-06	2.39e-06	3.09e-06
Candidatus_Ruthia_magnifica	6.86e-05	3.09e-06	5.96e-06	2.72e-06	3.53e-05	1.29e-05	4.06e-05	2.56e-05	4.27e-05	2.09e-05	3.92e-05	3.38e-05	1.64e-06	0.000101841	1.51e-05	3.27e-06	1.89e-05	2.52e-05	3.48e-05	6.64e-06	3.29e-06	7.3e-06	4.75e-05	1.08e-05	1.3e-05	0	2.47e-06	9.79e-06	7.87e-06	3.62e-05	6.77e-05	2.84e-06	1.26e-05	7.52e-06	1.31e-05	4.08e-05	9.2e-06	7.06e-06	2.42e-07	1.39e-05	5.41e-05	6.19e-05	5.79e-07	6.97e-06	1.61e-05	5.64e-06	3.37e-05	3.94e-05
Candidatus_Saccharimonas_aalborgensis	9.54e-05	3.16e-05	0.000126113	1.68e-05	4.72e-05	5.51e-05	0.000119302	6.27e-05	0.000119471	4.89e-05	6.07e-05	2e-05	8.75e-06	5.68e-05	2.49e-05	0.000121976	6.61e-05	2.82e-05	3.45e-05	5.38e-05	1.5e-05	5.55e-05	6e-05	5.74e-05	1.96e-05	1.33e-05	0.0011011	0.000129332	2.64e-05	3.18e-05	2.2e-05	4.11e-06	2.99e-05	0.0003315	7.52e-05	7.47e-05	2.33e-05	0.000105643	1.73e-05	4.94e-05	0.000169337	2.74e-05	2.66e-05	2.42e-05	1.8e-05	3.93e-05	7.94e-05	8.89e-05
Candidatus_Solibacter_usitatus	0.000711971	0.00013147	0.000374652	0.000147523	0.000488029	0.000288428	0.000367311	0.000270496	0.000386621	0.000123708	0.000559344	0.000315524	0.000119956	0.000566604	0.000274147	0.000170984	0.00013794	0.00101882	0.000186612	0.00040834	0.000283488	0.000268	0.000541949	0.000110143	0.000150464	8.4e-05	0.000130997	0.000103466	0.000506327	0.000253851	0.000198687	0.000178236	0.000296952	0.000180283	0.000145869	0.000900385	0.00011502	0.00010488	5.8e-05	0.000249044	0.000225602	0.000209505	0.000137688	0.000150086	0.000191374	0.000284602	0.000730153	0.00053957
Candidatus_Sulcia_muelleri	0.000328019	8.6e-05	0.000491222	0.000112105	0.001078	0.000342845	0.00259791	0.000810664	0.00185304	0.000403008	0.000504679	0.000610807	0.000663951	0.00183004	0.000357221	0.00081027	0.00143424	0.000684277	0.000867738	0.000606872	0.00105551	0.000592561	0.00110708	0.000471258	0.000435363	0.000137085	0.000454394	0.000559274	0.000712341	0.000519355	0.00024664	0.000464147	0.000331223	0.000369711	0.000494866	0.0010202	0.000224387	0.00043746	0.0001577	0.000698891	0.000787713	0.000810794	0.000777532	0.000159811	0.00017984	0.000154853	0.000891571	0.000494428
Candidatus_Tremblaya_princeps	0	0	0	0	0	3.8e-07	0	0	0	2.16e-06	0	0	0	0	0	0	0	0	0	0	0	0	0	0	0	0	0	0	0	0	0	1.98e-06	3.93e-07	0	7.03e-08	0	5.06e-07	0	0	0	0	0	0	0	0	0	0	0
Candidatus_Uzinura_diaspidicola	6.32e-07	0	0	0	1.67e-06	1.65e-06	0	2.47e-06	0	2.4e-06	0	9.53e-07	7.29e-06	1.23e-06	0	0	2.49e-06	0	2.08e-06	1.81e-06	2.88e-06	2.84e-06	4.45e-06	6.85e-07	1.96e-06	2.66e-06	1.59e-06	0	1.16e-07	0	1.24e-06	1.25e-06	5.11e-06	0	5.34e-06	7.12e-06	1.69e-07	0	0	1.74e-06	1.62e-06	0	7.81e-06	0	7.44e-07	0	2.08e-06	7.13e-07
Candidatus_Zinderia_insecticola	2.53e-06	9.98e-07	4.01e-06	3.13e-07	2.44e-05	1.03e-05	3.96e-06	2.23e-05	2.9e-05	6.71e-06	1.1e-05	1.91e-06	8.2e-06	3.39e-05	1.23e-05	8.82e-05	1.37e-05	2.24e-05	8.84e-06	4.23e-06	4.74e-06	1.42e-05	1.69e-05	1.52e-05	1.14e-05	9.63e-06	6.08e-06	9.09e-06	2.83e-06	5.04e-06	1.03e-05	6.07e-06	2.86e-05	8.42e-06	2.3e-05	2e-05	3.8e-06	8.59e-07	2.42e-07	4.36e-06	5.57e-05	2.91e-06	1.1e-05	5.5e-07	3.72e-06	1.02e-06	1.92e-05	2.14e-06
Capnocytophaga_canimorsus	0.000112816	1.39e-05	1.63e-05	4.7e-06	2.03e-05	2.46e-05	1.29e-05	3e-05	0.000143946	3.04e-05	4.97e-05	1.83e-05	1.8e-05	0.000155538	2.62e-05	0.000110541	5.24e-05	3.34e-05	3.12e-05	3.16e-05	2.99e-05	9.37e-05	7.24e-05	3.01e-05	1.46e-05	9.63e-06	1.59e-05	0.000139818	5.84e-05	5.67e-06	3.05e-05	2.48e-05	8.05e-06	1.7e-05	4.58e-05	9.81e-05	1.52e-05	3.94e-05	3.14e-06	2.64e-05	4.27e-05	2e-05	7.64e-05	1.58e-05	1.48e-05	4.24e-05	1.7e-05	5.13e-05
Capnocytophaga_ochracea	0.000147577	2.17e-05	6.95e-05	4.9e-05	6.22e-05	6.67e-05	0.000951938	0.000424987	3.32e-05	5.08e-05	0.0002678	4.83e-05	0.000244287	0.000328976	0.000135381	0.000129055	0.000143756	5.62e-05	0.000111586	7.69e-05	0.000995192	8.05e-05	7.45e-05	7.82e-05	4.01e-05	8.2e-05	0.000157161	0.000113952	0.00013283	4.98e-05	9.38e-05	7.61e-05	5.52e-05	0.00015176	0.000560243	9.3e-05	5.74e-05	6.18e-05	7.46e-05	4.27e-05	7.63e-05	7.96e-05	3.07e-05	0.000123482	5.79e-05	4.52e-05	9.39e-05	7.25e-05
Carboxydothermus_hydrogenoformans	2.37e-05	9.32e-06	2.68e-05	1.36e-05	4.53e-05	2.03e-05	2.08e-05	2.2e-05	3.44e-05	6.64e-05	3.81e-05	1.79e-05	3.1e-06	7.47e-05	1.94e-05	0.000137768	6.09e-05	2.32e-05	3.4e-05	2.92e-05	1.71e-05	5.45e-05	4.19e-05	2.44e-05	4.14e-05	2.36e-05	1.33e-05	2.52e-05	1.38e-05	1.73e-05	2.91e-05	2.44e-05	2.2e-05	2.11e-05	4.5e-05	8.73e-05	3.26e-05	1.07e-05	1.05e-05	6.97e-05	6.87e-05	8.04e-05	2.31e-05	3.58e-05	2.96e-05	2.45e-05	5.86e-05	5.35e-05
Cardinium_endosymbiont_of_Encarsia_pergandiella	0.000114396	3.23e-06	2.49e-06	2.36e-05	3.97e-05	1.63e-05	4.01e-05	5.47e-05	2.28e-05	3e-05	3.15e-05	5.72e-06	4.05e-05	0.000163562	2.37e-05	6.86e-05	0.000140848	3.36e-05	3.27e-05	6.85e-05	1.38e-05	4.64e-05	4.1e-05	3.6e-05	2.68e-05	3.83e-05	1.34e-05	5.52e-05	4.91e-05	5.39e-05	4.92e-05	3.06e-05	1.01e-05	7.79e-06	2.87e-05	5.39e-05	3.46e-05	2.69e-05	3.74e-06	7.03e-05	2.65e-05	0.000107247	2.6e-06	4.07e-05	6.39e-05	2.82e-06	5.62e-05	6.06e-05
Carnobacterium_maltaromaticum	2.21e-05	1.13e-05	2.37e-05	1.93e-05	7.28e-05	4.66e-05	5.89e-05	7.59e-05	0.000168836	4.87e-05	8.5e-05	1.93e-05	1e-05	9.01e-05	5.54e-05	0.000145391	5.32e-05	1.3e-05	4.3e-05	4.61e-05	6.79e-06	4.3e-05	5.13e-05	3.3e-05	2.39e-05	1.65e-05	1.34e-05	8.74e-05	1.11e-05	1.76e-05	4.8e-05	2.58e-05	6.9e-05	2.55e-05	7.27e-05	0.000102189	1.25e-05	1.61e-05	1.16e-05	5.35e-05	5.73e-05	4.34e-05	1.39e-05	1.69e-05	2.07e-05	2.55e-05	5.66e-05	2.38e-05
Carnobacterium_sp._17-4	5.85e-05	1.97e-05	4.02e-05	5.59e-05	8.89e-05	0.000173703	0.000242564	0.000125902	0.000345968	0.000100452	7.73e-05	1.19e-05	2.55e-05	0.000253058	0.000122766	0.000198756	7.21e-05	4e-05	7.14e-05	2.64e-05	2.76e-05	5.21e-05	9.58e-05	4.07e-05	4.49e-05	2.75e-05	3.11e-05	0.000164287	4.48e-05	3.31e-05	0.000148482	3.46e-05	8.74e-05	3.52e-05	0.000116203	0.00014354	1.86e-05	2.1e-05	4.47e-06	0.000122923	5.68e-05	0.000115145	1.71e-05	5.5e-06	9.53e-05	2.55e-05	9.36e-05	4.37e-05
Catenulispora_acidiphila	0.00036752	0.000399768	0.000193995	5e-05	0.000265541	0.000200563	0.000249494	0.000449178	0.000410267	0.000421469	0.000313078	0.000290759	0.000246475	0.000313545	6.03e-05	0.000106729	7.23e-05	0.000475314	0.000139829	0.0002235	0.000210609	0.000212454	0.000214297	4.82e-05	0.000328746	0.000658694	0.000218916	0.000250275	0.00039658	0.000270543	0.000144491	0.0003357	0.000196593	0.000500192	0.000264182	0.000581446	4.85e-05	9.45e-05	3.19e-05	0.000378941	0.000238586	0.000238395	0.000276822	0.000160361	0.000216428	0.000418321	0.000323527	0.000346171
Caulobacter_segnis	7.14e-05	3.94e-05	4.12e-05	2.49e-05	5.58e-05	9.8e-05	8.51e-05	0.000106384	0.000240601	5.75e-05	7.18e-05	5.5e-05	3.19e-05	3.02e-05	3.42e-05	1.36e-05	3.05e-05	9.84e-05	5.48e-05	5.26e-05	4.16e-05	4.97e-05	6.65e-05	8.22e-06	4.34e-05	5.08e-05	2.4e-05	2.31e-05	8.33e-05	4.19e-05	9.22e-05	4.62e-05	2.76e-05	9.14e-05	8.58e-05	0.000206243	2.03e-05	2.36e-05	1.07e-05	6.22e-05	9.74e-06	4.39e-05	3.12e-05	2.59e-05	4.63e-05	7.4e-05	4.49e-05	6.8e-05
Caulobacter_sp._K31	6.54e-05	4.61e-05	4.25e-05	2.77e-05	7.47e-05	5.22e-05	0.000146033	5.17e-05	6.02e-05	4.82e-05	9.11e-05	4.45e-05	3.7e-05	0.000120357	3.63e-05	4.57e-05	7.5e-05	6.36e-05	5.7e-05	3.56e-05	3.23e-05	4.07e-05	5.5e-05	2.89e-05	4.93e-05	4.7e-05	1.9e-05	6.22e-05	6.65e-05	2.74e-05	5.13e-05	4.87e-05	3.5e-05	4.52e-05	5.9e-05	0.000165909	4.06e-05	6.02e-05	1.78e-05	6.77e-05	5.52e-05	5.88e-05	7.64e-05	5.25e-05	4.92e-05	6.08e-05	9.18e-05	5.42e-05
Caulobacter_vibrioides	8.28e-05	7.25e-05	9.6e-05	3.12e-05	9.58e-05	4.98e-05	0.000111381	5.61e-05	8.55e-05	8.65e-05	0.000171171	6.17e-05	2.42e-05	6.97e-05	3.54e-05	4.52e-05	4.74e-05	9.74e-05	4e-05	5.94e-05	5.39e-05	5.11e-05	8.88e-05	3.04e-05	6.85e-05	0.000132904	0.000124742	0.000119545	0.000101705	2.77e-05	3.94e-05	9.01e-05	7.07e-05	7.5e-05	6.9e-05	0.000252677	4.15e-05	5.01e-05	2.49e-05	0.00010665	7.2e-05	6.82e-05	6.68e-05	4.95e-05	9.18e-05	9.64e-05	0.000135878	0.000132101
Cellulomonas_fimi	0.000196558	0.000147675	7.73e-05	2.96e-05	9.19e-05	0.000105476	0.000149993	0.000273245	0.000238112	0.000165902	0.000200436	0.000142403	8.6e-05	0.000124678	5.14e-05	4.79e-05	4.55e-05	0.000268752	9.2e-05	0.000129066	0.000133818	8.62e-05	0.0001075	1.22e-05	9.16e-05	0.000162298	9.64e-05	0.000132827	0.000185244	9.26e-05	7.11e-05	0.000170491	0.000125105	0.000180102	0.000161229	0.000160995	2.34e-05	5.92e-05	2.96e-05	0.000210975	0.000105497	0.000123874	0.000129589	5.54e-05	0.000100338	0.000207111	0.000148648	0.000175818
Cellulomonas_flavigena	0.000272401	0.000272291	0.00013533	4.18e-05	0.000160269	0.000154762	0.000166329	0.000385402	0.000380399	0.000254607	0.000158472	0.000232178	0.000161886	0.000128381	5.17e-05	1.8e-05	4.99e-05	0.000319143	3.74e-05	0.00020115	0.000154611	0.000142312	0.000154106	3.55e-05	0.000168458	0.000236922	0.000175309	0.000105563	0.00033005	0.000171019	8.26e-05	0.000256665	0.000173026	0.000268568	0.000222424	0.000248102	2.4e-05	6.56e-05	1.96e-05	0.000276069	9.52e-05	0.000105376	0.000266119	6.59e-05	0.000157515	0.000344673	0.000189662	0.000300078
Cellulophaga_algicola	2.75e-05	1.36e-06	5.1e-06	7.31e-07	1.97e-05	6.46e-06	2.87e-05	1.32e-05	1.33e-05	1.27e-05	1.71e-05	1.29e-05	1.55e-05	6.05e-05	5.23e-06	2.89e-05	2.2e-05	2.08e-05	2.04e-05	1.13e-05	3.29e-06	1.2e-05	3.14e-05	7.53e-06	5.17e-06	4.31e-06	2.33e-05	2.8e-05	5.9e-06	2.24e-05	2.49e-05	5.14e-06	8.94e-06	1.54e-05	9.14e-06	1.36e-05	9.7e-06	3.63e-06	4.71e-06	1.16e-06	9.74e-06	1.27e-05	7.23e-06	3.67e-06	4.46e-06	1.01e-05	3.61e-05	2.35e-05
Cellulophaga_lytica	2.02e-05	3.86e-06	1.13e-05	6.48e-06	4.25e-05	9.95e-06	8.42e-06	2.83e-05	1.58e-05	1.75e-05	4.75e-05	1.29e-05	6.22e-05	1.85e-05	2.92e-05	0.000130689	5.4e-05	1.1e-05	2.18e-05	9.06e-06	5.76e-06	1.93e-05	2.72e-05	1.37e-05	1.39e-05	1.5e-05	4.21e-05	2.17e-05	3.23e-05	9.13e-06	1.8e-05	9.37e-06	3e-05	2.26e-05	3.11e-05	2.85e-05	4.39e-06	6.87e-06	9.66e-06	1.25e-05	1.3e-05	5.2e-06	1.16e-06	2.02e-06	1.05e-05	1.73e-05	1.76e-05	1.59e-05
Cellulosilyticum_lentocellum	0.000299578	0.000117628	0.000264804	0.00024009	0.000493584	0.000332456	0.000659377	0.000416465	0.000466269	0.000395337	0.000396455	0.000279805	0.000282571	0.000415386	0.000315376	0.00112937	0.00593618	0.000242956	0.000573005	0.000408138	0.00026743	0.000248134	0.000316878	0.000318373	0.000353151	0.00124479	0.000254947	0.00103536	0.000157707	0.000377942	0.000205541	0.000363965	0.000566703	0.000510424	0.000657185	0.00410859	0.00100025	0.00033592	0.000245727	0.000225214	0.000808812	0.000930927	0.000271615	0.000752266	0.000337851	0.0001952	0.000577542	0.00028511
[Cellvibrio]_gilvus	0.000347295	0.00021183	0.000124486	5.62e-05	0.000158325	0.000149947	0.000137123	0.000348841	0.000370858	0.000263238	0.000180006	0.000234321	0.000115763	0.000117888	9.82e-05	1.96e-05	0.000104286	0.00044552	5.23e-05	0.000208197	0.00019558	0.000135419	0.000152467	3.08e-05	0.000114477	0.000189538	0.000156633	0.000143314	0.000327967	0.000178892	7.68e-05	0.000237084	0.000144548	0.000233435	0.000200069	0.000223359	2.6e-05	6.1e-05	1.34e-05	0.000197898	6.44e-05	8.69e-05	0.000192358	6.29e-05	0.00013457	0.000380665	0.000229419	0.000357575
Cellvibrio_japonicus	6.92e-05	1.18e-05	3.8e-06	1.84e-05	2.81e-05	6.21e-06	0.000227713	2.75e-06	2.16e-05	4.08e-06	4.91e-05	8.81e-06	5.83e-06	5.37e-05	1.54e-05	6.37e-05	5.82e-06	2.14e-05	2.76e-05	1.69e-05	2.33e-05	4.26e-06	2.83e-05	1.63e-05	2.24e-05	8.87e-06	3.35e-06	2.1e-06	7.12e-06	7.56e-06	2.8e-05	1.84e-05	7.56e-06	1.36e-05	2.18e-05	1.63e-05	1.76e-05	8.02e-06	5.43e-06	8.14e-06	5.19e-05	5.47e-05	1.27e-05	1.39e-05	5.09e-06	4.48e-06	2.03e-05	2.68e-05
Cenarchaeum_symbiosum	1.58e-06	2.33e-07	0	6.27e-07	3.06e-06	4.69e-06	0	1.1e-06	0	9.59e-07	0	0	0	0	6.15e-07	0	0	1e-06	1.73e-06	2.42e-06	0	1.22e-06	2.81e-06	2.74e-07	0	0	3.52e-07	0	2.31e-07	0	2.72e-06	1.29e-06	0	0	6.68e-06	6.61e-06	7.59e-07	0	0	1.13e-05	0	4.16e-07	0	0	3.72e-06	1.02e-06	2.7e-06	7.13e-07
Chamaesiphon_minutus	5.02e-05	8.78e-06	7.48e-06	3.24e-06	1.56e-05	4.31e-06	1.68e-05	1.48e-05	7.47e-06	9.59e-07	2.43e-05	7.14e-06	6.02e-06	4.07e-05	6.34e-05	3.27e-05	3.91e-05	3.3e-05	0.000115571	2.21e-05	5.15e-06	6.69e-06	3.84e-05	1.6e-05	1.63e-05	6.08e-06	3.88e-06	1.4e-06	2.78e-06	1.01e-05	4.76e-06	5.41e-06	9.82e-07	2.35e-06	8.47e-06	3.8e-05	6.24e-06	3.63e-06	4.83e-07	0	0.000184485	2.64e-05	2.89e-06	4.04e-06	3.47e-06	6.4e-06	3.86e-05	2.28e-05
Chelativorans_sp._BNC1	8.03e-05	2.9e-05	2.83e-05	0.000168209	8.56e-05	0.000155965	9.01e-05	9.24e-05	0.00014519	2.42e-05	3.53e-05	2.62e-05	1.17e-05	6.48e-05	3.88e-05	1.96e-05	4.51e-05	5.42e-05	2.91e-05	3.3e-05	3.64e-05	3.06e-05	0.000104689	3e-05	7.46e-05	5.63e-05	2.29e-05	7.34e-05	5.21e-05	2.58e-05	5.09e-05	3.56e-05	2.65e-05	1.27e-05	6.65e-05	6.51e-05	2.14e-05	3.1e-05	1.11e-05	4.3e-05	3.57e-05	5.65e-05	1.68e-05	3.78e-05	3.82e-05	3.16e-05	6.84e-05	4.21e-05
Chitinophaga_pinensis	0.000185498	2.48e-05	7.62e-05	4.12e-05	0.000179435	0.000104083	0.000559876	0.000114631	0.000338086	6.71e-05	0.000207614	3.21e-05	0.000241735	0.000609809	8.34e-05	9.37e-05	0.000140225	7.58e-05	0.00012978	8.62e-05	0.000124759	7.2e-05	0.000113589	7.55e-05	7.45e-05	5.37e-05	0.000141128	0.000106262	0.000145557	9.17e-05	0.000285744	7.28e-05	8.35e-05	8.61e-05	7.32e-05	0.000182009	6.5e-05	3.55e-05	6.83e-05	8.92e-05	9.2e-05	0.000186227	4.25e-05	3.17e-05	0.000228334	8.65e-05	0.000231998	3.68e-05
Chlamydia_muridarum	1.01e-05	0	4.34e-07	0	6.11e-06	1.71e-06	1.39e-05	1.65e-06	9.13e-06	1.44e-06	6.63e-06	5.24e-06	3.28e-06	7.41e-06	0	1.63e-06	0	2.4e-06	1.39e-06	0	0	2.43e-06	5.86e-06	1.1e-06	1.65e-06	0	9.69e-07	0	5.21e-07	1.89e-06	1.08e-05	8.14e-07	0	0	1.58e-06	3.39e-07	2.03e-06	0	0	4.07e-06	2.16e-06	1.66e-06	0	0	0	0	4.66e-06	7.6e-06
Chlamydia_pecorum	1.07e-05	1.26e-06	4.23e-06	4.6e-06	6.94e-06	7.48e-06	2.48e-05	1.29e-05	5.14e-05	1.25e-05	5.52e-06	3.1e-06	4.56e-06	2.96e-05	1.35e-05	1.2e-05	1.31e-05	8e-06	1.02e-05	6.24e-06	1.11e-05	1.07e-05	5.86e-06	4.38e-06	8.07e-06	3.17e-06	5.64e-06	2.1e-06	3.01e-06	1.67e-05	6.85e-06	4.43e-06	1.05e-05	6.16e-06	6.15e-06	4.73e-05	7.76e-06	9.54e-06	1.69e-06	3.49e-06	1.46e-05	9.56e-06	2.31e-06	9.17e-07	6.08e-06	3.96e-05	1.82e-05	5.23e-06
Chlamydia_pneumoniae	0	1.56e-06	0	0	0	0	0	0	0	0	0	0	0	1.3e-05	9.54e-06	2.07e-05	8.73e-06	2.4e-06	0	2.62e-06	0	0	0	4.38e-06	3.31e-06	3.04e-06	0	5.59e-06	0	0	1.88e-07	2.71e-07	1.58e-05	9.05e-07	3.83e-06	7.46e-06	0	5.73e-07	0	0	3.25e-06	0	6.94e-06	0	5.21e-06	0	6.29e-07	0
Chlamydia_psittaci	0	0	1.08e-06	0	1.11e-06	0	0	0	0	0	4.97e-06	4.76e-06	1.28e-06	0	3.08e-06	5.12e-05	2.33e-05	0	5.2e-07	8.05e-07	0	0	4.68e-07	2.74e-07	4.14e-07	4.43e-06	0	1.4e-06	0	0	2.82e-07	4.8e-07	9.82e-07	1.81e-07	6.89e-06	3.56e-06	6.75e-07	0	0	0	0	0	0	0	2.23e-06	0	1.01e-06	3.33e-06
Chlamydia_trachomatis	0	0	0	0	0	0	0	0	0	1.44e-06	0	1.43e-06	0	0	0	0	0	0	0	0	0	0	0	0	0	0	0	0	0	0	2.82e-07	6.89e-07	0	9.96e-07	0	0	0	0	0	0	0	0	0	0	0	0	0	0
Chlamydophila_abortus	3.16e-06	0	0	4.18e-07	1.44e-05	8.24e-06	0	0	2.99e-05	2.4e-06	8.28e-06	0	0	0	4.31e-06	0	1.25e-06	0	3.47e-07	0	3.09e-06	7.1e-06	0	5.48e-07	1.03e-06	0	2.11e-06	0	7.46e-06	2.14e-05	1.18e-05	1.25e-07	3.04e-06	1.45e-06	1.55e-06	0	0	0	0	0	9.2e-06	3.74e-06	0	0	2.48e-06	0	2.52e-06	9.27e-06
Chlamydophila_caviae	3.16e-06	1.26e-06	3.14e-06	9.4e-07	1.03e-05	2.22e-06	4.85e-05	0	8.3e-07	6.71e-06	3.15e-05	2.38e-06	1.82e-06	6.17e-06	0	5.77e-05	1.68e-05	0	6.06e-06	2.01e-06	0	1.62e-05	2.97e-05	0	2.07e-06	1.9e-06	4.05e-06	1.33e-05	2.95e-06	1.32e-05	4.53e-06	3.17e-06	1.24e-05	3.62e-06	9.46e-06	8.81e-06	0	1.72e-06	1.21e-06	8.14e-06	1.95e-05	2.91e-06	0	0	9.55e-06	0	6.61e-06	3.09e-06
Chlamydophila_felis	3.16e-06	1.63e-06	2.39e-06	7.1e-06	2.22e-06	4.31e-06	0	1.37e-06	0	0	0	1.67e-06	0	0	1.11e-05	2.45e-05	1.87e-05	2.4e-06	6.76e-06	3.83e-06	1.24e-06	5.27e-06	5.86e-06	6.44e-06	4.65e-06	3.8e-07	3.52e-07	0	4.63e-07	1.26e-06	4.84e-06	2.71e-07	4.91e-06	0	3.48e-06	1.02e-06	4.05e-06	2.67e-06	2.42e-07	2.32e-06	9.74e-06	4.78e-06	5.79e-07	2.57e-06	1.61e-06	1.54e-06	2.2e-06	4.75e-07
Chlorobaculum_parvum	0.000132724	5.98e-05	6.32e-05	8.51e-05	0.000127215	0.000126698	0.000195536	0.000106659	0.000193311	6.21e-05	0.000172276	7.69e-05	3.72e-05	0.000416003	6.18e-05	9.2e-05	0.000106779	0.000107981	0.000102056	7.25e-05	8.54e-05	8.74e-05	0.000135604	5.7e-05	6.37e-05	9.45e-05	7.94e-05	0.000101368	0.000109978	5.1e-05	8.45e-05	7.67e-05	6.91e-05	5.56e-05	0.000121933	0.000418926	5.88e-05	0.000100203	4.23e-05	0.000136582	7.57e-05	0.000104753	9e-05	5.67e-05	0.000113981	8.97e-05	0.000172112	0.000128062
Chlorobaculum_tepidum	0.000237956	4.97e-05	0.000147909	7.13e-05	0.000191656	0.000126128	0.000169794	0.000136073	0.000144361	9.69e-05	0.000302587	0.000135259	8.73e-05	0.000351196	4.62e-05	4.9e-05	0.000115504	0.000243956	7.23e-05	0.00015202	0.000122906	0.000113322	0.000202118	6.27e-05	5.64e-05	9.7e-05	0.000140247	0.000129332	0.000274395	0.000122201	9.54e-05	0.000117655	0.000141995	0.000144878	9.61e-05	0.000552975	4.68e-05	6.22e-05	2.49e-05	0.000133676	8.55e-05	0.000138631	8.88e-05	8.09e-05	0.000108648	0.000184312	0.000340323	0.000199339
Chlorobium_chlorochromatii	1.26e-05	7.69e-06	1.18e-05	5.54e-06	1.72e-05	1.28e-05	2.28e-05	1.29e-05	6.18e-05	1.63e-05	3.31e-05	3.95e-05	5.25e-05	2.47e-06	1.02e-05	6.64e-05	2.68e-05	5.6e-06	1.14e-05	1.03e-05	2.24e-05	7.5e-06	1.17e-05	1.03e-05	1.32e-05	2.7e-05	2.02e-05	9.79e-06	4.51e-05	1.35e-05	1.25e-05	3.28e-05	3.33e-05	4.04e-05	1.51e-05	4.88e-05	1.11e-05	1.06e-05	1.51e-05	1.05e-05	1.51e-05	1.73e-05	1.59e-05	2.15e-05	2.31e-05	4.1e-06	4.33e-05	1.5e-05
Chlorobium_limicola	0.000131776	4.23e-05	9.4e-05	4.12e-05	7.69e-05	0.000108517	0.000188111	0.000102536	0.000110345	9.66e-05	6.57e-05	8.76e-05	0.000174647	0.000164797	7.08e-05	0.000139946	8.27e-05	8.14e-05	9.41e-05	7.01e-05	7.47e-05	0.00010866	0.000126704	5.01e-05	9.36e-05	9.36e-05	7.73e-05	7.9e-05	0.000126408	3.02e-05	8.48e-05	5.66e-05	9.18e-05	6.65e-05	8.81e-05	0.000219461	6.84e-05	6.45e-05	3.2e-05	0.000161573	0.00012822	0.00016565	4.05e-05	5.96e-05	6.14e-05	5.39e-05	0.00021797	8.84e-05
Chlorobium_phaeobacteroides	7.87e-05	2.45e-05	3.63e-05	4.86e-05	6.03e-05	3.67e-05	8.96e-05	6.3e-05	3.07e-05	1.97e-05	6.96e-05	5.86e-05	6.27e-05	0.00011974	7.75e-05	7.51e-05	0.000107817	0.000105181	7.9e-05	7.49e-05	3.89e-05	5.45e-05	7.33e-05	5.22e-05	4.3e-05	3.32e-05	2.85e-05	4.54e-05	3.64e-05	1.26e-05	5.26e-05	3.82e-05	2.94e-05	3.51e-05	3.37e-05	8.15e-05	4.93e-05	3.08e-05	2.54e-05	5.29e-05	0.00010712	5.88e-05	0.000139423	3.78e-05	2.26e-05	3.36e-05	0.000143678	4.4e-05
Chlorobium_phaeovibrioides	4.68e-05	1.42e-05	4.65e-05	1.36e-05	0.000112772	0.000214247	0.000122767	0.000126177	0.000574539	9.21e-05	0.000108224	2.52e-05	2.64e-05	0.000122826	3.05e-05	0.000400778	0.000199846	7.88e-05	4.68e-05	4.95e-05	0.000106642	3.04e-05	0.000121318	1.47e-05	2.48e-05	4e-05	7.02e-05	5.24e-05	0.000101705	2.83e-05	0.000172704	5.49e-05	3.2e-05	8.35e-05	0.000167099	0.000658893	5.03e-05	2.3e-05	8.09e-06	0.000231608	1.41e-05	4.68e-05	1.56e-05	2.83e-05	0.000130849	5.66e-05	0.000130342	6.2e-05
Chloroflexus_aggregans	2.05e-05	1.03e-05	9.11e-06	8.15e-06	1.36e-05	8.24e-06	4.36e-05	4.4e-06	1.74e-05	1.63e-05	2.82e-05	2.14e-06	6.02e-06	1.36e-05	8.62e-06	1.74e-05	7.48e-06	1.66e-05	1.96e-05	1.35e-05	3.5e-06	1.24e-05	1.69e-05	5.07e-06	1e-05	2.57e-05	1.03e-05	9.79e-06	1.88e-05	1.86e-05	1.76e-05	1.38e-05	9.33e-06	1.32e-05	1.6e-05	1.39e-05	1.09e-05	1.02e-05	4.83e-06	2.18e-05	5.14e-05	1.91e-05	2.2e-05	1.52e-05	9.3e-06	1.01e-05	2.29e-05	1.69e-05
Chloroflexus_sp._Y-400-fl	1.2e-05	9.98e-07	4.34e-07	0	4.72e-06	1.2e-06	0	3.57e-06	0	3.6e-06	2.21e-06	8.57e-06	4.56e-05	0	8.92e-06	8.71e-06	6.23e-06	8e-07	1.49e-05	1.89e-05	9.06e-06	2.03e-06	3.98e-06	1.37e-06	3.31e-06	1.85e-05	2.96e-05	1.4e-06	1.34e-05	1.89e-05	3.47e-06	2.19e-06	1.67e-06	1.2e-05	7.03e-07	6.27e-06	7.51e-06	7.63e-07	3.14e-06	4.65e-06	1.24e-05	4.16e-07	0	9.54e-06	1.22e-05	2.56e-06	3.23e-05	7.13e-06
Chloroherpeton_thalassium	9.29e-05	2.15e-05	3.99e-05	5.28e-05	4.14e-05	4.83e-05	0.000182665	6.19e-05	2.45e-05	5.59e-05	0.000143563	3.02e-05	0.0002184	0.000111099	4.52e-05	4.9e-05	0.000148119	3.6e-05	6.31e-05	4.99e-05	7.95e-05	4.56e-05	4.38e-05	4.1e-05	2.9e-05	9.69e-05	9.42e-05	7.9e-05	4.66e-05	4.28e-05	3.37e-05	4.39e-05	3.61e-05	7.62e-05	3.78e-05	0.000214208	2.04e-05	1.8e-05	5.11e-05	6.19e-05	6.38e-05	4.8e-05	2.43e-05	3.45e-05	4.75e-05	2.89e-05	7.92e-05	4.11e-05
Chromobacterium_violaceum	0.000100491	6.42e-05	8.27e-05	9.07e-05	0.000153047	9.89e-05	0.000232168	0.000110233	0.000252631	0.00014001	0.000186632	7.95e-05	6.76e-05	0.000131467	4e-05	6.75e-05	9.02e-05	0.00010938	8.13e-05	7.69e-05	9.53e-05	8.39e-05	0.000112652	4.16e-05	8.56e-05	0.000152162	0.000108181	0.00010766	0.000124615	5.32e-05	8.02e-05	0.000114315	0.000121471	8.51e-05	0.000151458	0.000401301	5.67e-05	7.2e-05	7.92e-05	0.0001113	0.000104415	0.000124082	0.000106159	0.000117977	0.000103935	0.000151139	0.00016148	0.000105966
Chromohalobacter_salexigens	6.16e-05	3.03e-05	0.000139776	1.29e-05	0.000109438	0.000100535	6.44e-05	0.000172084	0.000144361	8.37e-05	9.17e-05	0.000123828	2.97e-05	0.000223432	5.91e-05	1.63e-05	2.45e-05	0.000196565	2.18e-05	0.000188867	7.86e-05	8.9e-05	0.000157385	3.27e-05	3.88e-05	8.25e-05	0.00010959	8.18e-05	0.000254494	9.42e-05	4.96e-05	9.54e-05	0.000132862	0.000108749	6.63e-05	0.000338428	2.51e-05	3.21e-05	1.23e-05	7.26e-05	5.84e-05	6.46e-05	6.71e-05	5.85e-05	0.000120183	0.000219023	0.000256406	0.000138753
Chroococcidiopsis_thermalis	3.57e-05	3.05e-05	2.14e-05	5.22e-06	1.69e-05	7.22e-06	2.18e-05	3.02e-06	1.49e-05	4.96e-05	8.83e-06	9.76e-06	5.12e-05	2.59e-05	4.92e-06	2.83e-05	2.85e-05	7.86e-05	2.44e-05	1.19e-05	2.59e-05	9.93e-06	2.65e-05	1.81e-05	3.12e-05	6.83e-05	5.47e-05	0.000105563	2.88e-05	3.43e-05	1.68e-05	1.67e-05	2.89e-05	3.85e-05	1.34e-05	6.29e-05	5.15e-06	2.86e-06	2.69e-05	2.03e-05	8.39e-05	1.64e-05	1.19e-05	1.21e-05	2.7e-05	1.67e-05	3.5e-05	2.49e-05
Chthonomonas_calidirosea	3.03e-05	2.68e-05	1.67e-05	2.72e-05	8.56e-05	6.27e-05	9.55e-05	7.04e-05	0.000132746	5.23e-05	0.000129207	7.98e-05	0.000136728	0.000215408	5.42e-05	5.28e-05	2.72e-05	9e-06	4.75e-05	2.8e-05	4.43e-05	2.31e-05	6.67e-05	1.75e-05	3.43e-05	2.74e-05	0.000121835	9.58e-05	0.00010292	2.14e-05	2.5e-05	0.000101246	1.81e-05	9.88e-05	0.000116871	0.000361476	2.23e-05	2.25e-05	2.04e-05	2.38e-05	2.22e-05	4.97e-05	7.03e-05	3.83e-05	4.38e-05	3.82e-05	6.65e-05	1.66e-05
Citrobacter_koseri	5.25e-05	1.67e-05	1.42e-05	3.54e-05	4.83e-05	1.86e-05	7.08e-05	1.54e-05	2.7e-05	8.15e-06	6.63e-06	1.17e-05	3.28e-06	4.26e-05	1.75e-05	4.3e-05	2.6e-05	3.4e-05	2.15e-05	2.01e-05	1.05e-05	1.09e-05	2.44e-05	9.32e-06	4.3e-05	1.22e-05	4.58e-06	2.24e-05	2.1e-05	2.52e-06	2.08e-05	1.22e-05	1.68e-05	1.13e-05	1.93e-05	2.83e-05	2.43e-05	1.84e-05	8.94e-06	2.7e-05	4.87e-05	1.75e-05	1.45e-06	2.59e-05	1.24e-05	1.63e-05	3.65e-05	1.33e-05
Citrobacter_rodentium	4.39e-05	2.13e-05	3e-05	2.4e-05	6.33e-05	2.38e-05	8.46e-05	1.29e-05	1.91e-05	2.54e-05	3.37e-05	1.86e-05	2.63e-05	5.18e-05	7.69e-06	3.16e-05	3.78e-05	2.72e-05	1.96e-05	2.56e-05	2.45e-05	2.37e-05	5.71e-05	8.77e-06	2.29e-05	2.18e-05	1.39e-05	7.69e-06	2.24e-05	1.07e-05	4.4e-05	2.07e-05	1.89e-05	2.45e-05	2.5e-05	9.12e-05	9.45e-06	7.83e-06	8.57e-06	9.12e-05	2.43e-05	1.58e-05	1.16e-05	1.87e-05	2.26e-05	1.42e-05	3.88e-05	3.16e-05
Clavibacter_michiganensis	0.000451263	0.000342069	0.000313601	9.65e-05	0.000372202	0.000273731	0.000395527	0.000449453	0.000636349	0.00035506	0.000403081	0.000394822	0.000188867	0.00059623	0.000147381	8.55e-05	0.000127345	0.000641485	0.000189904	0.000305248	0.000253224	0.000213468	0.00046068	5.97e-05	0.000174662	0.000343093	0.000254066	0.000197843	0.000522757	0.000204089	0.000154209	0.000342944	0.000336526	0.000303429	0.000367661	0.000725833	7.86e-05	0.00013036	4.53e-05	0.000318497	0.000136335	0.000200152	0.000290996	0.000162012	0.000237636	0.000504906	0.000595722	0.000545748
Clostridiales_genomosp._BVAB3	0.0013481	0.000451344	0.00068641	0.000415195	0.00100022	0.00065693	0.00196774	0.000607517	0.00101053	0.000618298	0.00138152	0.000966814	0.00025322	0.00208989	0.00429989	0.0013254	0.00255417	0.000680278	0.00115554	0.000702111	0.000593327	0.000912864	0.00132817	0.000429612	0.0010246	0.00058825	0.000337139	0.00112064	0.000462648	0.00124406	0.000772193	0.000336932	0.000703101	0.000619355	0.000879504	0.00155826	0.00065046	0.000986002	0.000416589	0.00150095	0.00196441	0.00116745	0.000829888	0.000804557	0.000874641	0.000496837	0.00163764	0.00131436
Clostridium_acetobutylicum	0.000103967	8.23e-05	0.000112992	9.37e-05	0.000125826	0.000102562	0.000245534	0.000158889	0.000315686	0.000162306	0.000283813	9.07e-05	3.48e-05	0.00017282	0.000117843	0.000467212	0.000299977	0.000126177	0.000180374	0.000149805	6.94e-05	0.00027915	0.00021781	9.41e-05	0.000126369	0.000179148	6.1e-05	0.000139818	6.75e-05	0.000234324	0.000145313	0.000123667	0.000252468	0.000109745	0.00025332	0.000463157	9.19e-05	4.74e-05	4.26e-05	0.000157214	0.000376544	0.000112027	0.000168928	9.49e-05	0.000105051	0.000148193	0.000257412	0.000109054
Clostridium_acidurici	0.000108391	2.19e-05	6.6e-05	3.57e-05	0.000106105	5.47e-05	9.95e-05	0.000109408	0.000253461	9.97e-05	0.000163441	5.91e-05	1.17e-05	0.000165414	8.46e-05	0.000407313	0.000202131	9.42e-05	0.000114705	8.86e-05	5.74e-05	0.000153056	0.000155277	6.73e-05	6.46e-05	3.88e-05	3.2e-05	8.46e-05	2.9e-05	6.87e-05	0.000115128	5.18e-05	0.000132666	5.22e-05	0.000137293	0.000185907	4.51e-05	4.29e-05	1.86e-05	4.79e-05	0.000201797	9.23e-05	4.25e-05	3.03e-05	6.9e-05	6.9e-05	0.000141728	8.72e-05
Clostridium_beijerinckii	7.55e-05	2.35e-05	3.42e-05	2.6e-05	8.14e-05	3.83e-05	9.06e-05	0.000182805	0.000181281	0.000109083	0.000152398	7.24e-05	2.01e-05	0.000170351	0.000131689	0.000549437	0.000679934	4.5e-05	8.52e-05	7.39e-05	4.65e-05	0.0001563	0.000104455	6.64e-05	7.39e-05	4.64e-05	3.8e-05	0.000211126	4.17e-05	0.000213852	5.22e-05	5.63e-05	0.000165661	5.93e-05	0.000181651	0.000270471	3.65e-05	3.06e-05	2.55e-05	8.46e-05	0.000221274	5.69e-05	4.69e-05	4e-05	4.24e-05	7.44e-05	0.000132166	5.68e-05
Clostridium_botulinum	0.000405441	0.000136894	0.000349603	0.000324404	0.000678852	0.000974055	0.000923722	0.000895331	0.00223676	0.00068135	0.000463267	0.000274089	0.000342002	0.000910393	0.000803979	0.00296718	0.00217629	0.000404927	0.000756672	0.000336055	0.000206285	0.000801366	0.000786926	0.000240561	0.000401444	0.000206135	0.000331854	0.000461401	0.000250155	0.000785804	0.00041019	0.000269211	0.000890561	0.000349519	0.000942245	0.000822938	0.000206497	0.000226651	0.000158908	0.000549814	0.00160734	0.000575932	0.000405543	0.000460166	0.00026331	0.000373236	0.000971524	0.000320986
Clostridium_cellulolyticum	8.03e-05	4.1e-05	6.42e-05	2.87e-05	0.000121382	5.14e-05	0.000130192	0.000116005	0.00012113	9.35e-05	0.000327434	0.000166692	6.8e-05	0.000116654	9.97e-05	0.000132322	0.000160583	5.04e-05	0.000112799	4.21e-05	3.62e-05	7.05e-05	8.55e-05	8.49e-05	6.1e-05	7.11e-05	5.54e-05	0.000154499	6.74e-05	0.000132595	8.02e-05	5.87e-05	9.63e-05	9.96e-05	8.68e-05	0.000157944	4.92e-05	4.45e-05	3.12e-05	4.94e-05	0.00029431	0.000111611	5.03e-05	0.000131371	7.37e-05	5.12e-05	0.000276347	9.38e-05
Clostridium_cellulovorans	0.000174122	5.84e-05	0.000227068	7.38e-05	0.000173602	0.000219631	0.000156429	0.000200123	0.000478299	0.000290089	0.000157919	0.000114303	5.34e-05	0.000186399	0.000206764	0.000562506	0.000239732	8.34e-05	0.000224039	6.58e-05	6.24e-05	0.000229078	0.000176824	6.29e-05	0.000123991	8.24e-05	6.45e-05	0.000288026	0.00011073	0.000317156	0.00013975	0.00013494	0.000308147	0.000145784	0.000284322	0.000251321	5.83e-05	0.0001734	4.75e-05	0.000158667	0.00243455	0.000128655	0.000162854	0.000344758	9.2e-05	8.49e-05	0.000183938	9.6e-05
Clostridium_clariflavum	0.000191502	7.89e-05	0.000128824	9.14e-05	0.000165824	8.81e-05	0.000217317	8.91e-05	0.000188333	0.000144805	0.000202645	0.000159548	4.48e-05	0.0002438	0.000118458	0.000483548	0.000283981	0.00010958	0.000221093	0.000153027	0.000100672	0.000211643	0.00014708	0.000137953	0.000116442	7.55e-05	5.07e-05	0.000139119	6.86e-05	0.0001285	0.000119705	0.000118782	0.000215251	0.000108478	0.000200175	0.000318092	0.000112404	0.000136468	6.12e-05	0.000179881	0.000419284	0.000183109	0.000141738	0.000193204	0.000140523	0.000108999	0.000302139	0.000130913
[Clostridium]_difficile	0.000986268	0.000663307	0.000408809	0.00030006	0.000977447	0.000690252	0.00143014	0.00144182	0.00116899	0.000999969	0.00098672	0.000808218	0.000892013	0.00183066	0.00109536	0.00134119	0.00319089	0.000914235	0.000569193	0.00146523	0.000950724	0.000852655	0.00154294	0.000730313	0.000627296	0.000796159	0.00040418	0.000780187	0.000665364	0.000619509	0.000721494	0.00109281	0.000806405	0.000645704	0.00101961	0.00170231	0.000632317	0.00085841	0.000504375	0.00127718	0.00120159	0.00114376	0.000814557	0.000579979	0.00103439	0.000553706	0.00131072	0.000839648
Clostridium_kluyveri	0.000169381	5.49e-05	0.000108221	0.000104269	0.00017999	9.84e-05	0.000306917	0.00014432	0.000285403	0.000122988	0.000589161	0.000157643	4.54e-05	0.000319718	0.000106151	0.000447609	0.000385774	0.000104781	0.000232702	0.000189069	0.000113025	0.000214279	0.000251067	0.000156584	0.000135056	9.17e-05	6.13e-05	0.0001538	8.45e-05	0.000201569	0.000175075	8.75e-05	0.00015918	7.19e-05	0.000178171	0.000280978	0.000132573	8.42e-05	6.07e-05	0.000126411	0.000199633	0.000236525	0.000138556	9.85e-05	0.000219156	0.000121808	0.000243196	0.000172016
Clostridium_ljungdahlii	9.76e-05	4.08e-05	8.11e-05	9.2e-05	4.81e-05	0.000214247	6.88e-05	0.000149268	0.000272128	9.18e-05	0.000124237	6.72e-05	3.26e-05	9.32e-05	0.000104613	0.000361027	0.000180319	5.58e-05	0.00010015	5.01e-05	3.07e-05	0.000116363	9.42e-05	5.37e-05	8.9e-05	2.56e-05	4.86e-05	0.000113952	7.42e-05	9.04e-05	5.58e-05	6.65e-05	0.000169589	7.5e-05	0.000178628	0.000155233	4.79e-05	4.53e-05	4.09e-05	8.34e-05	0.000154188	7.81e-05	8.42e-05	7.89e-05	9.4e-05	4.07e-05	0.000187649	0.000113806
Clostridium_novyi	3.86e-05	1.53e-05	3.63e-05	2.69e-05	9.39e-05	3.26e-05	7.13e-05	4.67e-05	9.87e-05	9.88e-05	9e-05	4.81e-05	3.37e-05	0.00011974	2.43e-05	0.000465034	0.000209194	2.74e-05	8.2e-05	1.51e-05	1.98e-05	0.00012508	9.84e-05	4.37e-05	6.86e-05	2.39e-05	1.44e-05	0.000167083	3.42e-05	0.00012787	4.34e-05	3.6e-05	0.000166152	3.2e-05	0.000156133	4.71e-05	2.14e-05	2.35e-05	1.46e-05	4.36e-05	0.000192059	5.57e-05	5.29e-05	3.94e-05	3.99e-05	2.66e-05	7.83e-05	4.13e-05
Clostridium_pasteurianum	0.000157689	4.28e-05	7.06e-05	6.08e-05	9.39e-05	6.7e-05	0.000148508	0.000108034	3.48e-05	0.000118193	7.34e-05	9.91e-05	5.82e-05	0.000120974	0.000646752	0.000273357	0.000172632	0.000104581	0.000120596	6.48e-05	4.22e-05	0.000136027	0.000114292	5.26e-05	6.92e-05	0.000103511	7.4e-05	0.000453711	5.27e-05	0.000153696	0.000127075	8.69e-05	0.000146119	0.000136638	0.000179507	0.000185907	4.39e-05	4.01e-05	3.49e-05	0.000117983	0.000169878	0.000126576	6.25e-05	8.16e-05	7.85e-05	4.94e-05	0.000131726	0.000101452
Clostridium_perfringens	0.000117872	4.24e-05	8.45e-05	7.92e-05	0.000279429	0.000269804	0.000156924	0.000233111	0.000500285	0.000192514	0.000170067	8.19e-05	4.08e-05	0.00010863	0.00025384	0.0011811	0.00104036	0.000123578	0.000302184	9.56e-05	9.68e-05	0.000279961	0.000273785	0.00011576	0.000139502	0.000110986	5.48e-05	0.000415261	5.09e-05	0.000835566	0.000134117	8.9e-05	0.000321109	8.26e-05	0.000366431	0.000221495	5.81e-05	4.55e-05	4.2e-05	0.000376326	0.000808812	0.000130525	6.74e-05	6.37e-05	7.94e-05	8.06e-05	0.000284336	0.000130675
Clostridium_phage_phiSM101	0	0	0	0	0	0	0	0	0	0	0	0	0	0	0	0	0	0	0	0	0	0	0	0	0	0	0	0	0	0	0	0	0	0	0	0	0	0	0	0	0	0	0	0	0	0	0	0
Clostridium_phytofermentans	0.000264501	0.000249264	0.000364567	0.00035815	0.000446087	0.00048101	0.00101481	0.000588824	0.000581177	0.000803859	0.000851991	0.000503172	0.000523395	0.000566604	0.000466757	0.00171638	0.00378669	0.000414525	0.000866352	0.000627007	0.000416894	0.000299828	0.000374024	0.000320428	0.000531847	0.00162893	0.000383477	0.00244403	0.000356836	0.000375422	0.000300132	0.000823332	0.000910987	0.00105752	0.000868151	0.00130982	0.000414428	0.000597594	0.000533476	0.000449848	0.00115722	0.000539559	0.000271326	0.000927489	0.000550806	0.000241438	0.00106374	0.000321936
Clostridium_saccharobutylicum	0.000227843	3.65e-05	0.000113209	3.97e-05	0.000126937	5.44e-05	0.000135638	0.000123977	0.000238112	0.000153915	0.000106016	8.81e-05	5.54e-05	0.000159859	0.000139073	0.000801012	0.0010144	5.6e-05	0.000108467	6.18e-05	3.85e-05	0.000180424	0.000137009	0.000103156	8.33e-05	4.75e-05	4.99e-05	0.000409668	7.52e-05	0.00048408	7.33e-05	9.92e-05	0.000217215	0.000317827	0.000267486	0.000192855	6.71e-05	4.91e-05	2.29e-05	0.000133094	0.000723332	7.34e-05	5.21e-05	0.000115042	8.58e-05	9.63e-05	0.00018419	0.000107629
Clostridium_saccharolyticum	0.00666371	0.00763143	0.00533513	0.00662348	0.00681102	0.0056719	0.00832983	0.0172197	0.00563422	0.00981485	0.0192016	0.00996819	0.00612559	0.0103871	0.00293223	0.00566208	0.0041843	0.00346038	0.00405851	0.00209546	0.0032108	0.00356023	0.00822549	0.00139638	0.00596272	0.00807004	0.0146797	0.0149871	0.0130059	0.00221537	0.0118582	0.00777314	0.010525	0.011762	0.0162119	0.0147459	0.00248117	0.00341188	0.0038447	0.0121598	0.00476793	0.0142356	0.00611612	0.00812796	0.00744598	0.0112073	0.0138272	0.00370524
Clostridium_saccharoperbutylacetonicum	0.000100491	4.15e-05	7.68e-05	3.54e-05	0.000137492	9.21e-05	0.00017128	0.000213868	0.00036505	0.000154874	8.61e-05	0.000102635	2.26e-05	0.000161093	8.83e-05	0.000466667	0.000948958	5.9e-05	0.000137057	6.16e-05	7.31e-05	0.000194817	0.000127641	3.49e-05	0.000150981	8.29e-05	5.01e-05	0.000293619	3.95e-05	0.000177948	7.9e-05	7.27e-05	0.000178819	8.61e-05	0.000233813	0.000295722	4.53e-05	6.74e-05	4.79e-05	0.000131351	0.000367888	7.81e-05	9.55e-05	7.85e-05	8.22e-05	0.000155878	0.000163682	8.17e-05
Clostridium_sp._BNL1100	4.14e-05	2.57e-05	8.45e-05	5.05e-05	4.83e-05	7.22e-05	0.000118312	5.25e-05	8.05e-05	4.79e-05	5.08e-05	3.41e-05	3.94e-05	8.33e-05	0.000105843	0.00023415	0.000481542	5.16e-05	0.000139309	3.12e-05	2.55e-05	0.000115147	4.29e-05	3.48e-05	5.48e-05	3.83e-05	3.2e-05	6.78e-05	4.23e-05	4.63e-05	4.65e-05	0.000111267	9.36e-05	9.98e-05	9.61e-05	0.000110663	5.46e-05	7.08e-05	5.01e-05	5.29e-05	0.000130925	0.000104753	5.52e-05	9.3e-05	5.36e-05	1.64e-05	0.000144936	5.37e-05
Clostridium_sp._SY8519	0.00106085	0.000637353	0.000946117	0.000432956	0.00135354	0.000579644	0.00148459	0.000649301	0.00111299	0.00167269	0.0011993	0.00149666	0.00242847	0.00139923	0.000693828	0.00254462	0.00101585	0.000829251	0.00122156	0.000954202	0.000795289	0.000675272	0.000698163	0.000542495	0.0012156	0.000733571	0.00106093	0.000968242	0.000926974	0.00102359	0.000720485	0.00161485	0.00236747	0.00179866	0.00153328	0.00183687	0.000655608	0.000750285	0.00145698	0.000945319	0.00135036	0.00148192	0.000974229	0.00160471	0.00103625	0.000657069	0.00174798	0.00108936
[Clostridium]_stercorarium	0.000496768	0.000218052	0.000215899	0.000191821	0.000394978	0.000246491	0.000700959	0.000212768	0.000409852	0.000298001	0.000449463	0.000329574	9.41e-05	0.000664741	0.000258762	0.000566317	0.000501485	0.000354936	0.000288668	0.000280885	0.000174992	0.000287462	0.000363719	0.000243164	0.000209616	0.000178515	0.000119721	0.000267752	0.000167599	0.0003918	0.000379325	0.000181576	0.00018589	0.000268749	0.000283689	0.000584327	0.000164303	0.000273985	7.89e-05	0.000396087	0.000367888	0.000402175	0.000354633	0.00023889	0.000255124	0.000287932	0.000504571	0.000484211
[Clostridium]_sticklandii	0.00011408	4.85e-05	7.25e-05	6.48e-05	0.000171657	0.000174147	0.00017821	0.00014432	0.000502359	8.85e-05	0.000105464	6.91e-05	3.04e-05	0.000180227	0.000172303	0.000174796	0.000412364	6.3e-05	0.000106735	9.73e-05	6.03e-05	0.000141096	0.000180337	6.56e-05	0.000152222	6.26e-05	7.4e-05	0.000264956	0.000104656	0.00025826	0.000128789	7.44e-05	0.000108607	0.000100147	0.000133848	0.000220139	7.55e-05	7.39e-05	4.6e-05	9.53e-05	0.000354903	0.00012616	7.35e-05	8.37e-05	7.76e-05	2.63e-05	0.000135689	0.000112143
Clostridium_tetani	0.000125772	2.66e-05	7.16e-05	3.86e-05	6.03e-05	6.47e-05	0.000101976	0.000119854	0.000139383	0.00010237	0.000149637	5.05e-05	4.34e-05	0.000251824	0.000198456	0.000485726	0.000427529	6.32e-05	0.00016426	5.38e-05	4.86e-05	0.000164409	0.000170969	8.25e-05	7.54e-05	8.56e-05	3.8e-05	0.000320184	2.35e-05	0.000156846	8.19e-05	4.42e-05	9.34e-05	5.27e-05	0.000190825	0.00015286	3.75e-05	2.96e-05	3.6e-05	6.89e-05	0.000231553	6.01e-05	8.36e-05	7.03e-05	8.31e-05	4.34e-05	9.41e-05	4.63e-05
Clostridium_thermocellum	0.000243644	9.67e-05	0.000180765	0.000156821	0.000215544	0.00017364	0.000479187	0.000188303	0.00032979	0.000255566	0.000393694	0.000231464	8.82e-05	0.000280833	0.000139381	0.000485726	0.000338617	0.000226359	0.000346541	0.000170343	0.000106848	0.000285232	0.000231394	0.000118225	0.000174662	0.000133158	0.000146502	0.000384501	0.000178186	0.000236529	0.000169418	0.000229026	0.000243827	0.00023914	0.000280913	0.000462987	0.000140843	0.000140571	8.26e-05	0.000215625	0.000397643	0.000224886	0.000341906	0.000187699	0.00018294	0.000183672	0.000366492	0.000254936
Collimonas_fungivorans	0.000118504	6.66e-05	5.6e-05	7.83e-05	7.94e-05	7.6e-05	0.000187615	6.95e-05	0.000102463	0.000169259	0.00016841	8.64e-05	3.92e-05	0.000134553	4.18e-05	3.7e-05	4.53e-05	0.000157372	6.22e-05	9.1e-05	7.21e-05	7.3e-05	0.00010586	4.01e-05	8.52e-05	9.98e-05	7.39e-05	0.000123739	0.000111656	6.27e-05	8.25e-05	7.1e-05	6.88e-05	0.000103679	6.11e-05	0.000218445	4.78e-05	6.11e-05	4.17e-05	8.17e-05	8.93e-05	7.9e-05	6.19e-05	8.95e-05	7.62e-05	9.47e-05	0.000173244	9.6e-05
Colwellia_psychrerythraea	9.95e-05	3.83e-06	1.06e-05	5.96e-06	5.86e-05	1.81e-05	2.33e-05	5.77e-06	9e-05	3.6e-06	2.21e-05	2.5e-05	2.37e-06	2.53e-05	3.57e-05	0.000139401	3.03e-05	2.46e-05	3.86e-05	1.85e-05	3.29e-06	1.5e-05	2.53e-05	2.47e-05	6.47e-05	5.06e-05	6.25e-06	4.54e-05	1.79e-06	3.09e-05	2.36e-05	7.64e-06	5.76e-05	4.17e-06	1.33e-05	5.15e-05	6.31e-05	4.87e-06	3.26e-06	6.68e-06	0.000173124	2.64e-05	4.34e-06	3.01e-05	2.54e-05	1.05e-05	3.85e-05	3.49e-05
Comamonadaceae_bacterium_CR	0.000172858	1.64e-05	8.24e-05	0.00010009	0.000116383	7.53e-05	0.000108906	6.21e-05	8.26e-05	3.4e-05	9.94e-05	3.05e-05	2.99e-05	7.96e-05	4.15e-05	5.61e-05	3.03e-05	0.000131176	4.23e-05	8.94e-05	8.15e-05	3.45e-05	0.000148485	2.86e-05	6.19e-05	1.29e-05	2.27e-05	4.54e-05	7.97e-05	9.98e-05	5.16e-05	4.49e-05	5.49e-05	1.97e-05	3.43e-05	0.00012761	2.51e-05	2.61e-05	6.76e-06	5.23e-05	3.84e-05	5.82e-05	2.31e-05	3.39e-05	2.55e-05	4.52e-05	0.000122479	6.65e-05
Comamonas_testosteroni	6.26e-05	6.01e-05	3.83e-05	1.79e-05	6.14e-05	3.59e-05	0.000224743	3.88e-05	7.84e-05	6.83e-05	0.000129207	6.12e-05	3.66e-05	0.00025923	3.42e-05	2.56e-05	3.76e-05	5.16e-05	3.83e-05	4.31e-05	4.53e-05	6.39e-05	7.45e-05	2.05e-05	4.01e-05	8.49e-05	5.64e-05	6.78e-05	7.1e-05	2.9e-05	5.93e-05	0.000251926	7.25e-05	5.71e-05	8.08e-05	0.000166926	2.65e-05	4.53e-05	3.12e-05	0.000102291	6.92e-05	6.94e-05	3.18e-05	4.84e-05	6.47e-05	5.07e-05	9.27e-05	5.92e-05
Conexibacter_woesei	0.000229107	0.000136195	0.000130342	8.43e-05	0.000264985	0.000137594	0.000381666	0.000186653	0.000247239	0.000185322	0.000225284	0.000158119	6.29e-05	0.000272192	0.000109228	0.000173162	0.000265284	0.000323142	0.000199954	0.000143563	0.000129289	0.00016076	0.000237717	7.33e-05	0.00013154	0.000290388	0.000103952	0.000236293	0.000152153	0.000116532	0.000131347	0.000156901	0.000131979	0.000126678	0.000223549	0.000403504	8.57e-05	0.000113755	4.08e-05	0.000280719	0.000257521	0.000187058	0.000151283	0.000133206	0.000172398	0.00017509	0.000307486	0.000265152
Coprococcus_catus	0.00146629	0.00357126	0.00317353	0.00111875	0.00180268	0.00172398	0.00283453	0.00133956	0.00223635	0.00422452	0.00265316	0.0106423	0.00211691	0.00333914	0.00209902	0.00575683	0.00217795	0.00213222	0.00211407	0.00133234	0.00225473	0.00101098	0.00214929	0.000848812	0.00384175	0.0023625	0.00219788	0.00260552	0.00296495	0.00295928	0.00170906	0.00636281	0.00703827	0.00561023	0.0070394	0.00647809	0.00116025	0.00273212	0.00407642	0.00292139	0.0043638	0.00281356	0.00199387	0.0129951	0.00211392	0.00176935	0.00393064	0.00429755
Coprococcus_sp._ART55/1	0.0238537	0.00825367	0.00556545	0.00195259	0.00308483	0.00223489	0.0142726	0.00229784	0.00364801	0.00477161	0.0063223	0.00516984	0.0059391	0.00516486	0.00233009	0.00570401	0.00273843	0.00519027	0.0316593	0.00294013	0.00350479	0.00105011	0.00160664	0.0221397	0.248947	0.0014698	0.00714309	0.00159183	0.0115214	0.0112368	0.00537679	0.00444136	0.0562889	0.0192197	0.0119031	0.00525436	0.0027707	0.00280894	0.105031	0.0018578	0.0178837	0.0040945	0.00157994	0.00595079	0.00207064	0.00312972	0.0045585	0.00338021
Coprothermobacter_proteolyticus	1.3e-05	1.07e-05	1.01e-05	1.07e-05	3.06e-05	1.57e-05	5.05e-05	8.8e-06	6.22e-05	2.69e-05	5.63e-05	2.31e-05	1.64e-06	2.35e-05	1.57e-05	3.76e-05	2.56e-05	1.54e-05	1.23e-05	2.84e-05	1.32e-05	2.84e-05	2.39e-05	1.77e-05	7.65e-06	9.25e-06	5.64e-06	5.8e-05	2.3e-05	2.2e-05	2.11e-05	1.67e-05	1.96e-05	2.84e-05	3.08e-05	6.78e-05	1.23e-05	7.06e-06	7e-06	3.08e-05	3.68e-05	1.68e-05	2.66e-05	1.72e-05	2.08e-05	3.21e-05	4.35e-05	2.71e-05
Coraliomargarita_akajimensis	0.000443994	6.11e-05	0.000227285	9.47e-05	0.000310261	0.000129042	0.000561361	0.000144045	9.58e-05	0.000224879	0.000366086	0.000169073	9.13e-05	0.000430816	0.000154457	0.000382809	0.000216465	0.000540903	0.000176909	0.000347934	0.000167787	0.000216103	0.000388779	0.000101786	0.000116338	4.18e-05	8.3e-05	7.48e-05	0.00026566	0.000135744	0.000129164	7.74e-05	0.000298916	8.82e-05	0.000189911	0.000363679	0.000108101	7.3e-05	1.53e-05	0.00030571	0.000703856	0.000163988	0.000119754	9.43e-05	7.89e-05	0.000188411	0.000544768	0.000474708
Corallococcus_coralloides	0.000212043	9.69e-05	0.000115269	0.000140418	0.000157214	0.000196509	0.000314343	0.000102811	0.000127353	8.37e-05	0.00020651	0.000102873	4.58e-05	0.000275895	7.63e-05	0.000178608	8.73e-05	0.000253354	0.000149706	0.000159067	0.000100878	0.000104403	0.000251535	3.01e-05	0.000111891	0.000121882	6.87e-05	9.65e-05	0.000106449	4.66e-05	7.32e-05	9.11e-05	0.000109982	6.98e-05	0.000170825	0.000270641	8.3e-05	0.000116618	3.51e-05	0.000223761	0.000250488	0.000129694	7.72e-05	0.00010862	8.88e-05	0.000126419	0.000292137	0.00021502
Coriobacterium_glomerans	0.00030811	0.00193622	0.000268058	9.01e-05	0.000241098	0.000265686	0.000378201	0.00254552	0.00541934	0.00186089	0.000364429	0.000447211	0.00149726	0.000501796	0.000194456	0.000217814	0.000173048	0.000853846	0.000198741	0.00091071	0.000318898	0.000532757	0.000253175	7.95e-05	0.000554494	0.00185901	0.00145824	0.000815141	0.00068758	0.000349596	0.000278397	0.00251365	0.00118545	0.00107373	0.00217725	0.00224901	0.000107932	0.000448053	0.000210468	0.000568412	0.000312705	0.000310101	0.00139973	0.000241826	0.000582805	0.00138087	0.000387062	0.000360426
Corynebacterium_argentoratense	5.56e-05	6.16e-05	4.46e-05	4.93e-05	5.92e-05	3.76e-05	0.000208407	4.92e-05	0.000101633	0.000123468	0.000113194	5.57e-05	9.04e-05	0.000127146	3.08e-05	8.28e-05	2.85e-05	0.00011158	3.24e-05	4.63e-05	3.69e-05	5.25e-05	5.32e-05	3.7e-05	6.35e-05	9.63e-05	0.000109502	7.48e-05	9.93e-05	3.97e-05	3.37e-05	6.62e-05	4.45e-05	9.5e-05	6.55e-05	9.35e-05	3.67e-05	1.72e-05	2.86e-05	6.95e-05	8.44e-05	4.84e-05	5.5e-05	4.73e-05	7.62e-05	7.17e-05	8.56e-05	7.82e-05
Corynebacterium_aurimucosum	0.000201931	0.000137926	0.000110932	3.35e-05	0.000216933	0.000169902	0.000225733	0.000319153	0.000396162	0.000208577	0.000286574	0.000227177	0.000112482	0.00037465	8.68e-05	4.96e-05	4.96e-05	0.000267152	7.83e-05	0.000162893	0.000140817	0.000121431	0.00017214	4.06e-05	0.000155324	0.000155963	0.000115404	9.93e-05	0.000321603	0.000196845	0.000145876	0.000234558	0.000179605	0.00024584	0.000197293	0.00035063	4e-05	7.46e-05	3.59e-05	0.00018424	0.000102251	0.00013489	0.000170374	0.000101281	0.0002168	0.000282681	0.000221178	0.000259925
Corynebacterium_callunae	2.5e-05	5.65e-05	2.15e-05	9.93e-06	2.17e-05	1.86e-05	3.02e-05	5.25e-05	8.75e-05	6.86e-05	2.76e-05	3.57e-05	3.94e-05	5.74e-05	2.28e-05	1.69e-05	7.27e-06	5.1e-05	2.89e-05	3.72e-05	2.84e-05	2.62e-05	4.19e-05	1.1e-05	4.46e-05	5.03e-05	3.57e-05	2.03e-05	4.3e-05	3.62e-05	1.81e-05	5.28e-05	4.39e-05	4.18e-05	4.28e-05	4.95e-05	1.12e-05	8.88e-06	1.16e-05	3.75e-05	1.95e-05	1.43e-05	5.87e-05	1.69e-05	3.49e-05	3.77e-05	4.11e-05	4.89e-05
Corynebacterium_diphtheriae	0.000178546	5.55e-05	5.28e-05	3.73e-05	8.81e-05	4.64e-05	0.000192071	0.00020727	8.75e-05	0.000103809	0.000103255	0.000117637	0.000304994	0.000177758	4.77e-05	0.00011163	0.000185097	0.000137175	0.000160622	0.000120207	7.14e-05	8.55e-05	0.000151764	8.33e-05	6e-05	0.000175348	0.000288951	0.000149606	0.00025675	6.61e-05	0.000117241	0.000126819	0.000184122	0.000151579	7.26e-05	0.000161673	8e-05	5.54e-05	0.000117732	0.000169419	0.000235881	8.6e-05	9.95e-05	0.000106051	0.000120927	0.000116812	0.000191046	0.000143505
Corynebacterium_efficiens	9.01e-05	0.000146943	4.38e-05	2.18e-05	7.47e-05	7.18e-05	8.71e-05	0.000129475	0.000174229	0.000118193	9.77e-05	9.29e-05	4.98e-05	7.59e-05	8.62e-06	2.99e-05	1.06e-05	9.92e-05	3.21e-05	8.52e-05	7e-05	7.16e-05	4.03e-05	1.01e-05	8.2e-05	0.000128723	6.88e-05	7.34e-05	0.000121664	6.33e-05	4.74e-05	0.000110473	8.6e-05	0.000112462	0.00012601	0.000148793	2.21e-05	3.04e-05	2.95e-05	0.00011159	5.25e-05	5.92e-05	0.000116572	5.17e-05	7.94e-05	0.000154981	9.21e-05	0.000107154
Corynebacterium_glutamicum	4.58e-05	3.98e-05	3.22e-05	1.58e-05	4.36e-05	3.82e-05	4.26e-05	0.000123977	0.000108271	8.3e-05	0.000116507	5.26e-05	4.58e-05	9.38e-05	3.54e-05	3.43e-05	2.93e-05	5.76e-05	2.3e-05	4.51e-05	2.76e-05	6.99e-05	5.78e-05	2.45e-05	4.51e-05	4.9e-05	5.94e-05	5.59e-05	8.6e-05	4.38e-05	4.56e-05	7e-05	4.97e-05	7.35e-05	4.51e-05	0.000138964	2.21e-05	1.96e-05	1.18e-05	6.1e-05	4.44e-05	3.45e-05	3.18e-05	2.42e-05	4.89e-05	5.49e-05	4.16e-05	0.000109054
Corynebacterium_halotolerans	0.000165905	0.000286998	9.73e-05	4.88e-05	0.000153603	0.000152671	0.000230188	0.000259226	0.000331034	0.000309029	0.000272218	0.000207174	0.000105189	0.0001685	4.4e-05	5.94e-05	4.92e-05	0.000262153	5.34e-05	0.000136113	0.000150082	0.000123661	0.000121318	2.23e-05	0.000122439	0.000258714	0.000136195	0.000156597	0.000231932	0.000114642	0.000108908	0.000219214	0.000157412	0.000228817	0.000222776	0.000250474	3.56e-05	6.2e-05	2.19e-05	0.000182496	0.000104415	0.000141125	0.000271615	7.05e-05	0.000188025	0.000274099	0.000142483	0.000316472
Corynebacterium_jeikeium	8.03e-05	0.00010698	5.02e-05	2.72e-05	6.11e-05	5e-05	0.000116332	0.000107759	0.000129012	8.99e-05	0.00011209	7.41e-05	6.8e-05	7.84e-05	2.37e-05	3.49e-05	4.82e-05	8.48e-05	5.75e-05	8.13e-05	5.52e-05	5.53e-05	6.56e-05	2.42e-05	6.05e-05	8.63e-05	4.72e-05	8.74e-05	0.000107664	0.000106769	3.98e-05	7.93e-05	5.79e-05	8.25e-05	7.95e-05	0.00010202	2.08e-05	0.000129787	1.68e-05	0.000144718	7.74e-05	7.38e-05	0.000118018	4.83e-05	6.85e-05	9.75e-05	8.72e-05	0.000105728
Corynebacterium_kroppenstedtii	4.14e-05	3.87e-05	6.31e-05	2.23e-05	5.58e-05	7.61e-05	7.57e-05	0.000116005	0.000196215	0.00012179	9.88e-05	6.41e-05	3.35e-05	8.52e-05	4.89e-05	6.86e-05	6.02e-05	6.42e-05	4.57e-05	3.89e-05	4.63e-05	9.37e-05	4.99e-05	1.55e-05	6.11e-05	5.36e-05	3.37e-05	4.47e-05	6.5e-05	3.4e-05	6.73e-05	5.95e-05	5.71e-05	8.74e-05	5.87e-05	0.00015303	2.77e-05	2.04e-05	1.55e-05	5.17e-05	4.92e-05	5.11e-05	0.000123225	2.5e-05	5.61e-05	9.25e-05	7.15e-05	7.39e-05
Corynebacterium_maris	0.000157689	0.000215623	8.05e-05	3.91e-05	0.000155269	0.000155079	0.000199001	0.000348841	0.000528908	0.000273787	0.000253444	0.00021789	0.0001329	0.000177141	5.05e-05	8.71e-06	2.66e-05	0.00016877	3e-05	0.00010873	0.000148435	0.000116363	9.98e-05	1.63e-05	0.000143742	0.000210949	0.000151435	0.000167083	0.000258312	0.000184562	8.95e-05	0.000238169	0.000158689	0.000254442	0.000243619	0.000218106	3.1e-05	7.2e-05	2.08e-05	0.000210103	7.57e-05	0.000103506	0.0001993	6.29e-05	0.000166941	0.000374132	0.000116817	0.000186984
Corynebacterium_pseudotuberculosis	3.54e-05	1.83e-05	1.3e-05	8.78e-06	3.19e-05	2.13e-05	8.51e-05	2.5e-05	3.36e-05	2.25e-05	2.98e-05	2.31e-05	1.91e-05	1.98e-05	1.05e-05	1.14e-05	3.45e-05	3.28e-05	1.98e-05	2.48e-05	2.12e-05	1.07e-05	1.73e-05	9.04e-06	3.32e-05	5.09e-05	3.23e-05	3.01e-05	2.38e-05	1.23e-05	1.35e-05	2.89e-05	2.64e-05	3.01e-05	2.41e-05	4.34e-05	1.36e-05	8.11e-06	1.38e-05	1.71e-05	4.49e-05	1.73e-05	6.51e-05	1.14e-05	2.96e-05	2.47e-05	3.77e-05	2.95e-05
Corynebacterium_resistens	4.65e-05	5.57e-05	3.26e-05	5.19e-05	3.61e-05	6.92e-05	3.27e-05	5.31e-05	6.02e-05	4.91e-05	2.87e-05	1.81e-05	3.92e-05	2.41e-05	1.48e-05	3.59e-05	2.43e-05	6.34e-05	2.65e-05	1.55e-05	2.08e-05	4.34e-05	5.27e-05	9.18e-06	3.19e-05	4.69e-05	3.84e-05	1.12e-05	3.18e-05	1.01e-05	3.21e-05	2.58e-05	2.14e-05	4.67e-05	5.77e-05	7.76e-05	7.85e-06	1.99e-05	1.82e-05	3.34e-05	0.000103333	2.47e-05	5.35e-05	2.7e-05	4.6e-05	1.46e-05	4.19e-05	6.7e-05
Corynebacterium_terpenotabidum	0.000135252	0.000183379	9.11e-05	4.98e-05	0.000124993	0.000146716	0.000124747	0.000278193	0.000345138	0.000225119	0.00016841	0.000164549	9.7e-05	0.000119123	2.06e-05	1.36e-05	2.12e-05	0.00016637	4.44e-05	0.000137724	0.000129906	0.000116161	0.000108671	2.21e-05	0.00012337	0.000190044	0.000154078	0.000156597	0.00021446	0.000180467	7.34e-05	0.000184978	0.000125105	0.000216502	0.000181792	0.000261659	1.38e-05	3.87e-05	3.5e-05	0.00011624	4.33e-05	8.5e-05	0.000198433	5.16e-05	0.000161856	0.0002326	0.000144684	0.000197676
Corynebacterium_ulcerans	1.17e-05	2.08e-05	9.11e-06	7.63e-06	1.22e-05	1.21e-05	1.04e-05	1.92e-05	1.99e-05	1.85e-05	1.05e-05	8.33e-06	8.75e-06	6.17e-06	3.69e-06	4.36e-06	9.14e-06	1.8e-05	8.49e-06	3.62e-06	1.38e-05	3.24e-06	1.48e-05	1.23e-06	1.4e-05	3.83e-05	8.99e-06	1.4e-05	1.31e-05	4.72e-06	1.15e-05	1.74e-05	1.72e-05	2.52e-05	1.96e-05	5.51e-05	6.75e-06	6.97e-06	3.14e-06	7.56e-06	1.24e-05	1.45e-05	1.36e-05	8.81e-06	5.33e-06	1.95e-05	3.09e-05	2.09e-05
Corynebacterium_urealyticum	0.000111552	0.000123285	6.87e-05	2.44e-05	8.75e-05	8.37e-05	0.000107916	0.000124802	0.000165517	0.000131859	0.000131415	0.00014788	5.21e-05	0.000198126	2.65e-05	4.96e-05	7.15e-05	0.000173169	9.48e-05	0.00010873	5.09e-05	6.22e-05	6.56e-05	3.25e-05	8.32e-05	0.000146207	8.38e-05	7.2e-05	0.000116805	7.28e-05	6.27e-05	9.54e-05	8.59e-05	0.000100238	0.000118488	0.000202006	3.48e-05	7.12e-05	3.28e-05	0.000142684	7.14e-05	0.000117639	0.00012496	4.62e-05	0.000110136	0.000110792	0.00013506	0.00016774
Corynebacterium_variabile	0.000121664	0.000204609	6.63e-05	1.72e-05	8.78e-05	8.24e-05	0.000145043	0.000188303	0.000269639	0.000174773	0.000150741	0.000143831	7.91e-05	7.28e-05	2.12e-05	5.66e-05	1.27e-05	0.000135776	2.58e-05	8.56e-05	5.97e-05	9.12e-05	8.27e-05	1.37e-05	9.2e-05	0.000216397	0.000125183	7.9e-05	0.000162682	0.000112438	6.61e-05	0.000146296	9.73e-05	0.000155291	0.000173497	0.000135575	2.21e-05	5.38e-05	7.37e-06	0.000168257	3.03e-05	8.52e-05	0.00021521	6.83e-05	0.000104927	0.000200835	9.11e-05	0.000184846
Coxiella_burnetii	4.36e-05	3.69e-06	8.57e-06	1.36e-05	2.89e-05	7.22e-06	1.39e-05	0	8.3e-07	5.27e-06	4.42e-06	2.62e-06	1.11e-05	7.41e-06	8e-06	0.000129055	3.57e-05	2.08e-05	6.58e-06	1.19e-05	1.01e-05	8.11e-06	1.08e-05	3.97e-06	2.45e-05	1.39e-06	5.29e-07	2.8e-06	4.57e-06	5.35e-06	1.15e-05	3.4e-06	1.08e-06	1.36e-06	4.71e-06	8.13e-06	2.98e-05	9.26e-06	0	7.85e-06	3.68e-05	4.78e-06	2.31e-06	7.34e-06	1.12e-06	1.41e-06	8.37e-06	1.24e-05
Crinalium_epipsammum	4.14e-05	8.39e-06	1.45e-05	1.12e-05	2.75e-05	4.56e-06	9.46e-05	7.7e-06	3.32e-06	7.91e-06	3.26e-05	2.38e-06	1.88e-05	2.65e-05	3.88e-05	4.85e-05	9.97e-06	1.54e-05	4.42e-05	1.25e-05	5.97e-06	8.51e-06	1.31e-05	1.04e-05	1.23e-05	9.38e-06	5.2e-06	3.64e-05	1.33e-06	3.75e-05	1.04e-05	2.73e-06	2.24e-05	8.15e-06	4.08e-06	4.76e-05	6.92e-06	5.73e-06	7.85e-06	7.56e-06	7.03e-05	1.29e-05	2.31e-06	1.47e-05	2.23e-05	5.51e-06	3.8e-05	2.97e-05
Croceibacter_atlanticus	0.000349823	1.2e-05	6.46e-05	9.61e-05	0.0004097	0.000171613	0.000994511	0.000180606	0.00106487	0.000119392	0.000625604	2.69e-05	5.92e-05	0.00187633	4.49e-05	9.37e-05	6.09e-05	3.18e-05	4.12e-05	8.76e-05	0.000176228	0.00011312	0.000213126	0.000101238	8.92e-05	0.000119475	0.00015813	0.000164986	0.000346653	5.92e-05	0.000743417	0.000108762	0.000225267	9.48e-05	0.000184709	0.000573481	0.000117636	9.44e-05	2.6e-05	0.000201385	5.63e-05	0.000303658	6.65e-06	4.73e-05	0.000577595	7.11e-05	0.000196456	1.19e-05
Cronobacter_sakazakii	7.74e-05	2.14e-05	3.64e-05	2.65e-05	6.03e-05	3.81e-05	5.45e-05	4.89e-05	4.69e-05	2.28e-05	7.23e-05	5.19e-05	2.73e-05	5.74e-05	3.08e-05	2.78e-05	3.28e-05	4.56e-05	2.74e-05	3.95e-05	5.95e-05	2.51e-05	6.21e-05	1.34e-05	2.41e-05	2.89e-05	2.7e-05	2.66e-05	6.33e-05	3.87e-05	3.67e-05	5e-05	3.29e-05	4.55e-05	3.49e-05	9.66e-05	1.21e-05	2.58e-05	2.17e-05	5.72e-05	2.16e-06	3.47e-05	5.03e-05	3.3e-05	3.26e-05	6.38e-05	8.14e-05	6.53e-05
Cronobacter_turicensis	9.01e-05	2.52e-05	2.95e-05	2.31e-05	0.000149436	4.23e-05	0.000165834	5.47e-05	0.000153902	2.42e-05	8.39e-05	1.79e-05	1.44e-05	0.000190102	3.14e-05	0.000107818	2.87e-05	3.78e-05	5.39e-05	2.46e-05	1.5e-05	2.74e-05	6.35e-05	2.84e-05	3.23e-05	1.91e-05	1.25e-05	3.71e-05	0.000211278	2.65e-05	8.38e-05	3.32e-05	3.67e-05	3.11e-05	4.54e-05	7.42e-05	2.82e-05	1.72e-05	8.69e-06	9.53e-05	3.3e-05	5.3e-05	2.02e-05	2.42e-05	5.63e-05	5.02e-05	5.72e-05	3.73e-05
Cryptobacterium_curtum	3.79e-05	0.000169238	2.56e-05	2.11e-05	3.42e-05	1.42e-05	4.31e-05	5.72e-05	0.000109515	9.13e-05	4.42e-05	3.76e-05	4.39e-05	3.52e-05	3.82e-05	8.66e-05	0.000289382	6.58e-05	3.4e-05	4.65e-05	1.44e-05	2.53e-05	2.97e-05	1.04e-05	4.98e-05	0.000154063	9.1e-05	0.000125137	4.52e-05	1.86e-05	3.62e-05	0.000197086	0.000116071	8.79e-05	0.00011304	0.000167774	1.17e-05	3.9e-05	1.65e-05	4.56e-05	3.9e-05	2.56e-05	3.85e-05	2.15e-05	5.58e-05	5.47e-05	5.84e-05	3.99e-05
Cupriavidus_metallidurans	0.000129564	3.61e-05	7.6e-05	5.52e-05	8.17e-05	5.78e-05	8.76e-05	6.05e-05	3.07e-05	4.84e-05	0.000111537	5.24e-05	2.68e-05	8.89e-05	3.51e-05	1.8e-05	3.93e-05	0.000157772	5.98e-05	9.73e-05	7.99e-05	4.2e-05	0.000103284	1.93e-05	4.78e-05	2.31e-05	3.67e-05	4.19e-05	0.000101705	6.39e-05	3.16e-05	5.01e-05	5.82e-05	3.73e-05	5.75e-05	0.000201159	2.29e-05	1.95e-05	8.69e-06	3.34e-05	2.49e-05	3.51e-05	3.7e-05	3.85e-05	3.68e-05	7.84e-05	0.000155567	0.000142317
Cupriavidus_necator	0.000217731	9.76e-05	0.000131968	5.13e-05	0.000149714	0.000112761	0.000205932	0.000135523	0.000116567	0.000182924	0.000316943	0.000153595	0.000140374	0.000208619	8.89e-05	2.94e-05	5.98e-05	0.000235758	7.42e-05	0.000173162	0.000144317	0.000111295	0.000170501	5.3e-05	7.48e-05	0.000153176	0.00020024	0.000151004	0.000271734	9.07e-05	7.4e-05	0.000157798	0.000162518	0.000167153	0.000113391	0.000331649	5.05e-05	9.27e-05	6.15e-05	0.000144137	0.000119564	9.39e-05	9.57e-05	7.58e-05	0.00013457	0.000208008	0.000253953	0.000217396
Cupriavidus_pinatubonensis	5.34e-05	4.61e-05	3.46e-05	1.18e-05	4.17e-05	3.63e-05	0.000106431	9.48e-05	0.000137309	5.85e-05	6.85e-05	4.69e-05	2.35e-05	0.000140108	5.23e-06	2.01e-05	3.99e-05	5.54e-05	2.51e-05	2.5e-05	3.58e-05	2.49e-05	4.1e-05	1.14e-05	4.22e-05	7.7e-05	3e-05	3.36e-05	5.88e-05	2.27e-05	5.75e-05	5.32e-05	4.09e-05	6e-05	6.19e-05	6.9e-05	1.4e-05	1.71e-05	2.2e-05	4.3e-05	4.38e-05	3.85e-05	3.99e-05	2.97e-05	6.72e-05	6.53e-05	5.46e-05	4.42e-05
Cupriavidus_taiwanensis	0.000100807	3.49e-05	5.21e-05	2.01e-05	0.000103605	4.87e-05	5e-05	5.58e-05	2.9e-05	3.57e-05	6.63e-05	3.69e-05	1.9e-05	0.000108013	5.35e-05	1.96e-05	2.76e-05	0.000114379	2.88e-05	7.05e-05	6.16e-05	3.24e-05	0.000120615	1.85e-05	2.48e-05	2.37e-05	2.4e-05	1.96e-05	9.16e-05	5.2e-05	2.58e-05	4.39e-05	5.53e-05	3.62e-05	4.08e-05	0.000165232	9.54e-06	2.59e-05	5.55e-06	4.01e-05	4.38e-05	2.85e-05	3.21e-05	2.99e-05	3.2e-05	8.93e-05	0.000139841	0.000102639
Cyanobacterium_aponinum	4.42e-05	2.2e-06	2.08e-05	2.76e-05	1.64e-05	8.61e-05	1.09e-05	2.91e-05	0.000124864	3.48e-05	4.69e-05	1.79e-05	1.37e-05	0.00011974	4.65e-05	9.15e-05	5.69e-05	8.4e-06	0.000138963	1.83e-05	1.44e-05	1.38e-05	8.29e-05	1.69e-05	3.03e-05	3.26e-05	3.37e-05	8.18e-05	2.3e-05	4.44e-05	1.8e-05	1.46e-05	1.51e-05	4.97e-05	1.51e-05	5.51e-05	1.92e-05	1.37e-05	1.88e-05	4.82e-05	0.000300802	4.88e-05	1.04e-05	1.94e-05	2.32e-05	7.17e-06	7.55e-05	2.42e-05
Cyanobacterium_stanieri	9.8e-06	3.69e-06	1.11e-05	2.51e-06	2.92e-05	5.89e-06	3.66e-05	1.37e-05	2.82e-05	1.27e-05	7.73e-06	4.05e-06	1.82e-06	5.55e-06	1.2e-05	4.9e-06	8.31e-06	5.8e-06	3.99e-06	1.41e-06	1.03e-05	0	8.2e-06	7.67e-06	7.45e-06	8.36e-06	4.4e-06	4.47e-05	1.02e-05	4.03e-05	1.01e-05	5.16e-06	2.17e-05	1.35e-05	1.27e-05	1.64e-05	2.87e-06	1.91e-06	9.66e-07	4.94e-06	5.95e-06	6.65e-06	8.68e-06	1.01e-05	2.32e-05	5.38e-06	1.83e-05	6.89e-06
cyanobacterium_UCYN-A	8.22e-06	6.99e-07	1.08e-06	1.25e-06	1.31e-05	3.8e-06	9.9e-06	1.84e-05	2.12e-05	9.59e-06	4.42e-06	0	0	1.42e-05	5.23e-06	4.79e-05	1.27e-05	2e-06	8.84e-06	2.82e-06	0	2.84e-06	5.39e-06	3.97e-06	5.27e-06	3.04e-06	5.73e-06	0	9.26e-07	2.27e-05	7.42e-06	1.15e-06	2.26e-05	9.05e-07	3.53e-05	3.07e-05	0	2.48e-06	0	1.74e-06	1.19e-05	7.07e-06	5.21e-06	2.75e-06	1.49e-06	2.06e-05	1.15e-05	4.75e-06
Cyanobium_gracile	0.000150421	0.000137859	6.14e-05	4.81e-05	0.00014027	8.51e-05	0.000459386	4.84e-05	0.00013399	0.0001	0.000228044	7.07e-05	3.25e-05	0.000296881	4.89e-05	0.000199845	0.000124436	0.000250955	0.000153691	0.000142758	2.88e-05	0.000105822	0.000168627	2.45e-05	0.000103515	0.000111239	5.4e-05	0.00016918	9.36e-05	8.72e-05	7.58e-05	7.57e-05	0.000130211	8.51e-05	0.000189314	0.000304873	0.000123206	0.000276943	5.92e-05	0.000204291	0.000213158	0.00013676	0.000107605	5.25e-05	0.000103315	7.88e-05	0.000275718	0.000127824
Cyanothece_sp._ATCC_51142	1.11e-05	5.32e-06	1.65e-05	1.17e-05	1.17e-05	9.76e-06	0.000161874	9.9e-06	2.57e-05	1.08e-05	5.47e-05	1.43e-05	8.93e-06	4.2e-05	4.52e-05	1.47e-05	1.91e-05	1.06e-05	1.85e-05	1.49e-05	1.59e-05	1.28e-05	1.94e-05	1.25e-05	8.89e-06	3.29e-06	1.77e-05	5.59e-06	3e-05	3.72e-05	1.76e-05	1.18e-05	2.22e-05	2.49e-05	1.82e-05	1.71e-05	6.92e-06	7.73e-06	4.23e-06	2.06e-05	8.17e-05	2.35e-05	6.94e-06	6.42e-06	4.22e-06	1.09e-05	3.75e-05	1.88e-05
Cyanothece_sp._PCC_7424	6e-06	1.27e-05	9.43e-06	8.36e-07	1.44e-05	1.84e-06	1.98e-06	1.1e-06	1.08e-05	8.87e-06	1.16e-05	1.43e-06	1.82e-06	2.96e-05	1.91e-05	1.47e-05	3.03e-05	6e-06	1.65e-05	1.61e-06	0	0	3.28e-06	5.48e-06	1.39e-05	3.24e-05	9.43e-06	4.19e-06	2.66e-06	1.26e-06	4.08e-06	5.55e-06	8.84e-06	8.87e-06	2.67e-06	5.74e-05	1.69e-07	1.05e-06	0	0	1.46e-05	6.44e-06	4.05e-06	1.1e-06	5.33e-06	6.02e-06	1.06e-05	3.33e-06
Cyanothece_sp._PCC_7425	3.73e-05	9.48e-06	3.57e-05	1.78e-05	2.92e-05	1.23e-05	2.57e-05	1.07e-05	3.24e-05	6.71e-06	1.1e-05	1.31e-05	2.55e-06	1.23e-05	4.98e-05	2.5e-05	2.95e-05	2.68e-05	3.05e-05	1.19e-05	1.15e-05	2.57e-05	2.9e-05	1.47e-05	1.76e-05	2.79e-06	6.52e-06	3.71e-05	9.26e-06	3.28e-05	1.39e-05	8.41e-06	3.31e-05	1.44e-05	9.38e-06	3.07e-05	9.62e-06	1.72e-06	6.28e-06	2.32e-05	5.79e-05	2.45e-05	1.53e-05	1.34e-05	1.82e-05	8.07e-06	3.74e-05	3.21e-05
Cyanothece_sp._PCC_7822	8.25e-05	3.36e-06	1.29e-05	5.85e-06	1.11e-05	1.51e-05	1.83e-05	1.46e-05	4.48e-05	1.03e-05	1.33e-05	1.33e-05	8.02e-06	4.94e-05	2.46e-06	4.36e-05	4.57e-06	3.4e-06	2.95e-06	2.82e-06	7.21e-06	5.68e-06	1.45e-05	4.93e-06	4.96e-06	1.13e-05	2.82e-06	1.4e-06	1.06e-05	1.98e-05	1.02e-05	7.83e-06	1.82e-05	1.55e-05	7.17e-06	1.05e-05	2.62e-06	3.63e-06	5.68e-06	1.45e-05	1.95e-05	1.64e-05	6.65e-06	5.69e-06	2.03e-05	9.22e-06	2.57e-05	4.04e-06
Cyanothece_sp._PCC_8801	0	0	4.34e-07	0	0	0	0	0	0	9.59e-07	0	0	0	0	4.31e-06	9.8e-06	0	0	6.93e-07	0	0	0	1.87e-06	2.74e-06	8.27e-07	0	0	6.99e-06	0	4.72e-06	0	0	1.27e-05	0	1.44e-06	7.97e-06	0	0	0	0	0	0	0	0	9.92e-06	0	2.52e-06	0
Cyanothece_sp._PCC_8802	3.48e-06	3.66e-07	6.51e-07	0	4.44e-06	4.43e-07	2.48e-06	5.5e-07	9.13e-06	1.92e-06	0	0	1.28e-06	3.7e-06	4.92e-06	1.09e-06	1.66e-06	1.6e-06	1.91e-06	1.01e-06	0	8.11e-07	3.51e-06	0	0	3.8e-07	4.4e-07	0	1.33e-06	2.52e-06	1.1e-06	1.32e-06	1.28e-06	0	7.03e-07	8.47e-07	5.06e-07	3.82e-07	2.42e-07	0	1.08e-06	0	0	1.83e-06	8.68e-07	8.97e-07	2.26e-06	1.66e-06
Cyclobacterium_marinum	2.18e-05	4.99e-06	6.72e-06	4.28e-06	1.17e-05	1.29e-05	5.74e-05	1.04e-05	1.16e-05	1.32e-05	2.82e-05	1.36e-05	6.75e-06	1.36e-05	3.69e-06	6.32e-05	4.07e-05	1.34e-05	1.11e-05	8.66e-06	1.07e-05	8.11e-06	1.73e-05	8.63e-06	1.26e-05	1.61e-05	1.23e-05	1.47e-05	6.02e-06	1.1e-05	9.2e-06	1.08e-05	1.66e-05	1.14e-05	1.09e-05	3.58e-05	5.65e-06	6.87e-06	7.49e-06	9.59e-06	3.57e-05	1.06e-05	2.34e-05	2.05e-05	2.72e-05	8.2e-06	1.93e-05	2.92e-05
Cycloclasticus_sp._P1	0	1.13e-06	0	0	0	0	0	0	0	4.79e-07	0	0	0	0	0	0	0	0	0	0	0	0	0	0	0	0	0	0	0	0	2.35e-07	4.18e-08	3.93e-07	0	9.84e-07	0	0	0	0	0	8.66e-06	0	4.92e-06	2.94e-06	0	5.12e-07	0	0
Cycloclasticus_zancles	0	4.66e-07	1.3e-06	0	4.17e-06	0	0	1.65e-06	0	0	0	0	0	1.23e-05	0	0	0	0	0	0	0	0	0	0	1.34e-06	0	0	0	0	0	1.67e-05	0	0	0	0	5.08e-07	0	0	0	0	0	0	0	0	0	0	0	4.75e-07
Cylindrospermum_stagnale	2.18e-05	9.52e-06	8.35e-06	3.13e-06	1.69e-05	8.24e-06	1.93e-05	1.1e-05	2.78e-05	9.59e-06	3.87e-06	4.52e-06	6.91e-05	2.9e-05	3.69e-06	5.83e-05	0.000113634	2.58e-05	1e-05	2.05e-05	1.11e-05	3.65e-06	1.01e-05	1.52e-05	1.29e-05	3.29e-06	7.31e-05	9.72e-05	3.17e-05	1.48e-05	1.65e-05	7.81e-06	5.01e-06	1.74e-05	7.24e-06	3.64e-05	3.88e-06	1.34e-05	1.39e-05	4.36e-06	5.46e-05	7.07e-06	1.5e-05	5.5e-06	8.93e-06	3.46e-06	3.41e-05	1.57e-05
Cytophaga_hutchinsonii	0.000110604	2.81e-05	0.000130884	4.24e-05	0.000110827	0.000132653	0.000645516	9.35e-05	0.000269639	0.000127543	0.000290439	8.31e-05	9.28e-05	0.000298732	0.000135381	0.000183509	0.000164738	0.000138775	0.000148319	6.75e-05	0.00012373	0.000141501	0.000128578	6.23e-05	7.44e-05	2.42e-05	4.82e-05	5.17e-05	8.26e-05	5.13e-05	0.000212043	5.24e-05	4.68e-05	0.000125048	0.000117926	0.000360459	7.11e-05	2.6e-05	3.56e-05	0.000107231	0.000114153	0.000112443	0.00012901	4.68e-05	8.31e-05	6.03e-05	0.000132606	0.000114519
Dactylococcopsis_salina	2.72e-05	2.99e-06	5.47e-05	2.52e-05	7.89e-05	2.47e-05	3.91e-05	5.39e-05	0.000175058	5.99e-06	6.18e-05	6.19e-06	2.19e-06	9.32e-05	2.31e-05	4.85e-05	3.39e-05	7.4e-06	4.38e-05	2.42e-06	1.59e-05	5.47e-06	4.43e-05	3.04e-05	1.59e-05	6.84e-06	2.29e-06	1.12e-05	6.51e-05	2.68e-05	0.000105294	6.16e-06	6.97e-06	5.33e-05	5.94e-06	3.19e-05	2.26e-05	2.34e-05	1.45e-06	8.6e-05	5.14e-05	6.4e-05	2.6e-06	4.99e-05	2.29e-05	8.97e-07	0.00014588	1.21e-05
Dechloromonas_aromatica	9.73e-05	5.49e-05	6.89e-05	2.47e-05	0.000124438	8.5e-05	0.000113856	0.000128101	0.000199533	0.00010237	0.000181662	0.00011597	5.6e-05	0.000214174	3.72e-05	6.32e-05	3.41e-05	0.000147773	8.52e-05	8.4e-05	9.12e-05	7.3e-05	0.000122723	2.25e-05	9.02e-05	8.51e-05	5.56e-05	8.39e-05	0.000120102	0.000134484	9.53e-05	9.6e-05	9.65e-05	7.6e-05	8.95e-05	0.000219631	3.2e-05	6.39e-05	1.36e-05	0.000125248	0.000134712	8.75e-05	5.12e-05	6.13e-05	6.67e-05	9.85e-05	0.00020174	9.88e-05
Deferribacter_desulfuricans	3.67e-05	7.69e-06	2.06e-05	7.63e-06	2.39e-05	5.19e-06	4.75e-05	8.25e-06	2.16e-05	2.25e-05	1.1e-05	1.48e-05	2.46e-05	1.23e-05	3.48e-05	8.39e-05	3.51e-05	1.72e-05	5.16e-05	2.42e-05	5.97e-06	2.29e-05	1.69e-05	1.59e-05	2.75e-05	6.21e-06	8.02e-06	1.05e-05	1.87e-05	2.39e-05	1.78e-05	1.5e-05	3.8e-05	9.24e-06	3.12e-05	3.69e-05	2.32e-05	6.2e-06	8.45e-06	2.03e-05	4.49e-05	1.66e-05	2.02e-05	1.23e-05	5.46e-06	2.1e-05	5.4e-05	2.33e-05
Dehalobacter_sp._CF	1.9e-06	2.89e-06	1.84e-06	2.51e-06	5.56e-06	2.91e-06	1.98e-06	2.47e-06	2.49e-06	3.12e-06	8.28e-06	2.38e-06	1.46e-06	9.88e-06	1.23e-06	1.63e-06	4.15e-07	1.8e-06	1.21e-06	1.81e-06	8.23e-07	2.84e-06	3.28e-06	8.22e-07	3.62e-06	3.93e-06	3.08e-06	6.29e-06	3.18e-06	0	2.39e-06	2.32e-06	6.38e-06	5.52e-06	4.29e-06	9.66e-06	1.01e-06	5.34e-06	4.95e-06	4.36e-06	1.08e-06	1.16e-05	4.05e-06	3.3e-06	4.22e-06	7.3e-06	5.41e-06	4.04e-06
Dehalobacter_sp._DCA	0	1.33e-07	4.55e-06	0	0	4.43e-07	6.19e-05	0	0	4.79e-07	0	0	0	0	0	0	2.49e-06	3.6e-06	0	1.61e-06	0	0	0	0	2.07e-07	0	0	0	0	0	5.87e-07	4.18e-07	0	1.81e-07	1.72e-06	3.39e-07	1.69e-06	1.15e-06	0	5.52e-06	3.25e-06	8.31e-07	8.68e-07	0	0	0	2.2e-06	0
Dehalococcoides_mccartyi	6e-05	5.31e-05	6.31e-05	2.5e-05	7.25e-05	5.04e-05	0.000102471	4.29e-05	7.76e-05	5.2e-05	0.000115955	8.41e-05	5.65e-05	0.000114185	5.48e-05	9.53e-05	0.000100754	4.72e-05	5.18e-05	4.81e-05	5.6e-05	5.51e-05	7.24e-05	2.71e-05	3.82e-05	9.35e-05	3.37e-05	7.06e-05	5.21e-05	1.86e-05	6.04e-05	4.35e-05	8.93e-05	7.38e-05	9.22e-05	0.00015625	6.29e-05	6.43e-05	1.86e-05	0.000374292	0.000147155	0.000106623	7.03e-05	0.00016293	7.68e-05	4.28e-05	0.000172426	4.87e-05
Dehalogenimonas_lykanthroporepellens	3.35e-05	1.71e-05	1.58e-05	2.9e-05	3.33e-05	1.71e-05	8.02e-05	4.26e-05	4.31e-05	3.36e-05	5.58e-05	2.91e-05	5.47e-06	7.53e-05	2.77e-05	5.55e-05	0.000195484	3.38e-05	4.49e-05	4.83e-05	2.04e-05	3.16e-05	2.93e-05	4.22e-05	3.99e-05	3.9e-05	4e-05	8.18e-05	4.67e-05	4.6e-05	1.93e-05	1.96e-05	3e-05	2.27e-05	3.49e-05	7.88e-05	1.91e-05	6.49e-05	2.15e-05	4.36e-05	5.68e-05	5.18e-05	3.44e-05	2.72e-05	5.09e-05	3.05e-05	6.57e-05	5.25e-05
Deinococcus_deserti	5.72e-05	6.78e-05	6.25e-05	2.32e-05	7.58e-05	5.56e-05	0.000168804	5.2e-05	0.000101218	9.47e-05	0.000103255	0.00010573	3.83e-05	0.00018393	2.18e-05	8.71e-05	4.49e-05	8.3e-05	6.36e-05	7.23e-05	4.04e-05	6.26e-05	8.36e-05	1.75e-05	5.22e-05	5.35e-05	6.84e-05	7.2e-05	8.87e-05	4.98e-05	4.96e-05	4.08e-05	5.74e-05	4.23e-05	7.83e-05	0.000203362	3.99e-05	8.44e-05	4.83e-05	0.000125248	0.000111989	8.83e-05	6.02e-05	5.23e-05	8.38e-05	6.98e-05	0.000142294	0.00011048
Deinococcus_geothermalis	8.09e-05	3.4e-05	0.000125245	4.04e-05	8.36e-05	7.63e-05	0.000142073	9.57e-05	0.000158465	8.75e-05	0.000154054	9.26e-05	2.95e-05	0.000196892	4.18e-05	4.3e-05	5.67e-05	0.000102781	3.76e-05	7.75e-05	5.37e-05	0.000133798	9.58e-05	2.47e-05	9.94e-05	4.41e-05	4.19e-05	6.29e-05	9.58e-05	3.5e-05	9.58e-05	5.06e-05	7.79e-05	8.94e-05	6.57e-05	0.000248949	4.61e-05	6.39e-05	4e-05	0.000109265	9.25e-05	8.4e-05	5.44e-05	4.42e-05	7.16e-05	6.63e-05	0.000165821	0.000118321
Deinococcus_gobiensis	0.000127984	6.12e-05	6.77e-05	4.43e-05	0.000106661	6.28e-05	0.000125242	8.05e-05	0.000192481	8.68e-05	0.000197123	5.91e-05	2.15e-05	0.000212939	4.06e-05	0.000109996	8.21e-05	0.000115579	7.73e-05	4.61e-05	6.84e-05	6e-05	0.000117805	2.58e-05	5.21e-05	8.5e-05	5.37e-05	7.55e-05	6.07e-05	2.49e-05	5.51e-05	6.61e-05	4.69e-05	4.82e-05	0.000110896	0.000183534	5.01e-05	8.82e-05	2.77e-05	9.71e-05	0.000177993	0.000113274	5.93e-05	2.86e-05	5.07e-05	8.44e-05	0.000197714	0.000100264
Deinococcus_maricopensis	0.000110288	6.37e-05	9.68e-05	3.93e-05	0.000138326	7.75e-05	0.000150488	0.000102536	7.92e-05	7.05e-05	7.73e-05	8.83e-05	1.51e-05	0.000217877	4.06e-05	0.000119798	8.25e-05	0.000226159	0.000113319	0.000134301	4.78e-05	7.12e-05	0.000192282	2.67e-05	6.31e-05	5.12e-05	5.25e-05	9.02e-05	0.000123458	5.89e-05	4.87e-05	5.92e-05	8.03e-05	4.12e-05	9.01e-05	0.000227257	4.99e-05	7.14e-05	2.09e-05	0.000145009	0.000120105	9.23e-05	8.24e-05	5.91e-05	5.71e-05	0.000132951	0.000209729	0.000176055
Deinococcus_peraridilitoris	6.07e-05	5.36e-05	5.22e-05	8.06e-05	7.11e-05	0.000118336	0.000120787	0.000159714	0.000171325	0.000111481	0.000167858	7.33e-05	5.36e-05	0.000208619	1.78e-05	2.89e-05	6.88e-05	4.72e-05	2.36e-05	5.74e-05	7.16e-05	6.55e-05	0.000114057	3.45e-05	6.22e-05	9.12e-05	7.7e-05	9.58e-05	0.000111193	6.55e-05	6.76e-05	9.5e-05	7.4e-05	0.000104765	0.000121054	0.000151505	3.47e-05	3.74e-05	1.98e-05	8.43e-05	4e-05	9.12e-05	6.62e-05	3.61e-05	8.86e-05	0.000110664	0.00010455	6.2e-05
Deinococcus_proteolyticus	9.42e-05	7.13e-05	8.06e-05	2.1e-05	7.64e-05	7.4e-05	0.000244049	0.000154491	0.000107856	6.83e-05	0.000106016	0.000119304	4.45e-05	0.000136405	4.4e-05	7.84e-05	3.99e-05	0.000132776	6.06e-05	9.79e-05	4.74e-05	8.41e-05	0.00012811	4.53e-05	7.23e-05	8.35e-05	6.66e-05	9.51e-05	0.000131268	9.29e-05	5.03e-05	0.0001	0.000100948	8.73e-05	9.61e-05	0.000154555	3.3e-05	5.99e-05	3.27e-05	7.32e-05	6.65e-05	5.84e-05	7.87e-05	3.56e-05	0.000101454	0.000121167	0.000151227	0.000127587
Deinococcus_radiodurans	0.000114396	7.12e-05	5.05e-05	6.71e-05	0.000297484	7.54e-05	0.000430179	0.000354339	0.000158465	8.37e-05	0.000585848	5.72e-05	3.12e-05	0.000587589	4.43e-05	0.000204746	4.42e-05	9.02e-05	7.05e-05	4.71e-05	6.57e-05	6.89e-05	0.000102581	2.07e-05	6.28e-05	9.06e-05	6.73e-05	0.000271248	0.000124788	4.85e-05	5.49e-05	6.66e-05	0.000106251	6.08e-05	0.000137785	0.000129135	3.89e-05	5.03e-05	2.35e-05	9.85e-05	8.66e-05	5.36e-05	8.74e-05	0.000129536	6.88e-05	6.57e-05	0.000142042	9.65e-05
Delftia_acidovorans	1.01e-05	2.03e-05	3.04e-06	1.58e-05	1.14e-05	1.84e-05	2.97e-06	1.51e-05	3.32e-06	1.46e-05	1.21e-05	6.67e-06	2.13e-05	1.85e-05	0	8.71e-06	4.15e-06	1.82e-05	1.18e-05	1.03e-05	4.74e-06	4.05e-06	1.66e-05	6.16e-06	8.69e-06	1.1e-05	1.82e-05	1.26e-05	1.35e-05	1.45e-05	6.31e-06	1.18e-05	3.83e-06	8.51e-06	1.29e-05	1.1e-05	3.29e-06	2.3e-05	1.46e-05	1.42e-05	4.33e-06	8.52e-06	6.65e-06	1.05e-05	1.4e-05	1.54e-06	9.56e-06	1.57e-05
Delftia_sp._Cs1-4	1.36e-05	5.86e-06	9.76e-06	3.66e-06	3.44e-05	7.6e-06	1.14e-05	1.57e-05	1.7e-05	5.75e-06	2.1e-05	7.14e-06	2.92e-06	2.16e-05	1.85e-06	1.03e-05	6.86e-06	5.2e-06	1.49e-05	8.05e-06	2.47e-06	1.3e-05	1.8e-05	8.22e-07	5.07e-06	1.56e-05	9.87e-06	4.19e-06	7.06e-06	2.2e-06	5.8e-06	1.89e-05	7.17e-06	7.61e-06	1.61e-05	2.86e-05	9.03e-06	1.12e-05	9.66e-06	2.27e-05	1.68e-05	1.45e-05	8.39e-06	1.19e-05	1.3e-05	1.99e-05	1.38e-05	8.79e-06
Denitrovibrio_acetiphilus	0.000160849	1.34e-05	7.31e-05	3.82e-05	5.56e-05	9.96e-05	0.000593538	0.000106659	0.000103707	4.56e-05	0.000454432	1.36e-05	1.33e-05	7.9e-05	4.18e-05	7.41e-05	7.6e-05	3.26e-05	7.66e-05	4.45e-05	6.73e-05	5.01e-05	3.19e-05	3.42e-05	2.2e-05	2.39e-05	1.47e-05	3.01e-05	1.7e-05	2.49e-05	8e-05	1.78e-05	3.66e-05	4.06e-05	4.43e-05	0.000758201	2.57e-05	2.3e-05	9.18e-06	2.59e-05	2.92e-05	4.84e-05	5.18e-05	9.21e-05	3.2e-05	8.58e-06	0.000203753	2.07e-05
Desulfarculus_baarsii	7.87e-05	9.75e-05	9.15e-05	6.87e-05	0.00016138	0.000125051	0.000221277	7.97e-05	0.000112004	0.000116036	0.000137489	9.86e-05	5.25e-05	0.000279599	6.43e-05	0.000216181	0.000132746	0.000106981	0.000118344	0.000109535	8.75e-05	0.000139068	0.000209613	6.23e-05	0.00010579	0.000135312	6.53e-05	0.000134226	9.22e-05	6.08e-05	0.000113673	0.000126193	0.000115776	8.65e-05	0.000192829	0.000308093	7.73e-05	0.000162043	5.88e-05	0.000211847	0.000210453	0.000145905	9.89e-05	9.91e-05	0.000118942	0.000109127	0.000238226	0.00021502
Desulfatibacillum_alkenivorans	0.000196242	8.34e-05	0.000213513	0.000175105	0.00022721	0.000192328	0.00026385	0.000146519	0.00015805	0.000126824	0.000191601	0.00010073	6.4e-05	0.000347492	9.69e-05	0.000175885	0.000146041	0.00021956	0.00021035	0.000138731	0.000150288	0.000170896	0.000305871	7.3e-05	8.69e-05	7.55e-05	9.42e-05	0.000141217	0.000210526	0.000140783	0.000136816	0.000119888	0.000131488	0.000177657	0.000127732	0.000426213	0.000152235	0.00010278	3.22e-05	0.000259796	0.000225061	0.000241513	8.53e-05	0.000148068	9.49e-05	0.000111433	0.000527469	0.000277269
Desulfitobacterium_dehalogenans	6.7e-05	2.65e-05	2.6e-05	3.35e-05	3.25e-05	2.83e-05	0.000115836	3.35e-05	8.38e-05	3.84e-05	2.98e-05	6.36e-05	2.1e-05	4.94e-05	3.17e-05	7.02e-05	6.77e-05	1.98e-05	0.000105002	2.56e-05	2.86e-05	3.65e-05	5.43e-05	2.48e-05	5.7e-05	1.66e-05	2.92e-05	2.17e-05	1.72e-05	2.33e-05	2.54e-05	3.42e-05	5.52e-05	4.55e-05	5.18e-05	8.03e-05	3.52e-05	4.2e-05	9.37e-05	3.72e-05	0.000120105	3.78e-05	2.98e-05	3.1e-05	5.27e-05	3.75e-05	7.49e-05	5.23e-05
Desulfitobacterium_dichloroeliminans	8.82e-05	8.13e-05	6e-05	3.86e-05	9.97e-05	6.76e-05	0.000123757	7.28e-05	0.000111174	8.2e-05	0.000141354	0.000107397	2.57e-05	0.000185782	6.74e-05	0.000263011	9.7e-05	0.000122778	9.62e-05	6.93e-05	5.72e-05	9.69e-05	9.7e-05	2.32e-05	5.49e-05	9.29e-05	2.86e-05	0.00010766	5.55e-05	4.5e-05	7.62e-05	7.37e-05	7.78e-05	8.62e-05	0.000102741	0.00020726	7.48e-05	3.86e-05	4.56e-05	0.000163607	0.000120646	0.000107662	0.000107026	8e-05	6.65e-05	9.13e-05	0.000150975	0.00010359
Desulfitobacterium_hafniense	0.000132724	8.01e-05	9.61e-05	6.34e-05	0.000154714	6.11e-05	0.000447505	0.000105559	0.000141042	9.81e-05	0.000262279	6.29e-05	6.93e-05	0.000247503	8.37e-05	0.000166628	0.000107402	0.00011138	0.000107601	0.000103897	0.000106025	8.27e-05	0.000165582	4.01e-05	7e-05	0.000217791	8.11e-05	0.00019225	0.000106449	0.000125981	0.000108134	0.000116006	9.64e-05	0.000215144	0.000144112	0.000397573	6.57e-05	0.000123298	4.25e-05	0.000194411	0.000214782	0.000116807	0.000123803	9.89e-05	8.17e-05	0.000112714	0.00027685	9.96e-05
Desulfobacca_acetoxidans	9.67e-05	1.99e-05	2.24e-05	2.97e-05	4.22e-05	2.21e-05	0.000108906	1.46e-05	4.15e-06	3.16e-05	8.83e-06	1.5e-05	7.29e-06	5.37e-05	3.82e-05	1.91e-05	3.05e-05	3.5e-05	8.78e-05	2.82e-05	3.56e-05	3.1e-05	5.08e-05	1.71e-05	7.76e-06	1.41e-05	5.2e-06	5.03e-05	9.72e-06	2.43e-05	4.48e-05	1.43e-05	1.74e-05	1.15e-05	2.07e-05	3.41e-05	2.97e-05	3.37e-05	1.32e-05	1.66e-05	1.57e-05	4.07e-05	1.07e-05	1.5e-05	1.1e-05	9.09e-06	2.67e-05	3.99e-05
Desulfobacterium_autotrophicum	0.000587779	6.55e-05	0.000295601	0.000121612	0.00042831	0.000232301	0.000222267	0.000241907	0.000132331	8.2e-05	0.000271113	0.000313619	0.000103549	0.000419706	0.000225225	0.000131233	0.000245341	0.000656882	0.000131339	0.000331021	0.000411953	0.000159746	0.000527428	0.000204394	4.36e-05	2.36e-05	0.000128531	9.58e-05	0.000444945	0.000167554	8.96e-05	0.000156942	0.000206806	0.000143248	7.95e-05	0.000692786	6.91e-05	0.00010173	1.61e-05	0.000136872	0.000174747	0.000175419	0.000103555	0.000107702	0.000123779	0.000255271	0.000585343	0.000380859
Desulfobacula_toluolica	1.07e-05	6.29e-06	1.14e-05	5.61e-05	1.28e-05	5.94e-05	1.49e-05	4.92e-05	1.7e-05	3.36e-06	1.1e-06	8.81e-06	6.2e-06	2.1e-05	5.23e-06	3.1e-05	1.54e-05	9.2e-06	9.01e-06	7.25e-06	3.71e-06	1.34e-05	3.51e-05	6.99e-06	9.93e-06	1.32e-05	8.72e-06	0	1.04e-05	9.76e-06	1.12e-05	1.49e-05	2.34e-05	1.05e-05	3.68e-05	3.42e-05	5.91e-06	9.26e-06	9.9e-06	5.81e-06	1.95e-05	1.7e-05	1.45e-05	1.43e-05	1.96e-05	1.23e-05	1.4e-05	1.14e-05
Desulfobulbus_propionicus	0.000127036	5.69e-05	4.68e-05	3.24e-05	7.06e-05	6.85e-05	0.000142073	4.29e-05	7.47e-05	7.34e-05	0.000165098	6.95e-05	3.52e-05	0.000208619	2.92e-05	8.28e-05	3.32e-05	0.000171969	8.09e-05	8.38e-05	4.26e-05	8.8e-05	7.94e-05	4.01e-05	4.2e-05	2.85e-05	3.26e-05	1.82e-05	8.24e-05	4.38e-05	8.18e-05	7.12e-05	5.6e-05	6.61e-05	6.39e-05	0.000170824	6.66e-05	6.2e-05	3.05e-05	0.000112171	0.000110907	0.000123874	5.18e-05	5.38e-05	5.92e-05	6.24e-05	0.000157077	0.000110718
Desulfocapsa_sulfexigens	4.11e-05	1.36e-05	2.22e-05	4.98e-05	3.83e-05	3.11e-05	6.53e-05	5.47e-05	9e-05	1.2e-05	2.37e-05	5.95e-06	2.21e-05	2.65e-05	2.03e-05	1.63e-05	9.56e-05	4.78e-05	1.78e-05	1.91e-05	4.61e-05	1.16e-05	4.33e-05	3.56e-05	3.88e-05	2.43e-05	1.93e-05	2.52e-05	6.58e-05	2.02e-05	2.5e-05	2.92e-05	3.95e-05	2.4e-05	4.28e-05	2.44e-05	1.75e-05	7.63e-06	3.02e-06	3.89e-05	9.58e-05	3.41e-05	1.27e-05	1.93e-05	2.01e-05	2.1e-05	4.08e-05	1.85e-05
Desulfococcus_oleovorans	0.000127352	8.67e-05	7.93e-05	6.87e-05	0.00011416	8.46e-05	0.000497008	9.92e-05	8.75e-05	4.89e-05	0.000146324	6.88e-05	3.79e-05	0.000199361	5.72e-05	8.11e-05	7.42e-05	0.000155372	7.64e-05	0.000112555	6.75e-05	7.38e-05	9.7e-05	4.08e-05	3e-05	4.28e-05	3.47e-05	5.24e-05	0.000111309	6.02e-05	0.000103416	6.69e-05	5.27e-05	5.74e-05	7.89e-05	0.000296908	5.43e-05	0.000105452	4.71e-05	9.56e-05	0.000133089	9.12e-05	0.000153886	5.14e-05	4.56e-05	9.75e-05	0.000277291	0.000163463
Desulfohalobium_retbaense	6.19e-05	2.08e-05	5.47e-05	1.02e-05	6.83e-05	3.64e-05	8.07e-05	2.64e-05	2.12e-05	5.2e-05	7.07e-05	4.33e-05	2.13e-05	0.000106778	2.92e-05	3.16e-05	1.97e-05	9.76e-05	3.34e-05	5.09e-05	3.58e-05	5.76e-05	9.11e-05	2.71e-05	2.35e-05	3.64e-05	3.58e-05	3.43e-05	6.5e-05	2.2e-05	3.82e-05	2.84e-05	5.24e-05	3.09e-05	3.8e-05	0.000155572	2.33e-05	3.17e-05	1.29e-05	8.63e-05	0.000107661	3.64e-05	4.63e-05	3.56e-05	3.16e-05	4.07e-05	8.91e-05	6.94e-05
Desulfomicrobium_baculatum	0.000174754	9.68e-05	0.000118956	0.000153687	0.000255819	0.000150454	0.000397012	9.87e-05	0.000156806	0.000116515	0.000229701	0.000106683	2.53e-05	0.000399338	6.71e-05	0.000299495	8.08e-05	0.000143574	0.000176043	0.000105709	0.000115495	0.000150218	0.000198839	4.96e-05	0.000137227	0.000131511	4.32e-05	0.000100669	0.000117904	8.66e-05	0.000121912	0.000100766	0.000113517	0.000124052	0.000184112	0.000237425	7.03e-05	0.00019115	4.32e-05	0.000257471	0.000269424	0.000194125	0.000108762	0.00012128	7.16e-05	9.71e-05	0.000306731	0.00015586
Desulfomonile_tiedjei	2.09e-05	1.04e-05	2.66e-05	9.09e-06	6.11e-05	1.46e-05	1.93e-05	2.72e-05	9.21e-05	3.52e-05	1.99e-05	5.36e-05	4.92e-06	4.75e-05	4.89e-05	0.000109996	6.07e-05	2.66e-05	3.78e-05	4.91e-05	2.12e-05	3.1e-05	2.41e-05	3.32e-05	3.03e-05	2e-05	1.12e-05	5.45e-05	1.39e-05	3.34e-05	1.88e-05	1.46e-05	3.18e-05	2.47e-05	3.38e-05	4.8e-05	1.9e-05	2.43e-05	1.28e-05	4.97e-05	7.41e-05	2.39e-05	1.71e-05	4.24e-05	3.52e-05	1.9e-05	6.52e-05	4.61e-05
Desulfosporosinus_acidiphilus	0.000172226	4.13e-05	8.76e-05	3.77e-05	0.000134993	0.000104083	0.000138608	7.04e-05	0.000423541	8.03e-05	0.000144667	3.64e-05	1.62e-05	0.000148749	0.000101843	0.000113808	0.000163492	0.000126577	7.03e-05	4.67e-05	5.31e-05	5.7e-05	0.00014708	6.78e-05	5.19e-05	4.56e-05	4.91e-05	0.000288725	0.000102052	0.000212277	9.91e-05	3.35e-05	0.0001	0.000100871	7.65e-05	0.00018794	4.73e-05	6.55e-05	1.64e-05	6.97e-05	9.36e-05	7.34e-05	3.44e-05	4.26e-05	4.35e-05	3.69e-05	0.000152422	8.67e-05
Desulfosporosinus_meridiei	6.32e-05	1.07e-05	2.1e-05	1.54e-05	1.11e-05	1.46e-05	4.5e-05	1.02e-05	2.86e-05	2.76e-05	4.58e-05	3.48e-05	1.15e-05	5.31e-05	2.86e-05	8.98e-05	4.99e-05	2.86e-05	1.99e-05	2.98e-05	1.67e-05	2.21e-05	2.39e-05	6.44e-06	2.68e-05	1.44e-05	1.67e-05	3.29e-05	1.37e-05	0.000103619	2.74e-05	1.9e-05	2.67e-05	4.03e-05	2.52e-05	2.08e-05	7.17e-06	6.97e-06	7.73e-06	2.03e-05	9.47e-05	2.79e-05	2.08e-05	1.05e-05	2.15e-05	1.26e-05	4.37e-05	2.23e-05
Desulfosporosinus_orientis	2.5e-05	1.07e-05	1.85e-05	1.06e-05	2.92e-05	1.72e-05	7.18e-05	2.58e-05	5.64e-05	3.02e-05	2.98e-05	4.14e-05	3.14e-05	3.7e-05	2.58e-05	5.72e-05	4.57e-05	3.1e-05	1.58e-05	2.54e-05	2.43e-05	1.4e-05	3.16e-05	2.08e-05	2e-05	1.86e-05	1.98e-05	2.94e-05	2.75e-05	9.45e-06	1.77e-05	4.35e-05	3.96e-05	4.82e-05	3.71e-05	4.69e-05	1.67e-05	3.01e-05	1.65e-05	7.85e-06	5.36e-05	2.51e-05	1.16e-05	2e-05	3.15e-05	2.47e-05	3.24e-05	3.94e-05
Desulfotalea_psychrophila	0.000156425	3.02e-05	8.23e-05	9.65e-05	0.000165824	6.09e-05	0.000144053	3.63e-05	4.81e-05	2.09e-05	6.46e-05	3.52e-05	2.55e-05	0.000117888	7.57e-05	8.66e-05	3.95e-05	0.000102182	5.04e-05	8.07e-05	7.95e-05	4.7e-05	0.000115463	4.66e-05	9.9e-05	2.28e-05	3.07e-05	5.73e-05	5.4e-05	9.51e-05	5.29e-05	4.8e-05	6.45e-05	6.75e-05	5.49e-05	0.000108629	4.2e-05	4.73e-05	7.97e-06	6.19e-05	0.000188272	9.06e-05	2.34e-05	5.58e-05	2.38e-05	5.51e-05	0.000125561	0.000157523
Desulfotomaculum_acetoxidans	0.000104283	2.7e-05	7.99e-05	3.9e-05	0.000101106	4.73e-05	0.000105441	6.6e-05	7.09e-05	0.000152477	8.17e-05	3.79e-05	2.79e-05	9.32e-05	5.78e-05	0.00023524	0.000148119	5.9e-05	6.45e-05	4.29e-05	2.57e-05	7.32e-05	0.000159025	5.55e-05	5.53e-05	3.03e-05	3.27e-05	9.44e-05	3.7e-05	8.63e-05	6.41e-05	4.35e-05	8.03e-05	6.47e-05	0.000114024	8.74e-05	4.19e-05	6.8e-05	1.27e-05	8.69e-05	9.2e-05	8e-05	6.8e-05	4.42e-05	5.72e-05	4.11e-05	0.000112791	8.86e-05
Desulfotomaculum_carboxydivorans	6.51e-05	4.12e-05	6.91e-05	2.57e-05	5.58e-05	3.23e-05	0.000206922	8.47e-05	0.000114493	7.34e-05	0.000134728	0.000105254	1.93e-05	0.000133319	7.78e-05	8.71e-05	0.000110933	5.66e-05	7.21e-05	4.63e-05	2.88e-05	8.47e-05	8.36e-05	3.29e-05	3.59e-05	4.08e-05	3.34e-05	9.23e-05	4.23e-05	5.17e-05	4.1e-05	7.09e-05	8.94e-05	8.48e-05	7.9e-05	0.00018167	8.41e-05	0.00011261	2.49e-05	0.000143556	0.000157975	7.4e-05	0.000108183	5.54e-05	5.63e-05	5.14e-05	0.000147893	9.67e-05
Desulfotomaculum_gibsoniae	0.000185814	6.11e-05	9e-05	5.94e-05	0.000132771	6.01e-05	0.000375231	4.01e-05	0.000199533	8.53e-05	0.000271665	9.33e-05	2.64e-05	0.000159859	0.00016615	0.00010564	0.000192575	9.08e-05	5.7e-05	7.13e-05	6.28e-05	0.000142109	0.000155043	4.15e-05	7.8e-05	6.25e-05	4.4e-05	0.00040827	6.98e-05	0.000352116	7.22e-05	3.91e-05	8.15e-05	6.02e-05	7.27e-05	0.000121678	6.24e-05	3.95e-05	2.66e-05	0.000129026	0.000492861	0.000111196	0.000166035	5.01e-05	3.78e-05	4.61e-05	0.000146131	0.00016869
Desulfotomaculum_kuznetsovii	3.73e-05	7.5e-05	6.83e-05	3.83e-05	5.86e-05	8.6e-05	0.000131677	3.33e-05	0.000153072	8.85e-05	0.000221418	9.43e-05	5.4e-05	0.000108013	3.11e-05	0.000100195	0.00012506	6.82e-05	5.6e-05	6.14e-05	3.75e-05	8.35e-05	9.77e-05	3.3e-05	9.16e-05	6.69e-05	4.7e-05	8.67e-05	6.31e-05	4.09e-05	9.37e-05	7.25e-05	7.19e-05	5.93e-05	0.000127346	0.000244712	6.71e-05	0.000169487	3.92e-05	0.00012147	0.000163385	0.000103713	7.58e-05	8.04e-05	0.000101206	7.89e-05	0.000176263	0.000124973
Desulfotomaculum_reducens	7.14e-05	5.54e-05	1.9e-05	3.43e-05	2.86e-05	2.72e-05	0.000128707	3.08e-05	1.91e-05	3.64e-05	3.87e-05	2e-05	1.15e-05	0.000180227	3.42e-05	9.53e-05	8.54e-05	2.8e-05	3.24e-05	8.98e-05	3.31e-05	7.38e-05	4.52e-05	7.45e-05	2.91e-05	3.62e-05	1.15e-05	2.24e-05	1.77e-05	1.13e-05	2.39e-05	3.08e-05	3.95e-05	2.9e-05	3.76e-05	3.56e-05	2.93e-05	3.28e-05	2.19e-05	3.43e-05	0.000101169	3.99e-05	4.8e-05	1.74e-05	7.55e-05	1.06e-05	8.89e-05	8.93e-05
Desulfotomaculum_ruminis	8.75e-05	7.43e-05	0.000113859	9.27e-05	0.000197767	0.00010839	0.000387607	9.04e-05	0.000216541	0.000249573	0.000457745	0.000179313	3.81e-05	0.000443778	0.00010369	0.000466123	0.000162245	0.000134776	0.000115398	7.53e-05	0.000102319	0.000250972	0.000231862	8.9e-05	0.000116028	0.000165339	5.83e-05	0.000174074	0.00010911	9.23e-05	0.000210564	9.88e-05	0.000137183	0.000140894	0.00016014	0.0003347	9.78e-05	0.000115282	6.41e-05	0.000260377	0.000122269	0.000190592	0.000252524	0.000150637	0.000114229	0.000175859	0.000250933	0.000194587
Desulfovibrio_aespoeensis	0.000127984	8.3e-05	8.49e-05	6.49e-05	9.61e-05	9.35e-05	0.000230683	7.12e-05	0.000101218	0.000107405	0.000159576	8.24e-05	5.52e-05	0.000189485	4.98e-05	0.0001296	9e-05	0.000134376	0.000120943	0.000116582	0.000105819	0.00011758	0.000182913	3.84e-05	6.5e-05	9.63e-05	7.86e-05	9.65e-05	0.000148334	7.43e-05	6.44e-05	8.59e-05	9.4e-05	6.92e-05	0.000117539	0.000205226	5.43e-05	0.000107552	5.95e-05	0.000139197	0.000142286	7.98e-05	8.19e-05	9.23e-05	8.55e-05	0.000105925	0.000192556	0.000169878
Desulfovibrio_africanus	0.000115976	6.46e-05	6.97e-05	4.21e-05	8.14e-05	0.000102182	0.000418298	0.000107484	0.000229816	7.79e-05	0.000307556	6.6e-05	0.000103731	0.000454271	3.11e-05	9.53e-05	5.13e-05	8.18e-05	9.32e-05	6.22e-05	7.82e-05	8.29e-05	0.000100005	3.37e-05	6.48e-05	0.000129737	5.02e-05	0.000111855	0.000122474	4.98e-05	0.00015733	8.85e-05	0.000126381	5.45e-05	0.000130193	0.000393675	5.32e-05	0.000100776	5.17e-05	0.000163607	0.000140663	0.000109325	4.92e-05	7.25e-05	0.000125144	7.88e-05	0.000170476	6.87e-05
Desulfovibrio_alaskensis	0.00011882	5.84e-05	0.000101714	7.22e-05	0.000150547	9.13e-05	0.000206427	0.000120679	0.000177547	8.61e-05	0.000141354	0.000124543	7.35e-05	0.000265403	6.18e-05	8.49e-05	0.000113218	5.5e-05	9.03e-05	7.89e-05	6.44e-05	7.1e-05	0.00015598	3.07e-05	6.26e-05	6.56e-05	4.2e-05	0.000126536	0.000117904	9.07e-05	0.000134469	6.96e-05	0.000123337	8.02e-05	0.000102284	0.000259456	5.92e-05	8.56e-05	3.66e-05	0.000100838	0.000143368	0.000129486	5.5e-05	8.31e-05	0.000102323	9.66e-05	0.000184567	0.000128775
Desulfovibrio_desulfuricans	0.000538797	0.000160919	0.00029636	0.000222224	0.000526916	0.000323524	0.000982135	0.000342244	0.000655016	0.000210974	0.000664255	0.000296712	0.00014402	0.00104124	0.000222763	0.000376274	0.000216465	0.000549301	0.000367333	0.000355787	0.000367072	0.000261716	0.000624154	0.00012165	0.000213855	0.000218551	0.000154166	0.000301309	0.000409829	0.000190546	0.000402609	0.000246478	0.000257083	0.000227821	0.000374761	0.000811583	0.000197383	0.000300133	0.000111332	0.000518138	0.000358691	0.000333172	0.00023835	0.000170452	0.00026976	0.000303943	0.000627301	0.000473045
Desulfovibrio_gigas	0.000145049	8.85e-05	8.95e-05	6.49e-05	0.000203322	0.00012125	0.000203456	0.00014432	0.000244335	8.75e-05	0.000182767	8.57e-05	6e-05	0.000177141	6.15e-05	6.86e-05	6.32e-05	0.000130776	6.91e-05	7.67e-05	6.69e-05	0.00012204	0.000211018	3.01e-05	8.97e-05	9.01e-05	4.63e-05	0.000114651	0.000120681	8.03e-05	0.000109542	0.000116694	0.000109295	0.000117351	0.000150403	0.000311991	6.28e-05	0.000135418	4.4e-05	0.000160701	0.000100628	9.93e-05	9.72e-05	7.06e-05	8.92e-05	0.000145247	0.000211617	0.000110005
Desulfovibrio_magneticus	0.000220575	0.000143117	0.000162548	0.000136657	0.000209155	0.000225143	0.000420774	0.000237784	0.00018294	0.000141928	0.000266144	0.000201459	8.51e-05	0.000376501	0.000108305	0.000123065	0.000129214	0.00027895	0.000170152	0.00020417	0.0001367	0.000157111	0.000335849	4.38e-05	0.000149947	0.00015723	9.39e-05	0.00021532	0.00024894	0.000144248	0.000127052	0.000165418	0.000193549	0.000141528	0.000198769	0.00044621	9.49e-05	0.000223979	0.000123528	0.000231026	0.000171501	0.000199113	0.000205086	0.000133757	0.000191374	0.000254118	0.000373915	0.000293663
Desulfovibrio_piezophilus	3.07e-05	9.02e-06	7.81e-06	2.29e-05	2.94e-05	2.17e-05	7.28e-05	3.19e-05	6.39e-05	1.22e-05	3.7e-05	1.48e-05	1.71e-05	6.6e-05	2.55e-05	3.21e-05	2.95e-05	1.04e-05	2.84e-05	1.81e-05	1.52e-05	3.79e-05	2.46e-05	7.53e-06	3.03e-05	1.99e-05	6.87e-06	1.54e-05	2.36e-05	5.67e-06	3.84e-05	1.61e-05	2.91e-05	1.23e-05	2.5e-05	3.49e-05	8.52e-06	8.68e-06	3.73e-05	2.67e-05	3.79e-06	1.68e-05	2.26e-05	2.97e-05	3.89e-05	9.22e-06	2.68e-05	2.26e-05
Desulfovibrio_salexigens	8.75e-05	2.38e-05	3.6e-05	4.26e-05	6.69e-05	2.71e-05	0.000438595	4.01e-05	2.57e-05	3.04e-05	9.72e-05	3.24e-05	3.76e-05	0.000204916	0.00010369	0.00014648	0.000186551	5.18e-05	0.000123022	4.87e-05	4.14e-05	3.73e-05	5.53e-05	5.4e-05	3.87e-05	3.71e-05	1.65e-05	6.43e-05	4.47e-05	3.09e-05	5.66e-05	2.46e-05	5.55e-05	6.08e-05	4.04e-05	0.000135066	3.84e-05	3.17e-05	4.81e-05	5.43e-05	6.71e-05	5.3e-05	4.54e-05	7.65e-05	4.42e-05	3.86e-05	9.42e-05	3.37e-05
Desulfovibrio_vulgaris	0.00042219	0.000296914	0.000219478	0.000192866	0.000413311	0.000318076	0.000614329	0.000456325	0.000558776	0.00034523	0.000636095	0.000276947	0.00024447	0.000575862	0.000189841	0.000179152	0.000206494	0.000462717	0.000233049	0.000336457	0.000264136	0.000282394	0.000420162	8.84e-05	0.000311683	0.000361338	0.000254682	0.000355139	0.00047202	0.000287866	0.000265722	0.000359477	0.00030687	0.000329779	0.000365728	0.000685669	0.000134936	0.000283433	0.000132946	0.000507677	0.000307835	0.000275391	0.000330625	0.000210818	0.000323463	0.000395138	0.000587104	0.000395115
Desulfurispirillum_indicum	0.000140625	7.86e-05	8.24e-05	4.37e-05	0.000199711	9.36e-05	0.000221772	7.39e-05	0.000314856	0.000115556	0.000212584	0.000134306	6.33e-05	0.000305522	6.4e-05	0.00024014	0.000158714	0.000143174	0.000134458	0.000102085	9.35e-05	0.000118999	0.000184319	5.52e-05	9.2e-05	0.0001438	0.000133376	0.000171977	0.000151979	0.000120311	0.000189369	9.43e-05	0.000125399	0.00013356	0.00010949	0.000288943	7.64e-05	0.000118717	0.000105174	0.000137453	0.000207748	0.000210129	9.69e-05	0.000159627	0.000120927	7.4e-05	0.000183309	0.000216921
Desulfurivibrio_alkaliphilus	8.75e-05	3.89e-05	7.42e-05	4.22e-05	7.22e-05	6.75e-05	0.000211377	0.000100611	0.000100389	6.19e-05	0.000137489	8.33e-05	3.5e-05	9.01e-05	2.58e-05	9.04e-05	4.45e-05	9.86e-05	4.25e-05	7.23e-05	7e-05	4.91e-05	8.83e-05	2.41e-05	3.83e-05	3.69e-05	3.17e-05	7.13e-05	0.000107606	7.02e-05	4.72e-05	7.14e-05	8.11e-05	6.68e-05	7.55e-05	0.000199634	4.35e-05	5.79e-05	3.27e-05	7.88e-05	6.38e-05	5.3e-05	5.7e-05	5.25e-05	7.43e-05	8.74e-05	0.00017576	0.000107154
Desulfurobacterium_thermolithotrophum	6.54e-05	1.46e-05	2.21e-05	1.23e-05	6.11e-05	3.59e-05	6.09e-05	4.4e-05	5.35e-05	0.000146723	0.000126998	4.45e-05	3.43e-05	0.000230221	5.94e-05	0.000100739	4.94e-05	3.16e-05	3.15e-05	4.29e-05	5.27e-05	5.01e-05	5.41e-05	6.23e-05	3.64e-05	0.000146841	0.00018403	0.000104165	7.9e-05	3.81e-05	5.48e-05	7.48e-05	9.89e-05	0.000117351	5.49e-05	0.000316906	3.44e-05	1.21e-05	4.03e-05	8.4e-05	7.63e-05	4.78e-05	1.88e-05	3.23e-05	0.000107408	6.48e-05	6.39e-05	2.49e-05
Desulfurococcus_fermentans	0	0	0	0	0	0	0	0	0	0	0	0	0	0	0	0	0	0	0	0	0	4.05e-07	0	0	0	0	0	0	0	0	0	2.09e-07	0	0	0	0	0	0	0	0	0	0	0	0	0	0	0	0
Desulfurococcus_kamchatkensis	0	0	0	0	0	0	0	0	0	0	0	0	0	0	0	0	0	0	0	0	0	0	0	0	0	0	0	0	0	0	0	0	0	0	1.41e-07	0	0	0	0	0	0	0	0	0	0	0	0	0
Desulfurococcus_mucosus	0	0	0	0	0	0	0	0	0	0	0	0	0	0	0	0	0	0	0	0	0	0	0	0	0	0	0	0	0	0	0	0	0	0	0	0	0	0	0	0	0	0	0	0	0	0	0	0
Dichelobacter_nodosus	0.000218679	2.38e-05	9.87e-05	7.57e-05	0.000163324	8.17e-05	0.000396022	8.19e-05	0.000376665	3.67e-05	0.000163993	8.29e-05	8.66e-05	0.000134553	9.54e-05	0.000163361	0.000316804	0.000138775	6.53e-05	8.38e-05	7.27e-05	0.000102578	0.000120147	0.000111376	0.000140847	7.4e-05	4.43e-05	0.000246779	9.28e-05	0.00019401	0.000130878	1.95e-05	6.65e-05	5.68e-05	6.02e-05	0.000131846	5.4e-05	7.42e-05	2.45e-05	3.95e-05	0.000165549	6.51e-05	9.52e-05	4e-05	0.000150941	2.83e-05	0.000102852	9.53e-05
Dickeya_dadantii	9.64e-05	9.33e-05	0.000135113	8.01e-05	0.000197211	0.00016287	0.000282166	0.000134698	0.000212808	0.000123228	0.000126998	0.000123828	8.22e-05	0.000220963	8.43e-05	0.000198211	0.000124644	0.000206563	7.49e-05	0.000151215	0.000125789	0.000135419	0.000245914	4.66e-05	9.43e-05	0.000124669	6.86e-05	0.000143314	0.000193864	7.46e-05	0.000133037	0.000117613	0.000158885	0.000143067	0.000134446	0.000402657	6.54e-05	7.52e-05	5.45e-05	0.000149077	0.000181239	0.000130317	7.61e-05	0.000107335	9.62e-05	0.000184184	0.000249172	0.000182708
Dickeya_zeae	4.11e-05	1.13e-05	2.4e-05	2.5e-05	0.000151936	3.37e-05	5.3e-05	6.05e-06	9.13e-06	2.09e-05	3.26e-05	1.14e-05	2.08e-05	0.000101841	8.31e-06	0.000131778	1.97e-05	1.98e-05	1.87e-05	2.68e-05	3.48e-05	1.64e-05	1.66e-05	0.000119732	0.000119441	4.16e-05	4.14e-05	1.89e-05	3.52e-05	1.45e-05	1.95e-05	4.03e-05	8.54e-06	2.59e-05	1.41e-05	6.71e-05	3.85e-05	1.48e-05	1.75e-05	3.11e-05	5.19e-05	6.65e-05	1.85e-05	2.18e-05	2.6e-05	2.6e-05	2.01e-05	8.13e-05
Dictyoglomus_thermophilum	5.37e-06	2.66e-07	4.77e-06	3.24e-06	1.14e-05	1.39e-05	1.29e-05	7.42e-06	1.49e-05	7.91e-06	2.37e-05	2.86e-06	2.73e-06	6.17e-06	5.23e-06	3.1e-05	1.83e-05	1.58e-05	1.33e-05	1.35e-05	9.26e-06	6.49e-06	1.66e-05	1.22e-05	6e-06	5.7e-06	1.06e-06	4.19e-06	8.74e-06	4.72e-06	1.31e-05	3.15e-06	1.94e-05	1.81e-06	1.49e-05	5.76e-06	3.8e-06	2.77e-06	0	2.5e-05	3.52e-05	7.07e-06	8.39e-06	1.65e-06	1.15e-05	4.23e-06	1.73e-05	6.89e-06
Dictyoglomus_turgidum	1.26e-06	2.46e-06	8.24e-06	3.13e-06	2.78e-06	2.47e-06	1.78e-05	9.9e-06	0	6.23e-06	3.87e-06	3.33e-06	3.65e-07	0	1.42e-05	1.42e-05	5.4e-06	5.2e-06	1.96e-05	8.05e-07	4.12e-07	1.64e-05	2.46e-05	5.48e-07	5.38e-06	2.03e-06	0	8.39e-06	9.83e-07	2.77e-05	3.43e-06	6.49e-06	4.52e-06	2.17e-06	9.21e-06	1.03e-05	1.77e-06	5.92e-06	0	5.81e-06	7.2e-05	1.75e-05	8.39e-06	1.06e-05	2.48e-07	7.69e-07	1.22e-05	3.33e-06
Dinoroseobacter_shibae	8.79e-05	2.86e-05	2.62e-05	5.76e-05	7.28e-05	3.76e-05	0.000114846	1.15e-05	3.15e-05	4.27e-05	5.25e-05	1.5e-05	1.11e-05	5.37e-05	3.45e-05	3.65e-05	2.47e-05	0.000142374	5.53e-05	4.81e-05	6.63e-05	3.49e-05	4.78e-05	1.86e-05	4.33e-05	5.7e-05	1.57e-05	4.19e-05	2.13e-05	1.2e-05	3.58e-05	3.71e-05	3.15e-05	2.19e-05	5.12e-05	7.73e-05	1.6e-05	3.31e-05	1.23e-05	6.77e-05	3.84e-05	2.47e-05	2.43e-05	2.17e-05	3.27e-05	3.93e-05	6.5e-05	9.41e-05
Dyadobacter_fermentans	0.00019877	6.67e-05	0.000131426	0.000103433	0.000145825	0.000137594	0.000403943	0.000190227	0.000266321	0.000207378	0.000333508	0.000174789	0.000290775	0.000420941	0.000111074	0.00036375	0.000237655	0.000193365	9.17e-05	0.000157456	0.000148023	0.000165625	0.000212892	9.44e-05	9.09e-05	0.000135692	0.000137692	0.000109058	0.0002107	5.64e-05	0.000130361	0.000118177	0.000100261	0.000161539	0.000103233	0.000437906	0.000110548	6.82e-05	6.47e-05	0.000166804	0.000149319	0.000173341	0.000143473	8.57e-05	0.000162724	0.000106053	0.00020325	0.000170353
Echinicola_vietnamensis	0.000106811	4.73e-06	5.74e-05	3.36e-05	5.44e-05	5.31e-05	9.85e-05	0.000185554	0.000116982	5.18e-05	5.74e-05	3.36e-05	1.28e-05	0.000171586	2.12e-05	4.74e-05	4.38e-05	3.52e-05	2.1e-05	2.4e-05	2.51e-05	5.01e-05	5.6e-05	1.44e-05	3.97e-05	1.19e-05	1.84e-05	8.39e-06	5.52e-05	9.76e-06	8.92e-05	4.67e-05	0.000157805	1.24e-05	3.04e-05	9.73e-05	3.24e-05	1.15e-05	1.11e-05	2.15e-05	0.000113612	4.24e-05	2.02e-06	2.99e-05	2.94e-05	4.01e-05	5.03e-05	4.18e-05
Edwardsiella_ictaluri	1.83e-05	2.01e-05	2.47e-05	1.4e-05	2.81e-05	2.93e-05	8.27e-05	1.92e-05	3.15e-05	1.53e-05	3.75e-05	1.12e-05	1.15e-05	4.44e-05	1.78e-05	3.05e-05	1.5e-05	3.54e-05	3.85e-05	2.11e-05	2.22e-05	2.09e-05	2.48e-05	9.59e-06	3.23e-05	3.26e-05	7.14e-06	1.82e-05	1.72e-05	2.55e-05	3.08e-05	2.02e-05	2.53e-05	1.2e-05	3e-05	6.46e-05	2.88e-05	4.08e-05	7.37e-06	4.27e-05	3.52e-05	4.82e-05	1.33e-05	2.79e-05	1.24e-05	2.77e-05	6.38e-05	3.52e-05
Edwardsiella_tarda	9.01e-05	5.76e-05	4.12e-05	4.79e-05	6.69e-05	6.55e-05	0.000300482	7.45e-05	0.000106611	8.22e-05	0.000128655	5.29e-05	2.06e-05	5.74e-05	3.17e-05	4.14e-05	3.91e-05	7.46e-05	3.47e-05	6.56e-05	5.27e-05	4.93e-05	7.19e-05	2.44e-05	2.91e-05	5.97e-05	4.58e-05	9.93e-05	9.96e-05	4.25e-05	4.23e-05	7.26e-05	3.25e-05	6.8e-05	6.95e-05	0.000139642	2.59e-05	5.24e-05	1.63e-05	8.81e-05	3.95e-05	5.01e-05	4.17e-05	2.53e-05	6.66e-05	9.7e-05	8.98e-05	5.18e-05
Eggerthella_lenta	0.000818466	0.00164097	0.000513994	0.000224941	0.000711628	0.00053606	0.0010455	0.00134781	0.00157345	0.00112943	0.00102206	0.000675103	0.000634053	0.00143749	0.000343068	0.000435084	0.000357521	0.00101302	0.000493647	0.000753858	0.000488126	0.000584452	0.000836343	0.000144802	0.000539085	0.00135793	0.000781843	0.000781585	0.000980083	0.000435893	0.000456429	0.00197506	0.00099308	0.00073082	0.00138541	0.00216852	0.000271981	0.000650559	0.000263598	0.0009212	0.000476631	0.00065408	0.000772903	0.000431727	0.000658585	0.000963445	0.00111929	0.000901422
Eggerthella_sp._YY7918	0.000205723	0.000490775	0.000128065	7.31e-05	0.00018249	0.000197142	0.000326223	0.000343618	0.000441794	0.000445443	0.000233014	0.000226463	0.000206368	0.000353664	9.54e-05	9.58e-05	0.000229138	0.000226159	0.000108467	0.000111146	0.000143288	0.000139271	0.000175419	4.64e-05	0.000229574	0.000349935	0.000295558	0.000124438	0.000247552	0.000161255	0.000233707	0.000642612	0.000334267	0.000237872	0.000464848	0.000517048	6.61e-05	0.000228273	9.72e-05	0.000319369	0.00041171	0.000218858	0.000271905	7.85e-05	0.000357695	0.000274739	0.000255777	0.000237829
Ehrlichia_canis	0.000208567	5.01e-05	0.000270877	7.55e-05	0.000643298	0.000261125	0.0012148	0.000525323	0.00086575	0.00025173	0.000221418	0.000358864	0.000414195	0.00113321	0.000250763	0.000520032	0.000874794	0.000397528	0.000511841	0.000348337	0.000668883	0.000346049	0.000675445	0.000275083	0.00025067	8.6e-05	0.000268337	0.000225108	0.000347521	0.000312747	0.000126137	0.00028253	0.000237346	0.000235427	0.000264674	0.000561109	0.000155358	0.0002507	0.000103	0.000434446	0.000530191	0.000478246	9.23e-05	0.000106051	9.64e-05	7.83e-05	0.000557538	0.000315759
Ehrlichia_chaffeensis	0	1.53e-06	1.95e-06	1.25e-06	0	1.27e-06	9.9e-07	5.22e-06	2.65e-05	1.92e-06	2.76e-06	2.14e-06	0	0	1.32e-05	3.49e-05	1.72e-05	2.8e-06	2.48e-05	4.03e-06	0	5.07e-06	1.52e-05	9.59e-07	6.51e-06	2.28e-06	2.64e-06	0	5.79e-07	1.57e-06	2.82e-07	1.73e-06	6.78e-06	8.15e-07	3.59e-06	4.07e-06	3.38e-07	0	0	0	4.44e-05	4.16e-07	0	6.42e-06	1.24e-06	5.12e-07	3.33e-06	2.38e-06
Ehrlichia_ruminantium	6.57e-05	6.19e-06	3.05e-05	7.1e-06	5.67e-05	1.94e-05	3.86e-05	2.64e-05	7.84e-05	1.34e-05	2.6e-05	1.91e-05	4.56e-06	6.79e-05	2.58e-05	9.09e-05	2.76e-05	6.2e-05	1.77e-05	2.88e-05	2.45e-05	2.25e-05	4.61e-05	2e-05	9.93e-06	6.33e-06	1.67e-05	1.96e-05	2.82e-05	3.72e-05	1.52e-05	1.32e-05	4.07e-05	6.25e-06	3.25e-05	9.22e-05	9.2e-06	1.21e-05	1.21e-06	5.49e-05	1.3e-05	2.16e-05	7.81e-06	6.79e-06	2.77e-05	5.47e-05	5.64e-05	3.54e-05
Elusimicrobium_minutum	0.00153455	1.1e-05	0.000300914	2.5e-05	0.000313038	5.85e-05	0.000104451	0.00071665	0.000239357	3.69e-05	5.74e-05	0.00110564	2.55e-05	6.48e-05	0.000131381	0.00174905	5.51e-05	8.78e-05	5.35e-05	8.5e-05	0.000104995	3.83e-05	0.000623217	5.14e-05	2.95e-05	1.38e-05	4.54e-05	0.00019994	0.000118945	0.00012787	0.000576534	0.0027423	0.00245103	4.12e-05	0.000166678	7.88e-05	3.12e-05	2.87e-05	1.46e-05	0.000138325	0.000527486	7.38e-05	0.000733853	3.93e-05	0.000111129	9.76e-05	0.000214259	5.11e-05
Emticicia_oligotrophica	0.000619696	9.41e-05	0.000455654	0.000150344	0.000456086	0.000367995	0.000325728	0.000445604	0.000821778	0.000432257	0.000667568	0.000416254	0.000282206	0.000732017	0.000318761	0.00063983	0.000360222	0.00089084	0.000242405	0.000519687	0.000426364	0.000448627	0.000682237	0.000222752	0.000197827	3.72e-05	0.0001406	0.000163588	0.000561866	0.000288181	0.000322101	0.000203913	0.000247264	0.000236061	0.000343127	0.00146099	0.000237383	0.000135513	3.59e-05	0.00034436	0.00035328	0.000314466	0.000249921	0.00016348	0.000230319	0.000301509	0.000724617	0.000678324
Enterobacter_aerogenes	3.51e-05	1.72e-05	2.59e-05	5.33e-06	3.17e-05	1.89e-05	0.000101976	3.05e-05	1.45e-05	2.76e-05	2.43e-05	1.93e-05	5.65e-06	8.89e-05	2.83e-05	3.27e-05	3.84e-05	2.54e-05	7.38e-05	2.76e-05	3.44e-05	3.14e-05	3.04e-05	1.92e-05	4.28e-05	3.83e-05	1.34e-05	2.1e-05	2.52e-05	8.5e-06	2.3e-05	2.53e-05	3.19e-05	1.92e-05	3.34e-05	5.15e-05	1.57e-05	3.04e-05	1.36e-05	5.2e-05	5.9e-05	3.85e-05	2.46e-05	1.78e-05	1.58e-05	1.32e-05	6.58e-05	2.8e-05
Enterobacter_asburiae	1.74e-05	9.92e-06	1.28e-05	4.81e-06	3e-05	1.11e-05	1.78e-05	1.24e-05	3.73e-06	6.95e-06	3.26e-05	9.76e-06	5.65e-06	3.27e-05	8.31e-06	5.99e-06	2.95e-05	1.44e-05	1.35e-05	4.63e-06	1.01e-05	8.11e-06	2.06e-05	1.15e-05	9.72e-06	2.27e-05	1.28e-05	1.61e-05	9.89e-06	4.72e-06	1.33e-05	1.16e-05	8.74e-06	1.69e-05	1.52e-05	2.02e-05	1.5e-05	2.82e-05	7.12e-06	3.95e-05	1.35e-05	9.77e-06	6.65e-06	1.01e-05	1.76e-05	5.25e-06	1.96e-05	6.41e-06
Enterobacter_cloacae	0.000206987	7.62e-05	0.000102365	5.42e-05	0.000233043	8.86e-05	0.000285136	8.38e-05	0.000207415	8.49e-05	0.000117611	8.41e-05	4.61e-05	0.000459825	3.88e-05	0.000346869	0.000144172	8.56e-05	9.62e-05	9.3e-05	0.000112819	7.3e-05	0.000169798	6.32e-05	8.57e-05	0.000104651	5.5e-05	5.73e-05	9.74e-05	6.83e-05	0.0002292	0.000108052	0.000100653	7.24e-05	0.000109314	0.000224207	6.64e-05	8.25e-05	6.91e-05	0.000147915	0.000116858	0.000140709	7.46e-05	7.28e-05	0.000146724	6.7e-05	0.000155882	0.000114281
Enterobacteriaceae_bacterium_strain_FGI_57	2.97e-05	1.04e-05	2.48e-05	3.73e-05	2.83e-05	4.94e-05	0.000140588	3.16e-05	9.5e-05	5.06e-05	4.97e-05	1.43e-06	4.74e-06	2.72e-05	1.02e-05	1.31e-05	2.14e-05	3.26e-05	2.08e-05	1.05e-05	1.79e-05	2.09e-05	2.39e-05	1.01e-05	4.65e-06	4.56e-06	1.76e-06	1.96e-05	1.4e-05	1.76e-05	6.3e-05	1.54e-05	4.32e-06	2.16e-05	3.93e-05	0.000110493	3.05e-05	7.83e-06	1.33e-06	1.83e-05	4.33e-05	2.08e-05	1.39e-05	1.28e-05	2.33e-05	1.42e-05	5.93e-05	2.8e-05
Enterobacter_lignolyticus	3.41e-05	2.61e-05	3.4e-05	1.87e-05	3.69e-05	3.02e-05	5.84e-05	2.75e-05	4.77e-05	2.71e-05	1.71e-05	1.62e-05	1.57e-05	4.75e-05	1.23e-05	3.16e-05	2.49e-05	3.12e-05	3.53e-05	2.44e-05	2.06e-05	3.97e-05	7.4e-05	1.37e-05	4.41e-05	3.64e-05	1.17e-05	2.8e-06	1.32e-05	1.98e-05	3.63e-05	2.5e-05	3.39e-05	2.41e-05	3.48e-05	8.51e-05	2.27e-05	2.4e-05	9.42e-06	4.24e-05	5.84e-05	3.62e-05	2.23e-05	1.39e-05	3.29e-05	2.28e-05	6.5e-05	2.83e-05
Enterobacter_sp._638	1.71e-05	7.72e-06	1.16e-05	2.82e-06	1.86e-05	1.01e-05	1.58e-05	1.18e-05	1.08e-05	1.37e-05	1.33e-05	6.67e-06	1.79e-05	4.94e-06	1.14e-05	1.74e-05	3.18e-05	1.24e-05	2.06e-05	9.06e-06	8.03e-06	2.84e-06	5.15e-06	5.07e-06	9.93e-06	8.74e-06	9.43e-06	5.59e-06	1.02e-05	6.93e-06	1.08e-05	1.22e-05	2.02e-05	1.12e-05	1.2e-05	2.12e-05	8.95e-06	1.26e-05	1.46e-05	1.22e-05	2.65e-05	1.21e-05	5.79e-06	9.91e-06	1.9e-05	9.86e-06	1.18e-05	9.27e-06
Enterobacter_sp._R4-368	2.15e-05	8.72e-06	1.3e-05	9.19e-06	3.22e-05	8.3e-06	0.000125242	9.9e-06	2.99e-05	5.03e-06	2.26e-05	4.29e-06	5.29e-06	1.23e-05	4.31e-06	6.32e-05	4.49e-05	2.18e-05	9.01e-06	1.93e-05	7e-06	1.03e-05	1.45e-05	8.08e-06	9.62e-06	2.33e-05	3.08e-06	2.45e-05	8.62e-06	2.17e-05	1.59e-05	1.04e-05	6.38e-06	9.24e-06	7.35e-06	2.03e-05	5.4e-06	4.49e-06	6.76e-06	7.56e-06	1.79e-05	1.21e-05	6.65e-06	1.16e-05	5.09e-06	9.99e-06	2.78e-05	1.4e-05
Enterococcus_casseliflavus	3.79e-06	2.83e-06	1.85e-05	7.94e-06	2.39e-05	1.32e-05	4.26e-05	3.19e-05	1.99e-05	1.92e-06	1.21e-05	0.000199316	7.66e-06	1.48e-05	1.6e-05	5.06e-05	7.04e-05	1.8e-06	4.52e-05	1.69e-05	8.85e-06	1.87e-05	1.24e-05	1.22e-05	1.31e-05	4.81e-06	3.38e-05	5.52e-05	2.83e-05	2.96e-05	3.01e-05	0.000175229	4.6e-05	3.6e-05	0.000353039	4.32e-05	6.67e-06	1.31e-05	5.31e-06	3.78e-06	2e-05	1.79e-05	3.18e-06	1.45e-05	2.28e-05	1.22e-05	4e-05	1.26e-05
Enterococcus_faecalis	3.76e-05	2.75e-05	3.84e-05	1.01e-05	3.5e-05	2.56e-05	3.07e-05	1.4e-05	2.86e-05	4.03e-05	5.69e-05	1.57e-05	1.08e-05	7.34e-05	1.88e-05	6.32e-05	5.11e-05	5.56e-05	2.1e-05	5.21e-05	1.69e-05	2.86e-05	3.63e-05	3.19e-05	2.87e-05	1.41e-05	2.05e-05	0.000102067	1.55e-05	1.32e-05	3.6e-05	1.58e-05	2.02e-05	2.34e-05	5.27e-05	9.49e-05	9.78e-05	5.21e-05	3.31e-05	2.38e-05	2.76e-05	4.22e-05	1.76e-05	2.83e-05	6.52e-05	1.54e-05	8.32e-05	1.81e-05
Enterococcus_faecium	0.000169065	0.000101523	0.000205706	0.000105941	0.000223043	0.000254156	0.000377211	0.000209745	0.000307389	0.000223681	0.0003059	0.000252419	0.000203998	0.000385142	0.000123997	0.000266278	0.000132331	0.000128377	0.000115918	0.00010873	0.000165316	0.000122445	0.000181508	6.79e-05	0.000158117	0.000505771	0.000183061	0.00031529	0.000215675	0.000106769	0.000178924	0.000155648	0.000310798	0.000195676	0.000236906	0.000571955	0.00229459	0.000176072	0.000172673	0.000274907	0.000206666	0.000481155	0.000208267	0.000153205	0.000260457	0.000158696	0.000302076	0.00020718
Enterococcus_hirae	3.48e-05	3.39e-06	7.37e-06	8.57e-06	2.64e-05	2.31e-05	0.00062126	2.03e-05	3.57e-05	1.01e-05	3.7e-05	1.24e-05	9.88e-05	4.69e-05	1.23e-05	5.39e-05	2.64e-05	9e-06	5.89e-05	1.31e-05	1.44e-06	1.36e-05	7.45e-05	0.000300153	1.3e-05	0.000104904	3.79e-06	6.99e-06	3.18e-06	1.26e-05	1.09e-05	1.41e-05	1.32e-05	1.77e-05	2.03e-05	7.59e-05	0.156346	8.21e-06	6.16e-06	6.1e-06	2.81e-05	2.56e-05	1.24e-05	5.69e-06	1.9e-05	1.28e-05	2.85e-05	0.000159899
Enterococcus_sp._7L76	0	3.23e-06	1.95e-06	0	5.56e-07	1.65e-06	0	5.5e-07	0	0	0	5.72e-06	0	0	0	1.31e-05	4.99e-06	2.8e-06	3.81e-06	1.05e-05	0	0	4.68e-07	1.37e-06	4.55e-06	5.07e-07	2.91e-06	0	1.04e-06	0	4.91e-05	4.18e-08	3.73e-06	0	1.48e-06	4.07e-06	3.63e-06	5.15e-06	2.42e-07	9.88e-06	0	3.74e-06	5.21e-06	1.47e-06	6.33e-06	0	3.59e-06	0
Erwinia_amylovora	1.61e-05	2.73e-06	6.94e-06	3.34e-06	2.06e-05	1.65e-06	3.47e-06	4.4e-06	0	3.6e-06	5.52e-06	2.62e-06	2.92e-06	7.41e-06	1.85e-06	1.09e-05	6.65e-06	1.38e-05	2.77e-06	6.85e-06	4.32e-06	2.03e-06	1.66e-05	2.19e-06	1.86e-06	5.45e-06	7.05e-07	0	2.02e-06	1.26e-06	4.62e-06	8.52e-06	7.76e-06	3.44e-06	5.24e-06	4.91e-06	4.3e-06	1.53e-06	4.35e-06	2.41e-05	2.65e-05	2.7e-06	1.74e-06	3.3e-06	6.57e-06	1.15e-06	1.59e-05	7.6e-06
Erwinia_billingiae	6.13e-05	1.5e-05	2.39e-05	1.34e-05	5.19e-05	1.32e-05	9.41e-06	1.51e-05	1.04e-05	4.08e-05	3.2e-05	1.29e-05	4.58e-05	4.51e-05	1.66e-05	1.63e-06	1.33e-05	1.64e-05	4.21e-05	1.43e-05	2.76e-05	1.82e-05	5.01e-05	1.96e-05	1.4e-05	3.74e-05	4.77e-05	2.1e-05	3.4e-05	1.42e-05	1.93e-05	3.04e-05	2.93e-05	2.67e-05	2.67e-05	5.73e-05	1.39e-05	1.9e-05	1.18e-05	1.39e-05	4.49e-05	2.47e-05	2.08e-05	1.3e-05	1.64e-05	2.81e-05	4.02e-05	2.76e-05
Erwinia_pyrifoliae	0	9.32e-07	1.3e-06	0	0	0	0	6.87e-06	0	1.44e-06	0	1.43e-06	1.09e-06	0	0	0	1.66e-06	0	0	4.03e-07	3.71e-06	0	0	1.64e-06	1.55e-06	4.18e-06	2.38e-06	5.59e-06	1.56e-06	3.78e-06	2.04e-06	1.42e-06	1.18e-06	2.72e-07	2.6e-06	2.03e-06	0	0	0	0	0	0	5.79e-06	4.59e-06	9.92e-07	1.28e-06	1.26e-06	0
Erwinia_sp._Ejp617	4.8e-05	1.99e-05	1.12e-05	1.22e-05	2.03e-05	9.19e-06	0	6.05e-06	1.37e-05	0	2.54e-05	1.43e-06	3.28e-06	9.26e-06	1.11e-05	0	2.91e-06	1.2e-05	7.28e-06	3.62e-06	2.39e-05	8.72e-06	9.13e-06	1.23e-06	5.07e-06	2.53e-07	6.87e-06	1.61e-05	1.74e-07	1.51e-05	6.71e-06	1.37e-05	9.13e-06	9.05e-07	1.01e-05	6.61e-06	1.1e-06	3.15e-06	1.45e-06	0	2.22e-05	8.11e-06	5.79e-06	1.54e-05	1.69e-05	6.53e-06	1.08e-05	1.78e-05
Erwinia_tasmaniensis	3.38e-05	2.58e-05	1.41e-05	3.77e-05	3.92e-05	4.09e-05	3.96e-05	6.08e-05	5.52e-05	2.28e-05	1.55e-05	2.29e-05	1.48e-05	6.17e-05	2.34e-05	5.99e-06	6.44e-06	9.86e-05	2.6e-05	1.53e-05	3.52e-05	1.3e-05	3.63e-05	1.33e-05	2.45e-05	3.37e-05	1.09e-05	3.01e-05	2.81e-05	3.97e-05	2.74e-05	3.28e-05	1.74e-05	3.19e-05	3.02e-05	2.81e-05	8.44e-06	3.03e-05	3.74e-06	3.02e-05	3.95e-05	1.64e-05	2.14e-05	1.89e-05	2.07e-05	3.29e-05	4.12e-05	3.61e-05
Erysipelothrix_rhusiopathiae	0.000233848	0.000160386	0.000158536	0.000176045	0.000214155	0.00024193	0.000461366	0.000344168	0.000921337	0.000172855	0.000149637	0.000155738	0.000148395	0.000393783	0.000289531	0.000642552	0.000631115	0.00016777	0.000238593	0.000198935	0.000202168	0.000144745	0.000296737	0.000179325	0.000191105	0.000214117	0.000118576	0.000544593	0.000159674	0.00026141	0.000140173	0.000198714	0.000303433	0.000116084	0.000279471	0.000476714	6.66e-05	0.000188001	0.000103	0.000179881	0.000308376	0.000157337	0.000204507	0.000143114	0.000179468	0.000147937	0.000277102	0.000209318
Erythrobacter_litoralis	0.000176018	6.69e-05	7.18e-05	0.000106149	0.000191656	6.49e-05	0.000157419	6.93e-05	8.75e-05	7.24e-05	7.07e-05	7.95e-05	5.2e-05	0.000119123	6.09e-05	3.1e-05	4.86e-05	0.000151773	5.89e-05	0.000105508	8.28e-05	6.06e-05	0.000153872	4.41e-05	0.000107135	0.000111366	5.22e-05	6.57e-05	9.31e-05	4.98e-05	7.32e-05	8.18e-05	5.28e-05	5.26e-05	7.2e-05	0.000114222	4.72e-05	3.75e-05	2.83e-05	0.000112753	7.79e-05	8.36e-05	8.88e-05	7.36e-05	5.64e-05	7.63e-05	0.000140218	9.41e-05
Escherichia_coli	0.000337499	8.68e-05	0.000389182	0.000113672	0.00130771	0.000264102	0.00135539	0.000794445	0.00115655	0.000319338	0.000261174	0.000741065	0.000488392	0.00128196	0.000404605	0.000787399	0.00177286	0.000552301	0.0105262	0.000605462	0.00274203	0.000491402	0.00086679	0.000424954	0.000312303	0.000188777	0.000326744	0.00060821	0.000425507	0.000480616	0.0148148	0.00129274	0.000348703	0.000281607	0.000454198	0.00110493	0.000203037	0.000352525	0.000134637	0.00812777	0.000692495	0.000759041	0.000193515	0.000147701	0.000131717	0.000109127	0.000700147	0.000363277
Escherichia_fergusonii	3.98e-05	6.75e-06	3.04e-06	1.46e-06	1e-05	1.33e-06	3.47e-06	2.14e-05	1.66e-06	1.34e-05	1.1e-06	1.43e-06	3.83e-06	0	0	1.8e-05	3.84e-05	2e-06	4.26e-05	3.83e-06	8.23e-07	2.03e-06	3.75e-06	2.88e-06	1.44e-05	1.69e-05	9.43e-06	3.78e-05	4.11e-06	1.89e-06	0.000156204	8.22e-06	1.57e-05	8.51e-06	4.39e-06	2.69e-05	9.79e-06	4.01e-06	6.88e-06	3.37e-05	4.06e-05	1.25e-06	1.21e-05	1.21e-05	1.39e-05	1.54e-06	7.17e-06	4.75e-06
Ethanoligenens_harbinense	0.00184518	0.00138295	0.00109403	0.000863718	0.00153769	0.00113927	0.00261028	0.00101491	0.0016979	0.00139962	0.00216173	0.00157786	0.000827478	0.00297621	0.000715058	0.0021373	0.00177909	0.00126417	0.0020458	0.0012367	0.000855198	0.00129094	0.00158744	0.000630993	0.00150878	0.0016193	0.00100798	0.00227694	0.00114433	0.000994931	0.0013541	0.00112244	0.00144921	0.00129793	0.00143581	0.00314838	0.000986745	0.00154332	0.00117019	0.00227539	0.00219488	0.00183691	0.00161234	0.00164618	0.00161384	0.000994185	0.00255154	0.00239326
[Eubacterium]_cylindroides	0.000855124	0.00202999	0.000969648	0.00128215	0.00201433	0.00269189	0.00149152	0.000791146	0.00107026	0.0015835	0.00128599	0.00120518	0.00070898	0.0058333	0.00135627	0.00104932	0.000688244	0.000976824	0.000987815	0.000777819	0.00333659	0.00132824	0.00262964	0.000917446	0.00101385	0.00160068	0.00109634	0.00144922	0.00112217	0.00124658	0.00127805	0.00313916	0.00224865	0.000863474	0.00273313	0.00256897	0.00107476	0.00134273	0.00313794	0.00238553	0.00155595	0.00374761	0.00192387	0.00581061	0.000712413	0.00187322	0.00360774	0.00125805
Eubacterium_eligens	0.00140814	0.00323238	0.00281395	0.00177424	0.0014052	0.00201076	0.0032459	0.00498246	0.00221146	0.00372633	0.00364816	0.0023937	0.0172441	0.00133874	0.00850809	0.0118355	0.00286432	0.00280749	0.00436832	0.00157315	0.00207973	0.00184559	0.000786224	0.00168201	0.00348828	0.000686567	0.00331475	0.00825208	0.00630126	0.00279582	0.00170275	0.00681495	0.00537656	0.00597306	0.0149799	0.00290011	0.00109155	0.00536795	0.00292325	0.00172267	0.00678969	0.00181301	0.0020011	0.00506018	0.024456	0.00066373	0.00207905	0.00112975
Eubacterium_limosum	0.000292941	0.000200616	0.000290613	0.00014815	0.000283873	0.00040309	0.000575717	0.000291663	0.000309878	0.00029896	0.000356699	0.000383392	0.000147302	0.000428347	0.000167688	0.000415481	0.000432308	0.00022196	0.000249509	0.000196519	0.000192492	0.000242052	0.000347325	0.000144391	0.000284279	0.000267709	0.000192135	0.00142125	0.000161814	0.000283141	0.000316632	0.00033952	0.000349488	0.00030515	0.000739364	0.00087022	0.000187931	0.000274844	0.000231237	0.000490241	0.000447416	0.000504018	0.000281161	0.000314667	0.000233544	0.000309834	0.000815706	0.000326213
Eubacterium_rectale	0.00630567	0.00569688	0.00748512	0.00270368	0.0104883	0.00396787	0.0129272	0.00523509	0.00648213	0.0201643	0.0131642	0.00929118	0.0342237	0.00730474	0.00811056	0.0358207	0.00593057	0.00629307	0.00970124	0.0073781	0.0104868	0.00471211	0.00312405	0.00562482	0.0154598	0.00267722	0.0097803	0.00528583	0.00842874	0.0124922	0.00825612	0.0211859	0.0369219	0.0206241	0.0152519	0.0136968	0.00497111	0.00414757	0.0238359	0.00670296	0.0312678	0.0107072	0.0059631	0.0523498	0.0189986	0.00407037	0.0125472	0.00862742
Eubacterium_siraeum	0.0158223	0.00566736	0.0419088	0.00536452	0.0107711	0.0173987	0.0305427	0.00826965	0.00820409	0.0140924	0.0079429	0.0142786	0.00300328	0.0160927	0.00721397	0.0300764	0.0229335	0.0116415	0.0708009	0.0558767	0.00805253	0.0186844	0.0115713	0.00537659	0.00831534	0.0202244	0.0141297	0.0428711	0.00463204	0.0699542	0.0124058	0.00590691	0.0186954	0.0233957	0.0714361	0.0202872	0.00971294	0.093741	0.00382658	0.0119012	0.0253226	0.0545503	0.0286752	0.0122089	0.0214859	0.0056198	0.079683	0.0512326
Exiguobacterium_antarcticum	2.46e-05	4.46e-06	1.39e-05	2.72e-06	7.78e-05	1.39e-05	3.27e-05	0	0	8.63e-06	1.82e-05	7.62e-06	4.56e-06	0.000104927	6.15e-06	2.29e-05	2.33e-05	3.12e-05	1.65e-05	1.97e-05	1.98e-05	1.64e-05	9.37e-06	5.23e-05	7.55e-06	1.06e-05	2.11e-06	2.52e-05	2.43e-06	1.95e-05	1.9e-05	7.39e-06	2.45e-06	8.33e-06	4.08e-06	6.61e-06	1.39e-05	6.3e-06	5.31e-06	4.65e-06	2.16e-05	8.11e-06	6.94e-06	1.19e-05	2.98e-06	7.69e-06	1.63e-05	2.54e-05
Exiguobacterium_sibiricum	5.06e-06	4.19e-06	8.13e-06	5.75e-06	3.33e-06	7.6e-06	1.39e-05	4.4e-06	1.08e-05	1.92e-06	1.55e-05	8.1e-06	5.1e-06	1.17e-05	9.23e-07	3.7e-05	1.08e-05	3.32e-05	8.66e-06	7.05e-06	8.65e-06	4.66e-06	1.41e-05	4.11e-06	6.72e-06	5.45e-06	4.76e-06	1.82e-05	8.68e-06	1.04e-05	5.63e-06	1.77e-05	6.19e-06	2.2e-05	1.76e-05	1.15e-05	6.92e-06	3.82e-07	5.55e-06	1.16e-06	3.25e-06	3.33e-06	4.92e-06	1.1e-06	8.31e-06	9.73e-06	1.64e-05	2.14e-06
Exiguobacterium_sp._AT1b	2.15e-05	1.7e-05	1.52e-05	1.11e-05	1.61e-05	2.46e-05	5.2e-05	2.17e-05	6.84e-05	2.06e-05	3.42e-05	7.38e-06	2.81e-05	6.6e-05	1.6e-05	5.66e-05	3.8e-05	1.26e-05	1.91e-05	1.35e-05	1.15e-05	1.99e-05	2.37e-05	3.01e-06	1.52e-05	2.5e-05	2.61e-05	1.33e-05	2.31e-05	2.46e-05	1.14e-05	1.42e-05	4.3e-05	1.82e-05	2.9e-05	7.68e-05	1.16e-05	1.41e-05	1.28e-05	3.05e-05	1.24e-05	1.66e-05	3.85e-05	1.03e-05	1.08e-05	4.75e-05	4.49e-05	1.85e-05
Faecalibacterium_prausnitzii	0.100781	0.195446	0.0519925	0.173805	0.125818	0.0662089	0.171963	0.135088	0.0489902	0.157122	0.242181	0.193454	0.195757	0.0927267	0.0639534	0.0564972	0.066727	0.0514119	0.206332	0.0301217	0.0406732	0.040105	0.113864	0.0228153	0.260442	0.263051	0.280686	0.35328	0.1978	0.0502851	0.132044	0.177318	0.258114	0.114935	0.156202	0.228772	0.0534647	0.11129	0.592275	0.0825418	0.10184	0.0950046	0.287942	0.404962	0.344055	0.0740809	0.109786	0.159142
Ferrimonas_balearica	5.18e-05	4.02e-05	2.22e-05	1.39e-05	6.22e-05	3.07e-05	5.49e-05	5.09e-05	7.22e-05	3.69e-05	5.58e-05	3.74e-05	1.77e-05	5.31e-05	2.03e-05	4.03e-05	3.16e-05	4.46e-05	3.97e-05	3.77e-05	2.33e-05	2.7e-05	2.62e-05	1.69e-05	3.89e-05	4.55e-05	2.02e-05	2.38e-05	3.47e-05	1.7e-05	2.96e-05	5.06e-05	3.8e-05	3.72e-05	6.82e-05	0.000115069	1.88e-05	1.82e-05	3.33e-05	5.35e-05	8.12e-05	3.82e-05	3.56e-05	3.45e-05	4.18e-05	3.47e-05	6.16e-05	6.46e-05
Ferroglobus_placidus	4.74e-06	1.65e-05	5.64e-06	1.47e-05	6.11e-06	8.49e-06	2.33e-05	1.4e-05	1.33e-05	7.67e-06	1.05e-05	1.88e-05	7.29e-07	1.79e-05	6.15e-06	2.07e-05	4.47e-05	1.08e-05	1.82e-05	1.43e-05	7.82e-06	1.97e-05	1.1e-05	1.66e-05	8.38e-06	3.29e-06	2.91e-06	1.96e-05	2.78e-06	1.39e-05	7.68e-06	2.88e-06	9.82e-06	3.71e-06	9.98e-06	2.2e-05	4.81e-06	8.97e-06	3.14e-06	1.16e-05	2.11e-05	1.18e-05	1.1e-05	4.77e-06	1.86e-05	6.66e-06	2.14e-05	2.35e-05
Ferroplasma_acidarmanus	0	1.46e-06	2.28e-06	0	0	3.74e-06	0	0	7.47e-06	5.03e-06	6.63e-06	4.05e-06	0	0	3.08e-06	3.27e-06	2.49e-06	8e-07	1.21e-06	1.81e-06	1.24e-06	1.22e-06	0	3.01e-06	1.24e-06	0	1.06e-06	0	3.12e-06	0	2.91e-06	0	1.77e-06	8.87e-06	7.77e-06	1.78e-05	1.86e-06	0	0	1.05e-05	3.25e-06	1.25e-06	3.47e-06	2.2e-06	6.2e-06	1.54e-06	2.83e-06	3.56e-06
Fervidicoccus_fontis	0	0	0	0	0	0	0	0	0	9.59e-07	0	0	0	3.7e-06	0	0	0	0	0	0	0	0	0	0	6.2e-07	0	0	0	0	2.52e-06	0	0	0	0	0	0	0	0	0	0	0	0	0	0	0	3.84e-07	0	0
Fervidobacterium_nodosum	0.000109656	8.19e-06	3.31e-05	1.85e-05	4.72e-05	3.21e-05	2.03e-05	1.92e-05	5.35e-05	6.23e-06	1.1e-05	7.86e-06	2.19e-06	6.3e-05	2e-05	2.56e-05	1.54e-05	2.68e-05	2.13e-05	6.04e-06	2.8e-05	1.91e-05	5.22e-05	1.19e-05	1.48e-05	7.86e-06	3.17e-06	0	1.01e-05	6.02e-05	1.18e-05	8.35e-06	1.74e-05	1.68e-05	2e-05	3.49e-05	5.91e-06	6.01e-06	3.14e-06	4.77e-05	3.35e-05	1.97e-05	4.05e-06	2.48e-05	9.8e-06	1.54e-05	6.01e-05	3.06e-05
Fervidobacterium_pennivorans	2.53e-06	1.26e-06	2.17e-06	1.46e-06	4.17e-06	5.13e-06	1.04e-05	1.59e-05	1.66e-06	1.05e-05	6.63e-06	7.86e-06	7.29e-07	2.47e-05	4.25e-05	5.5e-05	5.28e-05	9.8e-06	3.41e-05	4.43e-06	3.71e-06	2.53e-05	3.98e-06	1.37e-06	6.62e-06	5.45e-06	4.23e-06	0	2.95e-06	4.72e-06	3.43e-06	5.91e-06	8.35e-06	8.69e-06	6.36e-06	5.42e-06	2.45e-06	2.48e-06	7.25e-07	1.25e-05	2.54e-05	6.44e-06	1.74e-06	4.22e-06	1.98e-06	2.82e-06	7.05e-06	5.7e-06
Fibrella_aestuarina	0.000263869	3.44e-05	0.000249732	0.000143553	0.000149159	0.000313071	0.000419783	0.000223489	0.000631786	0.000203782	0.000426824	0.000156929	0.000260512	0.000761644	0.000172611	0.000129055	0.000221036	0.00016717	0.000134111	0.000219271	0.000110554	0.000120418	0.000234673	0.000106581	0.000109306	0.000124922	0.000201914	0.000139119	0.000269652	8.5e-05	0.000277458	0.000142664	9.83e-05	0.000183905	0.000215008	0.000684991	0.000117383	8.96e-05	7.47e-05	0.000161573	0.000285113	0.000224054	3.3e-05	0.000106602	0.000214443	0.000151651	0.000302894	0.000148495
Fibrobacter_succinogenes	0.000500244	0.000117495	0.000234225	0.000109179	0.000320816	0.000144436	0.000410873	0.000293587	0.000176303	0.000186041	0.000292096	0.000226225	0.000461958	0.000238245	0.000239071	0.000174252	0.000489852	0.000290548	0.000241712	0.000293972	0.000196609	0.000164206	0.000313599	0.000113842	0.000196689	0.000209809	0.000241116	0.000257266	0.000296669	0.000197789	0.000214859	0.000201387	0.000237149	0.000157917	0.000161159	0.00048129	0.000134092	0.000122248	0.000112539	0.000192958	0.000277539	0.000220729	0.000177895	0.0002099	0.000176987	0.000204934	0.000388572	0.00131317
Filifactor_alocis	0.000239536	0.00021356	0.000140752	0.000120254	0.000208877	0.000250356	0.000641556	0.000221015	0.000423956	0.000302796	0.000311974	0.000302427	0.000142197	0.000330827	0.000173226	0.000485182	0.00034111	0.000180168	0.000225598	0.000158665	0.000116318	0.000195831	0.000193921	0.000165625	0.000202997	9.21e-05	0.0001295	0.000369121	0.000205146	0.000331644	0.00014367	0.000179885	0.000258164	0.000197034	0.000296378	0.000544332	0.000142953	0.000154791	0.00017533	0.000169129	0.000526945	0.000282042	0.000234012	0.000199259	0.000226474	7.52e-05	0.000329314	0.000202903
Finegoldia_magna	0.000233532	3.85e-05	0.000160596	7.85e-05	0.000186656	0.000190301	0.000231178	0.000165212	0.000311122	0.000148161	0.000310869	0.000158834	4.07e-05	0.000485748	0.000217225	0.000477558	0.000653135	0.000150173	0.00025644	9.04e-05	0.000114054	0.00016968	0.00022952	0.000128226	0.000107652	6.18e-05	5.66e-05	0.000309698	6.02e-05	0.000174168	0.000173948	0.000156233	0.000160162	0.000125501	0.000147802	0.000466716	9.07e-05	0.000117286	3.79e-05	0.000115659	0.00045986	0.000206803	8.07e-05	0.000167333	0.000131841	0.000115916	0.000280751	0.000162513
Flavobacteriaceae_bacterium_3519-10	0.000262288	6.88e-05	0.00028454	5.04e-05	0.000197211	0.000230211	0.000191576	0.000199573	0.000712678	0.000293925	0.000474862	0.000169788	6.73e-05	0.000517226	7.26e-05	0.00027009	8.97e-05	0.000379932	0.000150399	0.000257327	0.000112407	0.000317465	0.000300718	0.000107677	0.000165459	1.72e-05	4.77e-05	9.58e-05	0.000195195	7.02e-05	0.000286894	8.79e-05	6.78e-05	0.000201562	0.000301686	0.000884116	0.000207003	4.76e-05	2.63e-05	0.000548651	0.000207748	0.000272066	0.000215788	0.000130637	0.000103067	7.7e-05	0.00031862	0.000274893
Flavobacterium_branchiophilum	7.17e-05	3.01e-05	4.63e-05	9.3e-06	5.44e-05	6.16e-05	0.000123757	5.33e-05	0.000114493	4.84e-05	0.000223627	3.88e-05	0.000284941	0.000141342	0.000122458	0.000136679	0.000126306	5.26e-05	4.7e-05	0.000123227	4.39e-05	3.2e-05	0.000149188	3.03e-05	4.81e-05	9.22e-05	0.000189228	3.29e-05	0.000102284	5.61e-05	7.45e-05	6.49e-05	3.37e-05	0.000106214	1.58e-05	0.000115577	1.14e-05	4.81e-05	1.59e-05	2.91e-05	6.06e-05	0.000119094	1.21e-05	8.99e-06	6.62e-05	0.00035556	7.11e-05	3.37e-05
Flavobacterium_columnare	1.99e-05	3.99e-06	8.02e-06	3.73e-05	8.86e-05	0.000163567	0.000151478	0.000114081	0.00023189	1.53e-05	2.98e-05	1.21e-05	3.99e-05	4.81e-05	5.14e-05	6.04e-05	2.33e-05	3.24e-05	2.39e-05	3.83e-05	1.44e-05	2.01e-05	6.93e-05	4.45e-05	1.21e-05	7.73e-06	3.96e-05	0	7.43e-05	1.73e-05	2.08e-05	2.75e-05	9.63e-05	2.51e-05	3.47e-05	2.12e-05	8.52e-06	7.06e-06	6.64e-06	2.06e-05	7.84e-05	1.85e-05	9.83e-06	1.34e-05	1.09e-05	9.22e-06	5.2e-05	1.5e-05
Flavobacterium_indicum	6.51e-05	1.21e-05	3.36e-05	3.74e-05	0.000138881	1.56e-05	0.00154449	8.8e-05	4.15e-06	3.09e-05	0.000119268	0.000428399	0.000150401	0.000132701	6.43e-05	5.28e-05	1.79e-05	2.44e-05	6.13e-05	4.31e-05	3.11e-05	3.32e-05	7.31e-05	2.36e-05	1.56e-05	6.46e-06	0.000144916	6.92e-05	7.19e-05	2.61e-05	0.000120151	2.77e-05	0.000130898	9.41e-05	0.000115395	9.07e-05	1.32e-05	1.12e-05	1.87e-05	0.000418754	6.44e-05	3.18e-05	4.34e-06	7.34e-06	0.000124027	1.88e-05	9.79e-05	4.16e-05
Flavobacterium_johnsoniae	4.39e-05	1.88e-05	3.68e-05	9.19e-06	3.36e-05	2.01e-05	0.000142568	4.1e-05	6.64e-05	1.85e-05	9.83e-05	3.29e-05	4.45e-05	4.75e-05	4.86e-05	0.000200389	0.000117789	4.66e-05	5.49e-05	4.91e-05	2.08e-05	4.87e-05	6.11e-05	4.14e-05	4.48e-05	5.09e-05	4.98e-05	8.18e-05	2.88e-05	5.7e-05	3.88e-05	1.85e-05	8.63e-05	3.91e-05	3.99e-05	0.000190652	2.39e-05	2.02e-05	1.93e-05	2.59e-05	6.33e-05	2.37e-05	4.83e-05	3.34e-05	9.54e-05	3.34e-05	0.000121157	4.02e-05
Flavobacterium_psychrophilum	2.18e-05	1.03e-06	1.31e-05	2.09e-06	2.64e-05	4.88e-06	3.07e-05	4.26e-05	1.66e-06	8.15e-06	4.42e-06	1.31e-05	2.3e-05	1.05e-05	1.51e-05	3.76e-05	2.64e-05	1.26e-05	5.89e-06	1.19e-05	2.88e-06	1.42e-05	2.11e-05	1.42e-05	1.16e-05	1.33e-05	1.44e-05	2.31e-05	4.92e-06	1.1e-05	8.03e-06	1.09e-05	2.82e-05	3.8e-06	8.19e-06	1.59e-05	4.56e-06	2.29e-06	7.25e-06	1.1e-05	7.57e-06	8.52e-06	3.47e-06	1.1e-06	1.05e-05	3.2e-06	2.26e-05	8.32e-06
Flexibacter_litoralis	0.000110288	5.64e-05	7.12e-05	7.79e-05	9.72e-05	0.000144816	0.0002688	0.000183355	0.000406118	0.000102131	0.000159024	7.55e-05	0.000122508	0.000257379	6.77e-05	0.000223804	0.000122151	4.2e-05	9.67e-05	4.99e-05	6.98e-05	3.2e-05	8.48e-05	4.08e-05	8.81e-05	5.12e-05	0.000107123	0.000129332	0.00010454	5.92e-05	0.000214366	7.3e-05	0.000133452	9.03e-05	0.000135465	0.000402487	4.36e-05	4.36e-05	0.000138259	9.53e-05	0.000135253	7.61e-05	0.00018368	0.000136509	0.000187157	6.51e-05	0.000104299	6.58e-05
Flexistipes_sinusarabici	4.58e-05	9.95e-06	1.49e-05	2.76e-05	1.75e-05	2.63e-05	2.03e-05	2.56e-05	1.37e-05	1.97e-05	1.88e-05	1.71e-05	2.84e-05	1.23e-05	8e-06	0.000127966	6.44e-05	2.2e-05	1.21e-05	5.24e-06	5.56e-06	1.05e-05	1.31e-05	1.11e-05	2.74e-05	2.62e-05	1.13e-05	6.99e-06	1.21e-05	1.1e-05	1.25e-05	3.06e-05	2.99e-05	1.87e-05	3.21e-05	2.29e-05	4.22e-06	6.39e-06	3.62e-06	1.74e-06	3.9e-05	1.16e-05	3.64e-05	3.49e-06	1.82e-05	9.48e-06	2.05e-05	2.09e-05
Fluviicola_taffensis	5.81e-05	1.15e-05	0.000122426	1.64e-05	9.58e-05	0.000122264	0.000166329	0.00011848	0.000212393	0.000104049	0.00032633	1.71e-05	3.12e-05	0.000404276	3.35e-05	0.000195488	9.7e-05	0.00011178	3.33e-05	9.36e-05	4.53e-05	0.0001042	0.000119444	2.96e-05	7.29e-05	1.57e-05	3.12e-05	1.82e-05	5.85e-05	2.43e-05	0.000149139	1.97e-05	3.03e-05	9.75e-05	4.22e-05	0.000390455	0.000199408	0.000142766	1.2e-05	3.6e-05	3.95e-05	6.07e-05	3.41e-05	3.16e-05	3.14e-05	2.06e-05	0.000110967	7.27e-05
Francisella_noatunensis	8.5e-05	2.2e-06	9.76e-06	4.18e-07	5.44e-05	7.73e-06	2.23e-05	4.95e-06	8.3e-06	1.8e-05	2.65e-05	3.29e-05	6.75e-06	6.36e-05	1.11e-05	2.5e-05	2.16e-05	3.12e-05	2.01e-05	8.66e-06	5.15e-06	2.29e-05	4.85e-05	4.93e-06	1.11e-05	4.56e-06	1.15e-05	9.79e-06	8.62e-06	3.06e-05	7.35e-05	2.17e-06	4.52e-06	2.35e-06	1.17e-05	1.71e-05	1.04e-05	3.24e-06	1.21e-06	5.81e-07	3.84e-05	9.35e-06	6.94e-06	8.44e-06	5.21e-06	1.36e-05	2.09e-05	7.77e-05
Francisella_novicida	6.35e-05	8.02e-06	1.4e-05	7.1e-06	3e-05	1.56e-05	5.05e-05	6.95e-05	7.51e-05	3e-05	1.6e-05	3.14e-05	7.95e-05	8.64e-06	6.65e-05	0.000112174	6.34e-05	2.96e-05	6.34e-05	3.77e-05	1.03e-05	2.05e-05	7.49e-05	2.77e-05	2.85e-05	3.91e-05	5.24e-05	1.89e-05	3.21e-05	1.2e-05	1.94e-05	2.37e-05	5.4e-05	3.44e-05	3.25e-05	3.2e-05	3.11e-05	1.78e-05	2.62e-05	1.19e-05	7.74e-05	1.91e-05	5.79e-06	3.32e-05	2.27e-05	1.37e-05	6.35e-05	2.47e-05
Francisella_philomiragia	0	2.33e-07	3.69e-06	3.34e-06	2.53e-05	2.28e-06	2.18e-05	3.57e-06	0	3.6e-06	6.63e-06	2.86e-06	7.29e-07	8.39e-05	6.15e-07	2.34e-05	6.44e-06	1.86e-05	1.32e-05	9.66e-06	1.65e-06	1.42e-05	3.51e-06	2.97e-05	3.62e-06	3.67e-06	1.23e-06	9.09e-06	2.89e-06	2.61e-05	4.65e-06	3.42e-06	9.72e-06	0	1.42e-05	1.53e-06	5.06e-06	1.72e-06	0	2.32e-06	1.89e-05	4.57e-06	0	4.4e-06	7.44e-07	4.48e-06	1.44e-05	2.85e-06
Francisella_sp._TX077308	2.84e-05	6.99e-07	6.72e-06	1.88e-06	7.78e-06	3.86e-06	3.81e-05	3.3e-06	4.02e-05	8.63e-06	1.66e-06	1.19e-05	3.65e-07	9.88e-06	7.69e-06	1.52e-05	2.68e-05	1.12e-05	5.89e-06	8.26e-06	3.09e-06	9.53e-06	1.19e-05	4.11e-06	1.15e-05	1.14e-06	5.55e-06	0	1.39e-06	5.98e-06	1.51e-05	3.72e-06	8.45e-06	1.35e-05	2.18e-05	3.39e-06	6.58e-06	1.43e-06	2.17e-06	5.23e-06	4.17e-05	6.24e-06	4.63e-06	2.02e-06	1.12e-06	8.07e-06	1.18e-05	1.52e-05
Francisella_tularensis	9.48e-06	0	5.64e-06	1.25e-06	0	3.1e-06	4.11e-05	8.8e-06	0	0	3.75e-05	9.53e-07	0	7.41e-06	1.85e-06	4.36e-06	1.66e-06	0	6.06e-06	2.01e-06	5.56e-06	0	4.45e-06	0	1.65e-06	2.53e-07	0	1.4e-06	1.16e-07	0	1.36e-06	7.31e-07	3.14e-06	2.17e-06	6.54e-06	4.59e-05	0	0	7.25e-07	1.74e-06	2.16e-06	4.16e-07	1.16e-06	6.97e-06	2.48e-07	0	1.4e-05	0
Frankia_alni	0.000103967	8.55e-05	4.78e-05	1.17e-05	5.64e-05	4.85e-05	7.77e-05	8.8e-05	0.00010993	9.52e-05	7.84e-05	5.95e-05	3.55e-05	8.21e-05	2.31e-05	4.52e-05	4.18e-05	0.000162771	5.93e-05	6.38e-05	4.39e-05	5.01e-05	7.1e-05	8.49e-06	4.42e-05	7.36e-05	5.42e-05	4.61e-05	7.65e-05	3.4e-05	4.72e-05	8.36e-05	6.65e-05	7.18e-05	7.78e-05	0.000142353	2.26e-05	3.09e-05	9.9e-06	8.69e-05	7.79e-05	4.45e-05	9.26e-05	4.37e-05	6.26e-05	8.53e-05	9.73e-05	0.00012331
Frankia_sp._CcI3	0.000121348	3.49e-05	0.000211562	7.17e-05	0.00016388	9.5e-05	0.000169299	0.000118205	8.17e-05	4.75e-05	0.000135833	4.43e-05	6.25e-05	0.000270958	1.54e-05	3.1e-05	1.81e-05	9.98e-05	0.000165993	4.83e-05	7.62e-05	4.34e-05	0.000134199	2.69e-05	1.96e-05	4.71e-05	3.48e-05	3.85e-05	0.000192997	0.000133539	8.1e-05	7.54e-05	5.27e-05	0.000208806	6.39e-05	0.000169299	5.46e-05	3.86e-05	6.04e-06	0.00027636	0.000122269	0.000210544	3.88e-05	0.000153022	5.88e-05	8.62e-05	0.000442231	5.96e-05
Frankia_sp._EAN1pec	9.04e-05	8.01e-05	4.67e-05	1.67e-05	7.83e-05	6.9e-05	0.000164349	0.000105559	0.000310708	0.000111481	0.000126446	7.93e-05	5.63e-05	0.000225284	3.57e-05	5.77e-05	5.44e-05	4.96e-05	6.13e-05	4.35e-05	4.08e-05	4.44e-05	4.22e-05	2.14e-05	6.34e-05	7.72e-05	4.65e-05	4.82e-05	0.000101127	6.39e-05	6.5e-05	0.000111476	5.8e-05	9.21e-05	0.000198066	0.000297586	2.58e-05	5.39e-05	1.4e-05	0.000112171	7.41e-05	7.19e-05	6.86e-05	3.34e-05	0.000101082	0.000102211	8.22e-05	9.1e-05
Frankia_sp._EuI1c	9.64e-05	9.75e-05	6.27e-05	1.57e-05	6.17e-05	5.97e-05	6.98e-05	0.000127276	0.000192896	8.7e-05	0.000106568	8.45e-05	4.87e-05	8.21e-05	2.98e-05	3.65e-05	3.53e-05	0.000118779	6.06e-05	8.8e-05	4.84e-05	6.69e-05	0.000101879	1.86e-05	8.82e-05	7.17e-05	8.88e-05	8.74e-05	0.000114086	5.48e-05	4.04e-05	8.96e-05	7.29e-05	9.06e-05	0.000120562	0.000201837	1.96e-05	4.7e-05	8.81e-06	9.82e-05	6.11e-05	6.26e-05	9.57e-05	2.97e-05	7.8e-05	0.000129621	0.00011298	0.000127349
Frankia_symbiont_of_Datisca_glomerata	0.000138096	0.000102221	4.97e-05	5.15e-05	5.92e-05	6.14e-05	9.26e-05	0.000162738	0.000143531	0.000103569	9.17e-05	7.36e-05	5.14e-05	0.000202447	4.98e-05	4.47e-05	1.66e-05	0.000121978	2.67e-05	7.03e-05	7.14e-05	7.95e-05	5.97e-05	2.07e-05	7.68e-05	0.000105411	4.18e-05	7.27e-05	0.000143128	0.000102359	4.3e-05	0.000100996	6.37e-05	9.62e-05	8.34e-05	8.05e-05	1.92e-05	3.08e-05	4.23e-06	0.000105488	3.19e-05	8.11e-05	9.05e-05	3.71e-05	7.28e-05	0.000101955	8.43e-05	0.000100976
Frateuria_aurantia	0.000109972	3.59e-05	5.93e-05	6.87e-05	0.000123604	5.66e-05	0.000233158	6.3e-05	7.88e-05	4.99e-05	0.000149085	9.03e-05	2.44e-05	0.000252441	4.31e-05	0.000132322	0.000120489	0.000171369	0.000132205	0.000113159	4.34e-05	6.04e-05	0.000102581	8.88e-05	9.78e-05	7.5e-05	3.97e-05	3.78e-05	6.62e-05	6.52e-05	5.61e-05	3.91e-05	7.59e-05	4.93e-05	6.75e-05	0.000154894	5.53e-05	9.33e-05	3.1e-05	0.00013106	0.000177993	0.000133851	6.36e-05	6.28e-05	9.33e-05	9.56e-05	0.000213755	0.000183421
Fusobacterium_nucleatum	0.000357408	0.000101356	0.000164283	0.000130388	0.000176657	0.00037642	0.000192071	0.000277369	0.000716826	0.000348827	0.000202093	0.000116446	4.01e-05	0.000417238	0.000181534	0.00113481	0.000511664	0.000190566	0.000203419	8.96e-05	0.000145758	0.00035355	0.000402129	0.000117678	0.000152843	0.000111999	5.77e-05	0.000267053	7.78e-05	0.000267709	0.000168597	9.43e-05	0.000286052	4.5e-05	0.00032281	0.000232002	0.000113333	9.07e-05	1.59e-05	0.000255727	0.00041171	0.000225717	0.00014463	0.000115959	8.76e-05	9.94e-05	0.000294338	0.000152534
Gallibacterium_anatis	8.28e-05	4.89e-06	1.3e-05	3.93e-05	5.42e-05	2.29e-05	7.92e-06	2.2e-06	5.81e-06	2.37e-05	0	1.93e-05	3.65e-06	2.35e-05	1.35e-05	0.000108363	3.57e-05	2.14e-05	1.75e-05	2.66e-05	7.41e-06	2.15e-05	2.53e-05	3.08e-05	3.84e-05	5.97e-05	9.58e-05	3.01e-05	1e-05	1.86e-05	5.41e-05	9.08e-06	2.11e-05	1.22e-05	1.04e-05	4.12e-05	4.98e-05	6.68e-06	2.66e-06	6.39e-06	0.00010171	2.83e-05	7.52e-06	3.12e-05	1.09e-05	1.17e-05	2.2e-05	2.52e-05
Gallionella_capsiferriformans	4.9e-05	1.01e-05	1.87e-05	1.07e-05	3.53e-05	1.27e-05	5.94e-05	5.75e-05	0	9.59e-06	1.44e-05	1.86e-05	5.32e-05	7.22e-05	0.000108305	6.75e-05	2.66e-05	2.78e-05	1.61e-05	2.34e-05	2.04e-05	3.04e-05	7.31e-05	1.12e-05	3.85e-05	1.84e-05	3.66e-05	1.26e-05	3.22e-05	2.11e-05	4.51e-05	2.28e-05	5.4e-06	1.65e-05	1.99e-05	4.37e-05	7e-06	1.94e-05	1.5e-05	3.57e-05	4.17e-05	2.43e-05	1.45e-05	8.81e-06	1.91e-05	1.99e-05	5.27e-05	1.21e-05
gamma_proteobacterium_HdN1	3.7e-05	8.02e-06	1.52e-05	1.97e-05	3.94e-05	3.59e-05	6.83e-05	3.13e-05	8.34e-05	5.27e-06	1.33e-05	1.55e-05	6.02e-06	2.04e-05	7.14e-05	2.12e-05	6.56e-05	2.4e-05	2.67e-05	4.17e-05	3.58e-05	1.8e-05	3.4e-05	3.3e-05	3.16e-05	1.48e-05	1.1e-05	7.34e-05	1.5e-05	4.91e-05	2.63e-05	2.25e-05	1.84e-05	1.33e-05	3.21e-05	6.76e-05	1.43e-05	1.99e-05	1.47e-05	1.89e-05	7.9e-05	2e-05	1.24e-05	1.19e-05	2.94e-05	4.48e-06	3.22e-05	4.23e-05
Gardnerella_vaginalis	0.000408917	0.000609901	0.000209827	2.74e-05	0.000264708	0.000290899	0.000214347	0.00110755	0.00127975	0.00071923	0.000407498	0.00047412	0.00029278	0.00017961	0.000108613	0.000168806	7.94e-05	0.000707473	5.41e-05	0.000414984	0.00030634	0.000248742	0.000142865	5.32e-05	0.000350773	0.000512359	0.000605917	0.000397783	0.000643554	0.000373847	0.000152073	0.000494876	0.000326117	0.000606859	0.000656482	0.000314025	1.94e-05	9.34e-05	1.14e-05	0.000335061	0.000220192	0.000154011	0.000522693	0.000111555	0.000384237	0.00120527	0.000165884	0.000699232
Geitlerinema_sp._PCC_7407	9.8e-05	3.69e-05	6.4e-05	4.66e-05	7.33e-05	9.01e-05	0.000125737	9.37e-05	4.65e-05	8.34e-05	8.28e-05	9.14e-05	4.43e-05	0.000114185	4.92e-05	7.19e-05	8.7e-05	0.0001	9.72e-05	6.81e-05	7.12e-05	0.000102781	0.000144972	4.6e-05	7.28e-05	9.1e-05	7.07e-05	9.23e-05	0.00012016	5.7e-05	6.58e-05	6.34e-05	0.00010684	6.28e-05	0.000107065	0.000215394	5.73e-05	7.4e-05	3.05e-05	8.66e-05	9.9e-05	9.66e-05	4.74e-05	4.7e-05	8.74e-05	9.63e-05	0.000168086	0.000110005
Gemmatimonas_aurantiaca	0.000222787	3.88e-05	0.000303083	0.000113254	0.000179157	0.000125558	0.00175438	0.000139921	0.000114078	7.96e-05	0.000503575	9.31e-05	2.81e-05	0.000541298	0.000107689	0.000148658	8.35e-05	0.000244956	8.7e-05	0.000118394	0.000256312	7.46e-05	0.000182679	4.44e-05	4.87e-05	6.9e-05	8.94e-05	0.000116049	0.000131326	0.000382981	0.000736892	6.33e-05	0.00012481	7.5e-05	9.37e-05	0.000295722	4.75e-05	3.19e-05	2.81e-05	0.000239163	8.76e-05	0.000106415	6.33e-05	0.000135408	0.000167685	0.000115275	0.000235961	0.000594454
Geobacillus_kaustophilus	6.32e-07	8.65e-07	0	0	0	1.27e-07	0	0	0	9.59e-07	2.21e-06	0	0	0	0	0	2.49e-06	2.4e-06	6.93e-07	0	0	1.22e-06	4.68e-07	0	4.14e-07	1.77e-06	5.29e-07	0	0	1.26e-06	4.93e-07	1.23e-06	1.47e-06	5.43e-07	8.79e-07	6.78e-07	8.44e-07	5.73e-07	0	0	9.74e-06	8.31e-07	0	0	0	1.28e-06	3.52e-06	2.85e-06
Geobacillus_sp._C56-T3	1.39e-05	6.75e-06	7.27e-06	3.87e-06	1.53e-05	1.06e-05	3.91e-05	1.57e-05	2.12e-05	2.06e-05	3.59e-05	1.52e-05	2.92e-06	2.53e-05	9.54e-06	2.01e-05	1.18e-05	9.6e-06	1e-05	1.91e-05	9.47e-06	1.01e-05	2.04e-05	6.58e-06	3.52e-06	1.61e-05	1.1e-05	3.5e-06	1.26e-05	2.08e-05	1.26e-05	1.64e-05	6.78e-06	2.4e-05	1.67e-05	4.22e-05	1.22e-05	2.29e-06	2.66e-06	3.08e-05	1.73e-05	1.08e-05	1.5e-05	1.05e-05	1.35e-05	2.5e-05	2.55e-05	2.16e-05
Geobacillus_sp._GHH01	2.53e-06	3.79e-06	2.17e-07	8.15e-06	1.67e-06	7.79e-06	0	1.02e-05	0	3.84e-06	0	9.53e-07	0	0	0	8.71e-06	0	0	6.93e-07	8.05e-07	0	7.1e-06	5.15e-06	2.88e-06	0	6.97e-06	1.76e-07	0	5.67e-06	0	1.81e-06	4.86e-06	2.95e-06	2.63e-06	2.78e-06	1.36e-06	1.01e-06	0	1.21e-06	1.16e-06	0	6.24e-06	0	0	5.58e-06	4.48e-06	3.4e-06	3.56e-06
Geobacillus_sp._JF8	2.18e-05	2.4e-05	2.19e-05	1.43e-05	6.08e-05	2.66e-05	4.01e-05	3.35e-05	3.98e-05	4.17e-05	6.18e-05	3.48e-05	2.19e-05	6.6e-05	2.06e-05	1.47e-05	2.76e-05	4.32e-05	6.41e-06	3.87e-05	3.05e-05	2.96e-05	2.01e-05	1.37e-05	3.37e-05	2.07e-05	3.28e-05	1.33e-05	4.8e-05	2.93e-05	2.81e-05	3.67e-05	3.58e-05	4.18e-05	3.05e-05	0.000103206	1.82e-05	2.28e-05	9.54e-06	2.15e-05	0.000162844	2.18e-05	2e-05	1.65e-05	2.8e-05	4.69e-05	6.49e-05	4.25e-05
Geobacillus_sp._WCH70	4.83e-05	7.52e-06	3.85e-05	1.55e-05	3.28e-05	2.95e-05	4.26e-05	4.23e-05	4.31e-05	6.71e-06	1.71e-05	9.29e-06	1.79e-05	1.42e-05	2.31e-05	1.09e-05	3.51e-05	1.64e-05	1.13e-05	1.25e-05	1.71e-05	8.72e-06	2.22e-05	2.25e-05	1.55e-06	2.83e-05	2.17e-05	6.85e-05	3.81e-05	2.8e-05	1.6e-05	2.87e-05	4.32e-05	2.08e-05	2.75e-05	3.63e-05	6.41e-06	4.77e-06	3.74e-06	7.26e-06	1.51e-05	1.75e-05	2.02e-06	2.39e-06	1.14e-05	2.16e-05	2.38e-05	1.69e-05
Geobacillus_sp._Y4.1MC1	0	1.33e-07	0	0	0	1.9e-07	4.46e-06	0	0	0	0	0	3.83e-06	0	0	1.63e-05	8.52e-06	0	0	0	1.65e-06	0	0	0	0	4.18e-06	3.52e-07	8.39e-06	4.63e-07	0	2.35e-07	1.82e-06	3.14e-06	1.45e-06	5.62e-07	1.53e-06	0	0	0	5.81e-07	1.19e-05	4.16e-07	0	7.34e-07	8.68e-07	0	0	0
Geobacillus_thermodenitrificans	2.78e-05	1.13e-05	1.42e-05	2.4e-05	9.72e-06	7.67e-06	3.32e-05	4.95e-06	3.32e-06	1.25e-05	7.18e-06	1.1e-05	9.3e-06	3.7e-06	2.15e-06	7.62e-06	2.1e-05	7.4e-06	9.01e-06	4.23e-06	8.44e-06	3.65e-06	4.22e-06	1.04e-05	1.73e-05	5.95e-06	3.26e-06	8.39e-06	8.62e-06	2.52e-06	9.98e-06	8.1e-06	1.66e-05	7.06e-06	1.39e-05	8.64e-06	5.49e-06	1.15e-05	8.81e-06	7.56e-06	3.46e-05	6.44e-06	3.47e-06	1.03e-05	5.83e-06	8.33e-06	2.84e-05	5.23e-06
Geobacillus_thermoglucosidasius	0	2e-07	0	0	0	2.03e-06	3.96e-06	4.4e-06	0	4.79e-07	1.1e-06	1.43e-06	0	0	5.85e-06	0	0	6e-07	0	4.03e-07	0	0	9.37e-07	0	2.17e-06	3.29e-06	7.05e-07	1.12e-05	1.16e-07	1.89e-06	2.82e-07	1.29e-06	4.71e-06	0	3.51e-07	4.75e-06	0	3.15e-06	0	0	0	1.25e-06	0	0	6.2e-06	0	1.32e-06	2.14e-06
Geobacillus_thermoleovorans	0	2.99e-07	0	0	0	1.14e-06	2.33e-05	4.12e-06	2.49e-06	2.88e-06	0	0	0	0	0	0	0	0	0	5.64e-06	1.24e-06	4.05e-07	5.86e-06	0	1.76e-06	0	0	0	2.31e-07	1.26e-06	1.06e-06	1.5e-06	5.89e-07	1.81e-07	2e-06	0	3.46e-06	3.82e-07	0	0	2.16e-06	0	0	0	4.96e-07	1.41e-06	5.6e-06	0
Geobacter_bemidjiensis	0.000156109	3.73e-05	6.74e-05	3.66e-05	0.000119716	4.39e-05	0.000192566	5.75e-05	0.000123619	5.39e-05	0.000120924	6.41e-05	1.68e-05	0.000138873	6.65e-05	5.5e-05	6.96e-05	0.000157572	7.29e-05	5.56e-05	6.03e-05	8.58e-05	9.58e-05	3.11e-05	5.05e-05	4.7e-05	1.78e-05	6.71e-05	7.25e-05	9.95e-05	7.25e-05	5.73e-05	5.03e-05	4.06e-05	7.34e-05	0.000144217	4.42e-05	3.69e-05	1.61e-05	8.66e-05	0.000123351	9.37e-05	5.81e-05	2.86e-05	4.8e-05	4.87e-05	0.000139904	8.55e-05
Geobacter_daltonii	4.96e-05	4.19e-05	2.87e-05	2.12e-05	8.31e-05	5.11e-05	0.000215337	5.31e-05	0.000216541	5.54e-05	0.000109881	5.31e-05	4.1e-05	9.07e-05	4.31e-05	2.67e-05	3.22e-05	4.14e-05	3.45e-05	5.46e-05	5.33e-05	3.47e-05	6.39e-05	2.4e-05	4.98e-05	5.38e-05	2.94e-05	0.000148907	4.29e-05	0.000128815	5.88e-05	6.19e-05	6.16e-05	3.75e-05	8.37e-05	0.000145912	2.83e-05	9.14e-05	2.52e-05	5.29e-05	0.000166632	8.15e-05	8.21e-05	4.42e-05	8.66e-05	4.69e-05	9.15e-05	6.68e-05
Geobacter_lovleyi	5.09e-05	5.27e-05	4.64e-05	4.1e-05	7.67e-05	5.14e-05	0.000312362	4.26e-05	0.000145605	6.57e-05	0.000115955	4.17e-05	2.84e-05	0.000143194	2.34e-05	7.62e-05	6.23e-05	4.92e-05	5.51e-05	3.14e-05	4.16e-05	4.76e-05	7e-05	2.08e-05	4.35e-05	7.67e-05	3.47e-05	6.85e-05	5.98e-05	3.75e-05	6.19e-05	5.25e-05	6.8e-05	7.34e-05	7.96e-05	0.000163198	3.11e-05	6.02e-05	3.62e-05	9.59e-05	0.000129843	7.73e-05	8.82e-05	6.94e-05	7.43e-05	4.03e-05	0.000122038	7.67e-05
Geobacter_metallireducens	0.00029863	9.61e-05	0.000133595	5.31e-05	0.000172491	0.000110734	0.000383151	0.000117655	0.000301581	0.000127064	0.000234118	0.000129544	0.000192513	0.000327741	0.000144919	0.000141035	0.000228099	0.000195765	0.000132725	0.000106313	9.16e-05	0.00012954	0.000189705	7.53e-05	9.69e-05	0.000123402	0.000150026	0.000185958	0.000214981	0.000113383	0.000182985	0.000115672	0.00013188	0.00011382	0.000126045	0.000404182	9.63e-05	0.000197926	0.000126305	0.000157795	0.000168255	0.000165858	0.000108183	0.000117977	0.000181204	0.000105925	0.00024653	0.000263726
Geobacter_sp._M18	0.000309058	0.000142584	0.000147258	7.85e-05	0.000224988	0.000179088	0.000480672	0.000170984	0.000334353	0.00023351	0.000260622	0.000200745	0.000122508	0.000451184	0.000119074	0.000253754	0.000167439	0.00027575	0.000159236	0.000186652	0.000157699	0.000183059	0.000276595	7.27e-05	0.000141054	0.000235908	0.000162271	0.000213223	0.000204394	0.000117162	0.000184487	0.000142434	0.000142093	0.000212066	0.000239542	0.000597545	0.000120506	0.000223406	5.08e-05	0.000311522	0.000267801	0.00026874	0.000165457	0.000137243	0.000166569	0.000223762	0.000379199	0.000236166
Geobacter_sp._M21	0.00013778	5.85e-05	9.78e-05	7.04e-05	0.000184712	0.000103069	0.000108411	8.27e-05	0.000159295	6.47e-05	0.000156263	6.74e-05	9.21e-05	0.000278981	5.29e-05	4.9e-05	6.34e-05	0.000124378	7.29e-05	8.32e-05	7.91e-05	8.21e-05	0.000172374	3.64e-05	5.67e-05	8.96e-05	0.000100428	9.02e-05	0.000130863	4.94e-05	6.74e-05	9.33e-05	6.35e-05	0.000105308	0.000131458	0.000275386	6.25e-05	8.38e-05	5.59e-05	9.74e-05	0.000121187	0.000105792	7.98e-05	7.8e-05	6.95e-05	7.85e-05	0.000155819	0.000118083
Geobacter_sulfurreducens	0.000192766	6.47e-05	6.65e-05	6.41e-05	0.000104716	8.13e-05	9.75e-05	9.26e-05	0.000144361	7.7e-05	0.000159024	3.88e-05	6.02e-05	7.72e-05	4.03e-05	9.15e-05	7.73e-05	0.00011038	0.000114705	6.79e-05	5.39e-05	5.86e-05	9.79e-05	2.75e-05	3.82e-05	8.34e-05	6.31e-05	7.34e-05	6.17e-05	4.19e-05	5.51e-05	6.38e-05	5.49e-05	5.94e-05	0.000114481	0.000171671	3.28e-05	5.95e-05	2.17e-05	0.000117983	0.000140122	5.84e-05	5.93e-05	3.82e-05	4.66e-05	6.47e-05	0.000138897	7.94e-05
Geobacter_uraniireducens	0.000116924	7.59e-05	6.82e-05	4.67e-05	0.000102772	7.2e-05	0.00017623	9.87e-05	0.000136894	8.53e-05	0.000554374	7.48e-05	3.26e-05	0.00076905	0.000118151	0.000129055	8.08e-05	0.00011258	0.000104829	8.6e-05	7.16e-05	0.000144542	0.000132794	2.79e-05	8.02e-05	7.8e-05	5.63e-05	8.53e-05	6.14e-05	5.8e-05	0.000144796	8.51e-05	7.61e-05	0.000122241	0.000155746	0.000300467	7.08e-05	0.000113755	2.57e-05	0.000214172	0.000154729	0.000117847	0.00010182	4.48e-05	6.02e-05	0.000132695	0.000192808	0.000124736
Geodermatophilus_obscurus	5.37e-05	9.27e-05	6.22e-05	3.24e-05	6.94e-05	8.06e-05	7.82e-05	0.000150092	0.000120715	0.000103809	0.000114298	8.86e-05	5.43e-05	6.79e-05	1.51e-05	9.58e-05	0.00172175	0.000106181	2.84e-05	0.000105911	5.72e-05	4.48e-05	0.000106095	3.07e-05	5.18e-05	0.000109592	5.28e-05	0.000167782	0.000152095	6.49e-05	6.21e-05	9.02e-05	6.44e-05	9.97e-05	0.000173637	0.000178281	1.81e-05	4.24e-05	3.27e-05	6.19e-05	3.9e-05	4.74e-05	8.88e-05	3.49e-05	5.52e-05	9.85e-05	0.000125624	0.000131626
Glaciecola_nitratireducens	3.1e-05	6.39e-06	2.42e-05	6.83e-05	5.94e-05	1.18e-05	5e-05	1.79e-05	0	1.92e-06	3.31e-06	9.53e-07	4.19e-06	6.17e-06	3.42e-05	3.65e-05	2.12e-05	4e-05	2.11e-05	1.39e-05	4.14e-05	1.01e-05	6.14e-05	5.62e-06	4.18e-05	1.52e-06	8.81e-07	2.31e-05	8.68e-07	2.36e-05	1.58e-05	1.36e-05	5.6e-06	9.96e-06	1.72e-05	4.58e-06	9.11e-06	8.59e-06	1.93e-06	1.48e-05	4.22e-05	2.12e-05	1.01e-05	1.52e-05	2.48e-07	0	2.7e-05	1.71e-05
Glaciecola_psychrophila	3.98e-05	1.13e-06	1.45e-05	1.51e-05	2.81e-05	2.3e-05	4.16e-05	1.68e-05	3.61e-05	1.01e-05	1.82e-05	2.14e-06	6.2e-06	4.51e-05	1.35e-05	6.97e-05	1.18e-05	3.6e-06	1.7e-05	1.81e-05	2.06e-06	1.42e-06	2.51e-05	1.52e-05	1.93e-05	1.81e-05	1.14e-05	6.99e-06	2.18e-05	3.68e-05	2.15e-05	5.43e-06	1.05e-05	1.28e-05	1.2e-05	1.88e-05	5.74e-06	3.72e-06	2.66e-06	1.25e-05	2.16e-05	1.52e-05	4.74e-05	7.34e-06	1.23e-05	7.81e-06	1.67e-05	3.56e-06
Glaciecola_sp._4H-3-7+YE-5	4.87e-05	1.36e-06	4.23e-06	1.25e-06	4.72e-06	3.86e-06	1.49e-05	1.37e-06	4.15e-06	3.12e-06	3.87e-06	2.14e-06	8.39e-06	3.7e-06	6.52e-05	1.74e-05	2.26e-05	6.6e-06	2.6e-05	7.85e-06	3.09e-06	0	1.57e-05	3.42e-06	8.27e-06	5.7e-06	1.16e-05	2.8e-06	4.57e-06	1.76e-05	2.98e-06	9.71e-06	4.32e-06	3.26e-06	2.04e-06	5.59e-06	5.23e-06	4.2e-06	3.86e-06	2.32e-06	7.57e-06	8.31e-07	5.79e-07	2.57e-06	1.13e-05	1.54e-06	2.03e-05	8.32e-06
Gloeobacter_violaceus	0.000147261	7.48e-05	6.94e-05	0.000113463	0.0001986	0.000101232	0.000232168	9.87e-05	9.83e-05	7.22e-05	7.95e-05	7.91e-05	3.79e-05	0.00025923	3.35e-05	0.000221626	0.000100131	4.9e-05	0.000135497	7.85e-05	6.07e-05	5.6e-05	0.000146612	2.53e-05	0.000122026	0.000107312	4.59e-05	0.000177569	0.000106738	7.18e-05	0.000120456	6.98e-05	0.000133943	6.75e-05	0.000135008	0.00023895	5.01e-05	0.000104593	4.25e-05	0.000161573	0.000355985	0.000115353	0.000103555	7.25e-05	0.000137174	9.39e-05	0.000199539	0.00015586
Gloeocapsa_sp._PCC_7428	1.9e-06	3.03e-06	5.31e-06	5.96e-06	5e-06	1.13e-05	0	2.97e-05	1.58e-05	4.79e-06	1.1e-05	5.72e-06	2.92e-06	6.17e-06	4.31e-06	9.26e-06	4.36e-06	5.4e-06	1.09e-05	1.17e-05	8.23e-07	3.45e-06	3.75e-06	0	2.59e-06	4.43e-06	3.52e-07	2.94e-05	4.74e-06	2.14e-05	5.26e-06	3.82e-06	1.58e-05	2.54e-06	4.25e-06	1.69e-05	3.29e-06	3.34e-06	8.45e-07	0	1.84e-05	1.08e-05	3.18e-06	5.5e-06	1.2e-05	7.69e-07	4.07e-05	6.18e-06
Gluconacetobacter_diazotrophicus	0.000222471	4.3e-05	8.13e-05	0.000141672	0.000212488	7.07e-05	0.000306917	0.000103085	5.93e-05	5.51e-05	0.000200988	4.41e-05	5.25e-05	0.000219729	5.6e-05	3.49e-05	3.91e-05	0.000339139	8.11e-05	8.38e-05	9.28e-05	6.99e-05	0.000262777	2.12e-05	0.000103515	7.63e-05	4.85e-05	4.4e-05	7.45e-05	5.29e-05	9.66e-05	8.72e-05	0.000131586	3.6e-05	5.48e-05	0.000138795	3.94e-05	6.89e-05	6.88e-06	8.37e-05	6.33e-05	0.000108078	4.14e-05	5.78e-05	8.05e-05	6.84e-05	0.000220612	0.000140179
Gluconacetobacter_xylinus	7.02e-05	3.62e-05	2.92e-05	2.96e-05	4.36e-05	4.86e-05	5.89e-05	4.23e-05	4.31e-05	5.59e-05	6.57e-05	3.74e-05	4.12e-05	0.00012406	1.45e-05	4.14e-05	3.22e-05	4.02e-05	3.73e-05	1.65e-05	1.4e-05	2.82e-05	7.14e-05	2.32e-05	3.27e-05	4.09e-05	3.02e-05	3.43e-05	3.26e-05	1.95e-05	2.99e-05	4.06e-05	5.73e-05	2.95e-05	5.98e-05	9.2e-05	1.16e-05	3.45e-05	2.09e-05	4.74e-05	4.6e-05	1.64e-05	3.85e-05	4.18e-05	4.59e-05	2.37e-05	7.39e-05	6.18e-05
Gluconobacter_oxydans	0.000159901	4.83e-05	7.38e-05	8.38e-05	0.000164991	0.000109911	0.00036236	7.17e-05	0.000445527	6.19e-05	0.000229701	5.55e-05	4.92e-05	0.000351813	6.8e-05	0.000216725	6.42e-05	0.00010838	8.91e-05	9.06e-05	6.42e-05	7.54e-05	0.000138649	3.01e-05	8.1e-05	9.98e-05	5.82e-05	3.98e-05	0.000123921	4.28e-05	8.9e-05	8.41e-05	0.000147298	7.01e-05	0.000144815	0.000221326	6.55e-05	6.02e-05	2.5e-05	0.000122342	0.000114153	7.48e-05	0.000159093	5.34e-05	0.000185669	9.15e-05	0.000224638	0.000109054
Gordonia_bronchialis	5.4e-05	6.56e-05	3.26e-05	1.39e-05	4.64e-05	4.28e-05	8.27e-05	0.000112432	0.000112834	9.09e-05	0.00010712	5.81e-05	3.97e-05	6.17e-06	2.25e-05	4.36e-06	1.54e-05	6.9e-05	1.07e-05	5.13e-05	7.1e-05	3.61e-05	3e-05	1.37e-05	6.2e-05	7.93e-05	4.33e-05	7.48e-05	9.81e-05	4.28e-05	2.52e-05	8.52e-05	4.33e-05	9.17e-05	6.44e-05	5.81e-05	1.17e-05	2.51e-05	1.38e-05	4.42e-05	3.68e-05	2.97e-05	8.59e-05	2.72e-05	7.5e-05	0.000103107	3.52e-05	6.3e-05
Gordonia_polyisoprenivorans	0.000123876	8.79e-05	4.99e-05	4.45e-05	9.06e-05	7.22e-05	0.000130192	7.7e-05	4.69e-05	7.98e-05	0.000151293	7.81e-05	3.86e-05	0.000142577	3.72e-05	3.54e-05	1.64e-05	0.000139375	3.29e-05	8.64e-05	6.53e-05	6.32e-05	9.58e-05	1.4e-05	3.78e-05	5.85e-05	5.37e-05	2.87e-05	0.000108821	5.48e-05	4.44e-05	4.78e-05	6.81e-05	3.79e-05	5.68e-05	0.00017201	1.87e-05	5.97e-05	1.65e-05	5.64e-05	3.35e-05	5.01e-05	6.16e-05	3.17e-05	5.83e-05	8.36e-05	0.000111784	0.000134952
Gordonia_sp._KTR9	6.38e-05	0.000108777	3.55e-05	1.1e-05	4.83e-05	2.32e-05	6.78e-05	6.9e-05	9.96e-05	5.35e-05	5.91e-05	5.6e-05	4.98e-05	6.79e-05	1.05e-05	2.5e-05	3.01e-05	6.96e-05	2.22e-05	4.95e-05	2.66e-05	3.59e-05	4.73e-05	1.22e-05	3.4e-05	9.2e-05	8.16e-05	3.5e-05	7.69e-05	4.13e-05	3.15e-05	4.7e-05	4.84e-05	3.26e-05	7.54e-05	8.35e-05	1.36e-05	1.84e-05	1.88e-05	7.7e-05	4.22e-05	4.2e-05	8.68e-05	3.16e-05	4.42e-05	8.3e-05	5.65e-05	9.74e-05
Gordonibacter_pamelaeae	0.000628228	0.00183103	0.000518765	0.000195165	0.000652464	0.0005213	0.00112371	0.00340622	0.0025707	0.00126752	0.00104083	0.00053151	0.00065994	0.00147329	0.000235071	0.000399689	0.000371647	0.000991222	0.000457087	0.000680566	0.000409276	0.000434639	0.0006902	0.000147953	0.000481071	0.00145878	0.00148008	0.000773196	0.000978463	0.000353375	0.000486285	0.00250784	0.00103668	0.000733265	0.00333148	0.00296366	0.000259155	0.000783305	0.000276398	0.000894755	0.000770941	0.000584245	0.000644761	0.000384573	0.000710429	0.00248201	0.00102908	0.000782151
Gramella_forsetii	0.000130828	1.51e-05	3.12e-05	2.61e-05	3.86e-05	2.18e-05	0.000138113	3.49e-05	4.02e-05	5.51e-06	7.01e-05	2.67e-05	8.24e-05	1.73e-05	0.000111074	0.000125788	0.000111764	1.88e-05	0.000156636	5.3e-05	4.1e-05	4.48e-05	9.65e-05	3.77e-05	2.83e-05	3.89e-05	5.8e-05	3.91e-05	5.25e-05	4.31e-05	2.54e-05	2.21e-05	3.91e-05	2.88e-05	1.48e-05	0.000124559	2.39e-05	2.19e-05	4.13e-05	3.08e-05	0.000202879	2.7e-05	2.2e-05	3.45e-05	3.84e-05	3.13e-05	9.52e-05	7.48e-05
Granulibacter_bethesdensis	0.000124824	3.64e-05	5.05e-05	7.39e-05	0.000175546	3.98e-05	0.000188111	6.02e-05	7.22e-05	7.19e-06	8.34e-05	2.43e-05	1.31e-05	0.00019072	3.88e-05	2.23e-05	2.33e-05	5.7e-05	3.95e-05	4.27e-05	6.61e-05	1.52e-05	0.00010141	1.26e-05	6.63e-05	3.1e-05	1.09e-05	9.79e-06	2.47e-05	3.15e-05	8.16e-05	4.34e-05	2.8e-05	3.47e-05	4.18e-05	0.000129813	3.67e-05	1.99e-05	1.44e-05	2.44e-05	5.68e-05	5.99e-05	2.66e-05	4.59e-05	4.53e-05	4.25e-05	5.76e-05	8.55e-06
Granulicella_mallensis	0.000108075	4.84e-05	8.26e-05	2.34e-05	9.25e-05	4.71e-05	8.37e-05	5.94e-05	0.000134405	0.000117954	0.000129759	7.88e-05	3.99e-05	0.00018393	5.51e-05	2.67e-05	6.56e-05	0.000107581	4.61e-05	9.16e-05	0.000106025	6.24e-05	9.98e-05	3.73e-05	4.31e-05	9.3e-05	9.21e-05	0.000157296	0.000126061	4.57e-05	4.97e-05	8.32e-05	0.000117543	7.79e-05	6.12e-05	0.000285385	3.22e-05	3.37e-05	2.38e-05	0.000102872	4.49e-05	6.78e-05	5.38e-05	5.43e-05	9.72e-05	8.53e-05	0.00018853	0.000106916
Granulicella_tundricola	0.00012514	3.96e-05	4.89e-05	3.33e-05	0.000109994	4.58e-05	0.000212367	5.94e-05	0.000260513	6.5e-05	9.55e-05	6.52e-05	3.7e-05	0.000319718	2.92e-05	6.7e-05	7.94e-05	3.52e-05	5.8e-05	5.42e-05	4.88e-05	6.18e-05	0.00010586	3.58e-05	5.19e-05	7.68e-05	6.54e-05	8.67e-05	7.08e-05	3.87e-05	0.000128648	6.34e-05	4.74e-05	7.93e-05	0.000148927	0.000376558	4.56e-05	4.58e-05	3.07e-05	0.00013571	7.41e-05	9.08e-05	8.19e-05	7.3e-05	0.000118074	6.75e-05	0.000142357	0.000116657
Haemophilus_ducreyi	7.27e-05	5.29e-06	2.94e-05	7.63e-06	2.5e-05	1.14e-05	6.93e-06	3.82e-05	4.15e-06	1.61e-05	2.6e-05	8.1e-06	1.62e-05	1.54e-05	6.98e-05	5.61e-05	3.16e-05	4.8e-05	3.22e-05	2.9e-05	7.21e-06	2.9e-05	4.17e-05	1.29e-05	2.17e-05	2.15e-06	6.78e-06	1.12e-05	1.76e-05	2.24e-05	2.14e-05	7.64e-06	2.45e-06	7.06e-06	1.49e-05	1.86e-05	2.21e-05	9.83e-06	3.98e-06	1.86e-05	9.52e-05	4.22e-05	1.74e-06	2.44e-05	8.06e-06	1.43e-05	3.16e-05	2.54e-05
Haemophilus_influenzae	0.000298946	6.99e-05	0.000193778	9.37e-05	0.000443865	0.000280256	0.000411368	0.000216342	0.000406948	9.85e-05	0.000159576	0.000120971	0.000117404	0.00026602	0.000240301	0.000219448	0.000323036	0.000969026	0.000232009	0.000252897	0.000158934	0.000125283	0.000333273	0.000134117	0.000125955	8.49e-05	0.00013593	0.000210427	0.000121549	0.000274008	0.000644367	9.66e-05	0.000103894	5.84e-05	0.000105659	0.000265726	0.000215357	7.84e-05	5.04e-05	0.000163317	0.000531273	0.000409034	5.38e-05	0.000397233	5.99e-05	5.29e-05	0.00031233	0.000177243
Haemophilus_parainfluenzae	6.86e-05	1.56e-05	3.31e-05	3.97e-06	0.000116105	1.69e-05	2.77e-05	9.35e-06	2.65e-05	5.99e-06	8.83e-06	1.4e-05	0	1.23e-05	8e-06	3.92e-05	5.26e-05	0.000293947	7.62e-06	6.99e-05	2.88e-06	2.23e-06	5.15e-05	2.15e-05	1.47e-05	2.48e-05	2.11e-05	0	6.25e-06	4.88e-05	0.000247156	1.64e-05	6.68e-06	5.7e-06	7.77e-06	2.34e-05	7.02e-05	6.39e-06	0	4.36e-06	5.25e-05	0.00016565	0	0.000135408	2.73e-06	5.25e-06	2.91e-05	2.9e-05
Haemophilus_parasuis	2.62e-05	6.02e-06	1.45e-05	1.69e-05	6.94e-05	7.22e-06	2.33e-05	1.65e-06	9.13e-06	1.13e-05	2.21e-06	3.1e-06	5.1e-06	1.23e-05	2.03e-05	2.72e-05	5.44e-05	5.98e-05	2.29e-05	4.37e-05	1.83e-05	1.6e-05	6.21e-05	2.7e-05	1.77e-05	2.61e-05	1.75e-05	1.75e-05	8.68e-06	4.88e-05	6.61e-05	3.11e-05	2.76e-05	1.58e-05	2.1e-05	1.63e-05	4.08e-05	8.78e-06	8.69e-06	1.02e-05	9.47e-05	5.11e-05	1.04e-05	3.78e-05	1.5e-05	5.51e-06	6.26e-05	3.45e-05
Hahella_chejuensis	6.13e-05	1.88e-05	2.91e-05	2.36e-05	4.25e-05	3.09e-05	5.45e-05	3.13e-05	3.19e-05	2.09e-05	1.77e-05	2e-05	1.77e-05	3.7e-05	1.57e-05	2.07e-05	1.25e-05	5.08e-05	2.77e-05	3.97e-05	2.41e-05	2.51e-05	4.33e-05	1.38e-05	3.81e-05	1.81e-05	1.25e-05	9.79e-06	3.95e-05	2.49e-05	2.8e-05	2.06e-05	2.7e-05	2.34e-05	3.28e-05	5.52e-05	1.74e-05	1.41e-05	9.06e-06	1.13e-05	2.92e-05	3.62e-05	1.94e-05	2.64e-05	1.91e-05	2.7e-05	6.13e-05	3.85e-05
Halalkalicoccus_jeotgali	2.91e-05	6.99e-06	1.45e-05	8.04e-06	3.36e-05	1.36e-05	3.32e-05	8.52e-06	1.53e-05	8.87e-06	3.59e-05	1.45e-05	4.92e-06	5.25e-05	1.05e-05	0	1.25e-06	3.26e-05	5.54e-06	2.46e-05	2.47e-05	1.54e-05	2.79e-05	4.11e-06	4.45e-06	2.79e-06	9.43e-06	1.33e-05	2.83e-05	1.64e-05	1.02e-05	1.12e-05	1.74e-05	1.19e-05	9.91e-06	4.95e-05	3.63e-06	1.03e-05	4.23e-06	2.44e-05	1.3e-05	2e-05	9.26e-06	6.24e-06	6.82e-06	1.79e-05	3.77e-05	2.59e-05
Halanaerobium_hydrogeniformans	3.48e-05	7.72e-06	2.19e-05	2.03e-05	1.56e-05	3.24e-05	2.92e-05	1.07e-05	4.6e-05	2.66e-05	3.81e-05	2.41e-05	2.59e-05	3.64e-05	1.63e-05	0.000100739	3.97e-05	1.42e-05	6.79e-05	1.13e-05	3.58e-05	5.55e-05	4.33e-05	2.47e-05	3.43e-05	9.12e-06	1.47e-05	3.43e-05	1.23e-05	6.9e-05	2.06e-05	3.18e-05	3.59e-05	1.42e-05	6.02e-05	2.58e-05	1.54e-05	1.18e-05	8.57e-06	4.88e-05	5.14e-05	2.7e-05	1.65e-05	1.03e-05	1.53e-05	2.09e-05	3.89e-05	2.02e-05
Halanaerobium_praevalens	2.88e-05	1.88e-05	3.61e-05	7.79e-05	6.69e-05	0.000253586	0	8.66e-05	0.000357168	2.28e-05	5.85e-05	1.33e-05	1.08e-05	6.73e-05	0.000117228	0.000161727	2.22e-05	2.86e-05	2.69e-05	2.52e-05	1.63e-05	4.99e-05	8.83e-05	2.62e-05	3.66e-05	9.88e-06	9.69e-06	6.99e-06	2.47e-05	6.24e-05	1.9e-05	1.77e-05	6.29e-05	1.19e-05	5.28e-05	1.37e-05	5.82e-06	7.83e-06	5.8e-06	5.11e-05	5.68e-05	2.66e-05	2.08e-05	8.44e-06	9.05e-06	1.46e-05	9.35e-05	1.92e-05
Haliangium_ochraceum	0.000220259	0.000121221	0.000181741	0.000138329	0.00026443	0.000280003	0.000358895	0.000301284	0.000298263	0.000198507	0.000323017	0.00019241	0.000120685	0.000725845	8.37e-05	0.000312019	0.000196522	0.000267952	0.000258	0.000216251	0.000131759	0.000317465	0.000389247	7.59e-05	0.000172387	0.000203981	0.000140247	0.000270549	0.000253048	0.000162515	0.000155147	0.000194665	0.000247951	0.000167063	0.000277257	0.000748541	0.000145991	0.000177599	8.54e-05	0.000333317	0.000412792	0.000263752	0.000217524	0.000142197	0.00019832	0.000197377	0.00045607	0.000353536
Haliscomenobacter_hydrossis	0.000156109	3.59e-05	5.67e-05	7.42e-05	0.000121104	7.57e-05	0.000538095	7.97e-05	0.000150998	6.19e-05	0.000234118	6.02e-05	0.000302625	0.000496241	6.22e-05	0.000109996	0.000120074	9.64e-05	6.05e-05	0.000120005	7.49e-05	6.3e-05	0.000158322	5.82e-05	8.7e-05	7.69e-05	0.000176014	8.95e-05	0.000127855	0.000112123	0.000183431	4.58e-05	5.71e-05	0.000129666	5.6e-05	0.000309619	4.73e-05	2.03e-05	6.53e-05	9.76e-05	8.33e-05	0.000116392	4.86e-05	3.76e-05	0.000197079	7.92e-05	0.00018702	7.15e-05
Haloarcula_hispanica	1.64e-05	4.92e-06	2.61e-05	5.01e-06	2.47e-05	1.54e-05	1.09e-05	1.46e-05	2.57e-05	4.08e-06	2.82e-05	1.14e-05	7.66e-06	8.64e-06	8.62e-06	4.36e-06	4.36e-06	2.94e-05	7.8e-06	2.48e-05	1.34e-05	1.48e-05	4.82e-05	6.03e-06	7.34e-06	6.33e-06	8.28e-06	0	2.74e-05	1.39e-05	1.01e-05	1.32e-05	1.36e-05	5.7e-06	6.22e-06	4.73e-05	2.45e-06	5.54e-06	0	6.1e-06	7.57e-06	8.11e-06	8.68e-06	7.16e-06	1.35e-05	1.86e-05	3.86e-05	2.73e-05
Haloarcula_marismortui	5.69e-06	2.1e-06	1.53e-05	1.67e-06	1.53e-05	1.57e-05	6.68e-05	5.5e-06	9.54e-06	4.08e-06	3.26e-05	1.52e-05	3.1e-06	8.52e-05	8e-06	0	5.82e-06	2.1e-05	3.47e-07	2.42e-06	8.23e-06	8.11e-06	2.06e-05	3.01e-06	2.59e-06	5.19e-06	5.9e-06	1.26e-05	3.17e-05	1.2e-05	1.74e-05	5.68e-06	7.86e-07	6.16e-06	5.76e-06	2.56e-05	2.11e-06	8.3e-06	7.25e-06	1.02e-05	1.62e-06	1.73e-05	6.36e-06	1.5e-05	9.3e-06	1.67e-05	2.25e-05	3.64e-05
Halobacillus_halophilus	7.96e-05	3.28e-05	3.23e-05	4.09e-05	7.83e-05	2.55e-05	6.04e-05	5.97e-05	8.42e-05	3.64e-05	5.47e-05	2.67e-05	5.78e-05	0.000188868	6.43e-05	8.28e-05	9.56e-06	5.76e-05	2.93e-05	3.48e-05	5.6e-05	3.97e-05	5.6e-05	2.48e-05	4.43e-05	4.08e-05	4.33e-05	6.15e-05	2.72e-05	6.43e-05	3.3e-05	4.23e-05	4.12e-05	4.06e-05	4.59e-05	0.000118119	1.92e-05	2.2e-05	6.52e-06	3.25e-05	7.84e-05	2.6e-05	1.48e-05	4.55e-05	1.81e-05	7.74e-05	6.13e-05	3.35e-05
Halobacterium_salinarum	1.83e-05	7.49e-06	4.45e-06	9.19e-06	6.39e-06	5.89e-06	1.83e-05	1.65e-06	9.13e-06	1.08e-05	2.1e-05	0	6.02e-06	4.32e-06	3.69e-06	9.8e-06	1.56e-05	6.12e-05	1.37e-05	1.99e-05	1.38e-05	9.73e-06	1.38e-05	3.56e-06	4.96e-06	1.39e-05	6.25e-06	1.19e-05	1.05e-05	2.52e-06	7.23e-06	1.42e-05	7.95e-06	4.07e-06	9.67e-06	1.27e-05	5.99e-06	7.54e-06	6.88e-06	1.22e-05	2.16e-05	1.12e-05	1.76e-05	9.91e-06	1.2e-05	7.3e-06	1.14e-05	3.18e-05
Halobacteroides_halobius	4.55e-05	3.1e-05	2.95e-05	6.37e-06	8.39e-05	2.34e-05	8.32e-05	5.58e-05	8.46e-05	8.15e-05	3.75e-05	2.29e-05	1.24e-05	0.000117271	3.69e-05	0.000147025	0.000125475	4.26e-05	5.93e-05	3.04e-05	3.89e-05	2.27e-05	5.15e-05	5.55e-05	4.96e-05	7.99e-05	3.82e-05	0.000137022	3.05e-05	3.09e-05	2.64e-05	2.03e-05	4.92e-05	6.08e-05	7.5e-05	0.000167774	1.71e-05	1.29e-05	9.54e-06	7.18e-05	8.33e-05	4.05e-05	3.91e-05	3.28e-05	3.09e-05	4.97e-05	7.83e-05	3.04e-05
Haloferax_mediterranei	7.96e-05	1.08e-05	4.16e-05	2.44e-05	5.72e-05	2.65e-05	2.67e-05	2.34e-05	2.03e-05	3.07e-05	9.99e-05	3.45e-05	1.29e-05	6.17e-05	3.69e-05	9.8e-06	2.47e-05	0.000149173	3.26e-05	6.91e-05	6.42e-05	3.1e-05	9.18e-05	1.05e-05	5.48e-06	2.28e-06	1.37e-05	0	5.89e-05	3.06e-05	1.53e-05	2.27e-05	3.95e-05	1.95e-05	1.41e-05	0.000101342	1.53e-05	1.35e-05	0	6.34e-05	1.14e-05	3.39e-05	1.19e-05	1.83e-05	1.36e-05	4.06e-05	0.000127196	7.94e-05
Haloferax_volcanii	2.69e-05	1.18e-05	1.05e-05	4.6e-06	1.78e-05	1.21e-05	1.93e-05	3.24e-05	1.49e-05	1.41e-05	4.42e-06	9.05e-06	5.47e-06	3.83e-05	6.77e-06	2.01e-05	9.56e-06	1.36e-05	2.67e-05	5.64e-06	1.5e-05	8.11e-06	1.71e-05	6.58e-06	1.13e-05	3.18e-05	4.4e-06	1.68e-05	7.81e-06	8.82e-06	1.06e-05	1.77e-05	1.96e-05	7.7e-06	1.78e-05	4.41e-05	5.23e-06	1.21e-05	4.95e-06	3.72e-05	1.95e-05	1.41e-05	1.1e-05	1.16e-05	8.68e-06	8.58e-06	3.36e-05	1.57e-05
Halogeometricum_borinquense	7.58e-06	8.65e-07	1.84e-06	4.18e-07	2.78e-06	3.04e-06	8.91e-06	1.1e-06	2.99e-05	9.59e-07	6.63e-05	1.91e-06	2.19e-06	0	3.69e-06	0	1.02e-05	2.28e-05	1.02e-05	3.42e-06	2.06e-06	2.23e-06	9.6e-06	1.37e-06	1.03e-06	3.04e-06	2.91e-06	2.94e-05	6.71e-06	1.2e-05	5.68e-06	2.61e-06	0	1.54e-06	2.46e-06	6.1e-06	1.43e-06	1.81e-06	2.17e-06	2.32e-06	1.08e-05	7.48e-06	5.79e-07	0	3.22e-06	2.05e-06	1.13e-05	3.09e-06
Halomicrobium_mukohataei	3.16e-06	4.26e-06	2.6e-06	2.09e-06	3.33e-06	6.33e-07	6.93e-06	1.1e-06	0	9.83e-06	0	1.43e-06	1.09e-06	0	6.15e-07	4.36e-06	8.52e-06	9.8e-06	4.33e-06	6.04e-06	2.47e-06	5.68e-06	5.15e-06	2.05e-06	4.14e-07	3.1e-05	1.76e-06	4.19e-06	5.5e-06	0	4.15e-06	1.08e-05	2.06e-06	3.35e-06	5.13e-06	5.59e-06	1.94e-06	9.45e-06	5.19e-06	2.91e-06	2.33e-05	5.82e-06	3.47e-06	7.34e-07	5.58e-06	5.89e-06	1e-05	5.23e-06
Halomonas_elongata	0.000105231	5.34e-05	7.17e-05	2.81e-05	0.000133604	0.000132653	0.000149498	0.000142395	0.000375006	0.000108364	0.000125342	9.36e-05	9.13e-05	0.000164797	3.97e-05	0.000354493	0.000165154	0.000176768	0.000106215	8.88e-05	9.8e-05	9.77e-05	0.000103752	3.66e-05	8.49e-05	7.75e-05	7.73e-05	2.87e-05	0.00012016	5.42e-05	0.000133225	7.44e-05	7.47e-05	0.000109564	6.99e-05	0.000247085	6.84e-05	9e-05	5.74e-05	0.000146171	0.000142827	0.000101843	0.000165457	8.66e-05	7.86e-05	0.000107206	0.00023615	0.000120934
halophilic_archaeon_DL31	0	4.46e-06	8.68e-07	0	3.06e-06	1.01e-06	1.98e-06	3.02e-06	0	0	8.83e-06	1.43e-06	2.73e-06	4.94e-06	2.46e-06	3.27e-06	1.25e-06	0	2.08e-06	4.03e-07	3.29e-06	9.53e-06	4.45e-06	1.1e-06	2.28e-06	9.12e-06	2.11e-06	4.19e-06	3.59e-06	1.89e-06	1.24e-06	2.4e-06	1.67e-06	3.98e-06	3.27e-06	4.58e-06	5.06e-07	0	5.55e-06	6.68e-06	3.25e-06	2.49e-06	1.74e-06	4.04e-06	4.34e-06	2.56e-07	7.17e-06	5.7e-06
Halopiger_xanaduensis	0.0001283	2.27e-05	5.57e-05	2.1e-05	8.22e-05	4.59e-05	2.87e-05	3.11e-05	3.4e-05	3.67e-05	0.000108777	4.86e-05	1.39e-05	0.000116654	4.86e-05	7.62e-06	1.35e-05	0.000138975	2.22e-05	8.42e-05	4.36e-05	5.47e-05	7.24e-05	2.08e-05	1.53e-05	3.31e-05	1.9e-05	1.75e-05	8.83e-05	3.4e-05	1.8e-05	4.37e-05	6.02e-05	2.41e-05	1.61e-05	0.000167265	1.94e-05	2.55e-05	7.12e-06	8.46e-05	4.87e-06	4.76e-05	1.48e-05	2.5e-05	1.79e-05	6.92e-05	0.000140721	8.6e-05
Haloquadratum_walsbyi	3.32e-05	1.86e-06	5.96e-06	6.27e-07	3.33e-06	2.09e-06	0	3.3e-06	0	2.88e-06	3.92e-05	0	6.2e-06	1.11e-05	4.31e-06	2.18e-06	1.87e-06	5.74e-05	6.93e-07	8.66e-06	1.24e-06	1.82e-06	1.08e-05	1.37e-06	2.79e-06	0	1.76e-07	1.33e-05	5.79e-07	6.3e-06	6.36e-05	3.17e-06	2.59e-05	3.44e-06	7.87e-06	1.32e-05	5.91e-07	6.3e-06	2.42e-07	6.39e-06	0	2.29e-06	5.79e-07	1.1e-06	1.56e-05	0	1.9e-05	6.18e-06
Halorhabdus_tiamatea	0	2.1e-06	2.17e-07	0	2.22e-06	6.33e-06	5.94e-06	2.75e-06	1.2e-05	1.17e-05	0	4.76e-07	1.09e-06	0	0	2.18e-06	8.31e-07	0	0	0	3.09e-06	5.88e-06	2.81e-06	2.74e-07	2.28e-06	7.48e-06	6.87e-06	0	3.99e-06	0	2.68e-06	9.31e-06	4.03e-06	1.45e-06	4.82e-06	7.63e-06	8.44e-07	2.96e-06	2.66e-06	9.01e-06	5.41e-06	2.91e-06	1.74e-06	4.4e-06	2.73e-06	4.74e-06	7.86e-06	3.33e-06
Halorhabdus_utahensis	5.47e-05	1.18e-05	3.76e-05	1.02e-05	5.06e-05	2.29e-05	1.73e-05	2.31e-05	1.87e-05	1.05e-05	6.57e-05	3.45e-05	1.95e-05	3.7e-05	2.83e-05	4.36e-06	6.02e-06	6.58e-05	8.84e-06	4.99e-05	6.59e-05	2.33e-05	5.27e-05	1.18e-05	3.83e-06	6.71e-06	1.31e-05	1.12e-05	5.63e-05	3.02e-05	1.32e-05	2.19e-05	3.69e-05	1.48e-05	7.73e-06	8.74e-05	7.26e-06	1.03e-05	1.69e-06	2.82e-05	5.41e-06	1.79e-05	7.23e-06	6.42e-06	1.87e-05	4.23e-05	7.08e-05	5.61e-05
Halorhodospira_halophila	0.000111868	2.98e-05	5.26e-05	1.74e-05	7.89e-05	4.15e-05	7.08e-05	4.7e-05	4.56e-05	2.25e-05	7.23e-05	4.93e-05	2.57e-05	0.000117888	4.06e-05	0.000109996	5.11e-05	0.000102182	7.21e-05	7.85e-05	4.08e-05	4.36e-05	0.000110076	1.3e-05	2.57e-05	3.42e-05	2.6e-05	3.15e-05	6.16e-05	3.53e-05	5.87e-05	3.54e-05	6.39e-05	2.66e-05	4.37e-05	0.000148285	3.43e-05	4.96e-05	1.56e-05	8.14e-05	0.000106038	6.38e-05	6.28e-05	2.42e-05	3.44e-05	4.51e-05	0.000109583	9.79e-05
Halorubrum_lacusprofundi	2.46e-05	1.18e-05	1.78e-05	5.12e-06	2.67e-05	1.27e-05	9.9e-06	2.03e-05	3.03e-05	1.85e-05	4.86e-05	1.6e-05	3.83e-06	1.91e-05	1.48e-05	3.27e-06	1.23e-05	4.16e-05	2.44e-05	1.71e-05	1.19e-05	1.26e-05	2.6e-05	3.7e-06	6.1e-06	1.57e-05	3.03e-05	1.4e-05	3.45e-05	1.54e-05	1.06e-05	1.86e-05	1.56e-05	2.74e-05	1.48e-05	7.71e-05	1.05e-05	1.58e-05	2.17e-06	2.21e-05	1.24e-05	9.77e-06	2.4e-05	9.36e-06	2.17e-05	2.7e-05	4.59e-05	3.4e-05
Haloterrigena_turkmenica	3.79e-06	5.56e-06	1.14e-05	3.34e-06	9.44e-06	6.72e-06	3.71e-05	4.4e-06	6.64e-06	8.39e-06	1.38e-05	2.38e-06	0	1.79e-05	4.92e-06	5.45e-06	1.1e-05	4e-06	1.49e-05	1.21e-05	1.65e-06	9.33e-06	6.09e-06	9.73e-06	1.51e-05	7.6e-06	3e-06	4.19e-06	6.25e-06	5.04e-06	6.48e-06	4.82e-06	9.72e-06	2.99e-06	1.09e-05	1.27e-05	4.64e-06	4.2e-06	6.28e-06	1.69e-05	4.33e-06	3.95e-06	6.36e-06	7.34e-06	1.64e-05	7.04e-06	1.53e-05	2.33e-05
Halothece_sp._PCC_7418	2.5e-05	9.98e-07	1.23e-05	2.72e-06	1.78e-05	3.61e-06	0.00026088	7.97e-06	4.15e-06	4.56e-06	7.29e-05	1.17e-05	8.2e-06	9.38e-05	1.91e-05	2.07e-05	1.39e-05	4.4e-06	1.11e-05	9.46e-06	1.32e-05	1.18e-05	1.69e-05	6.16e-06	6.31e-06	1.2e-05	2.2e-06	5.59e-06	4.92e-06	2.52e-06	2.04e-05	1.21e-06	5.11e-06	2.18e-05	2.26e-05	1.61e-05	4.98e-06	4.2e-06	2.66e-06	6.1e-06	2.38e-05	1.02e-05	6.07e-06	5.5e-06	4.59e-06	5.89e-06	1.55e-05	7.6e-06
Halothermothrix_orenii	1.9e-05	9.25e-06	2.1e-05	1.84e-05	1.58e-05	4.64e-05	1.24e-05	3.33e-05	5.72e-05	1.92e-05	3.81e-05	1.02e-05	6.02e-06	4.07e-05	1.54e-05	2.78e-05	5.24e-05	5.6e-06	2.29e-05	1.93e-05	9.88e-06	1.01e-05	2.44e-05	5.34e-06	1.29e-05	1.13e-05	3.61e-06	6.99e-06	8.45e-06	2.52e-06	1.23e-05	1.17e-05	1.58e-05	7.52e-06	2.11e-05	4e-05	1.89e-05	1.83e-05	2.42e-06	2.32e-05	3.79e-05	3.74e-05	0	1.43e-05	1.27e-05	3.33e-06	4.16e-05	1.09e-05
Halothiobacillus_neapolitanus	0.000153897	2.65e-05	4.28e-05	3.25e-05	7.89e-05	3.13e-05	0.000106431	4.01e-05	9.83e-05	6.07e-05	0.000150741	4.31e-05	1.9e-05	0.000145663	6.18e-05	4.08e-05	5.4e-05	0.000130177	2.58e-05	6.32e-05	0.000127847	3.14e-05	8.71e-05	4.15e-05	4.28e-05	2.99e-05	3.15e-05	3.85e-05	6.47e-05	7.18e-05	4.93e-05	4.44e-05	2.52e-05	1.98e-05	4.51e-05	0.000107782	2.48e-05	2.23e-05	1.28e-05	5.35e-05	3.08e-05	5.18e-05	1.79e-05	1.34e-05	3.87e-05	3.7e-05	6.76e-05	8.41e-05
Halovivax_ruber	2.56e-05	2.7e-06	5.64e-06	4.49e-06	1.53e-05	3.42e-06	7.92e-06	3.99e-05	1.66e-06	1.17e-05	7.18e-06	2.29e-05	2.92e-06	1.91e-05	4.55e-05	1.14e-05	1.7e-05	1.5e-05	2.41e-05	1.17e-05	1.77e-05	1.07e-05	2.08e-05	5.34e-06	8.27e-06	4.31e-06	1.41e-06	2.03e-05	9.6e-06	6.61e-06	3.94e-06	5.99e-06	4.71e-06	2.81e-06	1.12e-05	2.58e-05	3.8e-06	1.37e-05	8.45e-07	1.28e-05	4.49e-05	1.93e-05	2.02e-06	6.97e-06	1.12e-06	3.71e-06	5.86e-05	1.14e-05
Halyomorpha_halys_symbiont	4.74e-05	1.13e-06	1.07e-05	1.47e-05	3.22e-05	7.07e-05	1.04e-05	1.37e-05	8.75e-05	1.58e-05	1.1e-06	5.48e-06	0	1.98e-05	6.49e-05	0.0001345	4.99e-05	1.26e-05	5.74e-05	1.19e-05	1.48e-05	6.08e-06	4.17e-05	2.07e-05	3.3e-05	1.9e-06	1.76e-06	4.33e-05	5.15e-06	1.61e-05	1.69e-05	3.26e-06	1.91e-05	3.35e-06	2.45e-05	2.05e-05	2.32e-05	1.58e-05	4.11e-06	1.57e-05	0.000122269	2.08e-05	1.39e-05	1.03e-05	1.36e-05	3.33e-06	3.45e-05	1.21e-05
Helicobacter_acinonychis	6.64e-06	6.66e-07	2.49e-06	0	1.33e-05	5.26e-06	0	9.9e-06	2.86e-05	1.44e-06	4.97e-06	1.19e-06	4.74e-06	0	1.48e-05	0	9.35e-06	8e-07	1.21e-05	0	8.23e-07	1.82e-06	3.04e-06	0	5.38e-06	0	3.17e-06	8.39e-06	4.57e-06	1.48e-05	8.5e-06	3.55e-07	6.09e-06	4.89e-06	6.47e-06	1.86e-06	1.35e-06	0	7.25e-07	5.81e-07	5.19e-05	0	0	0	4.96e-07	7.69e-07	6.92e-06	6.41e-06
Helicobacter_bizzozeronii	3.16e-06	5.42e-06	2.06e-06	1.67e-06	8.06e-06	2.53e-06	0	1.37e-05	1.66e-05	6.71e-06	2.21e-06	1.91e-06	6.2e-06	9.88e-06	2.46e-06	0	6.02e-06	8.2e-06	3.99e-06	8.46e-06	2.06e-06	2.64e-06	4.36e-05	3.97e-06	3.52e-06	9.5e-06	6.17e-07	2.8e-06	2.2e-06	6.3e-06	3.78e-06	5.43e-06	6.09e-06	1.81e-06	8.47e-06	6.61e-06	1.77e-06	1.62e-06	6.28e-06	0	6.49e-06	7.69e-06	0	7.34e-07	2.98e-06	2.95e-06	5.56e-05	6.41e-06
Helicobacter_cetorum	3.79e-05	4.43e-06	2.14e-05	6.37e-06	1.92e-05	1.56e-05	3.86e-05	4.89e-05	4.52e-05	1.46e-05	4.31e-05	4.05e-05	9.66e-06	6.3e-05	8e-06	2.94e-05	1.97e-05	1.78e-05	1.59e-05	2.84e-05	1.28e-05	2.86e-05	2.62e-05	7.81e-06	9.82e-06	1.06e-05	8.02e-06	3.08e-05	1.53e-05	3.53e-05	4.08e-05	7.18e-06	2.08e-05	3.83e-05	3.21e-05	3.03e-05	1.32e-05	7.16e-06	1.09e-06	3.66e-05	5.03e-05	2.29e-05	1.71e-05	8.62e-06	2.31e-05	5.76e-06	5.47e-05	3.71e-05
Helicobacter_cinaedi	0.000242064	6.24e-05	0.00013327	2.85e-05	0.000152492	0.000153431	7.67e-05	0.000614114	0.000885247	0.000326291	0.000191049	0.000283138	0.000247204	0.000174055	0.000193226	0.000136134	0.000227268	9e-05	0.000117131	6.04e-05	8.46e-05	0.000204953	0.000312428	3.82e-05	0.000127507	0.000108072	5.73e-05	0.000262159	0.000148219	0.000411012	6.14e-05	0.000215248	5.58e-05	0.000259875	0.0003968	0.000510608	4.83e-05	3.43e-05	2.92e-05	2.76e-05	0.000148778	0.000188929	0.000158515	2.09e-05	0.000101702	4.83e-05	0.000667436	0.000123072
Helicobacter_felis	8.41e-05	5.03e-05	1.53e-05	1.79e-05	1.31e-05	2.04e-05	4.55e-05	7.7e-06	1.16e-05	4.53e-05	1.1e-05	0.000155262	4.23e-05	1.05e-05	1.26e-05	9.8e-06	1.93e-05	3.88e-05	4.51e-06	4.31e-05	1.32e-05	5.05e-05	3.89e-05	1.63e-05	2.4e-05	4.93e-05	4.99e-05	3.08e-05	2.55e-05	5.26e-05	1.76e-05	2.38e-05	4.44e-05	2.33e-05	2.59e-05	1.8e-05	8.35e-06	7.44e-06	1.86e-05	2.88e-05	9.2e-06	2.33e-05	7.06e-05	2.53e-05	2.78e-05	1.75e-05	1.91e-05	6.46e-05
Helicobacter_hepaticus	3.73e-05	5.56e-06	2.1e-05	1.58e-05	1.31e-05	2.11e-05	1.58e-05	0.000104185	0.000128182	6.35e-05	2.76e-05	3.33e-05	2.84e-05	2.53e-05	2.98e-05	5.99e-05	1.14e-05	1.9e-05	1.49e-05	1.25e-05	1.83e-05	4.58e-05	5.04e-05	1.53e-05	3.27e-05	2.27e-05	6.43e-06	7.2e-05	1.82e-05	5.95e-05	1.84e-05	3.72e-05	2.97e-05	2.38e-05	0.00010253	0.000110663	5.91e-06	9.07e-06	1.33e-06	4.94e-06	3.14e-05	2.35e-05	1.1e-05	4.4e-06	3.09e-05	1.1e-05	8.76e-05	1.69e-05
Helicobacter_mustelae	6.95e-06	6.89e-06	8.46e-06	4.39e-06	2.03e-05	1.24e-05	2.28e-05	4.62e-05	7.05e-05	2.66e-05	2.54e-05	3.07e-05	2.53e-05	3.58e-05	7.69e-06	4.68e-05	2.43e-05	2.5e-05	1.65e-05	4.43e-06	1.17e-05	1.84e-05	1.29e-05	5.48e-06	7.14e-06	1.46e-05	2.38e-06	0	1.79e-05	3.84e-05	2.24e-05	1.41e-05	1.51e-05	1.13e-05	3.24e-05	0.000101511	6.08e-06	4.87e-06	7.73e-06	3.49e-06	4.87e-05	2.54e-05	0	3.3e-06	2.52e-05	2.05e-06	8.25e-05	1.71e-05
Helicobacter_pylori	9.64e-05	1.99e-05	4.72e-05	1.6e-05	7.67e-05	2.93e-05	5.05e-05	7.5e-05	4.4e-05	6.52e-05	4.42e-06	2.93e-05	0.000111205	4.94e-05	7.17e-05	6.15e-05	6.48e-05	3.46e-05	1.92e-05	3.26e-05	4.92e-05	3.73e-05	7.99e-05	2.92e-05	1.43e-05	1.34e-05	2.13e-05	9.09e-06	2.65e-05	0.000103934	2.29e-05	2.63e-05	3.67e-05	2.85e-05	0.000116274	3.86e-05	2.64e-05	1.23e-05	5.68e-06	3.46e-05	6.76e-05	1.83e-05	2.46e-05	6.24e-06	3.32e-05	1.28e-05	8.29e-05	5.35e-05
Heliobacterium_modesticaldum	0.000696486	0.00033355	0.00042822	0.000143553	0.000508306	0.000364764	0.00080838	0.000264174	0.000424371	0.000368725	0.000691863	0.000496266	0.000170454	0.00106284	0.00027507	0.000596811	0.00033093	0.000504109	0.000526222	0.00041579	0.0002734	0.000452682	0.00061221	0.00017316	0.00037797	0.000403147	0.000173371	0.000528514	0.000351166	0.000277472	0.000267976	0.00025178	0.000366476	0.000274273	0.000501158	0.000883946	0.000327762	0.000574595	0.000160477	0.000839251	0.000839109	0.000599418	0.000304013	0.000346042	0.000257233	0.000479929	0.000858608	0.000677373
Herbaspirillum_seropedicae	8.22e-05	5.81e-05	3.65e-05	1.86e-05	4.69e-05	3.99e-05	0.000129202	4.37e-05	4.19e-05	4.89e-05	0.000156815	6.22e-05	6.31e-05	0.000140108	5.11e-05	7.46e-05	7.85e-05	9.48e-05	8.21e-05	3.93e-05	5.44e-05	4.38e-05	6.39e-05	2.75e-05	4.92e-05	9.54e-05	4.62e-05	4.05e-05	5.24e-05	3.02e-05	3.79e-05	5.1e-05	4.5e-05	3.28e-05	7.3e-05	0.000103037	3e-05	7.15e-05	5.13e-05	0.000119146	9.25e-05	6.57e-05	4.86e-05	2.92e-05	6.29e-05	5.08e-05	8.58e-05	6.87e-05
Herminiimonas_arsenicoxydans	7.77e-05	4.2e-05	3.93e-05	4.56e-05	9.69e-05	3.66e-05	0.000129697	2.97e-05	3.48e-05	3e-05	5.41e-05	3.98e-05	3.04e-05	9.57e-05	2.86e-05	5.17e-05	1.6e-05	9.14e-05	2.01e-05	4.89e-05	3.93e-05	5.9e-05	8.24e-05	3e-05	9.9e-05	3.34e-05	2.76e-05	2.45e-05	4.2e-05	4.98e-05	6.2e-05	3.75e-05	2.39e-05	4.7e-05	3.14e-05	0.000138117	3.09e-05	1.39e-05	6.52e-06	7.32e-05	4.98e-05	4.86e-05	1.88e-05	2.39e-05	2.84e-05	2.89e-05	7.8e-05	5.18e-05
Herpetosiphon_aurantiacus	7.55e-05	2.04e-05	2.43e-05	1.57e-05	6.22e-05	4.1e-05	0.000230683	7.04e-05	0.000209489	1.49e-05	0.000111537	1.4e-05	1.28e-05	0.00031478	3.2e-05	5.72e-05	5.51e-05	2.22e-05	6.88e-05	2.17e-05	3.71e-05	3.24e-05	6.39e-05	3.25e-05	2.98e-05	1.38e-05	8.9e-06	3.91e-05	4.52e-05	4.25e-05	0.00016409	2e-05	6.66e-05	1.49e-05	5.26e-05	0.000154894	2.24e-05	4.6e-05	1.03e-05	6.6e-05	0.000130925	5.8e-05	2.14e-05	1.56e-05	0.000120307	1.52e-05	7.7e-05	3.64e-05
Hippea_maritima	0.000151369	1.05e-05	0.000121667	8.29e-05	0.00010805	6.55e-05	0.000123262	6.21e-05	5.1e-05	2.3e-05	6.07e-05	1.48e-05	1.64e-05	0.000178375	3.29e-05	7.46e-05	1.93e-05	6.7e-05	6.77e-05	3.89e-05	6.51e-05	3.63e-05	0.000117102	3.03e-05	4.96e-05	5.07e-06	2.09e-05	2.52e-05	7.16e-05	5.7e-05	5.93e-05	2.1e-05	3.72e-05	0.00010721	4.84e-05	3.2e-05	4.46e-05	5.92e-06	1.45e-06	0.000175522	8.12e-05	0.000102051	7.58e-05	9.98e-05	2.85e-05	4.34e-05	0.000259614	3.45e-05
Hirschia_baltica	5.56e-05	4.66e-06	1.2e-05	6.48e-06	2.61e-05	9.88e-06	0.000117817	4.23e-05	5.81e-06	6.95e-06	9.17e-05	1.91e-06	6.75e-06	9.75e-05	2.12e-05	4.19e-05	3.59e-05	2.02e-05	6.06e-05	2.8e-05	3.07e-05	5.68e-06	9.6e-06	3.77e-05	1.74e-05	1.77e-06	3.26e-06	6.29e-06	1.16e-06	5.04e-06	2.13e-05	4.11e-06	1.37e-06	9.05e-06	5.17e-06	0.00011151	8.27e-06	8.88e-06	1.21e-06	3.49e-06	1.51e-05	1.08e-05	8.1e-06	2.22e-05	0	3.46e-06	4.13e-05	8.22e-05
Histophilus_somni	0.000202879	5.58e-05	9.14e-05	2.97e-05	0.00017138	0.000133793	0.000220287	0.000155041	9.25e-05	0.000130181	0.000109329	0.000142879	4.67e-05	0.000192571	0.000103074	0.000200934	0.00019486	0.000120578	0.000143121	8.94e-05	0.000101701	9.16e-05	0.000167924	6.71e-05	9.46e-05	6.02e-05	2.94e-05	0.000230001	6.86e-05	7.75e-05	0.000160687	3.61e-05	7.77e-05	9.73e-05	0.000114059	0.000358256	7.91e-05	0.000113564	4.21e-05	0.000206616	0.000252652	0.000158792	9.08e-05	0.000106418	6.7e-05	3.65e-05	0.000202244	0.000169878
Hydrogenobacter_thermophilus	7.27e-06	1.7e-06	1.84e-06	0	1.67e-06	2.47e-06	1.73e-05	3.57e-06	1.66e-06	4.79e-06	2.76e-05	2.62e-06	4.38e-06	2.28e-05	5.23e-06	6.53e-06	4.36e-06	1.6e-06	2.77e-06	1.21e-06	1.03e-06	6.08e-07	0	3.01e-06	1.96e-06	7.98e-06	1.01e-05	8.39e-06	7.12e-06	0	5.23e-06	5.18e-06	1.83e-05	1.12e-05	6.75e-06	1.41e-05	1.27e-06	1.19e-05	2.78e-06	2.62e-06	1.62e-06	9.35e-06	6.07e-06	9.17e-07	6.57e-06	4.87e-06	3.65e-06	4.75e-06
Hydrogenobaculum_sp._HO	0	0	0	0	0	0	0	0	0	0	0	0	0	0	0	0	0	0	0	0	0	0	0	0	0	0	0	0	0	0	0	0	0	0	0	0	0	0	0	0	0	0	0	0	0	0	0	0
Hydrogenobaculum_sp._Y04AAS1	1.04e-05	2.86e-06	7.16e-06	0	7.5e-06	7.67e-06	9.9e-07	1.02e-05	2.49e-05	0	2.04e-05	4.76e-07	1.6e-05	0	7.08e-06	3.87e-05	7.89e-06	0	6.93e-07	0	0	4.87e-06	5.39e-06	3.56e-06	4.45e-06	2.91e-06	9.78e-06	0	9.37e-06	1.13e-05	7.09e-06	3.61e-06	2.95e-06	4.62e-06	5.31e-06	1.53e-06	1.35e-06	5.73e-07	3.14e-06	4.07e-06	1.14e-05	1.66e-06	1.16e-06	1.1e-06	4.22e-06	3.71e-06	6.29e-06	4.75e-06
Hyperthermus_butylicus	0	0	0	0	0	0	0	0	0	0	0	0	0	0	0	0	0	0	0	0	0	0	0	0	0	0	0	0	4.63e-07	0	0	0	0	0	0	0	0	0	0	0	0	0	0	0	0	0	0	0
Hyphomicrobium_denitrificans	0.000455371	8.11e-05	0.000224683	0.000153582	0.000387201	0.000196445	0.000290581	0.000226788	0.00014602	0.000128263	0.000378233	0.000240751	0.000132353	0.000507968	0.000196303	8.17e-05	0.000135862	0.000588494	0.000166166	0.000323974	0.000258577	0.000137852	0.000428828	5.1e-05	0.000107238	8.22e-05	0.000124302	0.000133527	0.000352207	0.000123146	0.000127803	0.00013494	0.000178819	0.000152122	0.000138347	0.00050688	0.000103206	0.000117477	3.37e-05	0.000244975	0.000156352	0.000159415	8.45e-05	9.82e-05	9.82e-05	0.000217102	0.000471545	0.000319323
Hyphomicrobium_sp._MC1	0.000127036	3.05e-05	6.37e-05	3.73e-05	0.000103883	5.13e-05	0.000113856	0.000107759	6.39e-05	6.04e-05	2.48e-05	4.64e-05	7.11e-06	0.000100606	3.66e-05	0.000107818	3.57e-05	5.92e-05	0.000112799	4.37e-05	9.16e-05	3.53e-05	0.000174951	1.34e-05	4.07e-05	3.14e-05	9.25e-06	0.000106262	3.05e-05	3.43e-05	4.84e-05	1.94e-05	2.86e-05	2.6e-05	5.23e-05	6.32e-05	3.86e-05	4.12e-05	1.03e-05	0.000146462	0.000111989	8.42e-05	0.00014087	2.26e-05	2.01e-05	2.27e-05	0.000137073	6.8e-05
Hyphomonas_neptunium	7.36e-05	2.14e-05	3.51e-05	4.77e-05	0.000108327	3.68e-05	0.000106926	2.36e-05	6.18e-05	3.48e-05	5.74e-05	3.71e-05	8.02e-06	0.000106778	2.06e-05	2.12e-05	3.66e-05	4.86e-05	0.00010015	3.64e-05	3.62e-05	4.95e-05	8.48e-05	4.08e-05	6.31e-05	4.56e-05	1.15e-05	4.96e-05	5.46e-05	6.33e-05	4.91e-05	3.01e-05	2.39e-05	2.89e-05	4.2e-05	0.000102528	2.15e-05	2.64e-05	1.33e-05	3.86e-05	2.87e-05	4.36e-05	1.21e-05	2.35e-05	2.98e-05	2.29e-05	5.67e-05	4.25e-05
Idiomarina_loihiensis	3.7e-05	4.43e-06	1.08e-05	7.1e-06	2.58e-05	4.75e-06	3.86e-05	5.77e-06	1.29e-05	9.83e-06	1.88e-05	1.02e-05	2.19e-06	2.78e-05	2.52e-05	2.78e-05	9.35e-06	9.2e-06	4.33e-06	8.05e-06	3.5e-06	1.62e-05	1.19e-05	1.03e-05	1.6e-05	8.62e-06	3.26e-06	6.99e-06	3.3e-06	6.3e-06	1.02e-05	4.93e-06	5.99e-06	1.36e-06	1.65e-06	3.97e-05	1.63e-05	5.82e-06	2.17e-06	4.07e-06	6.01e-05	1.04e-05	1.36e-05	1.72e-05	1.3e-05	2.92e-05	9.56e-06	1.85e-05
Ignavibacterium_album	0.000751788	7.44e-05	0.000270009	0.000109806	0.00051025	0.000222862	0.000190586	0.00036506	0.000185014	0.000235188	0.000667016	0.000364103	0.000343825	0.000893728	0.000333222	0.000309296	0.000291875	0.000671279	0.000261638	0.000429482	0.00039713	0.00026496	0.000646169	0.000266179	9.56e-05	0.000136072	0.000379161	0.000225807	0.000413068	0.000259835	0.000321749	0.00017834	0.000209359	0.000325433	8.67e-05	0.00112341	0.000120759	5.34e-05	8.13e-05	0.000169419	0.000437678	0.000279756	4.05e-05	0.000170636	0.0001817	0.000311115	0.000728832	0.000516761
Ignicoccus_hospitalis	0	0	2.17e-07	0	0	0	0	0	0	0	0	0	0	0	0	0	1.25e-06	0	0	0	0	0	0	0	8.27e-07	0	0	0	0	0	0	0	0	0	0	0	0	0	0	0	0	0	0	0	0	0	0	1.43e-06
Ignisphaera_aggregans	6.32e-07	0	0	2.93e-06	0	2.53e-07	0	1.1e-06	0	5.75e-06	0	0	0	0	0	0	0	0	0	0	0	8.11e-07	9.37e-07	0	0	0	0	0	0	0	9.39e-08	1.5e-06	1.18e-06	0	1.34e-06	6.78e-07	0	0	0	0	0	0	0	0	0	0	0	0
Ilumatobacter_coccineus	0.000213307	0.000115332	0.000117872	4.42e-05	0.000185823	8.81e-05	0.000331174	0.000163012	0.000317345	0.000202104	0.000235775	0.000134306	6.91e-05	0.000257379	0.000106459	0.000335979	0.000111557	9.34e-05	0.000252975	0.000128663	0.000101907	0.000153462	0.000182211	6.53e-05	0.000205996	0.000234515	0.000159011	0.000255169	0.000166674	4.35e-05	0.000114354	0.000167986	0.000185988	0.000161449	0.000232899	0.000375203	0.000121349	0.000130742	6.74e-05	0.000252531	0.000319197	0.000208258	0.000145209	0.000139995	0.000166941	0.00021454	0.000313839	0.000193875
Ilyobacter_polytropus	2.15e-05	7.49e-06	2.02e-05	1.38e-05	2.78e-06	8.36e-06	1.09e-05	3.3e-05	1.49e-05	2.52e-05	1.77e-05	4.05e-06	1.82e-05	2.78e-05	1.11e-05	8.98e-05	3.66e-05	1.1e-05	1.77e-05	1.87e-05	1.15e-05	2.33e-05	2.3e-05	8.9e-06	1.35e-05	6.97e-06	4.05e-06	1.4e-05	7.81e-06	2.58e-05	1.12e-05	1.85e-05	3.98e-05	1.01e-05	3.61e-05	3.32e-05	1.11e-05	7.83e-06	4.23e-06	6.39e-06	0.000103333	1.43e-05	8.1e-06	2.68e-05	1.97e-05	6.4e-06	2.54e-05	3.8e-06
Intrasporangium_calvum	0.000314746	0.000110474	0.0001	8.02e-05	0.0002086	0.000182129	0.000218307	0.000215242	0.000314856	0.000153436	0.000229149	0.000140259	6.36e-05	0.000372181	9.45e-05	3.54e-05	4.55e-05	0.000254354	5.41e-05	0.000181014	0.000178286	8.43e-05	0.000203055	5.06e-05	9.97e-05	0.000125683	7.59e-05	6.5e-05	0.000252759	0.000146137	0.000121747	0.000167944	0.000146708	0.000131205	0.000159753	0.000383676	3.44e-05	6.2e-05	8.94e-06	0.00015518	7.63e-05	0.000118678	0.000138266	4.68e-05	0.000185421	0.000210441	0.000210799	0.000205279
Isoptericola_variabilis	0.000271137	0.000268497	0.000135981	2.33e-05	0.000211933	0.00016078	0.000169794	0.000375781	0.000507752	0.000243579	0.000272218	0.000214795	0.000153135	0.000149983	6.25e-05	4.9e-05	5.61e-05	0.000471715	0.000117824	0.000198532	0.000188992	0.000137041	0.000175185	3.69e-05	0.000177041	0.000232868	0.000181476	0.000167083	0.000369158	0.000210702	9.13e-05	0.000284868	0.000175284	0.000327153	0.000267556	0.000252169	3.12e-05	7.38e-05	1.75e-05	0.000216496	0.000132548	0.000128031	0.00025021	7.98e-05	0.000155778	0.000388606	0.000199664	0.000342844
Isosphaera_pallida	5.72e-05	1.54e-05	1.87e-05	3.41e-05	5.11e-05	4.81e-05	0.000116827	4.73e-05	5.23e-05	3.19e-05	4.42e-05	1.55e-05	5.74e-05	6.3e-05	1.69e-05	3.65e-05	9.58e-05	4.46e-05	4.8e-05	4.47e-05	4.16e-05	4.26e-05	7.54e-05	2.62e-05	1.77e-05	3.76e-05	1.85e-05	5.59e-05	3.87e-05	1.83e-05	3.4e-05	4.27e-05	2.01e-05	1.38e-05	6.78e-05	0.000136591	1.85e-05	1.93e-05	1.23e-05	6.89e-05	9.14e-05	3.28e-05	1.74e-05	2.68e-05	3.72e-05	3.8e-05	5.39e-05	2.61e-05
Jannaschia_sp._CCS1	2.88e-05	3.98e-05	3.67e-05	1.39e-05	5.28e-05	2.46e-05	6.39e-05	4.18e-05	1.45e-05	4.87e-05	4.97e-05	4.76e-05	1.37e-05	0.000181461	2.49e-05	5.94e-05	7.42e-05	2.82e-05	6.32e-05	3.2e-05	1.26e-05	4.85e-05	4.92e-05	2.08e-05	3.98e-05	4.18e-05	1.85e-05	6.71e-05	3.04e-05	3.68e-05	3.8e-05	2.13e-05	4.52e-05	3.5e-05	5.05e-05	0.000113883	2.91e-05	2.34e-05	1.1e-05	9.21e-05	0.000111448	5.32e-05	2.29e-05	3.28e-05	2.64e-05	3.23e-05	7.5e-05	5.08e-05
Janthinobacterium_sp._Marseille	1.3e-05	2.74e-05	1.49e-05	8.78e-06	9.89e-05	2.14e-05	3.56e-05	2.39e-05	1.08e-05	1.03e-05	4.53e-05	2.26e-05	1.24e-05	0.000125912	9.54e-06	8.77e-05	1.43e-05	4.78e-05	2.08e-05	6.85e-06	2.45e-05	2.74e-05	2.69e-05	7.12e-06	9.1e-06	7.11e-05	1.21e-05	8.39e-06	2.01e-05	1.83e-05	0.000202865	2.79e-05	2.2e-05	1.66e-05	1.93e-05	4.93e-05	4.3e-06	7.25e-06	2.42e-06	4.27e-05	3.52e-05	4.8e-05	2.6e-05	7.71e-06	1.54e-05	1.67e-05	1.45e-05	1.35e-05
Jonesia_denitrificans	2.75e-05	2.03e-05	2.32e-05	9.3e-06	1.39e-05	1.5e-05	2.72e-05	4.73e-05	0.000174229	1.08e-05	2.71e-05	1.55e-05	2.1e-05	4.2e-05	6.77e-06	2.29e-05	2.87e-05	2.04e-05	9.53e-06	1.95e-05	9.88e-06	1.4e-05	2.53e-05	8.9e-06	1.5e-05	8.24e-06	4.51e-05	2.38e-05	5.51e-05	2.27e-05	1.38e-05	1.45e-05	1.3e-05	1.19e-05	7.06e-05	2.49e-05	1.5e-05	1.32e-05	1.17e-05	6.97e-06	1.3e-05	7.9e-06	6.94e-06	1.3e-05	1.05e-05	0.000103364	1.53e-05	1.12e-05
Kangiella_koreensis	0.000100807	9.78e-06	2.66e-05	2.02e-05	0.000118327	3.76e-05	0.000298007	3.63e-05	0.00019497	2.73e-05	0.000138594	4.19e-05	5.51e-05	0.000357368	5.66e-05	4.74e-05	5.48e-05	2.9e-05	2.69e-05	3.58e-05	6.07e-05	2.43e-05	6.91e-05	3.29e-05	2.17e-05	2.53e-05	3.62e-05	4.89e-05	6.73e-05	5.04e-05	0.000135337	3.23e-05	5.09e-05	3.27e-05	4.32e-05	0.000148793	3.93e-05	1.59e-05	1.64e-05	8.63e-05	5.36e-05	5.28e-05	4.69e-05	2.35e-05	9.7e-05	1.82e-05	8.74e-05	4.3e-05
Ketogulonicigenium_vulgare	0.000109024	4.24e-05	4.33e-05	4.94e-05	0.000120549	4.09e-05	0.000253949	4.78e-05	1.41e-05	3.69e-05	8.17e-05	3.6e-05	1.09e-05	0.000191337	5.05e-05	9.69e-05	4.18e-05	8.94e-05	5.96e-05	5.17e-05	5.06e-05	4.2e-05	0.000140288	3.19e-05	7.64e-05	4.26e-05	1.96e-05	6.36e-05	1.78e-05	4.63e-05	0.000138177	6.03e-05	3.67e-05	4.32e-05	3.95e-05	8.29e-05	4.11e-05	5.56e-05	2.43e-05	6.39e-05	9.79e-05	7.11e-05	2.37e-05	4.97e-05	3.25e-05	1.67e-05	0.000116943	8.62e-05
Kineococcus_radiotolerans	0.0001125	0.000146943	8.4e-05	1.87e-05	0.000164991	0.000125685	0.00017722	0.000263074	0.000308219	0.000230154	0.000186632	0.000195982	9.22e-05	9.88e-05	4.62e-05	9.31e-05	3.95e-05	0.000243556	0.000119903	0.000114367	0.000114054	0.000102781	0.000117571	1.15e-05	0.000137124	0.000199547	9.51e-05	0.000213922	0.000225394	0.000109918	8.37e-05	0.000234224	0.000135023	0.00021768	0.000221581	0.000206921	3.35e-05	6.81e-05	2.32e-05	0.000138906	0.000130384	0.000108078	0.000185127	6.48e-05	0.000142631	0.000287164	0.00015953	0.000182945
Kinetoplastibacterium_blastocrithidii	0	3.93e-06	7.59e-07	7.31e-07	1.11e-06	1.96e-06	3.47e-05	1.37e-06	0	3.36e-06	1.27e-05	1.91e-06	1.09e-06	0	1.54e-06	1.42e-05	1.39e-05	1.8e-06	7.62e-06	4.03e-07	4.12e-06	3.85e-06	2.08e-05	2.74e-06	7.24e-07	3.42e-06	2.11e-06	6.29e-06	9.26e-07	1.61e-05	4.04e-06	2.4e-06	2.06e-06	8.15e-07	4.04e-06	3.73e-06	0	7.63e-07	7.25e-07	2.73e-05	2.16e-05	4.16e-07	6.65e-06	0	6.2e-07	0	6.73e-06	7.84e-06
Kitasatospora_setae	0.000182654	0.000199817	0.000128498	5.54e-05	0.000131937	0.000158626	0.000157419	0.000382378	0.000349702	0.000259402	0.000207614	0.000245275	9.44e-05	0.000234542	5.85e-05	4.47e-05	4.82e-05	0.000300546	6.12e-05	0.00020417	0.0001402	0.000105822	0.000171437	2.53e-05	0.000139709	0.000207148	0.000117254	0.000290123	0.000293603	0.000179522	9.03e-05	0.000230007	0.000159474	0.000266214	0.000214094	0.000311483	2.89e-05	5.38e-05	3.39e-05	0.000246719	0.000124974	0.00015796	0.000161118	7.38e-05	0.00016322	0.000295233	0.00021407	0.000250184
Klebsiella_oxytoca	5.62e-05	4.82e-05	3.4e-05	6.48e-05	7.83e-05	6.21e-05	7.92e-05	5.33e-05	9.13e-05	6.38e-05	9.06e-05	2.71e-05	2.26e-05	5.86e-05	1.29e-05	6.43e-05	1.6e-05	3.96e-05	0.000113319	3.28e-05	4.63e-05	4.34e-05	3.37e-05	6.11e-05	2.41e-05	0.000153556	2.48e-05	7.55e-05	7.46e-05	4.47e-05	7.74e-05	8.77e-05	3.54e-05	6.11e-05	6.68e-05	0.000137778	1.49e-05	2e-05	2.32e-05	9.21e-05	0.000162844	5.86e-05	3.41e-05	5.65e-05	6.75e-05	4.47e-05	8.78e-05	0.000118796
Klebsiella_pneumoniae	6.64e-05	6.03e-05	1.76e-05	4.65e-05	5.28e-05	5.37e-05	5.89e-05	5.91e-05	6.55e-05	3.19e-05	5.36e-05	3.69e-05	4.38e-05	4.14e-05	3.29e-05	5.12e-05	1.52e-05	3.02e-05	2.58e-05	3.62e-05	2.24e-05	3.28e-05	3.91e-05	1.25e-05	2.84e-05	4.84e-05	3.1e-05	4.12e-05	4.11e-05	4.69e-05	5.78e-05	3.92e-05	4.42e-05	3.06e-05	4.9e-05	6.74e-05	1.79e-05	1.3e-05	3.72e-05	2.96e-05	2e-05	3.28e-05	7.32e-05	3.94e-05	3.67e-05	5.99e-05	5.47e-05	3.56e-05
Klebsiella_variicola	5.06e-06	1.4e-06	1.52e-06	1.57e-06	1.67e-06	3.04e-06	8.91e-06	1.65e-06	7.3e-05	1.17e-05	0	0	2.01e-06	2.47e-06	1.23e-06	2.18e-06	1.45e-06	5.6e-06	6.41e-06	3.22e-06	1.65e-06	7.1e-06	6.56e-06	0	3.52e-06	7.98e-06	3.96e-06	5.59e-06	3.82e-06	0	2.89e-06	7.01e-06	3.93e-07	7.52e-06	3.69e-05	2.68e-05	3.88e-06	1.81e-06	7.25e-07	2.91e-06	1.62e-05	3.33e-06	1.16e-06	3.3e-06	3.6e-06	0	8.81e-06	4.75e-06
Kocuria_rhizophila	0.000182022	0.000259979	9.09e-05	2.17e-05	0.000133604	0.000115675	0.000271275	0.000210569	0.000366295	0.0002244	0.000176141	0.000186695	0.000112664	0.00014196	5.42e-05	8.71e-05	7.02e-05	0.000171169	7.29e-05	0.000127455	0.000116318	0.000113931	9.46e-05	2.66e-05	0.000139192	0.000218931	0.000157426	0.000139818	0.000234998	0.000102674	6.83e-05	0.000194414	0.000149949	0.000193503	0.000211598	0.000171502	5.29e-05	0.000119385	3.97e-05	0.00023771	0.000148778	9e-05	0.00021492	6.59e-05	0.000152306	0.000270513	0.000163808	0.000265152
Kosmotoga_olearia	8.28e-05	6.49e-06	8.64e-05	4.72e-05	0.000105272	0.000220835	0.000149003	6.27e-05	0.000313611	8.15e-06	6.9e-05	1.02e-05	2.73e-05	0.000173438	6.89e-05	3.59e-05	1.16e-05	2.2e-05	5.89e-05	2.28e-05	7.56e-05	1.24e-05	0.000139586	3.79e-05	1.15e-05	8.24e-06	6.92e-05	1.19e-05	0.000164533	3.28e-05	4.46e-05	2.01e-05	1.7e-05	5.59e-05	3.01e-05	4.8e-05	2.83e-05	7.92e-06	2.9e-06	0.000138035	4.87e-05	7.69e-05	1.3e-05	5.06e-05	2.31e-05	3.29e-05	0.000194821	2.87e-05
Kribbella_flavida	0.000106811	0.000103419	3.99e-05	6.69e-06	6.39e-05	6.28e-05	0.000101976	0.000155315	0.000190822	0.000123708	8.17e-05	7.93e-05	6.31e-05	4.51e-05	2.98e-05	1.96e-05	6.48e-05	8.46e-05	7.07e-05	5.7e-05	4.49e-05	5.41e-05	4.71e-05	9.86e-06	4.37e-05	9.74e-05	6.32e-05	3.57e-05	0.000105755	6.43e-05	3.81e-05	0.000104503	5.87e-05	0.000103588	0.000117328	9.25e-05	2.21e-05	1.99e-05	1.35e-05	9.82e-05	7.9e-05	4.63e-05	9.08e-05	3.56e-05	6.88e-05	0.000154853	7.85e-05	0.000105253
Krokinobacter_sp._4H-3-7-5	5.5e-05	8.49e-06	7.4e-05	4.69e-05	3.39e-05	4.61e-05	9.41e-06	4.23e-05	2.7e-05	5.25e-05	7.12e-05	8.57e-06	0.000109747	6.6e-05	3.29e-05	9.97e-05	3.34e-05	6.82e-05	1.91e-05	2.76e-05	1.56e-05	4.87e-05	5.57e-05	2.51e-05	4.37e-05	1.27e-05	8.24e-05	2.38e-05	6.52e-05	7.87e-06	2.4e-05	1.82e-05	1.78e-05	3.38e-05	3.17e-05	3.88e-05	5.78e-05	2.97e-05	9.66e-06	7.85e-06	4.65e-05	4.01e-05	2.6e-06	5.87e-06	1.56e-05	9.35e-06	5.74e-05	1.4e-05
Kyrpidia_tusciae	9.76e-05	1.51e-05	4.44e-05	1.08e-05	5.36e-05	1.8e-05	0.000117322	8.41e-05	3.65e-05	3.98e-05	3.42e-05	4.45e-05	0.000160792	2.72e-05	6.34e-05	6.75e-05	9.95e-05	4.56e-05	8.21e-05	4.35e-05	3.97e-05	1.7e-05	7.89e-05	3.7e-05	4.5e-05	7.26e-05	0.000107388	5.1e-05	7.29e-05	4.13e-05	3.42e-05	4.32e-05	0.000109982	7.23e-05	2.34e-05	7.44e-05	2.93e-05	4.54e-05	6.32e-05	4.94e-05	5.25e-05	4.2e-05	3.76e-05	4.31e-05	5.79e-05	3.59e-05	9.92e-05	4.78e-05
Kytococcus_sedentarius	0.00012988	0.00016042	4.76e-05	1.38e-05	9.58e-05	6.16e-05	7.18e-05	0.000179781	0.000213223	0.000166382	0.000144667	0.000103349	5.72e-05	7.65e-05	1.85e-05	4.52e-05	4.01e-05	0.000124178	8.18e-05	9.2e-05	5.21e-05	9.73e-05	8.57e-05	1.79e-05	7e-05	0.000150135	0.000118223	5.38e-05	0.000138499	7.65e-05	5.65e-05	0.000130472	8.01e-05	0.000140532	0.000119964	0.000127271	2.18e-05	5.61e-05	3.25e-05	0.000144718	9.68e-05	6.73e-05	0.000124671	4.94e-05	8.25e-05	0.000178164	8.99e-05	0.000178669
Lacinutrix_sp._5H-3-7-4	1.23e-05	2.13e-06	9.22e-06	2.96e-05	3.33e-05	6.49e-05	9.7e-05	4.92e-05	6.43e-05	1.92e-05	2.65e-05	6.43e-06	4.38e-06	3.95e-05	3.54e-05	4.9e-05	3.43e-05	1.14e-05	1.98e-05	1.23e-05	9.06e-06	1.62e-05	3.96e-05	1.1e-05	1.02e-05	1.77e-06	5.11e-06	1.68e-05	1.49e-05	1.73e-05	1.13e-05	1.71e-05	3.41e-05	8.69e-06	2.3e-05	1.58e-05	6.92e-06	4.2e-06	3.74e-06	1.19e-05	3.35e-05	1.27e-05	1.16e-06	2.39e-06	1.49e-06	8.45e-06	2.59e-05	4.51e-06
Lactobacillus_acidophilus	2.94e-05	1.39e-05	2.02e-05	2.04e-05	5.14e-05	3.25e-05	3.96e-05	4.67e-05	2.32e-05	2.66e-05	4.75e-05	2.33e-05	5.47e-06	2.16e-05	2.74e-05	3.21e-05	1.75e-05	1.86e-05	3.17e-05	4.65e-05	9.06e-06	2.49e-05	3.42e-05	2.42e-05	3.08e-05	2.28e-06	5.11e-06	0.000197144	1.87e-05	2.17e-05	3.53e-05	1.71e-05	5.38e-05	1.17e-05	2.57e-05	6.41e-05	1.14e-05	1.08e-05	6.52e-06	4.07e-06	0.000126597	1.91e-05	3.18e-05	8.99e-06	2.29e-05	1.59e-05	2.74e-05	3.3e-05
Lactobacillus_amylovorus	0	0.000193362	3.25e-07	3.13e-07	1.11e-06	0	0	0	0	1.44e-06	0	0	0	0	1.23e-06	2.18e-06	3.53e-06	4.12e-05	0	3.62e-06	1.24e-06	0	1.87e-06	2.47e-06	2.59e-06	1.14e-06	2.55e-06	4.19e-06	1.04e-06	6.3e-07	1.1e-06	2.94e-06	3.04e-06	1.54e-06	3.83e-05	2.2e-06	5.06e-07	2.67e-06	2.54e-06	0	2.81e-05	1.25e-06	0	1.1e-06	4.96e-07	0	2.52e-06	0
Lactobacillus_brevis	3.44e-05	1.88e-05	1.14e-05	1.46e-06	1.5e-05	1.11e-05	1.53e-05	3.24e-05	7.55e-05	5.03e-06	6.63e-06	1e-05	2.26e-05	1.79e-05	5.54e-06	1.58e-05	6.23e-07	2.26e-05	8.84e-06	8.13e-05	7.62e-06	3.24e-06	3.75e-06	6.85e-06	8.48e-06	7.48e-06	1.87e-05	3.71e-05	2.17e-05	1.23e-05	1.75e-05	1.91e-05	1.08e-05	1.36e-05	4.32e-05	0.000109476	4.14e-06	1.17e-05	5.31e-06	7.56e-06	4.87e-06	2.87e-05	1.39e-05	3.67e-06	1.23e-05	8.71e-06	1.09e-05	7.37e-06
Lactobacillus_buchneri	7.39e-05	1.53e-05	3.71e-05	3.46e-05	4.19e-05	3.72e-05	0.000103461	2.8e-05	7.05e-05	2.54e-05	3.75e-05	3.1e-06	1.15e-05	0.000123443	3.75e-05	2.01e-05	1.23e-05	4.72e-05	3.01e-05	2.52e-05	3.07e-05	1.36e-05	3.93e-05	2.01e-05	1.71e-05	7.22e-06	2.86e-05	1.96e-05	1.79e-05	3.31e-05	2.95e-05	1.17e-05	1.8e-05	2.03e-05	1.69e-05	0.000103376	7.17e-06	1.16e-05	2.17e-06	1.31e-05	5.14e-05	1.06e-05	2.57e-05	4.04e-06	2.91e-05	5.96e-05	5.3e-05	1.31e-05
Lactobacillus_casei	5.69e-06	6.66e-07	3.14e-06	1.88e-06	5.56e-06	1.33e-06	0	2.75e-06	0	0	0	3.38e-05	0	0	2.77e-06	0	2.49e-06	2.4e-06	2.6e-06	0	7.21e-06	1.22e-06	2.34e-06	2.6e-06	1.86e-06	6.08e-06	7.93e-07	0	1.74e-06	1.89e-06	3.05e-07	2.19e-06	0	1.81e-07	1.62e-06	1.36e-06	1.52e-06	1.15e-06	1.21e-06	0	6.49e-06	0	0	2.39e-06	1.24e-06	5.12e-07	6.29e-07	2.38e-06
Lactobacillus_crispatus	0.000252808	1.97e-05	5.15e-05	4.53e-05	8.06e-05	3.09e-05	2.87e-05	3.6e-05	7.92e-05	5.51e-06	6.63e-06	5.72e-06	0	6.42e-05	0.000163996	5.28e-05	1.02e-05	3.94e-05	1.82e-05	3.99e-05	1.03e-05	4.5e-05	6.09e-05	1.29e-05	4.24e-06	2.53e-06	8.37e-06	1.68e-05	6.31e-06	0.000131335	2.72e-05	3.9e-06	1.5e-05	9.69e-06	1.65e-05	4.07e-06	1.11e-05	2.39e-06	3.5e-06	3.49e-05	4.98e-05	1.25e-05	1.16e-05	1.96e-05	7.32e-06	3.23e-05	3.82e-05	5.37e-05
Lactobacillus_delbrueckii	7.43e-05	4.07e-05	4.39e-05	2.25e-05	6.53e-05	4.15e-05	0.000127222	6.43e-05	6.22e-05	0.000130181	0.000116507	6.72e-05	0.000100267	0.000107395	6.68e-05	0.000109452	4.82e-05	7.16e-05	5.8e-05	8.92e-05	4.86e-05	6.89e-05	6.96e-05	4.37e-05	3.95e-05	9.59e-05	0.000147559	0.00013842	0.000125598	6.24e-05	6.13e-05	6.69e-05	7.85e-05	7.96e-05	7.04e-05	0.000216072	5.54e-05	6.42e-05	4.15e-05	0.000120308	0.000136876	6.13e-05	7.23e-05	4.83e-05	8.04e-05	7.74e-05	9.25e-05	8.51e-05
Lactobacillus_fermentum	0.000111552	0.000428784	5.14e-05	0.000123702	7.08e-05	9e-05	0.000156924	0.000111607	0.000129842	0.000105727	0.000119268	0.000101206	9.99e-05	0.000174672	6.68e-05	0.000109452	6.07e-05	0.000195765	0.000106041	0.000228332	7.88e-05	2.82e-05	8.41e-05	3.18e-05	0.000122129	0.000116054	0.000154342	0.000183861	8.39e-05	0.000126296	8.86e-05	7.56e-05	0.000132961	7.13e-05	0.000167591	0.000220648	4.23e-05	7.74e-05	0.000222664	7.76e-05	9.2e-05	6.71e-05	0.000193804	0.000204029	0.000180956	6.6e-05	8.77e-05	0.000170115
Lactobacillus_gasseri	8e-05	4.88e-05	2.46e-05	1.62e-05	1.42e-05	4.61e-05	1.98e-05	7.92e-05	4.07e-05	9.11e-06	1.27e-05	8.57e-06	1.64e-06	2.41e-05	3.02e-05	6.43e-05	2.35e-05	4e-06	1.25e-05	1.71e-05	7e-06	1.5e-05	2.62e-05	1.85e-05	1.57e-05	1.08e-05	3.44e-06	7.62e-05	1.46e-05	1.61e-05	1.45e-05	5.95e-06	1.86e-05	6.97e-06	4.04e-05	3.61e-05	6.41e-06	4.77e-06	2.54e-06	7.26e-05	0.00060431	1.93e-05	1.88e-05	9.91e-06	1.17e-05	7.69e-07	4.4e-05	1.05e-05
Lactobacillus_helveticus	6.92e-05	0.000128143	4.35e-05	4.87e-05	4.11e-05	1.86e-05	0.000102471	6.73e-05	3.69e-05	6.83e-05	1.88e-05	9.53e-07	1.82e-05	3.21e-05	6.25e-05	9.58e-05	9.56e-06	3.76e-05	4.37e-05	8.05e-06	4.53e-06	2.78e-05	7.28e-05	1.6e-05	1.72e-05	5.95e-06	1.04e-05	1.19e-05	2.55e-06	3.02e-05	1.83e-05	2.44e-05	4.24e-05	5.25e-06	6.48e-05	5.76e-05	1.22e-05	1.1e-05	7.73e-06	1.69e-05	0.000230471	2.29e-05	2.26e-05	5.32e-06	2.48e-06	2.68e-05	2.87e-05	9.5e-06
Lactobacillus_johnsonii	3.92e-05	4.61e-05	3.5e-05	3.34e-05	5.39e-05	9.46e-05	7.92e-06	5.97e-05	0.000185014	3.5e-05	1.6e-05	2.48e-05	0	3.15e-05	6.25e-05	8.71e-05	4.55e-05	2.06e-05	3.59e-05	1.43e-05	9.68e-06	1.89e-05	5.88e-05	2.48e-05	3.33e-05	7.48e-06	5.29e-06	0.000143314	1.63e-05	7.05e-05	2.64e-05	1.82e-05	2.69e-05	7.7e-06	3.36e-05	2.25e-05	1.47e-05	1.13e-05	1.67e-05	3.28e-05	0.000572931	2.45e-05	5.21e-06	7.52e-06	1.35e-05	2.05e-06	7.86e-05	1.5e-05
Lactobacillus_kefiranofaciens	1.55e-05	1.15e-05	7.48e-06	3.34e-06	0.000123604	2.02e-05	1.83e-05	1.29e-05	9.71e-05	1.97e-05	4.97e-06	5.72e-06	2.44e-05	0.000113568	1.45e-05	2.78e-05	3.28e-05	3.84e-05	1.58e-05	3.3e-05	1.07e-05	6.69e-06	9.37e-06	5.44e-05	1.34e-05	2.15e-05	3.77e-05	4.4e-05	1.39e-05	2.71e-05	1.5e-05	1.54e-05	2.3e-05	1.13e-05	1.98e-05	2.14e-05	6.67e-06	1.8e-05	4.27e-05	1.42e-05	0.000108743	9.56e-06	5.21e-06	2.04e-05	1.3e-05	3.88e-05	2.45e-05	1.21e-05
Lactobacillus_paracasei	0	3.33e-07	0	0	0	0	9.9e-07	0	0	0	0	0	0	0	0	0	0	0	0	4.03e-07	0	0	0	0	0	0	0	0	1.16e-07	0	7.04e-08	5.85e-07	0	0	7.73e-07	2.37e-06	0	0	0	0	0	8.31e-07	0	0	2.48e-07	0	0	0
Lactobacillus_plantarum	4.27e-05	6.56e-06	8.02e-06	3.03e-06	3.89e-06	5.45e-06	5.54e-05	2.75e-06	1.99e-05	1.22e-05	5.52e-06	9.53e-07	2.55e-06	2.35e-05	2.34e-05	1.47e-05	1.6e-05	6.8e-06	1.77e-05	5.64e-06	2.61e-05	1.4e-05	1.76e-05	3.84e-06	1.59e-05	2.31e-05	6.08e-06	4.19e-05	1.39e-05	1.7e-05	1.33e-05	8.35e-06	1.97e-05	2.45e-05	1.92e-05	1.39e-05	5.06e-06	5.15e-06	8.09e-06	1.1e-05	4.22e-05	1.97e-05	6.36e-06	3.85e-06	8.81e-06	5.12e-06	1.48e-05	4.99e-06
Lactobacillus_reuteri	6.04e-05	0.000170369	0.0174189	6.29e-05	0.000151936	0.000446358	0.000143063	0.000674866	0.000342649	7.98e-05	8.78e-05	5.24e-05	3.12e-05	0.00022837	7.05e-05	0.000215092	0.000124229	0.000154372	0.000124755	0.00256179	4.26e-05	5.78e-05	7.14e-05	6.81e-05	4.73e-05	0.000114787	8.49e-05	0.000198542	0.000139772	7.59e-05	0.000101139	4.55e-05	0.00012756	8.33e-05	0.000111669	0.000272844	8.22e-05	0.000122916	2.31e-05	6.83e-05	0.000142827	0.000186019	6.16e-05	8.33e-05	5.28e-05	0.000139099	0.000114678	0.000196251
Lactobacillus_rhamnosus	6.1e-05	2.69e-05	4.02e-05	2.46e-05	7.39e-05	2.88e-05	4.11e-05	2.03e-05	8.34e-05	2.97e-05	7.79e-05	2.86e-05	1.88e-05	9.13e-05	2.58e-05	9.8e-06	1.77e-05	6.06e-05	1.99e-05	5.56e-05	2.66e-05	1.91e-05	4.59e-05	2.51e-05	2.08e-05	2.23e-05	2.07e-05	1.26e-05	3.05e-05	3.09e-05	3.35e-05	1.75e-05	2.56e-05	5.14e-05	1.48e-05	5.56e-05	9.96e-06	8.11e-06	4.11e-06	2.24e-05	1.84e-05	2.81e-05	1.01e-05	2.05e-05	1.18e-05	1.87e-05	6.15e-05	3.16e-05
Lactobacillus_ruminis	0.00184518	0.00729239	0.00939383	5.59e-05	0.00174935	6.14e-05	0.000786104	0.000321352	0.000230645	0.000462465	0.000511305	0.000764878	0.000425315	0.000700539	0.00134735	0.000967096	7.89e-05	0.000406327	0.000206712	0.0176591	0.000239225	5.8e-05	0.000279874	0.000388788	9.87e-05	0.000248325	0.00158086	0.00162119	0.00815428	0.00148342	0.0140987	0.00100391	0.00122208	0.00227857	0.000530191	8.59e-05	0.000225231	0.00541051	9.43e-05	0.00274413	0.000169878	0.00469204	2.46e-05	0.000908957	0.000105299	0.000874939	8.09e-05	0.000315521
Lactobacillus_sakei	1.67e-05	1.2e-05	2.73e-05	2.06e-05	3.61e-05	7.23e-05	3.56e-05	7.61e-05	8.55e-05	1.63e-05	4.75e-05	1.52e-05	4.19e-06	0.000131467	3.23e-05	4.47e-05	1.31e-05	2.44e-05	1.85e-05	2.44e-05	1.71e-05	1.14e-05	3.98e-05	9.59e-06	1.42e-05	1.15e-05	7.05e-06	2.1e-05	8.1e-06	6.61e-06	3.72e-05	9.9e-06	1.94e-05	3.82e-05	3.49e-05	0.000193533	5.49e-06	1.59e-05	9.54e-06	2.15e-05	9.74e-06	2.74e-05	7.23e-06	1.08e-05	1.62e-05	2.54e-05	5.06e-05	2.59e-05
Lactobacillus_salivarius	7.96e-05	3.25e-05	3.88e-05	1.46e-05	0.000114716	8.64e-05	4.41e-05	0.000135523	0.000294529	7.55e-05	5.74e-05	2.95e-05	1.71e-05	0.000113568	9.2e-05	0.000231428	8.35e-05	4.96e-05	9.41e-05	5.03e-05	2.72e-05	6.47e-05	8.83e-05	5.04e-05	4.58e-05	1.84e-05	3.43e-05	9.16e-05	6.14e-05	8.06e-05	8.25e-05	0.000138802	0.000118525	4.79e-05	0.000116063	0.000158792	1.77e-05	2.74e-05	1.71e-05	7.03e-05	0.000185026	5.2e-05	2.23e-05	2.66e-05	2.75e-05	5.32e-05	8.79e-05	4.68e-05
Lactobacillus_sanfranciscensis	9.16e-05	2.79e-05	4.34e-05	2.73e-05	0.000146659	2.91e-05	0.000182665	6.6e-05	0.000128182	3.96e-05	8.45e-05	9.48e-05	6.02e-05	0.000201829	5.85e-05	9.53e-05	0.000100962	7.46e-05	7.42e-05	5.72e-05	6.24e-05	4.34e-05	7.17e-05	5.29e-05	4.47e-05	5.47e-05	4.52e-05	0.000118147	4.36e-05	3.06e-05	4.51e-05	4.93e-05	4.13e-05	3.32e-05	4.35e-05	6.22e-05	1.64e-05	3.77e-05	1.28e-05	7.44e-05	9.58e-05	6.28e-05	6.31e-05	2.9e-05	4.12e-05	3.02e-05	7.45e-05	5.77e-05
Lactococcus_garvieae	8.79e-05	3.09e-05	5.12e-05	1.84e-05	6.42e-05	2.88e-05	6.44e-05	7.89e-05	4.48e-05	3.98e-05	0.000112642	1.29e-05	2.48e-05	4.75e-05	8.06e-05	7.62e-05	0.000190082	3.9e-05	3.95e-05	6.54e-05	3.46e-05	5.11e-05	6.49e-05	5.67e-05	3.63e-05	3.56e-05	2.21e-05	4.4e-05	1.85e-05	9.54e-05	2.14e-05	2.97e-05	3.62e-05	3.31e-05	3.96e-05	7.85e-05	2.37e-05	2.11e-05	2.2e-05	3.84e-05	0.000194223	4.74e-05	1.82e-05	1.71e-05	1.86e-05	5.3e-05	6.83e-05	7.01e-05
Lactococcus_lactis	0.000121032	3.81e-05	7.24e-05	5.36e-05	0.000190267	0.000123721	0.000252959	0.000289739	0.000704381	8.77e-05	0.000264487	6.67e-05	1.97e-05	0.000278981	9.26e-05	0.000150292	0.000147703	7.74e-05	0.000150745	9.26e-05	6.36e-05	5.17e-05	0.000105392	6.43e-05	6.19e-05	1.86e-05	6.33e-05	0.000152402	7.71e-05	7.31e-05	7.75e-05	5.81e-05	0.000148476	7.59e-05	0.000106397	0.000463496	2.57e-05	4.43e-05	3.59e-05	7.06e-05	0.000113071	5.2e-05	0.000136242	4.42e-05	9.53e-05	0.000255783	0.000281506	3.8e-05
Laribacter_hongkongensis	0.000137464	4.73e-05	9.49e-05	0.000146269	0.000153047	0.000140762	0.000359885	8.6e-05	0.000205756	4.75e-05	0.000154054	8.03e-05	8.9e-05	0.000265403	6.86e-05	6.86e-05	0.000119243	0.000257554	8.61e-05	0.000158463	4.94e-05	6.04e-05	0.00014427	6.14e-05	0.000129471	7.02e-05	6.78e-05	0.000153101	0.000147004	0.00013102	0.000104191	7.08e-05	0.000128444	8.32e-05	0.000115289	0.000357409	5.55e-05	5.3e-05	2.87e-05	4.94e-05	0.000156352	8.75e-05	8.59e-05	8.5e-05	0.000132833	9.38e-05	0.000241371	0.000184133
Lawsonia_intracellularis	0.000218047	7.42e-06	5.04e-05	3.9e-05	0.00017138	4.9e-05	0.000114846	8.77e-05	0.000108271	3.62e-05	6.85e-05	5.57e-05	3.55e-05	0.0001685	0.000185226	0.000192221	0.000175541	9.22e-05	8.59e-05	3.99e-05	9.63e-05	6.02e-05	0.000121786	0.000103019	3.95e-05	1.33e-05	1.81e-05	0.000164287	1.4e-05	6.39e-05	6.55e-05	2.78e-05	4.3e-05	2.46e-05	3.74e-05	0.000130321	0.0001027	1.75e-05	0.000177745	4.74e-05	0.000186108	0.000104129	1.39e-05	3.01e-05	1.69e-05	8.71e-06	9e-05	4.59e-05
Leadbetterella_byssophila	0.000182654	5.01e-05	0.000315662	4.95e-05	0.000295539	0.000117893	0.000198011	0.000258401	0.000184184	0.000232791	0.000223627	0.000111207	0.000271997	0.000471553	0.000106459	0.00064582	0.000239732	0.000353736	0.000191117	0.000255514	0.000139788	0.000469508	0.000327417	0.00011713	0.000218819	0.000114027	0.000134169	0.000173375	0.000164996	0.000108658	0.000183619	0.000124502	0.000177445	0.000114544	0.00013543	0.000257761	0.000160674	3.57e-05	6.29e-05	0.000176975	0.000384659	0.000211584	0.000189465	7.93e-05	0.000134818	0.000140636	0.000505326	0.000291762
Legionella_longbeachae	7.02e-05	6.99e-07	8.78e-06	5.22e-06	1.64e-05	6.91e-06	9.9e-06	9.1e-05	1.7e-05	1.49e-05	7.18e-06	2.62e-05	2.92e-06	4.38e-05	0.000122458	8.88e-05	4.88e-05	3.2e-05	2.44e-05	1.01e-05	2.2e-05	3.51e-05	6.77e-05	3.56e-05	9.31e-06	6.21e-06	3.96e-06	1.4e-06	4.86e-06	1.98e-05	2.1e-05	4.74e-06	1.31e-05	7.88e-06	2.38e-05	8.3e-06	5.06e-06	2.58e-06	2.66e-06	4.33e-05	5.84e-05	3.7e-05	1.27e-05	1.01e-05	2.23e-06	8.45e-06	8.28e-05	1.31e-05
Legionella_pneumophila	3.25e-05	1.05e-05	1.1e-05	2.57e-05	2.67e-05	2.9e-05	4.7e-05	2.36e-05	2.7e-05	3.07e-05	4.53e-05	9.29e-06	5.1e-06	2.59e-05	1.66e-05	0.000169895	5.24e-05	2.48e-05	2.13e-05	2.56e-05	1.71e-05	1.76e-05	1.87e-05	1.66e-05	2.51e-05	2.96e-05	3.07e-05	3.08e-05	2.07e-05	2.05e-05	2.17e-05	2.21e-05	3.75e-05	2.57e-05	2.91e-05	6.83e-05	1.49e-05	8.88e-06	9.78e-06	3.2e-06	4.71e-05	1.73e-05	1.19e-05	1.85e-05	2.18e-05	1.1e-05	2.62e-05	2.73e-05
Leifsonia_xyli	0.000416501	0.000373148	0.00017838	7.52e-05	0.000317205	0.000229577	0.000385627	0.000478591	0.00057371	0.00040133	0.000523453	0.000404347	0.000211655	0.00046538	0.000167996	0.000132867	0.000171386	0.000481913	0.000175869	0.000242225	0.000278547	0.000262527	0.000248725	6.55e-05	0.000216234	0.000368306	0.000254066	0.000286628	0.000472657	0.000236529	0.000175709	0.000390811	0.000241273	0.000388274	0.000304287	0.000458581	6.03e-05	0.00012158	7e-05	0.000340582	0.000159057	0.000189137	0.000373435	0.000142013	0.000286379	0.000479929	0.000311009	0.000426952
Leptolyngbya_sp._PCC_7376	1.17e-05	5.02e-06	9.22e-06	3.66e-06	1.53e-05	7.1e-06	1.24e-05	5.5e-06	1.49e-05	3.84e-06	2.21e-06	1.4e-05	3.12e-05	2.1e-05	1.42e-05	3.21e-05	2.43e-05	4e-07	2.36e-05	1.13e-05	2.06e-05	7.1e-06	2.74e-05	6.16e-06	1.18e-05	2.61e-05	1.96e-05	0	2.79e-05	2.08e-05	1.12e-05	8.22e-06	8.54e-06	2.1e-05	5.91e-06	2.34e-05	5.74e-06	4.29e-06	1.06e-05	1.92e-05	2.11e-05	5.4e-06	4.63e-06	9.36e-06	7.07e-06	3.07e-06	2.8e-05	4.75e-07
Leptospira_biflexa	3.19e-05	1.16e-05	5.27e-05	3.18e-05	0.000101383	0.000118716	0.000103956	7.86e-05	0.000377495	4.2e-05	7.18e-05	1.31e-05	1.42e-05	0.000227752	7.6e-05	0.000183509	0.000254066	0.000106581	0.000106041	8.88e-05	0.000142876	5.17e-05	0.000133731	0.000174941	2.48e-05	9.76e-06	1.34e-05	6.01e-05	8.31e-05	4.88e-05	7.14e-05	1.24e-05	4.32e-05	3.88e-05	5.78e-05	0.000237594	2.51e-05	2.12e-05	4.95e-06	5.35e-05	0.000125515	7.32e-05	1.59e-05	2.39e-05	2.77e-05	4.92e-05	8.59e-05	7.25e-05
Leptospira_borgpetersenii	3.51e-05	4.79e-06	1.76e-05	7.73e-06	6.25e-05	2e-05	8.12e-05	1.43e-05	6.18e-05	3.09e-05	4.53e-05	2.67e-05	1.84e-05	7.16e-05	2.22e-05	5.06e-05	5.07e-05	2.18e-05	3.05e-05	1.41e-05	3.4e-05	1.56e-05	3.37e-05	2.48e-05	1.55e-05	1.11e-05	5.46e-06	1.26e-05	1.32e-05	4.47e-05	2.29e-05	2.81e-05	2.58e-05	3.63e-05	2.59e-05	5.34e-05	1.54e-05	3.24e-05	9.54e-06	1.39e-05	3.52e-05	3.82e-05	2.83e-05	9.91e-06	2.38e-05	1.17e-05	3.82e-05	2.83e-05
Leptospira_interrogans	7.17e-05	1.05e-05	3.83e-05	2.25e-05	0.000190267	4.38e-05	0.000369291	0.000106384	0.000221934	4.87e-05	7.51e-05	4.74e-05	9.86e-05	0.000278981	0.000133843	0.000179152	0.000338201	4.36e-05	0.000143295	4.07e-05	0.000196197	5.53e-05	0.0002061	4.58e-05	3.12e-05	2.03e-05	2.69e-05	0.000103466	2.51e-05	7.65e-05	4.58e-05	6.4e-05	5.55e-05	3.66e-05	5.95e-05	0.000111002	2.9e-05	7.55e-05	1.73e-05	4.79e-05	0.000165008	0.000122004	4.45e-05	3.14e-05	2.41e-05	2.92e-05	7.95e-05	6.58e-05
Leptospirillum_ferriphilum	1.52e-05	4.43e-06	5.03e-05	9.51e-06	5.83e-05	4.59e-05	6.14e-05	3.9e-05	5.64e-05	1.58e-05	1.27e-05	4.57e-05	3.99e-05	0.000109247	4.03e-05	2.29e-05	3.49e-05	9.88e-05	9.36e-06	7.45e-05	3.79e-05	2.88e-05	8.67e-05	2.96e-05	1.32e-05	1.04e-05	5.01e-05	3.01e-05	0.000113507	4.5e-05	2.17e-05	2.96e-05	7.24e-05	1.91e-05	2.07e-05	0.00017523	7.09e-06	1.57e-05	1.69e-05	2.38e-05	6.98e-05	9.56e-06	3.41e-05	1.49e-05	3.31e-05	7.02e-05	0.000116565	7.48e-05
Leptospirillum_ferrooxidans	8.85e-06	1.9e-06	7.92e-06	4.7e-06	4.44e-06	9e-06	9.41e-06	9.9e-06	1.16e-05	2.4e-06	2.37e-05	4.52e-06	1.04e-05	9.26e-06	3.69e-06	1.8e-05	1.31e-05	6.8e-06	8.49e-06	7.05e-06	7e-06	1.18e-05	1.29e-05	9.86e-06	1.17e-05	8.24e-06	8.28e-06	1.4e-05	7e-06	1.29e-05	1.07e-05	7.64e-06	1.77e-05	6.79e-06	4.15e-06	2.69e-05	6.24e-06	9.45e-06	1.34e-05	0	7.57e-06	4.78e-06	2.34e-05	6.97e-06	1.19e-05	1.28e-06	7.17e-06	1.92e-05
Leptothrix_cholodnii	0.000197822	5.06e-05	4.79e-05	3.73e-05	0.000118605	4.89e-05	0.000201971	6.41e-05	0.000153902	4.67e-05	0.000202645	5.43e-05	4.72e-05	0.000252441	3.6e-05	1.47e-05	6.81e-05	0.000215361	4.7e-05	7.33e-05	9.94e-05	6.16e-05	0.000122489	3.37e-05	2.32e-05	8.1e-05	5.11e-05	1.54e-05	0.000107433	2.9e-05	0.000113462	7.98e-05	7.27e-05	4.35e-05	6.87e-05	0.000216072	3.32e-05	5.13e-05	2e-05	7.79e-05	6.06e-05	6.11e-05	3.5e-05	4.22e-05	0.000100586	7.88e-05	0.000123925	0.000105015
Leptotrichia_buccalis	0.000203827	3.77e-05	0.00013327	0.00011597	0.000239709	0.000174337	0.000414833	0.000153666	0.000456313	9.25e-05	0.000229149	5.29e-05	6.45e-05	0.000633263	0.000136612	0.000162816	0.000235785	9.7e-05	0.000122849	9.42e-05	9.96e-05	0.00011981	0.000176356	0.00010617	9.89e-05	9.01e-05	5.58e-05	0.000160791	0.00013202	6.87e-05	0.00030316	7.82e-05	0.000130604	9.75e-05	0.000145061	0.000257083	0.000116793	0.000120244	4.38e-05	0.000333027	0.000169878	0.000200776	0.000107605	0.00013816	0.000207498	9.72e-05	0.000217027	8.91e-05
Leuconostoc_carnosum	1.52e-05	4.82e-06	9.11e-06	9.93e-06	2.72e-05	3.2e-05	2.28e-05	2.83e-05	7.14e-05	2.11e-05	2.21e-06	1.21e-05	2.92e-06	1.42e-05	2.15e-05	3.1e-05	5.19e-06	2.3e-05	1.47e-05	2.19e-05	3.29e-06	6.89e-06	8.67e-06	1.33e-05	9.41e-06	1.77e-06	8.46e-06	5.38e-05	7.17e-06	2.71e-05	6.69e-06	8.37e-06	2.24e-05	7.43e-06	2.14e-05	5.68e-05	5.99e-06	1.41e-05	3.14e-06	3.34e-05	1.62e-05	1.66e-05	7.52e-06	4.4e-06	7.32e-06	1.96e-05	1.99e-05	6.41e-06
Leuconostoc_citreum	3.44e-05	5.56e-06	1.07e-05	2.93e-06	2.72e-05	8.24e-06	7.52e-05	2.83e-05	0	6.47e-06	3.48e-05	2.98e-05	4.7e-05	3.95e-05	5.72e-05	7.95e-05	7.58e-05	8.2e-06	3.83e-05	2.9e-05	1.98e-05	1.95e-05	4.87e-05	2.81e-05	2.18e-05	4.57e-05	2.6e-05	5.17e-05	1.08e-05	7.87e-06	1.65e-05	2.31e-05	2.29e-05	1.86e-05	1.92e-05	3.98e-05	1.91e-05	1.86e-05	2.32e-05	9.3e-06	2.71e-05	9.98e-06	2.31e-05	3.25e-05	2.33e-05	1.4e-05	6.29e-05	1.4e-05
Leuconostoc_gasicomitatum	6.32e-06	2.23e-06	1.52e-06	0	1.86e-05	1.14e-06	6.44e-06	4.12e-06	5.39e-06	4.08e-06	0	0	2.19e-06	0	7.38e-06	2.45e-05	1.2e-05	5.6e-06	7.28e-06	2.01e-06	1.3e-05	5.47e-06	1.87e-06	7.12e-06	5.48e-06	1.9e-06	2.91e-06	8.39e-06	4.92e-06	0	4.65e-06	4.26e-06	1.19e-05	3.62e-07	4.96e-06	1.19e-06	5.06e-07	3.82e-07	1.69e-06	6.39e-06	1.57e-05	0	1.27e-05	8.44e-06	5.83e-06	1.09e-05	1.07e-05	1.43e-06
Leuconostoc_gelidum	0	7.65e-07	0	8.88e-06	1.06e-05	2.72e-05	5.45e-06	7.42e-06	5.77e-05	0	9.94e-06	0	1.82e-06	4.32e-06	2.8e-05	2.07e-05	1.25e-06	3.4e-06	2.39e-05	0	4.53e-06	1.62e-06	2.08e-05	1.14e-05	6.2e-06	5.07e-07	3.44e-06	3.08e-05	3.99e-06	6.61e-06	4.34e-06	2.9e-06	3.04e-06	1.09e-06	7.03e-06	2.71e-06	1.69e-07	4.77e-06	3.5e-06	6.39e-06	2.22e-05	8.31e-07	8.68e-06	1.65e-06	0	3.71e-06	1.43e-05	0
Leuconostoc_kimchii	0	8.32e-07	0	0	1.36e-05	9.5e-07	0	0	0	0	0	0	0	0	0	0	1.87e-06	0	0	0	0	0	2.06e-05	0	1.96e-06	0	0	2.31e-05	0	0	1.13e-06	3.13e-07	0	6.34e-07	0	6.78e-07	1.01e-06	2.58e-06	0	0	0	0	0	0	7.44e-07	0	1.64e-06	0
Leuconostoc_mesenteroides	2.69e-05	4.33e-06	1.41e-05	6.58e-06	1.14e-05	9.57e-06	9.9e-06	3.13e-05	9.54e-06	1.41e-05	1.49e-05	1.67e-05	5.18e-05	2.35e-05	2e-05	2.07e-05	2.49e-05	9.2e-06	2.65e-05	2.44e-05	1.42e-05	1.6e-05	2.51e-05	1.73e-05	1.71e-05	3.27e-05	6.51e-05	2.94e-05	3.65e-05	2.08e-05	1.46e-05	1.69e-05	3.27e-05	2.92e-05	2.1e-05	4.02e-05	1.33e-05	5.25e-06	1.99e-05	2.32e-05	6.65e-05	9.56e-06	7.52e-06	2.04e-05	1.81e-05	2.24e-05	3.43e-05	1.85e-05
Leuconostoc_sp._C2	0	2.33e-07	0	8.36e-07	2.22e-06	5.07e-07	0	0	0	0	0	0	0	0	0	0	0	0	0	0	0	0	0	0	1.45e-06	0	1.06e-06	0	1.27e-06	0	1.27e-06	9.81e-07	1.37e-06	0	1.3e-06	0	1.69e-07	0	0	0	0	0	0	0	9.92e-07	0	1.64e-06	0
Liberibacter_crescens	7.87e-05	7.85e-06	2.53e-05	1.42e-05	5.36e-05	1.69e-05	4.7e-05	2.39e-05	6.64e-05	1.41e-05	4.47e-05	4.33e-05	1.86e-05	5.74e-05	4.28e-05	4.19e-05	4.49e-05	5.38e-05	3.26e-05	3.1e-05	1.13e-05	2.72e-05	2.65e-05	1.9e-05	1.44e-05	3.47e-05	3.69e-05	6.92e-05	2.93e-05	1.17e-05	4.08e-05	1.88e-05	4.34e-05	3.11e-05	1.42e-05	7.07e-05	1.06e-05	2.42e-05	1.23e-05	4.65e-05	2.6e-05	2.6e-05	4.02e-05	1.78e-05	1.76e-05	2.45e-05	4.12e-05	5.84e-05
Listeria_innocua	4.11e-06	3.59e-06	4.66e-06	0	2.53e-05	1.14e-05	2.97e-06	6.05e-06	4.98e-06	8.87e-06	1.44e-05	3.33e-06	3.28e-06	6.17e-06	5.54e-06	4.85e-05	4.99e-06	1.64e-05	5.72e-06	1.25e-05	5.35e-06	1.82e-05	4.22e-06	1.59e-05	9.31e-07	4.69e-06	5.46e-06	5.52e-05	7.75e-06	1.17e-05	1.27e-05	1.68e-05	1.44e-05	6.88e-06	2.17e-05	1e-05	1.35e-06	6.11e-06	1.21e-06	4.65e-06	1.08e-05	1.14e-05	1.16e-06	8.07e-06	9.8e-06	0	8.11e-06	6.41e-06
Listeria_ivanovii	4.42e-06	4.99e-06	6.07e-06	4.18e-07	2.36e-05	6.02e-06	4.95e-06	1.07e-05	3.73e-06	1.13e-05	2.15e-05	4.76e-06	2.19e-06	2.04e-05	2.06e-05	5.06e-05	1.97e-05	6e-06	1.33e-05	8.46e-06	1.83e-05	1.66e-05	1.08e-05	2.03e-05	2.32e-05	1.01e-06	5.55e-06	2.24e-05	1.08e-05	1.89e-05	6.1e-06	4.57e-06	2.13e-05	4.8e-06	2.8e-05	3.03e-05	2.19e-06	9.54e-07	6.76e-06	1.13e-05	5.68e-05	6.24e-06	2.89e-06	6.05e-06	1.36e-05	5.89e-06	1.67e-05	4.28e-06
Listeria_monocytogenes	2.12e-05	6.99e-06	1.45e-05	8.04e-06	4.36e-05	1.56e-05	9.01e-05	1.54e-05	6.8e-05	1.7e-05	2.54e-05	1.31e-05	4.74e-06	7.22e-05	3.17e-05	7.62e-05	1.18e-05	5.4e-06	1.8e-05	1.47e-05	1.36e-05	1.54e-05	1.5e-05	6.99e-06	1.5e-05	1.36e-05	7.93e-06	7.27e-05	3.82e-06	1.42e-05	4.05e-05	1.9e-05	4.29e-05	1.05e-05	4.92e-05	4.49e-05	9.54e-06	1.13e-05	3.14e-06	1.16e-05	2.33e-05	4.22e-05	9.55e-06	1.28e-05	5.71e-06	7.56e-06	3.8e-05	2.54e-05
Listeria_seeligeri	1.26e-06	2.06e-06	1.06e-05	3.45e-06	1.47e-05	7.79e-06	3.96e-06	3.16e-05	0	6.47e-06	2.48e-05	1.91e-06	1.64e-06	4.94e-06	2.83e-05	4.74e-05	3.59e-05	9.4e-06	1.73e-06	9.46e-06	8.23e-07	1.14e-05	1.43e-05	4.66e-06	1.48e-05	3.29e-06	2.2e-06	5.03e-05	9.83e-07	1.26e-06	5.56e-06	2.82e-06	1.13e-05	5.43e-07	2.3e-05	1.85e-05	1.18e-06	3.34e-06	9.66e-07	1.98e-05	1.03e-05	1.87e-06	0	5.32e-06	2.48e-06	6.66e-06	5.6e-06	6.89e-06
Listeria_welshimeri	1.52e-05	2.93e-06	5.42e-06	1.67e-06	6.11e-06	1.33e-06	5.94e-06	1.02e-05	9.54e-06	3.84e-06	0	4.29e-06	8.39e-06	4.94e-06	3.02e-05	5.45e-05	4.45e-05	6e-06	4.09e-05	5.24e-06	7.62e-06	2.31e-05	9.6e-06	3.84e-06	1.92e-05	1.34e-05	1.02e-05	9.09e-06	3.12e-06	5.04e-06	2.82e-06	6.7e-06	2.55e-06	5.34e-06	1.54e-05	5.76e-06	7.09e-06	4.87e-06	6.88e-06	2.91e-06	4.22e-05	1.08e-05	0	2.75e-06	9.3e-06	0	1.11e-05	6.89e-06
Lysinibacillus_sphaericus	8.5e-05	1.82e-05	4.51e-05	2.31e-05	0.000127215	3.6e-05	3.51e-05	4.76e-05	6.22e-05	1.82e-05	4.8e-05	2.31e-05	1.24e-05	0.00021047	7.91e-05	0.000118164	4.28e-05	7.56e-05	6.32e-05	8.11e-05	1.11e-05	5.17e-05	5.69e-05	4.9e-05	3.29e-05	1.25e-05	1.57e-05	0.000128633	4.42e-05	9.39e-05	2.76e-05	2.99e-05	3.03e-05	1.71e-05	6.27e-05	5.1e-05	7.43e-06	1.49e-05	1.22e-05	3.49e-05	6.65e-05	3.08e-05	1.74e-05	1.65e-05	8.43e-06	2.23e-05	5.13e-05	6.13e-05
Macrococcus_caseolyticus	9.16e-05	2.86e-05	4.41e-05	2.11e-05	7.39e-05	2.91e-05	0.000150488	5.97e-05	4.69e-05	6.66e-05	6.41e-05	7.1e-05	3.35e-05	4.57e-05	4.89e-05	0.000167173	0.000852982	4.56e-05	0.000109853	7.45e-05	2.57e-05	6.12e-05	6.77e-05	3.03e-05	6.45e-05	1.56e-05	2.57e-05	0.000183861	3.64e-05	7.87e-05	5.2e-05	3.51e-05	6.91e-05	4.17e-05	7.1e-05	6.12e-05	1.98e-05	5.24e-05	2.35e-05	0.000112462	9.36e-05	7.34e-05	2.02e-05	5.08e-05	3.84e-05	1.17e-05	9.23e-05	6.3e-05
Magnetococcus_marinus	4.3e-05	1.55e-05	2.64e-05	1.96e-05	5.64e-05	8.24e-06	3.27e-05	1.84e-05	1.12e-05	4.72e-05	4.75e-05	3.93e-05	2.24e-05	4.88e-05	3.6e-05	3.32e-05	1.68e-05	3.58e-05	4.83e-05	2.62e-05	2.8e-05	2.35e-05	4.47e-05	2.32e-05	3.16e-05	3.43e-05	4.22e-05	4.33e-05	4.16e-05	3.15e-05	3.46e-05	3.87e-05	1.63e-05	3.18e-05	2.26e-05	7.27e-05	1.98e-05	9.35e-06	1.5e-05	3.92e-05	5.73e-05	3.64e-05	3.88e-05	3.43e-05	2.03e-05	4.01e-05	4.57e-05	5.65e-05
Magnetospirillum_magneticum	0.00013146	8.3e-05	4.61e-05	8.59e-05	0.000122493	0.000133983	0.000146528	8.19e-05	0.000206585	0.000154874	0.000287126	9.95e-05	2.97e-05	0.000167265	8.4e-05	7.08e-05	5.51e-05	8.96e-05	0.000103616	7.55e-05	0.000129289	5.66e-05	0.000150828	7e-05	9.16e-05	0.000131764	0.000158747	0.000193648	0.000123342	4.66e-05	7.05e-05	0.000126381	6.91e-05	0.000133831	0.000139085	0.000297586	5.59e-05	9.14e-05	5.61e-05	0.000188599	0.000128761	9.44e-05	4.45e-05	8.33e-05	0.000108772	0.000120014	0.000133235	7.58e-05
Mahella_australiensis	0.000335919	5.41e-05	0.00022067	8.99e-05	0.000254431	0.000128662	0.000525224	0.00022074	0.000423956	0.000119872	0.000244609	0.000162882	0.000135999	0.000212322	0.000145842	0.000486271	0.000456821	0.000172969	0.000207231	0.000144771	0.000108907	0.00025158	0.000330462	0.000162337	0.000221508	7.01e-05	8.66e-05	0.000353741	0.000134508	0.000536047	0.00018944	7.1e-05	0.000153877	0.000117714	0.000148365	0.000170824	8.46e-05	5.72e-05	6.09e-05	7.44e-05	0.000664903	0.000264168	0.000117729	0.000143297	0.000151065	6.08e-05	0.000341707	0.000314096
Mannheimia_haemolytica	2.12e-05	6.69e-06	1.94e-05	5.12e-06	4.11e-05	1.11e-05	1.63e-05	3.05e-05	5.39e-06	1.51e-05	0	1.55e-05	6.75e-06	1.23e-05	4.12e-05	4.85e-05	2.18e-05	5.84e-05	2.77e-05	1.37e-05	5.76e-06	3.45e-06	3.86e-05	1.48e-05	9.72e-06	1.32e-05	1.03e-05	0.00137232	7.06e-06	5.04e-05	5.76e-05	8.48e-06	2.35e-05	9.15e-06	6.61e-06	1.46e-05	3.31e-05	8.11e-06	4.11e-06	5.81e-07	5.36e-05	5.11e-05	8.39e-06	1.71e-05	1.22e-05	2.56e-06	3.86e-05	1.47e-05
Mannheimia_succiniciproducens	0.000181706	6.75e-06	5.22e-05	2.66e-05	0.000137492	9.25e-06	0.000149993	1.65e-06	5.72e-05	5.03e-06	8.28e-05	2.24e-05	5.1e-06	3.83e-05	0.000129227	0.000201478	3.22e-05	0.000104181	3.33e-05	3.32e-05	2e-05	4.01e-05	4.29e-05	1.11e-05	4.08e-05	2.93e-05	2.11e-06	0.000204135	1.49e-05	0.000125351	5.34e-05	8.43e-06	1.56e-05	9.33e-06	1.75e-05	6.59e-05	8.23e-05	1.51e-05	5.55e-06	4.39e-05	0.000144991	7.38e-05	3.12e-05	3.1e-05	4.96e-06	8.33e-06	2.25e-05	5.37e-05
Maribacter_sp._HTCC2170	2.15e-05	3.36e-06	1.34e-05	6.46e-05	1.5e-05	8.37e-05	6.93e-06	9.81e-05	8.79e-05	4.79e-06	1.6e-05	4.29e-06	1.93e-05	1.91e-05	8.92e-06	1.31e-05	7.69e-06	1.08e-05	1.16e-05	6.85e-06	7.82e-06	2.03e-05	4.73e-05	5.62e-06	4.6e-05	1.24e-05	1.1e-05	2.8e-06	6.94e-05	1.26e-06	1.84e-05	1.3e-05	1.8e-05	1.77e-05	2.06e-05	3.76e-05	1.11e-05	7.83e-06	1.05e-05	2.5e-05	1.62e-05	1.35e-05	0	1.32e-05	2.95e-05	1.4e-05	2.87e-05	8.32e-06
Maricaulis_maris	6.32e-05	3.86e-05	4.53e-05	2.33e-05	4.94e-05	2.76e-05	5.59e-05	4.65e-05	3.24e-05	6.35e-05	3.87e-05	4.45e-05	2.15e-05	5.25e-05	9.85e-06	4.25e-05	4.53e-05	8.36e-05	2.81e-05	2.62e-05	3.79e-05	5.15e-05	4.24e-05	1.84e-05	5.39e-05	4.97e-05	3.03e-05	5.52e-05	3.44e-05	2.08e-05	2.71e-05	3.06e-05	4.29e-05	4.07e-05	4.88e-05	6.83e-05	2.37e-05	2.83e-05	3.08e-05	7.32e-05	6.92e-05	4.2e-05	7.38e-05	3.89e-05	3.73e-05	3.28e-05	7.68e-05	0.00010359
Marinithermus_hydrothermalis	9.13e-05	5e-05	4.64e-05	3.61e-05	9.56e-05	5.79e-05	0.000140093	0.000113531	0.000131501	6.38e-05	0.000108777	6.29e-05	2.86e-05	0.000149366	3.38e-05	6.7e-05	3.91e-05	0.000136375	5.09e-05	6.93e-05	8.26e-05	4.64e-05	0.000112886	2.1e-05	6.14e-05	6.45e-05	5.56e-05	7.97e-05	0.000151921	4.79e-05	5.21e-05	7.15e-05	0.000135416	6.32e-05	8.88e-05	0.000164893	3.17e-05	5.75e-05	3.1e-05	5.84e-05	7.41e-05	8e-05	5.58e-05	4.99e-05	9.88e-05	9.43e-05	0.000143489	9.67e-05
Marinitoga_piezophila	7.58e-05	9.98e-06	3.36e-05	1.86e-05	2.97e-05	6.11e-05	3.22e-05	6.24e-05	0.000287892	6.81e-05	4.31e-05	2.6e-05	6.38e-06	6.67e-05	4.4e-05	0.000149203	3.53e-05	1.86e-05	7.68e-05	2.09e-05	2.08e-05	4.97e-05	5.5e-05	1.62e-05	2.99e-05	1.27e-05	2.34e-05	4.19e-05	3.33e-05	7.46e-05	4.39e-05	3.06e-05	8.61e-05	4.32e-05	0.000128998	0.000236578	1.02e-05	1.67e-05	5.19e-06	3.23e-05	9.68e-05	3.41e-05	1.04e-05	1.61e-05	3.53e-05	1.65e-05	6.5e-05	4.75e-05
Marinobacter_adhaerens	0.000131144	1.26e-05	9.11e-06	2.06e-05	0.000124715	5.35e-05	0.000374736	4.81e-05	0.000348872	2.76e-05	0.000125894	1.21e-05	1.99e-05	0.000456122	2.49e-05	6.97e-05	3.14e-05	1.76e-05	5.13e-05	1.55e-05	1.75e-05	3.08e-05	5.9e-05	2.95e-05	3.06e-05	1.66e-05	1.07e-05	4.19e-06	6.16e-05	1.26e-05	0.000204508	3.06e-05	5.29e-05	1.7e-05	6.19e-05	0.000150827	3.85e-05	2.51e-05	8.57e-06	7.12e-05	8.33e-05	9.33e-05	2.08e-05	2.02e-05	0.000122787	1.82e-05	5.59e-05	3.16e-05
Marinobacter_hydrocarbonoclasticus	0.000137148	3.4e-05	4.09e-05	5.83e-05	7.97e-05	6.11e-05	8.71e-05	7.61e-05	0.000127768	3.98e-05	0.000104359	4.12e-05	9.02e-05	0.00011295	2.74e-05	5.5e-05	4.94e-05	9.36e-05	8.07e-05	5.34e-05	4.06e-05	4.36e-05	0.000107266	3.4e-05	1.83e-05	6.31e-05	5.95e-05	3.64e-05	5.63e-05	2.36e-05	3.65e-05	5.1e-05	4.59e-05	4.93e-05	6.95e-05	0.000156419	4.68e-05	4.38e-05	3.56e-05	6.74e-05	6.22e-05	4.95e-05	2.63e-05	3.87e-05	5.78e-05	8.52e-05	0.000101594	6.72e-05
Marinobacter_sp._BSs20148	2.97e-05	1.18e-05	1.14e-05	2.82e-06	1.86e-05	8.93e-06	1.58e-05	1.87e-05	1.41e-05	5.51e-06	2.54e-05	6.43e-06	2.37e-06	3.52e-05	2.46e-06	1.31e-05	1.87e-05	1.94e-05	2.11e-05	1.71e-05	9.47e-06	1.01e-05	1.48e-05	1.3e-05	5.69e-06	6.46e-06	4.67e-06	0	6.54e-06	6.93e-06	1.76e-05	5.3e-06	9.03e-06	8.69e-06	1.83e-05	4.12e-05	1.51e-05	7.06e-06	5.55e-06	5.81e-06	1.19e-05	1.33e-05	8.68e-06	1.17e-05	9.43e-06	2.82e-06	3.13e-05	1.54e-05
Marinomonas_mediterranea	5.69e-06	3.33e-06	7.48e-06	1.04e-06	1.22e-05	6.59e-06	1.83e-05	1.79e-05	6.22e-06	1.92e-06	1.44e-05	5.48e-06	1.18e-05	1.42e-05	1.63e-05	9.42e-05	9.56e-06	1.04e-05	1.91e-05	1.35e-05	2.88e-06	1.28e-05	1.15e-05	4.93e-06	1.01e-05	3.8e-07	4.58e-06	1.33e-05	7.64e-06	5.98e-06	9.93e-06	8.58e-06	2.07e-05	6.07e-06	9.1e-06	1.66e-05	2.7e-06	2.39e-06	1.81e-06	1.34e-05	8.44e-05	9.35e-06	1.42e-05	4.04e-06	1.19e-05	2.18e-06	2.05e-05	9.03e-06
Marinomonas_posidonica	2.02e-05	1.86e-06	1.55e-05	4.91e-06	1.19e-05	4.05e-06	0.000215832	1.4e-05	2.24e-05	5.27e-06	8.17e-05	1.91e-06	3.28e-06	0.000101841	1.14e-05	1.09e-06	0.000150196	1.02e-05	3.29e-06	1.85e-05	4.94e-06	1.95e-05	2.08e-05	1.37e-05	5.79e-06	3.42e-06	4.4e-06	5.59e-06	2.22e-05	1.04e-05	1.68e-05	5.87e-06	2.85e-06	2.36e-05	2.53e-05	4.41e-06	2.53e-06	6.68e-07	0	1.42e-05	8.12e-06	5.2e-06	2.31e-06	4.04e-06	7.44e-07	6.02e-06	1e-05	1.21e-05
Marinomonas_sp._MWYL1	0.000743256	5.51e-05	1.93e-05	4.81e-05	0.000193045	4.18e-05	3.76e-05	0	3.32e-06	4.56e-06	0	8.1e-06	1.7e-05	0.000148749	6.83e-05	3.32e-05	7.06e-05	0.000126977	7.83e-05	4.67e-05	2.94e-05	0.000120418	0.000239123	4.77e-05	2.86e-05	6.21e-06	8.72e-06	2.1e-05	4.22e-06	3.5e-05	1.77e-05	5.91e-06	7.56e-06	1.1e-05	1.03e-05	1.47e-05	3.78e-05	8.49e-06	7.37e-06	0.000107812	0.000468516	7.27e-06	0	1.94e-05	7.32e-06	7.56e-06	1.23e-05	8.13e-05
Marivirga_tractuosa	6.29e-05	2.85e-05	1.55e-05	8.99e-06	5.08e-05	6.52e-06	0.000746007	1.35e-05	3.65e-05	4.05e-05	8.89e-05	2.86e-05	4.74e-05	3.52e-05	5.48e-05	7.9e-05	0.000121736	3.76e-05	7.76e-05	8.8e-05	3.05e-05	6.1e-05	5.06e-05	2.69e-05	2.14e-05	1.23e-05	3.17e-05	2.66e-05	4.17e-05	3.12e-05	2.09e-05	2.82e-05	3.9e-05	4.07e-05	4.82e-05	0.000137269	3.57e-05	8.97e-06	1.47e-05	3.57e-05	4.22e-05	3.53e-05	4.02e-05	2.02e-05	5.57e-05	3.54e-05	8.05e-05	5.49e-05
Megamonas_hypermegale	0.000203511	5.69e-05	0.000109305	8.1e-05	0.000157214	0.000200943	0.000212862	0.000176207	0.000272958	0.000172375	0.000166754	0.000102158	9.79e-05	0.000258613	0.000205533	0.000338701	0.000552381	0.00011278	0.000152824	5.88e-05	9.24e-05	0.00016076	0.000193921	8.51e-05	0.000188313	0.000249338	8.07e-05	0.000326476	7.03e-05	0.000231489	0.000145618	0.000102102	0.000150342	0.000145603	0.000168716	0.00022624	4.64e-05	2.59e-05	3.21e-05	0.000122052	0.00032623	0.000127615	4.4e-05	8.42e-05	6.19e-05	7.31e-05	0.000285657	0.000106203
Megasphaera_elsdenii	0.00256063	0.0026877	0.00462443	0.0031289	0.00425866	0.00358017	0.00248652	0.00788617	0.00622908	0.00602595	0.0055592	0.00278161	0.00598358	0.00290276	0.000541217	0.000363205	0.000581881	0.00353756	0.000675581	0.00048143	0.00500931	0.00251174	0.00119374	0.000216587	0.00293203	0.00842492	0.00655259	0.00966844	0.0048856	0.00171743	0.00388019	0.00547764	0.00285296	0.00987327	0.00339795	0.00552856	0.000266243	0.000327427	0.000126667	0.00269356	0.00143098	0.00156048	0.000998527	0.00105611	0.00038833	0.00640354	0.0080788	0.00111525
Meiothermus_ruber	6.26e-05	6.23e-05	6.01e-05	3.07e-05	8.58e-05	7e-05	0.000160389	8.8e-05	0.000185844	9.35e-05	0.000150189	5.95e-05	3.04e-05	0.000153687	4.65e-05	8.55e-05	4.65e-05	8.74e-05	7.78e-05	6.22e-05	6.49e-05	4.48e-05	8.78e-05	3.3e-05	5.35e-05	9.39e-05	4.02e-05	0.00011535	7.41e-05	6.05e-05	6.5e-05	6.93e-05	7.09e-05	8.8e-05	0.000139788	0.000313008	4.46e-05	5.07e-05	3.42e-05	0.000110428	6.49e-05	9.25e-05	5.12e-05	5.56e-05	6.14e-05	0.000101698	0.000152107	9.62e-05
Meiothermus_silvanus	6.6e-05	2.69e-05	4.67e-05	1.34e-05	5.56e-05	4.74e-05	0.000115836	3.77e-05	4.77e-05	4.08e-05	0.000113194	3.52e-05	2.3e-05	0.000141342	3.63e-05	7.73e-05	3.72e-05	7.84e-05	5.44e-05	3.64e-05	4.88e-05	7.95e-05	6.07e-05	4.22e-05	3.02e-05	2.01e-05	2.48e-05	6.29e-05	5.07e-05	5.17e-05	6.83e-05	3.63e-05	2.32e-05	3.28e-05	6.76e-05	8.42e-05	3.7e-05	4.07e-05	1.03e-05	6.04e-05	3.46e-05	7.4e-05	3.38e-05	2.64e-05	3.58e-05	2.66e-05	7.15e-05	5.46e-05
Melioribacter_roseus	9.61e-05	2.3e-05	5.76e-05	1.79e-05	4.81e-05	2.85e-05	0.000212367	3.52e-05	0.000103293	3e-05	0.000146324	5.26e-05	1.84e-05	9.57e-05	1.57e-05	9.47e-05	9.97e-05	6.66e-05	4.42e-05	6.02e-05	2.86e-05	5.01e-05	7.21e-05	2.49e-05	2.48e-05	2.51e-05	2.26e-05	0.000226506	9.19e-05	9.2e-05	5.79e-05	3.52e-05	3.87e-05	2.65e-05	6.16e-05	7.76e-05	2.44e-05	1.46e-05	2.02e-05	4.21e-05	8.66e-05	5.2e-05	8.27e-05	4.28e-05	2.37e-05	3.18e-05	8.89e-05	5.27e-05
Melissococcus_plutonius	0.000103335	3.19e-05	5.67e-05	4.15e-05	0.000134715	8.79e-05	0.000224248	0.000139921	0.000297018	9.21e-05	0.000113194	2.64e-05	9.84e-06	0.00026602	6.46e-05	0.000171529	5.26e-05	3.32e-05	7.71e-05	2.34e-05	4.92e-05	6.79e-05	8.15e-05	3.45e-05	7.4e-05	6.75e-05	3.31e-05	5.8e-05	4.46e-05	6.77e-05	0.000144914	4.81e-05	8.42e-05	3.4e-05	0.000112372	0.000164215	1.75e-05	3.24e-05	1.01e-05	7.47e-05	6.11e-05	8.19e-05	3.24e-05	2.46e-05	0.000113609	6.29e-05	8.23e-05	2.99e-05
Mesoplasma_florum	0.000145681	2.7e-05	9.6e-05	5.94e-05	0.000127771	9.71e-05	0.000248504	7.17e-05	0.000222349	0.00010285	3.92e-05	3.81e-05	5.72e-05	0.000204916	7.78e-05	0.000314197	0.000113011	3.94e-05	0.000118344	1.67e-05	1.98e-05	5.33e-05	0.00011031	5.6e-05	3.28e-05	1.28e-05	3.75e-05	8.18e-05	2.32e-05	0.000115902	5.42e-05	2.39e-05	0.000131389	2.08e-05	0.000102987	0.000131677	7.85e-06	2.89e-05	4.47e-06	8.43e-05	8.06e-05	5.86e-05	0.000219259	1.25e-05	2.07e-05	0.000105285	9.26e-05	2.85e-05
Mesorhizobium_australicum	5.75e-05	2.19e-05	1.89e-05	1.63e-05	5.33e-05	1.94e-05	4.6e-05	1.7e-05	3.48e-05	1.73e-05	6.02e-05	1.74e-05	8.2e-06	3.15e-05	2.15e-05	9.8e-06	1.75e-05	3.54e-05	2.88e-05	3.12e-05	5.15e-05	2.62e-05	3.07e-05	1.15e-05	2.68e-05	7.32e-05	1.59e-05	3.5e-05	4.08e-05	4.13e-05	2.04e-05	3.52e-05	2.78e-05	1.28e-05	3.43e-05	9.51e-05	1.63e-05	1.18e-05	7e-06	4.68e-05	3.79e-05	2.83e-05	2.4e-05	1.01e-05	2.08e-05	2.59e-05	4.42e-05	3.47e-05
Mesorhizobium_ciceri	8.28e-05	4.5e-05	4.23e-05	2.42e-05	6.67e-05	4.34e-05	8.86e-05	9.35e-05	8.88e-05	5.11e-05	8.28e-05	5.02e-05	2.64e-05	7.41e-05	4.25e-05	5.5e-05	3.43e-05	8.04e-05	3.48e-05	4.79e-05	8.38e-05	4.64e-05	4.15e-05	1.62e-05	5.22e-05	0.000103257	2.4e-05	4.82e-05	6.28e-05	3.15e-05	3.76e-05	6.66e-05	4.92e-05	5.56e-05	5.39e-05	8.07e-05	2.49e-05	3.3e-05	1.73e-05	7.06e-05	2.11e-05	5.34e-05	6.1e-05	2.33e-05	4.61e-05	7.57e-05	9.49e-05	7.32e-05
Mesorhizobium_loti	5.91e-05	2.49e-05	3.55e-05	2.71e-05	7.75e-05	1.99e-05	0.000222267	2.78e-05	1.74e-05	1.82e-05	4.75e-05	1.55e-05	8.93e-06	7.16e-05	9.85e-06	0.000105095	8.33e-05	4.24e-05	1.82e-05	3.5e-05	2.2e-05	2.07e-05	7.66e-05	7.26e-06	1.92e-05	4.3e-05	1.37e-05	5.59e-06	2.43e-05	8.19e-06	2.22e-05	2.13e-05	1.72e-05	1.94e-05	1.92e-05	3.37e-05	1.85e-05	1.48e-05	1.93e-06	7.67e-05	1.46e-05	2.64e-05	1.76e-05	1.47e-05	1.97e-05	2.61e-05	5.89e-05	3.59e-05
Mesorhizobium_opportunistum	2.46e-05	4.86e-05	3.47e-05	1.58e-05	3.08e-05	2.71e-05	2.97e-05	4.32e-05	4.65e-05	2.54e-05	1.33e-05	2.33e-05	1.2e-05	6.91e-05	8.31e-06	3.32e-05	4.38e-05	3.94e-05	3.4e-05	3.18e-05	1.38e-05	2.47e-05	5.86e-05	7.53e-06	2.9e-05	3.72e-05	2.1e-05	3.98e-05	3.66e-05	1.45e-05	3.4e-05	1.82e-05	2.95e-05	1.78e-05	4.22e-05	0.000104901	1.97e-05	2.13e-05	1.28e-05	6.92e-05	3.73e-05	3.45e-05	2.81e-05	1.49e-05	1.9e-05	3.42e-05	6.41e-05	4.66e-05
Mesotoga_prima	2.4e-05	1.02e-05	1.14e-05	1.88e-06	1.31e-05	4.56e-06	7.43e-06	1.1e-05	7.47e-06	5.51e-06	1.21e-05	2.14e-06	3.28e-06	2.96e-05	0	4.63e-05	6.44e-06	1e-05	1.35e-05	6.44e-06	8.65e-06	1.38e-05	1.8e-05	1.78e-06	8.69e-06	8.36e-06	2.55e-06	0	5.5e-06	3.78e-06	1.33e-05	2.41e-05	1.26e-05	1.29e-05	1.11e-05	3.03e-05	4.14e-06	4.96e-06	3.62e-06	8.72e-07	9.74e-06	9.15e-06	1.16e-06	1.69e-05	4.34e-06	3.07e-06	2.6e-05	9.98e-06
Metallosphaera_cuprina	0	2.66e-07	0	0	0	1.2e-06	0	0	3.32e-06	1.44e-06	0	9.53e-07	0	0	6.15e-07	0	4.15e-07	0	5.2e-07	4.03e-07	6.18e-07	4.05e-07	0	5.48e-07	2.07e-07	0	0	0	4.63e-07	0	3.29e-07	3.34e-07	4.91e-07	1.27e-06	8.79e-07	3.22e-06	3.38e-07	0	0	3.78e-06	0	0	5.79e-07	5.5e-07	0	2.56e-07	6.29e-07	4.75e-07
Metallosphaera_sedula	6.32e-07	0	0	0	0	7.6e-07	0	5.5e-07	0	0	1.1e-06	0	0	0	0	0	0	0	0	0	0	6.08e-07	0	0	8.27e-07	0	0	0	0	0	3.76e-07	1.88e-07	0	0	1.76e-07	1.69e-06	2.53e-07	1.91e-07	0	1.16e-06	0	0	0	0	2.48e-07	0	5.66e-07	0
Methanobacterium_sp._AL-21	3.86e-05	1.03e-06	1.3e-06	2.19e-06	0	2.22e-06	1.49e-05	0	0	0	4.42e-06	1.67e-06	1.46e-06	7.41e-06	2.77e-06	0.000208557	7.48e-06	2e-06	0	5.84e-06	4.12e-07	3.45e-06	9.37e-07	5.48e-07	0	0	2.2e-06	0	1.21e-06	0	6.57e-07	5.07e-06	4.52e-06	7.79e-06	3.23e-06	5.08e-07	4.22e-07	1.05e-06	4.83e-07	0	0	0	2.89e-06	3.67e-07	1.86e-06	0	3.15e-07	4.75e-07
Methanobacterium_sp._SWAN-1	0	0	0	6.27e-07	1.67e-06	0	0	1.1e-06	9.96e-06	2.88e-06	2.21e-06	0	3.65e-07	9.88e-06	0	0	8.31e-07	0	0	0	0	3.65e-06	0	0	1.24e-06	1.65e-06	1.59e-06	2.8e-06	2.31e-07	4.72e-06	2.35e-07	7.31e-07	7.86e-06	0	1.23e-06	2.3e-05	0	9.54e-07	9.66e-07	0	2.16e-06	1.25e-06	0	0	4.34e-06	1.4e-05	2.45e-06	0
Methanobrevibacter_ruminantium	6.1e-05	8.39e-06	3.32e-05	1.11e-05	5.03e-05	1.18e-05	1.63e-05	7.15e-06	2.49e-05	6.95e-06	1.21e-05	1.45e-05	2.22e-05	3.83e-05	2.34e-05	4.19e-05	2.93e-05	2.28e-05	2.7e-05	2.72e-05	1.5e-05	2.03e-05	3.11e-05	1.74e-05	1.12e-05	1.72e-05	1.59e-05	1.05e-05	2.07e-05	3.72e-05	2.24e-05	1.45e-05	2.54e-05	1.32e-05	2.95e-05	1.97e-05	8.78e-06	4.96e-06	1.45e-05	1.45e-05	3.19e-05	1.7e-05	6.94e-06	2.68e-05	1e-05	5.51e-06	4.16e-05	1.5e-05
Methanobrevibacter_smithii	0	1.66e-06	8.35e-06	1.46e-06	0	1.01e-06	0	3.57e-05	4.56e-06	4.08e-06	9.94e-06	3.57e-06	4.01e-06	0	4.71e-05	2.78e-05	1.16e-05	4.8e-06	3.47e-06	3.62e-06	0	8.31e-06	1.05e-05	2.6e-06	6.1e-06	2.53e-07	1.41e-06	0	8.1e-07	0	1.03e-06	3.47e-06	4.22e-06	4.89e-06	1.07e-05	1.37e-05	0	2.48e-06	0	2.91e-06	7.03e-06	0	0	3.67e-07	0	0	2.39e-06	6.41e-06
Methanobrevibacter_sp._AbM4	3.48e-06	2.2e-06	3.8e-06	4.18e-07	7.5e-06	1.84e-06	1.63e-05	2.36e-05	2.12e-05	1.37e-05	1.77e-05	3.81e-06	2.01e-06	0	1.11e-05	2.23e-05	1.2e-05	1.2e-06	6.93e-07	8.05e-07	1.44e-06	1.11e-05	3.51e-06	1.78e-06	5.17e-06	2.79e-06	4.58e-06	5.59e-06	6.94e-07	1.89e-06	6.2e-06	1.42e-06	1.05e-05	2.17e-06	4.53e-06	2.51e-05	1.69e-07	2.96e-06	4.83e-07	4.65e-06	3.25e-06	1.25e-06	1.74e-06	4.4e-06	1.49e-06	1.36e-05	2.89e-06	1.66e-06
Methanocaldococcus_fervens	7.58e-06	0	6.51e-07	0	3.89e-06	0	5.94e-06	3.3e-06	1.49e-05	2.64e-06	0	0	0	1.11e-05	0	0	1.25e-06	0	0	0	0	4.66e-06	2.11e-06	0	0	0	2.64e-06	0	0	3.78e-06	1.41e-07	3.97e-07	1.08e-06	5.43e-07	7.38e-07	2.51e-05	0	3.15e-06	0	0	0	0	0	0	1.74e-06	2.4e-05	1.32e-06	0
Methanocaldococcus_infernus	6.32e-07	1.03e-06	0	0	0	1.27e-07	0	0	0	0	0	4.76e-07	0	0	0	0	8.31e-07	0	0	0	0	0	0	0	3.21e-06	5.07e-07	1.76e-07	0	1.74e-07	0	9.39e-08	1.67e-07	0	2.72e-07	1.76e-07	1.19e-06	0	0	0	0	0	0	0	0	2.48e-07	0	0	0
Methanocaldococcus_jannaschii	0	0	0	0	0	0	0	0	0	0	0	0	0	0	0	9.8e-06	0	0	0	0	0	4.05e-07	0	0	0	0	0	0	0	0	0	8.35e-08	7.86e-07	0	8.08e-07	0	5.06e-07	0	0	1.16e-06	2.16e-06	0	0	0	2.48e-07	1.28e-06	6.29e-07	0
Methanocaldococcus_sp._FS406-22	1.26e-06	0	4.34e-07	0	0	0	0	1.1e-06	0	2.4e-06	0	0	0	0	1.54e-06	8.17e-06	5.82e-06	0	4.16e-06	0	0	2.84e-06	1.41e-06	0	3e-06	0	0	0	0	0	0	0	1.96e-06	1.81e-07	4.92e-07	0	0	0	0	0	3.79e-06	0	5.79e-07	0	2.48e-06	0	3.15e-07	0
Methanocaldococcus_vulcanius	6.95e-06	2.4e-06	9.98e-06	2.93e-06	1.81e-05	1.65e-06	0.000279691	1.1e-05	0	4.79e-07	8.06e-05	9.53e-07	3.46e-06	7.96e-05	1.14e-05	1.52e-05	8.31e-07	5.8e-06	2.08e-06	1.83e-05	7.41e-06	1.05e-05	2.11e-05	2.47e-06	1.03e-06	2.53e-06	1.06e-06	0	4.63e-07	7.56e-06	1.75e-05	8.56e-07	0	1.48e-05	1.12e-05	4.58e-06	2.7e-06	5.73e-07	2.17e-06	4.07e-06	9.74e-06	5.61e-06	0	2.02e-06	1.98e-06	6.28e-06	3.89e-05	1.66e-06
Methanocella_arvoryzae	6.95e-06	8.22e-06	4.66e-06	7.63e-06	7.5e-06	1.36e-05	5.94e-06	1.26e-05	2.65e-05	2.71e-05	2.98e-05	1.5e-05	1.46e-06	2.1e-05	1.85e-06	2.78e-05	4.99e-06	2.42e-05	2.74e-05	1.05e-05	9.68e-06	8.11e-07	2.34e-05	3.7e-06	1.24e-05	9.38e-06	4.93e-06	5.59e-06	8.91e-06	1.89e-06	1.38e-05	9.87e-06	1.32e-05	2.41e-05	2.66e-05	5.97e-05	1.51e-05	7.35e-06	5.68e-06	2.76e-05	1.89e-05	9.77e-06	2.31e-05	1.23e-05	1.76e-05	5.76e-06	2.55e-05	1.02e-05
Methanocella_conradii	9.8e-06	5.96e-06	9.33e-06	9.4e-07	6.94e-06	8.17e-06	0.000103461	1.54e-05	1.83e-05	8.15e-06	4.75e-05	1.29e-05	1.2e-05	6.11e-05	4.31e-06	1.14e-05	1.64e-05	1.12e-05	8.66e-06	8.66e-06	1.15e-05	1.11e-05	1.1e-05	1.18e-05	6.93e-06	1.08e-05	1.48e-05	1.47e-05	1.71e-05	7.56e-06	1.52e-05	6.89e-06	9.13e-06	1.96e-05	1.59e-05	2.02e-05	7.59e-06	7.73e-06	7.61e-06	3.49e-05	1.95e-05	1.04e-05	4.05e-06	5.5e-06	1.09e-05	3.46e-06	2.5e-05	1.28e-05
Methanocella_paludicola	6e-06	1.86e-05	3.8e-06	1.04e-06	1e-05	1.37e-05	1.53e-05	6.6e-06	2.32e-05	2.81e-05	0	6.43e-06	7.11e-06	1.91e-05	3.69e-06	5.45e-06	1.08e-05	2.72e-05	8.66e-06	2.19e-05	4.53e-06	1.07e-05	2.74e-05	2.74e-07	1e-05	3.21e-05	7.14e-06	2.8e-06	1.42e-05	1.35e-05	1.22e-05	1.15e-05	1.76e-05	6.34e-06	1.82e-05	3.64e-05	8.69e-06	1.67e-05	1.93e-06	2.18e-05	3.62e-05	1.31e-05	8.68e-06	9.72e-06	1.19e-05	1.55e-05	1.98e-05	2.76e-05
Methanococcoides_burtonii	0	8.98e-07	7.59e-07	4.18e-07	8.33e-07	5.7e-07	8.91e-06	0	8.71e-06	0	3.31e-06	9.53e-07	0	0	5.23e-06	2.18e-06	4.15e-07	2.4e-06	0	0	1.24e-06	0	7.03e-07	2.74e-07	8.27e-07	0	1.94e-06	0	1.39e-06	0	8.92e-07	1.23e-06	3.54e-06	2.44e-06	2.36e-06	8.47e-06	5.91e-07	5.73e-07	4.83e-07	2.32e-06	2.16e-06	2.49e-06	0	1.1e-06	1.24e-06	3.07e-06	5.22e-06	0
Methanococcus_aeolicus	0	5.99e-07	0	0	3.61e-06	3.04e-06	0	5.5e-07	4.98e-06	5.75e-06	1.66e-06	4.76e-07	8.02e-06	3.09e-06	1.85e-06	2.18e-06	2.49e-06	4e-07	6.93e-07	0	6.18e-07	2.64e-06	0	6.85e-07	4.14e-07	0	2.11e-06	0	8.1e-07	0	0	1.57e-06	1.18e-06	3.62e-07	7.38e-07	3.39e-07	1.69e-07	1.91e-07	3.62e-07	1.16e-06	0	0	0	0	0	1.02e-06	1.26e-06	0
Methanococcus_maripaludis	7.27e-06	5.19e-06	1.19e-05	1.88e-06	2.69e-05	1.05e-05	0	9.9e-06	0	1.7e-05	3.31e-06	1.26e-05	3.83e-06	1.11e-05	8.62e-06	4.36e-05	1.7e-05	5.8e-06	2.39e-05	4.03e-06	3.09e-06	8.51e-06	1.41e-06	7.95e-06	5.27e-06	0	2.29e-06	2.8e-06	4.45e-06	1.89e-06	1.28e-05	9.77e-06	5.6e-06	6.34e-06	1.86e-05	2.25e-05	1.15e-05	1.17e-05	7.12e-06	1.37e-05	6.28e-05	3.08e-05	2.2e-05	1.21e-05	1.1e-05	4.61e-06	1.66e-05	2.16e-05
Methanococcus_vannielii	6e-06	1.23e-06	6.72e-06	0	8.33e-07	5.76e-06	0	2.86e-05	6.97e-05	5.75e-06	0	2.95e-05	2.19e-06	1.23e-05	6.95e-05	4.36e-06	4.78e-06	3.6e-06	6.76e-06	5.03e-06	4.74e-06	1.82e-06	1.64e-05	1.23e-05	6.41e-06	1.14e-06	6.34e-06	0	2.37e-06	1.83e-05	4.55e-06	4.13e-06	2.85e-06	6.16e-06	1.02e-05	1.39e-05	6.24e-06	9.54e-07	1.09e-06	1.8e-05	3.68e-05	9.35e-06	1.74e-06	0	5.21e-06	6.66e-06	1.17e-05	2.11e-05
Methanococcus_voltae	2.46e-05	1.33e-06	7.05e-06	2.72e-06	5.56e-07	5.26e-06	3.07e-05	4.04e-05	7.59e-05	1.49e-05	2.93e-05	1.95e-05	3.65e-07	6.17e-06	7.72e-05	2.72e-05	0.000120905	1.02e-05	2.76e-05	7.85e-06	1.48e-05	1.18e-05	2.65e-05	7.26e-06	2.08e-05	4.81e-06	4.76e-06	0.000134925	1e-05	5.89e-05	1.14e-05	1.73e-06	1.83e-05	4.44e-06	3.22e-05	8.64e-06	1.65e-05	5.63e-06	7.25e-07	2.91e-06	2.43e-05	1.31e-05	0	1.65e-06	5.21e-06	4.23e-06	6.16e-06	1.43e-05
Methanocorpusculum_labreanum	3.79e-05	1.1e-05	1.2e-05	1.21e-05	2.08e-05	4.37e-06	1.34e-05	3.3e-06	1.08e-05	1.77e-05	2.1e-05	1.79e-05	2.52e-05	4.94e-06	1.26e-05	2.07e-05	2.08e-05	2.44e-05	1.96e-05	2.98e-05	1.34e-05	1.66e-05	1.26e-05	1.21e-05	1.4e-05	2.04e-05	9.34e-06	2.52e-05	1.06e-05	8.82e-06	1.45e-05	1.49e-05	6.97e-06	2.26e-05	6.08e-06	3.76e-05	8.02e-06	5.34e-06	1.04e-05	2.27e-05	1.35e-05	1.39e-05	1.48e-05	4.04e-06	1.6e-05	8.2e-06	3.98e-05	2.02e-05
Methanoculleus_bourgensis	1.45e-05	1.58e-05	2.16e-05	7.42e-06	3.97e-05	1.39e-05	4.85e-05	1.24e-05	2.41e-05	1.85e-05	3.7e-05	3.98e-05	5.65e-06	0.000110482	3.69e-06	2.23e-05	2.37e-05	3.14e-05	3.24e-05	1.93e-05	1.42e-05	1.4e-05	2.01e-05	6.03e-06	1.51e-05	4.02e-05	7.4e-06	3.64e-05	1.35e-05	1.64e-05	1.74e-05	1.15e-05	2.07e-05	1.1e-05	3.15e-05	5.3e-05	1.46e-05	4.13e-05	3.26e-06	8.28e-05	6.28e-05	4.49e-05	3.64e-05	2.55e-05	1.05e-05	1.95e-05	5.33e-05	2.45e-05
Methanoculleus_marisnigri	4.77e-05	2e-05	2.28e-05	8.25e-06	2.97e-05	2.74e-05	3.17e-05	3.74e-05	5.23e-05	2.83e-05	5.63e-05	3.52e-05	1.08e-05	4.26e-05	1.85e-05	1.25e-05	9.97e-06	5.28e-05	1.56e-05	3.18e-05	2.43e-05	2.31e-05	3.02e-05	1.16e-05	2.11e-05	2e-05	8.81e-06	3.01e-05	4.32e-05	3.4e-05	2.32e-05	2.52e-05	2.68e-05	3.08e-05	3.3e-05	8.49e-05	1.46e-05	2.86e-05	1.57e-06	5.17e-05	2e-05	3.85e-05	2.83e-05	1.61e-05	2.8e-05	4.32e-05	5.42e-05	4.09e-05
Methanohalobium_evestigatum	2.53e-06	7.32e-07	1.64e-05	2.51e-06	1.11e-06	5.19e-06	2.97e-06	1.81e-05	0	9.83e-06	7.73e-06	9.53e-07	2.92e-06	6.17e-06	0	2.18e-06	4.57e-06	1.2e-06	4.16e-06	8.05e-07	1.79e-05	1.07e-05	0	0	1.16e-05	1.52e-06	0	0	0	0	7.91e-06	5.85e-07	1.18e-06	1.09e-06	7.73e-07	2.88e-06	2.03e-06	0	2.17e-06	0	1.3e-05	2.91e-06	0	3.3e-06	7.44e-07	1.02e-06	7.05e-06	9.5e-07
Methanohalophilus_mahii	4.74e-06	7.75e-06	1.1e-05	1.78e-06	7.22e-06	1.03e-05	1.58e-05	6.05e-06	4.15e-06	1.94e-05	9.94e-06	9.76e-06	5.29e-06	1.79e-05	3.38e-06	2.07e-05	6.44e-06	4.8e-06	1.18e-05	7.25e-06	1.03e-05	9.33e-06	1.48e-05	3.84e-06	1.42e-05	5.83e-06	1.94e-06	2.8e-06	8.27e-06	2.52e-06	1.15e-05	2.9e-06	8.74e-06	1.79e-05	1.94e-05	3.97e-05	1.05e-05	6.3e-06	1.09e-06	6.13e-05	2.06e-05	1.52e-05	4.92e-06	4.95e-06	6.82e-06	7.81e-06	2.47e-05	1.07e-05
Methanolobus_psychrophilus	5.69e-06	4.19e-06	8.68e-07	1.88e-06	4.39e-05	7.86e-06	1.29e-05	8.52e-06	9.96e-06	1.32e-05	0	1.52e-05	3.1e-06	6.91e-05	6.46e-06	1.58e-05	3.97e-05	1.08e-05	4.16e-06	7.65e-06	2.59e-05	1.16e-05	1.19e-05	1.36e-05	1.34e-06	2.28e-06	1.32e-06	6.99e-06	5.03e-06	1.32e-05	1e-05	7.83e-06	4.62e-06	8.96e-06	1.58e-05	2.88e-05	1.79e-05	1.72e-06	3.02e-06	1.86e-05	5.95e-06	2.49e-06	3.3e-05	2.5e-05	2.41e-05	4.48e-06	6.79e-06	1.76e-05
Methanomethylovorans_hollandica	6.57e-05	1.23e-06	3.1e-05	2.3e-06	0.000101661	4.62e-06	0.000192071	3.16e-05	1.66e-06	1.25e-05	2.21e-06	3e-05	1.71e-05	7.41e-06	0.00015015	2.18e-06	6.44e-05	1.22e-05	4.44e-05	3.14e-05	3.29e-06	1.68e-05	1.9e-05	1.03e-05	7.86e-06	2.03e-06	3.08e-06	0.000197144	1.1e-05	1.26e-06	2.93e-05	0.000101476	7.86e-07	3.53e-06	1.48e-06	1.08e-05	4.05e-06	6.39e-06	2.29e-06	2.99e-05	2.33e-05	2.49e-05	2.89e-06	1.3e-05	2.48e-07	1.26e-05	1.67e-05	1.4e-05
Methanoplanus_petrolearius	0.000183602	1.59e-05	4.08e-05	1.22e-05	4.78e-05	1.67e-05	0.000164349	4.32e-05	0	4e-05	4.86e-05	4.38e-05	0.000218218	3.46e-05	0.000155688	7.73e-05	0.00016827	3.3e-05	0.000115398	6.89e-05	4.84e-05	1.42e-05	7.4e-05	5.06e-05	3.01e-05	0.000117067	0.000187554	0.000103466	0.000103151	5.67e-05	2.99e-05	6.66e-05	8.42e-05	8.86e-05	1.18e-05	7.32e-05	4.99e-05	3.17e-05	8.26e-05	1.86e-05	0.000118481	2.93e-05	8.97e-06	6.61e-05	5.63e-05	3.27e-05	9.02e-05	3.35e-05
Methanopyrus_kandleri	0	1.46e-06	4.34e-07	5.22e-07	0	1.27e-07	6.44e-06	0	0	9.59e-07	9.94e-06	0	0	1.42e-05	0	0	0	0	1.39e-06	0	4.12e-07	8.11e-07	0	0	0	0	7.93e-07	0	2.49e-06	0	2.09e-06	1.29e-06	5.89e-07	1.81e-07	1.55e-06	4.75e-06	0	1.43e-06	7.25e-07	5.81e-07	0	1.25e-06	8.68e-07	0	7.44e-07	0	4.4e-07	0
Methanoregula_boonei	1.9e-06	3.79e-06	1.41e-06	4.18e-07	2.78e-06	5.45e-06	4.95e-06	1.92e-06	7.88e-06	8.15e-06	4.42e-06	6.19e-06	4.56e-06	1.23e-05	6.15e-07	1.14e-05	3.74e-06	0	2.77e-06	2.01e-06	1.65e-06	1.22e-06	4.92e-06	2.74e-06	3.52e-06	2.53e-07	1.23e-06	4.19e-06	4.57e-06	0	6.74e-06	2.76e-06	8.05e-06	6.34e-06	1.21e-05	1.98e-05	6.08e-06	5.63e-06	0	2.38e-05	1.14e-05	1.25e-06	7.52e-06	5.69e-06	3.84e-06	8.58e-06	1.37e-05	5.23e-06
Methanoregula_formicica	3.16e-06	1.03e-05	4.01e-06	9.4e-07	1.67e-06	8.49e-06	2.97e-06	1.1e-06	1.37e-05	7.19e-06	1.21e-05	7.38e-06	1.48e-05	2.16e-05	2.46e-06	4.36e-06	1.04e-05	4e-06	9.18e-06	3.02e-06	8.23e-07	5.68e-06	4.22e-06	0	6.31e-06	3.29e-06	2.55e-06	0	5.9e-06	1.26e-06	7.68e-06	6.85e-06	8.05e-06	6.7e-06	1.54e-05	2.8e-05	6.58e-06	3.63e-06	4.59e-06	3.08e-05	7.57e-06	8.52e-06	8.97e-06	8.81e-06	9.05e-06	3.46e-06	1.79e-05	1.12e-05
Methanosaeta_concilii	2.21e-06	9.48e-06	2.39e-06	3.87e-06	1.11e-06	5.13e-06	4.46e-06	1.02e-05	8.3e-07	1.56e-05	2.32e-05	4.72e-05	0.000248298	2.35e-05	1.85e-06	1.63e-06	2.43e-05	8.6e-06	1.21e-05	0	1.5e-05	0	7.03e-06	2.47e-06	1.17e-05	6.68e-05	0.000154078	4.19e-06	2.63e-05	1.23e-05	1.57e-05	7.06e-06	1.7e-05	7.89e-05	6.36e-06	1.69e-05	1.43e-05	1.53e-05	3.88e-05	1.16e-05	7.57e-06	3.95e-06	1.76e-05	3.69e-05	1.59e-05	1.2e-05	6.41e-05	2.85e-06
Methanosaeta_harundinacea	2.69e-05	2.06e-05	1.01e-05	1.12e-05	4.47e-05	2.77e-05	4.46e-05	1.02e-05	4.15e-05	1.39e-05	2.65e-05	2.55e-05	7.29e-07	0.000125295	1.23e-05	1.85e-05	2.2e-05	5.48e-05	1.65e-05	1.39e-05	1.67e-05	3.87e-05	2.65e-05	5.75e-06	1.05e-05	1.19e-05	1.66e-05	6.99e-06	1.24e-05	1.64e-05	2.15e-05	1.45e-05	2.82e-05	2.23e-05	4.27e-05	0.000120153	2.66e-05	3.56e-05	1.22e-05	0.000162154	2.06e-05	7.32e-05	2.46e-05	2.75e-05	3.78e-05	2.54e-05	5.24e-05	3.23e-05
Methanosaeta_thermophila	6.64e-06	4.49e-06	1.3e-06	3.34e-06	2.22e-06	8.43e-06	3.96e-06	1.1e-06	6.64e-06	1.22e-05	3.31e-06	8.57e-06	7.29e-07	1.05e-05	4.31e-06	3.27e-06	9.14e-06	0	4.16e-06	4.03e-06	1.65e-06	2.43e-06	2.34e-06	4.11e-06	2.28e-06	0	1.76e-06	0	3.47e-06	1.89e-06	5.02e-06	7.31e-07	2.95e-06	9.51e-06	1.11e-05	2.12e-05	6.84e-06	5.73e-07	0	2.18e-05	3.25e-06	6.24e-07	1.33e-05	1.47e-06	8.31e-06	3.33e-06	5.22e-06	4.28e-06
Methanosalsum_zhilinae	7.27e-06	2.7e-06	1.08e-06	0	8.33e-07	5.89e-06	9.9e-06	4.67e-06	0	1.15e-05	1.1e-06	3.57e-06	1.46e-06	0	8.62e-06	2.29e-05	8.93e-06	1.4e-06	1.23e-05	3.62e-06	8.44e-06	8.11e-07	3.28e-06	9.59e-07	4.45e-06	5.7e-06	7.05e-07	1.33e-05	6.42e-06	0	1.05e-05	1.5e-06	5.2e-06	1.33e-05	1.21e-05	2.49e-05	8.27e-06	0	0	7.56e-06	2.92e-05	8.94e-06	9.26e-06	0	6.82e-06	2.56e-06	1.35e-05	1.66e-06
Methanosarcina_acetivorans	6.32e-06	2.1e-06	3.04e-06	0	5.56e-07	4.5e-06	9.9e-07	1.92e-06	1.62e-05	1.25e-05	0	7.62e-06	9.12e-07	0	6.15e-06	8.71e-06	2.83e-05	3.6e-06	6.76e-06	3.22e-06	8.23e-06	4.48e-05	1.92e-05	1.37e-06	3.1e-06	0	0.000307892	4.19e-06	3.41e-06	0	3.33e-06	0	6.28e-06	5.89e-06	1.72e-05	2.14e-05	4.64e-06	3.05e-06	4.83e-07	6.97e-06	2.71e-06	1.66e-06	6.65e-06	6.61e-06	4.96e-07	2.95e-06	8.24e-06	2.38e-06
Methanosarcina_barkeri	0	1.53e-06	3.9e-06	0	1.67e-06	6.97e-07	2.97e-06	1.51e-05	0	4.79e-06	3.31e-06	3.1e-06	3.83e-06	2.47e-06	1.11e-05	1.09e-05	3.45e-05	4.8e-06	1.56e-06	5.03e-06	7e-06	0	1.08e-05	3.42e-06	5.17e-07	6.33e-07	4.4e-06	0	1.62e-06	6.3e-07	1.78e-06	8.22e-06	1.01e-05	4.53e-06	4.78e-06	8.47e-07	1.27e-06	1.43e-06	2.17e-06	0	1.24e-05	5.4e-06	8.68e-07	1.1e-06	7.44e-07	0	6.16e-06	2.38e-06
Methanosarcina_mazei	0	5.72e-06	1.84e-06	6.27e-07	0.00010805	7.67e-06	1.09e-05	1.84e-05	3.48e-05	4.32e-06	8.28e-06	2.24e-05	5.47e-07	7.41e-06	2.31e-05	9.8e-06	0.000202962	8.4e-06	3.81e-06	9.87e-06	5.35e-06	1.18e-05	1.57e-05	0.000595922	1.75e-05	2.53e-07	1.76e-06	3.5e-06	3.59e-06	0.000370068	4.74e-05	6.81e-06	9.62e-06	1.39e-05	3.19e-05	5.85e-05	7.76e-06	2.29e-06	0	1.54e-05	0.00017637	3.51e-05	2.81e-05	2.2e-06	9.3e-06	2.95e-06	1.17e-05	1.43e-06
Methanosphaera_stadtmanae	2.84e-06	4.33e-07	4.99e-06	4.18e-06	3.61e-06	1.13e-05	4.95e-06	3.6e-05	1.08e-05	2.73e-05	4.42e-06	9.53e-07	0	1.42e-05	1.42e-05	1.31e-05	8.31e-07	1.8e-06	1.61e-05	1.01e-06	1.44e-06	1.42e-06	9.84e-06	8.22e-07	3.52e-06	6.08e-06	0	0	3.47e-07	6.3e-06	7.23e-06	3.36e-06	2.85e-06	2.9e-06	5.66e-06	1.68e-05	1.69e-07	3.53e-06	0	9.01e-06	3.25e-06	5.82e-06	0	5.5e-07	6.82e-06	6.4e-07	5.28e-06	0
Methanosphaerula_palustris	4.42e-06	3.73e-06	7.05e-06	1.19e-05	3.33e-06	9.5e-06	1.88e-05	4.95e-06	5.68e-05	1.15e-05	1.88e-05	1.5e-05	8.2e-06	2.9e-05	9.23e-06	1.2e-05	2.35e-05	1.6e-06	7.8e-06	2.62e-06	4.94e-06	9.93e-06	1.1e-05	7.81e-06	1.24e-05	3.07e-05	2.19e-05	2.94e-05	1.14e-05	1.26e-06	5.73e-06	1.34e-05	4.42e-06	2.68e-05	1.96e-05	4.52e-05	5.32e-06	2.39e-06	1.12e-05	2.5e-05	1.35e-05	9.98e-06	1.19e-05	9.91e-06	2.24e-05	5.12e-06	9.62e-06	2.14e-06
Methanospirillum_hungatei	5.12e-05	5.29e-06	2.47e-05	9.93e-06	3.36e-05	1.95e-05	2.28e-05	1.9e-05	2.65e-05	1.2e-05	3.37e-05	2.81e-05	7.84e-06	2.59e-05	3.45e-05	1.91e-05	1.47e-05	5.8e-05	1.32e-05	3.32e-05	2.86e-05	1.38e-05	3.14e-05	9.04e-06	6e-06	1.77e-06	1.26e-05	1.33e-05	3.7e-05	2.83e-05	8.31e-06	1.44e-05	3e-05	1.38e-05	1.38e-05	5.73e-05	9.37e-06	6.01e-06	4.11e-06	1.51e-05	1.68e-05	1.56e-05	7.52e-06	1.08e-05	9.67e-06	2.27e-05	5.64e-05	3.45e-05
Methanothermobacter_marburgensis	0	1.66e-06	2.17e-06	0	0	2.98e-06	0	2.2e-06	7.05e-06	2.88e-06	6.63e-06	2.86e-06	0	0	2.46e-06	1.09e-06	0	8e-07	0	1.21e-06	1.24e-06	0	2.58e-06	0	4.14e-07	7.6e-07	0	0	1.27e-06	0	3.12e-06	0	2.36e-06	3.26e-06	5.73e-06	1.66e-05	3.04e-06	8.59e-07	0	1.69e-05	0	1.66e-06	4.63e-06	0	1.98e-06	1.79e-06	2.64e-06	9.5e-07
Methanothermobacter_thermautotrophicus	0	1.6e-06	0	1.88e-06	4.17e-06	3.17e-06	3.96e-06	0	7.47e-06	3.84e-06	5.52e-06	1.91e-06	3.83e-06	1.23e-06	0	8.71e-06	1.25e-06	0	0	4.03e-07	2.06e-06	0	1.87e-06	5.48e-07	9.31e-07	3.8e-07	6.17e-07	0	1.5e-06	0	2.21e-06	1.44e-06	3.54e-06	3.98e-06	7.21e-06	1.59e-05	4.3e-06	2.86e-07	0	3.78e-06	0	4.16e-07	1.74e-06	4.04e-06	4.71e-06	5.12e-07	1.51e-06	7.13e-07
Methanothermococcus_okinawensis	0	4.99e-07	0	3.13e-07	5.56e-07	0	0	1.15e-05	0	0	0	0	0	0	1.54e-06	0	6.02e-06	0	0	8.05e-07	8.23e-07	4.05e-07	2.81e-06	0	3.52e-06	0	2.03e-06	4.19e-06	0	0	9.62e-07	1.25e-07	1.18e-06	0	7.03e-08	2.54e-06	0	0	0	1.89e-05	0	1.25e-06	0	0	0	0	0	0
Methanothermus_fervidus	0	2e-07	0	0	0	5.07e-07	0	1.1e-06	0	0	0	0	0	0	0	0	0	0	0	0	0	0	0	0	4.14e-07	0	2.64e-07	0	0	1.26e-06	2.82e-07	9.39e-07	4.91e-06	0	2.81e-07	1.36e-06	0	0	0	0	0	0	0	0	2.36e-06	0	3.77e-07	0
Methanotorris_igneus	1.26e-06	1.46e-06	3.25e-07	0	4.72e-06	1.84e-06	9.9e-07	2.2e-06	0	4.79e-07	4.42e-06	4.76e-07	0	8.64e-06	0	0	2.49e-06	0	3.47e-07	1.21e-06	1.03e-06	1.62e-06	1.64e-06	0	2.07e-07	0	0	0	0	0	3.15e-06	4.18e-08	2.26e-06	2.63e-06	2.85e-06	8.64e-06	2.53e-07	0	0	1.16e-06	0	2.29e-06	0	0	0	1.02e-06	2.26e-06	0
Methylacidiphilum_infernorum	9.54e-05	9.32e-06	4.72e-05	1.92e-05	0.000101939	2.92e-05	7.57e-05	2.5e-05	1.49e-05	2.23e-05	6.63e-05	3.02e-05	1.93e-05	0.000120974	6.68e-05	3.05e-05	7.98e-05	0.000127777	6.88e-05	9.12e-05	4.57e-05	3.53e-05	7e-05	4.9e-05	1.44e-05	2.53e-06	1.49e-05	2.8e-05	5.45e-05	3.97e-05	1.75e-05	2.23e-05	4.82e-05	1.42e-05	2.14e-05	0.000123203	1.33e-05	1.17e-05	5.55e-06	3.25e-05	0.000146614	3.47e-05	9.26e-06	2.05e-05	2.29e-05	4.29e-05	0.000124492	6.44e-05
Methylibium_petroleiphilum	9.83e-05	3.41e-05	5.02e-05	5.84e-05	8.92e-05	7.15e-05	7.03e-05	5.64e-05	5.43e-05	4.03e-05	5.25e-05	4.17e-05	2.46e-05	0.000121591	3.78e-05	6.81e-05	6.79e-05	0.000141974	3.27e-05	6.38e-05	5.17e-05	4.16e-05	8.2e-05	1.26e-05	4.17e-05	4.02e-05	3.11e-05	5.52e-05	7.17e-05	3.18e-05	3.5e-05	6.42e-05	6.19e-05	3.4e-05	8.38e-05	0.000185398	1.33e-05	3.28e-05	1.74e-05	0.000117983	2.11e-05	4.63e-05	3.91e-05	3.3e-05	5e-05	9.99e-05	0.00012229	9.03e-05
Methylobacillus_flagellatus	9.48e-05	2.91e-05	3.68e-05	2.62e-05	9.92e-05	0.000100408	0.000234643	0.000133599	0.00037708	7.05e-05	0.000186632	3.02e-05	5.63e-05	0.000353664	2.83e-05	2.94e-05	2.43e-05	3.68e-05	3.43e-05	3.3e-05	6.26e-05	4.4e-05	6.18e-05	2.92e-05	3.39e-05	5.68e-05	5.13e-05	3.36e-05	9.45e-05	4e-05	0.000221901	4.44e-05	5.54e-05	8.07e-05	6.75e-05	0.000228952	3.14e-05	3.5e-05	1.59e-05	9.27e-05	7.09e-05	7.59e-05	3.01e-05	3.43e-05	0.000131345	3.39e-05	9.54e-05	4.54e-05
Methylobacterium_extorquens	0.000117556	8.34e-05	8.05e-05	4.68e-05	0.000160269	7.62e-05	0.000243554	0.000123703	0.000209489	0.000106446	0.000184423	9.33e-05	8.62e-05	0.000238862	6.03e-05	6.26e-05	9.04e-05	0.000175168	0.000138443	7.47e-05	0.000108495	8.31e-05	0.000124362	2.84e-05	0.000103308	0.000149502	4.01e-05	0.000113253	0.000109631	7.31e-05	0.000119963	0.000118156	0.00010193	9.72e-05	0.000130052	0.000166757	4.92e-05	7.18e-05	4e-05	0.000168257	0.000123351	0.000133435	9.83e-05	7.98e-05	0.000121299	0.000118349	0.00017337	0.000150158
Methylobacterium_nodulans	0.000445258	7.67e-05	8.99e-05	9.87e-05	0.00018999	7.47e-05	0.000148508	0.000100336	0.000104952	9.3e-05	0.000467132	8.67e-05	2.28e-05	8.33e-05	0.000148919	2.67e-05	8.35e-05	0.000303345	8.59e-05	0.000124636	0.000230167	9.55e-05	0.000160196	4.26e-05	2.89e-05	7.83e-05	3.66e-05	3.22e-05	0.000124846	0.000104249	5.25e-05	0.000105171	5.91e-05	4.77e-05	5.53e-05	0.000259117	3.36e-05	6.28e-05	1.51e-05	0.000148206	6.17e-05	9.46e-05	4.31e-05	4.4e-05	4.85e-05	7.11e-05	0.000208534	0.000201002
Methylobacterium_populi	0.000104283	2.43e-05	4.04e-05	3.67e-05	6.36e-05	3.07e-05	4.01e-05	3.55e-05	2.12e-05	1.97e-05	9.66e-05	3.26e-05	2.68e-05	2.9e-05	5.66e-05	1.63e-05	3.64e-05	7.22e-05	2.22e-05	5.24e-05	0.00011776	2.66e-05	6.58e-05	1.3e-05	1.83e-05	4.41e-05	1.74e-05	6.01e-05	6.07e-05	2.99e-05	2.2e-05	4.1e-05	2.93e-05	1.65e-05	3.15e-05	0.000131168	2.24e-05	2.46e-05	3.86e-06	4.68e-05	5.09e-05	3.91e-05	6.07e-06	3.82e-05	2.84e-05	3.78e-05	9.4e-05	5.92e-05
Methylobacterium_radiotolerans	0.000207935	5.85e-05	7.23e-05	3.17e-05	0.000142214	6.35e-05	0.000221277	8.14e-05	0.000150998	9.64e-05	0.000154606	0.000103587	5.72e-05	0.000103692	7.35e-05	8.33e-05	0.000121944	0.000116379	0.000100497	9.22e-05	8.98e-05	8.72e-05	0.000152233	5.21e-05	6.9e-05	8.92e-05	4.95e-05	0.000118147	9.06e-05	9.67e-05	5.22e-05	9.44e-05	7.48e-05	8.56e-05	9.81e-05	0.000173874	4.95e-05	5.38e-05	2.22e-05	9.15e-05	8.66e-05	0.000108702	0.000103266	4.84e-05	0.000115718	0.000105797	0.000158524	0.000125923
Methylobacterium_sp._4-46	8.09e-05	4.24e-05	4.19e-05	2.16e-05	8.39e-05	3.99e-05	6.78e-05	5.36e-05	5.43e-05	3.14e-05	4.03e-05	5.83e-05	2.88e-05	4.94e-05	2.12e-05	3.16e-05	7.67e-05	0.00016537	7.03e-05	3.79e-05	3.62e-05	3.93e-05	0.000108671	1.3e-05	4.5e-05	3.95e-05	1.63e-05	2.45e-05	6.92e-05	3.15e-05	2.62e-05	4.47e-05	5.25e-05	4e-05	5.12e-05	0.000106087	1.92e-05	2.92e-05	1.26e-05	4.45e-05	5.63e-05	4.63e-05	3.15e-05	4.2e-05	3.7e-05	6.71e-05	9.25e-05	9.43e-05
Methylocella_silvestris	0.000101123	2.2e-05	3.86e-05	4.62e-05	7.75e-05	2.74e-05	5.2e-05	4.29e-05	2.45e-05	1.44e-05	6.46e-05	2.31e-05	6.2e-06	5.12e-05	2.4e-05	4.14e-05	1.93e-05	5.2e-05	4.12e-05	2.21e-05	7.21e-05	2.27e-05	8.24e-05	1.69e-05	3.22e-05	2.42e-05	9.95e-06	3.36e-05	2.5e-05	2.24e-05	2.15e-05	2.36e-05	1.49e-05	2.26e-05	2.99e-05	4.86e-05	2.37e-05	4.03e-05	9.66e-06	4.59e-05	6.76e-05	2.04e-05	1.5e-05	1.43e-05	1.9e-05	1.49e-05	6.52e-05	5.32e-05
Methylococcus_capsulatus	0.000182654	7.66e-05	0.000108438	5.9e-05	0.000186101	0.000101929	0.000271275	0.000192426	0.000146435	8.49e-05	0.000199884	0.000105492	7.37e-05	0.000214791	7.54e-05	2.99e-05	4.34e-05	0.000203163	6.6e-05	0.00015947	0.000103554	8.45e-05	0.000218747	3.16e-05	6.18e-05	6.97e-05	6.2e-05	4.89e-05	0.000199997	0.000109603	8.63e-05	9.84e-05	0.000119115	0.000116084	0.000121687	0.00042384	4.74e-05	4.19e-05	8.94e-06	8.6e-05	4.71e-05	0.000124913	0.000120332	7.76e-05	7.47e-05	0.000173297	0.000248857	0.000197438
Methylocystis_sp._SC2	0.000252808	4.85e-05	7.92e-05	0.000152329	0.000184712	9.01e-05	0.000168804	8.82e-05	3.4e-05	5.18e-05	0.000154606	5.69e-05	2.15e-05	0.000123443	8.62e-05	5.77e-05	3.57e-05	0.000162171	0.000125621	8.46e-05	0.000131553	6.32e-05	0.000153404	4.07e-05	0.000122646	4.9e-05	2.37e-05	2.31e-05	4.18e-05	6.58e-05	6.68e-05	6.76e-05	2.8e-05	2.7e-05	7.36e-05	7.76e-05	4.95e-05	2.49e-05	1.04e-05	8.25e-05	0.00010171	8.09e-05	2.89e-05	4.33e-05	3.94e-05	5.7e-05	0.000124429	0.00010953
Methylomicrobium_alcaliphilum	3e-05	1.3e-05	1.45e-05	3.49e-05	3.19e-05	1.81e-05	8.61e-05	1.04e-05	6.89e-05	2.35e-05	4.36e-05	9.76e-06	1.11e-05	4.2e-05	8.62e-06	2.4e-05	1.18e-05	3.72e-05	1.98e-05	1.23e-05	1.81e-05	1.09e-05	1.69e-05	1.08e-05	3.82e-05	2.31e-05	4.16e-05	1.54e-05	1.52e-05	2.83e-05	2.08e-05	1.89e-05	2.59e-05	2.49e-05	4.11e-05	6.58e-05	1.78e-05	1.7e-05	1.22e-05	1.54e-05	2.92e-05	3.33e-05	1.33e-05	1.54e-05	1.55e-05	5.8e-05	3.62e-05	1.43e-05
Methylomonas_methanica	7.84e-05	9.85e-06	2.61e-05	1.09e-05	7.03e-05	2.14e-05	0.000110886	2.31e-05	4.15e-05	1.08e-05	5.14e-05	9.76e-06	1.02e-05	5e-05	1.2e-05	9.26e-06	5.34e-05	2e-05	1.06e-05	3.14e-05	4.32e-05	1.66e-05	2.62e-05	8.63e-06	1.56e-05	9.5e-06	4.05e-06	5.52e-05	1.61e-05	4e-05	2.09e-05	2.16e-05	1.68e-05	1.18e-05	3.48e-05	6.95e-05	1.23e-05	3.03e-05	3.02e-06	5.17e-05	2.81e-05	1.27e-05	1.27e-05	2.35e-05	1.27e-05	1.11e-05	4.48e-05	1.16e-05
Methylophaga_sp._JAM1	4.58e-05	6.92e-06	1.18e-05	5.96e-06	3.61e-05	1.72e-05	5.64e-05	2.58e-05	1.58e-05	1.01e-05	5.47e-05	2.02e-05	2.02e-05	8.89e-05	5.2e-05	2.4e-05	5.51e-05	1.64e-05	4.51e-05	5.03e-06	1.38e-05	1.07e-05	1.12e-05	1.99e-05	8.07e-06	1.22e-05	6.08e-06	1.47e-05	9.03e-06	9.13e-06	1.4e-05	1.82e-05	1.59e-05	1.87e-05	1.27e-05	4.86e-05	9.7e-06	8.49e-06	1.06e-05	9.88e-06	3.52e-05	2.1e-05	8.68e-06	8.62e-06	1.08e-05	7.69e-06	2.03e-05	2.04e-05
Methylophaga_sp._JAM7	0.00023448	4.43e-06	4.77e-06	4.18e-06	0.000166935	4.88e-06	1.19e-05	3.02e-06	0	9.83e-06	7.73e-06	3.57e-05	3.65e-06	0	6.15e-07	0.000207468	3.68e-05	3.42e-05	2.11e-05	2.9e-05	2.06e-06	3.65e-06	3.98e-06	4.37e-05	9.98e-05	2.79e-06	4.32e-06	0	1.97e-06	3.78e-06	2.59e-05	5.51e-06	4.91e-07	5.52e-06	3.76e-06	6.95e-05	0.000159661	1.15e-06	4.11e-06	6.1e-06	0.000329476	3.82e-05	7.52e-06	6.15e-05	3.47e-06	2.31e-06	1.58e-05	4.87e-05
Methylotenera_mobilis	6.32e-06	6.92e-06	1.19e-05	7.31e-06	6.67e-06	9.5e-06	2.52e-05	1.24e-05	2.86e-05	1.22e-05	3.37e-05	4.29e-06	0	3.02e-05	7.38e-06	4.36e-05	2.51e-05	1.52e-05	2.37e-05	2.3e-05	3.5e-06	4.05e-06	1.01e-05	7.67e-06	1.56e-05	8.74e-06	5.73e-06	2.03e-05	3.12e-05	1.35e-05	9.11e-06	2.76e-06	1.17e-05	1.01e-05	1.89e-05	2.12e-05	3.88e-06	8.68e-06	2.42e-06	1.48e-05	4.54e-05	1.68e-05	1.21e-05	5.5e-06	8.31e-06	2.18e-06	1.59e-05	4.28e-06
Methylotenera_versatilis	1.74e-05	4.99e-07	9.76e-07	7.94e-06	1.11e-05	5.38e-06	0	0	0	3.6e-06	5.52e-06	6.91e-06	2.37e-06	1.54e-05	3.78e-05	2.5e-05	5.24e-05	2.38e-05	3.15e-05	1.43e-05	3.97e-05	1.22e-06	2.41e-05	4.45e-05	8.27e-07	1.01e-06	1.59e-06	1.05e-05	1.68e-06	1.01e-05	6.64e-06	5.49e-06	1.32e-05	1.63e-06	9.03e-06	5.76e-06	1.06e-05	5.73e-07	7.25e-07	5.81e-07	7.03e-06	7.27e-06	3.47e-06	5.5e-07	5.58e-06	3.84e-07	1.72e-05	1.45e-05
Methylovorus_glucosotrophus	1.45e-05	8.29e-06	1.12e-05	3.45e-06	1.03e-05	1.28e-05	5.05e-05	2.31e-05	1.41e-05	1.13e-05	7.84e-05	1.36e-05	6.38e-06	5.62e-05	4.31e-06	8.71e-06	8.52e-06	9.8e-06	1.42e-05	1.21e-05	9.88e-06	8.92e-06	9.6e-06	2.05e-06	1.04e-05	1.03e-05	7.49e-06	3.5e-06	2.04e-05	7.56e-06	1.51e-05	2.77e-05	5.4e-06	1.42e-05	1.1e-05	1.2e-05	1.86e-06	1.3e-05	1.69e-06	2.44e-05	5.95e-06	3.14e-05	6.94e-06	1.47e-06	1.3e-05	1.15e-05	2.81e-05	9.5e-06
Methylovorus_sp._MP688	1.49e-05	1.28e-05	3.69e-06	1.46e-06	5e-06	1.77e-06	5.94e-06	5.22e-06	0	1.53e-05	1.49e-05	9.76e-06	2.92e-06	1.3e-05	3.08e-06	1.09e-06	1.12e-05	1.04e-05	3.81e-06	6.24e-06	0	5.47e-06	8.67e-06	8.22e-07	9.93e-06	1.11e-05	3.19e-05	1.12e-05	6.19e-06	7.87e-06	6.74e-06	8.5e-06	8.94e-06	1.16e-05	9.35e-06	5.93e-06	5.06e-07	1.91e-06	5.68e-06	6.97e-06	3.79e-06	2.29e-06	2.2e-05	1.3e-05	9.18e-06	4.1e-06	5.03e-06	1.88e-05
Micavibrio_aeruginosavorus	0.000316958	8.48e-05	0.000157018	0.000569927	0.00041831	0.000210509	0.000732146	0.000196824	0.000155976	3.07e-05	9.99e-05	4.64e-05	9.48e-06	0.000289474	0.000190149	7.19e-05	6.07e-05	0.000484513	7.23e-05	0.000146181	0.00029934	4.93e-05	0.000250364	6.62e-05	0.000403926	3.08e-05	2.02e-05	2.38e-05	7.97e-05	0.000151492	0.000244175	9.34e-05	4.56e-05	1.95e-05	0.000106291	0.000244882	0.000111982	4.44e-05	1.22e-05	6.25e-05	0.000202879	0.000164403	3.36e-05	0.000199993	6.21e-05	5.9e-05	0.000210044	9.62e-05
Microbacterium_testaceum	0.000311586	0.000244706	0.000135005	0.000109911	0.000248598	0.000249152	0.000212367	0.000464297	0.000557531	0.000318859	0.00034676	0.000266945	0.000177929	0.000121591	8.83e-05	7.79e-05	4.36e-05	0.00027875	6e-05	0.00016994	0.000219873	0.000135419	0.000180337	3.58e-05	0.000190071	0.000222605	0.000141657	0.000233497	0.00035996	0.00025889	0.000100224	0.000303051	0.000175873	0.000367176	0.000268259	0.000179636	2.27e-05	4.01e-05	7.49e-06	0.000200804	9.47e-05	0.000144243	0.000267566	5.76e-05	0.000182444	0.000382202	0.000170036	0.000293663
Micrococcus_luteus	0.000265765	0.000304069	0.000163958	6.81e-05	0.000198322	0.000143612	0.000151478	0.000351865	0.000442209	0.000367526	0.000340134	0.000249324	0.00013928	0.000196274	8.71e-05	0.000104551	0.000368739	0.00033094	0.000120769	0.00015947	0.000175198	0.00017272	0.000168159	4.14e-05	0.000172698	0.000263782	0.000228694	0.000177569	0.000351918	0.000229285	9.62e-05	0.000252782	0.000209359	0.000256978	0.000268927	0.000370119	5.01e-05	0.000106693	4.95e-05	0.00024236	0.000139581	0.000147984	0.000257442	0.00010495	0.000188274	0.000371315	0.000286664	0.000391313
Microcoleus_sp._PCC_7113	4.11e-06	2.06e-06	2.17e-06	5.54e-06	4.72e-06	3.8e-06	1.19e-05	0	1.66e-06	4.79e-07	0	1.43e-06	8.93e-06	6.17e-06	3.08e-06	3.81e-06	8.31e-07	1.16e-05	1.16e-05	1.03e-05	2.06e-06	4.46e-06	1.31e-05	9.29e-05	7.76e-06	2.53e-06	7.75e-06	0	4.28e-06	5.04e-06	4.6e-06	4.43e-06	5.89e-07	2.9e-06	1.44e-06	3.73e-06	1.18e-06	3.63e-06	1.45e-06	0	0	5.4e-06	3.18e-06	7.34e-07	2.85e-06	0	2.18e-05	2.38e-06
Microcystis_aeruginosa	5.15e-05	1.02e-05	4.71e-05	1.23e-05	4.78e-05	3.5e-05	0.000157419	0.000218816	7.3e-05	3.33e-05	9.83e-05	2.79e-05	1.42e-05	7.59e-05	5.97e-05	5.23e-05	3.18e-05	5.58e-05	3.31e-05	1.55e-05	4.67e-05	4.76e-05	0.000168861	3.71e-05	2.7e-05	1.89e-05	2.63e-05	0.000132128	1.64e-05	0.000124091	4.84e-05	1.69e-05	1.36e-05	4.35e-05	5.03e-05	8.29e-05	3.05e-05	2.75e-05	5.07e-06	0.000125248	4e-05	2.93e-05	0.000355501	1.52e-05	1.53e-05	1.63e-05	0.000134242	0.00044287
Microlunatus_phosphovorus	0.000180758	0.000192563	0.000116787	1.33e-05	0.000130826	0.000127712	0.000151974	0.000303484	0.000379984	0.000220804	0.000134176	0.000219795	0.000116492	8.95e-05	4.43e-05	3.38e-05	1.89e-05	0.000228159	5.34e-05	0.000168732	0.000164287	0.00012062	0.000152233	2.64e-05	0.000161736	0.000183583	0.000142626	0.000111156	0.000290016	0.000153696	7.47e-05	0.000208088	0.000151422	0.000232167	0.00019188	0.000206412	2.16e-05	2.95e-05	2.9e-05	0.000143265	0.000103874	0.000103506	0.00018773	6.31e-05	0.000152802	0.000293952	0.000178591	0.000245194
Micromonospora_aurantiaca	5.06e-06	9.68e-06	6.4e-06	4.18e-06	5.28e-06	7.29e-06	7.92e-06	5.5e-06	2.49e-06	3.84e-06	0	9.76e-06	5.47e-07	1.91e-05	2.46e-06	1.09e-05	1.04e-05	3.46e-05	1.84e-05	3.42e-06	1.71e-05	3.24e-06	1.48e-05	2.6e-06	9.93e-06	5.45e-06	6.78e-06	4.19e-06	3.47e-06	0	5.14e-06	5.45e-06	6.97e-06	8.06e-06	1.38e-05	1e-05	3.12e-06	1.9e-05	7.25e-07	1.08e-05	1.3e-05	1.89e-05	3.47e-06	5.87e-06	7.94e-06	7.94e-06	2.3e-05	9.03e-06
Micromonospora_sp._L5	6.32e-07	4.82e-06	4.88e-06	4.18e-06	1.11e-06	1.14e-06	6.93e-06	5.5e-06	2.49e-06	1.92e-06	3.31e-06	2.38e-06	1.64e-06	5.55e-06	1.23e-05	3.81e-06	5.82e-06	1.2e-06	2.22e-05	1.81e-06	5.15e-06	3.24e-06	1.36e-05	2.74e-07	1.65e-05	8.62e-06	3.08e-06	0	2.95e-06	3.15e-06	1.83e-06	3.78e-06	1.96e-06	1.27e-06	5.1e-06	6.44e-06	3.88e-06	2.29e-06	3.62e-06	6.1e-06	2.11e-05	6.24e-06	2.89e-06	3.3e-06	5.09e-06	3.33e-06	1.62e-05	4.28e-06
Mobiluncus_curtisii	7.71e-05	3.97e-05	3.07e-05	2.21e-05	4.58e-05	3.72e-05	3.76e-05	2.91e-05	7.34e-05	5.42e-05	6.46e-05	3.45e-05	2.88e-05	0.000135787	3.91e-05	0.000148658	0.000109895	5.46e-05	4.33e-05	5.84e-05	4.14e-05	2.43e-05	5.55e-05	3.18e-05	4.15e-05	4.57e-05	2.61e-05	4.19e-06	3.89e-05	5.86e-05	3.67e-05	2.8e-05	3.39e-05	3.23e-05	5.79e-05	9.17e-05	2.59e-05	7.45e-05	8.81e-06	6.02e-05	0.000210994	6.07e-05	2.4e-05	2.79e-05	3.96e-05	7.42e-05	8.98e-05	8.2e-05
Modestobacter_marinus	0.000114712	8.3e-05	5.76e-05	1.73e-05	8.86e-05	8.48e-05	0.000135638	0.000155041	0.000269225	9.59e-05	0.000163993	7.93e-05	4.94e-05	0.000151835	2.43e-05	2.67e-05	0.000156636	0.000137775	8.06e-05	5.86e-05	7.49e-05	3.83e-05	0.000119444	3.14e-05	8.16e-05	0.000105665	6.81e-05	6.15e-05	0.000133003	6.05e-05	6.64e-05	0.000124961	7e-05	0.000124233	0.000162671	0.000333514	2.57e-05	7.25e-05	2.04e-05	0.000167966	6.87e-05	9.35e-05	0.000116572	3.12e-05	9.28e-05	0.000158055	0.000159845	9.62e-05
Moorella_thermoacetica	0.000171594	0.000118792	0.000120257	5.3e-05	0.000193323	0.000107123	0.000339094	0.000101986	0.000187918	0.000281219	0.000379338	0.000165501	4.17e-05	0.00034132	9.42e-05	0.000202023	0.000277541	0.000139375	0.000199781	0.000144771	0.000113025	0.00016968	0.000174716	0.000113705	0.0001667	0.000381862	0.000289216	0.000390792	0.000162508	0.000155901	0.000116208	0.000146463	0.000144843	0.000201834	0.000160386	0.000618898	0.000111898	0.000195922	7.79e-05	0.000325181	0.000287818	0.000202023	0.00014463	0.000124216	0.000218412	0.000194431	0.000286538	0.000172254
Moraxella_catarrhalis	3.98e-05	2.73e-06	5.1e-06	1.78e-06	1.22e-05	3.99e-06	2.33e-05	5.22e-06	3.4e-05	4.56e-06	6.63e-06	1.91e-06	1.68e-05	5.55e-06	1.35e-05	0.000160094	6.23e-05	6.8e-06	2.25e-05	8.05e-06	8.23e-07	4.66e-06	4.22e-06	1.3e-05	1.42e-05	1.15e-05	7.14e-06	4.19e-06	4.11e-06	2.39e-05	6.78e-06	4.72e-06	6.97e-06	6.79e-06	7.03e-06	5.93e-06	1.59e-05	2.29e-06	2.9e-06	2.91e-06	3.35e-05	8.11e-06	2.89e-06	4.4e-06	4.59e-06	4.74e-06	1.26e-05	2.07e-05
Morganella_morganii	2.28e-05	1.35e-05	1.16e-05	2.09e-05	2.44e-05	1.15e-05	4.21e-05	3.16e-05	1.12e-05	9.35e-06	1.6e-05	2.17e-05	9.3e-06	2.16e-05	1.26e-05	3.43e-05	2.8e-05	2.68e-05	1.56e-05	2.21e-05	4.04e-05	8.31e-06	2.27e-05	1.96e-05	2.99e-05	1.48e-05	1.08e-05	2.17e-05	2.03e-05	7.87e-06	2.06e-05	4.09e-05	2.63e-05	2.14e-05	1.58e-05	1.03e-05	2.3e-05	1.26e-05	1.38e-05	1.48e-05	2.76e-05	2.16e-05	1.19e-05	1.98e-05	2.54e-05	2e-05	3.53e-05	2.95e-05
Muricauda_ruestringensis	4.93e-05	1.63e-05	4.16e-05	9.3e-06	1.11e-05	4.31e-05	3.07e-05	5.17e-05	0.000227742	3.81e-05	3.98e-05	3.24e-05	0.000172642	8.58e-05	2.55e-05	3.98e-05	4.51e-05	2.6e-05	3.76e-05	4.51e-05	0.000117554	2.35e-05	0.000133262	1.29e-05	1.68e-05	1.11e-05	0.000133816	3.36e-05	0.000300487	3.18e-05	5.59e-05	6.51e-05	3.22e-05	3.74e-05	3.46e-05	8.83e-05	1.95e-05	1.33e-05	1.71e-05	9.3e-06	6.98e-05	3.72e-05	5.79e-06	2.53e-05	5.12e-05	2.87e-05	2.93e-05	1.78e-05
Mycobacterium_abscessus	2.37e-05	2.04e-05	1.36e-05	5.01e-06	2.78e-05	1.81e-05	7.87e-05	1.48e-05	3.61e-05	2.88e-05	7.01e-05	1.93e-05	2.41e-05	0.000140108	2.46e-06	1.47e-05	2.93e-05	4.06e-05	2.25e-05	2.86e-05	1.91e-05	1.36e-05	2.44e-05	6.85e-06	6.2e-06	1.98e-05	2.5e-05	1.05e-05	2.56e-05	7.87e-06	2.97e-05	2.38e-05	1.57e-05	1.38e-05	3.05e-05	3.61e-05	9.62e-06	2.5e-05	1.15e-05	4.79e-05	1.3e-05	3.47e-05	2.05e-05	3.14e-05	1.13e-05	2.98e-05	2.3e-05	1.35e-05
Mycobacterium_africanum	0	0	0	0	0	0	0	0	0	0	0	0	0	0	0	0	0	0	0	0	0	0	0	0	0	0	0	0	0	0	0	0	0	0	0	0	0	0	0	0	0	0	0	0	0	0	0	0
Mycobacterium_avium	8.28e-05	5.38e-05	2.86e-05	4.51e-05	9.25e-05	7.03e-05	0.000161379	7.94e-05	0.000153487	5.9e-05	4.58e-05	3.81e-05	1.68e-05	0.000111099	2.25e-05	4.9e-06	2.22e-05	0.000117979	2.15e-05	6.22e-05	2.84e-05	2.53e-05	6.6e-05	1.36e-05	5.1e-05	4.22e-05	2.7e-05	2.8e-05	8.49e-05	5.45e-05	9.8e-05	4.67e-05	3.41e-05	3.38e-05	5.62e-05	0.000123373	1.03e-05	3.14e-05	5.43e-06	5.41e-05	2.06e-05	2.79e-05	4.69e-05	2.29e-05	3.39e-05	6.72e-05	7.44e-05	9.38e-05
Mycobacterium_bovis	0	2.66e-07	5.42e-07	0	5.56e-07	6.97e-07	0	0	0	0	0	9.53e-07	0	5.55e-06	0	0	8.31e-07	8e-07	0	0	0	0	0	2.74e-07	4.14e-07	0	1.76e-07	0	8.68e-07	0	9.39e-08	2.3e-07	8.84e-07	1.81e-07	7.38e-07	5.08e-07	3.38e-07	1.91e-07	0	0	0	0	0	3.67e-07	0	7.69e-07	8.18e-07	0
Mycobacterium_canettii	1.86e-05	2.8e-05	1.1e-05	3.13e-07	1.81e-05	1.93e-05	1.58e-05	5.61e-05	8.09e-05	3.79e-05	1.55e-05	4.48e-05	1.66e-05	3.09e-06	5.54e-06	0	2.49e-06	3.98e-05	1.04e-05	2.56e-05	2.06e-05	1.52e-05	1.08e-05	3.01e-06	1.6e-05	2.8e-05	3.77e-05	1.4e-05	5.7e-05	1.17e-05	8.1e-06	3.08e-05	1.95e-05	3.13e-05	3.4e-05	2.32e-05	3.38e-07	1.43e-06	1.93e-06	1.42e-05	6.49e-06	9.15e-06	2.78e-05	4.77e-06	2.52e-05	7.28e-05	9.62e-06	4.16e-05
Mycobacterium_chubuense	0.000105231	0.000106347	3.95e-05	1.02e-05	8.31e-05	5.16e-05	0.000129202	0.0001303	0.00014519	8.8e-05	0.000106568	7.67e-05	5.07e-05	7.28e-05	1.6e-05	1.42e-05	2.8e-05	7e-05	1.72e-05	4.65e-05	5.52e-05	5.11e-05	7.24e-05	8.08e-06	4.78e-05	8.1e-05	6.98e-05	3.5e-05	9.75e-05	5.54e-05	4.96e-05	8.99e-05	6.03e-05	8.35e-05	8.2e-05	6.02e-05	1.12e-05	5.65e-05	1.34e-05	5.61e-05	5.68e-05	5.18e-05	7.26e-05	1.56e-05	6.81e-05	8.88e-05	5.01e-05	7.03e-05
Mycobacterium_gilvum	0.000100175	0.000105981	5.31e-05	9.61e-06	4.22e-05	4.27e-05	0.000152469	9.9e-05	0.00013399	0.000110761	0.000173932	7.48e-05	7.04e-05	0.000112333	1.32e-05	3.59e-05	3.82e-05	8e-05	4.07e-05	3.2e-05	5.62e-05	5.53e-05	5.36e-05	1.47e-05	7.11e-05	7.75e-05	6.17e-05	4.61e-05	8.81e-05	4.57e-05	3.8e-05	6.95e-05	4.43e-05	7.67e-05	7.98e-05	8.32e-05	1.38e-05	3.03e-05	2.11e-05	4.91e-05	5.03e-05	4.93e-05	9.92e-05	2.86e-05	6.09e-05	8.08e-05	4.77e-05	0.00010454
Mycobacterium_indicus_pranii	0	1.33e-07	4.34e-07	0	0	1.52e-06	0	1.1e-06	0	0	0	0	3.65e-07	0	0	0	0	0	8.66e-07	0	8.23e-07	0	4.68e-07	0	0	0	0	0	0	0	3.52e-07	4.18e-08	9.82e-07	1.45e-06	1.51e-06	3.39e-07	0	0	0	8.72e-07	1.08e-06	0	0	0	0	0	6.92e-07	0
Mycobacterium_intracellulare	0	2.4e-06	2.17e-07	0	1.11e-06	2.53e-07	3.96e-06	0	8.3e-07	3.84e-06	0	9.53e-07	1.09e-06	3.7e-06	0	2.18e-06	8.31e-07	8e-07	0	1.61e-06	0	0	4.68e-07	0	2.48e-06	2.03e-06	6.17e-07	4.19e-06	6.94e-07	0	1.1e-06	1.61e-06	3.04e-06	0	3.13e-06	2.54e-06	1.43e-06	0	0	0	8.12e-06	0	0	1.65e-06	1.98e-06	0	2.83e-06	0
Mycobacterium_leprae	0.000148209	8.45e-05	7.02e-05	8.36e-06	7.69e-05	4.71e-05	7.47e-05	0.000137997	0.00015888	0.000100692	8.78e-05	6.55e-05	5.8e-05	8.33e-05	2.18e-05	6.1e-05	3.26e-05	6.92e-05	7.14e-05	7.17e-05	4.61e-05	3.41e-05	5.62e-05	3.27e-05	6.04e-05	7.12e-05	3.6e-05	5.38e-05	8.51e-05	0.000112438	4.28e-05	8.85e-05	4.57e-05	0.00010223	7.33e-05	3.12e-05	1.56e-05	7.54e-06	3.62e-06	7.15e-05	5.9e-05	6.92e-05	9.23e-05	1.71e-05	5.73e-05	0.000105029	6.06e-05	7.75e-05
Mycobacterium_liflandii	4.11e-06	5.12e-06	3.25e-06	4.18e-07	5.56e-06	6.72e-06	8.91e-06	2.12e-05	2.82e-05	1.37e-05	7.73e-06	1.62e-05	8.39e-06	0	1.23e-06	0	0	3.6e-06	1.39e-06	4.83e-06	1.11e-05	2.84e-06	2.81e-06	0	8.07e-06	6.59e-06	4.14e-06	8.39e-06	1.32e-05	8.19e-06	3.73e-06	1.32e-05	4.81e-06	1.64e-05	8.08e-06	0	0	5.73e-07	0	6.97e-06	5.41e-06	4.16e-06	8.1e-06	3.12e-06	6.82e-06	1.43e-05	2.83e-06	3.8e-06
Mycobacterium_marinum	2.28e-05	1.22e-05	8.13e-06	6.27e-07	3.33e-05	1.19e-05	4.11e-05	2.89e-05	1.95e-05	1.92e-05	2.21e-05	1.38e-05	1e-05	1.23e-05	5.54e-06	3.27e-06	1.25e-05	1.82e-05	6.41e-06	7.65e-06	6.79e-06	1.34e-05	2.53e-05	1.37e-06	1.09e-05	1.06e-05	6.87e-06	6.99e-06	1.55e-05	6.93e-06	9.06e-06	1.77e-05	7.86e-06	2.1e-05	1.9e-05	1.47e-05	1.94e-06	3.91e-06	1.45e-06	1.95e-05	1.62e-05	1.16e-05	1.71e-05	2.2e-06	1.19e-05	2.59e-05	1.22e-05	1.64e-05
Mycobacterium_rhodesiae	3.35e-05	5.39e-05	1.33e-05	4.63e-05	3.11e-05	4.95e-05	4.7e-05	5.77e-05	4.81e-05	5.56e-05	1.77e-05	2.14e-05	2.04e-05	3.46e-05	1.05e-05	3.27e-06	3.32e-06	6.72e-05	3.29e-05	4.71e-05	3.36e-05	2.57e-05	3.44e-05	1.18e-05	2.85e-05	4.83e-05	3.51e-05	3.01e-05	4.04e-05	1.95e-05	1.83e-05	2.75e-05	2.2e-05	3.14e-05	4.94e-05	4.52e-05	6.41e-06	1.77e-05	2.83e-05	4.24e-05	3.35e-05	2.97e-05	2.4e-05	2.62e-05	2.26e-05	5.37e-05	2.62e-05	9.48e-05
[truncated: 597 more rows]
