# Supplementary material for: Social networks predict gut microbiome composition in wild baboons
Source: eLife. 2015 Mar 16;4:e05224. doi: 10.7554/eLife.05224 (PMC4379495; doi:10.7554/eLife.05224)
Supplement: Supplementary file 5. — Table listing the relative abundance of enzyme gene orthologs in each sample. DOI: http://dx.doi.org/10.7554/eLife.05224.018 [file elife05224s005.xlsx]

## Sheet: enzyme orthologs
enzyme	F01	F02	F03	F04	F05	F06	F07	F08	F09	F10	F11	F12	F13	F14	F15	F16	F17	F18	F19	F20	F21	F22	F23	F24	F25	F26	F27	F28	F29	F30	F31	M01	M02	M03	M04	M05	M06	M07	M08	M09	M10	M11	M12	M13	M14	M15	M16	M17
K00001_alcohol_dehydrogenase	6.96e-05	8.65e-05	0.00012937	6.73e-05	5.96e-05	4.45e-05	4.66e-05	5.79e-05	7.41e-05	9.31e-05	8.38e-05	7.18e-05	5.8e-05	0.000105612	0.000168483	0.000196344	0.000158487	8.6e-05	0.000206927	0.000100108	6.95e-05	7.09e-05	0.000110099	4.8e-05	0.000123098	5e-05	6.98e-05	7.7e-05	3.65e-05	3.95e-05	4.86e-05	5.6e-05	5.24e-05	7.47e-05	9.57e-05	6.49e-05	0.000168438	0.000242271	3.66e-05	8.99e-05	0.000270763	5.84e-05	0.000154825	5.11e-05	5.08e-05	7.54e-05	7.95e-05	8.58e-05
K00002_alcohol_dehydrogenase_(NADP+)	2.04e-05	1.04e-05	1.61e-05	2.63e-05	6.51e-06	2.75e-05	2.95e-05	9.23e-06	1.18e-05	1.5e-05	2.26e-05	2.9e-05	1.3e-05	2.52e-05	9.46e-06	2.15e-05	4.5e-06	5.52e-06	1.96e-05	5.79e-06	0	2.08e-05	5.87e-05	1e-06	1.39e-05	2.47e-05	7.3e-07	2.81e-05	1.4e-05	0	3.09e-05	1.19e-05	1.8e-05	1.14e-05	1.26e-05	2.49e-05	1.38e-05	1.66e-05	6.08e-06	1.37e-05	2.16e-05	3.06e-05	8.43e-06	1.26e-05	9.29e-06	1.36e-05	3.15e-05	2.89e-05
K00003_homoserine_dehydrogenase	0.000202423	0.00060454	0.000300044	4.68e-05	0.000274986	0.000304143	0.000123925	0.000428485	0.000438679	0.000439752	0.000272882	0.000303768	0.000287908	4.89e-05	0.000172598	6.87e-05	5.91e-05	0.000415048	0.000141722	0.000299029	0.000360531	0.000242337	0.000157916	0.000105612	0.000447878	0.000377813	0.00025917	0.000250825	0.000392743	0.000403049	0.000160716	0.000519186	0.000309795	0.000364987	0.000437572	0.000133074	3.71e-05	0.000262657	0.00016543	0.000260813	0.000240536	0.000261061	0.000534604	0.000218779	0.000344204	0.000673738	0.000110009	0.000368243
K00004_(R,R)-butanediol_dehydrogenase	0	1.04e-06	0	0	0	0	0	0	0	0	0	0	0	0	0	0	0	0	0	0	0	0	5.96e-06	0	0	3.15e-06	0	0	0	0	0	0	0	0	0	0	0	0	0	0	0	0	0	0	0	1.73e-06	1.41e-06	0
K00005_glycerol_dehydrogenase	8.23e-05	1.63e-05	4.02e-05	5.94e-06	3.18e-05	3.56e-05	2.9e-05	2.29e-05	0.000122931	4.55e-05	5.62e-05	9.93e-05	9.11e-06	8.42e-05	1.79e-05	7.6e-05	1.31e-05	7.59e-05	1.45e-05	3.5e-05	3.19e-05	6.81e-05	0.000123956	4.68e-05	4.16e-05	1.56e-05	5.82e-05	1.38e-05	0.000101513	6.5e-05	0.000143591	4.4e-05	3.98e-05	1.92e-05	5.57e-05	2.02e-05	8.74e-05	3.91e-05	6.59e-05	6.74e-06	5.33e-05	4.88e-05	4.93e-05	1.25e-05	6.19e-06	3.44e-05	5.47e-05	8.69e-05
K00006_glycerol-3-phosphate_dehydrogenase_(NAD+)	0	0	0	0	0	0	0	0	0	0	0	0	0	0	0	0	0	0	0	5.96e-06	0	0	0	0	0	0	0	0	0	0	0	0	0	0	0	0	0	0	0	0	0	0	0	0	0	0	0	0
K00008_L-iditol_2-dehydrogenase	1.23e-05	2.31e-05	3.76e-05	1.96e-05	3.94e-05	1.25e-05	1.85e-05	1.42e-05	0	2.07e-05	4.97e-05	6.57e-05	9.5e-06	6.06e-05	5.77e-05	0.0001012	1.88e-05	1.69e-05	3.06e-05	1.8e-05	6.7e-06	4.33e-05	6.14e-05	5.54e-05	2.95e-05	2.91e-05	1.2e-05	2.91e-05	1.07e-05	3.34e-05	4.3e-05	1.96e-05	4.93e-05	2.36e-05	3.66e-05	3.11e-05	2.9e-05	1.77e-05	6.36e-05	4.31e-05	6.83e-05	3.79e-05	1.66e-05	7.88e-05	6.32e-06	3.15e-05	2.15e-05	5.41e-05
K00009_mannitol-1-phosphate_5-dehydrogenase	5.6e-06	2.23e-06	1.54e-05	0	6.04e-06	3.76e-06	5.63e-06	0	0	9.6e-06	0	0	2.88e-06	0	0	0	2.59e-05	2.06e-05	4.04e-06	1.11e-05	6.03e-06	0	1.66e-05	0	0	0	1.85e-06	0	0	0	1.61e-05	3.4e-06	0	0	9.7e-06	0	2.22e-05	0	5.82e-06	1.14e-05	1.05e-05	5.84e-06	1.58e-05	1.19e-05	0	3.27e-06	2.62e-06	1.11e-05
K00010_myo-inositol_2-dehydrogenase	6.32e-06	1.64e-05	1.75e-05	6.73e-06	1.38e-05	1.49e-05	6.34e-06	1.48e-05	1.26e-05	5.43e-06	2.08e-05	1.89e-05	6.52e-06	1.74e-05	0	1.18e-05	3.38e-05	2.92e-05	1.59e-05	1.26e-05	6.9e-06	2.99e-05	6.41e-06	0	2.64e-05	3.03e-05	4.18e-06	2.99e-05	1.11e-05	8.97e-06	5.81e-06	1.85e-05	1.61e-05	1.85e-05	1.8e-05	1.34e-05	1.51e-05	3.02e-05	2.62e-05	0	2.37e-05	1.31e-05	8.88e-06	4.06e-05	6.68e-06	3.67e-06	2.21e-05	6.24e-06
K00011_aldehyde_reductase	0	0	0	0	0	0	0	0	0	0	0	0	0	0	0	0	0	0	8.47e-06	0	5.97e-06	0	0	0	0	0	0	0	0	0	0	0	2.88e-06	0	0	0	0	0	1.41e-05	0	0	0	0	0	0	0	1.58e-06	0
K00012_UDPglucose_6-dehydrogenase	0.00213504	0.00104853	0.00189296	0.00214573	0.00217815	0.00207461	0.0024034	0.00147358	0.00150811	0.00187074	0.00261995	0.00191446	0.00216921	0.00285728	0.00215521	0.00187751	0.0026312	0.00201538	0.00217367	0.00223957	0.00194066	0.00245083	0.00238545	0.00238967	0.00170658	0.00176484	0.00236218	0.0017915	0.00209226	0.00146296	0.00252268	0.0013851	0.00172693	0.00169012	0.001861	0.00252333	0.00260094	0.00203911	0.00218632	0.00144566	0.00171443	0.00210131	0.00166151	0.00169613	0.00191822	0.00125391	0.00227546	0.0022412
K00013_histidinol_dehydrogenase	0.000785171	0.00131934	0.000869346	0.000843758	0.000813903	0.000910276	0.000662295	0.00113996	0.000877342	0.00121718	0.000743107	0.00108824	0.00109436	0.000623159	0.00087673	0.000440818	0.000685772	0.000956897	0.000829949	0.000964776	0.00105484	0.000792355	0.000708564	0.000688391	0.00113154	0.0011358	0.00101706	0.000891594	0.00110952	0.000905688	0.000592131	0.00132767	0.00104789	0.00122904	0.00103924	0.000661731	0.000784784	0.000778894	0.000961816	0.000932169	0.000693497	0.00077741	0.0012328	0.000991399	0.001052	0.0012847	0.000743464	0.00102508
K00014_shikimate_5-dehydrogenase	0.000243376	0.000261514	0.000213052	0.00017614	0.000224018	0.000182404	0.000136944	0.000258634	0.000127675	0.000309417	0.00011524	0.000314323	0.000529912	0.000128722	0.000301691	0.000388174	0.000404841	0.000222783	0.000428839	0.000289394	0.000207319	0.000184586	0.000182226	0.000464731	0.000250285	0.000307828	0.000381801	0.000300229	0.000267835	0.000298128	0.000152351	0.000343793	0.000433049	0.000293435	0.000183803	0.0001527	0.000222649	0.000260982	0.000639241	0.000137687	0.000463381	0.000208711	0.000185694	0.000642703	0.000315438	0.000193003	0.000185726	0.000261319
K00015_glyoxylate_reductase	0	0	0	0	0	0	0	0	0	0	0	6.49e-06	0	0	0	0	0	0	0	0	0	0	0	0	3.6e-06	0	0	0	0	0	0	5.76e-07	0	1.4e-06	0	0	0	0	0	7.62e-06	0	0	0	0	0	0	0	1.14e-05
K00016_L-lactate_dehydrogenase	0.000370608	0.000832268	0.000349693	6.64e-05	0.00034247	0.000349019	0.000122352	0.000447353	0.000440463	0.000488652	0.000401563	0.000445384	0.000226326	0.000111846	0.000138232	0.000154372	5.18e-05	0.000569887	8e-05	0.000403307	0.000350502	0.000312093	0.00023814	9.32e-05	0.000497257	0.000431431	0.000283047	0.000298143	0.000446488	0.00052127	0.000180214	0.000527981	0.000483547	0.000584368	0.000448489	0.000119556	8.12e-05	0.000156224	0.000116159	0.000426206	0.000171989	0.000351513	0.000569564	0.00024109	0.000427211	0.000623568	0.000144369	0.000600747
K00018_glycerate_dehydrogenase	2.67e-05	2.53e-05	2.77e-05	1.41e-05	8.67e-05	2.92e-05	4.01e-05	2.1e-05	2.66e-05	2.85e-05	3.28e-05	4.02e-05	2.85e-05	9.46e-05	5.25e-05	5.03e-05	2.56e-05	4.92e-05	5.55e-05	4.08e-05	5.78e-05	3.14e-05	6.02e-05	5.39e-05	4.39e-05	7.45e-05	3.35e-05	6.79e-05	3.79e-05	1.94e-05	5e-05	4.35e-05	7.12e-05	3.06e-05	4.43e-05	0.000102086	7.45e-05	8.87e-05	6.23e-05	0.000110604	8.66e-05	8.35e-05	0.000104052	6.43e-05	4.28e-05	3.87e-05	5.5e-05	5.93e-05
K00019_3-hydroxybutyrate_dehydrogenase	0	0	5.88e-06	0	0	0	0	0	0	0	0	0	0	0	0	0	0	0	0	0	8.84e-06	9.76e-06	0	0	0	0	0	3.98e-05	0	8.7e-06	0	4.35e-06	3.53e-06	0	0	3.48e-06	0	0	0	0	0	8.66e-06	1.12e-05	0	4.29e-06	0	1.34e-06	0
K00020_3-hydroxyisobutyrate_dehydrogenase	7.44e-06	2.67e-06	4.92e-06	0	0	0	0	5.63e-06	0	0	0	0	0	0	0	0	9.76e-06	7.28e-06	0	0	0	0	0	8.37e-06	0	3.9e-06	2.43e-06	0	2.7e-06	0	1.1e-06	4.82e-06	0	0	1.14e-06	0	0	6.93e-06	0	1.61e-05	0	0	0	0	3.18e-06	0	0	0
K00023_acetoacetyl-CoA_reductase	0	0	0	8.4e-06	9.51e-06	0	0	0	0	0	0	0	0	0	0	0	0	0	0	0	0	0	0	0	0	0	0	0	0	0	1.16e-06	7.66e-06	0	0	1.4e-06	0	7.01e-06	0	0	1.03e-05	0	0	0	0	0	0	2.08e-06	0
K00024	0.00105709	0.000422676	0.00105804	0.00150779	0.000843774	0.00138057	0.00119477	0.00119288	0.00079879	0.000803404	0.001047	0.000767022	0.00198901	0.00111733	0.00129722	0.000718758	0.00146741	0.00063857	0.00123771	0.00126736	0.00106663	0.000754086	0.00124847	0.00114294	0.000803359	0.00126459	0.00187936	0.00117098	0.00138341	0.000755061	0.000936216	0.000965269	0.000943166	0.00111009	0.000757038	0.00138856	0.0014579	0.00110955	0.00156359	0.000649607	0.00104449	0.000658389	0.000468293	0.000986879	0.00103817	0.000784427	0.001123	0.000644828
K00025_malate_dehydrogenase	0	0	0	0	0	0	0	0	0	0	0	0	0	0	0	0	0	0	0	0	0	0	0	0	0	0	0	0	0	0	4.28e-07	3.71e-07	0	0	0	0	0	0	0	0	0	0	0	0	0	0	0	0
K00026_malate_dehydrogenase	0	0	0	0	0	0	0	0	0	0	0	0	0	0	0	0	0	0	0	0	0	0	0	6.06e-06	3.78e-06	0	0	0	0	0	0	0	0	0	0	0	0	0	0	0	1.19e-05	0	0	0	0	0	0	0
K00027_malate_dehydrogenase_(oxaloacetate-decarboxylating)	0.000617259	0.000514332	0.000912673	0.000605433	0.00084121	0.000521138	0.000661714	0.000460447	0.000870065	0.000665382	0.0007704	0.000742643	0.000391663	0.000719122	0.000720786	0.000986204	0.000796988	0.000583794	0.000900507	0.000770455	0.000667647	0.000750792	0.000705935	0.000707081	0.000743295	0.000618185	0.000390186	0.0010289	0.000438753	0.000961896	0.00068761	0.000676431	0.000717416	0.000684889	0.000790471	0.000889109	0.00106465	0.00134048	0.00107843	0.000822383	0.0013158	0.00112067	0.000655251	0.00120315	0.000525654	0.000608967	0.000958954	0.000656184
K00028_malate_dehydrogenase_(decarboxylating)	3.36e-06	2.63e-06	1.47e-06	1.21e-05	3.19e-06	3.22e-06	1.84e-06	4.39e-07	9.1e-07	3.13e-06	5.79e-07	1.99e-06	4.75e-07	2.71e-06	1.45e-06	0	1.34e-06	1.96e-06	2.45e-06	4.23e-06	7.03e-07	7.46e-07	8.28e-07	7.3e-07	2.37e-06	2.46e-06	6.29e-07	1.43e-06	1.93e-06	2.3e-06	4.08e-06	1.91e-06	2.03e-06	2.11e-06	4.45e-06	2.12e-06	6.68e-06	9.04e-06	2.44e-06	1.95e-06	5.09e-06	2.55e-06	2.3e-06	1.88e-06	1.96e-06	3.94e-06	2.35e-06	7.96e-06
K00029_malate_dehydrogenase_(oxaloacetate-decarboxylating)(NADP+)	0.000644361	0.000167656	0.000370158	0.000740789	0.000629842	0.000647166	0.000377341	0.000524614	0.000245738	0.000393895	0.000359994	0.00044072	0.00097983	0.000574769	0.000681745	0.000317728	0.000656795	0.000458505	0.000665549	0.00051962	0.000495312	0.000339073	0.000598977	0.000613449	0.00035091	0.000668592	0.000909979	0.000528637	0.000639442	0.000335511	0.000444897	0.000503624	0.000680387	0.000494847	0.000344385	0.000908702	0.000714094	0.000381992	0.000891239	0.000549204	0.000395809	0.000427134	0.000151712	0.000547787	0.000572176	0.000367168	0.000613208	0.000363921
K00030_isocitrate_dehydrogenase_(NAD+)	9.55e-05	9.76e-05	0.000102646	0.000105214	0.000146675	7.4e-05	7.04e-05	5.63e-05	5.17e-05	9.48e-05	8.18e-05	4.41e-05	3.11e-05	0.000108147	0.00014246	0.000149509	0.000149764	0.00016198	0.000138644	0.000137872	8.3e-05	9.43e-05	0.000102879	0.000111287	7.3e-05	9.68e-05	4.97e-05	0.000188449	6.4e-05	9.63e-05	0.000105088	6.42e-05	8.15e-05	8.24e-05	0.000113514	0.000185037	0.000147851	0.000120972	6.93e-05	0.000126491	0.000104805	0.000140322	0.000111854	0.000110253	5.33e-05	7.36e-05	0.000150758	0.000141063
K00031_isocitrate_dehydrogenase	0.0017158	0.00151928	0.00240192	0.00139316	0.00190165	0.00178557	0.00120113	0.00159307	0.00180547	0.00213443	0.00173769	0.00209153	0.0012055	0.00148737	0.00188444	0.00200605	0.00166759	0.00285555	0.00215137	0.00186464	0.00201203	0.00224482	0.00186912	0.00207669	0.00199268	0.00128657	0.00137988	0.00129759	0.00177092	0.00188186	0.00182749	0.00171296	0.00206862	0.00166238	0.00169926	0.00223272	0.00205053	0.00209421	0.00217226	0.00155537	0.00287178	0.00212472	0.00192976	0.00220128	0.00155175	0.00167127	0.00258769	0.00242625
K00033_6-phosphogluconate_dehydrogenase	0.000483984	0.00158659	0.000582826	0.000222792	0.000515799	0.000610055	0.000327575	0.000801757	0.000894549	0.00091654	0.000404509	0.000900422	0.000381058	0.000205195	0.000198045	0.000184676	0.00023031	0.000816142	0.000234355	0.000616932	0.000492951	0.000678934	0.000368557	0.000250867	0.000746267	0.000929943	0.000546682	0.000497683	0.000745185	0.000632615	0.000357629	0.000771938	0.00050749	0.000856114	0.000953172	0.000502235	0.00023262	0.000322937	7.42e-05	0.000749367	0.000323428	0.000557468	0.00119534	0.000337967	0.000682444	0.00107259	0.000367351	0.00114473
K00034_glucose_1-dehydrogenase	0	1.62e-06	0	0	0	0	0	0	0	0	0	0	0	0	0	1.53e-05	0	0	0	0	0	0	0	0	0	0	0	0	0	0	0	0	0	0	0	0	0	0	0	0	0	0	0	0	0	0	0	0
K00035_D-galactose_1-dehydrogenase	0	0	0	0	0	0	0	0	0	0	0	0	0	0	0	0	0	0	0	0	0	0	0	0	0	0	0	0	0	0	0	0	0	0	0	0	0	0	0	0	0	0	0	0	0	0	1.32e-06	5.63e-06
K00036_glucose-6-phosphate_1-dehydrogenase	0.000382862	0.00120574	0.000378782	8.67e-05	0.000408607	0.000408849	0.000195265	0.000592627	0.000593138	0.000726347	0.000374335	0.000543228	0.000246785	6.39e-05	0.000185051	2.28e-05	6.54e-06	0.000538701	5.19e-05	0.000344851	0.000511718	0.000460466	0.000186996	0.000127049	0.000572372	0.00064952	0.000345747	0.000257972	0.000539843	0.000620267	0.000264626	0.00065516	0.000393119	0.000680737	0.000526399	0.000126262	5.23e-05	0.00018644	1.72e-05	0.000476105	0.000183582	0.000304509	0.000782878	0.000265282	0.000446523	0.000790788	0.000194327	0.000778481
K00037_3-alpha-hydroxysteroid_dehydrogenase	0	0	0	0	0	0	0	6.45e-06	0	0	0	0	0	0	0	0	0	0	0	0	0	0	0	0	0	0	0	0	0	0	0	0	0	0	0	0	0	0	0	0	0	0	0	0	0	0	0	0
K00039_ribitol_2-dehydrogenase	0	1.75e-06	0	0	0	0	0	0	0	0	0	0	0	0	0	0	0	0	0	0	0	0	0	0	0	0	0	0	0	0	0	0	0	0	0	0	0	0	0	0	0	0	0	0	0	0	0	0
K00040_fructuronate_reductase	0.000440505	0.000170249	0.000239632	0.000184922	0.000204279	0.000189399	0.000235339	0.000293725	0.000332963	0.000338869	0.000293548	0.000338478	0.000450115	0.000201415	0.000432872	0.000313319	0.00050149	0.000160013	0.000475066	0.000448689	0.000351847	0.000155712	0.000371268	0.000365463	0.000357126	0.000427468	0.000609065	0.000387904	0.000398554	0.00025749	0.000287821	0.000351896	0.000254354	0.000360794	0.000172114	0.000236266	0.000436633	0.000249211	0.00071421	0.000284739	0.000293497	0.000220681	0.000179784	0.000446787	0.000447928	0.000317913	0.00034944	0.000214853
K00041_tagaturonate_reductase	0.000270777	0.000144788	0.000196079	0.00145946	0.000252054	0.00070149	0.000960748	0.000422046	0.000146581	0.000207178	0.000473411	0.000247761	0.000534084	0.000379916	0.000489143	0.000783733	0.000577502	0.000191576	0.000435377	0.000377507	0.000250548	0.000141916	0.00046721	0.000382176	0.000303022	0.00034044	0.000498242	0.000311355	0.0002576	0.000261936	0.000303839	0.000287266	0.000278615	0.000301727	0.000310156	0.000184417	0.000375376	0.000292709	0.00069412	0.000173022	0.000255697	0.00024839	0.000164813	0.000332662	0.000269266	0.000188808	0.000376299	0.000230069
K00042_2-hydroxy-3-oxopropionate_reductase	7.26e-06	1.31e-05	1.52e-05	1.55e-05	3.13e-05	4.89e-06	7.37e-06	3.97e-05	0	2.48e-05	3.59e-05	0	1.51e-05	3.09e-05	1.16e-05	9.51e-05	5.66e-06	1.33e-05	4.25e-05	2.9e-05	7.85e-06	1.74e-05	2.19e-05	1.65e-05	1.75e-05	3.84e-06	1.19e-05	0	1.14e-05	0	2.67e-05	2.2e-05	3.13e-06	1.18e-05	1.16e-05	5.25e-05	0	3.46e-05	0	0	1.35e-05	0	0	0	3.1e-05	4.26e-06	1.02e-05	2.16e-05
K00043_4-hydroxybutyrate_dehydrogenase	0	2.29e-06	3.99e-06	6.13e-06	6.19e-06	5.8e-06	0	4.48e-06	0	4.93e-06	9.43e-06	0	0	0	9.05e-06	0	0	0	0	0	6.25e-06	0	0	0	0	6.1e-06	3.79e-06	0	1.12e-06	8.12e-06	7.54e-07	2.81e-06	0	1.88e-06	9.1e-07	9.77e-06	4.54e-06	0	0	0	0	0	0	0	0	3.33e-06	2.7e-06	5.67e-06
K00044_estradiol_17beta-dehydrogenase	0	0	0	0	0	0	0	0	0	0	0	0	0	0	0	0	0	0	0	0	0	8.45e-06	0	0	0	0	0	0	0	0	0	0	0	0	0	0	0	0	0	0	0	0	0	0	0	0	0	0
K00045_mannitol_2-dehydrogenase	0	8.54e-07	0	0	0	5.85e-06	0	0	0	7.45e-06	7.13e-06	4.34e-06	2.24e-06	0	0	8.07e-06	6.71e-06	0	0	3.66e-06	0	0	0	0	5.22e-06	1.82e-06	0	0	0	0	5.72e-07	1.14e-06	0	1.42e-06	0	0	0	0	0	0	0	0	0	0	0	0	1.02e-06	1.29e-05
K00046_gluconate_5-dehydrogenase	0.00136237	0.000649967	0.00110593	0.00240618	0.00133894	0.00234349	0.00359485	0.00149209	0.00226376	0.000995052	0.00206552	0.00102438	0.00184097	0.00192803	0.00208637	0.00245664	0.00242454	0.00104222	0.00173228	0.00177319	0.00178185	0.00101781	0.00222732	0.00224325	0.00119125	0.00138994	0.00200892	0.00124263	0.00144623	0.00106941	0.00218668	0.00127404	0.0013763	0.00161661	0.00150798	0.00222636	0.00173397	0.00107802	0.0027065	0.000714338	0.000996569	0.00147785	0.00105486	0.00158269	0.00142603	0.00124848	0.00214286	0.00156647
K00048_lactaldehyde_reductase	0.00139016	0.0013431	0.00094781	0.0017785	0.00131114	0.00146526	0.000881771	0.00113468	0.00154108	0.000965412	0.00100305	0.00109941	0.00074762	0.00105628	0.00127449	0.000735333	0.00143888	0.00132657	0.000858668	0.00128373	0.00130168	0.000806808	0.00119035	0.00103055	0.00147267	0.00103804	0.000693107	0.00131354	0.000918385	0.00129943	0.000979176	0.00111944	0.000966837	0.000979411	0.0010392	0.00121947	0.00083873	0.00136536	0.00142601	0.00115283	0.00105177	0.00119427	0.00144353	0.00119077	0.000950518	0.00141864	0.000995068	0.00147495
K00049_glyoxylate_reductase_(NADP+)	0	0	0	0	0	0	0	0	0	0	0	6.49e-06	0	0	0	0	0	0	0	0	0	0	0	0	0	0	0	0	0	0	0	0	0	0	0	0	0	0	0	0	0	0	0	0	0	0	0	0
K00050_hydroxypyruvate_reductase	5.22e-06	1.41e-05	2.16e-05	1.64e-05	1.12e-05	6.98e-06	0	1.2e-05	5.02e-06	1.31e-05	1.69e-05	2.52e-05	1.05e-05	0	8.02e-06	9.32e-06	7.9e-06	0	2.13e-05	1.01e-05	1.12e-05	1.22e-05	2.09e-05	5.84e-06	2.45e-05	2.16e-05	1.01e-05	3.72e-05	5.93e-06	0	1.42e-05	2.15e-05	2.17e-06	1.01e-05	1.2e-05	1.32e-05	2.42e-05	1.44e-05	2.66e-05	0	0	5.27e-06	2.16e-05	2.17e-05	2.41e-05	2.92e-06	1.46e-05	1.49e-05
K00051_malate_dehydrogenase_(NADP+)	0	0	0	0	0	0	0	0	0	0	0	0	0	0	0	0	4.75e-06	0	0	0	0	0	0	0	0	0	0	0	0	0	0	0	0	0	0	0	0	0	0	0	0	0	0	0	0	0	0	0
K00052_3-isopropylmalate_dehydrogenase	0.00134843	0.0017123	0.00124029	0.00138874	0.0013215	0.00160267	0.00115297	0.00170836	0.001281	0.00155818	0.00123312	0.00159566	0.00181498	0.00118013	0.00168414	0.000939441	0.00154175	0.00147938	0.00142824	0.00157397	0.00147877	0.00133706	0.00134501	0.00110536	0.00161197	0.00172374	0.00174129	0.00126934	0.0017867	0.00134827	0.00102383	0.00171415	0.00167782	0.00159169	0.00159394	0.00140631	0.00122554	0.00133466	0.00155678	0.00147299	0.00126515	0.00136383	0.00141343	0.00154299	0.00164877	0.00175933	0.00132077	0.00140211
K00053_ketol-acid_reductoisomerase	0.0024274	0.00354775	0.00238369	0.00258335	0.00261865	0.00291699	0.00218049	0.00362855	0.00292908	0.00334464	0.00277409	0.00311771	0.00264115	0.00191568	0.0022641	0.00178576	0.0017329	0.00259308	0.0019109	0.00231667	0.00271731	0.00254843	0.00219304	0.00200071	0.0030703	0.00320349	0.00275742	0.00251064	0.00308659	0.00264627	0.00201643	0.00342309	0.00301147	0.00344497	0.00307836	0.00238611	0.00201691	0.00213783	0.00246583	0.00272398	0.00230125	0.00228027	0.00322494	0.00265728	0.00282642	0.00363619	0.00227337	0.00242553
K00054_hydroxymethylglutaryl-CoA_reductase	5.07e-06	2.04e-06	2.47e-05	0	0	1.67e-06	3.83e-06	0	5.11e-06	0	0	0	0	0	0	0	0	0	0	5.07e-06	0	0	0	0	0	0	1.67e-06	0	0	7.11e-06	2e-06	3.11e-06	2.13e-06	0	3.92e-06	2.12e-06	8.05e-06	0	5.16e-06	0	9.41e-06	0	0	0	0	0	4.75e-06	0
K00055_aryl-alcohol_dehydrogenase	5.72e-06	6.83e-06	1.59e-05	0	1.23e-05	1.93e-06	0	0	0	0	0	5.71e-06	0	0	9.03e-06	0	0	0	0	1.14e-05	0	0	0	6.57e-06	0	0	2.08e-06	1.4e-05	4.45e-06	8.08e-06	9.91e-06	3.15e-06	2.5e-06	0	9.08e-07	2.43e-06	4.53e-06	4.48e-05	0	2.03e-05	0	5.93e-06	0	6.11e-06	3.02e-06	0	1.37e-06	0
K00057_glycerol-3-phosphate_dehydrogenase_(NAD(P)+)	0.00095254	0.00116386	0.000721307	0.00104147	0.000965483	0.00105501	0.000933879	0.00108783	0.000834577	0.00105083	0.000622767	0.00118491	0.0013922	0.000309851	0.0012864	0.000567389	0.00125411	0.000788828	0.0011986	0.000905831	0.00105371	0.000720474	0.000897563	0.0012341	0.00098718	0.0016267	0.00136345	0.00112476	0.00124548	0.000999144	0.000598137	0.00125637	0.00118425	0.00108827	0.000851585	0.000813238	0.000836853	0.000679555	0.00123517	0.000705279	0.000720546	0.000643804	0.00115679	0.000797821	0.00112472	0.00119289	0.000768556	0.000830631
K00058_D-3-phosphoglycerate_dehydrogenase	0.000879457	0.001377	0.000888212	0.000569791	0.000807849	0.000769921	0.000843279	0.00099939	0.000892808	0.00101674	0.00098736	0.00108949	0.00104006	0.00058822	0.00060434	0.000611215	0.000611104	0.000996366	0.000700501	0.000823206	0.000891581	0.000866662	0.000677148	0.000581789	0.00100059	0.000971061	0.000915536	0.00101086	0.00100361	0.0010936	0.000731315	0.00121454	0.000888698	0.00106461	0.000957797	0.000493868	0.000545431	0.000641799	0.000737481	0.000782156	0.000707336	0.000968658	0.00105863	0.000809128	0.000908451	0.00123539	0.000735111	0.000881277
K00059_3-oxoacyl-[acyl-carrier_protein]_reductase	0.000274934	0.000327555	0.000357297	0.000863894	0.000534852	0.000608307	0.000484853	0.000397675	0.000508822	0.000455247	0.000410356	0.000341591	0.000444592	0.000822842	0.000203268	0.000417436	0.000465054	0.000483583	0.000303648	0.000369144	0.000362482	0.000423441	0.000485544	0.000495515	0.000290857	0.000276499	0.00027482	0.000262538	0.000385703	0.000358368	0.000806051	0.000254642	0.000399689	0.000202264	0.000479722	0.000648641	0.000456862	0.000338744	0.000348452	0.000517166	0.000318907	0.000440717	0.000369613	0.000357527	0.000488055	0.000248203	0.000446614	0.000331227
K00060_threonine_3-dehydrogenase	3.12e-05	1.23e-06	3.9e-05	2.59e-05	1.34e-05	0	0.000125133	4.89e-06	0	5.24e-06	5.13e-05	1.21e-05	0	0.000106848	5.86e-05	4.63e-05	5.78e-05	3.46e-05	2.05e-05	4.99e-05	3.37e-05	4.43e-05	1.9e-05	8.58e-05	2.97e-05	0	2.04e-06	0	6.02e-06	2.64e-05	2.45e-05	7.1e-06	5.19e-06	1.64e-05	1.58e-05	2.6e-06	2.46e-05	0	6.52e-06	4.39e-05	6.99e-05	3.22e-05	0	1.99e-05	9.87e-06	1.82e-05	5.41e-05	5.53e-05
K00061_retinol_dehydrogenase	0	0	0	0	0	0	0	0	0	0	0	0	0	0	1e-05	0	0	0	0	0	0	0	0	0	0	0	0	0	0	0	0	0	0	0	0	0	0	0	0	0	0	0	0	0	0	0	0	0
K00064_D-threo-aldose_1-dehydrogenase	0	0	0	0	0	0	0	0	0	0	0	0	0	0	0	0	0	0	0	0	0	0	0	0	0	0	0	0	0	0	0	0	0	0	0	0	0	0	0	7.44e-06	0	0	0	0	0	0	0	0
K00065_2-deoxy-D-gluconate_3-dehydrogenase	1.68e-05	6.67e-06	0	8.55e-06	0	2.75e-06	8.21e-06	0	0	0	0	0	2.58e-05	0	0	1.56e-05	0	7.59e-06	2.81e-05	8.16e-06	1.83e-05	1.96e-05	0	0	0	0	2.8e-06	0	8.08e-06	0	4.37e-06	1.77e-05	7.15e-06	5.36e-06	2e-05	1.07e-05	0	2.37e-05	8.86e-06	0	0	0	0	0	0	4.86e-06	5.92e-06	0
K00066_GDP-mannose_6-dehydrogenase	1.95e-05	0	6.76e-06	5.18e-06	1.03e-05	3.29e-06	3.92e-05	0	0	0	8.01e-06	0	0	2.75e-05	1.51e-05	9.02e-06	3.76e-06	1.35e-05	2.02e-05	1.46e-05	0	5.75e-06	0	5.6e-06	0	0	3.22e-06	0	1.87e-06	0	9.57e-06	0	0	3.19e-06	0	0	0	0	0	5.76e-06	0	1.01e-05	0	0	0	8.5e-06	1.59e-05	0
K00067_dTDP-4-dehydrorhamnose_reductase	0.000725705	0.000743874	0.00114445	0.000912289	0.000640431	0.000903742	0.000570819	0.000941063	0.00123913	0.00101759	0.000873238	0.000702784	0.000985641	0.000736646	0.000591707	0.000832133	0.000420158	0.000700421	0.000435307	0.000928583	0.000837827	0.000636706	0.000790999	0.000896124	0.00077913	0.00102934	0.00109242	0.000869111	0.00102943	0.00077818	0.000742291	0.00130439	0.00102191	0.00101977	0.00102654	0.00113397	0.000865767	0.000894596	0.000755975	0.000539563	0.000830898	0.000720536	0.000686797	0.000848645	0.000659	0.00093743	0.000691612	0.000726538
K00068_sorbitol-6-phosphate_2-dehydrogenase	3.94e-05	1.57e-06	5.47e-06	0	8.49e-06	0	0	6.1e-06	0	0	0	0	0	0	0	0	0	0	3.28e-05	7.86e-06	8.95e-06	0	2.38e-05	1.82e-05	0	4.18e-06	0	1.91e-05	0	0	3.2e-06	4.28e-06	0	0	0	0	0	7.51e-06	8.21e-06	9.85e-06	2.94e-05	0	1.1e-05	0	4.35e-06	0	0	0
K00069_15-hydroxyprostaglandin_dehydrogenase_(NAD)	0	0	0	0	0	0	0	0	0	0	0	0	0	0	0	0	0	0	0	0	0	0	0	0	0	0	0	0	0	0	0	0	0	0	0	0	0	0	0	0	0	0	0	0	0	0	1.37e-06	0
K00070_3beta-hydroxy-delta5-steroid_dehydrogenase_/_steroid_delta-isomerase	0	0	0	0	0	0	0	0	0	0	0	0	0	0	0	0	0	0	0	0	0	0	0	0	0	0	0	0	0	0	0	0	0	0	0	0	0	0	0	0	0	0	0	0	0	0	1.34e-06	0
K00071_11beta-hydroxysteroid_dehydrogenase	0	0	0	0	0	0	0	0	0	0	0	0	0	0	0	0	0	0	0	0	0	0	7.38e-06	0	0	0	0	0	0	0	0	0	0	0	0	0	0	0	0	0	0	0	0	0	0	0	0	0
K00073_ureidoglycolate_dehydrogenase	6.1e-06	2.43e-06	0	0	0	0	0	2.38e-05	3.66e-05	0	0	0	0	0	9.62e-06	1.13e-05	0	0	5.31e-06	6.1e-06	1.33e-05	0	0	0	0	6.47e-06	4.02e-06	0	1.19e-06	0	7.24e-06	1.24e-05	1.3e-05	0	3.48e-05	0	0	1.16e-05	0	7.2e-06	1.14e-05	0	8.6e-06	0	0	1.06e-05	1.43e-06	6.04e-06
K00074_3-hydroxybutyryl-CoA_dehydrogenase	0.00029045	0.000324074	0.000539048	0.000583133	0.000527704	0.00037034	0.000566571	0.00035452	0.000464411	0.00058832	0.000540419	0.000531128	0.000404413	0.000403988	0.000430922	0.000894249	0.000238018	0.000355409	0.000546943	0.000447479	0.000720682	0.000363599	0.00048895	0.000553518	0.000588294	0.000216228	0.000501751	0.000375562	0.000516361	0.000528592	0.000334665	0.000611878	0.000861345	0.000712313	0.000578343	0.000411423	0.000446303	0.000477086	0.00099904	0.000372457	0.000916558	0.000419969	0.0005817	0.00139561	0.000573556	0.000321023	0.000633073	0.000338157
K00075_UDP-N-acetylmuramate_dehydrogenase	0.000211926	0.000320283	0.000227902	0.000258201	0.000200757	0.000218131	0.000171164	0.00023027	0.000285995	0.000327003	0.000216218	0.000308249	0.000302335	0.000111564	0.000239982	0.000150119	0.00031612	0.000219624	0.000274107	0.000186197	0.000218168	0.000199015	0.000203861	0.000233246	0.000321469	0.000374479	0.000312239	0.00019511	0.000306908	0.00018071	0.000173458	0.000350169	0.000332218	0.000309897	0.000294759	0.000208011	0.000188145	0.000345972	0.000337266	0.000250141	0.000260802	0.000218123	0.000320888	0.00026656	0.000243732	0.000280217	0.000179079	0.000239816
K00076_7-alpha-hydroxysteroid_dehydrogenase	3.24e-05	6.53e-06	1.68e-05	2.62e-05	7.96e-05	1.63e-05	0	3.14e-05	5.63e-05	2.09e-05	1.31e-05	4.01e-05	2.53e-05	2.29e-05	2.52e-05	0	2.48e-05	0	1.35e-05	8.08e-06	2.63e-05	2.86e-05	9.83e-05	1.84e-05	1.94e-05	2.56e-05	5.3e-06	0	3.13e-06	3.42e-05	1.19e-05	1.43e-05	4.57e-05	7.91e-06	7.41e-05	1.7e-05	1.26e-05	0	8.33e-06	0	0.000106392	8.49e-06	0	2.58e-05	2.14e-05	1.41e-05	4.35e-05	2.44e-05
K00077_2-dehydropantoate_2-reductase	0.000194898	0.000579422	0.000233741	6.92e-05	0.000203635	5.9e-05	3.22e-05	5.1e-05	3.92e-05	0.000307986	8.44e-05	0.000199059	6.68e-05	9.24e-05	8.65e-05	3.7e-05	4.35e-05	0.000367717	8.43e-05	0.000253676	0.000147763	0.000170834	9.89e-05	7.58e-05	0.000171363	0.000249334	0.000261323	0.000129832	0.000114778	0.000185703	6.68e-05	9.99e-05	0.000202393	8.88e-05	0.00018011	0.000139014	4.52e-05	0.000108538	0.000166895	0.000119254	0.000156831	5.47e-05	0.000358258	0.000167545	0.000219808	0.000110468	7.37e-05	0.000501357
K00078_D-xylose_1-dehydrogenase_(NADP)	0	0	0	0	0	0	0	0	0	0	0	0	0	0	0	0	0	0	0	0	0	0	0	0	0	0	0	0	0	0	0	0	0	0	0	0	0	0	0	0	0	0	0	0	0	0	1.25e-06	0
K00079_carbonyl_reductase_(NADPH)	0	0	0	0	0	0	0	0	0	0	0	0	0	0	0	0	0	0	0	0	0	0	0	0	0	0	0	0	0	0	0	0	0	0	0	0	0	0	0	0	0	0	0	0	0	0	1.46e-06	0
K00081_prostaglandin-E2_9-reductase	0	0	0	0	0	0	0	0	0	0	0	0	0	0	0	0	0	0	0	0	0	0	0	0	0	0	0	0	0	0	0	0	0	0	0	0	0	0	0	0	0	0	0	0	0	0	1.46e-06	0
K00082_5-amino-6-(5-phosphoribosylamino)uracil_reductase	8.9e-06	8.85e-06	6.17e-06	0	9.59e-06	2.99e-06	0	0	0	1.52e-05	2.92e-05	0	0	0	0	0	0	0	0	0	0	2.1e-05	0	0	5.34e-06	1.89e-05	1.47e-05	0	0	0	8.19e-06	1.18e-05	0	2.91e-06	1.27e-05	1.51e-05	0	2.54e-05	2.78e-05	2.1e-05	0	9.22e-06	0	8.55e-05	1.41e-05	5.16e-06	4.17e-06	0
K00083_cinnamyl-alcohol_dehydrogenase	0	0	0	0	0	0	0	0	0	0	0	0	0	0	0	0	0	0	0	0	0	0	0	0	0	0	0	0	0	0	0	0	0	0	0	0	0	0	0	0	0	6.21e-07	0	0	0	0	0	0
K00084_15-hydroxyprostaglandin_dehydrogenase_(NADP)	0	0	0	0	0	0	0	0	0	0	0	0	0	0	0	0	0	0	0	0	0	0	0	0	0	0	0	0	0	0	0	0	0	0	0	0	0	0	0	0	0	0	0	0	0	0	1.46e-06	0
K00085_aldose-6-phosphate_reductase_(NADPH2)	0	0	0	0	0	0	0	0	0	0	0	0	0	0	0	0	5.33e-06	0	0	0	0	0	0	0	0	0	0	0	0	0	0	0	0	0	0	0	0	0	0	0	0	0	0	0	0	0	0	0
K00086_1,3-propanediol_dehydrogenase	0	1.65e-05	0	8.6e-06	5.98e-06	8.05e-08	5.61e-06	0	5.47e-06	4.88e-06	0	0	7.58e-08	0	3.44e-07	1.53e-05	8.54e-06	1.77e-05	6.38e-08	5.46e-06	1.05e-06	1.31e-05	0	6.21e-06	3.2e-06	8.38e-08	2.68e-06	0	1.39e-06	0	0	2.33e-06	4.6e-08	0	7.3e-06	4.63e-06	4.49e-06	5.15e-06	7.96e-08	5.44e-07	0	3.71e-06	0	1.2e-05	0	0	1.98e-06	5.41e-06
K00087_xanthine_dehydrogenase	0	7.23e-06	1.16e-05	5.96e-06	3.01e-06	8.47e-06	2.81e-06	6.55e-06	0	4.79e-06	4.58e-06	1.12e-05	5.75e-06	1.19e-05	0	5.19e-06	4.32e-06	7.72e-06	1.63e-05	8.37e-06	6.07e-06	9.92e-06	2.82e-06	9.64e-06	1.51e-05	5.93e-06	2.76e-06	6.81e-06	2.72e-06	3.95e-06	1.17e-05	7.92e-06	9.54e-06	2.64e-06	8.86e-06	1.31e-05	1.77e-05	1.33e-05	1.16e-05	2.64e-05	1.57e-05	2.32e-05	1.18e-05	5.97e-06	4.43e-06	4.87e-06	1.96e-05	1.93e-05
K00088_IMP_dehydrogenase	0.0024437	0.00232258	0.00221182	0.00277693	0.00240862	0.00235265	0.00223101	0.00217476	0.00264082	0.00233959	0.00219807	0.00240817	0.00223791	0.00245304	0.00262659	0.0024359	0.00278494	0.0024174	0.00226607	0.00233096	0.00260413	0.00217987	0.00248069	0.00259523	0.0023176	0.00233407	0.00246341	0.00276211	0.00223286	0.00295326	0.00223242	0.00234996	0.00253547	0.00248465	0.00232472	0.00227137	0.00232288	0.00295823	0.00281388	0.00220511	0.00219519	0.00228675	0.00264486	0.00266776	0.0023318	0.00243191	0.00228816	0.00236941
K00089_3alpha-hydroxysteroid_dehydrogenase_(A-specific)	0	0	0	0	0	0	0	1.03e-05	0	0	0	0	0	0	0	0	0	0	0	0	0	0	0	0	0	0	0	0	0	0	0	0	0	0	0	0	0	0	0	0	0	0	0	0	0	0	0	0
K00090_gluconate_2-dehydrogenase	0	0	0	0	7.06e-06	0	0	0	0	0	0	0	0	0	0	0	0	0	5.44e-06	0	0	0	0	0	0	0	0	0	0	0	5.15e-06	2.3e-06	0	6.46e-07	0	2.35e-06	0	0	0	0	0	0	0	0	0	0	0	0
K00091_dihydroflavonol-4-reductase	0	1.26e-06	0	6.75e-06	0	2.13e-06	0	0	0	0	0	0	0	0	0	0	0	0	0	0	0	0	0	0	0	0	0	0	0	0	1.67e-06	5.61e-07	0	0	1e-06	2.69e-06	0	6.04e-06	6.6e-06	0	0	0	0	0	0	3.68e-06	4.45e-06	0
K00092_chlordecone_reductase	0	0	0	0	0	0	0	6.45e-06	0	0	0	0	0	0	0	0	0	0	0	0	0	0	0	0	0	0	0	0	0	0	0	0	0	0	0	0	0	0	0	0	0	0	0	0	0	0	0	0
K00094_galactitol-1-phosphate_5-dehydrogenase	0	0	0	0	0	0	0	0	0	0	0	0	0	0	0	0	4.76e-06	0	0	6.16e-06	0	0	0	0	0	0	2.03e-06	0	0	0	5.68e-06	0	0	0	0	0	0	0	0	1.46e-05	0	0	0	0	0	0	0	0
K00096_glycerol-1-phosphate_dehydrogenase_[NAD(P)]	1.8e-05	8.26e-06	2.94e-05	1.29e-05	7.74e-05	8.12e-06	1.82e-05	1.41e-05	2.41e-05	5.68e-05	1.98e-05	3.01e-05	4.65e-05	8.89e-06	8.57e-06	6.72e-05	1.4e-05	1.11e-05	1.01e-05	0	3.27e-05	1.45e-05	1.24e-05	4.87e-05	2.54e-05	2.36e-06	1.99e-05	1.47e-05	2.7e-05	4.26e-05	1.18e-05	3.72e-05	3.83e-05	3.15e-05	2.26e-05	7.66e-06	2.35e-05	1.6e-05	2.99e-05	1.41e-05	4.51e-05	6.25e-06	2.45e-05	5.8e-05	2.24e-05	1.38e-05	3.8e-05	1.18e-05
K00097_4-hydroxythreonine-4-phosphate_dehydrogenase	8.96e-05	9.75e-05	9.59e-05	0.000223	0.000136165	0.000130569	0.000223283	0.000104845	0.000164089	0.000140444	0.000120072	0.000114913	0.000132488	0.00019629	0.000110642	0.000119292	0.000112411	0.00012502	0.000175569	0.000118123	0.000165885	0.000118947	0.000186938	0.00013655	6.13e-05	0.000208347	0.000132038	0.000156888	0.000127641	0.000100241	0.00020837	0.000128333	0.000154566	0.000108464	0.000176922	0.000192142	0.000141201	0.000114044	0.000190031	0.000100572	7.85e-05	0.000193347	0.000249191	0.000263728	0.000141049	0.00016832	0.000160638	0.000155389
K00098_L-idonate_5-dehydrogenase	0	0	0	0	6.63e-06	0	0	0	0	0	0	0	0	0	0	0	0	0	5.2e-06	0	0	0	0	0	0	3.39e-06	0	0	0	0	8.18e-07	1.1e-06	0	0	0	0	0	0	0	0	0	0	0	0	0	0	0	0
K00099_1-deoxy-D-xylulose-5-phosphate_reductoisomerase	0.000757317	0.000944618	0.000716535	0.000730302	0.000620782	0.000767721	0.000671157	0.000820029	0.000753878	0.000756248	0.00052171	0.000903247	0.000880408	0.000619609	0.00074157	0.000791381	0.000836443	0.000736638	0.000778962	0.000780094	0.000751155	0.00066797	0.000583707	0.000570391	0.000784859	0.000893845	0.00092269	0.000898129	0.000880407	0.000696424	0.000584089	0.000877517	0.000709604	0.000913501	0.000775711	0.000725857	0.000665393	0.000637182	0.000710688	0.000742724	0.000502338	0.00059833	0.000796125	0.000522526	0.000737384	0.000928521	0.000706426	0.000831933
K00100	0.000933985	0.000407481	0.000712343	0.000548792	0.000646847	0.000574298	0.000430142	0.000215626	0.000454167	0.000922995	0.000417922	0.000631212	0.00045795	0.000661155	0.000947246	0.000663072	0.000663376	0.000671465	0.000668279	0.000907878	0.000602505	0.00119563	0.000994687	0.000883941	0.000516788	0.000629277	0.000508085	0.000756419	0.000470386	0.000469722	0.000725201	0.000399381	0.000251993	0.000441511	0.000526852	0.00172312	0.00124696	0.000936872	0.000800069	0.000534005	0.000854989	0.000729812	0.000479524	0.000679616	0.000490165	0.000590208	0.000899625	0.00106274
K00101_L-lactate_dehydrogenase_(cytochrome)	0	3.23e-06	3.89e-06	5.98e-06	1.21e-05	1.88e-06	1.02e-06	1.47e-06	1.71e-07	9.6e-06	0	7.02e-06	0	5.92e-06	1.89e-06	0	0	1.02e-05	9.19e-07	1.6e-05	6.45e-06	7.81e-06	5.65e-06	6.43e-06	0	2.97e-06	3.68e-06	2.65e-05	2.07e-06	7.91e-06	1.26e-05	1.1e-05	0	3.11e-07	4.34e-06	1.98e-06	8.77e-06	3.52e-07	5.05e-06	2.83e-06	2.09e-05	1.73e-05	0	0	1.33e-07	0	3.86e-06	0
K00102_D-lactate_dehydrogenase_(cytochrome)	0	0	0	0	0	0	0	0	0	1.93e-06	0	0	1.86e-06	0	0	0	0	0	0	0	0	0	4.24e-06	0	0	2.38e-06	0	0	8.96e-07	0	2.86e-07	7.97e-07	0	0	7.15e-07	1.99e-06	0	0	0	0	0	0	0	0	0	0	0	0
K00104_glycolate_oxidase	2.7e-05	3.89e-05	3.46e-05	2.91e-05	0.000117965	3.24e-05	9.18e-06	2.49e-05	2.77e-05	2.75e-05	4.5e-05	5.43e-05	3.98e-05	9.1e-05	7.23e-05	5.1e-05	8.43e-05	2.5e-05	7.59e-05	2.75e-05	7.42e-05	4.85e-05	6.45e-05	4.18e-05	4.1e-05	3.89e-05	3.29e-05	7.71e-05	3.56e-05	8.39e-05	5.15e-05	4.23e-05	4.83e-05	4.15e-05	0.00010653	6e-05	5.07e-05	0.000165354	0.000127658	5.4e-05	6.83e-05	8.46e-05	3.79e-05	7.29e-05	3.61e-05	2.1e-05	8e-05	8.44e-05
K00105_alpha-glycerophosphate_oxidase	0	0	0	0	0	0	0	0	0	0	0	0	0	0	0	0	0	0	0	0	0	0	0	0	0	1.24e-06	0	0	0	0	0	3.1e-07	0	0	5.56e-07	0	0	0	0	0	0	0	0	0	0	0	0	0
K00106_xanthine_oxidase	0	0	0	0	0	0	0	0	0	0	0	0	0	2.04e-06	0	0	0	0	0	0	0	0	0	0	0	0	0	0	2.79e-07	0	0	0	0	5.18e-07	0	0	0	0	0	0	0	0	0	0	8.38e-07	0	0	0
K00108_choline_dehydrogenase	0	7.71e-07	0	3.88e-06	0	0	0	0	0	0	1.22e-05	0	0	0	9.22e-06	0	0	0	9.42e-06	3.76e-06	4.08e-06	9.12e-06	0	8.98e-06	0	0	0	0	2.09e-06	0	6.68e-06	5.17e-06	1.58e-06	0	2.43e-06	1.62e-06	0	3.01e-06	0	1.37e-05	3.62e-06	7.89e-06	0	0	0	0	1.81e-06	0
K00109_2-hydroxyglutarate_dehydrogenase	0	0	0	0	0	0	0	0	0	0	0	0	0	0	0	0	0	0	0	0	0	0	0	0	0	0	0	0	0	0	0	0	0	0	8.28e-07	0	0	0	0	0	0	0	0	0	0	0	1.08e-06	0
K00111_glycerol-3-phosphate_dehydrogenase	0.000143254	0.00011067	0.000169643	0.000127558	0.000142633	0.000170437	0.000121398	0.000128078	0.000191541	0.00013468	0.00016388	0.000131018	6.18e-05	0.000248908	0.000133362	0.000157666	0.000137804	0.00017355	0.000142003	0.000128752	0.000152343	0.000325963	0.000211882	0.000128789	0.000144074	9e-05	7.9e-05	0.000193642	8.49e-05	0.000132369	0.000241844	8.86e-05	9.8e-05	9.36e-05	0.000120577	0.000251839	0.000225166	0.000138176	0.000129311	0.000180338	0.000187937	0.000199332	0.000278918	0.000147557	0.000107427	6.68e-05	0.000126267	0.000180588
K00112_glycerol-3-phosphate_dehydrogenase_subunit_B	9.76e-06	9.59e-07	6.86e-06	0	1.08e-05	0	0	0	0	0	0	0	0	0	7.79e-06	0	3.81e-06	1.37e-05	1.64e-05	4.93e-06	5.38e-06	5.92e-06	0	0	0	0	1.63e-06	0	0	0	9.68e-06	4.38e-07	2.13e-06	0	0	0	7.82e-06	0	0	1.74e-05	0	5.12e-06	0	1.06e-05	0	0	3.47e-06	4.88e-06
K00113_glycerol-3-phosphate_dehydrogenase_subunit_C	4.15e-05	2.38e-05	0.00012928	1.66e-05	4.99e-05	7.56e-05	2.11e-05	3.24e-05	8.85e-05	4.94e-05	6.01e-05	4.66e-05	2.64e-05	5.83e-05	2.45e-05	7.69e-05	4.82e-05	8.57e-05	5.2e-05	5.67e-05	3.93e-05	0.000203672	7.83e-05	7.8e-05	5.95e-05	1.11e-05	2.22e-05	0	2.95e-05	3.66e-05	0.000101699	2.3e-05	1.55e-05	3.92e-05	5.42e-05	0.000117253	0.00010609	9.57e-06	2.7e-05	4.88e-05	4.81e-05	8.05e-05	6.56e-05	2.68e-05	2.48e-05	1.2e-05	4.62e-05	5.66e-05
K00114_alcohol_dehydrogenase_(acceptor)	0	0	2.42e-06	0	0	0	0	0	0	0	6.16e-06	0	0	0	0	0	5.65e-06	0	0	0	0	3.96e-06	0	0	0	0	2.32e-06	0	0	0	1.72e-06	1.49e-06	0	0	0	1.5e-06	0	0	7.7e-06	0	6.44e-06	0	0	0	0	0	1.66e-06	2.91e-06
K00116_malate_dehydrogenase_(acceptor)	0	1.76e-06	2.95e-06	5.63e-06	2.41e-05	1.41e-06	0	0	0	1.22e-05	0	0	0	0	6.73e-06	7.15e-06	6.98e-06	3.85e-06	3.5e-06	0	4.19e-06	5e-06	0	6.07e-06	7.92e-06	0	1.42e-06	0	2.5e-06	0	4.56e-06	1.94e-06	6.09e-06	0	1.5e-05	4.01e-06	3.73e-06	0	4.48e-06	9.24e-06	1.78e-05	0	0	5.06e-06	4.79e-06	0	1.02e-06	9.41e-06
K00117_quinoprotein_glucose_dehydrogenase	0	5.18e-07	0	0	5.82e-06	0	0	0	0	0	0	5.29e-06	0	0	0	0	2.05e-06	2.41e-06	4.45e-06	5.29e-06	3.31e-06	4.41e-06	0	6.01e-06	0	0	0	6.53e-06	0	4.32e-06	5.57e-06	4.07e-06	0	0	3.96e-07	1.12e-06	0	0	5.84e-06	9.45e-06	0	2.76e-06	0	0	0	0	3.15e-06	0
K00119	0	0	0	0	0	0	0	0	0	0	0	0	0	0	3.14e-06	0	3.03e-06	0	0	0	0	3.35e-07	0	0	0	0	0	0	1.39e-07	5.63e-06	1.33e-06	1.69e-06	0	0	6.22e-07	0	0	6.24e-07	4.09e-06	0	3.62e-06	4.38e-06	0	0	0	0	0	0
K00120	0	0	0	0	0	0	0	0	0	0	0	0	0	0	0	1.69e-06	0	0	0	0	0	0	0	0	0	2.9e-06	0	0	0	0	0	0	0	0	0	0	0	0	0	0	0	0	0	0	0	0	0	0
K00121_S-(hydroxymethyl)glutathione_dehydrogenase	0	1.15e-06	4.27e-06	6.12e-06	2.93e-06	1.95e-06	2.81e-06	0	0	0	9.49e-06	5.77e-06	0	1.21e-05	0	1.05e-05	2.64e-05	0	4.77e-06	2e-05	3.93e-06	6.84e-06	0	6.65e-06	0	4.5e-06	3.79e-06	2.09e-05	7.23e-06	0	1.16e-05	2.75e-05	0	0	1.8e-06	1.11e-05	4.47e-06	0	1.19e-05	3.37e-05	2.15e-05	0	0	6.03e-06	0	0	3.99e-06	1.7e-05
K00122_formate_dehydrogenase	0	0	0	0	0	0	0	0	0	0	0	0	0	0	0	0	0	0	0	0	0	0	0	2.52e-06	0	0	0	0	8.36e-07	0	0	7.62e-07	0	0	1.35e-06	0	0	3.96e-06	0	0	0	0	4.17e-06	0	0	0	0	0
K00123_formate_dehydrogenase,_alpha_subunit	2.45e-05	8.03e-05	3.38e-05	3.78e-05	0.000149202	1.39e-05	2.72e-05	3.72e-05	7.67e-05	7.5e-05	1.92e-05	3.44e-05	7.61e-05	3.58e-05	5.24e-05	2.4e-05	4.25e-05	8.46e-05	0.000108647	5.46e-05	8.8e-05	5.49e-05	3.66e-05	3.87e-05	5.38e-05	6.26e-05	3.8e-05	0.000115269	2.36e-05	3.51e-05	9.25e-05	8.75e-05	9.97e-05	2.89e-05	0.00022505	6.64e-05	5.25e-05	7.41e-05	7.35e-05	6.05e-05	0.000146531	6.96e-05	9.96e-05	6.7e-05	7.53e-05	4e-05	3.27e-05	0.000100119
K00124_formate_dehydrogenase,_beta_subunit	4.79e-05	7.89e-06	1.45e-05	1.17e-05	0.000113094	7.73e-06	1.04e-05	1.66e-05	5.45e-05	4.27e-05	0	1.05e-05	4.35e-05	3.15e-05	2.76e-05	0	4.68e-05	4.07e-05	1.77e-05	3.28e-05	2.3e-05	5.94e-05	6.04e-05	4.68e-05	1.33e-05	1.16e-05	6.9e-06	5.12e-05	1.94e-05	4.62e-05	8.3e-05	1.88e-05	8.67e-05	1.51e-05	0.000166438	4.22e-05	4.69e-05	1.01e-05	2.26e-05	8.52e-06	0.000102283	1.42e-05	3.01e-05	1.14e-05	5.61e-05	1.25e-05	8.12e-06	3.14e-05
K00125_formate_dehydrogenase,_beta_subunit	0	0	0	0	0	0	0	0	0	0	0	0	0	0	0	0	0	0	0	0	0	0	0	0	0	0	0	0	0	0	0	4.57e-07	0	0	0	0	0	0	0	0	0	0	0	0	0	0	0	0
K00127_formate_dehydrogenase,_gamma_subunit	6.59e-06	2.73e-05	4.28e-06	0	4.6e-05	1.05e-06	0	0	8.37e-06	3.08e-05	0	0	3.27e-05	0	0	0	0	1.38e-05	0	0	3.74e-05	7.79e-06	6.65e-06	4.01e-06	8.8e-06	1.01e-05	4.93e-06	0	1.63e-06	1.29e-05	2.22e-05	1.46e-05	5.65e-05	0	9.81e-05	2.46e-05	2.76e-06	1.6e-05	0	0	2.01e-05	5.54e-06	2.15e-05	5.71e-06	3.71e-05	7.83e-06	3.08e-06	0
K00128_aldehyde_dehydrogenase_(NAD+)	0.000104888	4.02e-05	8.17e-05	2.88e-05	8.69e-05	3.29e-05	5.26e-05	3.09e-05	3.65e-05	5.7e-05	8.48e-05	5.85e-05	1.87e-05	0.000104187	4.34e-05	0.000102941	7.13e-05	6.78e-05	0.00010978	0.00012718	5.08e-05	8.11e-05	0.000111543	0.000135935	5.09e-05	4.22e-05	2.94e-05	7.56e-05	2.42e-05	0.000169615	5.39e-05	4.39e-05	3.56e-05	4.44e-05	6.2e-05	0.000109654	8.37e-05	8.81e-05	6.47e-05	0.00010242	8.59e-05	9.16e-05	7.17e-05	0.000107496	4.26e-05	2.36e-05	8.57e-05	0.000123537
K00129_aldehyde_dehydrogenase_(NAD(P)+)	1.56e-06	1.06e-08	0	5.96e-08	0	0	0	0	0	0	0	0	0	6.61e-06	0	0	0	4.22e-06	2.45e-07	0	0	0	0	0	2.49e-06	0	0	0	1.11e-06	1.66e-06	2.74e-07	8.64e-07	0	8.66e-08	5.32e-08	0	2.65e-07	0	0	0	0	0	0	5.04e-06	0	0	0	5.46e-08
K00130_betaine-aldehyde_dehydrogenase	2.02e-05	1.25e-05	2.43e-05	1.87e-05	9.33e-06	6.56e-06	2.82e-05	1.35e-05	1.73e-05	1.11e-05	9.23e-05	3.88e-05	0	2.46e-05	5.86e-06	4.01e-05	2.46e-05	2.39e-05	3.65e-05	1.3e-05	9.39e-06	3.6e-05	2.62e-05	5.26e-06	2.34e-05	4.89e-06	2.43e-05	2.15e-05	1.13e-05	8.85e-06	2.23e-05	1.37e-05	7.4e-05	0.000110101	8.97e-05	5.32e-06	3.08e-05	3.71e-05	7.68e-05	6.14e-05	3.06e-05	3.49e-05	6.22e-06	3.25e-05	1.15e-05	2.26e-05	2.29e-05	3.91e-05
K00131_glyceraldehyde-3-phosphate_dehydrogenase_(NADP)	4.48e-06	6.24e-06	6.22e-06	0	0	0	0	6.94e-06	0	0	7.36e-06	0	0	0	0	0	1.19e-05	4.13e-06	0	4.47e-06	0	3.73e-06	4.52e-06	0	2.69e-06	7.12e-06	5.9e-06	1.09e-05	1.05e-07	3.77e-05	1.16e-06	1.59e-06	0	4.39e-06	0	0	3.55e-06	8.53e-06	0	5.3e-06	0	0	0	0	2.37e-06	0	7.7e-07	8.85e-06
K00132_acetaldehyde_dehydrogenase_(acetylating)	8.23e-07	5.58e-06	3.36e-06	8.89e-06	0	2.45e-06	4.27e-06	1.06e-06	1.03e-06	3.2e-06	0	8.2e-07	4.23e-07	0	0	0	6.42e-06	6.05e-06	6.94e-06	6.24e-07	8.93e-07	1.6e-06	4.71e-06	1.17e-06	2.22e-06	2.88e-06	1.06e-06	2e-06	4.51e-06	1.16e-06	2.32e-06	2.07e-06	2.1e-06	1.2e-06	5.29e-06	3.46e-06	0	0	0	1.21e-06	0	5.12e-06	0	0	3.3e-07	9.5e-06	3.95e-06	2.15e-06
K00133_aspartate-semialdehyde_dehydrogenase	0.00163066	0.00185947	0.00190763	0.00184004	0.0017386	0.00174947	0.00205844	0.00196359	0.00170456	0.00190922	0.00169392	0.00203858	0.00225821	0.00146218	0.00183521	0.00186591	0.0020325	0.00170663	0.00198535	0.00188433	0.00195895	0.00171532	0.00173138	0.0020112	0.00213392	0.00219085	0.00214605	0.00217663	0.00197876	0.00190212	0.00152415	0.00210011	0.00194425	0.00231724	0.00201169	0.00166328	0.00209917	0.00208726	0.00230635	0.00193398	0.0021759	0.0018316	0.00174946	0.00229204	0.00179436	0.00210899	0.00207582	0.00191688
K00134_glyceraldehyde_3-phosphate_dehydrogenase	0.00450258	0.00258978	0.00471563	0.00451463	0.00467668	0.00374291	0.00416996	0.00290052	0.00437508	0.00310127	0.00501695	0.00317211	0.00154902	0.00461989	0.00477208	0.00546052	0.00515664	0.00531657	0.00487231	0.0046328	0.00338046	0.00546051	0.00474482	0.00504075	0.00372043	0.00203525	0.00201458	0.00372788	0.00279222	0.00398051	0.00496998	0.00255164	0.00346303	0.00285136	0.00367428	0.00485267	0.00506201	0.00463119	0.00265506	0.00311356	0.00510123	0.00438885	0.00335841	0.00340462	0.00301836	0.00294931	0.00470526	0.00486207
K00135_succinate-semialdehyde_dehydrogenase_(NADP+)	4.61e-06	1.36e-05	1.91e-05	0	9.34e-06	1.45e-06	0	2.55e-05	0	7.77e-06	0	4.41e-06	0	6.07e-06	0	4.18e-05	1.37e-05	3.92e-06	7.4e-06	1.38e-05	4.19e-06	1.08e-05	8.56e-06	2.03e-05	0	2.26e-06	0	0	1.15e-05	1.32e-05	5.26e-06	1.16e-05	3.85e-06	1.52e-06	8.73e-06	1.5e-05	0	1.28e-05	0	3.02e-05	0	9.01e-06	6.31e-06	5.06e-06	2.29e-06	8.1e-06	3.18e-06	4.4e-06
K00136_malonate-semialdehyde_dehydrogenase_(acetylating)	0	0	0	0	0	0	0	0	0	0	0	0	0	0	0	3.5e-07	0	0	0	0	1.84e-07	0	0	0	0	0	0	0	0	0	0	0	0	0	0	9.33e-08	0	0	4.72e-07	0	0	0	0	0	0	0	0	0
K00137_aminobutyraldehyde_dehydrogenase	0	8.86e-07	0	0	0	7.41e-07	4.5e-06	0	0	0	0	0	0	0	0	0	0	0	1.11e-05	0	9.71e-06	5.25e-06	0	0	0	0	0	0	0	0	5.34e-06	1.2e-06	3.49e-06	0	0	3.83e-06	0	1.49e-07	0	5.64e-06	0	0	0	0	0	0	2.11e-06	0
K00138_lactaldehyde_dehydrogenase	1.45e-07	4.03e-07	2.06e-07	2.31e-07	3.21e-07	8.57e-08	0	8.16e-07	1.45e-07	9.6e-07	0	4.23e-06	0	0	1.91e-07	0	1.2e-07	0	1.46e-05	9.88e-06	1.48e-06	2.69e-07	0	0	5.92e-07	1.34e-06	5.84e-08	0	1.45e-07	0	4.91e-06	2.5e-06	7.48e-08	1e-07	1.47e-07	8.42e-07	0	1.1e-07	1.35e-07	2.06e-06	0	1.5e-07	0	2.58e-07	3e-07	9.2e-08	2.14e-07	2e-06
K00139_succinate-semialdehyde_dehydrogenase	0	0	0	0	0	0	0	0	0	0	0	0	0	0	0	0	0	0	3.12e-06	0	0	0	0	0	0	0	0	0	0	0	0	0	0	0	0	0	0	0	0	0	0	0	0	0	0	0	0	0
K00140_methylmalonate-semialdehyde_dehydrogenase	8.51e-06	3.46e-05	2.63e-05	9.05e-06	2.74e-05	2.86e-06	1.69e-05	9.92e-06	1.27e-05	1.45e-05	2.78e-05	2.95e-05	2.19e-06	3.62e-05	2.01e-05	5.47e-05	5.52e-05	1.17e-05	4.59e-05	2.53e-05	1.41e-05	5.95e-05	8.51e-06	4.87e-06	1.02e-05	3.36e-05	9.74e-06	4.14e-05	9.86e-06	5.94e-06	1.93e-05	1.83e-05	4.34e-05	1.8e-05	4.77e-05	3.23e-05	7.37e-05	5.65e-05	4.82e-05	2.51e-05	7.84e-05	5.71e-05	4.17e-05	2.7e-05	1.34e-05	1.72e-05	1.88e-05	7.09e-05
K00141_benzaldehyde_dehydrogenase_(NAD)	0	0	0	4.68e-06	0	0	0	0	0	0	0	0	0	0	0	0	0	0	0	0	0	0	0	0	2.66e-06	0	0	0	0	0	5.77e-07	1.56e-06	0	0	6.97e-07	0	0	0	0	0	8.21e-06	0	0	0	0	0	0	4.37e-06
K00142_aminoadipate-semialdehyde_dehydrogenase	0	0	0	0	0	0	0	0	0	0	0	0	0	0	0	0	0	0	0	0	0	0	0	0	0	0	0	0	0	0	0	0	0	0	0	0	0	0	0	0	0	0	0	0	0	0	4.65e-07	0
K00145_N-acetyl-gamma-glutamyl-phosphate_reductase	0.000618356	0.000900769	0.000616731	0.000385697	0.000496834	0.000491383	0.000700433	0.000928497	0.000767906	0.000744696	0.000581752	0.000891941	0.00111737	0.000226288	0.000982931	0.000811635	0.000809564	0.00060689	0.000710457	0.000711659	0.000780488	0.000451465	0.000542349	0.000719888	0.000769361	0.000779582	0.000980257	0.000791807	0.000935771	0.000645825	0.000448516	0.00106	0.00107591	0.000925817	0.000710367	0.000443055	0.000739744	0.000718186	0.00118447	0.00053291	0.000890604	0.000582118	0.000698789	0.00105243	0.000779712	0.00101184	0.000596834	0.0006264
K00146_phenylacetaldehyde_dehydrogenase	0	0	2.03e-06	0	0	0	0	0	0	0	0	0	0	0	0	0	0	0	0	0	0	0	0	0	0	4.6e-07	1.86e-07	0	1.65e-07	5.89e-07	5.06e-06	8.58e-07	0	0	0	1.08e-06	0	0	0	1.52e-05	0	4.43e-06	0	0	0	0	1.1e-06	1.4e-06
K00147_glutamate-5-semialdehyde_dehydrogenase	0.000911934	0.00103459	0.000880925	0.00110864	0.000968381	0.000946736	0.000805871	0.000942874	0.000873137	0.000953713	0.000955848	0.000907054	0.000761045	0.00087034	0.000929044	0.000595056	0.000700484	0.000931225	0.000906581	0.000797057	0.000888034	0.000802407	0.000895223	0.000883133	0.00101739	0.000932961	0.00078262	0.000912666	0.000900634	0.000731451	0.000920161	0.000912411	0.00101331	0.000844673	0.000821277	0.000893329	0.00088787	0.000849802	0.000809673	0.000871423	0.000964385	0.00088891	0.000862029	0.000881056	0.000961514	0.000864675	0.000915946	0.000918352
K00148_glutathione-independent_formaldehyde_dehydrogenase	5.36e-06	0	3.74e-06	1.12e-05	5.65e-06	0	0	0	0	0	0	0	0	0	0	0	1.63e-05	0	0	1.05e-05	0	1.25e-05	0	0	0	0	0	1.36e-05	1.04e-06	0	6.91e-07	9.38e-07	0	0	0	2.23e-06	0	5.11e-06	1.1e-05	0	0	0	0	0	0	0	0	0
K00149_4-trimethylammoniobutyraldehyde_dehydrogenase	1.37e-06	0	0	0	0	0	0	0	0	0	0	0	0	0	0	0	0	0	0	0	0	0	0	0	0	0	3.56e-07	0	0	1.12e-06	0	6.34e-08	0	0	0	0	0	0	0	0	1.68e-06	0	0	0	2.18e-06	0	0	0
K00150_glyceraldehyde-3-phosphate_dehydrogenase_(NAD(P))	1.88e-05	7.5e-06	1.3e-05	2.72e-05	6.73e-06	6.54e-06	8.8e-07	3.42e-05	1.71e-07	1.07e-05	1.09e-05	3.12e-05	3.22e-06	9.37e-06	1.97e-05	2.5e-05	2.94e-05	1.43e-05	1.09e-05	1.29e-05	1.28e-05	1.49e-05	2.01e-05	1.44e-05	8.2e-06	0.000109547	0	1.54e-05	7.31e-06	1.77e-05	5.93e-06	1.05e-05	8.02e-06	8.31e-06	2.69e-05	5.5e-06	9.93e-06	5.97e-06	0	3.7e-05	2.34e-05	6.53e-06	1.76e-05	2.71e-05	3.09e-05	3.7e-06	9.35e-06	1.84e-05
K00151_5-carboxymethyl-2-hydroxymuconic-semialdehyde_dehydrogenase	0	0	0	0	0	0	0	0	0	0	0	8.73e-06	0	0	0	8.12e-06	0	0	0	0	0	9.97e-06	0	0	0	0	0	0	0	0	3.44e-06	2.3e-06	0	0	0	0	0	0	0	1.03e-05	0	4.53e-06	0	0	0	0	0	0
K00153_NAD/factor-dependent_formaldehyde_dehydrogenase	0	0	0	0	0	0	0	0	0	0	0	0	0	0	0	0	9.18e-06	0	0	0	6.4e-06	0	0	0	0	0	0	1.44e-05	3.44e-06	0	1.55e-06	1.56e-06	0	1.76e-06	2.8e-06	5e-06	0	0	1.84e-05	0	1.1e-05	0	0	0	0	0	1.38e-06	1.16e-05
K00154_coniferyl-aldehyde_dehydrogenase	0	8.83e-07	0	0	0	0	4.45e-06	0	0	0	0	0	0	0	0	0	0	0	0	0	0	0	0	0	0	0	0	0	0	0	0	4.33e-06	0	0	3.32e-06	0	0	0	0	0	0	0	0	0	0	0	0	0
K00155	3.71e-08	4.3e-07	3.29e-06	5.93e-08	1.41e-07	4.74e-08	0	0	3.71e-08	6.24e-08	5.52e-06	7.73e-08	4.35e-08	0	9.66e-08	0	3.08e-08	3.95e-06	0	0	4.83e-08	1.36e-07	0	0	1.63e-07	0	5.26e-08	0	8.88e-08	0	1.79e-06	8.48e-07	1.99e-06	6.33e-08	7.12e-07	6.43e-08	0	2.82e-08	3.47e-08	3.53e-06	0	3.84e-08	0	6.62e-08	2.31e-06	2.71e-06	7.22e-08	5.43e-08
K00156_pyruvate_dehydrogenase_(cytochrome)	7.25e-06	7.32e-07	9.35e-06	3.92e-06	0	0	0	0	8.11e-06	0	6.05e-06	0	0	5.09e-06	0	0	0	1.36e-05	0	1.1e-05	8e-06	0	0	8.33e-06	2.06e-06	0	3.62e-06	0	2.77e-06	5.2e-06	3.36e-06	1.58e-06	0	0	2.48e-06	1.57e-06	0	4.57e-06	0	8.7e-06	6.88e-06	0	0	1.18e-05	1.93e-06	2.15e-06	0	7.07e-06
K00157_aldehyde_oxidase	0	0	0	0	0	0	0	0	0	0	0	0	0	0	2.5e-06	0	0	0	0	0	0	0	0	0	0	0	0	0	0	0	0	0	0	0	0	0	1.26e-06	0	0	0	0	0	0	0	0	0	0	0
K00158_pyruvate_oxidase	0	2.12e-06	8.56e-07	0	0	0	0	0	0	0	0	0	0	0	0	0	0	0	0	0	3.84e-06	0	0	0	0	0	1.19e-06	0	0	5.1e-06	4.85e-07	6.28e-07	0	0	0	0	0	0	0	0	6.63e-06	0	0	0	0	2.05e-06	8.46e-07	0
K00161_pyruvate_dehydrogenase_E1_component_subunit_alpha	1.31e-05	1.79e-05	3.8e-05	6.45e-06	4.84e-05	2.16e-05	0	3.05e-05	1.3e-05	1.11e-05	5.34e-05	1.95e-05	1.34e-05	2.74e-05	1.02e-05	5.93e-05	3.64e-05	0	1.98e-05	1.85e-05	6.88e-06	1.5e-05	1.97e-05	1.42e-05	1.9e-05	2.3e-05	1.93e-05	0.000126495	2.9e-05	7.34e-05	1.24e-05	2.8e-05	1.07e-05	8.02e-06	1.59e-05	1.76e-05	3.95e-05	4.28e-05	5.64e-06	4.56e-05	2.45e-05	3.4e-05	4.41e-05	1.4e-05	1.04e-05	8.31e-05	1.48e-05	6.57e-06
K00162_pyruvate_dehydrogenase_E1_component_subunit_beta	2.51e-05	6.86e-06	2.46e-05	2.69e-05	7.26e-05	1.26e-05	0	1.94e-05	0	5.31e-06	0	0	1.6e-05	9.27e-06	2.05e-05	0	2.98e-05	4.24e-06	1.02e-05	3.59e-05	0	1.3e-05	3.67e-05	7.52e-06	2.93e-06	2.34e-05	1.24e-05	4.54e-05	3.38e-05	5.3e-05	1.12e-05	1.56e-05	8.21e-06	4.06e-06	9.27e-06	1.26e-05	2.95e-05	5.56e-05	1.34e-05	4.91e-05	1.66e-05	1.33e-05	2.7e-05	0	1e-05	2.16e-05	1.05e-05	3.01e-05
K00163_pyruvate_dehydrogenase_E1_component	7.23e-06	4.76e-06	1.33e-05	5.49e-06	2.05e-05	1.59e-06	4.75e-06	1.8e-06	0	4.35e-06	3.96e-06	0	2.44e-06	3.83e-06	3.8e-06	4.34e-06	1.83e-05	2.43e-05	2.01e-05	1.19e-05	5.2e-06	2.5e-05	0	1.13e-05	2.89e-06	3.78e-06	3.96e-06	1.11e-05	1.14e-05	1.02e-05	1.67e-05	1.7e-05	1.03e-06	0	4.84e-06	7.98e-06	3.73e-06	1.38e-05	1.73e-05	1.73e-05	9e-06	2.74e-05	1.04e-05	1.79e-05	1.26e-06	1.51e-06	9.49e-06	1.67e-05
K00164_2-oxoglutarate_dehydrogenase_E1_component	2.27e-06	2.57e-06	4.81e-06	6.64e-06	1.99e-05	7.64e-07	9.13e-06	1.59e-06	0	6.75e-06	9.27e-06	6.87e-06	1.17e-06	6.12e-06	6.71e-06	1.77e-05	7.61e-06	2.49e-05	5.52e-06	4.97e-06	1.24e-05	9.82e-06	4.35e-06	6.51e-06	3.73e-06	5.15e-06	6.64e-06	2.65e-05	8.52e-06	6.37e-06	1.76e-05	1.36e-05	2.66e-06	7.27e-07	4.24e-06	4.96e-06	1.23e-05	5.96e-06	1.32e-05	2.02e-05	4.21e-06	1.48e-05	0	1.87e-05	1.1e-06	2.16e-06	3.84e-06	1.35e-05
K00166_2-oxoisovalerate_dehydrogenase_E1_component,_alpha_subunit	0	0	0	0	5.61e-06	0	0	0	0	0	0	0	0	0	0	0	4.02e-06	4.51e-06	0	0	0	0	0	0	0	0	0	0	1.01e-06	0	6.67e-07	4.61e-07	0	0	0	0	0	4.73e-06	0	0	0	0	9.02e-06	5.4e-06	0	0	0	5.15e-06
K00167_2-oxoisovalerate_dehydrogenase_E1_component,_beta_subunit	0	0	0	0	0	0	0	0	0	0	0	0	0	8.81e-06	0	1.21e-05	4.69e-06	0	0	0	0	0	0	0	0	0	0	0	1.17e-06	0	1.62e-06	5.42e-07	0	0	1.03e-06	5.3e-06	0	6.02e-06	0	0	0	0	0	0	0	0	0	0
K00169_pyruvate_ferredoxin_oxidoreductase,_alpha_subunit	0.000122958	9.56e-05	0.000142145	0.000177846	0.000127109	0.000114784	7.53e-05	6.93e-05	0.000109009	0.000125717	0.000108837	0.00017875	9.64e-05	5.88e-05	0.000146867	0.000371822	9.84e-05	0.000107846	0.000179477	7.85e-05	6.57e-05	0.000206956	0.000148987	0.000144315	0.000156796	0.000121777	6.67e-05	0.000148688	6.4e-05	8.98e-05	7.37e-05	9.57e-05	0.000188858	0.00017399	0.000179535	0.000188779	0.00018627	0.000122699	0.000130946	8.12e-05	0.000360318	0.000150057	0.000168708	0.00013839	0.000106478	8.6e-05	0.000181999	0.00010595
K00170_pyruvate_ferredoxin_oxidoreductase,_beta_subunit	0.000151255	0.000119032	0.000243988	0.000248655	0.000126542	0.000171306	0.00015267	0.000123628	9.57e-05	0.00024125	0.000168561	0.000219261	9.95e-05	0.000224492	0.000262221	0.000546058	0.000153601	0.000197357	0.000295505	0.000144378	0.000127953	0.000496451	0.000201176	0.00019718	0.000247186	0.000106905	0.000104096	0.000117972	7.36e-05	0.000223481	0.00012126	0.000134889	0.000386146	0.000285746	0.000349865	0.000167618	0.000201143	0.000309326	0.000321631	0.000187467	0.000615447	0.00022315	0.000127201	0.000336713	0.000153664	0.000132181	0.000307156	0.000131532
K00171_pyruvate_ferredoxin_oxidoreductase,_delta_subunit	5.35e-05	2.01e-05	4.61e-05	7.13e-05	2.32e-05	2.86e-05	6.46e-05	1.28e-05	0	3.69e-05	0	2.15e-05	1.9e-05	3.07e-05	6.72e-05	7.96e-05	6.59e-05	4.86e-05	0.000191563	0	0.000116012	8.78e-05	5.9e-05	7.37e-05	8.68e-05	6.81e-05	2.11e-05	0.000156815	1.49e-05	4.54e-05	1.97e-05	4.28e-05	2.73e-05	6.86e-05	4.93e-05	5.86e-05	2.98e-05	9.92e-05	0.000133888	5.04e-05	0.000240231	4.41e-05	0.000103771	6.85e-05	6.47e-05	1.23e-05	0.000101318	4.22e-05
K00172_pyruvate_ferredoxin_oxidoreductase,_gamma_subunit	5.31e-05	5.28e-05	0.000112295	0.000113114	6.79e-05	7.28e-05	5.11e-05	8.01e-05	8.17e-05	0.000192838	3.86e-05	0.000150418	3.07e-05	0.000103408	5.44e-05	0.000320282	0.000173734	0.000109882	0.000168116	6.19e-05	3.75e-05	0.000317153	0.00018293	9.73e-05	0.000162235	3.74e-05	6.13e-05	0.000111552	3.87e-05	0.000183677	7.95e-05	7.13e-05	0.000303764	0.000136212	0.000214829	7.55e-05	2.36e-05	9.55e-05	0.000245005	0.000193106	0.000322387	0.00010671	9.06e-05	0.000161321	4.5e-05	0.000123351	0.000176292	7.83e-05
K00174_2-oxoglutarate_ferredoxin_oxidoreductase_subunit_alpha	0.0011513	0.0003668	0.00110634	0.00167776	0.00128083	0.00164578	0.00126646	0.00105363	0.00137891	0.00107042	0.00143751	0.000871429	0.00134157	0.00209691	0.00102068	0.00133322	0.00112237	0.000903219	0.00119878	0.000890165	0.00106744	0.00116131	0.00136481	0.00106357	0.000808759	0.00113096	0.00145723	0.00116296	0.00133546	0.000725556	0.0018722	0.000860271	0.0010376	0.000913384	0.000969988	0.00207094	0.00153572	0.00126	0.00111418	0.00131461	0.000871972	0.00140318	0.000663063	0.000839795	0.00129988	0.000980433	0.00128876	0.00113472
K00175_2-oxoglutarate_ferredoxin_oxidoreductase_subunit_beta	0.00200975	0.000765403	0.0020521	0.00303394	0.00271597	0.00323054	0.00291291	0.00215454	0.00337578	0.00223364	0.00252814	0.00166843	0.00223917	0.00453328	0.0018909	0.00226733	0.0020558	0.00208277	0.00193636	0.00197173	0.001971	0.00295906	0.0027329	0.00241473	0.00177074	0.00225996	0.00262817	0.00216069	0.00246192	0.00130029	0.00424269	0.00159718	0.00209085	0.00187716	0.00219583	0.00407778	0.00305735	0.00232821	0.00202945	0.00274607	0.00184975	0.00314026	0.00165564	0.00163676	0.00293642	0.00172131	0.00273356	0.00183779
K00176_2-oxoglutarate_ferredoxin_oxidoreductase_subunit_delta	0.000587431	0.000162296	0.000461197	0.000508919	0.000397562	0.000602696	0.000539754	0.00015447	0.000506784	0.000631105	0.000549413	0.000281049	0.000364301	0.000378512	0.000708116	0.00041496	0.00058383	0.000182506	0.000539439	0.000308479	0.000379969	0.00092265	0.000392867	0.000578765	0.000419184	0.000532245	0.000551972	0.00054319	0.000417146	0.000264881	0.000504412	0.000310467	0.000586615	0.000309437	0.000302303	0.00124429	0.000736093	0.000212819	0.000497693	0.000420516	0.000425376	0.000663259	0.000156007	0.000300206	0.000771522	0.000426569	0.000313341	0.000252532
K00177_2-oxoglutarate_ferredoxin_oxidoreductase_subunit_gamma	0.000601656	0.00026922	0.000769107	0.000803473	0.000532048	0.00103264	0.000447492	0.000553419	0.000790649	0.000748501	0.000504659	0.000553617	0.000832028	0.000701819	0.000741703	0.000370705	0.000748039	0.000772504	0.000573381	0.000575436	0.000653932	0.00108912	0.00099095	0.000675696	0.000603327	0.000610243	0.000802392	0.000690174	0.000639958	0.000332416	0.000752511	0.000480124	0.000652953	0.000581915	0.000583503	0.00115002	0.000912138	0.000551436	0.000800249	0.000711119	0.000483958	0.00102343	0.000630999	0.000565439	0.000653398	0.000451848	0.000698552	0.00068881
K00179_indolepyruvate_ferredoxin_oxidoreductase,_alpha_subunit	0.000541294	0.000175259	0.000660488	0.000542189	0.000755651	0.000487725	0.00101071	0.000287983	0.000547263	0.000332896	0.000588989	0.000327519	0.000248257	0.00105769	0.000465243	0.000499645	0.000258626	0.000534778	0.000536988	0.000498046	0.000365586	0.000603364	0.000617819	0.000537973	0.000350681	0.000183486	0.000173211	0.000234264	0.00029193	0.000548824	0.000852625	0.000270112	0.00034364	0.000433254	0.000451003	0.000626649	0.000487542	0.000551114	0.000210985	0.00035008	0.000639534	0.000786384	0.000249392	0.000493588	0.000487413	0.000356393	0.000611917	0.000393684
K00180_indolepyruvate_ferredoxin_oxidoreductase,_beta_subunit	0.00026855	0.000102111	0.000240482	0.000155056	0.000204566	0.000139187	0.000134633	0.000104729	4.46e-05	7.65e-05	9.17e-05	8.91e-05	6.33e-05	0.000301402	0.000228917	0.00014524	2.59e-05	0.000123613	0.000149512	0.000155653	9.71e-05	0.00011897	0.000225018	0.00014049	7.4e-05	7.7e-05	5.15e-05	8.18e-05	4.98e-05	0.000173637	0.000148107	8.99e-05	0.00011433	0.000116811	0.000131148	0.000114009	0.000168052	0.000138312	6.99e-05	7.91e-05	8.34e-05	0.000185348	7.88e-05	8.33e-05	0.000123706	0.000116164	0.000117868	0.000165768
K00182_wingless-type_MMTV_integration_site_family,_member_2	0	0	0	0	0	0	0	0	0	4.26e-06	0	0	0	0	0	0	0	0	0	0	0	5.88e-06	0	0	0	0	0	0	0	0	0	0	0	0	0	0	0	0	0	0	0	0	0	0	0	0	2.32e-06	0
K00183_molybdopterin_oxidoreductase,_molybdopterin_binding_subunit	0	1.5e-06	0	0	0	0	0	0	0	0	0	0	0	0	0	0	0	2.3e-06	0	0	0	0	0	0	0	0	0	0	0	0	5.99e-07	1.01e-06	0	0	3.96e-07	0	0	0	0	0	0	0	0	0	0	0	0	0
K00184_molybdopterin_oxidoreductase,_iron-sulfur_binding_subunit	1.04e-05	3.88e-05	0	0	0	0	0	0	0	3.57e-05	1.7e-05	1.03e-05	1.07e-05	0	0	0	0	0	0	8.22e-06	0	0	0	0	0	2.14e-05	1.03e-05	2.53e-05	8.9e-06	0	3.01e-06	4.28e-05	1.77e-05	6.8e-06	6.74e-06	8.85e-06	0	1.87e-05	2.16e-05	1.22e-05	0	0	1.46e-05	0	9.14e-06	6.05e-06	1.04e-06	3.08e-05
K00185_molybdopterin_oxidoreductase,_membrane_subunit	0	3.11e-06	3.83e-06	9.38e-06	0	0	0	0	0	4.76e-06	0	0	2.86e-06	0	0	0	7.02e-06	0	0	0	0	0	0	5.7e-06	0	0	0	0	3.33e-06	0	0	2.95e-06	2.37e-06	1.43e-06	1.59e-06	0	3.45e-06	4.86e-06	0	1.3e-05	0	0	0	0	2.94e-06	0	0	4.31e-06
K00186_2-oxoisovalerate_ferredoxin_oxidoreductase,_alpha_subunit	4.64e-06	0	1.61e-05	4.95e-06	0	0	0	0	0	0	0	0	0	0	0	0	0	0	3.88e-06	0	1.01e-05	0	0	0	0	0	0	0	2.71e-06	1.31e-05	1.83e-06	0	0	3.03e-06	0	1.69e-06	3.67e-06	0	0	5.48e-06	1.73e-05	0	0	4.95e-06	0	0	3.26e-06	0
K00187_2-oxoisovalerate_ferredoxin_oxidoreductase,_beta_subunit	5.53e-07	2.36e-07	1.03e-05	4.75e-06	5.95e-07	3.72e-06	0	5.75e-07	2.05e-06	3.44e-07	2.44e-06	9.29e-07	0	7.13e-06	5.36e-07	1.64e-06	1.94e-06	9.89e-07	7.45e-06	1.47e-06	2.5e-06	1.06e-06	5.05e-06	0	3.86e-07	1.8e-07	6.79e-07	0	1.96e-06	1.6e-06	2.35e-06	7.36e-07	2.69e-07	1.78e-06	1.9e-07	1.24e-06	9.42e-06	0	7.65e-06	0	8.33e-06	1.22e-05	1.38e-06	4.76e-06	0	9.27e-07	3.06e-06	9.88e-07
K00194_carbon-monoxide_dehydrogenase_delta_subunit	0	0	0	0	0	0	0	0	0	0	0	0	0	0	0	0	5.25e-06	0	0	1.36e-05	0	0	6.86e-06	0	0	3.61e-06	0	0	0	0	0	2.41e-06	0	0	1.08e-06	0	0	0	0	0	0	0	0	0	0	0	3.18e-06	0
K00197_carbon-monoxide_dehydrogenase_gamma_subunit	4.77e-06	1.9e-06	2.64e-05	5.08e-06	1.02e-05	9.62e-06	4.78e-06	1.11e-05	4.77e-06	8.16e-06	0	1.9e-05	0	2.04e-05	7.52e-06	0	7.35e-06	0	1.59e-05	9.51e-06	5.17e-06	5.64e-06	4.81e-06	1.09e-05	5.72e-06	1.01e-05	3.12e-06	0	3.71e-06	6.73e-06	1e-05	4.63e-06	8.13e-06	1.56e-06	3.78e-06	1.82e-05	1.13e-05	4.54e-06	4.96e-06	5.63e-06	8.77e-06	0	2.01e-05	2.03e-05	7.55e-06	1.66e-05	2.12e-05	9.35e-06
K00198_carbon-monoxide_dehydrogenase_catalytic_subunit	1.33e-05	2.81e-05	9.94e-05	0.000122674	4.16e-05	3.74e-05	1.8e-05	3.81e-05	6.71e-06	4.95e-05	3.08e-05	6.47e-05	1.26e-05	5.32e-05	0.000105593	9.11e-05	8.71e-05	7.33e-05	0.000156102	5.24e-05	4.06e-05	0.00012443	3.8e-05	3.27e-05	5.01e-05	8.56e-05	1.92e-05	8.21e-05	1.83e-05	3.58e-05	2.84e-05	0.00011914	4.77e-05	3.11e-05	2.9e-05	4.58e-05	8.14e-05	0.000103791	7.44e-05	2.65e-05	8.68e-05	7.04e-05	7.86e-05	0.000149784	5.35e-05	4.73e-05	4.89e-05	2.72e-05
K00200_formylmethanofuran_dehydrogenase_subunit_A	0	0	0	0	0	0	0	0	0	0	0	0	0	0	0	0	0	0	0	0	0	0	0	0	0	0	0	0	0	0	0	3.29e-07	0	0	0	0	0	0	0	0	0	4.04e-06	0	0	0	0	1.82e-06	0
K00207_dihydropyrimidine_dehydrogenase_(NADP+)	0	0	0	0	0	0	0	0	0	0	7.03e-06	0	0	0	0	0	0	0	4.09e-06	0	0	0	0	0	0	0	0	0	9.54e-07	0	0	1.74e-06	0	0	0	0	0	4e-06	0	0	0	0	0	0	0	0	0	4.83e-06
K00208_enoyl-[acyl-carrier_protein]_reductase_I	0.000232452	9.13e-05	0.000178962	0.000571692	0.000138676	0.000285691	0.00019598	0.000275568	0.000187597	0.000135165	9.83e-05	0.000172265	0.000556056	0.000181909	0.000438804	0.000194535	0.000318931	9.64e-05	0.000350834	0.000247309	0.000220545	0.000125533	0.000266232	0.000405074	0.000254408	0.000346127	0.00052185	0.000255483	0.0003632	0.000116956	0.000172281	0.000274444	0.000259689	0.000284088	0.000190574	0.000255696	0.000374662	0.000128542	0.000468981	0.000132715	0.000224087	0.000179542	6.51e-05	0.00029679	0.000249822	0.000213338	0.000267675	5.96e-05
K00210_prephenate_dehydrogenase	0.000127998	2.92e-05	8.21e-05	0.00020789	0.000201706	0.000141841	0.000107238	7.78e-05	4.98e-05	4.98e-05	6.81e-05	1.66e-05	0.000106832	9.46e-05	0.000133157	7.7e-05	0.000108969	7.22e-05	8.8e-05	9.12e-05	8.89e-05	5.46e-05	0.000139486	2.86e-05	6.13e-05	4.97e-05	0.000106791	2.02e-05	0.000113051	2.35e-05	0.000125075	7.01e-05	7.44e-05	5.43e-05	7.11e-05	0.000120726	0.000134199	3.96e-05	0.000121144	0.00018642	7.76e-05	7.59e-05	2.34e-05	3.55e-05	0.000100885	8.2e-05	0.000109728	3.28e-05
K00212_trans-1,2-dihydrobenzene-1,2-diol_dehydrogenase	0	0	0	0	0	0	0	1.03e-05	0	0	0	0	0	0	0	0	0	0	0	0	0	0	0	0	0	0	0	0	0	0	0	0	0	0	0	0	0	0	0	0	0	0	0	0	0	0	0	0
K00213_7-dehydrocholesterol_reductase	0	0	0	0	0	0	0	3.51e-06	0	0	0	0	0	0	0	0	0	0	0	0	0	0	0	0	0	0	0	0	0	0	0	0	0	0	0	0	3.46e-06	0	0	0	0	0	0	0	0	0	0	0
K00215_dihydrodipicolinate_reductase	0.000386019	0.000871488	0.000416413	0.000538921	0.000541683	0.000596551	0.000339969	0.000627673	0.000554845	0.000600526	0.000518088	0.00064733	0.00083509	0.000340586	0.000725239	0.000285784	0.000604146	0.000687574	0.000397832	0.000576301	0.000470066	0.000383872	0.000495237	0.000503412	0.000583867	0.000793619	0.000814553	0.000618789	0.000768364	0.000747436	0.000348174	0.000729548	0.000589753	0.000757927	0.000567735	0.00042332	0.000373141	0.000454354	0.00064172	0.000348277	0.000529947	0.000452565	0.000653567	0.000518848	0.000623763	0.000843052	0.000436308	0.000426881
K00218_protochlorophyllide_reductase	0	0	0	0	0	0	0	0	0	0	0	0	0	0	0	0	0	0	0	0	0	0	0	0	0	0	0	0	0	0	0	0	2.84e-06	0	8.49e-07	2.28e-06	0	0	0	0	0	0	0	0	0	0	0	0
K00219_2,4-dienoyl-CoA_reductase_(NADPH2)	0	6.74e-06	0	0	0	0	3.17e-06	0	3.08e-06	2.64e-06	0	3.17e-06	1.58e-06	0	0	0	0	5.76e-06	1.31e-05	3.17e-06	0	0	0	0	0	3.27e-06	0	0	1.22e-06	0	4.96e-06	2.03e-05	2.63e-06	2.01e-06	5.82e-06	1.35e-06	0	5.87e-06	9.63e-06	7.38e-06	0	0	0	0	6.3e-06	5.85e-06	7.42e-07	0
K00220_cyclohexadienyl_dehydrogenase	0	0	0	0	0	0	0	0	0	0	0	0	0	0	0	0	0	0	4.73e-06	0	0	0	0	0	1e-06	2.02e-07	0	0	0	0	3.14e-06	1.01e-06	0	0	0	6.07e-07	0	0	0	0	0	0	0	0	0	0	0	0
K00222_delta14-sterol_reductase	0	0	0	0	0	0	0	0	0	0	0	0	0	0	0	0	0	0	0	0	0	0	0	0	0	0	0	0	0	0	0	0	0	0	0	0	0	0	0	0	9.47e-06	0	0	0	0	0	1.12e-06	0
K00224	0	0	0	0	5.05e-06	3.15e-06	0	0	0	4.07e-06	0	0	9.67e-06	0	0	0	5.74e-06	0	0	0	5.1e-06	0	4.82e-06	0	0	0	0	0	0	0	1.26e-06	4.15e-07	2e-06	0	1.04e-05	0	0	0	0	0	0	0	6.68e-06	0	2.51e-06	0	1.1e-06	4.69e-06
K00225_L-galactono-1,4-lactone_dehydorogenase	0	0	0	0	0	0	0	0	0	0	0	0	0	5.09e-06	0	0	0	0	0	0	0	0	3.62e-06	0	0	0	0	0	0	0	4.71e-07	0	0	0	0	0	0	0	0	0	0	0	0	0	0	0	0	0
K00226_dihydroorotate_oxidase	0.000946081	0.00161361	0.000844724	0.000813058	0.000908272	0.00121451	0.00076447	0.00167031	0.0011671	0.00132914	0.000831859	0.00157782	0.00143121	0.000514523	0.00101457	0.000658095	0.000690692	0.000994405	0.000713376	0.0010894	0.00105027	0.000638328	0.000747754	0.000732819	0.00141025	0.0014537	0.00138645	0.00112634	0.00138181	0.00117515	0.000683986	0.0015664	0.0012126	0.00151139	0.00117767	0.000720601	0.000826325	0.000814172	0.000963257	0.00085363	0.000695313	0.000836949	0.00125365	0.00106301	0.00126407	0.00164912	0.000879553	0.000944058
K00228_coproporphyrinogen_III_oxidase	0	0	1.01e-05	0	0	2.43e-06	6.23e-06	0	0	0	1.03e-05	0	0	0	0	0	0	0	1.16e-05	7.25e-06	0	0	0	8.09e-06	0	3.29e-06	0	0	1.34e-06	0	5.54e-06	1.52e-05	0	3.98e-06	4.37e-06	0	0	5.97e-06	0	0	9.03e-06	6.69e-06	8.69e-06	0	0	0	1.75e-06	7.38e-06
K00230_protoporphyrinogen_oxidase	0	0	0	0	1.1e-05	0	0	0	0	0	0	0	0	0	1.96e-05	0	0	0	9.85e-06	2.22e-05	0	0	0	0	0	0	0	0	0	0	7.78e-06	1.03e-06	0	0	0	5.02e-06	0	1.19e-05	0	0	0	0	0	0	0	0	0	0
K00231_protoporphyrinogen_oxidase	0	0	0	4.23e-06	4.28e-06	0	0	0	0	3.4e-06	0	0	0	0	0	0	0	1.1e-05	0	0	0	4.69e-06	0	0	0	0	0	0	0	0	2.61e-06	4.17e-07	0	0	0	0	0	0	0	4.69e-06	0	8.91e-06	6.51e-06	4.24e-06	0	0	1.05e-06	4.58e-06
K00232_acyl-CoA_oxidase	0	0	0	3.25e-06	0	0	0	2.4e-06	0	0	0	3.26e-06	0	0	4.96e-06	5.94e-06	2.46e-06	0	0	0	0	0	3.35e-06	7.25e-06	0	0	0	0	1.2e-06	4.47e-06	4.3e-07	2.84e-07	0	0	5.08e-07	0	0	0	0	3.65e-06	0	0	0	0	0	0	7.5e-07	3.15e-06
K00234_succinate_dehydrogenase_(ubiquinone)_flavoprotein_subunit	1.52e-06	6.9e-07	1.08e-06	0	5.25e-06	0	0	0	0	0	0	0	0	1.27e-06	0	0	6.7e-06	0	5.61e-06	6.82e-06	5.99e-07	4.97e-06	0	0	1.95e-06	7.11e-07	0	0	8.85e-07	1.89e-06	1.68e-07	1.39e-06	3.32e-07	0	6.45e-07	1.58e-06	6.56e-07	3.04e-06	5.88e-07	0	5.24e-06	6.15e-06	4.15e-06	0	0	7.67e-07	4.67e-06	3.02e-06
K00235_succinate_dehydrogenase_(ubiquinone)_iron-sulfur_protein	0	0	2.39e-06	0	3.66e-06	2.34e-06	0	0	0	0	0	0	0	0	5.33e-06	0	4.21e-06	0	8.12e-07	0	0	0	3.49e-06	4.85e-06	0	0	0	0	6.44e-07	0	9.7e-07	2.32e-06	2.16e-06	0	0	2.05e-06	0	0	0	1.01e-05	0	0	0	0	0	0	8.73e-07	0
K00236_succinate_dehydrogenase_(ubiquinone)_cytochrome_b_subunit	0	0	0	0	0	0	0	0	0	0	0	0	0	0	0	0	0	0	0	0	0	0	1.33e-05	0	0	0	0	0	0	0	0	0	0	0	0	0	0	0	0	0	0	0	0	0	0	0	9.58e-06	0
K00239_succinate_dehydrogenase_flavoprotein_subunit	0.00284412	0.00137829	0.0025119	0.0027513	0.00273547	0.00298926	0.00471872	0.00232884	0.00287641	0.00215276	0.00334314	0.001912	0.00337286	0.004659	0.00280897	0.00338914	0.00357438	0.00236486	0.00303055	0.00278831	0.00256131	0.002658	0.00315057	0.00300171	0.00191462	0.00214305	0.00306928	0.00188423	0.00302321	0.00191518	0.00387638	0.00196162	0.00223281	0.00240609	0.0024181	0.0034805	0.00343609	0.00225389	0.00267083	0.0024698	0.00209606	0.00274179	0.0017365	0.00193279	0.00275161	0.00202118	0.00314102	0.00226549
K00240_succinate_dehydrogenase_iron-sulfur_protein	0.00243567	0.00113076	0.00162627	0.00243624	0.00193398	0.00231846	0.0035612	0.00172317	0.00177471	0.00150215	0.00248182	0.00151302	0.00296142	0.00396115	0.00212532	0.00210646	0.00291716	0.00162412	0.00244154	0.0020005	0.00220062	0.00178444	0.00272569	0.00229795	0.00134429	0.00201184	0.00267501	0.00163716	0.00247801	0.00134343	0.00270611	0.00159786	0.00208158	0.00179226	0.00173232	0.00279377	0.00244806	0.00185726	0.00222986	0.00228912	0.00153937	0.00193931	0.00130963	0.00150718	0.00243433	0.00157483	0.00229161	0.00146182
K00241_succinate_dehydrogenase_cytochrome_b-556_subunit	0.000477882	0.00013363	0.000338945	0.000467488	0.000373041	0.000477024	0.000412015	0.000454251	0.00030843	0.00031059	0.000335473	0.000393642	0.000835443	0.000528843	0.000597491	0.000380992	0.000672418	0.000252336	0.000537157	0.000455617	0.000407052	0.00030855	0.000369415	0.000557248	0.000206873	0.000524072	0.000825103	0.00052316	0.000563748	0.000170953	0.000380487	0.000361914	0.000414659	0.000324029	0.000306769	0.000574218	0.00063447	0.000462164	0.000576725	0.000351885	0.000215633	0.000337827	0.000123224	0.000410179	0.000501114	0.000216646	0.000407385	0.000209908
K00242_succinate_dehydrogenase_hydrophobic_membrane_anchor_protein	0	0	9.44e-06	0	0	0	0	0	0	0	0	1.39e-05	0	0	0	0	0	0	0	0	0	0	0	0	0	0	0	0	2.69e-06	0	9.76e-06	1.56e-06	5.98e-06	0	0	0	0	1.34e-05	0	0	0	0	0	0	0	0	0	0
K00243_hypothetical_protein	0.000253784	8.19e-05	0.000154702	0.000194724	0.000128632	0.000195643	0.000226768	0.000246	6.76e-05	0.000141036	0.000161053	0.000261633	0.000482345	0.000149013	0.000414301	0.000165991	0.000386375	0.000129025	0.000287467	0.000268451	0.000203607	0.000124057	0.000158282	0.000232346	0.000202238	0.000266377	0.000394383	0.000322847	0.000270997	0.000200376	0.000136712	0.000227263	0.000341866	0.000239781	9.06e-05	0.000203631	0.000384674	0.000206189	0.00044559	7.98e-05	0.000208368	0.000192677	4.25e-05	0.000248327	0.000216035	0.00012614	0.000290849	0.000170003
K00244_fumarate_reductase_flavoprotein_subunit	7.8e-05	3.24e-05	4.09e-05	1.52e-05	0.000135916	2.69e-05	4.2e-05	3.36e-05	4.31e-05	3.51e-05	5.26e-06	3.15e-05	5.34e-05	1.39e-05	3.68e-05	7.09e-05	3.16e-05	6.55e-05	3.03e-05	4.5e-05	6.35e-05	5.73e-05	4.04e-05	2.73e-05	5.98e-05	6.7e-05	1.69e-05	5.5e-05	1.1e-05	9.17e-05	5.42e-05	2.94e-05	5.06e-05	2.07e-05	0.000110063	4.43e-05	9.28e-05	3.58e-05	4.39e-05	4.66e-05	0.000160538	3.16e-05	2.89e-05	7.92e-05	2.71e-05	1.54e-05	5.35e-05	5.91e-05
K00245_fumarate_reductase_iron-sulfur_protein	4.34e-05	1.71e-06	5.31e-05	0	0.000142367	5.88e-06	8.51e-06	2.7e-05	3.49e-05	6.76e-05	0	3.51e-05	4.53e-05	0	0	1.62e-05	1.35e-05	3.93e-05	2.92e-05	2.59e-05	5.72e-05	2.03e-05	4.41e-05	9.9e-06	1.57e-05	3.66e-05	1.42e-05	4.31e-05	6.71e-06	7.32e-05	2.94e-05	1.31e-05	5.28e-05	8.55e-06	0.000121695	2.2e-05	6.87e-05	8.34e-06	4.57e-05	3.1e-05	0.000211681	4.44e-05	1.23e-05	3.64e-05	4.63e-05	5.14e-06	2.24e-05	5.2e-05
K00246_fumarate_reductase_subunit_C	0	0	3.85e-05	0	8.85e-06	8.39e-06	0	6.51e-06	8.34e-06	7.16e-06	2.57e-05	8.35e-06	1.27e-05	3.42e-05	1.32e-05	0	6.45e-06	1.45e-05	0	0	1.8e-05	0	4e-05	1.89e-05	0	8.88e-06	5.51e-06	0	3.25e-06	0	2.12e-05	2.86e-06	1.05e-05	0	5.05e-05	0	3.14e-05	0	0	2.91e-05	9.25e-05	5.74e-05	0	0	1.3e-05	9.49e-06	2.71e-05	2.44e-05
K00247_fumarate_reductase_subunit_D	0	3.73e-06	0	0	1.96e-05	0	0	0	0	1.6e-05	0	0	0	0	0	0	0	0	0	0	0	0	0	4.3e-05	0	9.93e-06	0	0	0	5.29e-05	4.8e-06	0	0	0	0	7.96e-06	1.48e-05	0	0	0	0	1.94e-05	0	0	0	0	0	0
K00248_butyryl-CoA_dehydrogenase	0.000244008	0.000228081	0.000404327	0.000365769	0.00027014	0.000319107	0.000238797	0.000148284	0.000188415	0.000341107	0.000456137	0.000301069	0.000313722	0.000258702	0.000293713	0.000641002	0.000320779	0.000170194	0.000467842	0.000229276	0.00022799	0.000309539	0.000221538	0.000383907	0.00037585	0.000233488	0.000201773	0.000349839	0.000151354	0.00031409	0.000190936	0.00035665	0.000407824	0.00037083	0.000388791	0.000293405	0.00049998	0.000667013	0.000803902	0.000411508	0.000770605	0.000372394	0.000313072	0.000718356	0.000332124	0.000129721	0.000423779	0.000284186
K00249_acyl-CoA_dehydrogenase	2.13e-07	2.17e-06	2.91e-06	7.53e-06	5.42e-06	3.16e-06	1.4e-06	5.48e-06	0	1.91e-06	2.47e-06	2.9e-06	1.06e-07	9.02e-06	7.78e-06	2.19e-05	1.31e-05	2.15e-06	2.08e-06	5.29e-06	7.45e-06	9.63e-06	6.31e-06	1.4e-05	4.58e-06	4.16e-06	1.63e-06	3.17e-06	6.96e-06	6.93e-06	4.42e-06	1.09e-05	6.95e-07	2.88e-06	9.1e-06	2.07e-05	8.65e-07	9.59e-06	4.33e-06	1.57e-05	1.1e-05	3.51e-07	9.14e-07	1.02e-05	3.03e-06	4.74e-06	2.22e-06	1.02e-05
K00252_glutaryl-CoA_dehydrogenase	0	3.18e-06	3.62e-06	1.14e-05	0	0	5.34e-06	8.34e-06	0	0	0	0	0	0	3.17e-07	1e-05	8.18e-06	0	0	5.27e-06	0	6.22e-06	3.38e-07	1.23e-05	0	0	5.24e-06	2.61e-05	6.26e-06	0	4.2e-06	5.19e-06	0	0	3.41e-06	6.87e-06	0	0	1.12e-05	6.19e-06	9.8e-06	5.69e-06	0	0	2.83e-06	0	1.33e-06	0
K00253_isovaleryl-CoA_dehydrogenase	0	0	0	5.85e-06	0	0	0	0	0	0	0	5.46e-06	0	0	0	0	4.32e-06	0	4.68e-06	0	0	9.81e-06	0	4.06e-06	0	5.74e-08	0	1.32e-05	1.07e-06	0	3.73e-06	7.43e-06	0	0	1.09e-06	2.33e-06	0	0	0	8.13e-06	0	0	0	0	5.75e-06	0	0	5.42e-06
K00255_long-chain-acyl-CoA_dehydrogenase	0	0	0	0	0	0	0	0	0	0	0	0	0	0	0	0	0	0	0	0	0	3.32e-06	0	0	3.24e-06	0	0	0	0	0	0	3.18e-06	0	0	0	0	0	0	0	0	0	0	0	0	0	0	0	0
K00256_isoquinoline_1-oxidoreductase	0	0	0	0	0	0	0	0	0	0	0	0	0	0	0	0	0	0	0	0	0	0	0	0	0	0	0	0	0	0	0	1.56e-07	0	0	2.12e-06	0	0	0	0	0	0	0	0	0	0	0	0	0
K00257	0.000494749	8.63e-05	0.000242073	0.000487157	0.000630762	0.000585949	0.000623504	0.000358543	0.000770375	0.000212872	0.000577561	0.000175251	0.000528215	0.0013736	0.000373192	0.000208244	0.000440387	0.000197372	0.000361615	0.000341824	0.000329023	0.000252231	0.000483616	0.000484878	0.00017906	0.000316503	0.000455067	0.000292337	0.000581479	0.00021262	0.00111992	0.000341741	0.000342621	0.000234267	0.00040813	0.000696628	0.000502409	0.000528015	0.000419542	0.000856933	0.00023195	0.000588334	9.71e-05	0.0002101	0.000742907	0.000260875	0.000505486	0.000194218
K00259_alanine_dehydrogenase	0.000272756	4.72e-05	2.01e-05	0.000123509	0.000230914	0.000111358	0.000332004	0.000104134	0.000324295	4.96e-05	0.000180792	0.000109813	0.000128551	0.000503582	0.000200869	6.46e-05	0.000129294	4.81e-05	7.76e-05	8.71e-05	0.000195088	7.54e-05	0.00016366	0.000113138	0.000101069	0.000125993	0.000128141	8.45e-05	0.000149918	9.81e-05	0.00049164	9.79e-05	0.000108715	7.76e-05	0.000100981	0.000204734	0.000178731	0.000171693	0.000144772	0.000116718	7.57e-05	0.000204051	9.79e-05	0.000111561	0.000269677	8.44e-05	0.000154794	6.32e-05
K00260_glutamate_dehydrogenase	1.56e-05	3.13e-06	2.89e-05	3.52e-05	2.82e-05	6.6e-06	7.77e-06	1.51e-05	5.18e-06	1.15e-06	1.69e-05	5.14e-06	2.4e-05	1.66e-05	1.44e-05	9.52e-06	4.44e-05	1.82e-05	1.08e-05	1.84e-05	4.96e-05	1.68e-05	2.76e-05	3.04e-06	1.1e-05	1.89e-06	1.97e-05	8.22e-05	1.03e-05	7.44e-06	1.9e-05	2.07e-05	1.87e-06	2.16e-05	7.69e-06	4.42e-06	6.21e-06	4.2e-05	1.36e-05	4.69e-06	2.19e-05	6.73e-05	0	1.43e-06	6.12e-06	6.07e-06	1.3e-05	1.28e-05
K00261_glutamate_dehydrogenase_(NAD(P)+)	3.86e-05	1.74e-05	4.71e-05	4.56e-05	5.26e-05	3.17e-05	2.76e-05	1.27e-05	3.19e-05	3.23e-05	4.63e-05	3.5e-05	1.05e-05	2.38e-05	2.48e-05	1.16e-05	2.51e-05	3.43e-05	3.46e-05	1.8e-05	3.22e-05	3.67e-05	3.64e-05	1.37e-05	2.76e-05	1.41e-05	1.86e-05	7.75e-05	1.73e-05	3.89e-05	4.9e-05	1.53e-05	1.61e-05	5.51e-05	2.56e-05	3.11e-05	4.05e-05	5.26e-05	1.19e-05	4.31e-05	2.91e-05	5.23e-05	2.16e-05	4.63e-05	1.27e-05	2.09e-05	5.29e-05	3.29e-05
K00262_glutamate_dehydrogenase_(NADP+)	0.00415448	0.00255265	0.00432275	0.00464786	0.00471414	0.00438102	0.00527905	0.00337433	0.0045203	0.00355323	0.00573877	0.00359178	0.00333421	0.00613905	0.00417432	0.0042154	0.00387525	0.00399539	0.00413043	0.00433112	0.00387215	0.00430253	0.00477781	0.00426085	0.0034384	0.00318863	0.00334872	0.00381621	0.00362397	0.00395865	0.00552385	0.003217	0.00373048	0.00387446	0.00426015	0.00558009	0.0050305	0.00427965	0.00336549	0.00482021	0.00425798	0.00441339	0.00341907	0.00353253	0.0041709	0.00347879	0.00488775	0.00416452
K00263_leucine_dehydrogenase	0	0	0	0	0	1.96e-06	0	0	0	0	0	0	0	0	0	0	1.51e-06	0	0	0	0	0	0	0	0	0	0	1.41e-05	2.26e-06	0	7.88e-07	5.21e-07	0	0	0	0	0	0	1.23e-05	0	0	0	0	0	0	3.44e-06	1.39e-06	0
K00264_glutamate_synthase_(NADPH/NADH)	3.02e-05	1.34e-05	2.52e-05	3.07e-05	2.47e-05	1.74e-05	1.91e-05	1.62e-05	1.47e-05	1.85e-05	1.85e-05	1.66e-05	1.67e-05	2.15e-05	2.57e-05	1.81e-05	1.54e-05	2.46e-05	2.46e-05	2.88e-05	2.4e-05	1.4e-05	3.22e-05	1.89e-05	1.87e-05	1.9e-05	1.6e-05	1.8e-05	2.29e-05	1.82e-05	1.46e-05	1.94e-05	2.16e-05	1.57e-05	1.95e-05	3.97e-05	2.65e-05	2.01e-05	2.24e-05	2.01e-05	2.06e-05	1.57e-05	1.33e-05	1.94e-05	1.7e-05	2.08e-05	3.42e-05	2.68e-05
K00265_glutamate_synthase_(NADPH/NADH)_large_chain	0.00106903	0.00130753	0.000963622	0.00120483	0.000864963	0.00117336	0.000890238	0.00125625	0.00097399	0.00114981	0.00103534	0.00115818	0.00139058	0.000826553	0.00120928	0.000519083	0.00101472	0.00112513	0.001139	0.00111502	0.00126449	0.000913727	0.00103524	0.00089094	0.00105581	0.00139907	0.00136213	0.00114422	0.00142106	0.000929778	0.000752229	0.00129268	0.0011881	0.00122609	0.00107773	0.00108822	0.000996007	0.000938066	0.00114281	0.00104435	0.000740525	0.000889374	0.0010486	0.000840623	0.00117443	0.00143774	0.000979662	0.00112312
K00266_glutamate_synthase_(NADPH/NADH)_small_chain	0.00243972	0.00212939	0.00251835	0.00283744	0.00213686	0.00259023	0.00261224	0.00256388	0.00237916	0.00237487	0.00250008	0.00256665	0.00294417	0.00234817	0.00276306	0.00244706	0.00276305	0.00241719	0.00288836	0.0025398	0.00260736	0.00245663	0.00246307	0.00267577	0.00264274	0.0025849	0.00282957	0.00219618	0.00262854	0.00229635	0.00222908	0.00276167	0.00279704	0.00262611	0.00255979	0.00277566	0.00276853	0.00296682	0.00336392	0.0023554	0.00245215	0.00241541	0.00223507	0.00276975	0.00266961	0.0026211	0.00267943	0.00227965
K00271_valine_dehydrogenase	0	0	0	0	0	0	0	0	0	0	0	0	0	0	0	0	3.05e-06	0	0	0	0	0	0	0	0	0	0	0	0	0	0	0	0	0	0	0	0	5.65e-06	0	0	0	0	0	0	0	0	0	0
K00274_monoamine_oxidase	0	0	0	0	0	0	0	0	0	0	0	0	0	0	0	0	0	0	0	0	4.33e-06	0	0	0	0	0	0	0	2.33e-06	0	0	3.5e-07	0	0	6.26e-07	0	6.4e-06	1.33e-05	0	0	0	0	0	0	0	0	0	0
K00275_pyridoxamine_5'-phosphate_oxidase	5.89e-05	4.04e-06	0	0	1.04e-05	0	0	0	0	0	0	0	0	0	0	1.84e-05	7.39e-06	1.83e-05	8.36e-06	1e-05	0	1.14e-05	2.01e-05	0	1.17e-05	0	0	0	0	0	1.68e-05	3.26e-06	0	0	3.14e-06	0	2.34e-05	9.45e-06	0	2.3e-05	7.2e-05	2.07e-05	0	3.09e-05	5.52e-06	0	6.85e-06	9.95e-06
K00276_primary-amine_oxidase	0	0	2.23e-06	0	3.04e-06	0	0	0	0	0	0	2.81e-06	1.44e-06	0	0	0	5.03e-06	0	0	0	7.11e-06	0	5.65e-06	0	1.7e-06	0	0	1.58e-05	0	0	2.23e-06	7.89e-07	0	0	0	0	0	0	0	6.72e-06	0	0	0	0	0	0	1.95e-06	0
K00277_protein-lysine_6-oxidase	0	0	0	0	0	0	0	0	0	0	0	0	0	0	0	0	0	0	0	0	0	0	4e-06	0	0	0	0	0	0	0	0	0	0	0	0	0	0	0	0	0	0	0	0	0	0	0	0	0
K00278_L-aspartate_oxidase	0.00156499	0.000593206	0.00104686	0.00167023	0.00150802	0.00143947	0.00266923	0.00130594	0.00105437	0.000811794	0.00151438	0.000970781	0.00210288	0.00226717	0.00164788	0.00201835	0.00206267	0.00117658	0.00173544	0.0015713	0.00126641	0.00107445	0.00186685	0.00156678	0.000735287	0.00125784	0.00177441	0.00106465	0.00165815	0.000961315	0.00181638	0.00114266	0.00125501	0.00113575	0.000956444	0.00146092	0.00162282	0.00111626	0.00182541	0.00148245	0.000959084	0.00138044	0.000547882	0.000958007	0.00158933	0.000958498	0.00171255	0.000988205
K00279_cytokinin_dehydrogenase	0	0	2.78e-06	0	0	0	0	0	0	0	0	0	0	0	0	0	0	0	0	0	0	0	0	0	0	0	0	0	7.57e-07	0	0	3.57e-07	0	0	0	0	0	0	0	0	0	0	0	0	0	0	0	0
K00280	0	0	0	0	0	0	0	2.18e-06	0	0	0	0	0	0	0	0	0	0	2.3e-06	2.91e-06	0	0	7.75e-07	0	3.27e-06	0	0	0	0	0	0	0	0	0	0	0	0	0	0	0	0	0	0	0	0	0	2e-06	0
K00281	8.9e-05	3.12e-06	7.31e-05	6.66e-05	0.000101246	3.35e-05	0.000547222	1.39e-05	2.3e-05	5.88e-06	0.000164467	8.82e-06	7.14e-06	0.000206536	6.63e-05	0.000173865	0.000122052	9.28e-05	7.68e-05	0.000165165	2.43e-05	9.71e-05	0.000114621	0.000102294	2.9e-06	3.76e-06	1.03e-05	2.17e-05	1.9e-05	7.25e-05	7.89e-05	1.2e-05	1.61e-05	4.83e-05	4.3e-05	3.43e-05	3.91e-05	2.16e-05	6.86e-06	2.9e-05	5.83e-05	6.73e-05	3.32e-06	9.52e-06	3.67e-06	5.65e-05	0.000163038	7.28e-05
K00282_glycine_dehydrogenase_subunit_1	3.41e-05	4.25e-05	0.000104353	0.000431607	8.93e-05	0.000342675	4.41e-05	0.000159793	0.000112059	0.000104376	7.17e-05	8.24e-05	0.000183143	0.000131742	7.68e-05	7.19e-05	7.82e-05	7.14e-05	6.06e-05	9.19e-05	0.000132129	0.000137977	0.000122961	0.000117298	5.83e-05	0.000111177	0.000197564	5.94e-05	0.000104058	6.88e-05	8.89e-05	9.27e-05	7.88e-05	0.000103147	0.000127948	0.000241846	9.55e-05	0.000106589	0.000101305	0.000131765	8.15e-05	0.000135789	8.2e-05	5.18e-05	9.74e-05	0.000118091	0.000105966	5.3e-05
K00283_glycine_dehydrogenase_subunit_2	0.000333808	0.000196601	0.00074189	0.000682059	0.000652284	0.000969055	0.000509515	0.000437734	0.000968216	0.000512704	0.00061966	0.000427628	0.000237573	0.00113201	0.000464489	0.000421956	0.000352084	0.000547517	0.00047967	0.000384788	0.000508619	0.000715056	0.000735202	0.000548881	0.000543964	0.000287975	0.000408399	0.000322399	0.000434432	0.000185688	0.000990151	0.000314768	0.000381399	0.000388886	0.00073236	0.00121391	0.000838164	0.000676439	0.000273316	0.000759665	0.000620749	0.000857275	0.000471709	0.000357836	0.000627025	0.000261204	0.000557461	0.000534882
K00284_glutamate_synthase_(ferredoxin)	0.000307612	0.000251678	0.000342967	0.000441706	0.000302706	0.000249799	0.000242242	0.000205977	0.000177764	0.000309032	0.000245403	0.000290441	0.000298375	0.000209071	0.000413165	0.000494733	0.000361342	0.000376334	0.000453158	0.000326086	0.000379424	0.000281992	0.000323648	0.000459519	0.000342418	0.000213375	0.000218622	0.000324846	0.00018646	0.000378187	0.000251963	0.000362357	0.000458294	0.00029595	0.000347244	0.000270944	0.000399228	0.000418931	0.000550004	0.000216984	0.000513662	0.00032412	0.000253222	0.000627254	0.000300039	0.000243161	0.000353531	0.000280009
K00285_D-amino-acid_dehydrogenase	0	0	0	0	0	1.68e-06	0	0	0	0	0	0	0	0	0	0	0	0	4.11e-06	0	1.11e-05	1.8e-05	0	0	0	2.61e-06	0	0	9.56e-07	0	8.42e-06	5.37e-06	0	0	2.43e-06	4.25e-06	0	0	0	0	0	0	0	5.45e-06	0	0	2.34e-06	5.2e-06
K00286_pyrroline-5-carboxylate_reductase	0.000225748	0.000538141	0.000288154	0.000101963	0.000241047	0.000268916	0.000136448	0.000429698	0.000415401	0.000459502	0.000237218	0.000396307	0.000254627	5.69e-05	0.000126064	0.000104076	5.58e-05	0.000309053	9.97e-05	0.000231006	0.000304035	0.000245435	7.2e-05	0.000147728	0.000384186	0.00035746	0.000256198	0.000195405	0.000340541	0.000452157	0.000138562	0.000471646	0.000355454	0.000467791	0.000344654	0.000126845	8.9e-05	0.000221206	0.000183712	0.000235844	0.000176521	0.000148305	0.000482957	0.000298531	0.000253796	0.00049698	0.000159152	0.000403905
K00287_dihydrofolate_reductase	0.000342844	0.00110582	0.000470905	0.000548775	0.000354529	0.000598534	0.000336689	0.000582876	0.00052732	0.000591343	0.000311615	0.000714137	0.00049057	0.000224928	0.000152025	6.48e-05	2.54e-05	0.000516306	9.03e-05	0.000267824	0.000438227	0.000430835	0.00036276	0.00028234	0.000533389	0.000565883	0.000437068	0.000297043	0.000535378	0.000465435	0.000293648	0.000563848	0.000391179	0.000575489	0.00059255	0.00012001	7.95e-05	0.000187244	0.000217367	0.000472627	0.000338932	0.000300101	0.000798368	0.000288927	0.00050049	0.000658694	0.00019919	0.000523936
K00288_methylenetetrahydrofolate_dehydrogenase_(NADP+)	2.23e-07	1.78e-06	8.66e-07	1.3e-06	4.63e-07	5e-07	9.77e-07	2.48e-07	1.7e-06	6.16e-07	1.7e-06	8.39e-07	2.61e-07	5.8e-07	9.59e-07	1.49e-06	1.2e-06	9.64e-07	1.87e-06	4.79e-07	7.19e-07	1.54e-06	1.15e-06	1.64e-06	8.12e-07	6.61e-07	4.67e-07	1.95e-06	8.34e-07	9.77e-07	7.46e-07	7.26e-07	4.86e-07	8.49e-07	6.18e-07	2.02e-06	1.48e-06	1.36e-06	6.62e-07	1.28e-06	1.76e-06	1.79e-06	6.89e-07	4.31e-07	4.52e-07	4.85e-07	2.12e-06	1.87e-06
K00289_formyltetrahydrofolate_dehydrogenase	0	0	0	0	0	0	0	0	0	0	0	3.32e-06	0	0	0	0	1.44e-06	0	0	0	0	0	0	0	0	0	0	0	0	0	0	0	0	0	0	0	0	0	0	0	0	0	0	0	0	0	0	0
K00290_saccharopine_dehydrogenase_(NAD+,_L-lysine_forming)	0.00258853	0.000829946	0.00213108	0.00347155	0.00313345	0.00232579	0.00244436	0.00216837	0.00213435	0.00150405	0.00235032	0.00194143	0.00316327	0.00375872	0.00268106	0.00164364	0.00252885	0.00196488	0.0029794	0.00219593	0.002183	0.00175135	0.00288313	0.00263017	0.00205489	0.00218242	0.00299438	0.00260513	0.00283893	0.00155985	0.00308274	0.00207233	0.00254182	0.00179343	0.00172714	0.00307355	0.00294798	0.00247898	0.00407067	0.0024599	0.00172722	0.00276172	0.00125137	0.00267441	0.00343905	0.0015571	0.00307791	0.00155925
K00292_saccharopine_dehydrogenase_(NAD+,_L-glutamate_forming)	0	0	0	0	0	0	0	0	0	0	0	0	0	0	0	0	0	0	0	0	0	0	0	0	0	0	0	0	1.36e-06	0	0	0	0	0	0	0	0	0	0	0	0	0	0	0	0	0	0	0
K00293_saccharopine_dehydrogenase_(NADP+,_L-glutamate_forming)	0	0	0	0	0	0	0	0	0	0	0	0	0	0	0	8.89e-06	0	0	0	0	0	0	0	0	0	0	0	0	1.32e-06	0	0	0	0	0	0	0	0	0	0	0	0	0	0	0	0	0	0	0
K00294_1-pyrroline-5-carboxylate_dehydrogenase	3.92e-06	4.67e-06	1.08e-05	4.41e-06	0	3.57e-05	7.88e-06	9.21e-06	2.36e-05	6.73e-06	1.26e-05	3.92e-06	4.05e-06	2.8e-05	1.24e-05	0	1.82e-05	3.59e-06	3.27e-06	3.51e-05	0	4.69e-06	7.93e-06	9.02e-06	2.36e-06	0	1.04e-05	1.92e-05	1.22e-05	0	1.49e-05	5.62e-06	1.34e-05	0	1.96e-05	6.34e-05	9.31e-06	2.25e-05	3.97e-06	1.84e-05	7.68e-06	3.95e-06	0	0	0	4.56e-05	2.48e-05	1.16e-05
K00297_methylenetetrahydrofolate_reductase_(NADPH)	0.000374063	0.000593725	0.000255295	0.000237371	0.000149993	0.000336889	0.000158504	0.000333213	0.000252635	0.000381749	0.000232324	0.000344269	0.000344087	8.67e-05	0.000181409	0.00011501	0.000106763	0.000201417	0.000145992	0.000245603	0.000198782	0.000270005	0.000187356	0.000236626	0.000370431	0.000344005	0.000367882	0.000397202	0.000283689	0.000286829	0.00017855	0.000383237	0.000271737	0.00033798	0.000302364	0.000160524	0.000199748	0.000196661	0.000228177	0.000291488	0.000134362	0.00025842	0.000351593	0.000272883	0.000309027	0.000379723	0.000191004	0.000263961
K00298_N5-(carboxyethyl)ornithine_synthase	0	1.3e-06	0	0	0	0	0	5.08e-06	0	0	0	0	3.35e-06	0	0	0	5.02e-06	0	0	0	0	7.7e-06	6.57e-06	0	0	0	0	0	0	0	0	0	2.78e-06	1.06e-05	2.06e-06	0	0	0	0	0	0	0	0	6.95e-06	3.44e-06	0	7.62e-06	1.93e-05
K00299_FMN_reductase	0	0	0	0	0	0	0	0	0	0	0	0	0	0	0	0	0	0	2.8e-05	0	0	0	0	0	0	0	0	0	0	0	7.04e-06	2.53e-06	0	0	0	0	0	0	0	0	0	0	0	0	0	0	0	0
K00301_sarcosine_oxidase	0	0	0	0	0	0	0	3.76e-06	0	0	0	0	0	0	0	0	0	0	0	5.63e-06	0	0	0	0	0	0	0	0	1.99e-06	0	6.33e-07	0	0	0	0	0	0	0	0	0	0	0	0	0	0	0	0	0
K00302_sarcosine_oxidase,_subunit_alpha	4.31e-05	4.42e-05	4.22e-05	8.89e-05	5.15e-05	0.000140697	5.31e-05	4.75e-05	0.000131863	1.9e-05	4.16e-05	6.07e-05	1.3e-05	3.61e-05	4.35e-05	7.4e-05	7.52e-05	4.67e-05	5.93e-05	6e-05	5.5e-05	5.05e-05	6.87e-05	8.08e-05	6.39e-05	4.84e-05	4.18e-05	0.000123537	5.49e-05	4.3e-05	6.49e-05	3.29e-05	7.46e-05	3.98e-05	5.15e-05	4.66e-05	8.22e-05	0.000132277	4.75e-05	8.39e-05	7.58e-05	4.99e-05	7.85e-05	6.5e-05	5.89e-05	2.06e-05	8.02e-05	3.72e-05
K00303_sarcosine_oxidase,_subunit_beta	5.69e-06	2.15e-06	3.54e-06	0	5.52e-06	5.75e-06	5.63e-06	4.44e-06	1.14e-05	4.88e-06	9.34e-06	0	5.86e-06	1.62e-05	8.98e-06	0	1.63e-05	5.24e-06	4.76e-06	0	6.18e-06	6.05e-06	5.15e-06	1.89e-05	1.37e-05	9.06e-06	5.63e-06	2.63e-05	4.31e-06	0	2.85e-06	4.72e-06	1.65e-05	3.72e-06	8.97e-06	4.55e-06	4.5e-06	0	2.97e-05	6e-06	1.06e-05	0	7.2e-06	6.08e-06	3.01e-06	6.61e-06	2.67e-06	1e-05
K00304_sarcosine_oxidase,_subunit_delta	0	0	0	0	0	0	0	0	0	0	0	0	0	0	0	0	0	0	0	0	0	2.45e-05	0	0	0	0	0	0	0	0	0	1.69e-06	0	0	3.01e-06	7.12e-06	0	0	0	0	0	0	0	0	0	0	0	0
K00305_sarcosine_oxidase,_subunit_gamma	0	0	0	1.17e-05	0	0	0	0	0	0	0	0	0	0	0	0	0	0	0	0	0	0	0	0	0	0	0	0	0	0	0	0	0	0	0	0	0	0	0	0	0	0	0	0	0	0	0	0
K00306_L-pipecolate_oxidase	0	0	0	0	0	0	0	0	0	0	0	0	0	0	0	0	0	0	0	0	0	0	0	0	0	0	0	0	0	0	0	0	0	0	0	0	0	0	0	0	0	0	0	0	0	0	1.22e-06	0
K00308_polyamine_oxidase	0	0	0	0	0	0	0	0	0	0	0	0	0	0	0	0	0	0	0	0	0	0	0	0	0	0	0	0	0	0	0	0	0	0	0	0	0	0	0	0	0	0	0	0	0	0	9.82e-07	0
K00311_electron-transferring-flavoprotein_dehydrogenase	0	7.74e-07	5.27e-06	0	0	1.23e-06	3.86e-06	0	0	0	0	3.74e-06	0	5.47e-06	0	7.13e-06	5.61e-06	0	0	0	0	1.34e-05	0	4.37e-06	0	1.88e-06	0	9.29e-06	3.7e-06	0	3.95e-06	1.5e-05	0	0	4.17e-06	3.26e-06	0	3.52e-06	0	4.52e-06	0	0	0	0	0	0	2.71e-06	0
K00312_wingless-type_MMTV_integration_site_family,_member_3	0	0	0	0	0	0	0	0	0	0	0	0	0	0	7.48e-06	0	0	0	0	0	0	0	0	0	0	0	0	0	0	0	0	0	0	0	0	0	0	0	0	0	0	0	0	0	0	0	1.13e-06	0
K00313_electron_transfer_flavoprotein-quinone_oxidoreductase	0	1.95e-06	3.44e-06	5.28e-06	5.29e-06	1.67e-06	0	3.87e-06	4.95e-06	4.14e-06	8.06e-06	0	2.55e-06	0	0	0	0	9.06e-06	1.65e-05	4.96e-06	1.08e-05	0	4.95e-06	0	2.9e-06	2.56e-06	1.63e-06	0	0	0	1.5e-05	3.91e-06	0	1.62e-06	7.89e-07	4.2e-06	0	0	0	2.93e-05	0	1.03e-05	0	5.16e-06	5.15e-06	0	1.16e-06	0
K00314_sarcosine_dehydrogenase	0	5.21e-07	0	0	2.7e-06	0	0	0	0	0	0	2.39e-06	0	0	0	4.64e-06	0	0	2.09e-06	0	0	0	2.65e-06	2.61e-06	1.36e-06	1.4e-06	0	0	9.73e-07	0	3.28e-07	4.54e-07	2.13e-07	0	0	0	0	0	0	8.62e-07	0	0	0	0	0	0	2.92e-07	0
K00315_dimethylglycine_dehydrogenase	0	0	0	0	0	0	0	0	0	0	0	0	0	0	0	0	4.08e-06	0	0	2.65e-06	0	2.87e-06	2.67e-06	0	0	0	8.73e-07	0	5.18e-07	0	1.38e-06	9.08e-07	9.03e-07	0	0	0	0	2.49e-06	0	2.24e-06	0	0	3.68e-06	0	0	0	8.81e-07	0
K00318_proline_dehydrogenase	0	1.08e-06	0	0	0	7.28e-06	5.43e-06	0	0	9.26e-06	0	0	0	1.54e-05	0	0	0	0	0	1.62e-05	0	0	0	0	0	0	0	0	2.12e-06	1.43e-05	2.13e-06	2.02e-06	6.91e-06	0	1.73e-06	1.38e-05	0	0	0	6.5e-06	0	0	0	5.77e-06	0	1.57e-05	1.01e-05	5.34e-06
K00319_methylenetetrahydromethanopterin_dehydrogenase	0	0	0	0	0	0	0	0	0	0	0	0	0	0	0	0	0	0	0	0	0	0	0	0	0	0	0	0	0	0	0	6.75e-07	0	0	0	0	0	0	0	0	0	0	0	0	0	0	0	0
K00320_coenzyme_F420-dependent_N5,N10-methenyltetrahydromethanopterin	0	1.23e-06	0	0	0	0	0	0	0	0	0	0	0	0	0	0	4.83e-06	0	0	0	0	0	0	0	0	0	0	0	1.21e-06	0	8.78e-07	0	0	0	1.99e-06	2.84e-06	0	5.9e-06	0	0	0	0	0	0	0	0	0	0
K00322_NAD(P)_transhydrogenase	0	0	0	0	0	0	0	0	0	0	0	0	0	0	0	0	0	0	3.8e-06	0	0	0	0	0	0	0	0	1.09e-05	0	0	6.56e-06	1.95e-06	0	0	8.76e-07	0	0	0	0	5.37e-06	0	0	0	0	0	0	0	0
K00323	1.07e-07	0	3.35e-07	0	5.42e-08	0	0	0	0	0	0	0	0	0	0	0	0	0	0	0	0	0	0	0	0	0	0	0	0	0	0	1.86e-07	0	0	0	4.18e-08	2.6e-08	0	0	6.32e-08	0	5.54e-08	0	0	0	0	0	0
K00324_NAD(P)_transhydrogenase_subunit_alpha	0.000230815	0.000912371	0.000308013	2.98e-05	0.000284199	0.000384549	0.000236156	0.000578492	0.000479086	0.000504122	0.000305939	0.000615261	0.000172487	7.51e-05	0.000103472	0.000112105	0.000120498	0.000393792	6.81e-05	0.000287201	0.00054293	0.00037825	0.000168082	0.000206285	0.000484286	0.000489606	0.000305548	0.000249805	0.000441207	0.000376812	0.000206515	0.000519249	0.000266979	0.000524902	0.000461612	0.000118984	6.37e-05	0.000166945	1.15e-05	0.000317976	0.000201343	0.000291131	0.000584143	0.00017569	0.000350137	0.000761873	0.000195918	0.000537777
K00325_NAD(P)_transhydrogenase_subunit_beta	0.000330474	0.000719998	0.000256515	3.77e-05	0.000323309	0.000299109	0.000224622	0.000418464	0.00047905	0.000409538	0.000226588	0.000347537	0.000163248	0.000159184	0.0001132	0.000209293	0.000239418	0.000448837	0.000146395	0.000303869	0.000452645	0.000268835	0.000211206	0.000566947	0.000443549	0.000388339	0.000262139	0.00019593	0.00039357	0.0003538	0.000177174	0.000454486	0.000302134	0.000406886	0.000366019	8.02e-05	0.000135141	0.000138969	1.86e-05	0.000316886	0.000117651	0.000185351	0.000528046	0.000210387	0.000278355	0.000609566	0.000151031	0.000334233
K00327_NADPH-ferrihemoprotein_reductase	0	0	0	0	0	0	0	0	0	0	0	3.02e-06	0	0	0	0	0	0	0	0	0	3.68e-06	0	0	0	0	0	0	0	0	0	0	0	0	0	0	0	0	0	0	5.65e-06	0	0	0	0	0	0	0
K00328_inositol-polyphosphate_multikinase	0	0	0	0	0	0	0	0	0	0	0	0	0	0	0	0	0	0	0	0	0	0	0	0	0	0	0	0	0	0	0	0	0	0	0	0	0	0	0	0	0	0	0	0	0	0	2.32e-06	0
K00329_NADH_dehydrogenase	0	1.14e-06	0	0	0	1.25e-07	0	0	1.03e-06	3.91e-06	0	0	1.91e-07	0	5.33e-07	0	0	0	0	0	3.67e-07	0	3.75e-07	4.27e-07	0	3.02e-06	1.57e-06	7.55e-07	9.04e-08	0	8.52e-08	9.1e-07	8.84e-06	0	3.63e-07	3.93e-06	0	0	0	4.88e-07	6.95e-07	0	0	0	0	4.86e-07	0	0
K00330_NADH_dehydrogenase_I_subunit_A	0.000349729	9.82e-05	0.000202067	0.000568843	0.000376788	0.000483186	0.000292617	0.000517079	0.000257694	0.000267919	0.000149694	0.00032815	0.000984622	0.000445345	0.000667563	0.000238976	0.000581782	0.000186451	0.00067657	0.000420488	0.000338899	0.000261232	0.000427056	0.000506375	0.000254179	0.000468525	0.000800426	0.000269013	0.00057965	7.8e-05	0.000249144	0.0003621	0.000376672	0.000318686	0.000300573	0.000640855	0.000320239	0.000298269	0.000651821	0.000478138	0.000412598	0.000343295	5.18e-05	0.000314355	0.000476155	0.000299184	0.000443957	0.000357863
K00331_NADH_dehydrogenase_I_subunit_B	0.000321995	8.48e-05	0.000199997	0.000757703	0.000386352	0.000645062	0.000435727	0.000507957	0.00054762	0.000396591	0.000272425	0.000240177	0.000469381	0.0006182	0.000402579	0.000120259	0.000431649	0.000308831	0.000367629	0.00034045	0.000323724	0.000347211	0.000517728	0.000394154	0.000221243	0.000374501	0.000445985	0.000368807	0.000483654	0.000170762	0.000592059	0.000328467	0.000406832	0.000300346	0.000441789	0.000738564	0.000435581	0.000285842	0.000384349	0.000562555	0.000279196	0.000485654	0.00013719	0.000294229	0.000636601	0.000165713	0.000488241	0.000328228
K00332_NADH_dehydrogenase_I_subunit_C	2.44e-05	3.2e-06	5.82e-06	0	0	0	0	1.26e-05	8.03e-06	0	0	8e-06	0	1.11e-05	0	0	9.75e-06	0	0	0	2.21e-05	1.03e-05	0	0	1.6e-05	0	7.13e-06	0	3.72e-06	0	3.44e-06	7.39e-06	1.26e-05	5.47e-06	2.86e-06	1.59e-05	0	0	8.36e-06	0	3.46e-05	8.96e-06	0	0	0	1.21e-05	8.3e-06	9.94e-06
K00333_NADH_dehydrogenase_I_subunit_D	2.07e-05	5.01e-06	1.06e-05	2.73e-05	1.12e-05	1.04e-05	1.38e-05	1.22e-05	2.09e-05	4.48e-06	8.58e-06	2.11e-05	1.07e-05	7.43e-06	0	0	3.32e-05	2.04e-05	8.55e-06	2.36e-05	1.15e-05	4.29e-05	1.41e-05	0	3.13e-06	5.57e-06	1.39e-05	1.29e-05	4.68e-06	1.47e-05	8.81e-06	1.19e-05	1.96e-05	3.41e-06	1.8e-05	1.54e-05	4.13e-06	4.98e-06	1.07e-05	1.77e-05	2.86e-05	1.08e-05	2.93e-05	5.47e-06	0	3.02e-06	2.56e-05	3.66e-05
K00334_NADH_dehydrogenase_I_subunit_E	0.000237156	0.000169071	0.000389893	0.000250391	0.000210925	0.000198612	0.000222041	8.17e-05	0.000208612	0.000214742	0.000323514	0.000248984	1.32e-05	0.000279644	0.000204839	0.000560181	0.00036892	0.000302516	0.000653795	0.000117633	0.000185697	0.000371868	0.000251143	0.000341096	0.000251473	0.000110187	8.18e-05	0.000194404	0.000105747	0.000241275	0.000462917	0.000183427	0.000204784	0.000223923	0.000265341	0.000315991	0.000421115	0.000586327	0.000204191	0.000264094	0.000220841	0.000460483	0.000255202	0.000302008	0.000157833	0.000137884	0.000334645	0.000256998
K00335_NADH_dehydrogenase_I_subunit_F	0.00103217	0.00064448	0.0011835	0.0011323	0.00103174	0.00106698	0.00109037	0.00063735	0.00113187	0.000624946	0.00107649	0.00091494	0.00017095	0.00119777	0.00103998	0.00183505	0.00216278	0.00101177	0.00175263	0.00121335	0.000673155	0.00149581	0.00139115	0.00147073	0.00105875	0.000565121	0.000301966	0.0014213	0.000454786	0.0013926	0.00125256	0.000417865	0.000789355	0.000622046	0.000821478	0.00129471	0.00150273	0.00195414	0.000439755	0.000996507	0.00176457	0.00155571	0.001014	0.000833728	0.000778446	0.000541499	0.00142857	0.00140519
K00336_NADH_dehydrogenase_I_subunit_G	0.000134029	0.000121875	0.000251377	0.000272503	0.000209484	0.000165048	0.000175413	0.000153985	0.000201703	0.000122943	0.000200884	0.000178202	8.5e-05	0.000203444	0.000224595	0.000237885	0.000321034	0.00015079	0.000323722	0.000174539	0.000177341	0.000323624	0.000243525	0.00022161	0.000227673	0.00016373	9.94e-05	0.000291128	9.56e-05	0.000254099	0.000197025	0.000149342	0.000170638	0.000116229	0.000231124	0.000246994	0.000304183	0.000404057	0.000165456	0.000141599	0.000267177	0.00027157	0.000190826	0.00020196	0.000203183	7.92e-05	0.000259582	0.000297123
K00337_NADH_dehydrogenase_I_subunit_H	0.000627011	0.000130498	0.000308851	0.000924569	0.000562155	0.000623216	0.000588501	0.000612603	0.000373851	0.000242548	0.000194343	0.000383079	0.000964681	0.000752029	0.000846863	0.000273175	0.000805933	0.000240054	0.000679594	0.000477785	0.000462174	0.000323343	0.000739637	0.000664866	0.000383094	0.000603145	0.000909358	0.000483442	0.000728968	0.000274838	0.000696425	0.000512455	0.000563783	0.000450881	0.000338243	0.000680094	0.000771728	0.000653391	0.000947037	0.000478447	0.000264115	0.000609081	0.000132888	0.000371851	0.000746947	0.00033608	0.000673051	0.000263074
K00338_NADH_dehydrogenase_I_subunit_I	0.000400453	0.000109465	0.000182518	0.000558744	0.000343253	0.000472139	0.000365199	0.000360585	0.000234307	0.000345385	0.000230704	0.000280196	0.00068168	0.000316822	0.000489802	0.000221929	0.00049277	0.000211748	0.000511671	0.00044564	0.000297658	0.0001693	0.000459748	0.000466604	0.000262934	0.000544192	0.000654933	0.000830121	0.000596965	0.000286846	0.000234407	0.000380008	0.000553531	0.000438647	0.00031357	0.000607883	0.000450763	0.000302695	0.000416962	0.00052759	0.00019192	0.000284799	0.000134391	0.000370249	0.000555833	0.000228138	0.000441777	0.000332567
K00339_NADH_dehydrogenase_I_subunit_J	4.93e-05	7.36e-06	3.43e-05	0.000277945	6.43e-05	0.000185766	4.93e-05	0.0001238	2.47e-05	3.17e-05	4e-05	7.22e-05	0.000100319	0.000188063	5.82e-05	4.53e-05	7.58e-05	2.31e-05	6.15e-05	7.4e-05	2.69e-05	7.24e-05	9.99e-05	2.88e-05	7.54e-06	5.87e-05	4.86e-05	5.81e-05	0.00010996	1.72e-05	4.82e-05	5.84e-05	7.83e-05	3.6e-05	6.78e-05	0.000144999	3.92e-05	2.36e-05	0.000110733	5.73e-05	4.61e-05	5.04e-05	0	3.95e-05	4.53e-05	2.9e-05	7.3e-05	2.38e-05
K00340_NADH_dehydrogenase_I_subunit_K	2.09e-05	4.16e-06	0	0	2.26e-05	2.11e-05	4.2e-05	1.63e-05	2.09e-05	1.79e-05	0	0	2.15e-05	0.000119185	0	0	0	0	1.78e-05	2.09e-05	0	0	0	2.4e-05	1.26e-05	0	2.07e-05	0	4.07e-06	0	1.11e-05	1.85e-05	0	1.37e-05	9.96e-06	6.23e-05	0	2e-05	0	0	0	2.17e-05	0	0	1.11e-05	1.22e-05	9.8e-06	0
K00341_NADH_dehydrogenase_I_subunit_L	0.000771596	0.000161561	0.000363221	0.000991556	0.000663177	0.000818596	0.000734745	0.000713112	0.000497998	0.000379072	0.00038964	0.000502678	0.00127725	0.0010891	0.000826493	0.000445776	0.000899496	0.000366117	0.000942914	0.000588005	0.000674462	0.000407077	0.000847964	0.000845164	0.000373364	0.000747039	0.00108427	0.000708363	0.0008478	0.000401552	0.000807188	0.000580666	0.000764115	0.000486574	0.000476771	0.000930342	0.000812415	0.000647501	0.00097288	0.000779367	0.000492875	0.000513672	0.000163205	0.000461853	0.00100705	0.000392163	0.000707736	0.000343705
K00342_NADH_dehydrogenase_I_subunit_M	0.000668482	0.000145031	0.000338632	0.0011995	0.000905644	0.000982752	0.00094743	0.00075035	0.000979638	0.000471647	0.000575141	0.000489703	0.00104707	0.00152867	0.000876779	0.000300999	0.000764347	0.000299903	0.000655175	0.000577158	0.000776054	0.000320944	0.000856472	0.000785724	0.000302435	0.000620927	0.000931931	0.000633648	0.000837907	0.000422515	0.001326	0.000565934	0.000728218	0.000449297	0.000593195	0.00117351	0.00079901	0.000568066	0.000925456	0.000850453	0.000380318	0.000749038	0.00019269	0.000451294	0.00117615	0.000330098	0.000655927	0.000262024
K00343_NADH_dehydrogenase_I_subunit_N	0.0002135	4.43e-05	0.000108087	0.000184775	0.000219975	0.000188663	0.000120504	0.000145738	0.000151413	0.000148641	0.000117159	0.000115555	0.000253808	0.000209268	0.000168089	5.77e-05	0.000157591	0.000114551	0.000192742	0.000168161	0.000159151	0.000110055	0.00014365	0.000127809	7.75e-05	0.000144034	0.00024331	0.000162664	0.000187589	8.17e-05	0.000198827	0.000131097	0.00013657	0.000119219	0.000146077	0.000206219	0.000198746	0.000127439	0.000176039	0.000199445	8.31e-05	0.00014291	2.51e-05	0.000152209	0.000211486	0.000113612	0.000159353	0.000105193
K00344_NADPH2quinone_reductase	0	0	0	7.09e-06	6.83e-06	0	0	0	0	0	0	0	0	0	0	0	1.52e-05	0	0	6.32e-06	0	0	0	0	3.94e-06	0	2.15e-06	0	0	9.19e-06	4.66e-06	5.78e-07	0	0	0	0	0	0	0	2.11e-05	0	0	9.04e-06	0	0	0	0	6.19e-06
K00346_Na+-transporting_NADHubiquinone_oxidoreductase_subunit_A	0.000119562	3.04e-05	6.31e-05	5.59e-05	0.000102577	0.000109062	0.000115141	0.000100831	2.87e-05	6.95e-05	6.26e-05	0.000100048	0.000172157	0.000210416	0.000135782	7.04e-05	0.000144014	6.59e-05	0.000171859	0.000100057	0.000103691	6.77e-05	0.00012515	0.000120525	8.04e-05	0.000119318	0.000173331	7e-05	0.000124472	7.43e-05	6.85e-05	9.06e-05	0.000140845	6.87e-05	3.03e-05	0.000131849	0.000124671	8.65e-05	0.000144467	4.52e-05	8.05e-05	8.91e-05	2.03e-05	6.63e-05	8.83e-05	6.93e-05	0.000111943	4.71e-05
K00347_Na+-transporting_NADHubiquinone_oxidoreductase_subunit_B	0.000498505	8.01e-05	0.000257048	0.000372771	0.000475105	0.000416843	0.000818123	0.00040386	0.000303537	0.000230241	0.000399834	0.000230109	0.000672145	0.000570346	0.00064062	0.00053211	0.000685317	0.000255862	0.000614338	0.00040451	0.000340368	0.000238035	0.000524389	0.00044701	0.000273162	0.000440802	0.00066062	0.000320153	0.000510824	0.0002694	0.000447684	0.000336669	0.000451126	0.000344967	0.000226974	0.000444808	0.000569067	0.000330739	0.000581014	0.000271728	0.000284564	0.000258264	0.000123092	0.000244648	0.000502477	0.000302064	0.000418432	0.00022075
K00348_Na+-transporting_NADHubiquinone_oxidoreductase_subunit_C	6.62e-05	1.63e-05	3.72e-05	4.01e-05	8.78e-05	8.47e-05	7.94e-06	3.52e-05	1.8e-05	1.54e-05	3.11e-05	8.98e-06	9.6e-06	0.000118389	2.88e-05	0	1.47e-05	2.49e-05	7.89e-06	3.64e-05	4.01e-05	1.07e-05	6.44e-05	5.31e-05	4.75e-06	1.44e-05	2.99e-05	0	2.49e-05	4.88e-05	5.04e-05	2.35e-05	1.06e-05	9e-06	3.74e-05	8.03e-05	7.23e-05	3.53e-05	0	0.000123827	6.22e-05	9.45e-05	0	3.84e-05	2.49e-05	1.63e-05	4.09e-05	2.83e-05
K00349_Na+-transporting_NADHubiquinone_oxidoreductase_subunit_D	0.000325361	7.47e-05	0.000176114	0.000552677	0.000350622	0.000393324	0.000560967	0.000333412	0.000407003	0.000260471	0.00044978	0.00038466	0.000548926	0.000912102	0.000337491	0.000188413	0.000384468	0.000158537	0.000339525	0.000253399	0.000352889	0.000203635	0.000410523	0.000595685	0.000250512	0.000328876	0.000482115	0.000322154	0.000446195	0.000142972	0.000586766	0.000255785	0.000399158	0.000272181	0.000241814	0.000466803	0.000458085	0.000416242	0.000423447	0.00023957	0.000152166	0.000305385	8.57e-05	0.000422072	0.000649647	0.00018267	0.000290163	0.000140712
K00350_Na+-transporting_NADHubiquinone_oxidoreductase_subunit_E	0.000214398	5.09e-05	0.000236399	0.000481624	0.00011149	0.000358954	0.000398397	0.000248388	9.26e-05	0.000272766	0.000435682	0.000195251	0.000311854	0.000541009	0.000210756	0.000191045	0.000315085	0.000171262	0.000240184	0.000174607	0.000200585	0.000194634	0.00017426	0.000271564	0.000160404	0.000256863	0.000368778	0.000100018	0.000321284	0.000114107	0.00022713	0.000179443	0.000179568	0.000180863	0.000146774	0.00032215	0.000260549	0.000148109	0.000342133	0.000109344	9.71e-05	0.000301066	7.24e-05	0.000220364	0.000253863	0.000143264	0.000223641	0.000112017
K00351_Na+-transporting_NADHubiquinone_oxidoreductase_subunit_F	0.00137301	0.00027657	0.00104368	0.0013822	0.00143065	0.00130661	0.00237976	0.00121426	0.0015557	0.000874118	0.00178682	0.000947318	0.00162037	0.00295012	0.00160172	0.00151846	0.0016801	0.000860175	0.00143109	0.00136523	0.00116168	0.00108624	0.00142499	0.00177471	0.000723277	0.00110498	0.00154007	0.00115746	0.00151301	0.000777793	0.00243207	0.000872652	0.00124506	0.000922895	0.00100823	0.0020265	0.00177881	0.00100638	0.0015276	0.00134471	0.000842238	0.00142663	0.000489638	0.00103179	0.00185629	0.000738838	0.00133752	0.000623612
K00354_NADPH2_dehydrogenase	0	0	0	0	0	0	0	0	0	0	0	0	0	0	0	0	0	0	4.46e-06	0	0	0	5.39e-06	0	1.74e-06	0	0	0	0	0	0	1.71e-07	0	0	4.58e-07	0	0	0	0	0	0	0	0	0	0	0	0	0
K00355_NAD(P)H_dehydrogenase_(quinone)	0	0	0	0	0	0	0	0	0	0	0	0	0	0	0	0	0	0	0	0	0	0	0	0	0	0	0	0	6.63e-06	0	3.41e-07	0	8.52e-07	1.74e-06	0	0	1.64e-06	3.29e-06	0	0	0	0	0	0	0	0	0	0
K00356_NADH_dehydrogenase	0	3.3e-06	0	1.67e-06	0	1.61e-06	0	0	0	0	0	0	0	0	0	0	0	0	0	0	0	0	0	1.86e-05	0	3.27e-06	5.33e-06	0	0	0	8.11e-07	3.11e-07	2.63e-06	0	7.56e-07	2.2e-06	1.51e-05	0	0	0	0	0	0	0	0	0	0	6.1e-06
K00358	0.000131054	0.000850507	0.000225632	6.65e-05	0.000155626	0.000208682	0.000224998	0.000301465	0.000503919	0.000323801	0.000163652	0.000427118	0.000198975	8.89e-05	7.88e-05	0	0	0.000432461	2.08e-05	0.000309342	0.000273496	0.00042762	0.000149842	0.000100362	0.000446059	0.000438642	0.000236835	0.000138889	0.000332582	0.00036117	0.000118726	0.000376117	0.000259511	0.000484273	0.00035643	4.78e-05	2.46e-05	5.43e-05	1.3e-05	0.000218929	4.66e-05	0.000263763	0.000613967	0.000131884	0.00027362	0.000506162	0.000130445	0.000351012
K00359_NADH_oxidase	4.79e-06	1.7e-05	3.32e-06	3.04e-05	0	1.13e-05	0	1.12e-05	9.57e-06	8.2e-06	2.36e-05	1.91e-05	0	0	0	1.61e-05	1.84e-05	1.32e-05	4e-06	9.55e-06	0	4.49e-08	9.66e-06	5.52e-06	0	1.49e-05	3.16e-06	0	3.72e-06	0	4.38e-06	5.98e-06	8.17e-06	4.66e-06	9.11e-06	1.43e-05	6.88e-06	4.56e-06	4.9e-06	0	8.94e-06	9.76e-06	1.35e-05	5.11e-06	0	2.78e-06	4.48e-06	0
K00360_nitrate_reductase_(NADH)	0	0	0	0	0	0	0	0	0	0	0	0	0	0	0	0	0	0	0	0	0	0	0	0	1.39e-06	0	0	0	0	0	0	0	0	0	3.08e-07	0	0	0	0	0	0	0	0	0	1.23e-06	0	0	2.89e-06
K00362_nitrite_reductase_(NAD(P)H)_large_subunit	2.58e-06	9.27e-07	0	2.71e-06	5.55e-06	0	0	0	0	0	4.37e-06	0	0	0	7.7e-06	4.84e-06	7.95e-06	2.42e-06	2.1e-06	0	2.71e-06	2.73e-06	0	0	0	4.16e-06	3.23e-06	6.11e-06	4.4e-07	3.61e-06	5.3e-06	4.17e-06	1.01e-06	0	2.31e-06	3.24e-06	2.06e-06	4.6e-06	2.69e-06	8.49e-06	0	2.61e-06	0	0	0	0	1.14e-06	2.6e-06
K00363_nitrite_reductase_(NAD(P)H)_small_subunit	0	0	0	0	0	0	0	0	0	0	0	0	0	0	0	0	0	0	1.65e-05	0	0	0	0	0	0	0	0	0	0	0	4.84e-06	0	0	0	0	0	0	0	0	0	0	0	0	0	0	0	4.76e-06	1.6e-05
K00364_GMP_reductase	6e-05	2.22e-05	7.62e-05	0.000186664	0.000156344	4.07e-05	9.73e-05	4.63e-05	6.51e-06	5.17e-06	0	4.15e-05	0	8.55e-06	6.68e-05	1.08e-05	4.96e-06	0.00012329	3.02e-05	6.88e-05	0.000151279	2.19e-05	0.000109323	4.16e-05	9.49e-05	0	6.4e-06	1.49e-05	0	8.88e-06	6.69e-05	9.08e-05	4.71e-05	3.99e-06	2.61e-05	2.73e-06	5.3e-05	4.67e-05	0	2.83e-05	0.000137347	6.28e-05	4.94e-05	8.54e-05	0	1.04e-05	3.83e-05	1.25e-05
K00365_urate_oxidase	0	0	0	0	0	0	0	0	0	0	0	0	0	0	0	0	0	0	0	7.24e-06	0	0	0	0	0	0	2.41e-06	0	0	0	9.61e-07	0	0	0	0	0	0	0	0	0	0	0	0	0	0	0	0	0
K00366_ferredoxin-nitrite_reductase	4.13e-06	0	8.36e-06	4.09e-06	1.3e-05	0	0	0	0	3.54e-06	1.29e-05	0	2.12e-06	0	6.48e-06	0	0	1.14e-05	0	4.12e-06	1.34e-05	0	4.14e-06	4.6e-06	0	0	3.95e-06	1.85e-05	3.15e-06	5.83e-06	3.05e-06	1.42e-06	1.57e-06	5.37e-06	6.57e-07	0	0	0	0	0	0	8.51e-06	0	3.77e-06	0	0	3.8e-06	3.74e-06
K00367_ferredoxin-nitrate_reductase	0	0	0	0	0	0	2.91e-06	0	0	0	0	0	0	0	0	0	0	0	0	0	0	0	0	3.29e-06	0	0	9.58e-07	0	0	0	0	0	0	0	0	0	0	0	0	0	0	0	4.13e-06	0	0	0	0	0
K00368_nitrite_reductase_(NO-forming)	0	0	0	0	6.67e-06	0	0	0	0	0	0	0	0	0	0	0	0	5.4e-06	0	5.84e-06	0	0	6e-06	0	0	3.63e-06	2.08e-06	0	0	0	8.41e-07	0	0	0	0	0	0	0	0	0	0	6.16e-06	0	6.11e-06	0	0	0	0
K00369_nitrate_reductase	0	2.23e-07	0	0	0	0	0	0	0	0	2.45e-06	0	0	0	0	0	2.11e-07	0	2.55e-06	0	0	0	0	0	0	8.07e-07	0	0	0	0	0	4.26e-09	0	0	4.24e-08	0	0	0	0	2.05e-07	0	0	0	0	0	0	0	7.69e-07
K00370_nitrate_reductase_1,_alpha_subunit	5.23e-06	1.04e-06	7.22e-06	3.72e-06	3.57e-06	1.76e-06	5.25e-06	4.18e-06	0	0	0	1.66e-06	0	0	2.69e-06	3.43e-06	6.88e-06	1.12e-05	5.66e-06	8.69e-06	6.39e-06	4.77e-06	7.03e-06	5.97e-06	1.05e-06	2.77e-05	1.15e-06	1.27e-05	1.91e-06	9.8e-06	1.03e-05	9.78e-07	3.67e-06	1.13e-06	0	1.45e-06	4.14e-06	3.28e-06	0	1.22e-05	6.51e-06	7.22e-06	0	5.58e-06	0	1.01e-06	1.64e-06	1.21e-05
K00371_nitrate_reductase_1,_beta_subunit	4.48e-06	2.55e-06	2.85e-06	4.14e-06	1.74e-05	2.35e-06	4.49e-06	3.49e-06	0	0	1.3e-05	4.3e-06	2.15e-06	0	0	0	9.54e-06	4.12e-06	1.03e-05	4.21e-06	8.9e-06	0	1.26e-05	0	7.83e-06	4.14e-05	1.35e-06	3.04e-05	3.18e-06	6.32e-06	3.77e-06	7.36e-07	1.79e-06	2.73e-06	3.22e-07	0	0	3.95e-06	0	1.44e-05	7.92e-06	0	5.42e-06	1.4e-05	2.21e-06	0	9.38e-07	3.89e-06
K00372_nitrate_reductase_catalytic_subunit	3.06e-06	1.83e-06	0	2.53e-06	0	0	0	0	0	0	4.66e-06	0	0	0	0	0	6.75e-06	2.82e-06	7.16e-06	0	3.23e-06	2.86e-06	3.11e-06	0	0	4.64e-06	1.99e-06	0	5.95e-07	0	6.49e-07	1.4e-06	0	0	1.69e-06	6.16e-06	2.44e-06	2.71e-06	0	7.26e-06	1.69e-05	0	0	0	0	0	0	2.75e-06
K00374_nitrate_reductase_1,_gamma_subunit	0	9.18e-07	1.29e-05	0	0	0	0	0	0	0	0	0	0	0	0	0	0	3.53e-05	6.84e-06	4.6e-06	0	0	0	2.2e-05	0	0	0	0	0	0	8.57e-06	8.21e-07	0	0	0	0	0	0	0	0	1.79e-05	0	0	2.04e-05	0	0	2.24e-06	0
K00375_GntR_family_transcriptional_regulator_/_MocR_family_aminotransferase	2.76e-05	2.48e-05	3.22e-05	4.85e-06	3.54e-05	7.76e-06	9.15e-06	1.83e-05	0	2.5e-05	0	2.79e-05	4.56e-05	1.49e-05	1.47e-05	4.37e-05	2.11e-05	4.23e-06	3.86e-05	4.57e-06	5.15e-06	0	1.38e-05	1.57e-05	1.95e-05	2.4e-06	1.99e-05	0.000101212	1.19e-05	8.48e-05	1.25e-05	2.78e-05	2.97e-05	1.54e-05	4.81e-05	1.37e-05	1.46e-05	4.46e-05	2.89e-05	2.76e-05	8.86e-06	4.95e-05	1.96e-05	5.88e-05	7.1e-05	0	1.94e-05	2.28e-05
K00376_nitrous-oxide_reductase	2.87e-06	0	0	0	4.23e-05	0	0	2.47e-06	0	6.8e-06	0	0	3.66e-05	0	0	0	0	4.18e-06	0	0	4.08e-05	0	8.01e-06	0	0	0	0	1.28e-05	0	0	1.19e-05	0	3.39e-05	0	9.29e-05	0	0	3.16e-06	2.57e-06	0	0	0	0	0	2.35e-05	0	0	4.89e-06
K00378_hydroxylamine_reductase	0.00037863	0.000436694	0.000634521	0.00046882	0.000453175	0.0003477	0.000457526	0.000325354	0.000315511	0.000505657	0.000510311	0.000561505	0.000502847	0.000455625	0.000571884	0.000927329	0.000762686	0.000415248	0.00101281	0.000530774	0.000598192	0.000610161	0.000510218	0.000724203	0.000773615	0.000533792	0.000495217	0.00080848	0.000350449	0.000465593	0.000391742	0.000503286	0.000729182	0.000560657	0.000609334	0.000508525	0.000844716	0.000948544	0.00103747	0.000750064	0.00126148	0.00080231	0.000586163	0.000915059	0.000497171	0.000378605	0.000761265	0.000448202
K00380_sulfite_reductase_(NADPH)_flavoprotein_alpha-component	0	2.07e-07	0	0	1.53e-05	0	0	0	0	0	2.45e-06	0	0	0	0	0	0	0	3.61e-06	3.53e-06	0	0	3.57e-06	0	0	5.37e-07	0	0	6.75e-07	0	2.81e-06	1.06e-06	0	0	4.72e-07	0	0	0	0	0	0	3.67e-06	0	0	0	0	0	1.49e-06
K00381_sulfite_reductase_(NADPH)_hemoprotein_beta-component	0	0	2.69e-06	0	1.18e-05	1.3e-06	0	0	0	0	0	0	0	0	0	0	0	0	6.16e-06	0	0	4.38e-06	3.66e-06	0	0	1.99e-06	1.2e-06	8.98e-06	1.42e-06	5.18e-06	1.06e-05	9.2e-06	0	0	2.19e-06	1.64e-06	0	6.79e-06	4.01e-06	0	7.35e-06	3.84e-06	0	4.11e-06	1.92e-06	0	3.42e-06	0
K00382_dihydrolipoamide_dehydrogenase	6.14e-05	0.000217177	0.000141118	4.86e-05	0.000154259	0.000106206	5.89e-05	9.96e-05	0.000127884	0.000140088	8.8e-05	0.000130096	4.18e-05	3.32e-05	4.16e-05	2.62e-05	3.63e-05	0.000119169	2.6e-05	8.61e-05	5.2e-05	0.000142886	7.85e-05	6.2e-05	0.000102087	6.2e-05	6.94e-05	6.2e-05	8.97e-05	6.65e-05	0.000103798	0.000110055	6.59e-05	7.98e-05	0.000132716	0.000124689	8.6e-05	7.42e-05	1.88e-05	0.000103112	3.37e-05	0.000116107	0.000178763	0.00012364	4.55e-05	0.000126522	6.96e-05	0.000165121
K00383_glutathione_reductase_(NADPH)	4.73e-06	2.82e-06	1.33e-05	0	2.53e-05	1.6e-06	0	0	0	0	0	9.39e-06	0	1.33e-05	0	0	1.45e-05	1.73e-05	7.86e-06	1.42e-05	5.08e-06	1.11e-05	9.46e-06	5.44e-06	0	2.51e-06	3.13e-06	0	0	6.61e-06	8.62e-06	4.12e-06	4.02e-06	0	7.42e-07	0	1.5e-05	0	0	5.6e-06	0	0	6.58e-06	1.51e-05	0	2.73e-06	5.53e-06	0
K00384_thioredoxin_reductase_(NADPH)	0.00068786	0.000885547	0.000780346	0.00110257	0.000792823	0.00114789	0.0011114	0.00100694	0.00110726	0.00101373	0.000756255	0.00100187	0.00107525	0.000865892	0.000853643	0.000664833	0.00061514	0.00111567	0.00065796	0.00110541	0.000869562	0.000879479	0.0010463	0.000841315	0.000969411	0.000945549	0.000950198	0.000757633	0.000982636	0.000947501	0.00091033	0.000969622	0.000805304	0.00103989	0.00107406	0.000886151	0.000663077	0.000653164	0.000639316	0.000818615	0.000844489	0.000752653	0.00104252	0.000723379	0.000867726	0.00106592	0.000839752	0.000844056
K00385_anaerobic_sulfite_reductase_subunit_C	6.65e-06	2.79e-05	1.84e-05	7.09e-06	0	1.8e-05	6.63e-06	5.19e-05	6.69e-06	1.7e-05	2.19e-05	2.65e-05	2.75e-05	1.88e-05	2.09e-05	2.46e-05	6.59e-05	3.66e-05	1.65e-05	2.64e-05	7.26e-06	7.89e-06	6.69e-06	1.54e-05	3.99e-05	5.59e-05	1.31e-05	3.22e-05	1.3e-05	4.67e-05	8.72e-06	1.65e-05	2.29e-05	1.74e-05	2.97e-05	3.95e-05	1.05e-05	3.17e-05	4.11e-05	2.23e-05	3.72e-05	1.37e-05	2.81e-05	1.42e-05	1.77e-05	0	2.48e-05	3.29e-05
K00386	1.58e-05	0	1.1e-05	8.49e-06	0	1.34e-05	0	6.22e-06	1.58e-05	0	0	7.8e-06	8.2e-06	0	0	2.93e-05	6.09e-05	0	1.98e-05	7.8e-06	0	9.43e-06	2.4e-05	0	9.48e-06	1.67e-05	7.83e-06	1.91e-05	7.69e-06	0	6.27e-06	9.14e-06	1.36e-05	2.6e-06	1.26e-05	6.78e-06	1.88e-05	3.74e-05	8.15e-06	9.41e-06	1.46e-05	0	1.12e-05	0	4.13e-06	9.25e-06	1.12e-05	7.87e-06
K00387_sulfite_oxidase	0	0	0	0	0	0	0	0	0	0	0	0	0	0	0	0	0	0	0	0	0	0	0	4.71e-07	0	0	0	0	1.09e-06	0	0	0	0	0	0	0	0	0	0	0	0	0	0	0	0	0	0	0
K00389_putative_membrane_protein	0	0	0	0	1.7e-05	0	0	0	0	0	0	0	0	0	0	0	0	0	2.64e-05	0	1.59e-05	0	0	0	0	0	0	0	0	0	0	2.8e-06	0	0	0	6.73e-06	0	0	0	0	0	0	0	0	0	0	0	0
K00390_phosphoadenosine_phosphosulfate_reductase	0.000219824	9.45e-05	0.000245486	0.000243156	0.000203647	0.000256307	0.000189381	0.000118395	0.000174508	5.82e-05	3.57e-05	0.000136719	0.000218665	0.000121048	0.000410544	0.000202252	0.000319111	0.000175532	0.000358107	0.000185278	0.000254229	0.0001513	0.000167555	0.000321188	8.98e-05	0.000110483	0.000182177	0.000128333	0.0001787	0.000302319	0.000289339	7.37e-05	0.000115536	0.000125724	0.000116854	0.000211208	0.000267871	0.000203018	0.000199298	6.29e-05	0.000396528	0.00016347	4.8e-05	0.000171197	0.000163528	9e-05	0.000195918	0.00014457
K00392_sulfite_reductase_(ferredoxin)	0	0	0	0	0	0	0	0	0	0	0	3.1e-06	0	4.88e-06	0	0	0	3.11e-06	0	0	0	0	0	0	0	1.92e-06	0	0	0	0	4.75e-07	1.08e-06	0	0	8.14e-07	0	0	0	0	0	0	0	0	0	0	0	4.99e-08	0
K00394_adenylylsulfate_reductase,_subunit_A	0.000123873	0.00010964	0.000140522	0.000251996	0.000117012	0.000146682	6.41e-05	0.000114031	9.76e-05	0.000231192	7.98e-05	0.000108356	0.000243114	7.47e-05	0.000135757	0.000214465	0.000150751	0.00014488	0.00021896	0.000145903	0.000223926	5.75e-05	9.83e-05	0.000167751	0.00026334	0.000128972	0.000184059	0.000229121	0.000115784	0.000105857	0.000102342	0.000235626	0.00034716	0.000253677	0.00018589	0.000108613	0.000190004	0.000340227	0.000500386	0.000110806	0.000230917	0.000209976	0.000174384	0.000344358	0.000186066	0.000102439	0.000125277	8.89e-05
K00395_adenylylsulfate_reductase,_subunit_B	0	0	0	0	0	0	0	0	0	0	0	0	0	0	0	0	0	0	0	0	0	0	0	0	7.79e-06	0	0	0	0	0	0	0	0	0	0	0	0	0	0	1.61e-05	2.59e-05	0	0	0	0	0	0	0
K00399_methyl-coenzyme_M_reductase_alpha_subunit	3.79e-06	3.75e-06	0	0	0	2.58e-06	0	2.96e-06	0	6.61e-06	0	0	1.99e-06	5.3e-06	1.21e-05	0	0	0	3.23e-06	0	0	0	3.85e-06	4.32e-06	2.29e-06	0	0	0	1.47e-06	0	1.97e-06	6.86e-07	1.59e-06	1.22e-06	1.02e-05	9.53e-06	6.06e-06	0	0	4.56e-06	0	0	0	0	6.02e-06	0	1.8e-06	0
K00400_methyl_coenzyme_M_reductase_system,_component_A2	0	7.87e-07	2.74e-06	0	0	0	0	0	0	0	0	0	0	0	6.24e-06	0	3.05e-06	0	3.3e-06	0	0	0	0	0	0	0	0	0	0	0	5.2e-07	0	1.69e-06	1.29e-06	6.32e-07	1.68e-06	0	0	0	0	0	0	0	0	0	2.3e-06	0	0
K00401_methyl-coenzyme_M_reductase_beta_subunit	0	3.84e-06	0	0	5.18e-06	4.87e-06	0	3.75e-06	0	0	7.93e-06	9.63e-06	0	0	0	0	3.72e-06	0	4.03e-06	4.83e-06	0	0	4.85e-06	5.53e-06	8.69e-06	0	0	0	2.81e-06	0	6.97e-06	4.33e-07	0	6.3e-06	1.22e-05	1.02e-05	3.8e-06	0	0	5.68e-06	0	9.97e-06	0	0	0	5.6e-06	6.78e-06	4.75e-06
K00402_methyl-coenzyme_M_reductase_gamma_subunit	0	0	0	0	0	0	0	0	0	0	0	0	0	0	0	0	0	0	0	0	0	0	0	0	0	0	0	0	0	0	1.11e-06	7.54e-07	0	0	0	0	0	0	0	0	0	0	0	0	0	0	0	0
K00404_cb-type_cytochrome_c_oxidase_subunit_I	4.36e-06	6.05e-06	1.79e-05	0	7.1e-05	1.02e-05	1.31e-05	3.05e-05	3.91e-05	4.12e-05	7.14e-06	3.03e-05	5.15e-05	6.18e-06	6.89e-06	1.61e-05	1.68e-05	2e-05	1.82e-05	1.31e-05	7.09e-05	3.55e-05	3.83e-05	2.46e-05	1.31e-05	6.91e-06	4.29e-06	2.12e-05	1.4e-05	4.9e-05	2.91e-05	1.78e-05	3.7e-05	9.93e-06	9.89e-05	3.14e-05	4.48e-05	4.13e-06	1.81e-05	1.01e-05	8.15e-05	1.35e-05	1.22e-05	4.63e-06	3.22e-05	1.77e-05	3.55e-05	1.72e-05
K00405_cb-type_cytochrome_c_oxidase_subunit_II	9.45e-06	1.88e-06	1.3e-05	1e-05	7.06e-05	6.3e-06	0	4.3e-05	4.66e-05	3.99e-05	1.54e-05	9.06e-06	4.89e-06	0	2.91e-05	0	7.26e-06	8.66e-06	7.53e-06	0	2.1e-05	1.12e-05	2.94e-05	0	0	0	2.95e-06	6.65e-05	7.66e-06	1.32e-05	9.46e-06	1.21e-05	4.04e-05	3.09e-06	5.94e-05	1.18e-05	3.02e-05	0	0	0	3.43e-05	9.27e-06	0	0	2.5e-05	0	2.16e-05	5.72e-05
K00406_cb-type_cytochrome_c_oxidase_subunit_III	0	1.46e-06	5.11e-06	0	2.39e-05	0	0	5.75e-06	0	6.26e-06	0	0	3.79e-06	1.63e-05	0	0	0	0	0	0	0	8.71e-06	0	0	0	3.9e-06	0	0	1.35e-06	0	2.93e-06	3.23e-06	3.14e-06	0	1.05e-05	0	5.78e-06	0	0	0	0	0	0	0	7.75e-06	4.24e-06	1.72e-06	0
K00407_cb-type_cytochrome_c_oxidase_subunit_IV	0	0	0	0	0	0	0	0	0	0	0	0	0	0	0	0	0	0	0	0	0	0	0	0	0	0	0	0	0	0	0	4.2e-06	0	0	0	0	0	0	0	0	0	0	0	0	0	0	0	0
K00411_ubiquinol-cytochrome_c_reductase_iron-sulfur_subunit	0	2.2e-06	1.67e-05	0	1.38e-05	0	0	0	0	1.09e-05	2.1e-05	0	3.29e-05	0	0	0	1.86e-05	0	0	0	2.77e-05	0	0	0	0	0	0	0	4.48e-06	3.59e-05	1.99e-05	1.5e-05	2.18e-05	0	4.56e-05	9.94e-06	0	1.11e-05	1.29e-05	0	4.75e-05	0	0	0	0	7.42e-06	2.99e-06	1.25e-05
K00412_ubiquinol-cytochrome_c_reductase_cytochrome_b_subunit	4.1e-05	7.33e-06	1.45e-05	3.36e-05	7.22e-05	1.05e-05	1.07e-05	3.69e-05	2.59e-05	2.65e-05	1.69e-05	2.63e-05	4.49e-05	0	4.23e-05	4.76e-05	2.79e-05	1.4e-05	1.34e-05	9.69e-06	6.28e-05	3.59e-05	3.22e-05	2.9e-05	1.87e-05	1.38e-05	5.15e-06	7.62e-05	1.31e-05	4.43e-05	2.22e-05	1.95e-05	3.3e-05	1e-05	9.9e-05	1.77e-05	5.29e-05	1.61e-05	1.61e-05	0	0.000153541	5.38e-06	7.32e-06	5.49e-06	2.43e-05	1.83e-05	3.87e-05	5.07e-05
K00413_ubiquinol-cytochrome_c_reductase_cytochrome_c1_subunit	0	1.71e-06	0	0	6.15e-06	0	0	1.32e-05	0	0	1.23e-05	0	3.08e-06	0	0	0	5.99e-08	5.35e-07	0	7.26e-07	0	0	0	1.64e-06	0	0	0	1.82e-05	1.85e-06	0	1.63e-06	3.05e-06	2.55e-06	1.31e-07	8.28e-06	3.3e-07	0	0	0	0	0	0	0	0	0	0	0	0
K00416_ubiquinol-cytochrome_c_reductase_subunit_6	0	0	0	0	0	0	0	0	0	0	0	0	0	0	3.62e-05	0	0	0	0	0	0	0	0	0	0	0	0	0	0	0	0	0	0	0	0	0	0	0	0	0	0	0	0	0	0	0	5.38e-06	0
K00417_ubiquinol-cytochrome_c_reductase_subunit_7	0	0	0	1.41e-05	0	0	0	0	0	0	0	0	0	0	0	0	0	0	0	0	0	0	0	0	0	0	0	0	0	0	0	0	0	0	0	0	0	0	0	0	0	0	0	0	0	0	0	0
K00421	0	0	0	0	0	0	0	0	0	0	0	0	0	0	0	0	0	0	0	0	0	0	0	0	0	0	0	0	0	0	0	3.53e-07	0	0	0	0	0	0	0	0	0	0	0	0	0	0	0	0
K00423_L-ascorbate_oxidase	0	0	0	0	0	0	0	0	0	0	0	0	0	0	0	0	3.89e-06	0	0	0	0	0	0	0	0	0	0	0	7.14e-07	0	0	0	0	0	5.7e-07	0	0	0	0	0	0	0	0	0	0	0	0	0
K00425_cytochrome_bd-I_oxidase_subunit_I	0.000334181	0.000127587	0.00023824	8.93e-05	0.000332922	0.000187971	0.00025518	0.000244453	0.000254385	0.000343357	0.000294199	0.000404678	0.000869164	0.000332267	0.000538519	0.000224673	0.000601753	0.000227678	0.000459625	0.000312111	0.000461996	0.000177974	0.000260122	0.000441216	0.000232852	0.000498184	0.000728016	0.000417206	0.000533433	0.000276439	0.000207385	0.000309125	0.000224331	0.00038978	0.000170948	0.000515206	0.00040528	0.000235026	0.000669532	0.000295492	0.000344743	0.00024664	0.000134876	0.000308474	0.000367758	0.000213087	0.000360652	0.000211573
K00426_cytochrome_bd-I_oxidase_subunit_II	0.000263072	6.21e-05	0.000168445	2.38e-05	0.000164583	0.00010761	0.000236833	0.000118533	0.000124076	0.00014393	0.000119777	0.000251132	0.000480833	0.00018314	0.000292821	0.000114197	0.000424254	0.000114253	0.000323173	0.00026326	0.000200587	0.000100257	0.000154554	0.000264032	8.75e-05	0.000258171	0.000387229	0.000247246	0.00030829	0.000126666	0.000137078	0.000177601	9.83e-05	0.000190254	8.43e-05	0.000228767	0.000239876	0.000219291	0.000332158	0.000153042	0.000167942	0.00012839	3.15e-05	0.000197207	0.000265993	0.000156008	0.000189194	0.000118527
K00427_L-lactate_permease	0	7.22e-07	5.01e-07	0	4.28e-06	5.81e-07	0	3.31e-07	0	0	0	0	2.45e-07	0	0	0	0	0	6.74e-06	0	0	0	0	0	0	1.93e-06	0	0	1.49e-06	0	3.81e-06	5.2e-07	0	0	1.26e-06	0	0	0	0	4.29e-06	4.03e-06	0	0	0	0	0	9.01e-07	3.77e-07
K00428_cytochrome_c_peroxidase	1.25e-05	9.53e-06	1.18e-05	6.64e-06	4.95e-06	0	1.24e-05	4.37e-05	1.22e-05	1.58e-05	0	6.19e-06	3.21e-06	0	9.83e-06	8.59e-06	9.61e-06	1.85e-05	5.14e-06	1.53e-05	1.18e-05	1.47e-05	1.73e-05	1.24e-05	1.4e-05	6.52e-06	4.01e-06	1.45e-05	4.75e-06	0	1.59e-05	9.52e-06	5.18e-06	2.04e-06	1.26e-05	4.49e-06	9.08e-06	0	6.46e-06	1.3e-05	3.36e-05	4.77e-06	0	4.91e-06	3.28e-06	0	3.84e-06	1.84e-05
K00430_peroxidase	0	0	0	0	0	0	0	0	0	0	0	0	0	0	0	0	0	0	0	0	0	0	0	0	0	0	0	0	6.29e-07	0	0	0	0	0	0	0	0	0	0	0	0	0	0	0	0	0	1.52e-06	0
K00431_thyroid_peroxidase	0	0	0	0	0	0	0	0	0	0	0	2.14e-06	0	0	0	0	0	0	0	0	0	0	0	0	0	0	0	0	0	0	0	0	0	0	0	0	0	0	0	0	0	0	0	0	0	0	5.61e-07	0
K00432_glutathione_peroxidase	0.000827155	0.000241738	0.00047957	0.00128726	0.000497055	0.000903964	0.000916873	0.0010766	0.000471308	0.000639153	0.000498612	0.000666356	0.0017395	0.000399964	0.00147261	0.000537854	0.000938644	0.000157364	0.000823212	0.000786287	0.000681582	0.000298917	0.000611122	0.000968802	0.000470106	0.00104697	0.00151862	0.000889755	0.00110596	0.000491622	0.000416316	0.000698981	0.00119939	0.000744421	0.000427097	0.000898851	0.000855602	0.000699607	0.00142271	0.000478471	0.000703427	0.00038624	0.000125256	0.000606545	0.00093175	0.000447565	0.000667913	0.000243328
K00433_chloride_peroxidase	0	0	0	0	0	0	0	0	0	0	0	0	0	0	0	1.62e-05	1.22e-05	0	0	1.54e-05	0	0	0	7.61e-06	0	0	0	0	1.51e-06	0	1.01e-06	1.26e-06	0	0	0	3.03e-06	0	0	0	0	0	0	0	7.07e-06	0	0	1.52e-06	1.47e-05
K00435_peroxiredoxin	0	9.08e-07	0	0	9.51e-06	0	0	0	0	0	0	0	0	0	0	0	0	0	0	2.92e-06	0	0	1.93e-05	0	0	0	0	0	0	0	2.89e-06	7.81e-07	0	0	1.58e-06	9.68e-08	4.64e-06	0	0	0	0	0	0	3.76e-06	0	0	0	0
K00436_hydrogen_dehydrogenase	0	0	0	0	0	0	0	0	0	0	0	0	2.23e-06	0	0	0	0	0	0	0	1.09e-07	0	0	0	0	0	0	0	0	0	0	0	1.85e-06	0	0	0	0	0	0	0	0	0	0	0	0	0	0	0
K00437_cytochrome-c3_hydrogenase	1.28e-05	6.38e-06	1.78e-05	1.37e-05	6.91e-06	1.08e-05	6.44e-06	2e-05	6.41e-06	5.49e-06	2.1e-05	1.92e-05	9.89e-06	2.74e-05	2.02e-05	0	2.47e-05	5.9e-06	1.07e-05	0	0	0	0	7.36e-06	3.85e-06	4.42e-05	0	4.69e-05	6.23e-06	0	1.69e-06	7.38e-06	1.91e-05	0	1.63e-05	1.64e-05	0	1.83e-05	2e-05	0	0	6.64e-06	1.8e-05	0	6.77e-06	3.72e-06	1.5e-06	0
K00440_coenzyme_F420_hydrogenase_alpha_subunit	0	0	0	0	0	0	0	0	0	0	0	0	0	0	0	0	0	0	0	0	0	0	0	0	0	0	0	0	0	0	0	4.16e-07	0	0	0	0	0	0	0	0	0	0	0	0	0	0	0	0
K00441_coenzyme_F420_hydrogenase_beta_subunit	0	0	0	0	0	0	0	0	0	0	0	0	0	0	0	0	0	0	0	0	0	0	0	0	0	0	0	0	0	0	7.02e-07	0	0	0	8.48e-07	0	0	0	0	0	0	0	0	0	0	0	1.24e-06	5.27e-06
K00442_coenzyme_F420_hydrogenase_delta_subunit	0	0	0	0	0	0	0	0	0	0	0	1.36e-05	0	0	0	0	0	0	0	0	0	0	0	0	0	0	0	0	0	0	0	0	0	0	0	0	0	0	0	0	0	0	0	0	0	0	0	0
K00443_coenzyme_F420_hydrogenase_gamma_subunit	0	0	0	0	0	0	0	0	0	0	0	0	0	0	0	0	0	0	0	0	0	0	0	0	0	0	0	0	0	0	0	6.24e-07	0	0	0	0	0	0	0	0	0	0	0	0	0	0	0	0
K00444_wingless-type_MMTV_integration_site_family,_member_5	0	0	0	0	0	0	0	0	0	0	0	0	0	0	6.89e-06	0	0	0	0	0	0	0	4.41e-06	0	2.78e-06	0	0	0	0	0	0	0	0	0	0	0	0	0	0	0	0	0	0	0	0	0	0	0
K00445_wingless-type_MMTV_integration_site_family,_member_6	0	0	0	0	0	0	0	0	0	0	0	0	0	0	1.49e-05	0	0	0	0	0	0	0	0	0	0	0	0	0	0	0	0	0	0	0	0	0	0	0	0	0	0	0	0	0	0	0	0	0
K00446_catechol_2,3-dioxygenase	0	0	0	0	0	0	0	0	0	0	0	0	0	0	0	0	0	0	0	5.92e-06	0	0	0	0	0	0	0	0	1.3e-06	0	0	1.75e-06	2.84e-06	0	1.03e-06	0	0	0	0	0	0	0	0	7.1e-06	0	3.78e-06	1.39e-06	0
K00448_protocatechuate_3,4-dioxygenase,_alpha_subunit	0	0	0	0	0	0	0	0	0	0	0	0	0	0	0	0	0	0	0	0	0	0	0	0	0	0	0	0	0	0	0	0	0	0	0	0	0	0	0	0	0	0	0	0	0	0	2.43e-06	0
K00449_protocatechuate_3,4-dioxygenase,_beta_subunit	0	1.75e-06	0	0	0	0	0	0	0	0	0	0	0	1.23e-05	0	0	0	0	0	0	9.69e-06	0	0	0	0	0	0	0	1.71e-06	0	1.16e-06	2.32e-06	0	2.68e-06	2.79e-06	0	0	7.77e-06	0	8.52e-06	0	0	0	0	0	0	0	0
K00450_gentisate_1,2-dioxygenase	0	2.79e-06	0	0	0	0	0	0	0	0	0	0	0	0	0	0	4.71e-06	0	0	0	1.52e-05	0	0	0	0	0	2.31e-06	0	0	0	8.13e-07	1.24e-06	2.5e-06	0	5.55e-06	0	0	0	0	8.27e-06	0	0	0	0	0	0	2.64e-06	0
K00451_homogentisate_1,2-dioxygenase	0	1.06e-06	3.25e-06	0	0	1.81e-06	4.75e-06	0	0	0	7.7e-06	0	0	0	8.67e-06	0	7.74e-06	4.9e-06	0	0	0	0	0	1.74e-05	0	0	0	3.78e-05	2.04e-06	6.78e-06	2.04e-06	4.38e-07	0	1.54e-06	2.45e-06	2.25e-06	0	5.02e-06	2.75e-05	5.81e-06	0	0	0	0	0	0	0	0
K00452_3-hydroxyanthranilate_3,4-dioxygenase	0	0	0	0	0	0	0	0	0	0	0	0	0	0	0	0	0	0	0	0	0	0	0	0	0	0	0	0	0	0	0	1e-06	0	0	0	0	0	0	0	0	0	0	0	0	0	0	0	0
K00453_tryptophan_2,3-dioxygenase	0	1.31e-06	0	0	0	0	0	0	0	0	0	0	0	0	0	0	0	0	0	0	7.78e-06	0	0	7.91e-06	8.81e-06	0	0	0	3.74e-06	0	1.76e-06	1.26e-06	0	0	1.18e-06	0	0	0	0	0	0	0	0	0	0	0	1.23e-06	0
K00454_lipoxygenase	0	0	0	0	0	0	0	0	0	0	0	0	0	0	0	0	0	0	0	0	0	0	2.34e-06	0	1.36e-06	0	0	0	0	0	0	0	0	0	0	0	0	0	0	0	0	0	0	0	0	0	0	0
K00455_3,4-dihydroxyphenylacetate_2,3-dioxygenase	0	0	0	0	0	0	0	0	0	0	0	0	0	0	0	0	0	0	0	0	0	0	0	0	0	0	0	0	0	0	5.83e-06	1.32e-06	0	0	0	0	0	0	0	0	0	7.47e-06	0	0	0	0	1.71e-06	0
K00457_4-hydroxyphenylpyruvate_dioxygenase	5.73e-06	0	0	0	0	0	5.35e-06	0	0	0	0	0	0	7.69e-06	0	0	1.73e-05	0	0	0	0	1.09e-05	3.39e-06	6.11e-06	0	0	0	0	3.27e-06	0	1.48e-06	1.13e-06	0	1.77e-06	3.29e-06	4.49e-06	4.56e-06	1.05e-05	1.18e-05	0	0	0	8.29e-06	5.69e-06	0	0	2.04e-06	5.67e-06
K00458_arachidonate_12-lipoxygenase	0	0	0	0	0	0	0	0	0	0	0	0	0	0	0	0	0	0	0	0	0	0	0	0	0	0	0	0	0	0	0	0	0	0	0	0	0	0	0	0	0	0	0	0	0	0	1.09e-06	0
K00459_2-nitropropane_dioxygenase	1.18e-05	4.86e-06	7.21e-06	6.28e-06	6.33e-05	5.96e-06	0	9.17e-06	1.8e-05	2.02e-05	0	5.85e-06	4.22e-05	0	2.79e-05	1.1e-05	9.16e-06	5.42e-06	2.47e-05	0	1.91e-05	3.5e-05	1.2e-05	0	1.78e-05	3.11e-06	5.85e-06	0	5.73e-06	2.5e-05	1.08e-05	9.56e-06	4.25e-05	9.78e-06	6.25e-05	7.52e-06	0	5.64e-06	0	0	5.39e-05	6.09e-06	8.36e-06	0	9.29e-06	1.36e-05	1.52e-05	4.05e-05
K00460_arachidonate_15-lipoxygenase	0	0	0	0	0	0	0	0	0	0	0	0	0	0	0	0	0	0	0	3.22e-06	0	0	0	0	0	0	0	0	0	0	0	0	0	0	0	0	0	0	0	0	0	0	0	0	0	0	2.63e-07	0
K00461_arachidonate_5-lipoxygenase	0	0	0	0	0	0	0	0	0	0	0	0	0	0	0	0	0	0	0	0	0	0	0	0	0	0	0	0	0	0	0	0	0	0	0	0	0	0	0	0	0	0	0	0	0	0	6.47e-07	0
K00462_biphenyl-2,3-diol_1,2-dioxygenase	0	0	0	0	0	0	0	4.6e-06	0	0	0	0	0	0	0	0	0	0	0	0	0	0	0	0	0	0	0	0	0	0	0	0	0	0	0	0	0	0	0	0	0	0	0	0	0	0	0	0
K00463_indoleamine_2,3-dioxygenase	0	0	0	0	0	0	0	0	0	0	0	0	0	0	0	0	0	0	0	5.25e-06	0	0	0	0	0	0	0	0	0	0	0	0	0	0	0	0	0	0	0	0	0	0	0	0	0	0	0	0
K00464_lignostilbene-alpha,beta-dioxygenase	0	0	0	0	0	0	0	0	0	0	0	0	0	0	0	0	0	0	0	0	0	0	0	0	0	0	0	0	0	0	5.63e-07	7.68e-07	1.86e-06	0	6.83e-07	0	0	4.19e-06	0	0	0	0	0	0	0	0	0	0
K00466_tryptophan_2-monooxygenase	0	0	0	0	0	0	0	0	0	0	0	0	0	0	0	0	2.91e-06	0	0	0	0	0	0	0	0	0	0	0	0	0	0	0	0	0	0	0	0	0	0	0	0	0	0	0	0	0	0	0
K00467_lactate_2-monooxygenase	0	0	0	0	0	0	0	0	0	0	0	0	0	3.53e-06	0	0	0	0	0	0	0	0	0	0	0	0	0	0	0	0	0	0	0	0	0	0	0	0	0	0	0	0	0	0	0	0	0	0
K00469_inositol_oxygenase	0	0	0	0	0	0	0	0	0	0	0	0	0	0	0	0	0	0	0	0	0	0	0	0	0	0	0	0	0	0	0	0	0	0	0	0	0	0	0	8.8e-06	0	0	0	0	0	0	0	7.33e-06
K00470	0	0	0	0	4.51e-06	0	0	0	0	0	0	4.17e-06	0	0	0	0	0	0	0	0	3.1e-06	0	0	0	0	0	0	0	0	0	2.53e-06	2.53e-07	0	0	0	0	0	0	0	8.31e-06	0	3.81e-06	0	0	0	0	8.6e-07	0
K00472_prolyl_4-hydroxylase	0	0	0	0	0	0	0	0	0	0	0	0	0	0	1.09e-05	0	0	0	0	0	0	0	0	0	0	0	0	0	1.44e-06	9.64e-06	0	0	0	0	0	0	0	0	0	0	7.03e-06	0	0	0	0	0	0	0
K00473_procollagen-lysine,2-oxoglutarate_5-dioxygenase	0	0	0	0	0	0	0	0	0	0	0	0	0	0	0	0	6.43e-07	0	0	0	0	0	0	0	0	0	0	0	0	0	0	0	0	0	0	0	0	0	0	0	0	0	0	0	0	0	6.83e-07	0
K00474_trimethyllysine_dioxygenase	0	0	0	0	0	0	0	0	0	0	0	0	0	0	7.73e-06	0	0	0	0	0	0	0	0	0	0	0	0	0	0	0	0	0	0	0	0	0	0	0	0	0	0	5.5e-06	0	0	0	0	0	0
K00476_aspartate_beta-hydroxylase	0	0	0	0	0	0	0	2.53e-06	0	0	0	0	0	0	0	0	0	0	0	0	5.22e-06	0	5.32e-06	0	0	0	0	0	0	0	0	0	0	0	0	0	0	0	0	0	0	0	0	0	0	0	0	0
K00479_Rieske_2Fe-2S_family_protein	0	1.03e-06	0	0	0	0	0	0	0	0	0	0	0	0	0	9.83e-06	8.29e-06	5.22e-06	0	0	5.75e-06	0	0	0	3.06e-06	0	0	1.25e-05	0	0	1.38e-06	9.2e-07	0	0	0	0	0	4.94e-06	5.78e-06	0	0	0	0	0	0	0	0	0
K00480_salicylate_hydroxylase	0	0	0	0	0	0	0	0	0	0	0	0	0	0	0	0	0	0	0	0	0	0	0	0	0	0	0	0	0	0	7.03e-07	1.37e-06	0	0	1.66e-06	2.38e-06	0	0	5.78e-06	0	0	0	0	0	0	0	0	0
K00481_p-hydroxybenzoate_3-monooxygenase	0	0	0	0	0	0	5.42e-06	0	0	0	0	0	0	0	0	0	8.42e-06	0	4.56e-06	0	0	6.76e-06	0	7.26e-06	0	0	0	0	0	7.73e-06	0	2.89e-06	0	0	8.7e-07	4.57e-06	0	0	0	0	0	5.59e-06	7.68e-06	0	0	0	0	5.42e-06
K00483_4-hydroxyphenylacetate-3-hydroxylase_large_chain	0	7.3e-06	5.65e-06	1.74e-05	8.78e-06	1.65e-05	0	1.91e-05	8.15e-06	6.98e-06	6.68e-06	1.63e-05	6.29e-06	1.74e-05	6.43e-06	7.56e-06	9.43e-06	3.75e-06	6.83e-06	4.06e-06	1.33e-05	2.41e-05	8.25e-06	1.4e-05	2.2e-05	1.51e-05	1.07e-05	1e-05	3.96e-06	0	7.75e-06	2.42e-05	2.26e-05	2.13e-05	2.52e-05	1.91e-05	1.93e-05	4.27e-05	2.55e-05	0	7.61e-06	8.44e-06	5.73e-06	4.35e-06	2.58e-05	1.18e-05	2.86e-05	8.3e-06
K00484_4-hydroxyphenylacetate-3-hydroxylase_small_chain	0	0	0	0	0	0	0	0	0	0	0	0	0	0	0	0	0	0	0	0	0	0	0	0	0	0	0	0	0	0	4.95e-06	5.8e-07	0	0	0	0	0	0	0	1.48e-05	0	0	0	0	0	0	2.93e-06	0
K00485_dimethylaniline_monooxygenase_(N-oxide_forming)	0	2.23e-08	0	4.15e-06	0	0	0	5.56e-06	0	0	0	0	0	0	7.21e-06	0	0	0	0	0	0	0	0	0	0	0	0	0	0	0	6.18e-07	0	0	0	0	0	0	0	0	0	0	0	0	0	0	6.51e-08	6.68e-06	0
K00486_kynurenine_3-monooxygenase	0	9.28e-07	0	0	0	0	0	0	0	0	0	0	0	0	0	0	0	0	0	0	5.25e-06	0	4.43e-06	0	0	0	0	1.27e-05	0	0	0	0	0	0	6.84e-07	0	0	0	0	0	0	0	0	0	0	0	0	0
K00488_cytochrome_P450,_family_27,_subfamily_A_(cholestanetriol	0	0	0	0	0	0	0	0	0	0	0	0	0	0	0	0	0	0	0	0	0	0	0	0	0	0	0	0	0	0	0	0	0	0	6.39e-07	0	0	0	0	0	0	0	0	0	0	0	0	0
K00489_cytochrome_P450,_family_7,_subfamily_A_(cholesterol	0	0	0	0	0	0	0	0	0	0	0	4.2e-06	0	0	0	0	0	0	3.55e-06	0	0	0	0	0	0	0	0	0	0	0	0	0	0	0	0	0	0	0	0	0	0	4.39e-06	0	0	0	0	0	0
K00490_cytochrome_P450,_family_4,_subfamily_F_(leukotriene-B4	0	0	0	0	0	0	0	0	0	0	0	0	0	0	0	7.52e-06	0	0	0	0	0	0	0	0	4.89e-06	0	0	0	0	0	0	3.61e-07	0	0	0	0	0	0	0	0	0	0	0	0	0	0	1.9e-06	0
K00492	0	9.44e-07	2.36e-06	0	0	0	8.81e-07	1.04e-06	2.43e-07	0	0	1.36e-06	0	1.21e-06	1.34e-06	4.74e-06	1.04e-06	0	3.5e-06	4.74e-06	4.7e-06	5.75e-07	0	2.52e-07	2.88e-06	0	7.7e-07	0	1.68e-06	0	7.24e-07	2.82e-06	0	1.43e-06	1.35e-06	4.47e-06	2.69e-06	3.5e-06	4.09e-06	7.07e-06	0	0	0	0	1.89e-07	0	1.64e-06	0
K00493_unspecific_monooxygenase	0	0	0	0	0	0	0	0	0	0	0	0	0	0	0	0	0	0	0	0	0	0	0	0	0	0	0	0	0	0	0	0	0	0	8.66e-07	0	0	0	0	0	0	0	0	0	0	0	0	0
K00494_alkanal_monooxygenase_(FMN-linked)	0	0	4.36e-06	0	0	0	0	0	0	0	0	0	0	0	0	0	7.33e-06	0	5.34e-06	0	0	7.52e-06	0	0	0	0	4.14e-06	0	2.48e-06	0	1.65e-06	3.9e-06	0	0	0	2.69e-06	0	6.01e-06	1.33e-05	7.46e-06	1.18e-05	0	0	0	0	0	0	6.21e-06
K00495	0	0	0	0	0	0	0	0	0	0	0	0	0	0	0	0	2.38e-06	0	0	0	0	0	0	0	0	0	0	0	0	0	0	0	0	0	0	0	0	0	0	0	0	0	0	0	0	0	0	0
K00496_alkane_1-monooxygenase	0	0	0	0	0	0	0	0	0	0	0	0	0	0	0	0	0	0	0	0	5.94e-06	0	0	0	0	0	0	0	0	0	0	2.85e-06	0	0	0	0	0	0	0	0	0	0	0	0	0	0	0	0
K00497_cytochrome_P450,_family_11,_subfamily_B1_(steroid	0	0	0	0	0	0	0	0	0	0	0	2.89e-06	0	0	0	0	0	0	0	0	0	0	0	0	0	0	0	0	0	0	0	0	0	0	0	0	0	0	0	0	0	0	0	0	0	0	0	0
K00498_cytochrome_P450,_family_11,_subfamily_A_(cholesterol_monooxygenase	0	0	0	0	0	0	0	0	0	0	0	0	0	0	0	0	0	0	0	4.09e-06	0	0	0	0	0	0	0	0	0	0	0	0	0	0	0	0	0	0	0	0	0	0	0	0	0	0	9.61e-07	0
K00499_choline_monooxygenase	0	0	0	0	0	0	0	0	0	0	0	0	0	0	0	0	0	0	0	0	0	0	0	0	0	0	0	0	0	0	0	5.1e-07	0	0	9.01e-07	0	0	0	0	0	0	0	0	0	0	0	0	0
K00500_phenylalanine-4-hydroxylase	0	0	0	0	0	0	0	0	0	0	0	0	0	0	0	0	0	0	0	0	0	0	0	0	0	0	0	0	1.42e-06	0	0	1.89e-06	0	0	0	0	0	0	0	0	0	0	0	0	0	0	0	0
K00502_tryptophan_5-monooxygenase	0	0	0	0	0	0	0	0	0	0	0	4.29e-06	0	0	0	0	0	0	0	0	0	0	0	0	0	0	0	0	0	0	0	0	0	0	3.83e-07	0	0	0	0	0	0	0	0	0	0	0	1.48e-06	0
K00504_peptidylglycine_monooxygenase	0	0	0	0	0	0	0	1.49e-06	0	0	0	0	0	0	0	0	0	0	0	0	0	0	0	0	0	0	0	0	0	0	0	0	0	0	0	0	0	0	0	0	0	0	0	2.13e-06	0	0	0	0
K00505_tyrosinase	0	0	0	0	0	0	0	0	0	0	0	0	0	0	0	0	3.11e-06	0	0	0	0	0	0	0	0	0	0	0	0	0	0	0	0	0	0	2.28e-06	0	0	0	0	0	0	0	0	0	0	0	0
K00506_tyrosinase-related_protein_1	0	0	0	0	0	0	0	0	0	0	0	0	0	0	0	0	0	0	0	0	0	0	0	0	0	0	0	0	0	0	0	0	0	0	0	0	0	0	0	0	0	0	0	0	0	0	9.3e-07	0
K00507_stearoyl-CoA_desaturase_(delta-9_desaturase)	0	0	0	0	0	0	1.9e-05	0	0	0	1.06e-05	0	0	0	0	0	1e-05	0	0	0	7.24e-06	1.54e-05	0	0	0	7.35e-06	0	0	7.92e-06	0	3.6e-06	6.17e-06	6.04e-06	0	1.06e-06	1.91e-06	0	0	6.84e-06	0	0	0	0	0	3.54e-06	0	2.77e-06	0
K00508_linoleoyl-CoA_desaturase	0	0	0	0	0	1.89e-06	5.1e-06	0	0	0	0	5.85e-06	0	0	0	0	1.2e-05	0	0	4.95e-06	5.68e-06	0	5.46e-06	0	3.36e-06	0	0	0	2.23e-06	0	2.11e-06	3.59e-06	0	0	0	2.27e-06	4.22e-06	0	5.75e-06	0	0	0	0	0	0	0	1.25e-06	0
K00510_heme_oxygenase	0	0	0	0	0	0	0	0	0	0	0	0	0	0	0	0	0	0	0	0	0	0	0	0	4.06e-06	0	0	0	0	0	0	0	0	0	1.42e-06	3.8e-06	0	0	0	0	0	0	1.27e-05	0	0	0	0	0
K00511_squalene_monooxygenase	0	0	0	0	0	0	0	0	0	0	0	0	0	0	0	8.04e-06	0	0	0	0	0	0	0	0	0	0	0	0	0	0	0	0	0	0	0	0	0	0	0	0	0	0	0	0	0	0	0	0
K00513_cytochrome_P450,_family_21,_subfamily_A_(steroid_21-monooxygenase)	0	0	0	0	0	0	0	0	0	0	0	0	0	0	0	0	0	0	0	0	0	0	0	4.95e-06	0	0	0	0	0	0	0	0	0	0	0	0	0	0	0	0	0	0	0	0	0	0	0	0
K00514_zeta-carotene_desaturase	0	0	0	4.6e-06	0	0	4.42e-06	0	0	0	0	0	0	0	0	0	0	0	0	0	4.76e-06	0	0	5.06e-06	0	2.18e-06	1.22e-06	0	0	0	5.79e-07	0	0	1.44e-06	0	0	0	0	0	0	0	0	0	0	0	0	0	0
K00517	0	0	0	0	1.54e-06	1.35e-06	0	9.26e-07	0	0	0	1.42e-06	0	0	0	0	7.1e-06	0	4.21e-06	0	1.4e-05	0	5.23e-06	5.42e-06	0	0	0	1.29e-05	8.09e-07	0	5.48e-06	7.88e-07	4.27e-06	0	0	6.63e-06	8.12e-06	0	0	1.05e-05	0	1.97e-06	0	0	0	0	1.68e-06	0
K00518_superoxide_dismutase	0	0	0	0	0	0	0	0	0	0	2.54e-05	0	0	0	0	0	1.24e-05	0	7.25e-06	0	0	0	0	0	0	8.37e-06	0	0	1.29e-07	0	2.41e-07	0	6.84e-06	0	2.5e-06	6.58e-06	0	0	0	0	0	0	2.22e-05	0	0	0	0	1.57e-05
K00520_mercuric_reductase	0	0	0	0	0	0	0	0	0	0	0	0	0	0	0	0	0	0	0	0	0	0	4.69e-06	4.75e-06	0	0	0	0	0	0	0	0	0	0	0	1.9e-06	0	0	0	0	0	0	0	0	0	0	0	0
K00522_ferroxidase	0	0	6.36e-06	0	0	0	0	6.33e-06	0	0	0	8.97e-06	0	0	0	0	0	0	0	0	0	0	8.88e-06	1.03e-05	0	0	0	0	0	0	0	0	0	0	1.01e-06	0	0	0	0	0	1.59e-05	0	0	0	0	0	0	0
K00523_CDP-4-dehydro-6-deoxyglucose_reductase	0	0	0	0	0	0	0	0	0	0	0	0	0	0	0	0	0	0	0	0	0	0	0	0	0	0	0	0	0	0	8.02e-07	1.61e-06	0	0	0	0	0	0	0	0	0	0	0	0	0	0	0	6.34e-06
K00524_ribonucleotide_reductase,_class_II	0	0	0	0	0	0	0	0	2.58e-06	0	0	0	0	0	0	0	0	0	0	0	0	0	0	0	0	0	7.98e-07	0	0	0	3.17e-07	0	0	0	0	0	0	1.74e-06	0	0	0	0	3.41e-06	0	0	0	0	0
K00525_ribonucleoside-diphosphate_reductase_alpha_chain	0.000638349	0.000392229	0.000455118	0.0014148	0.00077004	0.0012149	0.000681529	0.000992637	0.00135697	0.000725729	0.000745923	0.000637201	0.000928711	0.00137022	0.000632091	0.000325786	0.00039352	0.000367971	0.000411121	0.000528017	0.000804992	0.000562127	0.000941344	0.000704178	0.000533071	0.000860502	0.000911381	0.00084253	0.00088442	0.000500408	0.00117031	0.000760127	0.00073875	0.000729519	0.000890811	0.00110975	0.000641634	0.00051679	0.00059311	0.000748021	0.000483629	0.000835997	0.000475728	0.000345751	0.00109472	0.000961504	0.000555314	0.000423533
K00526_ribonucleoside-diphosphate_reductase_beta_chain	0.000241479	0.000369655	0.000271652	6.69e-05	0.000242792	0.000260001	0.000110666	0.000663204	0.000984237	0.000391576	0.000275581	0.000302671	0.000203562	7.09e-05	0.000136134	5.72e-05	6.1e-05	0.000252224	9.17e-05	0.000183927	0.000271991	0.000305532	0.000210889	5.85e-05	0.000313952	0.000365345	0.000259807	0.000307614	0.000402693	0.00035879	0.000173947	0.000430152	0.000309643	0.00045358	0.000456673	9.82e-05	0.000137395	0.000204498	6.33e-05	0.000248897	0.000251801	0.000226712	0.000369578	0.000182153	0.0002415	0.000663815	0.000123213	0.000237628
K00527_ribonucleoside-triphosphate_reductase	0.00597767	0.00367574	0.00577236	0.00635484	0.00651102	0.00555544	0.00625235	0.00467679	0.00637302	0.00379285	0.00597624	0.00431795	0.00279015	0.00685753	0.00681884	0.00713866	0.00807438	0.00565861	0.0058931	0.00598475	0.00672864	0.0056491	0.00716753	0.00679579	0.00483799	0.00447138	0.0035141	0.00657809	0.0042393	0.00766665	0.00663455	0.00376855	0.00427144	0.00401794	0.00458073	0.00528856	0.00506786	0.00611564	0.0039253	0.00803485	0.00695303	0.00646313	0.00445228	0.00497891	0.00423265	0.0042176	0.00591077	0.00565376
K00528_ferredoxin--NADP+_reductase	0.00173213	0.00187943	0.00161543	0.00123913	0.00174575	0.00157886	0.00153629	0.00171521	0.00191402	0.0016522	0.00157938	0.00159393	0.00108337	0.00148908	0.00107288	0.00111496	0.00118334	0.00197678	0.00126482	0.00145608	0.00151176	0.00170069	0.00146189	0.000916342	0.00185007	0.00144405	0.000959496	0.00132651	0.00153837	0.00201322	0.00146947	0.00167432	0.00128198	0.00156664	0.00159412	0.00124824	0.00111935	0.00150622	0.000806673	0.00140678	0.00145552	0.0014239	0.00213295	0.00143615	0.00159687	0.00212421	0.00142506	0.00185625
K00529_ferredoxin--NAD+_reductase	0	7.4e-08	0	0	0	0	0	0	0	0	0	0	0	0	0	0	0	0	8.65e-06	0	5.65e-06	0	0	0	0	0	1.3e-07	2.35e-07	1.01e-06	0	4.9e-06	2.32e-06	0	1.7e-06	8.22e-07	0	0	0	0	1.23e-05	0	5.4e-06	0	0	0	0	0	0
K00532_ferredoxin_hydrogenase	0	2.88e-06	0	9.81e-06	1.32e-05	4.13e-06	6.16e-06	2.39e-06	0	3.97e-06	5.03e-06	0	6.4e-07	0	7.32e-06	1.38e-05	1.46e-06	5.87e-06	0	3.06e-06	0	0	7.78e-06	1.41e-05	7.39e-06	0	0	0	6.96e-07	0	3.23e-06	0	0	0	4.87e-06	1.97e-06	2.43e-06	4.25e-06	0	3.62e-06	0	0	0	4.47e-06	2.36e-06	0	2.66e-06	0
K00533_ferredoxin_hydrogenase_large_subunit	3.51e-05	3.24e-05	2.44e-05	3.27e-05	2.84e-05	8.87e-06	3.53e-05	1.37e-05	8.79e-06	9.78e-05	5.77e-05	5.42e-05	9.5e-05	1.25e-05	3.09e-05	5.71e-05	1.02e-05	3.26e-05	9.92e-05	1.75e-05	1.43e-05	1.04e-05	1.33e-05	7.07e-05	8.44e-05	7.92e-06	3.33e-05	5.33e-05	2.76e-05	6.22e-05	2.71e-05	7.27e-05	0.000114363	4.3e-05	4.73e-05	1.1e-05	4.17e-05	4.76e-05	0.000151253	2.6e-05	0.000164405	4.55e-05	3.7e-05	0.000220725	0.000153122	1.78e-05	1.96e-05	2.61e-05
K00534_ferredoxin_hydrogenase_small_subunit	0	0	0	0	0	0	0	0	0	0	0	0	0	0	0	0	0	0	0	0	0	0	0	0	0	0	0	0	0	0	0	7.46e-08	0	0	3.55e-07	0	0	0	0	9.94e-07	0	0	0	0	0	0	0	0
K00535	0	0	0	0	0	0	0	0	0	0	0	0	0	0	0	0	0	0	0	0	0	0	0	0	0	0	0	0	0	0	0	0	7.3e-06	0	2.71e-06	0	0	0	0	0	0	0	0	0	0	0	0	0
K00537_arsenate_reductase	0	1.63e-05	4.48e-05	0	1.92e-05	0	0	0	0	1.38e-05	0	1.57e-05	0	0	0	0	0	1.49e-05	1.5e-05	1.6e-05	0	0	0	0	0	2.85e-05	1.12e-05	0	3.52e-06	0	1.65e-05	1.14e-05	7.59e-06	1.18e-05	0	1.55e-05	0	1.74e-05	1.87e-05	2.17e-05	6.02e-05	0	0	0	1.89e-05	1.07e-05	4.17e-06	4.66e-05
K00538_formate_acetyltransferase_activating_enzyme	0	3.73e-07	8.49e-07	0	0	0	3.29e-07	1.33e-06	1.6e-07	0	0	0	1.22e-07	0	2.94e-07	6.45e-07	1.24e-07	0	6.29e-07	0	8.3e-07	6.97e-07	0	0	2.3e-07	1.48e-06	3.15e-07	0	5.54e-07	0	7.01e-07	2.33e-07	3.26e-07	5.22e-07	2.41e-07	2.33e-07	1.34e-06	2.05e-07	1.12e-07	1.23e-07	0	3.96e-07	0	1.93e-07	7.27e-07	1.88e-07	9.12e-07	0
K00540	0.000396859	0.000578835	0.000299296	0.000125396	0.000338802	0.000241	0.000254687	0.000497396	0.000390461	0.000423311	0.000384679	0.00046174	0.000334372	0.000270982	0.000256687	0.000203392	0.000438808	0.000373138	0.000366608	0.000413702	0.000405503	0.000339267	0.00028421	0.000240624	0.000419305	0.000473494	0.000354638	0.000278361	0.000382559	0.000396098	0.000367792	0.000419603	0.000357351	0.000469833	0.000385425	0.00031139	0.000288013	0.000327178	0.000167006	0.000511037	0.000252103	0.000329342	0.000488625	0.000315363	0.000295273	0.000462114	0.000220936	0.00042507
K00541_nicotinamide_N-methyltransferase	0	0	0	0	0	0	0	0	0	0	0	0	0	0	1.28e-05	0	0	0	0	0	0	0	0	0	0	0	0	0	0	0	0	0	3.43e-06	0	0	0	0	0	0	0	0	0	0	0	0	0	0	0
K00544_betaine-homocysteine_S-methyltransferase	0	0	0	0	0	0	0	0	0	0	0	0	0	0	0	0	0	0	0	0	0	0	0	0	0	0	0	0	0	0	0	0	0	0	0	0	0	0	0	0	0	0	0	0	0	0	1.42e-06	0
K00546_histamine_N-methyltransferase	0	0	0	0	0	0	0	0	0	0	0	0	0	0	0	0	0	0	0	0	0	0	0	0	0	0	0	0	0	0	0	0	0	0	0	0	0	0	0	0	0	0	0	0	0	0	1.7e-06	0
K00547_homocysteine_S-methyltransferase	3.59e-06	8.83e-06	1.48e-05	3.82e-06	0	5.9e-06	3.6e-06	1.37e-05	0	9.22e-06	0	7.16e-06	1.66e-05	0	5.66e-06	6.66e-06	8.17e-06	9.65e-06	8.99e-06	1.37e-05	1.89e-05	0	0	8.09e-06	1.67e-05	0	5.83e-06	1.75e-05	3.49e-06	4.88e-06	4.07e-06	1.72e-05	6.12e-06	9.23e-06	2.09e-05	0	1.62e-05	2.01e-05	1.12e-05	8.33e-06	6.7e-06	6.49e-06	0	3.83e-06	2.44e-05	0	4.91e-06	2.02e-05
K00548_5-methyltetrahydrofolate--homocysteine_methyltransferase	0.000157062	9.23e-05	0.000156873	0.000247917	0.000133111	0.000168827	0.000147163	0.000218086	0.00013365	0.000172684	0.000134505	0.000159635	0.000269164	0.000126506	0.00024665	0.000114504	0.000214775	0.000129033	0.000212791	0.000133114	0.000191549	0.000161939	0.000171693	0.000196674	0.000152283	0.000206026	0.000229894	0.000242086	0.000190554	0.000120586	0.000125731	0.000164152	0.000184075	0.000119435	0.00018134	0.000262442	0.000206286	0.000201647	0.000295678	0.000166747	0.000153357	0.000140945	0.00012385	0.000208174	0.000186912	0.000119593	0.000159541	0.000121414
K00549_5-methyltetrahydropteroyltriglutamate--homocysteine	0.000263855	0.000695641	0.000321791	0.000146854	0.000290219	0.000307558	0.000171524	0.000506281	0.000432377	0.000545173	0.000326737	0.000461436	0.000285804	0.000115625	0.000194709	0.000141062	0.00011705	0.000447099	0.000145016	0.000316671	0.000373643	0.000317751	0.000243385	0.00018393	0.000535556	0.000368954	0.000283285	0.000307984	0.000416036	0.000430845	0.000216077	0.000527841	0.000361394	0.000536604	0.000477851	0.0001233	0.000238147	0.000278743	0.000234857	0.000357187	0.000273451	0.000297002	0.000567199	0.000254551	0.000411582	0.000721415	0.000174328	0.000449023
K00551_phosphatidylethanolamine_N-methyltransferase	0	0	0	0	0	0	0	0	0	0	0	0	0	0	0	0	0	0	0	0	0	0	0	0	0	0	0	0	0	0	0	0	0	0	0	0	0	2.18e-06	0	0	0	0	0	0	0	0	0	0
K00552_glycine_N-methyltransferase	0	0	0	0	0	0	0	0	0	0	0	0	0	0	1.09e-05	0	0	0	0	0	0	0	4.31e-06	0	0	0	0	0	0	0	0	0	0	0	0	0	0	0	0	0	0	0	0	0	0	0	1.62e-06	0
K00554_tRNA_(guanine-N1-)-methyltransferase	0.00149428	0.00135347	0.00110442	0.00132264	0.00152461	0.00164279	0.00122225	0.00168969	0.00156464	0.00143922	0.00160277	0.00125625	0.00171333	0.00207089	0.00149514	0.000922973	0.000964344	0.00123048	0.00116198	0.0015018	0.00145652	0.00119609	0.00134159	0.00130601	0.00148743	0.00139297	0.00160492	0.00115858	0.00173646	0.00112163	0.0017762	0.00149056	0.00152728	0.00140657	0.00140195	0.00150013	0.00128724	0.00116239	0.0010902	0.00159843	0.000934407	0.00146475	0.00130219	0.000928721	0.00165782	0.00165139	0.00131826	0.00119344
K00555_tRNA_(guanine-N2-)-methyltransferase	0	0	0	0	0	0	0	0	0	0	0	0	0	0	0	0	0	0	0	0	0	0	0	0	0	0	0	0	0	0	6.65e-07	0	0	0	5.33e-07	0	0	0	0	0	0	0	0	0	0	0	0	0
K00556_tRNA_(guanosine-2'-O-)-methyltransferase	0	0	0	0	0	0	0	0	0	0	0	0	0	0	0	0	0	0	1.56e-05	0	0	0	0	0	0	0	0	0	0	0	3.67e-06	0	0	0	1.73e-06	3.93e-06	0	0	0	2.19e-05	0	9.48e-06	0	0	0	0	0	9.68e-06
K00557_tRNA_(uracil-5-)-methyltransferase	1.78e-06	1.61e-06	8.12e-06	0	1.89e-05	0	0	0	0	4.99e-06	9.5e-06	5.8e-06	0	0	0	0	6.23e-06	1.61e-05	4.82e-06	1.17e-05	0	0	5.85e-06	0	0	9.24e-06	3.82e-06	0	0	3.24e-05	1.68e-05	2.41e-06	0	1.72e-07	9.29e-07	0	1.39e-05	0	0	6.87e-06	1.06e-05	1.21e-05	0	6.26e-06	0	0	2.75e-06	6.91e-06
K00558_DNA_(cytosine-5-)-methyltransferase	0.00199799	0.00141688	0.00182971	0.00257485	0.0018416	0.00171668	0.00184624	0.00174895	0.00154166	0.00144458	0.00191808	0.00194135	0.000764358	0.003099	0.00182769	0.00305327	0.0019792	0.00266976	0.00225571	0.00177289	0.0020171	0.00250215	0.002221	0.00315081	0.00177847	0.00161966	0.000984153	0.00171628	0.00109167	0.00229671	0.00232117	0.00123394	0.00174822	0.00159244	0.00200384	0.00215718	0.0028744	0.00468434	0.00127031	0.00281108	0.00271915	0.00259545	0.00223267	0.00222523	0.00141398	0.00146844	0.00235238	0.00227062
K00559_sterol_24-C-methyltransferase	0	0	0	0	0	0	0	0	0	0	0	0	0	0	0	0	0	0	0	0	0	0	0	0	0	0	0	0	0	0	0	0	0	0	0	0	0	5.77e-06	0	0	0	0	0	0	0	0	0	0
K00560_thymidylate_synthase	0.00306684	0.00196907	0.00357189	0.00305745	0.00350779	0.00313908	0.00510734	0.00205498	0.00441724	0.00230985	0.00396063	0.0035181	0.0013913	0.00501941	0.00193371	0.00446872	0.00230464	0.00380256	0.00216636	0.0029823	0.00294712	0.00369001	0.00333597	0.00309531	0.00271294	0.00145744	0.0013417	0.00202536	0.00251681	0.00265922	0.00514126	0.00180367	0.00205503	0.00239056	0.00345236	0.00370317	0.00350181	0.00239546	0.00134895	0.00447079	0.00318866	0.0034347	0.00280871	0.0020883	0.00269299	0.00171512	0.00312377	0.00296036
K00562_amine_N-methyltransferase	0	0	0	0	0	0	0	0	0	0	0	0	0	0	0	0	0	0	0	0	0	0	0	0	0	0	0	0	0	0	0	0	0	0	0	0	0	0	0	0	0	0	0	0	0	0	1.9e-06	0
K00563_rRNA_(guanine-N1-)-methyltransferase	0	0	5.2e-06	0	0	0	0	0	0	0	0	7.69e-06	0	0	0	0	0	0	0	7.47e-06	0	9.57e-06	0	0	0	0	2.54e-06	0	0	0	2.07e-06	6.68e-07	0	0	0	0	0	0	0	9.37e-06	0	0	0	0	0	0	0	0
K00564_ribosomal_RNA_small_subunit_methyltransferase_C	0	0	7.52e-06	0	0	0	6.45e-06	0	0	0	0	0	0	0	0	0	4.4e-06	2e-05	1.04e-05	0	0	2.02e-05	0	7.45e-06	0	9.21e-06	0	0	0	2.44e-05	1.17e-05	2.57e-06	0	0	0	0	1.37e-05	0	0	1.47e-05	1.2e-05	6.35e-06	0	6.91e-06	0	0	0	2.14e-05
K00565_mRNA_(guanine-N7-)-methyltransferase	0	0	0	0	0	0	0	3.31e-06	0	0	0	0	0	0	0	0	0	0	0	0	0	0	0	0	0	0	0	0	7.38e-07	0	0	0	0	0	0	0	0	4.07e-06	0	0	0	0	0	0	0	0	0	0
K00566_tRNA_(5-methylaminomethyl-2-thiouridylate)-methyltransferase	0.0010401	0.000353413	0.000784497	0.00123572	0.000956717	0.0012076	0.000910525	0.00114886	0.000707379	0.000960449	0.000689983	0.000961717	0.00178136	0.00104415	0.00133079	0.000911292	0.00152888	0.000479527	0.00120557	0.000934004	0.000993781	0.000544833	0.000955792	0.00126905	0.000713819	0.0012551	0.00168354	0.00142694	0.00120186	0.000960658	0.000833967	0.000946365	0.00120184	0.000927881	0.000747922	0.00138294	0.00115314	0.00101672	0.00168776	0.000606552	0.000962901	0.000816573	0.000336682	0.00109249	0.00126287	0.000770155	0.000929702	0.000650179
K00567_methylated-DNA-[protein]-cysteine_S-methyltransferase	0.0005698	0.000372901	0.000446423	0.000602156	0.000456443	0.000445478	0.000509971	0.000121887	0.000447381	0.000462112	0.000492933	0.000349329	0.0001238	0.000500948	0.000573304	0.000763063	0.000523533	0.000785461	0.000646141	0.000338277	0.000540315	0.000841345	0.000559826	0.000625793	0.000505006	0.000314523	0.000151665	0.000298924	0.00017133	0.000430849	0.000456418	0.000249485	0.000309648	0.000298345	0.000409708	0.000556456	0.000627508	0.000771077	0.000393013	0.000498478	0.000680181	0.000587415	0.000593614	0.000567548	0.000231473	0.000238235	0.000651934	0.000716738
K00568_3-demethylubiquinone-9_3-methyltransferase	0	1.69e-06	0	0	0	0	0	0	0	0	0	0	0	0	0	0	0	0	0	0	1.79e-05	0	0	0	0	6.93e-06	3.05e-06	0	1.53e-06	0	1.15e-06	6.21e-06	0	0	2.14e-06	3.81e-06	0	0	1.36e-05	0	0	8.54e-06	1.19e-05	0	0	0	0	0
K00571_site-specific_DNA-methyltransferase_(adenine-specific)	0.000469369	0.000218218	0.000634367	0.000411214	0.000725542	0.00041227	0.00159523	0.000481283	0.000362404	0.00035447	0.00112011	0.000417862	0.000190776	0.000957565	0.000622573	0.000820022	0.00052882	0.000500002	0.000596066	0.000513258	0.000664618	0.000617827	0.00078766	0.000791299	0.000469114	0.000435232	0.000242516	0.000467589	0.000296409	0.000691779	0.000681103	0.000240781	0.000365188	0.000489296	0.000457589	0.000464708	0.000555572	0.00066836	0.000392587	0.000649177	0.000603299	0.000759099	0.000498858	0.000634005	0.000337512	0.000363505	0.000531736	0.000462118
K00572_wingless-type_MMTV_integration_site_family,_member_7	0	0	0	0	0	0	0	0	0	0	0	0	0	0	0	0	0	0	0	0	0	0	4.03e-06	0	0	0	0	0	0	0	0	0	0	0	0	0	0	0	0	0	0	0	0	0	0	0	0	0
K00573_protein-L-isoaspartate(D-aspartate)_O-methyltransferase	0	0	0	0	0	0	0	7.97e-06	0	0	0	0	0	0	0	0	0	0	8.58e-06	0	0	0	6.15e-06	0	5.99e-06	5.23e-06	0	0	0	0	6.66e-06	1.82e-06	0	0	2.19e-06	0	8.08e-06	0	0	0	0	0	0	0	0	0	0	0
K00574_cyclopropane-fatty-acyl-phospholipid_synthase	8.59e-05	0.000263223	7.92e-05	4.54e-05	7.24e-05	5.4e-05	2.1e-05	0.000136075	0.000129601	9.54e-05	8.98e-06	0.000118608	2.9e-05	4.55e-05	2.5e-05	2.94e-05	3.74e-05	0.000204132	4.59e-06	9.21e-05	5.06e-05	7.71e-05	3.25e-05	4.17e-05	7.01e-05	0.000114303	0.000146612	0.00015371	7.27e-05	0.000103865	4.43e-05	6.38e-05	0.000104629	5.88e-05	0.00018237	4.18e-05	2.6e-05	0.000116028	4.55e-05	9.01e-05	5.77e-05	2.67e-05	0.000129923	7.04e-05	6.15e-05	0.000189835	4.27e-05	0.000120882
K00575_chemotaxis_protein_methyltransferase_CheR	1.53e-05	3.7e-05	3.26e-05	1.56e-05	4.88e-05	3.87e-05	0	5.53e-05	7.66e-05	6.9e-06	5.19e-05	7.55e-06	4.16e-05	2.16e-05	8.36e-05	7.32e-05	4.15e-05	2.82e-05	3.33e-05	3.94e-05	3.32e-05	7.26e-05	5.45e-05	5.38e-05	4.31e-05	4.84e-05	3.82e-05	0.000152895	1.87e-05	3.43e-05	2.95e-05	3.79e-05	6.05e-05	2.81e-05	4.9e-05	7.18e-05	5.56e-05	7.81e-06	2.51e-05	2.68e-05	6.26e-05	3.21e-05	0.00012973	8.58e-05	7.18e-05	8.85e-06	3.09e-05	2.33e-05
K00577_tetrahydromethanopterin_S-methyltransferase_subunit_A	0	0	0	0	0	0	0	0	0	0	0	0	0	0	0	0	0	0	0	0	0	0	0	0	0	0	0	0	0	0	0	7.95e-07	0	0	0	0	0	0	0	0	0	0	0	0	0	0	0	0
K00584_tetrahydromethanopterin_S-methyltransferase_subunit_H	0	0	0	0	0	0	0	0	0	0	0	0	0	0	0	0	0	0	0	0	0	0	0	0	0	0	0	0	0	0	0	5.52e-07	0	0	0	0	0	0	0	0	0	0	0	0	0	0	0	0
K00586_diphthine_synthase	7.65e-06	0	0	0	0	0	0	0	0	0	0	0	0	0	0	0	0	0	0	0	0	0	0	0	0	0	0	0	0	0	0	0	0	0	0	0	0	0	0	0	0	0	0	0	0	0	0	0
K00590_site-specific_DNA-methyltransferase_(cytosine-N4-specific)	3.53e-05	7.58e-06	1.98e-05	3.43e-05	4.14e-05	5.96e-06	0.00015306	5.75e-06	4.14e-05	1.8e-05	5.86e-05	2.82e-06	7.57e-06	7.29e-05	3.95e-05	7.45e-06	2.11e-05	7.14e-05	2.8e-05	0.000110489	2.6e-05	1.39e-05	0.000188626	5.59e-05	1.98e-05	3.51e-05	6.29e-06	2.18e-05	6.92e-06	3.99e-06	6.59e-05	4.41e-06	1.09e-05	3.38e-05	1.81e-05	2.22e-05	5.05e-05	2.32e-05	0	3.35e-05	4.4e-05	7.4e-05	1.44e-05	5.52e-06	2.73e-06	1.71e-05	0.000235071	2.99e-05
K00591_hexaprenyldihydroxybenzoate_methyltransferase	0	0	1.99e-05	2.22e-05	0	0	1.05e-05	0.000105658	7.81e-06	0	0	0.000127226	5.36e-06	1.11e-05	0.000385316	1.61e-05	7.97e-05	1.92e-05	8.56e-05	3.9e-05	2.45e-05	1.13e-05	0.000120837	0.000118599	3.91e-05	0	1.72e-06	0	2.02e-06	1.84e-05	0	6.61e-06	0	0	1.02e-05	0	1.72e-05	4.96e-06	0	0	0.000102143	9.62e-05	0	0	6.87e-06	1.01e-06	0.000152246	0
K00595_precorrin-6Y_C5,15-methyltransferase_/_precorrin-8W_decarboxylase	5.39e-06	4.01e-06	7.5e-06	0	0	0	0	0	0	9.23e-06	0	3.11e-06	8.32e-06	0	0	5.79e-06	0	5.75e-06	5.22e-06	0	0	0	0	3.58e-06	1.87e-06	1.66e-06	3.83e-06	0	1.65e-06	0	1.07e-06	5.81e-06	2.66e-06	0	0	0	0	0	1.86e-05	3.69e-06	0	3.23e-06	0	2.15e-05	1.39e-05	0	1.21e-06	8.13e-06
K00598_trans-aconitate_2-methyltransferase	0	0	0	0	0	0	0	0	0	0	0	0	0	0	0	0	6.29e-06	0	0	0	0	0	0	0	0	0	0	0	0	0	3.34e-06	7.5e-07	0	0	9.23e-06	0	0	0	0	0	0	0	0	0	0	0	0	0
K00599	0.000738654	0.00120726	0.000623331	0.000480947	0.000663158	0.000714677	0.000968688	0.000848951	0.000718085	0.000961536	0.000900813	0.000823909	0.00089129	0.00052061	0.000590739	0.000505871	0.000423373	0.000738182	0.000542583	0.00062303	0.000697783	0.0007138	0.000624077	0.000462133	0.000868233	0.000937626	0.000812636	0.000648448	0.000926251	0.000981186	0.000495453	0.000971883	0.000690129	0.000968275	0.000853328	0.000427957	0.000470873	0.000485628	0.000793441	0.000824215	0.00062498	0.00056406	0.000926714	0.000829526	0.000864337	0.00102221	0.000638953	0.000812945
K00600_glycine_hydroxymethyltransferase	0.00244914	0.00128512	0.00246312	0.00332758	0.00290515	0.00240251	0.00342097	0.0016643	0.00226166	0.00168904	0.002834	0.00197266	0.00217536	0.00367087	0.00255766	0.00395024	0.00367444	0.00234518	0.0029964	0.00321439	0.00257284	0.00273118	0.00315234	0.00297734	0.0021717	0.00177527	0.00220416	0.00233377	0.00210822	0.00209952	0.0031489	0.00182098	0.00238691	0.00178914	0.00228512	0.00289254	0.00326387	0.00253529	0.0022357	0.00250779	0.00320018	0.00305455	0.00176191	0.00243254	0.00248218	0.00134593	0.0030757	0.0023865
K00602_phosphoribosylaminoimidazolecarboxamide_formyltransferase_/_IMP	0.00210474	0.00122271	0.0019004	0.00205336	0.00173268	0.00184253	0.00152623	0.00200597	0.00123947	0.00148914	0.0015906	0.00185487	0.00333519	0.0016419	0.00311063	0.00201998	0.00273902	0.0016834	0.00290164	0.00196787	0.0022763	0.00156963	0.00196107	0.00275398	0.0016964	0.00213961	0.00304606	0.00197561	0.00214332	0.00185293	0.00161007	0.00198313	0.0023033	0.00205362	0.00153809	0.00202891	0.00242996	0.00240455	0.00335974	0.00197677	0.00200245	0.00178239	0.00110466	0.0022661	0.00205592	0.00160306	0.00210789	0.00149945
K00603_glutamate_formiminotransferase	2.14e-05	1.28e-05	4.45e-05	2.28e-05	3.84e-05	1.92e-05	5.74e-05	1.11e-05	1.42e-05	1.83e-05	0	2.85e-05	1.1e-05	3.05e-05	1.13e-05	3.97e-05	1.66e-05	0	5.97e-05	1.42e-05	4.64e-05	2.53e-05	2.88e-05	8.2e-06	1.29e-05	2.27e-05	1.88e-05	3.47e-05	1.94e-05	1.01e-05	3.74e-05	1.51e-05	1.52e-05	1.16e-05	3.4e-05	4.24e-05	3.39e-05	8.16e-05	1.49e-05	5.03e-05	1.33e-05	6.59e-05	3.01e-05	1.52e-05	1.13e-05	1.66e-05	5.18e-05	4.23e-05
K00604_methionyl-tRNA_formyltransferase	0.000898854	0.000580859	0.00087845	0.000857831	0.000908799	0.000865557	0.00127949	0.000799108	0.00101962	0.000671086	0.000806746	0.000610271	0.000744384	0.0010726	0.000583754	0.00107088	0.000700967	0.000795737	0.000885734	0.000800924	0.000628783	0.000860278	0.000976256	0.000844321	0.000591656	0.000638383	0.000670437	0.000757466	0.000882322	0.00061113	0.000978713	0.000683472	0.00071619	0.00075557	0.000820236	0.000994348	0.00088795	0.000584951	0.000596434	0.000826969	0.000661606	0.000811036	0.00059722	0.000653246	0.000863377	0.00058846	0.00074477	0.000702228
K00605_aminomethyltransferase	5.25e-05	3.61e-05	5.73e-05	0.000259841	0.00012676	0.000196659	6.51e-05	5.01e-05	9.35e-05	6.02e-05	7.69e-05	4.1e-05	6.89e-05	0.000285523	9.28e-05	9.86e-05	5.93e-05	0.000113991	9.36e-05	9.43e-05	7.63e-05	6.98e-05	0.000147811	6.61e-05	6.64e-05	9.58e-05	9.97e-05	8.54e-05	7.71e-05	0	0.000121514	5.79e-05	6.49e-05	8.43e-05	8.08e-05	0.000190117	0.000134954	0.0001119	7.91e-05	0.000139427	2.23e-05	0.000128074	2.49e-05	7.57e-05	8.64e-05	8.9e-05	9.63e-05	5.71e-05
K00606_3-methyl-2-oxobutanoate_hydroxymethyltransferase	0.000161064	3.5e-05	5.89e-05	9.73e-05	0.000151342	0.00011776	0.000171879	9.14e-05	0.000266007	5.31e-05	8.88e-05	3.73e-05	0.000156842	0.000389414	9.85e-05	0.0001967	0.000150061	7.81e-05	0.00014908	0.000100968	9.36e-05	4.59e-05	0.000148345	0.000194517	9.28e-05	4.84e-05	8.24e-05	7.49e-05	0.000125377	0.000129387	0.000338091	0.000100031	0.000125549	5.26e-05	9.47e-05	0.00011278	0.000133228	0.00010224	0.000120418	0.000101688	0.000101664	0.000137459	2.18e-05	0.000130195	0.000214248	6.32e-05	0.000140119	6.05e-05
K00608	2.4e-05	2.39e-06	0	0	2.6e-05	1.76e-05	0	9.4e-06	0	1.03e-05	2.63e-05	4.01e-05	0	6.83e-05	0	2.97e-05	0	4.07e-05	0	8.02e-06	8.76e-06	0	4.86e-05	4.58e-06	9.58e-06	0	0	0	0	1.7e-05	8.39e-05	0	0	7.83e-06	6.33e-07	3.06e-05	1.9e-05	0	0	4.76e-06	0	3.33e-05	0	1.29e-05	0	0	1.51e-05	3.57e-05
K00609_aspartate_carbamoyltransferase_catalytic_subunit	0.00136742	0.00141486	0.00104832	0.00174149	0.00124839	0.00175433	0.00134791	0.00148511	0.00144521	0.00147026	0.00130027	0.00138679	0.00199445	0.00183546	0.00137816	0.000866199	0.00126547	0.00098487	0.00139875	0.00108627	0.00141252	0.00105306	0.00111406	0.00109919	0.00124813	0.00163533	0.00183438	0.00113886	0.00171546	0.0011039	0.00132045	0.0016768	0.00164025	0.00146371	0.00129538	0.00152125	0.00115045	0.00130502	0.00157453	0.0011159	0.00106951	0.00119312	0.0011286	0.00127839	0.00158688	0.00153616	0.00106332	0.00102675
K00610_aspartate_carbamoyltransferase_regulatory_subunit	0.000103244	0.000270185	0.000124417	0.000195487	0.000230863	0.000284761	7.19e-05	0.000242423	0.000192934	0.000316851	0.000240156	0.000254511	0.000325202	0.000260221	0.000272784	0.000137594	9.05e-05	0.00024637	0.000132944	0.000147142	0.000234197	0.000121173	0.000214954	0.000318905	0.000266607	0.000206603	0.000241079	0.000214022	0.000231269	0.000292313	0.000133539	0.00023033	0.000297119	0.00026369	0.00020699	0.000320204	8e-05	0.000178533	0.000347212	0.000226997	0.000193378	0.00022694	0.000147863	0.000206587	0.000201235	0.000293829	0.000187508	0.000163096
K00611_ornithine_carbamoyltransferase	0.000799223	0.00161453	0.00113903	0.00116269	0.00103619	0.00125961	0.000514601	0.00119116	0.00121039	0.00109613	0.00101132	0.0010892	0.000647179	0.000698416	0.000784388	0.000896183	0.000616102	0.00132918	0.000976048	0.000797467	0.000935251	0.000897277	0.000930098	0.000633326	0.00115009	0.00109515	0.000748014	0.00116183	0.000911918	0.00108706	0.000763991	0.00135522	0.00122182	0.000997293	0.0012653	0.000848923	0.000753333	0.00145735	0.0011898	0.00123677	0.00108554	0.00117595	0.00154068	0.00117922	0.000976434	0.00122954	0.000982478	0.00132166
K00612_carbamoyltransferase	0	0	2.38e-06	0	3.73e-06	2.32e-06	0	2.69e-06	3.44e-06	2.99e-06	5.72e-06	0	0	0	0	0	8.56e-06	0	2.86e-06	3.89e-06	0	4.12e-06	3.49e-06	8.69e-06	2.1e-06	1.92e-06	2.39e-06	8.91e-06	1.43e-06	9.79e-06	2.4e-06	9.2e-07	5.87e-06	1.27e-06	4.41e-06	0	5.47e-06	0	0	0	0	0	0	0	1.84e-06	0	0	1.07e-05
K00613_glycine_amidinotransferase	5.63e-06	3.8e-05	0	0	6.05e-06	0	1.68e-05	4.36e-06	1.68e-05	1.92e-05	0	5.57e-06	2.87e-06	0	0	5.23e-05	4.38e-06	5.16e-06	4.69e-06	0	0	1.99e-05	1.14e-05	1.29e-05	3.36e-06	2.38e-05	1.11e-05	1.36e-05	2.18e-06	0	2.96e-06	4.02e-05	2.15e-05	5.51e-06	1.42e-05	0	0	1.07e-05	1.18e-05	6.65e-06	1.06e-05	5.9e-06	0	0	8.88e-06	3.24e-06	3.92e-06	3.32e-05
K00614	0	0	8.14e-06	0	0	0	0	0	0	0	0	0	0	0	0	0	0	0	0	0	0	0	0	0	0	0	0	0	0	0	0	1.04e-06	0	0	0	0	0	0	0	0	0	0	0	0	0	0	0	0
K00615_transketolase	0.00164556	0.00177644	0.00205256	0.00229566	0.00226905	0.0018707	0.00248157	0.00155696	0.00170159	0.00196916	0.00229866	0.00186333	0.00182514	0.00190958	0.00186187	0.00300062	0.00212532	0.00198349	0.00222689	0.00205557	0.00199721	0.0021267	0.00196143	0.00200548	0.00189446	0.00152375	0.00171501	0.0016378	0.00148598	0.0018955	0.00174733	0.0021021	0.00226804	0.00205335	0.00226992	0.0017404	0.00203123	0.00214398	0.0025556	0.00189833	0.00288903	0.00224604	0.00190442	0.00252871	0.00197982	0.00193171	0.00224469	0.00204078
K00616_transaldolase	0.000239063	0.000647248	0.000303264	0.000257656	0.000236896	0.000243861	0.000169687	0.000466873	0.000439471	0.000419007	0.000369078	0.000435578	0.00026574	0.00014634	0.000168204	0.000226185	0.000193708	0.000313426	0.000190647	0.000243943	0.000322151	0.000226675	0.000195412	0.000195796	0.000501228	0.000493585	0.000289401	0.000324288	0.000306305	0.000501843	0.000222731	0.00051668	0.000474736	0.000408066	0.000511964	0.000217693	0.000198653	0.000303442	0.000324341	0.000354965	0.000304721	0.000248254	0.000461601	0.000370142	0.000396203	0.00048786	0.000178516	0.000417691
K00619_amino-acid_N-acetyltransferase	0	9.48e-07	0	0	0	0	0	0	0	0	0	4.66e-06	0	0	2.16e-05	0	0	6.02e-06	3.9e-06	5.15e-06	0	4.05e-06	4.78e-06	5.61e-06	2.05e-06	2.3e-05	1.61e-06	3.08e-05	0	0	3.93e-06	5.47e-06	0	0	1.2e-07	0	1.08e-06	0	0	0	7.89e-06	0	0	3.65e-06	0	0	0	0
K00620_glutamate_N-acetyltransferase_/_amino-acid_N-acetyltransferase	0.000249384	0.000669246	0.000266541	0.000102519	0.0001572	0.000218408	0.000123756	0.000412312	0.000349397	0.000435221	0.000196956	0.00048545	0.000226761	9.08e-05	6.86e-05	0.000114613	4.06e-05	0.000349151	8.87e-05	0.000248493	0.000317436	0.000199234	0.000142304	0.000128956	0.000353232	0.000318078	0.000247564	0.000248817	0.000331016	0.000290626	0.000137087	0.000470568	0.000301478	0.000477894	0.000359292	0.000122193	8.75e-05	0.000122888	0.000229541	0.00034806	0.000148921	0.00016854	0.000489774	0.000266879	0.00029929	0.000458492	0.000141569	0.000384925
K00622_arylamine_N-acetyltransferase	0	0	0	0	0	0	0	0	0	0	0	0	0	0	0	0	0	0	0	0	0	0	0	0	0	0	0	0	0	0	0	0	0	0	0	0	0	0	0	0	0	0	0	0	0	0	1.72e-06	0
K00624_carnitine_O-acetyltransferase	0	0	0	0	0	0	0	0	0	0	0	0	0	0	0	0	0	0	0	0	0	0	3.37e-06	0	0	0	0	0	0	0	0	0	0	0	0	0	0	0	0	0	0	0	0	0	0	0	0	0
K00625_phosphate_acetyltransferase	0.00055325	0.000461472	0.000785614	0.000868846	0.000680247	0.000680285	0.000768033	0.000670316	0.000379345	0.000601143	0.000703263	0.00061717	0.000873085	0.000743729	0.000770676	0.00102571	0.000688174	0.000426443	0.00120178	0.00059578	0.000633279	0.000658526	0.000720592	0.000652024	0.000746693	0.000774806	0.000877948	0.000855024	0.000675164	0.000505494	0.000599932	0.000709381	0.000902419	0.00066964	0.000727211	0.000911915	0.000925123	0.00120808	0.00141941	0.000918722	0.00098389	0.00089527	0.000644859	0.000882075	0.000762424	0.000467543	0.00087703	0.000520387
K00626_acetyl-CoA_C-acetyltransferase	0.000144973	0.000152898	0.000178262	0.000154485	0.000184721	0.000118858	0.000129197	0.000103554	0.000117281	0.000181511	0.00011403	0.000143545	0.000150542	0.000115043	0.000125074	0.000286875	0.000152425	0.000103173	0.000236613	0.000125062	0.000174936	0.000139562	0.000150088	0.000196188	0.000141186	0.00017793	0.000136946	0.000260107	0.000100541	0.000187821	0.000121235	0.000184395	0.000220145	0.00016577	0.000199458	0.000184596	0.000162859	0.000270254	0.000233397	0.000145459	0.000368594	0.000155357	0.000135332	0.000360005	0.000134752	7.74e-05	0.000226437	0.000105816
K00627_pyruvate_dehydrogenase_E2_component_(dihydrolipoamide	1.38e-05	6.41e-06	1.57e-05	0	1.22e-05	1.17e-06	1.6e-05	6.24e-06	0	3.1e-06	0	7.97e-06	1.97e-06	0	7.29e-06	7.51e-06	1.85e-05	2.43e-05	0	1.8e-05	3.94e-06	4e-06	1.01e-05	2.05e-05	8.45e-06	1.02e-05	3.52e-06	3.53e-05	6.59e-06	6.73e-06	1.13e-05	1.4e-05	2.01e-06	2.33e-06	3.16e-06	1.87e-06	2.26e-05	3.23e-06	9.59e-06	0	4.59e-06	7e-06	0	2.19e-05	1.83e-06	0	3.5e-06	1.72e-05
K00629_glycerol-3-phosphate_O-acyltransferase	0	0	0	0	0	0	0	0	0	0	0	0	0	0	4.06e-06	0	0	0	0	0	0	0	0	0	0	0	0	0	0	0	0	0	0	0	0	0	0	0	0	0	0	0	0	0	0	0	0	0
K00631_glycerol-3-phosphate_O-acyltransferase	2.64e-06	3.13e-06	6.77e-06	2.58e-06	1.13e-05	0	0	0	0	4.43e-06	8.58e-06	0	0	0	0	0	0	1.45e-05	4.31e-06	2.61e-06	5.6e-06	2.88e-06	2.66e-06	0	3.15e-06	4.19e-06	2.58e-06	0	9.42e-07	3.71e-06	1.85e-05	4.73e-06	1.12e-06	0	1.09e-06	2.13e-06	1.04e-05	7.52e-06	0	2.75e-05	4.9e-06	5.44e-06	0	2.81e-06	1.38e-06	1.53e-06	0	0
K00632_acetyl-CoA_acyltransferase	0	1.98e-06	0	0	0	0	4.82e-06	0	0	4.49e-06	9.07e-06	5.47e-06	0	0	0	2.96e-05	8.29e-06	0	1.32e-05	8.25e-06	0	6.39e-06	5.5e-06	0	0	2.63e-06	0	0	4.17e-06	6.95e-06	1.58e-05	1.45e-05	0	1.16e-06	3.13e-06	2.17e-06	2.15e-06	5.01e-06	2.78e-06	2.58e-05	0	5.69e-06	0	0	0	0	0	5.51e-06
K00633_galactoside_O-acetyltransferase	0.000274413	0.000481623	0.000394699	0.000231677	0.000318852	0.000241554	0.000374769	0.000273162	0.00024987	0.000339378	0.000261957	0.000368788	0.000150201	0.000198149	0.000107453	0.000403408	0.000304875	0.000407613	0.000269837	0.000256753	0.000323404	0.000368352	0.000177191	0.000331711	0.00040761	0.000209544	0.000159306	0.00032329	0.000244826	0.000195491	0.000293859	0.000304942	0.00034587	0.00035888	0.000314698	0.000310513	0.000284446	0.000443833	0.000426019	0.000331736	0.000364152	0.000325766	0.00028635	0.000382088	0.000285465	0.000330021	0.000286399	0.000397141
K00634_phosphate_butyryltransferase	0	4.14e-06	3.91e-05	1.48e-05	2.24e-05	9.33e-06	2.78e-05	1.09e-05	3.13e-05	1.19e-05	1.14e-05	1.37e-05	1.43e-05	2.96e-05	1.09e-05	2.57e-05	1.07e-05	1.28e-05	5.79e-06	1.38e-05	1.5e-05	8.2e-06	6.99e-06	2.39e-05	1.25e-05	7.33e-06	2.33e-06	0	9.43e-06	1.96e-05	7.29e-06	2.58e-05	1.48e-05	1.59e-05	1.26e-05	5.75e-06	1.11e-05	6.61e-06	0	0	1.29e-05	2.87e-05	9.75e-06	2.22e-05	2.2e-05	4.02e-06	2.76e-05	2.04e-05
K00635_diacylglycerol_O-acyltransferase	0	0	0	0	0	0	0	0	0	0	0	4.62e-06	0	0	0	0	0	0	0	0	4.91e-06	0	0	0	0	0	0	0	0	0	0	2.06e-06	0	0	0	0	0	0	0	0	0	0	0	0	0	0	0	0
K00637_sterol_O-acyltransferase	0	0	0	0	0	0	0	3.05e-06	0	0	0	0	0	0	0	0	0	0	0	0	0	0	0	0	0	0	0	0	0	0	0	3.59e-07	0	0	0	0	0	0	0	0	7.58e-06	0	0	0	0	0	3.89e-06	0
K00638_chloramphenicol_O-acetyltransferase	0.000188132	0.000111514	0.000269182	0.000173465	0.000140809	0.000126171	0.000105813	3.89e-05	4.07e-05	0.000110289	9.87e-05	0.000105874	1.06e-05	0.000184959	0.000225046	0.000611752	0.000694	0.000202724	0.00022886	0.000263387	6.55e-05	0.000309667	0.000192993	0.000288457	0.000180009	8.61e-05	6.61e-06	0.00014662	1.78e-05	0.000182644	0.000163295	7e-05	9.39e-05	2.57e-05	6.07e-05	9.34e-05	0.000325957	0.000163375	3.08e-05	0.000142841	0.000260248	0.000197795	0.000123707	0.000203085	7.5e-05	4.79e-05	0.000198021	0.000264566
K00639_glycine_C-acetyltransferase	0.000443918	0.000222418	0.00103636	0.000422119	0.000607845	0.00070462	0.000906471	0.000333909	0.0010701	0.000868199	0.000801396	0.000512976	0.000290322	0.000971343	0.000303777	0.000803026	0.000617087	0.000877597	0.000450474	0.00061069	0.000406722	0.00106799	0.000813287	0.000675959	0.000682961	0.00043627	0.000429319	0.000420178	0.000566963	0.000189591	0.000916555	0.000327712	0.000280629	0.000565195	0.000833596	0.00159357	0.000985889	0.000209263	0.000379227	0.00056345	0.000510044	0.000692929	0.000752466	0.000455052	0.000435713	0.000429782	0.000844155	0.000843119
K00640_serine_O-acetyltransferase	0.00128346	0.00067701	0.00135643	0.00207504	0.00127862	0.00127463	0.00103598	0.00109561	0.00105121	0.00106814	0.00116498	0.00108305	0.00112401	0.00131602	0.0014366	0.00134193	0.00166378	0.0012492	0.00195182	0.000976985	0.00123803	0.00137133	0.00147779	0.00149672	0.00120377	0.0010316	0.00123518	0.00120832	0.00121399	0.00123751	0.00115849	0.00104071	0.0013204	0.000870597	0.000905847	0.00123066	0.00144467	0.00176862	0.00149605	0.000953772	0.00155639	0.00119608	0.000728715	0.00147564	0.00112209	0.000853751	0.00166305	0.00136069
K00641_homoserine_O-acetyltransferase	4.48e-05	4.02e-05	6.56e-05	4.25e-05	6.78e-05	4.57e-05	2.36e-05	9.92e-05	3.42e-05	3.45e-05	5.7e-05	3.35e-05	4.16e-05	6.12e-05	0.000140312	6.61e-05	8.39e-05	9.43e-05	0.000126827	6.13e-05	7.23e-05	7.36e-05	0.000101746	8.79e-05	4.71e-05	3.33e-05	2.42e-05	4.21e-05	3.8e-05	4.97e-05	2.91e-05	3.85e-05	7.72e-05	2.67e-05	5.23e-05	0.000102487	2.7e-05	4.49e-05	3.59e-05	2.44e-05	0.000106002	6.46e-05	0.000128835	3.7e-05	2.4e-05	4.57e-05	7.83e-05	8.64e-05
K00643_5-aminolevulinate_synthase	0	1.04e-06	0	0	1.12e-05	0	0	2.85e-06	0	0	0	0	0	0	0	0	3.9e-06	0	1.18e-05	0	5.71e-06	0	3.67e-06	0	0	0	3.43e-06	1.27e-05	1.02e-06	0	2.02e-06	9.15e-07	2.23e-06	0	1.58e-06	4.26e-06	0	0	1.08e-05	0	0	0	0	0	0	0	2.08e-06	0
K00645_[acyl-carrier-protein]_S-malonyltransferase	0.000448631	0.000126996	0.000323966	0.000410115	0.00037272	0.000327545	0.000531402	0.000559144	0.00035467	0.000277874	0.000274446	0.000347244	0.000799994	0.000445108	0.00069534	0.000336271	0.000640496	0.000212077	0.000683331	0.0005706	0.000337715	0.000280599	0.000436214	0.000556538	0.000291185	0.000514036	0.000797261	0.000438799	0.000571122	0.000366881	0.000483932	0.000356514	0.000567259	0.000368531	0.000236267	0.000441135	0.000463214	0.000474805	0.00084353	0.000273139	0.000364913	0.000359799	0.000183126	0.000375965	0.000469734	0.000218595	0.000417219	0.000269197
K00646_polyketide_synthase	0	0	0	0	0	0	0	0	0	0	0	0	0	0	0	0	0	0	0	0	0	0	0	0	3.09e-06	2.73e-06	0	0	0	0	0	0	0	0	8.16e-07	0	0	0	0	0	0	0	0	0	0	0	0	0
K00647_3-oxoacyl-[acyl-carrier-protein]_synthase_I	5.82e-05	2.83e-05	0.000116535	2.8e-05	0.000112932	7.79e-05	0.000174034	2.48e-05	0.000115886	6.31e-05	0.000180827	3.68e-05	6.51e-05	0.000142405	6.63e-05	0.000116826	0.000149949	9.68e-05	0.000100907	7.3e-05	4e-05	0.000111816	0.000100697	0.00010855	5.05e-05	5.56e-06	3.64e-05	1.28e-05	5.62e-05	7.41e-05	0.000139084	4.97e-05	2.24e-06	5.15e-05	6.34e-05	9.4e-05	9.58e-05	4.5e-05	5.47e-05	0.000117789	0.000137344	7.62e-05	1.48e-05	8.98e-05	2.5e-05	6.42e-05	9.84e-05	6.79e-05
K00648_3-oxoacyl-[acyl-carrier-protein]_synthase_III	0.00050591	0.00015101	0.000279822	0.000958492	0.00042687	0.000670456	0.000334259	0.00047803	0.000166432	0.000344497	0.000166937	0.000299813	0.00101501	0.000291591	0.000654985	0.00035596	0.000674116	0.000233412	0.000570361	0.000534801	0.000368222	0.000225228	0.000580434	0.000527252	0.000322636	0.000594235	0.000846086	0.000483712	0.000521891	0.000371561	0.000271896	0.000426093	0.000558845	0.000468653	0.000297486	0.000484205	0.000455524	0.000347319	0.000752279	0.000378071	0.000347091	0.000291663	0.000191579	0.000397771	0.000442363	0.000381568	0.000452765	0.000228934
K00650_lecithin-cholesterol_acyltransferase	0	0	0	0	0	0	0	0	0	0	0	0	0	0	0	0	0	0	0	0	0	0	0	0	0	0	0	0	0	0	0	3.73e-07	0	0	0	0	0	0	0	0	0	0	0	0	0	0	1.06e-06	0
K00651_homoserine_O-succinyltransferase	0.000972402	0.00167062	0.000899017	0.000875297	0.000735818	0.00102907	0.000882184	0.00131048	0.00115093	0.00153172	0.00115515	0.00132263	0.00114887	0.000481451	0.000819806	0.000592097	0.000747003	0.00123601	0.000777602	0.0012069	0.00102897	0.00104663	0.000835797	0.000809756	0.00116582	0.00142678	0.0013363	0.00127883	0.00127851	0.00107628	0.000707307	0.0013895	0.00129038	0.00128404	0.00121161	0.000818518	0.000724966	0.000942575	0.00120565	0.00108846	0.00072211	0.00112077	0.00146273	0.000947528	0.00110221	0.00167842	0.000768777	0.00123555
K00652_8-amino-7-oxononanoate_synthase	0.000550788	0.000125746	0.000264183	0.000540835	0.000541413	0.000618342	0.000531544	0.000417193	0.00018907	0.000392948	0.000549492	0.000371511	0.000961144	0.000815357	0.000775145	0.000370549	0.000670927	0.00029854	0.000740148	0.000414969	0.000510087	0.000332252	0.0006049	0.0005705	0.000278769	0.00065557	0.000866657	0.000486715	0.000626131	0.000259326	0.000450654	0.000483018	0.000494784	0.000432143	0.000345322	0.000732695	0.000734749	0.000515302	0.00075372	0.000702894	0.000403453	0.000498524	0.000136675	0.000380498	0.000735523	0.000388777	0.000521277	0.000229582
K00654_serine_palmitoyltransferase	0	0	0	0	0	0	0	3.03e-06	0	0	0	0	0	0	0	0	0	0	0	0	3.49e-06	0	0	0	0	0	0	0	0	0	3.18e-07	0	0	0	0	0	0	0	0	0	0	0	0	0	0	0	0	0
K00655_1-acyl-sn-glycerol-3-phosphate_acyltransferase	0.000635975	0.000893774	0.00053705	0.000175024	0.000378742	0.000457639	0.000394107	0.000760273	0.000608094	0.000744007	0.000546317	0.000721227	0.000822113	0.000376088	0.000446635	0.000211029	0.000399829	0.00058882	0.00053492	0.000413086	0.00058369	0.000356318	0.00035497	0.000601437	0.000624097	0.000813106	0.000838909	0.000697509	0.000812334	0.000589581	0.000429803	0.000700803	0.000604143	0.000667604	0.000506497	0.000444552	0.000435459	0.000351414	0.000605228	0.00049626	0.000484822	0.00039866	0.000696138	0.000549472	0.000862435	0.000671626	0.00042586	0.000487618
K00656_formate_C-acetyltransferase	0.00346785	0.00244468	0.00314291	0.00435113	0.00260968	0.00359016	0.00236475	0.00310607	0.00282816	0.00261444	0.0022749	0.00296601	0.00273646	0.00206447	0.00346087	0.00259167	0.00318219	0.0031746	0.00352552	0.00293699	0.0034453	0.00221441	0.00300647	0.00334103	0.00262124	0.00251063	0.002602	0.00347194	0.00326686	0.00293513	0.00173416	0.00283935	0.00336775	0.00235383	0.0024479	0.00270581	0.00239784	0.00319002	0.00362153	0.00193887	0.00327114	0.00231171	0.00256533	0.00326763	0.00272962	0.00311743	0.00307035	0.0028293
K00657_diamine_N-acetyltransferase	0	1.59e-05	0	0	0	0	0	1.04e-05	1.24e-05	0	0	0	6.62e-06	0	0	0	0	0	0	0	1.26e-05	0	1.35e-05	1.53e-05	0	0	0	0	0	0	6.25e-06	1.01e-06	0	0	0	0	0	0	0	0	0	0	0	2.85e-05	7.05e-06	0	3.13e-06	0
K00658_2-oxoglutarate_dehydrogenase_E2_component_(dihydrolipoamide	1.52e-06	0	3.65e-06	6.38e-06	1.81e-05	1.76e-06	0	0	0	4.51e-06	0	5.21e-06	0	7.42e-07	0	1.34e-06	7.97e-06	1.94e-05	4.65e-06	3.53e-06	9.64e-06	1.18e-05	7.11e-06	7.09e-06	0	0	0	0	5.45e-06	1.76e-05	1.36e-05	1.44e-05	0	0	5.29e-06	2.22e-06	4.14e-06	2.12e-05	7.25e-06	7.03e-06	3.85e-05	1.06e-05	0	5.62e-06	0	0	1.89e-06	8.94e-06
K00660_chalcone_synthase	0	0	0	0	5.81e-06	0	0	0	0	0	0	0	0	0	0	0	4.79e-06	0	0	0	0	0	0	0	0	0	0	1.51e-05	0	0	0	0	0	0	0	0	0	0	0	0	0	0	0	0	0	0	0	0
K00661_maltose_O-acetyltransferase	0.00122823	0.00217374	0.00100684	0.000376715	0.000881402	0.000789167	0.000501509	0.00129112	0.000991126	0.00154395	0.000780416	0.00150977	0.000642243	0.000406857	0.000753959	0.000624414	0.000479595	0.00130969	0.000589659	0.00100181	0.000960454	0.00111585	0.000637916	0.000575058	0.00160044	0.0012338	0.000777991	0.000984403	0.000907939	0.00128127	0.000646544	0.00123014	0.00111198	0.00119944	0.00125475	0.000359707	0.000221352	0.000760275	0.00104309	0.00134552	0.00101649	0.000669643	0.00151463	0.000685951	0.00107521	0.00143484	0.000639895	0.00135463
K00662_aminoglycoside_N3'-acetyltransferase	0	8.05e-06	0	8.62e-06	0	2.72e-06	0	6.31e-06	0	1.38e-05	0	8.06e-06	2.91e-05	0	2.55e-05	0	1.87e-05	0	2.03e-05	0	8.78e-06	0	0	0	9.71e-06	8.61e-06	2.67e-06	3.95e-05	0	0	3.19e-06	1.72e-05	1.03e-05	7.95e-06	1.66e-05	0	1.28e-05	1.54e-05	1.68e-05	9.55e-06	4.44e-05	8.38e-06	1.14e-05	0	2.99e-05	0	0	0
K00665_fatty_acid_synthase,_animal_type	0	1.69e-07	0	0	0	0	0	6.62e-07	0	0	0	0	0	0	0	0	0	0	0	0	0	0	0	0	0	0	0	0	0	0	0	0	0	0	0	0	0	0	0	0	0	0	0	0	0	0	3.97e-07	0
K00666_fatty-acyl-CoA_synthase	0.000117302	7.77e-05	0.000246839	0.000139194	0.000196447	0.000153232	8.32e-05	7.83e-05	0.000169269	6.68e-05	0.000177337	0.000109263	3.33e-05	0.000147588	0.000121795	0.00018267	0.000135805	0.000250506	0.000197173	0.000162545	0.000116283	0.000294085	0.000201543	0.000161088	8.12e-05	0.000140355	5.75e-05	8.79e-05	0.000123434	0.000226426	0.000198326	0.000103481	0.00014462	7.45e-05	0.000103296	0.000190267	0.000224317	0.000245172	3.68e-05	0.00014186	0.000214657	0.000267195	9.51e-05	0.000171745	9.05e-05	0.00010164	0.000252203	0.000226285
K00670_peptide_alpha-N-acetyltransferase	0	0	1.67e-06	0	0	0	0	5.59e-06	0	0	0	2.32e-06	0	1.75e-05	0	0	5.02e-06	0	1.47e-05	0	0	0	0	0	0	0	0	0	0	0	0	2.04e-07	0	0	3.61e-06	0	0	0	0	0	0	0	0	0	0	0	0	0
K00671_glycylpeptide_N-tetradecanoyltransferase	0	0	3.39e-06	0	0	0	0	0	0	0	0	0	0	0	0	0	0	0	0	0	0	0	0	0	0	0	0	0	0	0	0	0	0	0	0	0	3.28e-06	0	0	0	0	0	0	0	0	0	0	0
K00673_arginine_N-succinyltransferase	0	0	4.14e-06	0	0	0	0	0	0	0	0	0	0	0	0	0	0	0	0	0	0	0	0	0	0	0	0	0	1.24e-06	0	4.89e-06	5.31e-07	0	0	0	0	4.59e-06	0	0	6.85e-06	0	0	0	0	0	0	0	0
K00674_2,3,4,5-tetrahydropyridine-2-carboxylate_N-succinyltransferase	0.000328632	0.000986998	0.000429821	9.96e-05	0.000463547	0.000595148	0.000232049	0.000702728	0.000854015	0.000779203	0.000435196	0.000645189	0.000323073	0.000178216	0.000272134	0.000245721	0.000121095	0.000759926	0.000103777	0.000473409	0.000655026	0.000482046	0.000390164	0.000275573	0.000600917	0.000521153	0.000345403	0.000305833	0.000591442	0.000693194	0.000468072	0.000680425	0.000371985	0.000642853	0.00064462	0.000388893	0.000284594	0.00020787	2.82e-05	0.000456382	0.000218655	0.000314626	0.000997237	0.00033435	0.000480882	0.000871364	0.000254517	0.000564007
K00675_N-hydroxyarylamine_O-acetyltransferase	0	0	0	0	8.18e-06	0	0	0	0	0	0	0	0	0	0	0	0	0	6.35e-06	0	0	0	0	0	0	0	0	0	0	0	3e-06	0	0	0	1.2e-06	0	0	0	0	1.79e-05	0	0	0	0	0	0	0	0
K00677_UDP-N-acetylglucosamine_acyltransferase	0.000495494	0.000130418	0.000457117	0.000707312	0.000549562	0.000538109	0.000522016	0.000619915	0.000230491	0.000311478	0.000230371	0.000363075	0.000863906	0.000600244	0.000677697	0.000932379	0.00108904	0.0002569	0.000731996	0.000561704	0.000430991	0.000253282	0.00055783	0.000541085	0.000293204	0.000662456	0.000771844	0.000500115	0.000706103	0.000256068	0.000426756	0.000483847	0.000701739	0.000385776	0.000288436	0.000494327	0.000757436	0.000394088	0.000929972	0.000293423	0.00040035	0.00034216	0.000171888	0.000396714	0.000519762	0.000308477	0.000505669	0.000358609
K00679_phospholipiddiacylglycerol_acyltransferase	0	0	0	0	0	0	0	0	0	0	0	3.19e-06	0	0	5.31e-06	0	0	0	0	0	0	0	0	0	0	0	0	0	6.55e-07	0	0	0	0	0	0	1.46e-06	0	0	0	0	0	0	0	0	0	0	0	0
K00680	0.000384178	0.000216685	0.000413214	0.000398253	0.000345138	0.000308331	0.000400011	0.000188849	0.000290584	0.000352062	0.000304982	0.000293504	4.2e-05	0.000486752	0.00022455	0.000671233	0.000934714	0.000325603	0.000576385	0.00040825	0.000196673	0.000505944	0.000514811	0.000484628	0.000518349	0.000328193	7.21e-05	0.00032116	8.36e-05	0.000245917	0.000353163	0.000125616	0.000238067	0.000151089	0.000343823	0.000366586	0.000554096	0.000825736	0.00023284	0.00048801	0.000569964	0.000536413	0.000252804	0.000340732	0.000295097	0.000180152	0.000492492	0.00044342
K00681_gamma-glutamyltranspeptidase	3.54e-05	2.28e-05	2.98e-05	2.55e-05	3.39e-05	3.6e-05	7.97e-06	5.6e-05	5.98e-05	4.09e-05	3.27e-05	5.89e-05	5.74e-05	4.69e-05	6.92e-05	5.69e-05	4.27e-05	4.29e-05	3.27e-05	1.19e-05	4.71e-05	4.2e-05	1.98e-05	2.75e-05	4.43e-05	4.41e-05	5.11e-05	7.73e-05	3.35e-05	1.12e-05	2.56e-05	3.31e-05	3.56e-05	5.73e-05	4.59e-05	6.24e-05	4.12e-05	2.24e-05	2.37e-05	5.95e-05	5.22e-05	4.46e-05	6.73e-05	2.97e-05	2.94e-05	4.61e-05	5.12e-05	3.09e-05
K00683_glutaminyl-peptide_cyclotransferase	0	0	0	0	0	0	0	0	0	0	0	0	0	0	0	0	0	0	0	0	0	0	0	0	0	0	0	0	0	0	0	0	0	0	0	0	0	0	0	0	0	0	0	0	0	0	1.34e-06	0
K00684_leucyl/phenylalanyl-tRNA--protein_transferase	5.06e-05	1.18e-05	2.22e-05	0	3.32e-05	3.48e-05	2.9e-05	7.71e-06	1.11e-05	0	0	0	9.15e-05	1.4e-05	0.00011276	1.83e-05	4.51e-05	3.86e-05	3.3e-05	7.89e-05	0.000104164	1.17e-05	2.99e-05	3.41e-05	5.93e-05	4.19e-05	9.77e-05	7.22e-05	5.38e-05	4.19e-05	2.64e-05	3.18e-05	1.69e-05	6.45e-05	9.79e-06	2.94e-05	7.13e-05	3.88e-05	0.000133749	0	1.85e-05	1.02e-05	0	3.17e-05	5.74e-05	2.29e-05	6.89e-05	3.8e-05
K00685_arginine-tRNA-protein_transferase	0	3.18e-06	0	0	9.63e-06	0	0	0	0	0	0	0	0	0	0	0	0	0	0	0	0	1.84e-05	0	0	0	4.28e-06	0	0	0	0	1.13e-06	3.6e-06	0	0	2.78e-06	7.18e-06	0	0	0	0	0	0	0	0	0	0	1.95e-06	0
K00687_penicillin-binding_protein_2B	2.99e-06	1.81e-06	6.26e-06	0	0	0	0	2.34e-06	0	0	0	0	0	0	0	0	2.34e-06	0	0	0	0	0	0	0	0	0	0	0	0	8.46e-06	1.18e-06	1.06e-06	0	0	4.75e-07	0	0	0	0	0	0	0	0	0	0	0	7.01e-07	8.88e-06
K00688_starch_phosphorylase	0.00230956	0.0022025	0.00222889	0.00230596	0.00252105	0.0024799	0.00303785	0.00248841	0.00219256	0.00247262	0.00258572	0.00236495	0.00244307	0.00268182	0.00247047	0.00266618	0.00230269	0.00233455	0.00225907	0.00253711	0.00261948	0.00224802	0.00233159	0.00250232	0.00235939	0.0023614	0.00237737	0.00203711	0.00252512	0.00244181	0.00227879	0.00255391	0.00244674	0.00261582	0.00226048	0.00226714	0.00207175	0.00194994	0.00231581	0.00222735	0.00205291	0.00236431	0.00200009	0.00251838	0.00250165	0.00240221	0.00236579	0.00222918
K00689_dextransucrase	0	1.12e-06	1.64e-05	0	0	0	0	2.24e-06	0	0	0	1.46e-06	0	0	0	0	1.12e-06	0	0	2.86e-06	0	0	0	0	0	7.78e-07	4.47e-07	0	0	0	0	3.51e-07	0	0	0	0	0	0	0	0	1.41e-06	0	0	0	0	0	0	2.83e-06
K00690_sucrose_phosphorylase	0.00053934	0.00137151	0.000482244	0.000147109	0.000439211	0.000654704	0.000278333	0.000955859	0.000786784	0.00105953	0.000475948	0.00086836	0.000472586	0.000113178	0.00022541	2.4e-05	1.02e-05	0.000945802	6.74e-05	0.000659723	0.000643295	0.000612011	0.000405778	0.000134867	0.000936344	0.000823708	0.000514729	0.000509747	0.000818995	0.000731718	0.000358996	0.000952344	0.000545058	0.000946336	0.000723375	0.000166314	3.34e-05	0.000255815	0.000118155	0.000744894	0.000227791	0.000464866	0.00118254	0.000411833	0.000637823	0.00105771	0.000263403	0.000886823
K00691_maltose_phosphorylase	0	2.11e-05	2.48e-05	0	0	3.82e-06	2.84e-06	0	2.47e-06	0	4.63e-06	0	0	0	1.29e-05	5.25e-06	6.32e-06	2.63e-06	9.31e-06	3.88e-05	0	9.87e-06	2.86e-06	3.24e-06	0	4.48e-06	0	0	4.4e-06	1.14e-05	7.7e-06	2.66e-06	2.43e-06	1.73e-06	5.81e-06	0	1.71e-05	2.41e-05	0	3.52e-05	2.58e-05	8.76e-06	0	5.91e-06	1.99e-07	4.92e-06	1.99e-06	1.38e-05
K00692_levansucrase	0	0	0	0	4.75e-06	0	0	0	0	0	0	0	0	0	1.06e-05	0	0	0	0	0	0	0	0	0	0	0	0	0	0	0	0	0	0	0	0	0	0	0	0	0	0	0	0	0	0	0	0	0
K00693_glycogen(starch)_synthase	0	0	4.35e-07	0	0	1.69e-07	0	3.92e-07	0	0	0	0	0	0	4.78e-06	0	0	0	2.1e-07	0	0	0	0	0	0	0	0	0	3.66e-08	0	3.96e-08	0	0	1.23e-07	0	0	0	0	0	0	0	0	0	0	0	0	2.2e-07	0
K00694_cellulose_synthase_(UDP-forming)	2.02e-05	3.97e-06	4e-06	0	1.31e-05	1.84e-06	0	2.17e-06	0	0	0	0	0	0	0	2.53e-05	1.73e-05	2.47e-06	1.07e-05	1.42e-05	1.18e-05	3.27e-06	0	1.59e-05	1.93e-05	1.9e-05	0	0	3.27e-06	0	1.73e-05	5.19e-06	0	9.41e-07	2.21e-06	1.24e-05	4.9e-05	8.49e-06	2.92e-06	9.25e-06	1.66e-05	6.26e-06	0	1.71e-05	4.45e-06	0	3.78e-06	2.28e-05
K00695_sucrose_synthase	0	0	0	0	0	0	0	0	0	0	0	0	0	0	0	4.88e-06	0	0	0	0	0	0	2.73e-06	3.04e-06	0	0	0	0	0	0	3.48e-07	2.36e-07	0	0	0	0	2.09e-06	0	0	0	0	0	0	0	0	0	0	0
K00696_sucrose-phosphate_synthase	0	0	0	0	0	6.86e-07	0	0	0	0	0	0	0	3.01e-06	0	0	1.63e-06	0	0	0	0	0	0	0	0	0	0	0	0	0	0	0	0	0	4.86e-07	0	0	0	0	0	0	0	0	0	0	0	4.69e-07	0
K00697_alpha,alpha-trehalose-phosphate_synthase_(UDP-forming)	0	0	3.04e-06	7.49e-06	4.84e-06	0	4.39e-06	0	0	0	0	0	0	0	0	0	1.01e-05	4.12e-06	3.93e-06	4.36e-06	7.29e-06	5.44e-06	1.02e-05	5.16e-06	0	0	0	1.07e-05	1.73e-06	0	5.88e-06	2.44e-06	0	0	6.78e-07	5.67e-06	0	7.01e-06	1.66e-05	1.07e-05	0	0	0	4.57e-06	0	2.61e-06	2.07e-06	0
K00698_chitin_synthase	0	0	0	0	0	0	0	0	0	0	0	0	0	0	0	0	0	0	2.78e-06	0	0	0	0	0	0	0	0	0	2.88e-07	0	0	0	0	0	0	2.68e-06	0	0	0	0	0	0	0	3.55e-06	0	0	0	0
K00699_glucuronosyltransferase	0	0	0	0	0	1.36e-06	0	6.07e-06	0	0	0	0	0	0	4.64e-06	0	3.11e-06	0	3.37e-06	0	4.37e-06	0	0	4.65e-06	0	0	0	0	0	0	5.28e-07	3.57e-07	0	0	0	1.72e-06	0	0	3.27e-06	0	5.88e-06	5.34e-06	0	0	0	0	6.76e-06	0
K00700_1,4-alpha-glucan_branching_enzyme	0.00261469	0.00189378	0.00270837	0.00334384	0.00275257	0.00259915	0.002969	0.0021889	0.00245146	0.00236229	0.00263457	0.00220492	0.00216971	0.00307234	0.00263038	0.00322222	0.00281231	0.0026457	0.00268644	0.00267476	0.00241157	0.00240633	0.00261181	0.00272884	0.00250926	0.00204026	0.00236373	0.00226063	0.00251339	0.00230734	0.00274931	0.00225997	0.00243747	0.00225281	0.0022847	0.00269638	0.00286529	0.00225896	0.00252679	0.00248926	0.0027401	0.00278619	0.00207199	0.00263367	0.00261607	0.00207053	0.00275973	0.00240631
K00701_cyclomaltodextrin_glucanotransferase	0	0	0	0	0	0	0	0	0	0	0	0	0	0	0	6.17e-06	0	0	1.23e-06	0	0	0	0	0	0	0	0	0	0	0	0	3.9e-07	0	0	0	0	0	0	0	0	0	0	0	0	1.55e-06	0	0	0
K00702_cellobiose_phosphorylase	0.000226419	0.000162384	0.000427433	0.000339483	0.000246802	0.000273812	0.000253747	0.000225988	0.000289605	0.000311079	0.000177035	0.000275651	0.000273542	0.000206111	0.000311376	0.00039553	0.000349377	0.000344269	0.000479461	0.000265258	0.000199991	0.000339397	0.000334661	0.000311375	0.000279783	0.000154972	0.000223874	0.000250106	0.000208297	0.000211933	0.000319392	0.000238755	0.000333362	0.000293279	0.000270936	0.000336984	0.000393505	0.000404039	0.000416803	0.000214537	0.000437696	0.000316439	0.000266571	0.000404669	0.000201548	0.000217023	0.000340342	0.00033037
K00703_starch_synthase	0.000833829	0.000413349	0.00075776	0.00102597	0.000955791	0.000844752	0.000940699	0.000714177	0.000775028	0.000784161	0.000882333	0.000792964	0.000776286	0.000886479	0.000983909	0.00134702	0.000855513	0.000850673	0.000881299	0.000725141	0.000804824	0.000860525	0.000986678	0.00112889	0.000672075	0.000548481	0.000618396	0.000730035	0.000690219	0.000683436	0.000790106	0.000693197	0.000746287	0.000620955	0.000779408	0.00111993	0.0011043	0.000803961	0.00100688	0.00071817	0.00103907	0.000759303	0.000594549	0.000997988	0.000723031	0.000588252	0.00095356	0.000703165
K00705_4-alpha-glucanotransferase	0.00152733	0.00215401	0.00134876	0.00113829	0.00151426	0.00145061	0.00114819	0.00151894	0.00153524	0.00176351	0.00145157	0.00162115	0.00136976	0.0012075	0.00126383	0.00107323	0.00118796	0.00144048	0.0013764	0.00133433	0.00135377	0.0014325	0.00136937	0.00109908	0.00149755	0.0015768	0.00138567	0.00139294	0.00157589	0.00150483	0.00129745	0.00168437	0.00143368	0.00162023	0.00145146	0.00101958	0.00106	0.00152596	0.00131745	0.00141915	0.00122936	0.00137718	0.00207718	0.00145862	0.00139362	0.00154812	0.00125346	0.00176633
K00709_histo-blood_group_ABO_system_transferase	0	0	0	0	0	0	0	0	0	0	0	0	0	0	0	0	0	0	0	0	0	0	0	0	0	0	0	0	0	0	0	0	0	0	0	0	0	0	0	0	9.17e-06	0	0	0	0	0	3.81e-06	0
K00710_polypeptide_N-acetylgalactosaminyltransferase	0	0	2.48e-06	0	0	0	0	2.09e-06	0	0	0	0	0	0	1.26e-05	0	2.61e-06	0	4.83e-06	3.57e-06	0	0	3.7e-06	0	2e-06	0	0	8.41e-06	0	0	0	0	0	0	0	0	0	0	0	0	6.42e-06	3.51e-06	0	0	0	0	4.33e-06	0
K00712_poly(glycerol-phosphate)_alpha-glucosyltransferase	0	5.06e-06	3.81e-05	0	0	4.22e-06	0	0	0	0	0	0	0	0	6.69e-06	0	0	0	0	8.52e-06	0	0	0	0	0	0	1.4e-06	0	8.25e-07	0	5.55e-07	1.12e-06	0	0	6.6e-07	1.77e-06	3.34e-06	0	8.79e-06	0	7.88e-06	0	0	4.52e-06	2.23e-06	0	9.88e-07	8.23e-06
K00713_putative_LPS_biosynthesis_enzyme	0	0	0	0	0	0	0	0	0	0	0	0	0	0	0	0	0	0	0	0	0	0	0	0	0	0	0	0	0	0	2.95e-06	4.98e-07	0	0	0	0	0	0	0	6.64e-06	0	0	0	0	0	0	0	0
K00714_wingless-type_MMTV_integration_site_family,_member_8	0	0	0	5.05e-06	0	0	0	0	0	0	0	0	0	0	8.55e-06	0	0	0	0	0	0	0	0	0	0	0	0	0	0	0	0	0	0	0	0	0	0	0	0	0	0	0	0	0	0	0	0	0
K00715_ganglioside_galactosyltransferase	0	0	0	0	0	0	0	0	0	0	0	0	0	0	0	0	0	0	0	0	0	0	0	6.45e-06	0	0	0	0	0	0	0	0	0	0	0	0	0	0	0	0	0	0	0	0	0	0	1.34e-06	0
K00716_galactoside_3(4)-fucosyltransferase_3	0	1.14e-06	0	0	0	0	0	0	0	0	0	0	0	0	0	0	0	0	0	0	0	0	0	0	1.15e-06	0	0	0	0	0	2.51e-07	0	0	0	0	0	0	0	0	0	0	0	0	0	0	0	0	0
K00717_glycoprotein_6-alpha-L-fucosyltransferase	0	0	0	0	0	0	0	0	0	0	0	0	0	0	0	0	2.86e-06	0	0	0	0	0	0	0	3.57e-06	0	0	0	0	0	0	0	0	0	0	0	0	0	0	0	0	0	0	0	0	0	0	0
K00718_galactoside_2-L-fucosyltransferase	0	0	4.03e-06	0	0	0	0	0	0	0	0	0	0	0	9.22e-06	0	0	0	0	0	0	0	4.42e-06	0	0	0	0	0	0	0	0	0	0	0	0	0	0	0	0	0	0	0	0	0	0	0	0	0
K00719_galactosylgalactosylglucosylceramide	0	0	0	0	0	0	0	4.03e-06	0	0	0	0	0	0	0	0	0	0	0	0	0	0	0	0	0	0	0	0	0	0	0	0	0	0	0	0	0	0	0	0	0	0	0	0	0	0	0	0
K00720_ceramide_glucosyltransferase	0	0	0	0	0	0	0	0	0	0	0	0	0	0	0	0	0	0	0	0	0	0	0	0	0	0	0	0	0	0	7.12e-07	5.21e-07	0	0	0	0	0	0	0	0	0	0	0	0	0	0	0	0
K00721_dolichol-phosphate_mannosyltransferase	0.000893414	0.000239109	0.000717077	0.00137175	0.000927218	0.00100139	0.00174339	0.000960835	0.000612055	0.000536103	0.00099545	0.000660182	0.00126025	0.00140808	0.000936425	0.00108379	0.00123045	0.000750551	0.00117117	0.00102753	0.000857484	0.000720967	0.00126621	0.00103545	0.000448734	0.000706876	0.00108833	0.000839854	0.000895125	0.000647669	0.00103126	0.000638468	0.000806326	0.000715688	0.000691887	0.00110936	0.000998658	0.000565589	0.000957604	0.000549555	0.000526346	0.000806994	0.000400596	0.000547784	0.000835754	0.000499376	0.00100874	0.000438807
K00722_globoside_alpha-N-acetylgalactosaminyltransferase	0	0	0	0	0	0	0	0	0	0	0	0	0	0	0	0	0	0	0	0	0	0	0	0	0	0	0	0	0	0	0	0	0	0	0	0	0	0	0	0	0	0	0	0	0	0	1.44e-06	0
K00726_alpha-1,3-mannosyl-glycoprotein	0	0	0	0	0	0	0	0	0	0	0	5.04e-06	0	0	0	0	0	0	4.22e-06	0	0	0	0	0	0	0	0	0	0	0	0	0	0	0	0	0	3.74e-06	0	0	0	0	0	0	0	0	0	0	0
K00728_dolichyl-phosphate-mannose-protein_mannosyltransferase	0	0	0	0	0	0	0	0	0	0	0	0	0	0	0	0	0	0	0	0	0	0	0	0	0	0	0	0	0	0	0	0	0	0	0	0	0	0	0	0	0	0	0	0	0	0	0	2.08e-06
K00729_dolichyl-phosphate_beta-glucosyltransferase	0	0	0	0	0	0	0	0	0	0	0	0	0	0	1.04e-05	0	0	0	0	0	0	0	0	0	0	0	0	0	0	0	0	0	0	0	0	0	0	0	0	0	0	0	0	0	0	0	0	0
K00731_glycoprotein-N-acetylgalactosamine_3-beta-galactosyltransferase	0	0	0	0	0	0	0	0	0	0	0	0	0	0	0	0	0	0	0	0	0	0	5.88e-06	0	0	0	0	0	0	0	0	0	0	0	0	0	0	0	0	0	0	0	0	0	0	0	0	0
K00733_xylosylprotein_4-beta-galactosyltransferase	0	0	0	0	0	0	0	4.8e-06	0	0	0	0	0	0	0	0	0	0	0	0	0	0	0	0	0	0	0	0	0	0	0	0	0	0	0	0	0	0	0	0	0	0	0	0	0	0	1.93e-06	0
K00736_alpha-1,6-mannosyl-glycoprotein	0	0	0	0	0	0	0	0	0	0	0	0	0	0	6.71e-06	0	0	0	0	0	0	0	0	0	0	0	0	0	0	0	0	0	0	0	0	0	0	0	0	0	8.92e-06	0	0	0	0	0	0	0
K00737_beta-1,4-mannosyl-glycoprotein	0	1.34e-06	0	0	0	0	0	0	0	0	0	3.97e-06	0	0	6.33e-06	0	0	0	0	0	5.97e-06	0	0	0	0	0	0	0	0	0	1.77e-06	0	0	0	6.42e-07	0	0	0	0	7.95e-06	0	0	0	0	0	0	0	0
K00738_alpha-1,3-mannosylglycoprotein	0	0	0	0	0	0	0	3.02e-06	0	0	0	0	0	0	0	0	0	0	0	0	0	0	0	0	0	0	0	0	0	0	0	0	0	0	0	0	0	0	0	0	0	0	0	0	0	0	1.88e-06	0
K00739_acetylgalactosaminyl-0-glycosyl-glycoprotein	0	0	0	0	0	0	0	0	0	0	0	0	0	0	0	0	4.29e-06	0	0	0	0	0	0	0	0	0	1.79e-06	0	0	0	0	0	0	0	0	0	0	0	0	0	0	0	0	0	0	0	0	0
K00742_N-acetyllactosaminide_beta-1,6-N-acetylglucosaminyltransferase	0	0	0	0	0	0	0	0	0	0	0	0	0	0	0	0	0	0	0	0	0	0	0	0	0	0	0	0	0	0	0	0	0	0	0	0	0	0	0	0	0	0	0	0	0	0	1.34e-06	0
K00743_N-acetyllactosaminide_3-alpha-galactosyltransferase	0	0	0	0	0	0	0	0	0	0	0	0	0	0	1.09e-05	0	0	0	0	0	0	0	0	0	0	0	0	0	0	0	0	0	0	0	0	0	0	0	0	0	0	0	0	0	0	0	0	0
K00744_alpha-1,3(6)-mannosylglycoprotein	0	0	0	0	0	0	0	0	0	0	0	0	0	0	0	0	0	0	2.4e-06	0	0	0	0	0	0	0	0	0	0	0	0	0	0	0	0	0	0	0	0	0	0	0	0	0	0	0	0	0
K00746_N-acetylgalactosaminyltransferase_I	0	0	0	4.64e-06	0	0	0	0	0	0	0	0	0	0	0	0	0	0	0	0	0	0	0	0	0	0	0	0	0	0	0	0	0	0	0	0	0	0	0	0	0	0	0	0	0	0	0	0
K00747_N-Acetylgalactosaminyltransferase_II	0	0	0	0	0	0	0	2.16e-06	0	0	0	0	0	0	4.34e-06	0	0	0	0	0	0	0	2.78e-06	0	0	0	0	0	0	0	0	0	0	0	0	0	0	0	0	0	0	0	0	0	0	1.6e-06	1.29e-06	0
K00748_lipid-A-disaccharide_synthase	0.000270911	7.79e-05	0.000233523	0.00018683	0.000191129	0.000258363	0.000204993	0.000293257	0.000186495	0.000185127	0.000118885	0.000192502	0.000504151	0.000134823	0.000338352	0.000133364	0.000318719	0.000142917	0.000310026	0.000213875	0.000234741	0.000171412	0.00023675	0.000317087	0.000213362	0.000352228	0.000501205	0.000382248	0.00037429	0.000211301	0.000164666	0.000266634	0.000351599	0.000274531	0.000111362	0.000302815	0.000396921	0.000162182	0.000385723	0.000236213	0.000225994	0.00017848	8.8e-05	0.000242932	0.000229027	0.000206977	0.000269873	0.000148127
K00749_alpha-1,3-glucan_synthase	2.96e-08	2.96e-07	8.23e-08	0	2.37e-07	4.42e-08	1.07e-07	2.57e-07	1.21e-07	6.93e-08	7.23e-08	5.16e-08	9.39e-08	4.54e-09	0	2.75e-08	1.53e-08	2.89e-07	0	6.99e-08	1.64e-07	2.68e-07	2.7e-07	1.13e-08	3.19e-07	3.48e-07	1.22e-07	0	1.68e-07	8.27e-08	3.61e-08	1.57e-07	1.4e-07	2.95e-07	1.37e-07	4.11e-07	3.48e-08	3.8e-08	0	2.83e-07	6.42e-08	2.85e-08	1.39e-07	1.26e-07	1.9e-07	1.82e-07	2.7e-08	3.86e-08
K00750_glycogenin_glucosyltransferase	0	0	0	0	0	0	0	3.33e-06	0	0	0	0	0	0	0	0	0	0	0	0	0	0	0	0	0	0	0	0	0	0	0	0	0	0	0	1.38e-06	0	0	0	0	0	0	0	0	0	0	1.02e-06	0
K00752_hyaluronan_synthase	0	5.46e-06	0	0	3.69e-06	0	3.44e-06	5.68e-06	0	2.93e-06	0	3.42e-06	0	0	0	0	0	0	8.59e-06	0	7.44e-06	8.11e-06	0	0	2.06e-06	1.09e-05	3.39e-06	0	2.66e-06	0	2.25e-06	6.07e-06	2.92e-06	2.24e-06	2.2e-06	4.37e-06	2.71e-06	3.27e-06	0	0	0	0	4.82e-06	1.1e-05	0	1.99e-06	5.72e-06	0
K00754	6.15e-05	7.63e-06	3.82e-05	1.24e-05	7.08e-05	2.89e-05	3.39e-05	1.88e-05	8.66e-05	1.48e-05	2.6e-05	2.99e-05	2.23e-06	6.16e-05	2.23e-05	5.67e-05	5.43e-05	3.76e-05	1.67e-05	2.59e-05	2.35e-05	1.93e-05	5.39e-05	4.44e-05	3.62e-05	3.36e-06	1.25e-05	2.91e-05	1.67e-05	2.89e-05	7.68e-05	8.71e-06	1.71e-05	8.21e-06	3.31e-05	5.49e-05	2.51e-05	1.79e-05	5.7e-06	3.26e-05	1.88e-05	5.1e-05	3.53e-05	2.15e-05	4.39e-05	9.53e-06	3.2e-05	6.26e-05
K00756_pyrimidine-nucleoside_phosphorylase	7.15e-05	4.25e-05	5.31e-05	0.000108512	0.000105009	4.01e-05	8.4e-05	1.51e-05	0.000183359	6.68e-05	8.51e-05	6.78e-05	1.99e-05	9.07e-05	0.000113	7.24e-05	0.00011682	4.81e-05	3.65e-05	5.36e-05	7.06e-05	3.58e-05	6.48e-05	5.9e-05	9.6e-05	8.23e-05	6.39e-05	0.00010398	3.36e-05	0.000192941	6.02e-05	4.38e-05	6.81e-05	3.95e-05	5.23e-05	6.08e-05	7.28e-05	0.000111487	0.000201864	3.41e-05	0.000117379	6.3e-05	0.000150017	0.000109332	7.11e-05	3.97e-05	8.89e-05	0.000101092
K00757_uridine_phosphorylase	0.000273717	0.000238228	0.000249842	0.000263701	0.000266779	0.000266425	0.000243212	0.000324433	0.000202226	0.00028768	0.000239273	0.000234509	0.000327248	0.000245911	0.000332463	0.000357544	0.000344764	0.000303895	0.000456965	0.000229424	0.000279933	0.000232913	0.000383679	0.000428572	0.000314568	0.000349404	0.000294836	0.000306539	0.000268932	0.000225863	0.000305034	0.000267908	0.000391903	0.000222292	0.000247421	0.000386597	0.000284197	0.000514807	0.000492522	0.00025046	0.000511923	0.000361396	0.000235843	0.000320218	0.000286276	0.000177846	0.000339732	0.000317115
K00758_thymidine_phosphorylase	6.59e-06	1.93e-06	1.47e-05	2.12e-05	5.25e-06	5.87e-06	1.41e-05	3.72e-06	6.66e-06	3.61e-06	2.65e-06	0	2.54e-06	6.82e-06	1.61e-05	0	1.15e-05	1.49e-05	3.24e-05	4.83e-06	3.54e-06	1.6e-05	8.54e-06	1.97e-05	1.74e-05	0	1.07e-07	3.02e-06	6.07e-06	2e-05	1.02e-05	2.31e-06	2.95e-07	2.13e-07	1.54e-07	3.18e-06	8.01e-06	1.4e-05	0	1.12e-05	1.11e-05	2.54e-06	6.86e-06	5.11e-06	3.55e-06	2.88e-06	1.61e-05	4.97e-06
K00759_adenine_phosphoribosyltransferase	0.000741952	0.000473907	0.00040427	0.000542928	0.000384628	0.000438717	0.000289487	0.00059803	0.000190543	0.000511427	0.000442928	0.000449746	0.00102211	0.00017239	0.00103199	0.000337394	0.00110441	0.000378906	0.00068506	0.000537678	0.000583739	0.000295534	0.000582326	0.000635121	0.000456913	0.00102049	0.00128769	0.000828654	0.000650813	0.000491687	0.000370094	0.00049162	0.00060485	0.000769168	0.000356819	0.000542634	0.00063264	0.000530379	0.000961108	0.000507783	0.000499742	0.000458499	0.00044904	0.000852458	0.000710192	0.000329647	0.000585667	0.000363137
K00760_hypoxanthine_phosphoribosyltransferase	0.000433044	0.000744342	0.000416401	0.000313187	0.000278046	0.000305239	0.000258977	0.000450972	0.000394515	0.000685973	0.000478183	0.000462659	0.00042998	0.000268271	0.00046665	0.000218622	0.000351901	0.000353788	0.000471698	0.000301465	0.000506949	0.000492574	0.000319652	0.000483769	0.000580505	0.000740099	0.000510023	0.00073461	0.000428813	0.000601956	0.000296376	0.000567609	0.000516049	0.000456658	0.000501825	0.000434592	0.000450121	0.000605498	0.000559625	0.000369384	0.000484639	0.00037552	0.000706137	0.000515844	0.000601506	0.000609224	0.000349271	0.000576046
K00761_uracil_phosphoribosyltransferase	0.00140671	0.00192339	0.00126285	0.000841724	0.00153983	0.0013173	0.00116956	0.00161624	0.00149375	0.00178417	0.00112577	0.00170581	0.00143956	0.000744477	0.00118357	0.00115469	0.00105571	0.00138623	0.000996048	0.00137824	0.00144182	0.00127717	0.00108978	0.00108	0.00174045	0.00187345	0.00146534	0.0014395	0.0015889	0.00164233	0.00103329	0.00175169	0.00145741	0.00173008	0.00140759	0.00101698	0.00100299	0.00158191	0.00110303	0.00132333	0.00114421	0.00125971	0.00162226	0.00159687	0.00153733	0.0020708	0.00112342	0.00158393
K00762_orotate_phosphoribosyltransferase	0.000761557	0.0010046	0.000758083	0.000939735	0.00105059	0.000863923	0.000751027	0.00101642	0.000667196	0.000997044	0.000732341	0.000996925	0.00111837	0.000840614	0.000997763	0.00104878	0.00104112	0.000865755	0.00104984	0.000847797	0.00108619	0.000771355	0.000866521	0.00114762	0.000860619	0.000861001	0.000971933	0.000635402	0.000810327	0.000994772	0.000842285	0.00111707	0.00103905	0.000955069	0.000999997	0.000864836	0.000889823	0.00100798	0.00108328	0.00089516	0.000993104	0.000933462	0.00101306	0.00102671	0.00104005	0.00103191	0.000929536	0.000721782
K00763_nicotinate_phosphoribosyltransferase	0.000759422	0.0015006	0.000806644	0.000354938	0.000746532	0.000844316	0.000472354	0.00106788	0.00104613	0.00112655	0.000807939	0.0011792	0.00063327	0.000688418	0.000461345	0.000553497	0.000340914	0.00107322	0.000449336	0.000695731	0.000927199	0.000888163	0.000628963	0.000544426	0.00114886	0.0009313	0.000571581	0.000843489	0.000972095	0.00111185	0.000545297	0.00116875	0.00089278	0.00108164	0.00106216	0.000478072	0.000363735	0.000803006	0.000466329	0.000795828	0.00057476	0.000738717	0.00139166	0.000690681	0.00106759	0.00151151	0.00054493	0.000941925
K00764_amidophosphoribosyltransferase	0.00179492	0.00132651	0.00183406	0.00178843	0.00158511	0.00170771	0.00190388	0.00160647	0.00130097	0.00160365	0.00181014	0.00171525	0.00182838	0.00190158	0.00176283	0.00130652	0.00144144	0.00198059	0.00182438	0.00168818	0.00199555	0.001591	0.00180383	0.00172963	0.0015298	0.00153849	0.00174509	0.00133329	0.00182847	0.00140984	0.00124205	0.00192923	0.00192948	0.00181086	0.00163072	0.00170829	0.00155247	0.00144415	0.00164598	0.00150085	0.00131145	0.00167797	0.00140097	0.00156485	0.00160347	0.0020945	0.00209438	0.00151387
K00765_ATP_phosphoribosyltransferase	0.000411811	0.000535117	0.000522893	0.000572697	0.000515314	0.000428647	0.000502238	0.000477429	0.000295255	0.000574527	0.000574653	0.000703212	0.000725302	0.000271883	0.000592631	0.000709713	0.000687963	0.00050756	0.000535932	0.000576912	0.00050567	0.000465687	0.000433212	0.000603894	0.000624322	0.000520498	0.00052169	0.000586659	0.00049041	0.000699298	0.00034217	0.000699836	0.000767695	0.000668711	0.000626603	0.000324214	0.00047003	0.000532356	0.000920511	0.000467351	0.00087712	0.000594461	0.000529995	0.00089561	0.000528403	0.000535468	0.000556824	0.000380107
K00766_anthranilate_phosphoribosyltransferase	0.000873236	0.00105217	0.000746554	0.000923686	0.000759687	0.000952602	0.000752829	0.00100327	0.00067823	0.000758643	0.000627508	0.00109062	0.00107571	0.000339786	0.000960235	0.000634788	0.00105349	0.000658124	0.00112666	0.000734756	0.000742468	0.000673108	0.000699833	0.000725956	0.000936337	0.00107973	0.00132042	0.00117641	0.00104855	0.000803661	0.0005287	0.00106856	0.00112892	0.00100306	0.000811444	0.000694647	0.000879516	0.00109231	0.00136957	0.000861526	0.000497027	0.000663463	0.000930648	0.000973999	0.000838689	0.000874324	0.000840984	0.000816198
K00767_nicotinate-nucleotide_pyrophosphorylase_(carboxylating)	0.000699914	0.000318499	0.000457319	0.000981698	0.000599152	0.000789942	0.0011031	0.000725641	0.000571162	0.00058998	0.000726947	0.000566931	0.00114651	0.000943845	0.000701382	0.000743089	0.000897421	0.000412805	0.000800153	0.000629242	0.000526126	0.00041771	0.000645582	0.000814393	0.000453357	0.00073996	0.000962484	0.000657947	0.000898995	0.000506765	0.000788256	0.000669633	0.000811638	0.000595193	0.00054254	0.000878537	0.000752479	0.000660128	0.00113917	0.000698886	0.000631585	0.000824817	0.000320847	0.000633114	0.000790038	0.000520517	0.000693388	0.000554443
K00768_nicotinate-nucleotide--dimethylbenzimidazole	0	9.46e-06	1.25e-05	0	6.61e-06	2.2e-05	5.94e-06	9.3e-06	1.77e-05	2.55e-05	1.94e-05	1.77e-05	2.74e-05	8.42e-06	9.33e-06	8.12e-06	9.3e-06	0	2.47e-05	2.99e-05	2.57e-05	0	2.39e-05	0	1.07e-05	2.2e-05	5.65e-05	6.74e-05	2.18e-05	0	1.18e-05	2.81e-05	1.01e-05	2.51e-05	6.73e-06	2.06e-05	1.44e-05	1.15e-05	1.23e-05	0	0	6.13e-06	0	6.61e-06	0	3.48e-05	2.54e-05	0
K00769_xanthine_phosphoribosyltransferase	1.19e-05	5.33e-06	9.32e-06	0	0	0	0	0	0	0	0	0	0	1.87e-05	0	0	9.88e-06	1.18e-05	0	1.39e-05	0	0	1.35e-05	0	0	0	0	0	2.41e-06	0	1.17e-05	1.16e-06	0	0	0	0	1.89e-05	0	1.32e-05	0	0	0	0	1.4e-05	0	0	0	0
K00770_1,4-beta-D-xylan_synthase	0	0	0	0	0	0	0	0	0	0	0	0	0	0	0	0	0	0	0	0	0	0	0	0	0	0	0	0	0	0	0	0	0	0	0	0	0	1.71e-06	0	0	0	0	0	0	0	0	0	0
K00771_protein_xylosyltransferase	0	0	0	0	0	0	0	0	0	0	0	0	0	0	0	0	0	0	0	0	0	0	0	0	0	0	0	0	0	0	0	0	0	0	0	0	0	0	0	0	0	0	0	0	0	0	5.45e-07	0
K00772_5'-methylthioadenosine_phosphorylase	1.54e-05	6.47e-06	2.84e-05	0	8.95e-06	1.11e-05	7.34e-06	6.06e-06	0	0	1.2e-05	8.06e-06	4.15e-06	0	0	0	1.99e-05	1.49e-05	0	0	2.74e-05	0	1.6e-05	9.29e-06	0	0	5.22e-06	1.97e-05	1.24e-05	1.14e-05	9.65e-06	4.21e-06	0	1.61e-05	1.32e-06	6.39e-06	6.57e-06	0	0	8.67e-06	0	1.68e-05	0	1.75e-05	0	0	3.9e-05	0
K00773_queuine_tRNA-ribosyltransferase	0.00260096	0.00239646	0.0028146	0.00273136	0.00262423	0.00292992	0.00285067	0.00289005	0.00318476	0.00284498	0.00274188	0.00282258	0.00248356	0.00285554	0.00264129	0.0033027	0.00282864	0.00269978	0.00277914	0.00260234	0.00285231	0.0030736	0.00277688	0.00309402	0.0027283	0.00278524	0.00269617	0.00255508	0.00277549	0.00273601	0.00268338	0.00283978	0.00281962	0.00272279	0.00286065	0.00276945	0.00269616	0.00296616	0.00244043	0.00256409	0.00316684	0.00289488	0.00300018	0.00279354	0.00274206	0.00281394	0.00267993	0.00286812
K00775_NAD(P)-arginine_ADP-ribosyltransferase	0	0	0	0	0	0	0	0	0	0	0	0	0	0	1.22e-05	0	0	0	0	0	0	0	7.8e-06	0	0	0	0	0	0	0	0	1.32e-06	0	0	0	0	0	0	0	0	0	0	0	0	0	0	1.53e-06	0
K00777	0	0	0	0	0	0	0	0	0	0	0	0	0	0	0	0	0	0	0	0	0	0	0	0	0	0	0	0	0	0	0	0	0	0	0	0	0	0	0	0	0	0	0	0	0	0	0	2.37e-06
K00779_beta-galactoside_alpha2,6-sialyltransferase_(sialyltransferase_2)	0	0	0	0	0	0	0	0	0	0	0	0	0	0	6.36e-06	0	0	0	0	0	0	0	0	0	0	0	0	0	0	0	0	0	0	0	0	0	0	0	0	0	0	0	0	0	0	0	9.03e-07	0
K00780_beta-galactoside_alpha-2,3-sialyltransferase_(sialyltransferase_4A)	0	0	0	0	0	0	0	0	0	0	0	0	0	0	0	0	4.85e-06	0	0	0	0	0	0	0	0	0	0	0	0	0	0	0	0	0	0	0	0	0	0	0	0	0	0	0	0	0	1.47e-06	0
K00781_N-acetyllactosaminide_alpha-2,3-sialyltransferase_(sialyltransferase	0	0	0	0	0	0	0	0	0	0	0	0	0	0	2.23e-05	0	0	0	0	0	0	0	0	0	0	0	0	0	0	0	0	0	0	0	0	0	0	0	0	0	0	0	0	0	0	0	0	0
K00782_hypothetical_protein	8.82e-06	5.73e-06	4.86e-05	0	1.78e-05	6.72e-06	0	1.53e-05	0	0	0	0	1.67e-05	0	1.71e-05	0	8.36e-06	9.98e-06	1.35e-05	3.1e-05	1.18e-05	0	2.09e-05	0	0	0	2.51e-05	0	2.11e-05	1.53e-05	2.81e-05	1.37e-05	4.21e-06	7.12e-06	6.63e-06	1.87e-05	5.87e-05	2.09e-05	7.85e-05	8.94e-06	0	1.74e-05	0	1.16e-05	5.9e-06	0	1.02e-05	1.07e-05
K00783_hypothetical_protein	0.000429843	0.00069519	0.000410723	0.000181112	0.000278801	0.000406376	0.000279185	0.00067847	0.00037125	0.000798241	0.000377724	0.00057575	0.00043542	0.000110782	0.000374477	0.000150871	0.00022073	0.000553459	0.000302254	0.000351322	0.000466436	0.000366678	0.00031938	0.000227428	0.000488756	0.000579613	0.000403276	0.000418778	0.000561273	0.000630177	0.000319618	0.000672723	0.000386411	0.000654527	0.000483063	0.000224089	0.000266257	0.000289657	0.000212488	0.000371711	0.000325441	0.000353108	0.000672751	0.000294096	0.00051006	0.000717468	0.000300051	0.000555208
K00784_ribonuclease_Z	0.000458095	0.0001428	0.000326524	0.000251113	0.000359459	0.000233418	9.72e-05	0.000194643	0.000174506	0.000285531	0.000160972	0.000286141	0.000414908	0.000274515	0.000545558	0.000414351	0.000661889	0.000210993	0.000441891	0.000498135	0.00048112	0.000245608	0.000356538	0.000684129	0.00021356	0.000249332	0.000344268	0.000274892	0.000224272	0.000413767	0.000254811	0.000303968	0.00039141	0.000270958	0.000186466	0.000263086	0.000356628	0.000371576	0.000653648	0.000179958	0.000377016	0.00024558	9.82e-05	0.000388705	0.000275279	0.000132579	0.000340426	0.000240404
K00785_beta-galactosamide-alpha-2,3-sialyltransferase	0	0	2.55e-07	0	0	0	0	0	0	0	0	0	0	0	0	0	0	0	0	0	0	0	0	0	0	0	0	0	0	0	0	0	0	0	0	0	0	0	0	0	0	0	0	0	0	0	0	0
K00786	0	3.5e-06	0	9.5e-06	0	6.06e-06	0	6.93e-06	0	7.71e-06	0	0	2.69e-06	0	0	3.32e-05	5.64e-06	1.55e-06	2.69e-06	8.77e-06	0	3.51e-05	0	0	0	2.78e-06	0	0	1.77e-06	0	3.72e-06	1.09e-05	3.82e-06	8.69e-06	4.18e-06	0	0	0	1.85e-05	0	0	0	0	9.38e-06	0	5.21e-06	2.1e-06	0
K00787_dimethylallyltranstransferase	0	0	0	0	0	0	0	9.18e-06	0	0	0	0	0	0	8.86e-06	0	0	0	0	0	0	0	0	0	0	0	0	0	0	0	0	0	0	0	0	0	0	0	0	0	0	0	0	0	0	0	0	0
K00788_thiamine-phosphate_pyrophosphorylase	6.06e-05	2.33e-05	3.75e-05	2.15e-05	3.28e-05	1.03e-05	0	0	0	4.1e-06	1.66e-05	2.02e-05	8.6e-05	1.46e-05	3.18e-05	1.78e-05	7.81e-05	2.61e-05	2.93e-05	3.5e-05	3.29e-05	2.46e-05	5.11e-05	0.00010136	5.69e-05	5.4e-05	6.18e-05	2.15e-05	4.25e-05	9.76e-05	2.78e-05	3.6e-05	4.91e-05	2.92e-05	1.78e-05	4.28e-06	0.000127252	7.42e-05	0.000147304	2.4e-05	4.46e-05	3.87e-05	1.44e-05	6.52e-05	3.94e-05	1.77e-05	5.63e-05	1.74e-05
K00789_S-adenosylmethionine_synthetase	0.00254076	0.00213815	0.00282516	0.00270076	0.00286408	0.00291896	0.00272224	0.00211506	0.00310779	0.00240598	0.00265561	0.00225535	0.00207545	0.00310604	0.00316181	0.00294535	0.00321338	0.00269898	0.00314134	0.00252644	0.00266008	0.00339202	0.0028668	0.00281363	0.00274585	0.00216659	0.00202732	0.00255113	0.00232281	0.0027099	0.00282172	0.00227908	0.00275218	0.00247549	0.00271694	0.00295977	0.00311532	0.00361974	0.00265849	0.00289049	0.00317526	0.00273641	0.00238707	0.00262079	0.00242347	0.00251538	0.00298921	0.00259837
K00790_UDP-N-acetylglucosamine_1-carboxyvinyltransferase	0.0010487	0.00123478	0.00104514	0.00107346	0.0010779	0.00106295	0.00148089	0.001242	0.00118183	0.00130488	0.00144198	0.00120581	0.00123217	0.00112048	0.00114083	0.000727903	0.0010844	0.00122253	0.00109762	0.00136469	0.00138957	0.00110467	0.00121957	0.00115291	0.00111755	0.00119414	0.00123332	0.00119426	0.00143272	0.00104471	0.00100274	0.00138969	0.00109892	0.00139838	0.00133968	0.000994627	0.00111073	0.00111966	0.000886437	0.000963056	0.000798174	0.000950389	0.00122385	0.000998186	0.00104598	0.00158055	0.000977058	0.00113878
K00791_tRNA_delta(2)-isopentenylpyrophosphate_transferase	0.000493158	0.000728817	0.000461946	0.000182518	0.00040365	0.000480583	0.000269043	0.000613469	0.000543772	0.00057278	0.000334854	0.00056406	0.000632288	0.000195352	0.000517619	0.000140826	0.000451111	0.000391472	0.000384334	0.000506718	0.000484007	0.000468824	0.000297653	0.000302168	0.000517128	0.000587055	0.000660368	0.000442248	0.000608827	0.000553586	0.000358945	0.000624466	0.000586554	0.000570733	0.000478846	0.000375326	0.00042998	0.000348892	0.000363495	0.000353829	0.000276034	0.000321507	0.000630311	0.000410407	0.000545237	0.000578412	0.000332017	0.000575282
K00793_riboflavin_synthase_alpha_chain	0.000288421	7.19e-05	0.000257854	0.000248754	0.000250726	0.000164525	0.000340748	0.000189852	8.51e-05	0.000272464	6.92e-05	0.00017033	0.000639992	9.09e-05	0.00073873	0.000313972	0.000723336	0.000107109	0.000480965	0.000379658	0.000264696	0.00015158	0.000278474	0.000488784	0.000153769	0.000333633	0.000546971	0.000331809	0.000312088	0.000164443	0.000192734	0.000215613	0.000277611	0.000295383	9.41e-05	0.000278424	0.00034498	0.00031141	0.000454096	0.000176893	0.000218841	0.000166045	7.36e-05	0.000182153	0.00028604	0.000184398	0.000333482	0.000220028
K00794_riboflavin_synthase_beta_chain	0.00079005	0.000669341	0.000921156	0.00109153	0.000675568	0.000933392	0.00102406	0.000936325	0.000490774	0.000771604	0.000513458	0.000925176	0.00173612	0.000598386	0.00148148	0.000736429	0.00140456	0.000654499	0.00144221	0.000707137	0.000918325	0.000500445	0.00087941	0.00155107	0.000920634	0.00108396	0.00151806	0.000994953	0.00114395	0.00075313	0.000566979	0.000931913	0.00082574	0.000978068	0.000629899	0.000987447	0.00112168	0.000908258	0.00174768	0.000484292	0.00128004	0.000692157	0.000423642	0.000862632	0.000812657	0.000889095	0.000922599	0.000541072
K00795_geranyltranstransferase	4.08e-05	4.49e-05	6.51e-05	0.000127075	8.55e-05	4.46e-05	4.49e-05	3.1e-05	1.81e-05	4.06e-05	8e-05	3.54e-05	1.62e-05	5.54e-06	2.78e-05	5.18e-05	6.06e-05	9.75e-05	4.59e-05	3.81e-05	7.49e-05	5.06e-05	9.45e-05	7.1e-05	0.000100634	2.6e-05	2.2e-05	9.69e-05	3.12e-05	3.67e-05	6.45e-05	3.82e-05	2.24e-05	3.85e-05	3.95e-05	4.41e-05	9.1e-05	0.000117002	8.81e-05	5.02e-05	0.000107921	8.55e-05	4.62e-05	8.31e-05	4.3e-05	1.26e-05	5.11e-05	4.92e-05
K00796_dihydropteroate_synthase	0.00014508	0.00042575	0.000164591	3.15e-05	8.65e-05	0.000141579	7.97e-05	0.000226428	0.000167595	0.00026013	0.000142367	0.000275041	0.000104384	1.04e-05	5.8e-05	0	1.16e-05	0.000216058	2.44e-05	0.000224156	0.0001265	0.000101954	8.85e-05	8.48e-05	0.000205556	0.000226812	9.43e-05	0.000194319	0.000210014	0.000204446	8.92e-05	0.000206763	0.00016154	0.000187681	0.000160817	2.8e-05	3.64e-05	6.25e-05	2.36e-05	9.42e-05	5.44e-05	0.000113738	0.000365599	7.08e-05	0.000176312	0.000223557	7.79e-05	0.000251005
K00797_spermidine_synthase	0.000321661	0.000243515	0.000472767	0.000599547	0.000410021	0.000218285	0.000170612	0.000320058	0.000119371	0.000171849	0.000340933	0.00039109	0.000205211	0.000127643	0.000467183	0.000277128	0.000166844	0.000554975	0.000439715	0.000354909	0.000316077	0.000361584	0.000459799	0.000195059	0.000471993	0.000168232	0.000275282	0.000413719	0.000333901	0.000285825	0.000207551	0.000338951	0.000378978	0.000192015	0.000252544	0.000361647	0.000247168	0.000453111	0.000709738	0.00016752	0.000218429	0.000409524	0.000311631	0.000604936	0.00044317	0.000334894	0.000565529	0.000464991
K00798_cob(I)alamin_adenosyltransferase	1.11e-05	0	0	0	1.13e-05	0	5.33e-06	0	0	0	1.72e-05	0	0	0	0	0	2.48e-05	1.02e-05	0	3.27e-05	0	0	1.06e-05	0	7.91e-06	5.9e-06	0	2.57e-05	2.05e-06	0	1.1e-05	4.81e-06	7.96e-06	3.65e-06	2.09e-06	6.79e-06	0	0	0	0	0	2.24e-05	0	2.52e-05	1.39e-05	0	5.1e-06	3.78e-05
K00799_glutathione_S-transferase	0	0	0	0	9.8e-06	0	0	3.85e-06	0	0	1.71e-05	0	0	1.3e-05	1.23e-05	0	2.91e-05	0	1.62e-05	0	1.08e-05	0	2.1e-05	0	0	5.47e-06	0	0	7.67e-06	0	2.67e-05	1.45e-05	7.78e-06	0	1.4e-06	4.3e-06	3.27e-05	1.45e-05	9.9e-06	1.18e-05	1.91e-05	3.33e-05	0	0	5.39e-06	0	9.2e-06	9.21e-06
K00800_3-phosphoshikimate_1-carboxyvinyltransferase	0.000181667	0.000485756	0.000180518	4.5e-05	0.0001443	0.000196304	8.04e-05	0.000368166	0.000309732	0.000301629	0.000207074	0.000319882	0.000178	4.82e-05	0.00010494	4.49e-05	1.17e-05	0.000251507	4.48e-05	0.000221642	0.000204234	0.000201177	0.000100075	5.51e-05	0.000265833	0.000291853	0.000187398	0.000207956	0.000260417	0.00030694	0.000112218	0.000328455	0.000184709	0.000315826	0.000302794	8.29e-05	4.27e-05	0.000131522	6.21e-05	0.000233203	2.67e-05	0.000151351	0.000382866	8.16e-05	0.000236478	0.000346515	9.09e-05	0.000260445
K00801_farnesyl-diphosphate_farnesyltransferase	1.29e-05	7.7e-06	0	6.86e-06	5.62e-06	1.09e-05	0	2.52e-05	3.87e-05	1.1e-05	0	0	9.97e-06	9.16e-06	2.04e-05	0	9.93e-06	1.19e-05	5.41e-06	0	6.99e-06	3.05e-05	0	1.57e-05	1.08e-05	2.05e-05	6.37e-06	1.58e-05	0	9.08e-06	1.7e-06	2.86e-06	1.65e-05	1.26e-05	7.15e-06	1.1e-05	0	0	0	0	1.2e-05	1.33e-05	4.54e-05	0	3.4e-06	0	4.52e-06	6.35e-06
K00803_alkyldihydroxyacetonephosphate_synthase	2.95e-05	4.63e-05	3.83e-05	2.75e-05	2.78e-05	1.86e-05	5.18e-05	2.3e-05	4.41e-05	3.47e-05	4.23e-05	2.2e-05	6.06e-06	3.67e-05	5.23e-05	0.000109377	6.53e-05	3.39e-05	5.3e-05	4.78e-05	3.2e-05	0.00010895	8.18e-05	4.23e-05	4.87e-05	3.13e-05	2.06e-05	2.7e-05	1.07e-05	6.76e-05	6.99e-05	1.3e-05	8.83e-05	2.07e-05	6.77e-05	5.17e-05	3.79e-05	0.000130777	5.37e-05	7.39e-05	0.000151168	4.58e-05	7.76e-05	8.33e-05	3.89e-05	2.78e-05	5e-05	7.64e-05
K00805_trans-hexaprenyltranstransferase	0	1.1e-05	2.17e-05	6.46e-06	1.33e-05	8.42e-06	0	9.86e-06	0	3.1e-05	2.03e-05	0	3.68e-05	0	0	0	1.42e-05	0	2.07e-05	0	1.34e-05	3.69e-05	1.25e-05	1.42e-05	1.47e-05	6.43e-06	1.19e-05	0	4.64e-06	1.75e-05	8.16e-06	2.19e-06	1.33e-05	8.09e-06	1.53e-05	2.65e-05	1.89e-05	1.09e-05	1.29e-05	1.46e-05	1.16e-05	6.55e-06	1.74e-05	2.45e-05	1.27e-05	0	8.7e-06	2.43e-05
K00806_undecaprenyl_pyrophosphate_synthetase	0.0013283	0.00156469	0.00137274	0.00105662	0.00119046	0.00143242	0.00135964	0.0016198	0.00132412	0.0016023	0.00119112	0.00170811	0.00186871	0.000832123	0.00169248	0.00110615	0.00160584	0.00128672	0.00151468	0.0014336	0.0015263	0.00113479	0.00134256	0.00137518	0.00130445	0.00175602	0.00193022	0.0013707	0.00179273	0.00147553	0.0010949	0.00160392	0.00148605	0.00158753	0.00149838	0.00140921	0.00124236	0.00135367	0.00152101	0.00141817	0.00127655	0.00141811	0.00141153	0.00150617	0.00163301	0.00185433	0.00133181	0.00131755
K00808_homospermidine_synthase	0	0	0	0	0	0	0	0	0	0	0	0	0	0	0	0	0	0	0	0	0	0	0	0	0	0	0	0	8.59e-07	0	1.77e-06	0	0	0	0	1.89e-06	0	0	0	0	0	4.58e-06	0	0	0	0	0	0
K00809_deoxyhypusine_synthase	5.64e-05	5.84e-05	0.000390435	6.14e-05	0.000150248	0.000286265	6.44e-05	0.000164831	0.000471894	0.000212052	8.51e-05	0.000152635	2.74e-05	0.000129241	7.16e-05	0.000268058	5.48e-05	0.000311109	6.52e-05	8.32e-05	0.000156998	0.00045891	0.000203201	9.61e-05	0.000205881	3.36e-06	3.24e-05	1.56e-05	0.000133351	9.31e-06	0.000337644	6.18e-05	8.96e-05	0.000159788	0.000176282	0.000430988	0.000326316	5.27e-06	4.04e-05	0.000195713	0.000167158	0.000255053	0.000425843	0.000111568	0.000102657	0.000113743	0.000163413	0.000282623
K00811_aspartate_aminotransferase	0.000991232	0.000251129	0.000743438	0.00164089	0.000844089	0.00115998	0.000872022	0.0010229	0.00045798	0.000679763	0.000804257	0.000749173	0.00193487	0.000826139	0.00141925	0.000799877	0.00123291	0.000661699	0.00135315	0.000961694	0.00096017	0.000554892	0.000994133	0.00124716	0.000511885	0.00115255	0.00168581	0.000999589	0.0012585	0.000608974	0.000784344	0.000864771	0.00101759	0.000870324	0.000669266	0.0012532	0.00131484	0.000888382	0.00164813	0.00114539	0.000856037	0.000634479	0.000292579	0.00077282	0.00112519	0.000572249	0.00103923	0.000578831
K00812_aspartate_aminotransferase	0.00068854	0.000161969	0.000376849	0.000996921	0.000339065	0.000590099	0.000442763	0.000511871	0.000252542	0.000395566	0.000394077	0.000429159	0.000994688	0.000443584	0.000966744	0.000389158	0.000829959	0.000351245	0.000677188	0.000515216	0.000634749	0.000336682	0.000645673	0.000786032	0.000398961	0.000829992	0.00108181	0.00102116	0.000717485	0.000364703	0.000360689	0.000501658	0.000640513	0.000605853	0.000324197	0.000716099	0.000638135	0.000440608	0.00115415	0.000489053	0.000351773	0.000437604	0.0001811	0.000539637	0.000744217	0.000386617	0.00058176	0.000297622
K00813_aspartate_aminotransferase	0	0	3.64e-06	0	1.15e-05	1.81e-06	0	4.16e-06	0	0	0	0	0	0	0	0	4.16e-06	9.9e-06	1.34e-05	0	5.01e-06	0	1.09e-05	0	9.67e-06	5.72e-06	3.54e-06	0	0	0	9.75e-06	1.89e-06	0	0	0	0	8.53e-06	0	0	0	1.01e-05	0	0	0	0	0	0	0
K00814_alanine_transaminase	0	0	0	0	0	0	0	0	0	0	0	0	0	0	0	0	9.14e-06	0	0	0	0	0	0	0	0	0	0	0	8.52e-07	0	0	0	0	0	0	0	0	0	0	0	0	0	0	0	0	0	1.81e-06	0
K00815_tyrosine_aminotransferase	0	0	0	0	0	0	0	0	0	0	0	0	0	0	0	0	0	4.35e-06	0	0	0	0	0	0	0	0	0	0	0	0	0	0	0	0	0	0	0	0	0	0	0	0	0	0	0	0	0	0
K00817_histidinol-phosphate_aminotransferase	0.000376311	0.000755949	0.000382655	0.000112907	0.000356891	0.000347864	0.00026762	0.000556971	0.00049882	0.000559048	0.000289977	0.000576312	0.000412905	0.000124502	0.000285219	0.000189696	0.00021524	0.000532656	0.000199613	0.000388195	0.000370574	0.000304877	0.000290233	0.000326297	0.000518743	0.000507372	0.000471083	0.000592531	0.000558323	0.000544298	0.000267175	0.00062155	0.000464875	0.000566317	0.000552441	0.000281787	0.00021854	0.000243198	0.000341373	0.000398601	0.00022847	0.000479587	0.000595217	0.000463527	0.000545058	0.00073272	0.000281864	0.000619405
K00818_acetylornithine_aminotransferase	0.000627094	0.000807705	0.000643149	0.000568635	0.00053485	0.000847466	0.000661355	0.00081686	0.00063899	0.000826737	0.000636685	0.000697603	0.000998783	0.000507056	0.000714038	0.00033472	0.000623975	0.00068307	0.000589494	0.000554619	0.000632896	0.000741156	0.000726218	0.000668382	0.000646177	0.000859135	0.00107138	0.000677164	0.000915983	0.000505959	0.000589139	0.000756683	0.00070116	0.000771202	0.000667673	0.000694832	0.000611815	0.000561519	0.000771866	0.000832618	0.000520548	0.000541388	0.000620495	0.000507197	0.000814458	0.000888499	0.000558174	0.000501729
K00819_ornithine--oxo-acid_transaminase	0	0	3.64e-06	0	0	1.55e-06	0	0	0	0	7.56e-06	0	0	0	0	0	4e-06	4.24e-06	0	5.14e-06	5.57e-06	6.13e-06	0	0	0	0	1.49e-06	5.34e-06	0	0	1.25e-06	6.63e-07	0	0	1.46e-06	0	0	0	1.64e-05	0	9.66e-06	0	0	0	0	0	5.1e-07	4.42e-06
K00820_glucosamine--fructose-6-phosphate_aminotransferase_(isomerizing)	0.000816383	0.000941278	0.000814577	0.00134082	0.000890702	0.000962864	0.00131993	0.00102163	0.000908977	0.000823218	0.000905101	0.000825984	0.00096323	0.00102679	0.00105054	0.00069524	0.000870524	0.000899671	0.000888913	0.00103737	0.000952545	0.000836725	0.000923642	0.000824207	0.000927363	0.000930184	0.000933311	0.000986466	0.000850578	0.000848266	0.000852876	0.00103114	0.000943911	0.000970193	0.000976296	0.000876691	0.00107064	0.000965015	0.000742855	0.000769878	0.00082649	0.00081229	0.000738817	0.000716217	0.000732289	0.000980315	0.000974668	0.000910696
K00821_acetylornithine/N-succinyldiaminopimelate_aminotransferase	0.00019571	0.000258883	0.00030048	0.000227322	0.000256389	0.000138038	0.000143942	0.000111964	0.000180625	0.000382532	0.00026229	0.000276109	0.000234375	0.000181387	0.000209975	0.000445318	0.000206515	0.000375548	0.000328825	0.000265181	0.000297275	0.000291515	0.000139367	0.000257547	0.000376175	0.00023752	0.000240953	0.000297915	0.000222892	0.000360709	0.00015181	0.000453504	0.000419918	0.000283283	0.000256856	0.000173386	0.000240681	0.000253917	0.000704662	0.000257699	0.000335968	0.000335609	0.000200872	0.000600748	0.000274315	0.000108029	0.000208281	0.000368695
K00822_beta-alanine--pyruvate_transaminase	0	0	3.34e-06	5e-06	0	0	4.8e-06	0	0	0	0	0	0	0	0	0	0	0	0	0	0	0	0	0	0	0	0	0	9.31e-07	0	6.31e-07	8.4e-07	0	0	0	1.95e-06	3.77e-06	0	0	0	0	0	0	0	0	0	1.12e-06	0
K00823_4-aminobutyrate_aminotransferase	1e-05	5e-06	3.01e-05	1.07e-05	5.38e-06	6.62e-06	0	0	0	0	8.18e-06	4.97e-06	2.58e-06	1.42e-05	0	9.3e-06	3.74e-06	4.59e-06	4.19e-06	4.98e-06	1.09e-05	0	0	0	4.51e-06	0	0	0	4.86e-06	7.08e-06	1.17e-05	8.57e-06	1.7e-05	9.73e-06	9.52e-06	0	3.96e-06	0	5.2e-06	0	9.44e-06	5.19e-06	0	5.32e-06	1.06e-05	0	1.08e-06	4.95e-06
K00824_D-alanine_transaminase	1.5e-05	3.01e-06	1.58e-05	0	3.27e-05	5.09e-06	1.51e-05	0	0	0	1.25e-05	1.52e-05	0	1.08e-05	0	4.23e-05	1.75e-05	2.77e-05	6.37e-06	1.51e-05	8.28e-06	0	7.67e-06	8.76e-06	1.36e-05	1.21e-05	2.5e-06	1.84e-05	1.47e-06	0	2.5e-05	4.02e-06	0	4.96e-06	1.32e-05	1.94e-05	1.21e-05	5.08e-05	1.58e-05	4.49e-05	1.42e-05	2.36e-05	0	8e-06	1.6e-05	8.82e-06	5.34e-06	1.49e-05
K00825_2-aminoadipate_transaminase	0	0	0	0	0	0	0	0	0	0	0	0	0	0	0	0	0	0	0	0	0	0	0	0	2.26e-06	0	0	0	0	0	0	0	0	0	0	0	0	0	0	0	0	0	0	0	0	0	0	0
K00826_branched-chain_amino_acid_aminotransferase	0.00162291	0.00164109	0.00146794	0.00220017	0.00147998	0.00183598	0.0015159	0.00201941	0.00146368	0.0016856	0.00190307	0.00181977	0.0025078	0.00162457	0.00214024	0.00162125	0.00175217	0.00149989	0.0020885	0.00148856	0.00156649	0.00131955	0.00163169	0.0017123	0.00159084	0.00193241	0.00232827	0.00152321	0.00205685	0.00152434	0.00141392	0.00199635	0.00216404	0.00213563	0.00175696	0.00168015	0.0017092	0.00172723	0.002735	0.00170781	0.00206841	0.00164734	0.00138736	0.00201918	0.00193538	0.00178245	0.00172773	0.00155975
K00827_alanine--glyoxylate_transaminase	0	0	0	4.43e-06	0	0	0	0	0	0	0	0	0	0	0	0	0	0	0	0	0	0	0	0	0	0	0	0	0	0	0	0	0	0	0	0	0	0	0	0	0	0	0	0	0	0	0	0
K00830_serine--pyruvate_aminotransferase	0	0	0	0	0	0	0	4.21e-06	0	0	0	0	0	0	0	0	4.21e-06	0	0	0	5.82e-06	0	0	0	3.19e-06	0	0	1.12e-05	0	0	0	4.64e-07	0	1.77e-06	1.65e-06	2.29e-06	0	0	0	0	1e-05	0	7.72e-06	0	0	0	1.21e-06	1.06e-05
K00831_phosphoserine_aminotransferase	0.000976875	0.00111409	0.0012061	0.00166557	0.00122143	0.00130327	0.0014407	0.00117962	0.00108717	0.00123424	0.0011333	0.0010718	0.00118314	0.00106634	0.00115804	0.00148568	0.000916316	0.00111654	0.00129487	0.00137268	0.00130423	0.001192	0.000944497	0.00114731	0.00135751	0.000982071	0.000964731	0.00121513	0.00102172	0.0013095	0.000915747	0.00130947	0.00117936	0.00136682	0.00141272	0.000933258	0.00112478	0.001081	0.00103403	0.0011165	0.00136116	0.00120017	0.0011232	0.00138938	0.000976692	0.00126671	0.00131758	0.00109556
K00832_aromatic-amino-acid_transaminase	0	0	0	0	0	0	0	7.97e-06	0	0	0	5.36e-06	0	0	0	0	0	4.74e-06	4.34e-06	5.13e-06	5.64e-06	0	0	0	3.22e-06	0	0	0	0	0	8.97e-06	6.64e-06	0	0	2.54e-06	2.21e-06	4.07e-06	5.06e-06	0	6.14e-06	1.97e-05	5.47e-06	0	0	0	0	0	0
K00833_adenosylmethionine-8-amino-7-oxononanoate_aminotransferase	9.74e-05	2.5e-05	8.49e-05	0.000113205	0.000204678	9.97e-05	0.000195527	7.35e-05	0.000249616	2.57e-05	0.000145834	3.87e-05	2.67e-05	0.000362671	3.27e-05	0.000124486	6.89e-05	7.25e-05	5.16e-05	9.07e-05	9.54e-05	5.59e-05	9.51e-05	0.000140716	0.000108295	3.32e-05	2.53e-05	0.000108468	7.5e-05	4.39e-05	0.000367474	3.12e-05	0.000134908	5.27e-05	8.45e-05	0.000151196	0.000106535	0.000136818	7.07e-05	0.000198958	0.000196369	0.000219427	4.81e-05	0.000101422	0.000193007	1.86e-05	0.000161208	5.15e-05
K00835_valine--pyruvate_aminotransferase	0	9.4e-07	0	0	5.46e-06	0	0	0	0	0	0	0	0	0	0	0	0	0	8.13e-06	0	0	0	0	0	0	0	0	0	0	0	3.76e-06	4.28e-06	0	0	0	0	0	0	0	5.58e-06	0	0	0	0	0	0	0	0
K00836_diaminobutyrate-2-oxoglutarate_transaminase	4.7e-06	3.01e-06	1.65e-05	1.04e-05	2.07e-05	8.14e-06	0	3.67e-06	5e-06	8.07e-06	7.85e-06	0	0	4.01e-05	7.52e-06	9.43e-06	0	2.18e-05	1.19e-05	4.69e-06	5.41e-06	0	9.49e-06	5.84e-06	1.17e-05	2.45e-06	6.29e-06	0	2.92e-06	2.14e-05	8.04e-06	7.47e-06	1.46e-05	2.4e-05	1.47e-05	3.98e-06	3.38e-05	0	5.14e-06	1.72e-05	8.79e-06	2.48e-05	0	5.32e-06	1.01e-05	2.77e-06	6.7e-06	1.4e-05
K00837	0.000187856	6.76e-05	0.000103163	0.000427399	0.000199244	0.000299171	0.000124457	0.000137566	7.32e-05	8.43e-05	0.000158963	0.000126461	0.000273228	0.000267267	0.000230833	9.13e-05	0.000161537	9.24e-05	0.000182829	0.000142128	0.000144855	0.000142596	0.000220497	0.000218298	0.000102989	0.000119612	0.000152919	7.89e-05	0.000157631	0.000111015	0.000140093	0.000113046	0.000110482	9.27e-05	0.000127279	0.000132991	0.000257469	0.000237573	0.000196825	0.000273537	0.000180254	0.000174925	0.000100789	0.000204591	0.00014552	0.000132076	0.000219555	0.000106808
K00838_aromatic_amino_acid_aminotransferase_I	0	0	0	0	0	0	0	0	0	0	0	0	0	0	0	7.94e-06	0	0	0	0	0	0	0	0	0	0	0	0	0	0	0	0	0	0	0	1.68e-06	0	0	0	0	0	0	0	0	0	0	0	0
K00839_aminotransferase	4.49e-05	4.52e-05	5.06e-05	2.39e-05	3.02e-05	5.28e-05	0	5.49e-05	5.34e-05	3.12e-05	3.69e-05	2.79e-05	3.46e-05	1.6e-05	8.84e-05	4.22e-05	4.33e-05	6.45e-05	2.81e-05	3.95e-05	3.65e-05	4.64e-05	3.68e-05	6.97e-05	4.37e-05	5.05e-05	3.7e-05	2.73e-05	9.63e-06	4.75e-05	1.25e-05	1.84e-05	6.22e-05	2.29e-05	4.53e-05	6.43e-05	4.21e-05	2.14e-05	5.84e-06	2.65e-05	2.62e-05	4.69e-05	8.69e-05	1.5e-05	2.67e-05	2.61e-05	3.48e-05	2.22e-05
K00840_succinylornithine_aminotransferase	0	0	0	0	0	0	0	0	0	0	0	0	0	0	0	0	0	0	1.32e-05	0	0	0	0	0	3.02e-06	0	0	0	0	0	4.62e-06	1.4e-06	0	0	0	0	0	0	0	1.24e-05	0	0	0	0	0	0	0	0
K00841_aminotransferase	1.65e-05	1.43e-05	3e-05	1.77e-05	6.02e-06	5.64e-06	0	2.18e-05	1.68e-05	4.79e-06	9.17e-06	2.23e-05	8.62e-06	0	8.81e-06	1.01e-05	8.62e-06	0	0	1.08e-05	6.07e-06	6.61e-06	2.26e-05	0	0	1.46e-05	1.27e-05	2.72e-05	1.09e-06	1.56e-05	2.19e-06	7.29e-06	9.53e-06	3.6e-06	7.98e-06	9.44e-06	8.72e-06	0	2.86e-05	0	2.06e-05	1.16e-05	3.14e-05	5.97e-06	0	0	1.04e-05	1.61e-05
K00842_aminotransferase	3.46e-05	2.42e-05	1.67e-05	5.86e-06	1.19e-05	2.15e-05	1.2e-05	6.44e-06	7.34e-06	5e-05	8.65e-06	2.83e-05	2.81e-05	1.53e-05	2.39e-05	3.27e-05	6.95e-05	2.6e-05	5.11e-05	5.17e-05	4.75e-05	4.61e-05	3.58e-05	7.63e-06	2.84e-05	3.33e-05	3.35e-05	2.62e-05	2.7e-05	2.49e-05	3.04e-05	2.18e-05	4.86e-05	1.95e-05	2.14e-05	2.92e-05	5.87e-05	4.57e-05	6.21e-05	0.000112025	5.95e-05	2.73e-05	2.26e-05	2.45e-05	2.4e-05	4.42e-05	5e-05	5.73e-05
K00844_hexokinase	0	0	1.62e-06	0	0	0	0	0	0	0	0	0	0	0	0	0	0	0	0	0	0	0	0	0	0	0	0	0	0	0	0	0	0	1.48e-06	0	1.02e-06	0	0	0	0	3.72e-06	0	0	0	0	0	1.31e-06	0
K00845_glucokinase	0.000747272	0.000221271	0.000596002	0.000633061	0.000692772	0.00048624	0.00108353	0.000391922	0.000934523	0.000416155	0.000880467	0.000356703	0.000600073	0.00114309	0.000784738	0.000887649	0.000879368	0.000527576	0.000661099	0.000608762	0.000503292	0.000694346	0.000688942	0.00063199	0.000401407	0.000353879	0.000556275	0.000419982	0.000629006	0.000383486	0.00115249	0.000365413	0.000551415	0.000463963	0.000462251	0.000884701	0.000662912	0.000602922	0.000652157	0.000424145	0.000658027	0.00067455	0.000280668	0.000538491	0.000669649	0.000313023	0.000640276	0.000381765
K00847_fructokinase	0.000518094	0.000500926	0.000573006	0.00025787	0.000303152	0.0003168	0.000333516	0.000364953	0.000350765	0.00053259	0.000372955	0.000444866	0.000612716	0.000183215	0.000636337	0.000277545	0.000775005	0.000468043	0.000637526	0.000520734	0.000458411	0.000288873	0.000377213	0.000405503	0.000588315	0.00085392	0.000841435	0.000493677	0.000652896	0.000373767	0.000354403	0.000587823	0.000432978	0.000588255	0.000289478	0.000457266	0.000466969	0.000359198	0.000871217	0.000403832	0.000292	0.000437852	0.000547268	0.000535232	0.000521465	0.000548577	0.00043051	0.000375491
K00848_rhamnulokinase	5.75e-05	4.08e-05	5.38e-05	0.000106722	6.14e-05	0.000117681	8.78e-05	6.47e-05	8.43e-05	9e-05	4.3e-05	5.68e-05	0.000180977	4.34e-05	0.000129611	4.08e-05	0.000107531	2.84e-05	0.000141261	6.13e-05	8.87e-05	5.71e-05	0.000114676	5.5e-05	6.24e-05	8.9e-05	0.00016916	0.000106727	9.23e-05	6.72e-05	7.51e-05	7.29e-05	8.81e-05	0.00010671	4.72e-05	0.000142601	7.32e-05	9.01e-05	0.000123994	5.99e-05	4.92e-05	6.79e-05	6.18e-05	7.9e-05	5.97e-05	5.07e-05	9.06e-05	2.61e-05
K00849_galactokinase	0.00118448	0.00108958	0.00115467	0.00138892	0.00105269	0.00165202	0.00109961	0.00134004	0.00117318	0.00134853	0.00113476	0.00127647	0.00167184	0.00101695	0.00131513	0.000808074	0.00144203	0.00127484	0.00135295	0.0013179	0.00145819	0.000952242	0.00115237	0.00140068	0.00101634	0.00145375	0.00177172	0.0012432	0.00166655	0.00114055	0.00102431	0.00136072	0.00121271	0.00133849	0.00118307	0.00144634	0.0011534	0.000879934	0.00138405	0.00122073	0.000826974	0.000984954	0.00107256	0.0010204	0.00118809	0.00144893	0.000998446	0.00111622
K00850_6-phosphofructokinase	0.0015828	0.000876245	0.00216718	0.00198266	0.00186965	0.00205855	0.00219065	0.00168594	0.00274825	0.00174577	0.00222581	0.00141636	0.00177097	0.00249762	0.00180619	0.00265697	0.00223163	0.00146434	0.00233378	0.0016669	0.00193374	0.00216055	0.00203107	0.00209926	0.00182057	0.00125399	0.00156041	0.00186152	0.00173462	0.00179567	0.0025332	0.00172644	0.00212828	0.00146063	0.00184473	0.00245888	0.00266611	0.00235262	0.00234908	0.00169748	0.00248277	0.00204528	0.00150818	0.00221766	0.00202955	0.00107635	0.00213536	0.00154865
K00851_gluconokinase	0.000131025	0.000400457	9.16e-05	0	0.00015634	5.77e-05	1.2e-05	3.12e-05	2.34e-05	0.000126583	5.87e-05	0.000202611	6.74e-05	1.7e-05	1.88e-05	0	1.15e-05	0.000180666	0	8.34e-05	2.6e-05	5.66e-05	4.94e-05	6.89e-05	0.000114889	0.000127147	9.42e-05	3.92e-05	6.3e-05	0.000203059	2.97e-05	5.05e-05	6.59e-05	3.93e-05	6.63e-05	1.53e-05	0	0	0	0.000140404	0.000112398	4.96e-05	0.000184193	0.000127492	3.78e-05	2.75e-05	3.35e-05	0.000303418
K00852_ribokinase	0.000273456	0.000644993	0.000195169	6.31e-05	0.000197303	0.000161357	5.85e-05	0.000267799	0.000292605	0.000261299	0.000222797	0.000335673	9.74e-05	5.65e-05	8.35e-05	0	5.25e-06	0.000197933	3.27e-05	0.000168944	0.000163072	0.000215777	0.000119092	5.95e-05	0.000203106	0.00031687	0.000191355	0.000127082	0.000208872	0.000255914	0.000108662	0.000272454	0.000226798	0.000248268	0.000248138	5.31e-05	5.12e-06	4.32e-05	0	0.000229355	9.73e-05	8.71e-05	0.000455272	9.7e-05	0.000161521	0.000282573	7.95e-05	0.000236829
K00853_L-ribulokinase	3.83e-06	1.54e-05	8.22e-06	4.17e-05	4.3e-06	1.46e-05	3.8e-06	3.09e-06	0	2.01e-05	0	1.15e-05	0	2.19e-05	6.06e-06	2.86e-05	2.94e-05	6.95e-06	2.22e-05	1.54e-05	1.71e-05	4.53e-06	8.06e-06	1.32e-05	6.99e-06	1.86e-05	3.82e-06	2.87e-05	5.26e-06	1.1e-05	2.19e-05	7.56e-06	6.61e-06	3.86e-06	2.34e-05	1.46e-05	2.75e-05	3.71e-05	3.93e-06	4.68e-06	1.48e-05	1.17e-05	5.4e-06	1.23e-05	4.05e-06	4.53e-06	5.38e-06	3.79e-06
K00854_xylulokinase	0.00067274	0.000600391	0.000882775	0.000672887	0.000550974	0.00079166	0.000491023	0.000921995	0.000812759	0.000945894	0.000548068	0.000670632	0.000772224	0.000413176	0.000800745	0.000588362	0.000685671	0.000781221	0.000850338	0.000708202	0.000736915	0.000584645	0.000708907	0.000623642	0.000758335	0.000758229	0.000745641	0.000758627	0.000809768	0.000699956	0.000577064	0.000937232	0.000731269	0.000851594	0.00065315	0.000803668	0.000702354	0.000612297	0.000958275	0.000615825	0.000630049	0.000727735	0.000682484	0.000698862	0.000716714	0.000820155	0.00068387	0.000654528
K00855_phosphoribulokinase	0	1.37e-06	0	0	0	0	0	0	0	0	0	0	0	0	0	0	0	0	2.36e-05	0	0	0	0	0	0	0	0	0	0	0	8.41e-06	2.47e-06	0	0	0	0	0	0	7.78e-06	8.58e-06	0	0	0	0	3.76e-06	0	0	0
K00856_adenosine_kinase	0	0	0	0	0	0	6.56e-06	0	0	5.63e-06	0	0	0	0	0	0	0	0	0	0	0	0	0	0	0	0	0	1.6e-05	1.29e-06	0	8.71e-07	5.14e-06	0	0	1.04e-06	0	0	0	0	0	0	0	0	0	0	0	1.54e-06	6.49e-06
K00857_thymidine_kinase	0.000554698	0.00013249	0.000383256	0.000513306	0.00028442	0.000448066	0.000714781	0.000496209	0.000166692	0.000156278	0.0003584	0.000246035	0.0010125	0.000422683	0.000842454	0.000474492	0.000904278	0.000188602	0.000801503	0.000566515	0.000414224	0.0002225	0.000639006	0.000610121	0.0002801	0.000478014	0.00074064	0.00033858	0.000492859	0.000495991	0.000369703	0.000373312	0.000499536	0.000396107	0.000140474	0.00030091	0.00059832	0.000541104	0.000792012	0.000126637	0.000439499	0.000339736	4.5e-05	0.000355152	0.000305508	0.000264287	0.000573558	0.00028585
K00858_NAD+_kinase	0.000346957	0.000748615	0.000213878	0.000127431	0.000298364	0.000299464	0.000131045	0.000437332	0.000454062	0.000544585	0.000312902	0.00049111	0.000218843	5.67e-05	0.000114009	2.45e-05	2.21e-05	0.000397911	2.31e-05	0.000230683	0.000317257	0.000280894	0.000140396	9.01e-05	0.000379015	0.000414158	0.000261555	0.00022315	0.000341278	0.000321222	0.000161734	0.000490967	0.000313999	0.000394821	0.000432606	7.56e-05	3.04e-05	0.000183661	8.44e-05	0.000382382	0.000121059	0.000222725	0.000640007	0.000155313	0.0003535	0.000649083	0.000115003	0.000433022
K00859_dephospho-CoA_kinase	6.57e-06	1.06e-05	3.69e-05	0	0	7.01e-06	6.6e-06	2.44e-05	1.09e-05	0	0	1.04e-05	2.27e-05	0	0	0	2.57e-07	0	8.37e-06	0	1.23e-05	0	0	1.25e-05	1.38e-05	5.5e-06	3.42e-06	0	2.24e-05	1.54e-05	1.53e-05	1.11e-05	0	6.79e-06	2.24e-05	4.41e-06	4.44e-07	2.03e-05	0	0	0	9.97e-07	0	1.11e-05	0	6.36e-06	0	1.08e-05
K00860_adenylylsulfate_kinase	2.12e-05	8.45e-06	4.44e-05	0	0	2.13e-05	3.22e-05	1.65e-05	1.06e-05	9.01e-06	3.5e-05	1.05e-05	7.07e-05	0.000195775	1.67e-05	0	8.16e-06	9.73e-06	3.54e-05	0	8.03e-05	5.02e-05	0	2.46e-05	0	1.12e-05	1.4e-05	2.57e-05	7.83e-05	0	5.01e-05	3.65e-05	2.25e-05	1.39e-05	8.39e-06	4.94e-05	1.66e-05	5.04e-05	3.3e-05	4.97e-05	3.97e-05	3.28e-05	0	4.78e-06	4.19e-05	3.06e-05	1.17e-05	3.14e-05
K00861_riboflavin_kinase	0	0	0	0	0	0	0	0	0	0	0	0	0	0	0	0	0	0	0	0	0	0	0	0	5.07e-06	0	0	0	0	0	0	0	0	0	0	0	0	0	0	0	0	0	0	0	0	0	0	0
K00863_dihydroxyacetone_kinase	3.29e-05	3.63e-06	2.46e-05	3.86e-06	1.97e-05	7.19e-06	5.43e-05	1.99e-06	2.85e-05	0	4.89e-05	7.27e-06	0	5.19e-06	3.57e-05	8.43e-07	5.28e-05	0	2.13e-05	1.4e-05	2.21e-05	5.11e-05	2.78e-05	0	2.35e-05	1.08e-06	1.2e-06	0.000119735	1.32e-05	0.000110902	1.49e-05	4.26e-06	6.21e-06	2.78e-07	1.31e-05	3.23e-06	2.41e-05	0	3.42e-05	5.52e-07	8.53e-05	1.94e-05	4.03e-05	4.26e-06	7.7e-06	4.3e-06	1.61e-05	4.27e-05
K00864_glycerol_kinase	0.000529686	0.000642585	0.000924525	0.000750355	0.000713106	0.000804183	0.000583246	0.000500421	0.000768658	0.000775705	0.000707273	0.00077056	0.000353736	0.000729667	0.000788595	0.000944449	0.000681148	0.000730575	0.00085675	0.000659741	0.000653207	0.000914771	0.000809869	0.000675143	0.000944354	0.000727068	0.000376337	0.000925882	0.000509097	0.000566136	0.000767219	0.000604108	0.000811239	0.000545294	0.000883886	0.00106985	0.00103688	0.00123612	0.00120685	0.000812677	0.00108441	0.000898842	0.0010089	0.00123996	0.000580197	0.000604972	0.000883377	0.000903566
K00865_glycerate_kinase	2.71e-05	3.16e-05	5.09e-05	0	3.6e-05	2.59e-05	1.67e-05	3.41e-05	4.47e-05	3.71e-05	2.75e-05	4.48e-05	2.87e-05	1.61e-05	1.8e-05	0	8.67e-06	3.58e-05	4.61e-05	2.75e-05	3.56e-05	3.33e-05	1.11e-05	1.92e-05	2.98e-05	2.32e-05	9.12e-06	4.06e-05	1.91e-05	3.1e-05	3.75e-05	3.29e-05	3.79e-05	2.32e-05	3.26e-05	2.61e-05	3.15e-05	5.43e-06	1.75e-05	1.28e-05	4.17e-05	4.07e-05	2.35e-05	4.74e-05	1.74e-05	2.27e-05	2.08e-05	2.78e-05
K00867_type_I_pantothenate_kinase	6.77e-06	5.5e-06	1.91e-05	0	3.57e-05	2.29e-06	0	0	0	0	9.52e-06	6.95e-06	0	0	0	0	4.9e-06	0	0	3.44e-05	7.45e-06	1.63e-05	0	0	4.07e-06	3.57e-06	6.68e-06	4.81e-05	1.3e-06	0	1.42e-05	2.88e-06	2.86e-06	2.28e-06	6.23e-06	2.91e-06	2.17e-05	0	0	0	4.06e-05	7.11e-06	0	0	0	0	0	2.67e-05
K00868_pyridoxine_kinase	0.000302594	0.000780438	0.000312328	0.000118898	0.000270983	0.000324395	0.000192221	0.000523646	0.000486381	0.000507397	0.000350895	0.000479785	0.000201993	0.000141134	8.18e-05	4.13e-05	2.34e-05	0.000285146	3.76e-05	0.000279436	0.000418936	0.000287607	0.000148147	0.000214593	0.000392809	0.000455219	0.000342045	0.000287726	0.000448689	0.000331727	0.000208031	0.00057072	0.000333126	0.000519271	0.000426	0.000249204	4.83e-05	0.000184482	0.000100907	0.000348285	0.000152529	0.000282908	0.000548131	0.000307832	0.000418227	0.000624153	0.000176535	0.000434976
K00869_mevalonate_kinase	1.46e-05	5.82e-06	0	7.79e-06	0	2.46e-06	0	5.71e-06	0	0	0	0	0	0	0	0	0	0	0	6.78e-06	0	0	0	0	0	0	0	0	1.25e-06	0	9.61e-07	3.24e-06	0	0	0	0	1.16e-05	0	0	0	0	0	0	0	0	0	1.71e-06	1.44e-05
K00870_protein_kinase	9.66e-06	1.8e-05	6.07e-06	0	3.07e-06	6.55e-06	3.94e-06	1.04e-05	1.15e-05	5.51e-06	6.72e-06	6.43e-06	2.9e-06	6.69e-07	1.48e-06	0	0	7.05e-06	0	2.93e-06	5.54e-06	2.62e-06	1.11e-05	1.81e-06	5.65e-06	1.03e-05	7.57e-06	1.96e-06	5.84e-06	9.33e-06	3.91e-06	9.16e-06	1.01e-05	8.29e-06	1.17e-05	1.61e-06	3.72e-07	1.19e-06	0	6.54e-06	0	4.34e-06	9.82e-06	2.54e-06	4.67e-06	1.39e-05	1.67e-06	9.69e-06
K00871_phosphorylase_kinase_gamma_subunit	0	0	0	0	0	0	0	0	0	0	0	0	0	0	0	0	0	0	0	0	0	0	0	0	0	0	0	0	0	0	0	0	0	0	0	0	0	0	0	0	0	0	0	0	0	0	2.08e-06	0
K00872_homoserine_kinase	0.000485588	0.00126212	0.000378313	6.91e-05	0.000372549	0.00050356	0.000211904	0.000808463	0.000575286	0.000855958	0.000482596	0.000769549	0.000269375	8.25e-05	0.000182494	3.71e-05	2.12e-05	0.000643673	5.49e-05	0.00046451	0.000525168	0.000499061	0.000246447	5.39e-05	0.000612695	0.000672441	0.000406476	0.000345739	0.000629108	0.000630137	0.000298806	0.000719153	0.000427162	0.000719633	0.000650411	0.000125684	3.11e-05	0.000168322	1.3e-05	0.000548323	8.4e-05	0.000304791	0.00108802	0.000239212	0.000559599	0.000876346	0.000198317	0.00071253
K00873_pyruvate_kinase	0.000434895	0.000864242	0.000532345	0.000668851	0.000478225	0.000667983	0.000415616	0.000840215	0.000683008	0.000720056	0.000499981	0.000594719	0.00073326	0.000285144	0.000360716	0.000274587	0.00049213	0.00064621	0.000357386	0.000546001	0.000572587	0.000450793	0.000407113	0.000354924	0.000718281	0.000708034	0.00066432	0.000633677	0.000661428	0.000675568	0.000379944	0.000800282	0.000604936	0.000734198	0.000650383	0.000415595	0.000345687	0.000511884	0.000474651	0.000618807	0.000482176	0.000489631	0.000780795	0.000513115	0.000613412	0.000904354	0.000402248	0.000600894
K00874_2-dehydro-3-deoxygluconokinase	0.00116517	0.000535939	0.00106181	0.00211304	0.00109674	0.00132098	0.00335385	0.00117797	0.000892748	0.00101509	0.00177712	0.000785494	0.00163357	0.00153119	0.00170395	0.00282336	0.00271541	0.00111903	0.00171419	0.00140777	0.000961335	0.00117217	0.00135173	0.00156287	0.00101766	0.00122992	0.00168672	0.00113344	0.00106446	0.000619975	0.00122409	0.0010819	0.00120236	0.00129716	0.000910454	0.00116004	0.00172783	0.00142875	0.00215443	0.000678068	0.000874304	0.000953955	0.00064889	0.00108421	0.000990397	0.000655768	0.00173421	0.000962357
K00875_D-ribulokinase	0	0	0	0	0	0	0	0	0	0	0	0	0	0	0	0	0	0	0	0	0	0	0	0	0	0	0	0	0	0	0	6.94e-07	0	0	0	0	0	3.8e-06	0	0	0	0	0	0	0	0	0	0
K00876_uridine_kinase	0.000758199	0.000290294	0.000624651	0.000855225	0.000697065	0.000848668	0.0011638	0.000719921	0.000550144	0.000732721	0.000832369	0.00067941	0.00144579	0.000879908	0.000897359	0.00107258	0.00153264	0.000460055	0.00121569	0.000836647	0.00102499	0.000503002	0.00092582	0.00114706	0.000672963	0.00103925	0.00153088	0.000935101	0.0010276	0.000675459	0.000764027	0.000773417	0.00100347	0.000865884	0.000514244	0.00112136	0.00110547	0.000535101	0.00114576	0.000546742	0.000644563	0.000833476	0.000316362	0.000680221	0.00101931	0.000659643	0.00100231	0.000482935
K00877_hydroxymethylpyrimidine_kinase	0	0	1.45e-06	0	0	0	0	0	0	0	0	0	0	0	0	0	0	0	0	0	0	0	0	0	0	0	0	0	0	0	0	0	0	0	0	0	0	0	0	0	0	0	0	0	0	0	0	0
K00878_hydroxyethylthiazole_kinase	0.000130005	0.000417885	0.000130487	4.81e-05	0.000123822	9.91e-05	9.54e-05	0.000155444	0.00014334	0.000262554	2.33e-05	0.000186351	0.00011376	2.12e-05	3.33e-05	0	1.21e-05	0.000204397	3.12e-05	0.000127589	0.000108195	0.000160593	4.35e-05	5.8e-05	0.000154855	0.000224143	0.000146665	0.000139858	0.000156611	0.000152212	6.99e-05	0.00021664	0.000107652	0.00014893	0.000181943	3.7e-05	2.53e-05	9.41e-05	6.31e-05	0.000161608	2.71e-05	0.000127629	0.00036389	0.000133075	0.000143703	0.000243363	7.28e-05	0.000191232
K00879_L-fuculokinase	0	0	1.48e-06	0	0	4.53e-06	0	7e-06	0	3.84e-06	0	4.47e-06	9.23e-06	0	0	0	0	0	9.18e-06	4.46e-06	2.09e-05	0	0	0	8.98e-07	8.33e-06	4.29e-06	1.09e-05	6.06e-06	0	7.01e-06	2.94e-06	3.73e-06	5.74e-06	4.24e-06	1.01e-05	3.57e-06	1.36e-06	9.12e-06	0	0	9.29e-06	0	4.56e-06	0	0	2.05e-06	0
K00880_L-xylulokinase	0	8.38e-07	0	0	1.41e-05	0	0	0	0	0	0	0	0	0	0	0	0	0	7.15e-06	0	4.65e-06	0	4.46e-06	0	0	2.34e-06	0	0	0	6.21e-06	5.7e-06	2.68e-06	0	0	2.02e-06	5.4e-06	6.92e-06	4.01e-06	0	1.01e-05	0	9.15e-06	5.98e-06	4.66e-06	2.33e-06	0	2.03e-06	0
K00881_allose_kinase	0	0	0	0	0	0	0	0	0	0	0	0	0	0	0	0	0	0	5.22e-06	0	0	0	0	0	0	0	0	0	0	0	0	6.02e-07	0	0	0	0	0	0	0	0	0	0	0	0	0	0	0	0
K00882_1-phosphofructokinase	1.48e-05	2.08e-05	2.44e-05	2.97e-05	4.51e-05	1.41e-05	0	2.14e-05	0	6.11e-06	1.16e-05	2.81e-05	3.61e-05	1.01e-05	2.21e-05	9.21e-05	1.09e-05	2.56e-05	3e-05	6.8e-06	3.07e-05	1.65e-05	4.94e-05	4.01e-05	4.59e-05	2.21e-05	2.76e-05	3.46e-05	2.46e-05	2.95e-05	2.34e-05	2.97e-05	5.36e-05	3e-05	2.36e-05	1.79e-05	4.42e-05	4.03e-05	0.000124383	1.92e-05	1.32e-05	3.55e-05	1.98e-05	0.000104924	4.43e-05	1.2e-05	2.17e-05	1.38e-05
K00883_2-dehydro-3-deoxygalactonokinase	0	0	0	0	0	0	0	0	0	0	0	0	0	0	0	0	0	0	6.11e-06	0	7.94e-06	0	0	0	0	0	0	0	0	0	1.92e-06	1.29e-06	0	0	0	0	0	0	0	0	0	0	0	0	0	0	0	0
K00884_N-acetylglucosamine_kinase	7.02e-06	1.4e-06	1.46e-05	0	1.51e-05	2.36e-06	0	0	0	0	0	0	0	0	0	0	0	0	0	6.98e-06	0	0	2.83e-05	8.06e-06	4.22e-06	0	0	0	0	9.92e-06	2.03e-05	6.22e-07	0	0	0	0	2.22e-05	6.69e-06	0	0	0	7.27e-06	0	1.5e-05	0	0	1.64e-06	6.92e-06
K00885_N-acylmannosamine_kinase	1.46e-05	0	0	0	7.67e-06	0	0	0	7.12e-06	0	0	0	0	0	0	0	0	6.67e-06	0	0	7.67e-06	0	7.22e-06	8.12e-06	0	0	0	0	0	1.02e-05	1.04e-05	1.27e-06	0	2.34e-06	0	0	1.15e-05	0	0	8.35e-06	0	0	0	7.6e-06	0	0	0	0
K00886_polyphosphate_glucokinase	0.000116411	0.000263541	0.000104096	8.85e-06	5.4e-05	5.61e-05	1.68e-05	0.000136451	0.000116674	0.000149662	5.45e-05	0.000174394	6.85e-05	2.38e-05	5.25e-05	0	0	0.000168491	0	7.51e-05	0.000108507	0.000137832	5.87e-05	1.93e-05	0.000124958	0.00011049	6.33e-05	0.000121581	0.000129512	3.52e-05	4.81e-05	0.000150426	6.75e-05	0.000127943	0.00011631	2.84e-05	0	4.76e-05	0	8.84e-05	1.55e-05	5.18e-05	0.00025777	3.55e-05	9.67e-05	0.000241636	4.29e-05	0.000148275
K00888_phosphatidylinositol_4-kinase	0	0	0	0	0	3.81e-07	0	0	0	0	0	0	0	0	0	0	0	0	0	0	0	0	1.01e-06	0	0	0	0	0	0	0	0	0	0	0	0	0	0	0	1.34e-06	0	0	1.84e-06	0	0	0	0	1.24e-06	0
K00889_1-phosphatidylinositol-4-phosphate_5-kinase	0	0	0	0	0	0	0	6.18e-07	0	0	0	0	0	0	0	0	0	0	0	0	0	0	2.85e-06	2.94e-06	0	1.52e-06	0	0	0	0	3.65e-07	7.75e-07	0	0	0	0	0	0	0	0	0	0	0	0	1.37e-06	0	2.92e-06	0
K00891_shikimate_kinase	0.000286088	9.02e-05	0.000228791	8.91e-05	0.000231434	0.000169558	0.000295152	0.000202569	9.49e-05	0.000280741	0.000316697	0.000240978	0.000707318	0.00035515	0.000403857	0.00026522	0.000362225	0.000147829	0.000392997	0.000323421	0.00036294	0.000168228	0.000239002	0.000303374	0.000269449	0.000515959	0.000785834	0.000400856	0.0004213	0.000187522	0.000266426	0.000312438	0.000359012	0.000284628	0.000137988	0.000431868	0.000423554	0.000358639	0.000635732	0.000341301	0.000109101	0.000320175	6.38e-05	0.000383361	0.00044959	0.000255536	0.000369679	0.000221173
K00892_inosine_kinase	0	0	0	0	0	0	0	0	0	0	0	0	0	0	0	0	0	4.38e-06	0	0	0	5.78e-06	0	0	0	0	0	0	0	0	3.78e-06	4.27e-07	0	0	0	0	0	0	0	0	0	0	0	0	0	0	0	0
K00895_pyrophosphate--fructose-6-phosphate_1-phosphotransferase	0.00124684	0.000208997	0.00082431	0.00141922	0.00113663	0.00115163	0.00190303	0.000820653	0.000692611	0.000514706	0.00121497	0.000592841	0.00100267	0.00215428	0.00130386	0.00135694	0.00132347	0.000945352	0.00117175	0.00131639	0.00084052	0.000799402	0.00139	0.00125914	0.00045552	0.000681307	0.000928725	0.000813106	0.000959546	0.000601334	0.00155676	0.000655868	0.00108612	0.000648656	0.000702359	0.00149301	0.00107817	0.000727465	0.000816165	0.000995282	0.00103301	0.00103347	0.000192905	0.000668029	0.00109438	0.00067297	0.00130804	0.000780597
K00897_aminoglycoside_3'-phosphotransferase	0	0	0	0	0	0	0	6.37e-06	0	0	0	0	0	0	0	0	0	0	0	0	0	0	0	0	0	0	0	0	0	0	0	7.24e-07	6.96e-06	0	0	0	0	0	0	0	0	0	0	8.73e-06	0	0	0	0
K00898_pyruvate_dehydrogenase_kinase	0	0	0	0	0	0	0	0	0	0	0	0	0	0	0	0	0	0	0	0	0	0	5.93e-06	0	0	0	0	0	0	0	0	4.06e-07	0	0	0	0	0	0	0	0	0	0	0	0	0	0	0	0
K00899_5-methylthioribose_kinase	9.98e-06	2.02e-05	2.12e-05	5.43e-06	1.62e-05	2.75e-05	0	2.78e-05	2.03e-05	1.3e-05	4.16e-05	4.05e-05	1.84e-05	2.89e-05	8.82e-05	3.73e-05	7.96e-06	0	1.72e-05	0	2.74e-05	6.57e-05	2.09e-05	0	1.84e-05	5.71e-05	2.35e-05	1.19e-05	3.01e-06	1.46e-05	4.02e-06	1.35e-05	3.47e-05	1.67e-05	4.77e-05	2.17e-05	1.21e-05	9.78e-06	1.04e-05	0	1.9e-05	3.68e-05	5e-05	0	5.37e-06	9.04e-06	2.14e-05	1.5e-05
K00900_6-phosphofructo-2-kinase	0	0	0	0	0	0	0	0	0	0	0	0	0	5.68e-06	0	0	0	0	0	0	0	0	0	0	0	0	0	0	0	0	0	0	0	0	5.47e-07	0	0	0	0	0	0	0	0	0	0	0	9.76e-07	0
K00901_diacylglycerol_kinase	0	1.01e-05	1.13e-05	0	0	5.49e-06	1.6e-05	7.14e-07	0	0	3.01e-06	0	0	2.58e-05	0	0	0	0	0	3.37e-05	3.78e-05	3.92e-05	0	1.99e-05	0	0	5.77e-06	0	0	0	2.38e-06	7.93e-06	1.75e-06	0	9.04e-06	7.38e-06	0	6.67e-05	0	2.07e-05	3.73e-06	1.87e-05	0	0	9.24e-06	0	3.45e-06	1.73e-05
K00902_dolichol_kinase	0	0	0	0	0	0	0	0	0	0	0	0	0	0	0	0	0	0	0	0	4.31e-06	0	0	0	2.41e-06	0	0	0	0	0	0	0	0	0	0	0	0	0	0	0	0	0	0	0	0	0	0	0
K00903_protein-tyrosine_kinase	0	0	0	0	0	0	0	0	0	0	0	0	0	0	0	0	0	2.71e-06	8.61e-06	0	3.19e-06	0	0	5.82e-07	0	0	0	0	0	0	3.94e-06	9.57e-07	0	0	0	1.25e-06	0	2.27e-07	0	6.98e-06	0	0	0	0	0	0	0	0
K00904_deoxyguanosine_kinase	1.86e-05	7.75e-06	2.08e-05	0	0	0	8.75e-06	0	0	0	0	0	0	0	0	0	1.52e-05	9.29e-06	0	2.87e-05	0	0	8.79e-06	1.13e-05	0	0	2.87e-06	2.4e-05	3.39e-06	1.23e-05	2.29e-06	2.43e-06	3.72e-06	2.85e-06	0	0	0	9.38e-06	0	0	1.84e-05	1.93e-05	0	0	0	0	0	9.93e-06
K00905_[3-methyl-2-oxobutanoate_dehydrogenase_(acetyl-transferring)]_kinase	0	0	0	0	0	0	0	3.27e-06	0	0	0	0	0	0	0	0	0	0	0	0	0	0	0	0	0	0	0	0	0	0	0	0	0	0	0	0	0	0	0	0	0	0	0	0	0	0	1.13e-06	0
K00906_isocitrate_dehydrogenase_kinase/phosphatase	0	7.15e-07	0	0	0	0	0	0	0	0	0	0	0	0	0	0	0	0	1.17e-05	0	3.88e-06	0	0	0	0	0	1.22e-06	0	1.46e-06	0	6.93e-06	2.5e-06	0	0	5.62e-07	0	0	0	0	4.14e-06	0	3.73e-06	0	0	0	0	0	0
K00907_myosin-light-chain_kinase	0	0	0	0	0	0	0	0	0	0	0	0	0	0	3.94e-06	0	0	0	0	0	0	0	0	0	0	0	0	0	0	0	0	0	0	0	0	0	0	0	0	0	0	0	0	0	0	0	8.83e-07	0
K00908_Ca2+/calmodulin-dependent_protein_kinase	0	0	0	0	0	0	0	0	0	0	0	0	7.03e-07	0	3.33e-06	2.19e-06	0	0	0	0	0	0	0	7.13e-06	0	0	0	0	0	0	0	0	0	0	0	0	0	6.54e-07	0	0	0	0	0	0	0	0	0	0
K00910_beta-adrenergic-receptor_kinase	0	0	0	0	0	0	3.18e-06	0	0	0	0	0	0	0	0	0	0	0	0	0	0	0	0	0	0	0	0	0	0	0	0	0	0	0	0	0	0	0	0	0	0	0	0	0	0	0	0	0
K00912_tetraacyldisaccharide_4'-kinase	0.000177022	5.22e-05	0.000113282	0.000265411	0.000121699	0.00014549	0.000100376	0.000182083	6.07e-05	0.00015534	7.32e-05	0.00013832	0.000371679	8.68e-05	0.00033261	8.2e-05	0.000265919	7.46e-05	0.000260698	0.000194962	0.000146197	0.000110532	0.000190989	0.000215818	0.000152833	0.000252955	0.000381784	0.000270312	0.000226577	0.000141415	9.03e-05	0.000180851	0.000213868	0.00016862	9.67e-05	0.000165401	0.000267414	0.000122024	0.000365045	8.62e-05	5.2e-05	9.19e-05	6.27e-05	0.00019592	0.000192086	0.000132111	0.000172856	4.99e-05
K00914_phosphatidylinositol_3-kinase	2.51e-06	0	0	0	0	0	0	0	0	0	0	0	0	0	0	0	0	0	0	0	0	0	0	0	1.51e-06	0	0	0	0	0	0	0	0	0	0	0	0	0	0	0	0	0	0	0	0	0	0	0
K00917_tagatose_6-phosphate_kinase	6.89e-06	2.74e-06	0	0	0	0	0	0	0	0	0	0	0	0	0	9.43e-06	0	0	2.26e-05	0	0	0	0	0	0	0	0	1.68e-05	0	7.18e-06	1.13e-05	2.71e-06	0	2.25e-06	0	4.29e-06	5.45e-06	0	0	2.37e-05	0	0	0	0	0	0	0	1.36e-05
K00919_4-diphosphocytidyl-2-C-methyl-D-erythritol_kinase	0.000312014	0.000483511	0.00019692	0.000139363	0.00013842	0.000241287	8.71e-05	0.000262765	0.00025045	0.000355488	0.000198848	0.000303557	0.000267423	0.00015851	6.92e-05	5.48e-05	0.000105056	0.000194864	9.33e-05	0.000120146	0.000272495	0.000308667	0.000116307	0.000185802	0.000288643	0.000321153	0.000327276	0.000211137	0.000300408	0.000259131	0.000144843	0.000314189	0.000177567	0.000332142	0.000258764	8.89e-05	0.000114302	0.000172354	0.000125629	0.000202202	5.44e-05	0.000151934	0.000502705	0.000213474	0.000260296	0.000359018	0.000141799	0.000368446
K00920_1-phosphatidylinositol-5-phosphate_4-kinase	0	0	0	0	0	0	0	0	0	0	0	0	0	0	6.63e-06	0	0	0	0	4.19e-06	0	0	5.12e-06	0	0	0	0	0	0	0	0	4.49e-07	0	0	0	0	0	0	0	0	9.47e-06	0	0	0	0	0	0	0
K00921_1-phosphatidylinositol-3-phosphate_5-kinase	0	0	0	0	0	8.16e-07	0	0	0	0	0	9.89e-07	0	0	0	0	0	0	0	0	0	0	0	0	0	0	0	0	2.27e-07	0	0	0	0	0	0	0	0	0	0	0	0	0	0	0	0	0	2.87e-07	0
K00922_phosphatidylinositol-4,5-bisphosphate_3-kinase	0	0	0	0	0	0	0	1.58e-06	0	0	0	1.91e-06	0	0	0	0	1.54e-06	0	0	0	0	0	0	0	0	0	0	0	0	0	0	1.77e-07	0	0	0	5.58e-07	0	0	0	0	0	0	0	0	0	0	9.02e-07	0
K00923_phosphatidylinositol-4-phosphate_3-kinase	0	0	0	0	0	0	0	1.14e-06	0	0	0	0	0	0	0	0	9.75e-07	0	0	0	0	0	0	0	0	0	0	0	0	0	0	0	0	0	0	2.83e-07	0	0	0	0	0	0	0	1.57e-06	0	0	2.96e-07	0
K00924	1.29e-06	0	0	0	3.74e-07	0	0	1.7e-06	0	0	0	0	0	0	0	1.59e-07	0	0	0	1.61e-06	8.37e-06	0	2.64e-07	0	8.3e-07	2.68e-07	0	0	1.29e-07	0	3.11e-07	2.01e-06	0	0	8.48e-07	2.67e-06	5.32e-07	0	0	0	2.45e-06	0	0	0	0	0	7.59e-08	0
K00925_acetate_kinase	0.00144714	0.00162479	0.00149205	0.00156041	0.00119723	0.00149298	0.0016122	0.00140633	0.0013273	0.00137798	0.00176486	0.00132835	0.00121903	0.00153735	0.00126748	0.00114518	0.00108739	0.00143897	0.00115834	0.0012187	0.00147905	0.00150012	0.00144457	0.00129178	0.0013878	0.00136665	0.00122537	0.0010328	0.00133016	0.00149468	0.00114004	0.00139992	0.00114612	0.0014942	0.00133988	0.001056	0.00103284	0.00128762	0.00102176	0.00117928	0.00118333	0.0012237	0.00147975	0.00125706	0.00126354	0.00168459	0.00128633	0.00158824
K00926_carbamate_kinase	3.43e-05	8.38e-05	6.66e-05	7.29e-06	6.65e-05	3.92e-05	2.74e-05	7.44e-05	6.17e-05	8.19e-05	3.35e-05	2.72e-05	0.000109042	2.93e-05	5.41e-05	0.000127023	4.16e-05	5.63e-05	0.000166186	0.000102517	0.000134412	2.41e-05	4.13e-05	7.81e-05	5.74e-05	5.41e-05	5.39e-05	0.000133725	5.57e-05	7.65e-05	6.8e-05	0.000175964	0.000111245	7.15e-05	8.85e-05	4.06e-05	5.97e-05	9.69e-05	0.000157435	3.21e-05	0.000192057	7.09e-05	8.58e-05	0.000176032	0.000104935	3.57e-05	4.66e-05	6.04e-05
K00927_phosphoglycerate_kinase	0.00169882	0.00104509	0.00165921	0.00159798	0.00156272	0.0014789	0.00265123	0.00127967	0.00177316	0.00130601	0.00191849	0.00120167	0.00142636	0.00228385	0.00162454	0.00251999	0.00193483	0.00133498	0.00156568	0.00162308	0.0013929	0.00178408	0.0015845	0.00178845	0.00126519	0.00115814	0.00129588	0.00120061	0.00126342	0.00148645	0.00218426	0.0012894	0.00152143	0.00142851	0.00153153	0.00179667	0.00196484	0.00154077	0.00140362	0.00140502	0.00170363	0.00177736	0.00136128	0.00161102	0.00180302	0.00129277	0.00179115	0.00147032
K00928_aspartate_kinase	0.00135606	0.00135158	0.00103446	0.000755084	0.00138728	0.00113901	0.000853633	0.00143648	0.00118472	0.00155351	0.000931066	0.00124637	0.00146604	0.000848968	0.00112457	0.000728582	0.000883243	0.00113561	0.000988549	0.00124871	0.00137617	0.000945512	0.00117816	0.000902644	0.00139552	0.00141807	0.00140755	0.00108357	0.00158364	0.00133413	0.00109712	0.00158341	0.00147746	0.00128781	0.00125828	0.000821339	0.000979286	0.000969495	0.0010967	0.00109194	0.000925729	0.000994039	0.00101285	0.00101578	0.00143177	0.0017078	0.000989755	0.00105401
K00929_butyrate_kinase	5.28e-05	8.56e-05	4.57e-05	4.44e-05	5.78e-05	5.78e-05	0.000102244	4.6e-05	5.33e-05	0.000110884	5.82e-05	6.5e-05	5.18e-05	8.54e-05	4.69e-05	2.21e-05	4.12e-05	3.25e-05	4.01e-05	5.31e-05	5.18e-05	5.7e-05	4.78e-05	4.77e-05	6.74e-05	0.000147775	0.00012866	0.000145948	6.82e-05	3.32e-05	2.03e-05	8.46e-05	0.000103912	9.95e-05	9.13e-05	0.000149323	5.19e-05	0.000170581	8.1e-05	7.06e-05	8.82e-05	7.35e-05	2.53e-05	8.9e-05	7.52e-05	4.13e-05	6.14e-05	7.72e-05
K00930_acetylglutamate_kinase	0.000710036	0.000975883	0.000580641	0.000250656	0.000561505	0.000518149	0.000426002	0.000712707	0.00070476	0.000811922	0.000525138	0.000663513	0.000840072	0.000125343	0.000708011	0.000396415	0.000677075	0.000562906	0.000711847	0.000534205	0.000544193	0.000614579	0.000546894	0.000522445	0.000785812	0.00076168	0.000883928	0.000517921	0.000801329	0.000759755	0.000378537	0.000862764	0.000666175	0.00078488	0.000648796	0.000271225	0.000527483	0.000480977	0.000648001	0.000483683	0.000403508	0.000476774	0.000822161	0.000632945	0.00068097	0.000994057	0.000492411	0.000675084
K00931_glutamate_5-kinase	0.000343339	0.000958928	0.000387345	0.000332544	0.000287178	0.000464537	0.000131316	0.000608246	0.000396415	0.000575849	0.000315737	0.000539956	0.000318683	8.18e-05	0.000218265	7.81e-05	3.51e-05	0.000499496	7.9e-05	0.000269101	0.000429831	0.000466269	0.000280108	0.000191485	0.000483051	0.000575055	0.000344532	0.000384476	0.000429065	0.000545609	0.000223294	0.000525944	0.000372468	0.000480016	0.000490986	0.000153356	8.94e-05	0.000205131	8.22e-05	0.000374593	0.000167872	0.000298875	0.000679034	0.000243943	0.000397636	0.000707552	0.000142554	0.000417948
K00932_propionate_kinase	0	9.86e-07	0	0	2.57e-06	0	0	0	0	0	0	0	0	0	0	0	0	0	0	0	0	0	0	0	0	0	8.64e-07	0	0	3e-06	9.36e-06	2.27e-06	0	0	1.02e-06	0	4.06e-06	3.15e-06	0	1.82e-05	0	0	0	0	0	0	0	0
K00933_creatine_kinase	0	0	0	0	0	0	0	0	0	0	0	0	0	0	0	0	0	0	0	0	0	0	0	1.04e-05	2.7e-06	0	0	0	0	0	0	4.39e-07	0	0	0	0	0	0	0	0	0	0	0	0	0	0	2.14e-06	0
K00934_arginine_kinase	0	0	0	0	0	0	0	0	0	0	0	0	0	0	0	0	0	0	0	0	0	0	0	0	0	0	0	0	0	0	0	0	0	2.05e-06	0	0	0	0	0	0	0	0	0	0	0	0	0	0
K00936	4.02e-05	5.12e-05	0.000129073	5.77e-05	6.18e-05	6.02e-05	3.22e-05	1.35e-05	2.11e-05	5.58e-05	2.82e-05	5.58e-05	3.92e-05	7.02e-05	5.81e-05	9.23e-05	5.74e-05	4.01e-05	6.32e-05	3.49e-05	9.89e-05	6.82e-05	6.9e-05	7.61e-05	6.17e-05	6.11e-05	4.24e-05	6.24e-05	4.15e-05	9.96e-05	5.25e-05	4.11e-05	2.06e-05	1.99e-05	4.19e-05	5.02e-05	9.17e-05	9.14e-05	9.96e-05	0.0001373	0.000135997	7.12e-05	0.000101473	7.78e-05	7.97e-05	4.15e-05	8.19e-05	5.77e-05
K00937_polyphosphate_kinase	0.000418362	0.000948645	0.000445794	0.000187847	0.000533071	0.00047444	0.000225026	0.000632807	0.000679698	0.000731383	0.000453677	0.000668532	0.000362295	0.000145717	0.000261953	0.000209325	0.000102536	0.000622362	0.000196954	0.000472425	0.000574881	0.000500096	0.000260024	0.000191192	0.000662356	0.000543546	0.000416478	0.000434076	0.000614757	0.000688826	0.000293274	0.000727076	0.000558003	0.000691019	0.000685692	0.000226167	0.000163973	0.000304856	0.000187443	0.000513775	0.000376422	0.000360558	0.000822567	0.000396255	0.000482774	0.000885134	0.000271687	0.000587834
K00938_phosphomevalonate_kinase	6.37e-06	0	2.07e-05	0	0	0	0	4.44e-06	0	0	0	0	0	8.47e-06	0	0	0	0	0	0	0	0	6.31e-06	0	0	0	0	0	8.11e-07	0	8.38e-07	1.13e-06	0	0	0	0	0	0	0	0	0	0	0	0	0	0	0	6.3e-06
K00939_adenylate_kinase	0.00120333	0.00121746	0.000922977	0.000496878	0.00089993	0.000839709	0.000871387	0.00127911	0.000992885	0.00125054	0.000849113	0.00121977	0.00188391	0.000591517	0.00155686	0.000770591	0.00135288	0.000831801	0.00124648	0.00124514	0.00113654	0.000718132	0.000817108	0.00129476	0.00116341	0.00142682	0.00177856	0.00158704	0.00133889	0.00152954	0.000703439	0.00137956	0.00148485	0.00141874	0.000886128	0.000888201	0.00103076	0.0010113	0.00161046	0.00085532	0.00139902	0.000815498	0.000911625	0.00130628	0.00111372	0.001111	0.00111393	0.000676917
K00940_nucleoside-diphosphate_kinase	3.6e-05	4.66e-05	9.62e-05	0	1.66e-05	2.13e-05	1.59e-05	3.53e-05	1.59e-05	1.67e-06	0	1.54e-05	2.38e-05	0	2.51e-05	0	4.48e-05	2.84e-05	2.05e-05	6.4e-05	3.31e-05	0	3.41e-05	3.49e-05	1.76e-05	2.79e-05	0	3.88e-05	1.34e-05	4.8e-05	3.56e-05	3.35e-05	5.69e-05	5.09e-06	7.67e-05	0	1.31e-05	1.09e-05	2.99e-05	3.61e-05	0	0	0	1.7e-05	8.23e-06	5.66e-06	1.04e-05	4.38e-05
K00941_phosphomethylpyrimidine_kinase	6.89e-05	0.000392154	0.000115369	6.63e-05	5.82e-05	0.000156606	7e-05	0.000213075	0.00020499	0.000209021	0.000112559	0.000237505	0.000109859	4.37e-05	2.45e-05	1.47e-05	3.67e-05	0.000197195	2.59e-05	0.000106208	0.000165461	0.000140694	0.000116612	7.99e-05	0.000248303	0.000183861	0.000148257	0.000107199	0.000187569	0.000215385	8.69e-05	0.000232946	0.000139984	0.000234312	0.000182323	4.5e-05	4.34e-05	7.32e-05	7.36e-05	0.000142989	8.68e-05	7.24e-05	0.000301704	8.35e-05	0.000152407	0.000273349	8.14e-05	0.000225164
K00942_guanylate_kinase	0.000305902	0.000720558	0.000259598	9.3e-05	0.000166692	0.000349286	0.000288724	0.000561299	0.000339749	0.000516284	0.000232472	0.000504622	0.000416826	4.57e-05	0.000277273	8.26e-05	0.000289288	0.000351465	0.000273236	0.000195078	0.000379879	0.000275412	0.000275849	0.000177588	0.000400594	0.000474823	0.000626498	0.000239676	0.000574023	0.000495338	0.000213282	0.000501516	0.000364723	0.000529223	0.000391718	0.000111899	0.000160092	0.000237575	0.000319597	0.000229394	0.000123138	0.000267508	0.000578037	0.000196578	0.000452884	0.000586303	0.000160079	0.000348036
K00943_dTMP_kinase	8.62e-05	0.000244066	8.6e-05	3e-05	0.00012336	9.48e-05	2.83e-05	0.000177499	0.000154016	0.000197341	4.73e-05	0.000237392	6.34e-05	0	5.88e-05	0	1.23e-05	5.3e-05	7.31e-06	0.000151697	7.03e-05	0.000104144	8.6e-05	2.52e-05	0.000125105	0.000186155	8.45e-05	7.02e-05	0.000146897	9.35e-05	5.33e-05	0.000176873	8.58e-05	0.000142424	0.000156506	2.82e-05	4.41e-05	3.45e-05	1.02e-05	0.000146109	3.6e-05	8.06e-05	0.000272228	8.28e-05	0.000120725	0.000210347	4.2e-05	0.000178601
K00944_nucleoside-triphosphate--adenylate_kinase	0	0	0	0	0	0	0	0	0	0	0	0	0	0	0	0	0	0	0	0	0	0	0	0	0	0	0	0	0	0	7.71e-08	0	0	0	0	0	0	0	0	0	0	0	0	0	0	0	0	0
K00945_cytidylate_kinase	0.000245078	8.96e-05	0.000197028	7.97e-05	9.1e-05	0.000175766	0.000290185	0.000249957	0.000111778	0.000154458	0.000213754	0.000224508	0.000671151	0.000211877	0.00027895	0.000227975	0.000223499	0.000111581	0.000379574	0.00025945	0.000388326	0.000121933	0.0002357	0.000332956	0.000188441	0.000242365	0.00041108	0.000273333	0.000287813	0.00020247	0.000167673	0.000271546	0.000343867	0.000229304	0.000114158	0.000236718	0.000250928	0.000187087	0.000395942	0.000144313	0.000303149	0.000196478	5.44e-05	0.000215095	0.000256217	0.000211544	0.000246815	0.000157867
K00946_thiamine-monophosphate_kinase	0.000493417	0.000104345	0.000264128	0.000297611	0.000406559	0.000385776	0.000607612	0.000382315	0.000354743	0.000289154	0.00031797	0.000317318	0.000706619	0.000560634	0.000695518	0.000377485	0.000669137	0.000186377	0.000496268	0.000420953	0.00027638	0.000234294	0.000425656	0.000312948	0.000220397	0.000458704	0.000633341	0.000444274	0.000573545	0.000285632	0.000478327	0.000354648	0.00044057	0.000362185	0.000167513	0.000467944	0.000472415	0.000338731	0.000602763	0.000301884	0.000220957	0.000346387	5.79e-05	0.000385089	0.000458776	0.000265184	0.000485362	0.000124242
K00947	8.69e-05	2.52e-05	6.73e-05	0.000122895	9.85e-05	0.000103492	0.000169553	7.3e-05	3.68e-05	5.72e-05	0.000138612	4.45e-05	0.000156319	0.000185657	7.47e-05	0.00010264	0.000118549	7.08e-05	0.000106441	0.000101036	6.87e-05	7.76e-05	0.000156792	0.000131965	4.92e-05	0.000104431	0.000149108	3.78e-05	0.000109598	6.52e-05	0.000106582	6.97e-05	7.95e-05	8.88e-05	5.37e-05	0.000101658	0.000118101	9.24e-05	0.000123992	8.57e-05	8.99e-05	0.00010932	2.69e-05	7e-05	9.19e-05	7.35e-05	0.00011291	4.91e-05
K00948_ribose-phosphate_pyrophosphokinase	0.00170548	0.00191704	0.00158324	0.00136315	0.00179464	0.00179329	0.00152853	0.00185007	0.00181552	0.00201806	0.00179218	0.00191708	0.00164383	0.00153129	0.00130235	0.00139056	0.0014821	0.00165948	0.00150496	0.00163801	0.00181959	0.00158163	0.00146588	0.00156835	0.00162609	0.00207948	0.00187121	0.00177165	0.00197071	0.00166132	0.00148242	0.00212079	0.00183221	0.00187155	0.00189746	0.00173422	0.00143884	0.00145602	0.00148262	0.00171724	0.0015449	0.00164566	0.00187394	0.00164726	0.00188384	0.00211559	0.00142429	0.00173867
K00949_thiamine_pyrophosphokinase	5.49e-05	8.91e-05	2.83e-05	0	5.3e-05	6.6e-05	1.68e-05	6.99e-05	8.04e-05	3.49e-05	5.33e-05	3.24e-05	4.89e-05	0	2.53e-05	0	0	8.37e-05	0	6.69e-05	2.61e-05	9.49e-06	8.1e-06	1.87e-05	7.34e-05	6.88e-05	1.36e-05	4.26e-05	9.86e-05	2.26e-05	3.08e-05	9.74e-05	5.69e-05	6.89e-05	7.73e-05	6.83e-06	8.08e-06	3.98e-05	1.9e-05	3.84e-05	1.5e-05	5.23e-05	9.35e-05	0	4.39e-05	6.15e-05	3.06e-05	4.76e-05
K00950_2-amino-4-hydroxy-6-hydroxymethyldihydropteridine_pyrophosphokinase	4.59e-05	1.01e-06	2.79e-05	1.3e-06	1.49e-05	0	3.15e-05	0	3.82e-07	1.47e-05	0	1.54e-05	0	1.74e-06	4.95e-05	9.33e-05	4.68e-05	3.24e-06	2.43e-05	1.36e-05	3.07e-06	0	0	7.4e-05	2.42e-06	7.11e-06	2.38e-07	5.61e-05	5.87e-06	1.23e-06	1.34e-05	7.77e-06	0	8.65e-07	3.13e-06	8.93e-06	4.03e-07	4.08e-06	3.27e-05	0	0	0	0	2.9e-07	8.55e-06	0	6.83e-06	0
K00951_GTP_pyrophosphokinase	0.00163015	0.00125832	0.0014447	0.00229658	0.00168028	0.00197344	0.00193382	0.00179848	0.00157367	0.00155084	0.00151941	0.00154219	0.00228939	0.00199623	0.00197888	0.00192432	0.00203239	0.00128608	0.00197595	0.00161097	0.00159691	0.00122454	0.00174535	0.00178697	0.00154868	0.00193207	0.00218867	0.00182174	0.00194168	0.00140269	0.00154446	0.00180119	0.00196504	0.00173867	0.00160421	0.00183797	0.00182062	0.0017066	0.00209711	0.00171899	0.00175563	0.00167995	0.00129016	0.00167578	0.00195418	0.00162729	0.00184699	0.00125263
K00954_pantetheine-phosphate_adenylyltransferase	0.000333169	0.00073068	0.000284929	0.000163443	0.000305376	0.000355997	0.000166698	0.000410262	0.000599022	0.00041749	0.000106809	0.000398777	0.000276649	0.000183561	0.000121036	2.46e-05	4.02e-05	0.000402301	1.09e-05	0.000307696	0.000397043	0.000349893	0.000222856	0.000145715	0.000495047	0.000425987	0.000318882	0.000639477	0.000444192	0.000605522	0.000196783	0.000497747	0.000282765	0.000457632	0.000438343	0.000112902	8.26e-05	0.000274898	2.76e-05	0.000423181	0.00019906	0.000282605	0.000665184	0.000237974	0.000464935	0.000636486	0.000163777	0.000405441
K00955	5.64e-05	1.39e-05	2.77e-05	2.35e-05	2.24e-05	6.44e-05	5.28e-05	3.44e-05	9.04e-05	3.55e-05	2.69e-05	3.95e-05	6.64e-05	4.33e-05	8.32e-05	3.39e-05	6.51e-05	2.35e-05	9.41e-05	6.05e-05	7.66e-05	1.48e-05	3.2e-05	4.05e-05	2.45e-05	4.45e-05	6.75e-05	4.87e-05	6.07e-05	3.07e-05	6.85e-05	3.45e-05	4.08e-05	4.75e-05	4.5e-05	8.13e-05	7.19e-05	6.05e-05	0.00010226	1.2e-05	4.95e-05	2.15e-05	1.89e-05	8.58e-05	5.56e-05	2.28e-05	4.47e-05	3.11e-05
K00956_sulfate_adenylyltransferase_subunit_1	0.000183177	0.000109068	0.000204158	0.000142221	0.000147755	0.000215415	0.000288048	0.000128333	0.000293399	0.000231999	0.000252409	0.000212432	0.000322735	0.000316124	0.00025161	0.000162598	0.0002225	0.000123069	0.000325469	0.000180719	0.000229322	7.73e-05	0.000122381	0.00020698	0.000222008	0.000179388	0.000283865	0.000339585	0.000240476	0.000176556	0.000265662	0.000194997	0.000257967	0.00022457	0.000199755	0.000243621	0.00023123	0.000333834	0.000619359	0.000106962	0.000203056	0.000205992	0.00011976	0.00042004	0.000281076	0.000130124	0.00016996	0.000135032
K00957_sulfate_adenylyltransferase_subunit_2	0.00059791	0.000372714	0.0007531	0.000795992	0.000430905	0.00067744	0.000769494	0.000527281	0.000927974	0.000740493	0.000748827	0.000703545	0.00106916	0.00092875	0.000635002	0.00100433	0.00109964	0.000500924	0.000941987	0.000626059	0.000726462	0.000415771	0.000524446	0.000575215	0.000752093	0.000766057	0.000865693	0.000946001	0.000869006	0.000507235	0.000872027	0.000659048	0.000787628	0.000791325	0.000648849	0.000933256	0.000769242	0.00125431	0.00156282	0.000441482	0.000448205	0.000907963	0.000586881	0.00120485	0.000754322	0.00040854	0.000667802	0.000445765
K00958_sulfate_adenylyltransferase	5.24e-06	0	1.07e-05	0	5.4e-06	0	1.1e-05	0	0	4.44e-06	0	0	0	0	0	9.31e-06	0	0	0	0	0	0	0	5.84e-06	0	2.66e-06	0	0	0	0	2.26e-06	1.54e-06	3.8e-06	0	3.39e-06	0	0	1.03e-05	1.15e-05	5.92e-06	9.38e-06	0	0	0	0	0	2.36e-06	9.97e-06
K00960_DNA-directed_RNA_polymerase	0	0	0	0	0	0	0	0	0	0	0	0	0	0	0	0	0	0	0	0	0	0	0	0	0	0	0	0	0	0	0	3.35e-08	1.34e-05	0	0	0	0	0	0	0	0	0	0	0	0	0	7.66e-06	0
K00961_DNA_polymerase	0	0	0	8.05e-06	0	1.27e-06	0	0	0	0	0	0	0	5.38e-06	0	0	1.46e-05	0	0	0	0	0	0	2.6e-05	0	0	0	0	0	5.34e-06	4.97e-07	0	0	0	0	0	0	0	0	0	0	3.92e-06	0	0	0	0	8.85e-07	0
K00962_polyribonucleotide_nucleotidyltransferase	0.00217947	0.00168982	0.00198156	0.00285755	0.00213393	0.00248295	0.00233174	0.00210338	0.00197268	0.00187358	0.0020424	0.00207506	0.00247006	0.00258337	0.00244884	0.00244893	0.00245177	0.00197589	0.00231007	0.00226951	0.00232342	0.00226926	0.00230218	0.00229007	0.0020072	0.00209496	0.00234079	0.00191959	0.00220951	0.0022251	0.00233877	0.00210449	0.00228698	0.00222029	0.00217968	0.00221235	0.00209844	0.00218021	0.00235931	0.00213298	0.00227502	0.00205013	0.00171464	0.00219308	0.00224122	0.00210861	0.00233949	0.00203637
K00963_UTP--glucose-1-phosphate_uridylyltransferase	0.000410766	0.000923773	0.00045088	0.000335552	0.000394796	0.000380311	0.000184004	0.00063486	0.000598319	0.000587467	0.000380871	0.000416605	0.000271395	8.43e-05	0.000126519	0.000118516	6.09e-05	0.000509428	4.51e-05	0.000373916	0.00036827	0.000309268	0.000237175	0.000102876	0.000526009	0.000563137	0.000289776	0.000336844	0.000412736	0.000487013	0.000263232	0.000553241	0.000370307	0.000509554	0.000578655	0.000176476	0.000156985	0.000160649	5.48e-05	0.000395858	0.00034708	0.000300861	0.000685577	0.000214938	0.000353421	0.000763622	0.000214073	0.000421951
K00965_UDPglucose--hexose-1-phosphate_uridylyltransferase	0.000921722	0.00159677	0.000925183	0.000854176	0.00105977	0.000919514	0.000733194	0.00116926	0.001292	0.00109294	0.000908573	0.00114435	0.000646686	0.000525333	0.000662668	0.000681957	0.00068747	0.00100097	0.000702559	0.000908538	0.00104891	0.00100269	0.000847176	0.000717615	0.00128804	0.00119915	0.000716144	0.000912308	0.00105268	0.0010659	0.000709611	0.00126832	0.00126531	0.00131474	0.00124466	0.000717403	0.000742178	0.000968358	0.000977769	0.000976186	0.000807544	0.00101859	0.00149323	0.00137661	0.0010513	0.00148262	0.000868204	0.000983095
K00966_mannose-1-phosphate_guanylyltransferase	0	1.15e-06	0	6.43e-06	0	8.76e-07	0	0	0	0	0	0	0	2.84e-06	0	0	4e-06	0	0	9.87e-06	6.35e-06	0	2.58e-06	5.72e-06	3.59e-06	1.56e-06	0	0	2.17e-06	0	1.51e-06	9.65e-07	0	1.78e-06	0	0	0	1.31e-05	6.09e-06	0	4.76e-06	0	0	0	0	1.49e-06	6.94e-07	2.54e-06
K00968_choline-phosphate_cytidylyltransferase	0.000111313	0.000122824	0.000126939	0.000118333	0.00021902	0.000120377	8.63e-05	0.00029676	1.46e-05	9.46e-05	9.17e-05	7.73e-05	0.000434607	0.000336316	0.000131846	0.000181539	0.000177261	8.21e-05	0.000145986	0.000180547	7.56e-05	0.00013154	0.000169814	0.000177093	0.000124667	0.000262672	0.000353891	0.000135569	0.000150074	9.35e-05	0.000174906	0.00014727	0.000273517	0.000211979	5.23e-05	0.000275634	0.000408209	0.000332368	0.000280179	6.27e-05	0.000116886	0.000157895	0.000103465	0.000171182	0.000167988	7.36e-05	0.000174827	6.67e-05
K00969_nicotinate-nucleotide_adenylyltransferase	0.000414643	0.000935067	0.000306568	5.42e-05	0.000259677	0.000343873	0.000230294	0.000451132	0.000511968	0.000539734	0.000279091	0.000479291	0.000281343	3.63e-05	0.000145846	3.69e-05	0.000110904	0.000415467	7.95e-05	0.000333104	0.000441676	0.000372739	0.000199892	0.00015988	0.000404011	0.000472827	0.000349218	0.000225539	0.000475527	0.000443611	0.000182202	0.000607964	0.000344073	0.000517502	0.000453077	0.00010926	0.000106116	0.000222548	8.88e-05	0.000462658	0.00026664	0.000148203	0.000618742	0.00018998	0.000334256	0.000710966	0.000194794	0.000592531
K00970_poly(A)_polymerase	0.000764653	0.00138504	0.000554712	0.000272892	0.0006531	0.00089269	0.00046085	0.00127926	0.00113077	0.000924578	0.000559934	0.000879529	0.000718427	0.000293739	0.000421558	0.000136041	0.000232843	0.000800637	0.000269416	0.000723243	0.000930118	0.00069567	0.00060821	0.000303007	0.000988602	0.00102568	0.000720862	0.000838169	0.00106889	0.000817301	0.000580189	0.00107892	0.000673204	0.00112387	0.000968531	0.000322733	0.00023992	0.00045778	0.000211197	0.00074743	0.000235366	0.000664656	0.00135514	0.00037515	0.000759606	0.00140989	0.000430024	0.000791977
K00971_mannose-1-phosphate_guanylyltransferase	0.000256643	5.1e-05	0.000124938	0.000445781	0.000251818	0.000304972	0.000437304	0.000258376	0.000137975	0.00017129	0.000343161	0.000137738	0.000565634	0.00048265	0.000321232	0.000256424	0.000268471	0.000148405	0.000217011	0.000282262	0.000206839	0.000135224	0.00031444	0.000310873	0.000175937	0.000352826	0.000758028	0.000234125	0.000377524	0.0001641	0.000224366	0.000208836	0.000382492	0.000310754	0.000189713	0.0002967	0.000250348	0.000143586	0.000355062	0.000245682	0.0002239	0.000179806	5.37e-05	0.000161334	0.000308862	0.00016296	0.000311354	0.000145431
K00972_UDP-N-acetylglucosamine_pyrophosphorylase	2.12e-05	1.47e-05	2.2e-05	5.58e-06	4.53e-05	8.8e-06	5.25e-06	8.17e-06	2.61e-05	1.8e-05	8.58e-06	1.56e-05	4.63e-05	1.49e-05	4.98e-05	3.88e-05	1.94e-05	1.46e-05	4.72e-05	5.3e-06	0	2.47e-05	0	5.4e-05	3.18e-05	2.82e-06	1.39e-05	0	2.25e-05	4.48e-05	2.15e-05	3.03e-05	4.72e-05	1.89e-05	1.73e-05	1.8e-05	1.66e-05	2.49e-05	6.63e-05	6.18e-06	3.95e-05	3.19e-05	4.43e-05	0.00015802	4.72e-05	3.04e-06	3.16e-05	1.05e-05
K00973_glucose-1-phosphate_thymidylyltransferase	0.00317482	0.00175419	0.00450719	0.00331873	0.00289957	0.0029456	0.00342388	0.00262463	0.00383957	0.00259006	0.00320142	0.00237017	0.00278633	0.00433369	0.00328671	0.00384199	0.00349301	0.00313698	0.0037308	0.00340146	0.00244868	0.00344981	0.0037116	0.00377431	0.00287461	0.00277796	0.00281211	0.00253811	0.00243916	0.00240183	0.00351529	0.00256213	0.00259852	0.00242476	0.00356717	0.00397947	0.00419984	0.00385079	0.00345192	0.00265059	0.00367035	0.00322289	0.00263746	0.00326921	0.00227532	0.00196544	0.00335498	0.00303197
K00974_tRNA_nucleotidyltransferase_(CCA-adding_enzyme)_[EC2.7.7.25	5.07e-05	4.95e-05	7.62e-05	3.72e-05	7.54e-05	3.74e-05	3.77e-05	3.5e-05	2.83e-05	1.81e-05	3.55e-05	5.34e-05	5.14e-05	5.63e-05	3.27e-05	3.59e-05	4.78e-05	5.46e-05	8e-05	0.000104665	8.85e-05	4.11e-05	7.23e-05	4.65e-05	6.47e-05	3.99e-05	3.93e-05	3.61e-05	5.46e-05	7.14e-05	6.82e-05	6.04e-05	9.31e-05	2.37e-05	3.81e-05	8.04e-05	8.13e-05	3.51e-05	0.000116997	5.23e-05	0.000129767	2.41e-05	1.3e-05	0.000110808	7.08e-05	3.42e-05	9.16e-05	4.46e-05
K00975_glucose-1-phosphate_adenylyltransferase	0.00118659	0.00161395	0.00156602	0.0013795	0.0011853	0.0010429	0.000997898	0.0012605	0.00137207	0.00153029	0.00123075	0.00144402	0.00105772	0.000711894	0.00106292	0.00172572	0.00153022	0.00148017	0.00153471	0.00119723	0.00109658	0.0012571	0.00115765	0.00149207	0.00191208	0.00118851	0.000911544	0.00149737	0.000975936	0.00168039	0.000995975	0.00161899	0.00163182	0.00143277	0.00158971	0.00100185	0.00125014	0.00195117	0.00206779	0.00140942	0.00225335	0.00130859	0.00173879	0.00246046	0.00129122	0.00119949	0.00137437	0.00147789
K00976_fucose-1-phosphate_guanylyltransferase	0	0	0	0	0	0	0	0	0	0	0	0	0	0	5.64e-06	6.67e-06	0	0	0	0	0	0	0	0	0	0	0	0	0	0	0	0	0	0	0	0	0	0	0	0	0	0	0	0	0	0	8.38e-07	0
K00978_glucose-1-phosphate_cytidylyltransferase	0.000383775	0.000165207	0.000302115	0.000210188	0.000360767	0.00019883	0.000131348	0.000147242	4.13e-05	0.0002753	0.000637108	0.000270835	0.000343768	0.000398183	0.000382267	0.000330978	0.000805772	0.000166641	0.000274597	0.000245268	0.000160447	0.000242809	0.000322403	0.000318135	0.000305404	0.000447078	0.000255817	0.000295133	0.000271215	0.000149728	0.000606241	0.000250325	0.000227593	0.000237606	0.000207781	0.000327894	0.000492688	0.000373242	0.000312781	0.000232695	0.000214031	0.000245068	0.000195599	0.000335217	0.000255754	9.41e-05	0.000368898	0.000292554
K00979_3-deoxy-manno-octulosonate_cytidylyltransferase_(CMP-KDO_synthetase)	8.49e-05	2.2e-05	6.54e-05	2.73e-05	8.3e-05	6.85e-05	7.75e-05	7.93e-05	4.26e-05	7.3e-05	4.17e-05	4.29e-05	0.000176292	4.84e-05	5.36e-05	9.44e-05	5.97e-05	8.56e-05	0.000107628	7.64e-05	3.71e-05	5.98e-05	4.26e-05	5.96e-05	3.58e-05	0.000118124	9.85e-05	2.11e-05	0.000100335	5.93e-05	6.75e-05	6.92e-05	4.73e-05	7e-05	4.18e-05	8.34e-05	4.74e-05	7.39e-05	0.00014216	2e-05	4.78e-05	5.33e-05	7.13e-05	0.000119295	6.28e-05	4.97e-05	8.03e-05	6.69e-05
K00980_glycerol-3-phosphate_cytidylyltransferase	9.23e-05	0.000114177	0.000197502	0.000867625	0.000337675	0.000378836	0.000313786	9.04e-05	2.72e-05	0.000162216	0.000112341	0.000250995	9.88e-05	0.000288078	0.000197615	0.000104973	0.000594299	0.000190185	0.000314025	0.000332554	0.000151656	0.000292932	0.000271492	0.000494235	0.000215532	0.000328339	8.78e-05	0.000196328	4.56e-05	0.000292631	0.00011567	8.33e-05	0.000139769	0.000194736	0.000117206	0.00019522	0.000296239	0.000319562	0.000366333	0.00026265	0.00078128	0.000351535	0.000343052	0.000175014	0.00026906	0.000197899	0.000252032	0.000232778
K00981_phosphatidate_cytidylyltransferase	0.000511259	0.000709087	0.000435999	0.000420374	0.000427422	0.000602377	0.000448278	0.000640203	0.000492926	0.000636513	0.000348828	0.00060546	0.000714304	0.000309065	0.000597233	0.000327793	0.000463876	0.000487165	0.000523889	0.000511529	0.000506714	0.000398918	0.000547036	0.000459097	0.000568741	0.000585224	0.000735828	0.000506134	0.000664468	0.000627855	0.000316211	0.000713554	0.000667617	0.000683215	0.000496102	0.000374301	0.000327924	0.000368614	0.00083569	0.000467168	0.000473842	0.000413504	0.00057695	0.000515525	0.000654843	0.000698854	0.000364331	0.000511399
K00982_glutamate-ammonia-ligase_adenylyltransferase	0.000211155	0.000630628	0.000180559	4.36e-05	0.000154539	0.000215517	9.46e-05	0.000337894	0.000277852	0.000391112	0.000188056	0.000336467	0.000133704	4.66e-05	9.08e-05	3.82e-06	6.53e-06	0.000300459	2.3e-05	0.000153226	0.000226528	0.000240043	0.000113195	4.71e-05	0.000292472	0.000292959	0.000218016	0.000164271	0.000273604	0.000239884	0.000129445	0.00035074	0.000228216	0.000330108	0.000298517	4.88e-05	1.83e-05	9.37e-05	4.26e-06	0.000269668	7.33e-05	0.000149428	0.0004639	0.000100395	0.000225809	0.000474357	8.78e-05	0.000297584
K00983_N-acylneuraminate_cytidylyltransferase	0	1.78e-06	1.51e-05	0	9.79e-06	0	9.01e-06	1.55e-06	0	1.55e-05	0	0	4.1e-06	0	0	0	0	8.37e-06	3e-05	1.8e-05	4.32e-06	0	1.31e-05	1.03e-05	5.39e-06	0	0	0	1.76e-06	0	9.38e-06	4.45e-06	0	8.94e-06	3.16e-06	0	0	3.8e-06	2.8e-05	0	0	1.87e-05	0	1.92e-05	0	0	9.46e-06	9.09e-06
K00984_streptomycin_3"-adenylyltransferase	0	0	0	0	0	0	0	0	0	0	0	0	0	0	0	0	0	0	0	0	0	0	0	0	0	5.81e-06	0	0	0	0	0	0	0	0	0	0	0	0	0	0	0	0	0	0	0	0	0	0
K00985_RNA-directed_RNA_polymerase	1.23e-05	2.93e-05	8.51e-06	1.31e-05	0	4.13e-06	1.23e-05	0	4.91e-05	0	0	0	6.31e-06	0	3.87e-05	6.83e-05	1.89e-05	0	8.2e-05	0	1.33e-05	5.81e-05	1.24e-05	1.41e-05	7.37e-06	6.51e-06	1.21e-05	2.99e-05	7.16e-06	0	4.84e-06	2.06e-05	5.23e-06	0	2.14e-05	5.22e-06	9.7e-06	1.17e-05	2.56e-05	7.25e-05	6.88e-05	2.54e-05	1.73e-05	5.24e-05	0	7.12e-06	2.87e-06	0
K00986_RNA-directed_DNA_polymerase	7.5e-05	1.67e-05	0.000123852	3.27e-05	2.28e-05	3.33e-05	2.11e-05	4.58e-05	0	1.87e-06	3.58e-06	1.6e-05	2.28e-05	0	4.42e-05	2.36e-05	5.65e-05	1.76e-05	8.23e-05	7.35e-05	3.91e-06	1.75e-05	4.18e-05	2.81e-05	4.26e-05	2.25e-05	7.58e-06	3.28e-05	1.82e-05	0	2.31e-05	1.3e-05	2.07e-05	8.76e-06	1.81e-05	2.53e-05	1.93e-05	2.4e-05	5.01e-05	3.48e-05	4.1e-05	3.12e-05	1.64e-05	5.62e-05	3.91e-05	1.88e-05	1.97e-05	2.29e-05
K00989_ribonuclease_PH	0.000371622	0.000914204	0.000433591	0.000168089	0.000356033	0.000438219	0.00022033	0.000563803	0.000487748	0.000655572	0.000235255	0.000611717	0.000225226	9.68e-05	8.09e-05	4.35e-05	1.67e-05	0.000506017	4.97e-05	0.000513475	0.000485779	0.000430011	0.000307852	0.000126488	0.000668	0.000583042	0.000354217	0.000308188	0.000634716	0.000410981	0.000242177	0.000627925	0.000394637	0.000664173	0.000617133	0.000153245	5.53e-05	0.00021548	2.73e-05	0.000478799	0.000239558	0.000394682	0.000688048	0.000348838	0.000416523	0.000946432	0.000171913	0.000519628
K00990_[protein-PII]_uridylyltransferase	0.000269288	0.000785691	0.000268822	4.46e-05	0.000258517	0.0002597	9.48e-05	0.000397939	0.000328233	0.000383281	0.000261965	0.000422408	0.000196065	4.47e-05	9.36e-05	6.51e-06	9.49e-06	0.000369833	2.92e-05	0.000278448	0.000280609	0.000242624	0.000140064	7.62e-05	0.000325523	0.000443981	0.000287824	0.000255233	0.000377621	0.00035934	0.00015924	0.000390588	0.000231119	0.000372081	0.000354454	5.7e-05	7.66e-06	9.65e-05	1.23e-05	0.000298272	9.48e-05	0.000171676	0.000579182	0.000198099	0.000248692	0.000472262	8.88e-05	0.000356029
K00991_2-C-methyl-D-erythritol_4-phosphate_cytidylyltransferase	0.000360941	0.00065922	0.000311663	0.000138859	0.000312788	0.000255928	0.000294057	0.000452543	0.000316847	0.000457468	0.000239995	0.000650524	0.000569646	0.000200045	0.000263411	9.99e-05	0.000194504	0.000566619	0.000365477	0.000306348	0.000390062	0.00032413	0.000338953	0.00028496	0.000510249	0.000500003	0.000537401	0.000254078	0.000462797	0.000624609	0.000259637	0.000455066	0.000410995	0.000554075	0.000360741	0.000122536	0.000231585	0.000263823	0.00036668	0.000335382	9.35e-05	0.000267575	0.000467798	0.000261467	0.000397673	0.000457409	0.000206689	0.000282888
K00992	0	0	0	0	0	0	0	0	0	0	0	0	0	0	0	0	0	0	0	0	0	0	0	0	0	0	0	0	0	0	1.63e-06	0	0	0	2.18e-07	0	0	0	0	0	0	1.42e-06	0	0	0	0	0	0
K00993_ethanolaminephosphotransferase	0	0	0	0	0	1.63e-06	0	0	0	0	0	0	0	0	0	0	0	0	0	0	0	0	0	0	0	0	0	0	0	0	0	0	0	0	0	0	0	0	0	0	0	0	0	0	0	0	0	0
K00995_CDP-diacylglycerol--glycerol-3-phosphate_3-phosphatidyltransferase	0.000568143	0.00129723	0.000463332	6.97e-05	0.000507838	0.000395895	0.000236631	0.000491471	0.000618634	0.000897967	0.000462246	0.000851011	0.000355871	0.000122488	0.000328292	0.00023646	0.000134018	0.000500527	9.37e-05	0.000441952	0.000486971	0.000637916	0.000256951	0.000237829	0.000750969	0.000628268	0.000512339	0.000457541	0.000581829	0.000539314	0.000278106	0.00075878	0.000571023	0.00073056	0.000644514	0.000209448	0.000162724	0.00041871	0.000285018	0.000518894	0.000493629	0.000513838	0.000845488	0.000502189	0.000489126	0.000658157	0.000295664	0.000836276
K00996_undecaprenyl-phosphate_galactose_phosphotransferase	4.54e-06	4.67e-06	1.87e-05	1.01e-05	3.37e-05	1.38e-05	4.46e-06	1.15e-05	4.42e-06	3.83e-05	1.99e-05	0	4.55e-06	0	2.14e-05	0	1.13e-05	1.35e-05	1.29e-05	1.92e-05	1.11e-05	1.74e-05	8.96e-06	1.44e-05	1.06e-05	2.24e-05	4.37e-06	0	4.86e-06	3.08e-05	1.41e-05	1.1e-05	1.07e-05	1.57e-05	1.02e-05	3.77e-06	1.88e-05	8.57e-06	9.19e-06	4.9e-06	0	1.7e-05	7.84e-06	9.59e-06	5.42e-06	2.57e-06	1.84e-05	1.34e-05
K00997_holo-[acyl-carrier_protein]_synthase	5.62e-05	0.000240356	8.04e-05	1.5e-05	0.000121087	8.51e-05	2.82e-05	0.000153461	7.02e-05	0.000144328	9.22e-05	0.000126064	0.000108378	2e-05	6.65e-05	2.61e-05	0	5.17e-05	1.17e-05	8.74e-05	9.15e-05	9.97e-05	4.25e-05	1.61e-05	0.000160243	9.68e-05	6.94e-05	3.42e-05	0.000104155	9.92e-05	4.83e-05	0.000164767	0.000101809	0.000183553	0.000111947	4.1e-05	0	1.34e-05	1.61e-05	0.000132715	5.25e-05	8.73e-05	0.000138279	4.5e-05	0.000103828	0.00022017	4.61e-05	0.000132614
K00998_phosphatidylserine_synthase	4.67e-05	1.49e-05	1.3e-05	0.000179507	3.49e-05	0.000116467	4.53e-05	6.58e-05	9.36e-06	2.33e-05	1.52e-05	3.66e-05	0.000103981	6.58e-05	7.42e-06	0	4.68e-05	2.15e-05	4.59e-05	1.84e-05	3.56e-05	0	6.68e-05	2.11e-05	3.41e-05	0.000112311	0.000103245	9.09e-05	5.13e-05	3.72e-05	4.09e-05	5.42e-05	8.65e-05	6.39e-05	4.84e-05	5.81e-05	4.82e-05	3.46e-05	6.79e-05	2.74e-05	4.34e-05	3.86e-05	0	6.94e-05	7.85e-05	2.72e-05	4.27e-05	5.47e-05
K01000_phospho-N-acetylmuramoyl-pentapeptide-transferase	0.00133897	0.00123632	0.00101896	0.00113112	0.00140345	0.00119551	0.00116735	0.00130818	0.00125663	0.00115735	0.000919443	0.00126857	0.0017926	0.00112835	0.00157104	0.000828713	0.00136414	0.00103981	0.00127898	0.00117031	0.00111038	0.000971676	0.00114167	0.00125223	0.001141	0.0014624	0.00172215	0.00112416	0.00155173	0.00103434	0.00110695	0.00133159	0.00142359	0.00130455	0.00112727	0.0013967	0.00126527	0.0011517	0.00148111	0.0012165	0.00120218	0.00110769	0.00100139	0.00105939	0.0012609	0.00116351	0.00111867	0.00108346
K01001_UDP-N-acetylglucosamine--dolichyl-phosphate	0	0	0	0	0	0	0	0	0	0	0	0	0	0	0	0	0	4.18e-06	0	0	0	0	0	0	0	0	0	0	0	0	0	0	0	0	0	0	0	0	0	0	0	0	0	0	0	0	0	0
K01002_phosphoglycerol_transferase	0	0	0	2.98e-06	0	0	0	0	0	0	0	0	1.44e-06	0	0	0	0	0	9.34e-06	0	9.11e-06	0	0	0	0	0	0	0	5.91e-07	0	1.07e-05	2.23e-06	0	0	0	0	0	0	0	1.32e-05	0	0	0	0	0	0	0	0
K01003_carboxyvinyl-carboxyphosphonate_phosphorylmutase	0	0	0	0	0	0	0	0	0	0	0	0	0	0	0	0	0	0	0	0	0	0	0	0	0	0	0	0	1.4e-06	0	1.9e-06	1.32e-06	0	0	0	0	0	0	0	8.49e-06	0	0	0	0	0	0	0	0
K01004_phosphatidylcholine_synthase	0	0	0	0	0	0	0	0	0	0	0	0	0	0	0	0	0	0	0	0	0	0	0	0	0	0	0	0	0	0	1.1e-06	0	0	0	0	0	0	0	8.33e-06	1.04e-05	0	0	0	0	0	0	0	0
K01005	3.01e-05	4.13e-05	0.00014342	7.9e-05	7.84e-05	9.79e-05	3.82e-05	4.91e-05	7.99e-05	0.000124805	2.97e-05	6.22e-05	8.96e-05	8.34e-05	0.000176279	0.000142305	4.65e-05	0.000151597	7.72e-05	8.48e-05	9.07e-05	0.000121757	6.81e-05	0.000113146	5.7e-05	8.32e-05	8.58e-05	0.000104294	9.31e-05	7.31e-05	0.000104971	7.39e-05	4.51e-05	7.73e-05	0.000109089	0.000164135	0.000142357	9.23e-05	0.000109336	9.09e-05	5.12e-05	6.2e-05	9.22e-05	7.75e-05	9.27e-05	4.32e-05	0.000121838	8.86e-05
K01006_pyruvate,orthophosphate_dikinase	0.00303372	0.00160304	0.00345541	0.00416928	0.00340154	0.00288939	0.00454793	0.00223087	0.00245694	0.00254453	0.00401389	0.00265104	0.00229117	0.00421917	0.00345361	0.00556721	0.0050224	0.00317377	0.00452286	0.00326481	0.00268425	0.00394572	0.0040526	0.00376829	0.00300671	0.00207349	0.0020653	0.00316306	0.00201943	0.00339029	0.00348566	0.00208923	0.0033974	0.00249174	0.00334972	0.00350817	0.00401703	0.00448214	0.00327894	0.00339765	0.00492297	0.00401993	0.00262648	0.00355745	0.00270021	0.00189835	0.00427025	0.00335283
K01007_pyruvate,_water_dikinase	5.34e-05	6.12e-05	9.28e-05	3.7e-05	3.73e-05	3.24e-05	8.78e-06	6.24e-05	5.59e-05	4.94e-05	3.07e-05	4.47e-05	3.84e-05	3.83e-05	4.57e-05	2.15e-05	4.6e-05	5.58e-05	2.63e-05	1.86e-05	4.64e-05	7.87e-05	2.65e-05	2.72e-05	6.72e-05	0.000118791	4.93e-05	6.52e-05	2.77e-05	4.49e-05	3.99e-05	5.05e-05	2.36e-05	8.11e-05	4.63e-05	6.21e-05	2.52e-05	2.8e-05	2.51e-05	5.99e-05	5.99e-05	5.51e-05	3.71e-05	5.41e-05	1.52e-05	4.33e-05	7.03e-05	2.92e-05
K01008_selenide,_water_dikinase	5.69e-05	9.35e-05	6.88e-05	7.31e-05	8.06e-05	5.07e-05	4.46e-05	4.72e-05	2.44e-05	4.75e-05	0.000134037	7.38e-05	5.45e-05	0.000158704	5.95e-05	6.94e-05	5.34e-05	7.48e-05	8.54e-05	3.11e-05	4.7e-05	0.000125686	0.00011327	2.82e-05	9.74e-05	7.52e-05	4.31e-05	0.000104776	4.13e-05	3.52e-05	8.77e-05	5.46e-05	8.24e-05	6.03e-05	7.9e-05	0.000143992	0.000127753	0.00016733	0.000258765	0.000103345	0.000112572	9.07e-05	5.23e-05	0.000225567	6.56e-05	6.14e-05	6.27e-05	5.01e-05
K01011_3-mercaptopyruvate_sulfurtransferase	0	2.96e-06	5.2e-06	0	1.59e-05	0	0	5.14e-06	0	0	0	0	0	0	0	0	2.81e-05	1.27e-05	1.7e-05	0	7.56e-06	0	1.48e-05	0	0	0	2.37e-06	1.69e-05	0	1.77e-05	1.78e-05	1.53e-05	6.05e-06	2.37e-06	2.94e-06	9.22e-06	3.89e-06	1.04e-05	0	8.66e-06	2e-05	1.15e-05	0	6.35e-06	3.84e-06	3.83e-06	3.24e-06	1.44e-05
K01012_biotin_synthetase	0.000152267	0.000145481	0.000332116	0.000175199	0.000211422	0.000192627	0.000172944	0.000127632	0.000164081	0.000242116	0.000130256	0.000234304	0.000148313	0.000182993	0.000219309	0.000284024	0.000227115	0.000252513	0.000391103	0.000166701	0.000159659	0.000108281	0.000191386	0.000152967	0.00027993	0.000160662	0.000163653	0.000297968	0.000114469	0.000268906	0.000206339	0.000202624	0.00035952	0.000237764	0.000322225	0.000178781	0.000238292	0.000474157	0.000380377	0.000246697	0.000396468	0.000350824	0.000153363	0.000432324	0.000205312	0.000120357	0.00021411	0.00020981
K01013	0	0	0	0	0	0	0	0	0	0	0	0	0	0	0	0	0	0	0	0	0	0	0	0	0	0	0	0	0	0	0	3.33e-07	0	0	3.9e-07	0	0	0	0	0	0	9.4e-08	0	0	0	0	0	0
K01014_aryl_sulfotransferase	0	0	0	0	0	0	0	0	0	0	0	0	0	0	0	0	0	0	0	0	0	0	0	0	0	0	0	0	0	0	0	0	0	0	0	0	0	0	0	0	0	0	0	0	0	0	1.7e-06	0
K01015_alcohol_sulfotransferase	0	0	0	0	0	0	0	0	0	0	0	0	0	0	0	0	0	0	0	0	0	0	0	0	0	0	0	0	0	0	0	0	0	0	0	0	0	0	0	0	0	0	0	0	0	0	6.66e-06	0
K01019_galactosylceramide_sulfotransferase	0	0	0	0	0	0	0	0	0	0	0	0	0	0	0	0	0	0	0	0	0	0	0	0	1.93e-06	0	0	0	0	0	0	0	0	0	0	0	0	0	0	0	0	0	0	0	0	0	0	0
K01021_protein-tyrosine_sulfotransferase	0	0	0	0	0	0	0	0	0	0	0	0	0	0	0	0	0	0	0	0	0	0	0	0	0	0	0	0	0	0	0	0	0	0	0	0	0	0	0	0	0	0	0	0	0	0	1.21e-06	0
K01023_arylsulfate_sulfotransferase	0	0	4.76e-06	0	0	1.15e-06	3.43e-06	0	6.86e-06	2.91e-06	0	3.43e-06	1.76e-06	0	0	0	2.66e-06	2.2e-05	2.84e-06	0	0	4.02e-06	0	3.95e-06	8.18e-06	7.26e-06	3.37e-06	0	0	9.67e-06	3.14e-06	2.73e-06	2.92e-06	2.23e-06	3.25e-06	7.28e-06	0	3.28e-06	0	8.05e-06	0	0	0	0	3.64e-06	1.98e-06	2.39e-06	0
K01024_[heparan_sulfate]-glucosamine_3-sulfotransferase_1	0	0	0	0	0	0	0	0	0	0	0	0	0	0	0	0	0	0	0	0	0	0	0	0	0	0	0	0	0	0	0	0	0	0	0	0	0	0	0	0	0	0	0	0	0	0	2.92e-06	0
K01025	0	0	0	0	0	2.38e-06	0	0	0	0	0	0	0	0	0	0	0	0	0	0	0	0	0	0	0	0	0	0	0	0	0	0	0	0	0	0	5.56e-06	0	0	0	0	0	0	0	0	0	3.29e-06	0
K01026_propionate_CoA-transferase	0	1.22e-05	0	8.67e-06	4.37e-06	8.27e-06	0	0	8.19e-06	0	1.33e-05	4.13e-06	2.13e-06	0	0	0	0	3.73e-06	1.35e-05	0	0	0	0	4.65e-06	0	2.19e-06	8.12e-06	1.01e-05	1.59e-06	0	4.76e-06	7.95e-06	0	9.36e-06	3.91e-06	0	0	7.72e-06	8.53e-06	4.75e-06	0	4.23e-06	0	0	0	7.2e-06	2.89e-06	0
K01027	0	0	0	0	0	0	0	0	0	0	0	0	0	4.68e-07	0	0	0	0	0	0	0	4.87e-06	4.13e-06	0	0	0	0	0	2.64e-08	0	6.89e-08	1.98e-07	0	0	0	0	0	0	0	0	0	0	0	0	0	0	9.67e-07	0
K01028_3-oxoacid_CoA-transferase_subunit_A	0	0	6.23e-06	0	9.87e-06	3.08e-06	0	0	0	7.78e-06	1.48e-05	9.14e-06	0	0	0	0	2.62e-05	0	0	9.14e-06	9.94e-06	2.14e-05	0	1.02e-05	0	4.79e-06	0	0	6.96e-06	0	1.19e-06	8.83e-06	0	2.99e-06	2.83e-06	1.96e-06	0	0	9.45e-06	0	0	0	0	9.78e-06	0	4.79e-06	2.12e-06	0
K01029_3-oxoacid_CoA-transferase_subunit_B	6.52e-06	6.71e-06	0	1.96e-05	0	1.21e-05	1.63e-05	2.3e-05	0	0	1.07e-05	4.88e-06	4.96e-06	1.14e-05	0	6.88e-05	4.18e-05	9.02e-06	2.7e-05	4.89e-06	1.07e-05	1.61e-05	4.34e-05	6.37e-05	6.61e-06	1.07e-05	3.24e-06	2.39e-05	8.9e-06	1.77e-05	1.17e-05	1.78e-05	1.42e-05	8.26e-06	1.64e-05	3.66e-05	2.03e-05	4.35e-05	1.9e-05	0	1.83e-05	2.56e-05	9.84e-06	1.04e-05	3.97e-06	1.63e-05	1.2e-05	1.93e-05
K01031_3-oxoadipate_CoA-transferase,_alpha_subunit	0	0	0	0	0	0	0	0	0	0	0	0	0	0	1.45e-05	0	0	0	0	1.93e-05	0	0	0	0	0	0	0	0	0	0	0	4.85e-06	0	0	1.68e-06	3.66e-06	0	0	0	0	0	0	0	0	0	0	0	0
K01032_3-oxoadipate_CoA-transferase,_beta_subunit	0	0	1.32e-05	0	0	0	0	0	0	0	0	0	0	0	0	0	0	0	0	0	0	0	0	0	0	0	0	0	5.57e-08	0	3.79e-06	6.85e-06	0	0	1.54e-06	3.96e-06	0	0	0	1.11e-05	0	0	0	0	0	5.47e-06	0	9.23e-06
K01034_acetate_CoA-transferase_alpha_subunit	0	1.99e-06	0	0	0	0	0	0	0	0	1.61e-05	0	0	0	0	0	0	0	7.89e-06	0	0	0	0	0	0	0	0	0	0	0	0	0	0	3.27e-06	0	2.11e-06	0	0	0	0	0	1.03e-05	0	0	0	0	2.3e-06	0
K01035_acetate_CoA-transferase_beta_subunit	2.17e-06	5.82e-07	0	3.2e-06	0	0	3.26e-06	1.06e-05	0	0	0	0	0	0	0	1.16e-05	1.09e-06	0	2.69e-06	0	0	2.1e-06	1.97e-06	1.03e-05	1.46e-06	7.2e-06	3.11e-06	0	1.93e-07	4.16e-06	1.03e-06	8.83e-07	3.43e-07	5.57e-07	5.27e-06	4.96e-06	1.11e-05	1.58e-06	1.29e-06	0	0	8.59e-06	2e-06	0	5.67e-07	7.21e-07	3.99e-07	0
K01036_butyrate-acetoacetate_CoA-transferase	1.08e-05	8.08e-06	6.76e-06	8.18e-06	0	7.67e-06	9.84e-06	4.23e-06	0	1.67e-05	5.38e-06	1.38e-05	0	0	0	9.86e-06	9.92e-06	0	1.09e-05	4.91e-06	0	4.92e-06	2.34e-05	3.73e-06	9.53e-06	2.65e-06	0	0	6.07e-06	5.46e-06	1.13e-05	8.18e-06	1.83e-05	3.92e-06	4.68e-06	2.48e-05	1.49e-05	1.09e-05	1.02e-05	2.3e-05	0	3.4e-05	1.57e-05	1.04e-05	5.76e-06	5.66e-06	1.27e-05	1.94e-05
K01039_glutaconate_CoA-transferase,_subunit_A	1.33e-05	5.3e-06	4.63e-06	1.42e-05	7.19e-06	0	0	1.04e-05	0	5.71e-06	1.09e-05	1.33e-05	1.71e-05	0	2.1e-05	0	1.03e-05	6.13e-06	0	0	1.45e-05	0	1.34e-05	0	2e-05	7.07e-06	1.54e-05	3.25e-05	1.83e-05	0	1.43e-05	1.19e-05	5.68e-06	6.53e-06	4.22e-06	0	5.26e-06	0	6.93e-06	0	0	1.38e-05	0	7.12e-06	3.51e-06	3.86e-06	4.69e-06	0
K01040_glutaconate_CoA-transferase,_subunit_B	4e-05	1.59e-05	5.56e-05	2.56e-05	1.72e-05	3.51e-05	1.69e-05	1.88e-05	0	0	0	2.4e-05	1.65e-05	3.42e-05	2.52e-05	1.48e-05	1.85e-05	7.39e-06	2.68e-05	1.6e-05	8.68e-06	9.49e-06	4.84e-05	2.76e-05	2.4e-05	4.24e-06	1.27e-05	3.9e-05	1.25e-05	0	2.63e-05	2.06e-05	1.37e-05	1.32e-05	3.94e-05	1.7e-05	2.53e-05	7.63e-05	3.34e-05	4.73e-05	2.99e-05	2.49e-05	1.13e-05	5.13e-05	2.11e-05	1.4e-05	6.02e-05	0
K01041	2.02e-05	4.24e-06	1.11e-05	7.06e-05	3.68e-05	4.23e-05	8.42e-05	2.16e-05	3.66e-05	4.5e-06	5.86e-05	2.28e-05	1.94e-05	9.56e-05	3.01e-05	5.18e-05	2.5e-05	1.93e-05	1.16e-05	2.13e-05	1.16e-05	2.14e-05	4.81e-05	1.68e-05	1.03e-05	1.51e-05	1.69e-05	0	2.02e-05	5.11e-06	6.56e-05	1.27e-05	1.41e-05	1.3e-05	2.65e-05	2.13e-05	6.01e-06	2.92e-05	8.85e-06	1.18e-05	2.39e-05	4.34e-05	2.37e-06	9.13e-06	2.4e-05	1.83e-05	2.12e-05	1.05e-06
K01042_L-seryl-tRNA(Ser)_seleniumtransferase	1.93e-05	1.79e-05	6.69e-06	0	0	3.24e-06	2.37e-05	1.11e-05	1.9e-05	1.25e-05	0	3.32e-05	0	1.36e-05	7.16e-06	9.1e-06	1.81e-05	2.17e-05	7.88e-06	9.34e-06	4.93e-06	5.81e-06	9.62e-06	5.51e-06	1.16e-05	1e-05	1.59e-06	4.71e-05	4.52e-06	6.54e-06	1.6e-05	8.74e-06	1.42e-05	1.08e-05	1.8e-05	1.2e-05	3.74e-06	8.96e-06	2e-05	2.94e-05	2.63e-05	1.96e-05	6.75e-06	0	5.14e-06	1.09e-05	1.46e-05	2.78e-05
K01043	0	2.26e-06	0	0	0	0	0	0	0	0	0	0	0	0	0	0	0	9.69e-06	0	0	0	0	0	0	0	0	0	0	0	0	3.46e-06	2.36e-06	0	0	0	4.83e-06	0	5.14e-06	0	0	0	5.45e-06	0	0	0	0	1.26e-06	0
K01044_carboxylesterase	0	0	0	0	0	0	0	0	0	0	0	9.68e-06	0	0	0	0	5.74e-06	0	0	0	0	0	0	0	0	0	0	0	0	0	0	4.83e-07	0	0	0	0	2.39e-06	0	0	0	0	0	0	0	0	0	0	0
K01046_triacylglycerol_lipase	1.08e-05	2.02e-05	1.87e-05	5.73e-06	1.74e-05	1.09e-05	0	7.55e-06	0	2.67e-05	3.53e-05	6.57e-06	2.21e-05	2.3e-05	0	2.89e-05	1.51e-05	3.47e-05	0	0	1.75e-05	0	1.52e-05	3.03e-05	4.84e-05	0	6.91e-06	0	7.32e-06	1.52e-05	7e-06	1.46e-05	2.45e-05	8.78e-06	1.61e-05	2.29e-06	4.25e-06	2.05e-05	4.48e-05	0	2.01e-05	3.27e-05	1.51e-05	1.15e-05	3.54e-05	5.93e-06	3.65e-06	9.99e-06
K01047_phospholipase_A2	0	0	0	0	0	0	0	1.04e-05	0	0	0	0	0	0	6.78e-05	0	0	0	1.89e-06	1.36e-05	4.55e-06	0	0	0	7.28e-06	0	0	0	0	0	0	0	1.21e-06	0	0	0	2.19e-06	0	0	0	0	0	0	0	0	0	2.99e-06	0
K01048_lysophospholipase	0.000157283	0.000507072	0.000142543	2.65e-05	0.000183539	0.000294118	0.000114864	0.000427888	0.000398092	0.000392642	0.000266998	0.000420738	0.00017378	6.07e-05	0.000114025	0	0	0.000271251	3.07e-05	0.000209513	0.000391986	0.000313117	0.00011637	6.2e-05	0.000377891	0.000345349	0.000155291	0.00032276	0.000351107	0.000340374	0.000158444	0.000386644	0.000200252	0.000401789	0.000325792	4.61e-05	1.43e-05	7.43e-05	6.28e-06	0.000220417	3.43e-05	0.000206533	0.000474345	0.000131008	0.000254773	0.000524748	0.000115677	0.000220343
K01049_acetylcholinesterase	0	0	0	0	0	0	0	2.71e-06	0	0	0	0	0	0	0	0	0	0	0	0	0	0	0	0	0	0	0	0	0	0	0	2.92e-07	0	0	0	0	0	0	0	0	0	0	0	0	0	0	0	0
K01050_cholinesterase	0	0	0	0	0	0	0	0	0	0	0	0	0	0	0	0	0	0	0	0	0	0	0	0	0	0	0	0	0	0	0	0	0	0	0	0	0	0	0	0	0	0	0	0	0	0	1.58e-06	0
K01051_pectinesterase	3.95e-05	1.85e-05	2.78e-05	0.000276831	7.1e-06	0.000211	3.3e-05	8.42e-05	5.01e-05	3.97e-05	0	2.65e-05	0.000132978	9.38e-06	0.00013426	4.98e-05	9.12e-05	1.84e-05	6.91e-05	4.51e-05	1.43e-05	7.53e-06	4.65e-05	5.69e-05	3.01e-05	3.69e-05	9.36e-05	6.42e-05	6.91e-05	1.89e-05	1.97e-05	5.12e-05	7.1e-05	4.32e-05	7.65e-05	3.1e-05	3.63e-05	4.47e-05	8.25e-05	3.01e-05	4.39e-05	1.18e-05	8.7e-06	7.08e-05	6.29e-05	4.04e-05	2.45e-05	2.63e-05
K01052_lysosomal_acid_lipase/cholesteryl_ester_hydrolase	0	0	0	0	0	0	0	0	0	0	0	0	0	0	0	0	0	0	0	5.24e-06	0	0	0	0	0	0	0	0	0	0	0	0	0	0	0	0	0	0	0	0	0	0	0	0	0	0	0	0
K01053_gluconolactonase	0	2.3e-06	0	0	6.39e-06	0	0	0	0	0	0	0	0	0	0	0	5.21e-06	0	0	0	0	0	0	0	0	0	0	9.76e-06	2.61e-06	0	1.8e-06	5.16e-07	3e-06	0	0	0	0	0	0	0	0	0	0	0	0	0	0	3.96e-06
K01054_acylglycerol_lipase	0	0	0	0	0	0	0	0	0	0	0	0	0	0	0	0	0	0	0	0	0	0	0	0	0	0	0	0	0	0	0	0	0	0	0	0	0	0	0	0	0	0	0	0	0	0	8.25e-07	0
K01055_3-oxoadipate_enol-lactonase	0	0	0	0	0	0	0	0	0	0	0	0	0	0	0	0	6.36e-06	0	0	0	0	0	0	0	0	0	0	0	0	0	0	0	0	0	0	0	0	0	0	0	0	0	0	0	0	0	0	0
K01056_peptidyl-tRNA_hydrolase,_PTH1_family	0.00085214	0.000943056	0.00067073	0.000633006	0.000671898	0.000758804	0.000705056	0.00111837	0.000840422	0.000807852	0.000656908	0.000786392	0.00134237	0.000747968	0.00104256	0.000756043	0.00106789	0.000704398	0.00097709	0.000712944	0.000704708	0.00067649	0.000759132	0.000850129	0.000838582	0.00110928	0.0013869	0.0011344	0.00112085	0.000652636	0.000660839	0.00110664	0.000756019	0.00108532	0.000708745	0.000817575	0.000807232	0.000678992	0.00117235	0.000622743	0.000479266	0.000632211	0.00065701	0.000824223	0.0010748	0.00126493	0.000803062	0.000807429
K01057_6-phosphogluconolactonase	0.000242312	0.000758835	0.00028589	3.44e-05	0.000235011	0.00032084	0.000129694	0.000447686	0.000452412	0.000553379	0.000278225	0.000386664	0.000182868	0.000114993	0.000127347	1.5e-05	7.06e-06	0.000458682	2.03e-05	0.000226674	0.000411838	0.000200596	0.000131502	1.86e-05	0.000436573	0.000466966	0.000229029	0.00021486	0.000450767	0.000495257	0.000179866	0.000505822	0.000289214	0.000482827	0.000396258	6.53e-05	6.4e-06	0.000125016	0	0.000295677	4.54e-05	0.000256828	0.000692694	0.00014903	0.000336958	0.000581421	0.000133032	0.000454958
K01058_phospholipase_A1	7.31e-06	1.47e-06	0	0	0	0	0	0	0	0	0	0	0	0	0	0	0	0	0	0	0	0	0	0	4.63e-06	0	0	0	2.15e-06	0	7.8e-06	4.32e-06	0	0	8.77e-07	0	0	0	0	1.73e-05	1.44e-05	1.6e-05	0	0	0	0	0	7.62e-06
K01059_lipoprotein_lipase	0	0	0	0	0	0	0	0	0	0	0	0	0	0	0	0	0	0	0	0	0	0	0	0	0	0	0	0	0	0	0	0	0	0	0	0	0	0	0	0	0	0	0	0	0	0	1.01e-06	0
K01060_cephalosporin-C_deacetylase	0	6.63e-06	4.59e-06	0	0	4.47e-06	0	0	0	5.66e-06	1.08e-05	6.65e-06	3.4e-06	0	0	0	1.01e-05	5.68e-06	0	0	0	7.82e-06	0	7.59e-06	0	6.79e-06	4.38e-06	0	1.29e-06	9.34e-06	4.39e-06	6.35e-06	2.83e-06	2.02e-06	6.26e-06	2.81e-06	5.28e-06	1.28e-05	0	7.81e-06	0	0	2.81e-05	0	3.49e-06	0	7.73e-06	6.63e-06
K01061_carboxymethylenebutenolidase	0	1.5e-06	0	0	0	0	0	0	0	0	0	0	0	0	0	0	6.64e-06	0	0	0	0	8.56e-06	0	0	0	0	0	0	0	0	9.11e-06	3.87e-06	0	0	0	3.03e-06	0	8.77e-06	7.52e-06	0	0	0	9.87e-06	0	4.6e-06	0	0	0
K01062_1-alkyl-2-acetylglycerophosphocholine_esterase	0	0	4.06e-06	0	0	0	0	0	0	0	0	0	0	0	0	0	0	0	0	0	0	0	5.9e-06	0	0	0	0	0	0	0	0	0	0	0	0	0	0	0	0	0	0	0	0	0	0	0	0	0
K01066_esterase_/_lipase	0	0	0	0	0	0	0	0	0	0	0	6.51e-06	0	0	1.2e-05	0	0	0	5.45e-06	0	0	0	0	2.52e-07	0	4.04e-06	0	0	0	0	6.94e-06	4.09e-06	0	0	0	1.95e-06	1.41e-05	0	0	1.54e-05	0	0	0	0	0	0	0	0
K01067_acetyl-CoA_hydrolase	2.23e-05	0	1.17e-05	5.56e-05	2.41e-05	2.16e-05	7.16e-05	2.12e-05	2.84e-05	6.43e-06	3.47e-05	2.43e-06	4.39e-06	6.3e-05	6.5e-06	8.19e-05	4.95e-05	7.06e-06	1.01e-05	7.86e-06	2.23e-06	1.21e-05	3.01e-05	2.45e-05	7.46e-06	1.17e-05	1.08e-05	0	1.32e-05	2.49e-05	5.48e-05	1.1e-05	6.43e-06	1.13e-05	1.6e-05	1.78e-05	1.04e-05	3.07e-06	4.47e-06	3.36e-06	2.75e-05	2.4e-05	3.15e-06	8.66e-06	3.11e-05	3.49e-06	2.37e-05	5.15e-06
K01068_palmitoyl-CoA_hydrolase	0	0	0	0	0	0	0	0	0	0	0	0	0	0	8e-06	0	0	0	0	0	0	0	0	0	0	0	0	0	0	0	0	0	0	0	0	0	0	0	0	0	0	0	0	0	0	0	2.22e-06	0
K01069_hydroxyacylglutathione_hydrolase	0	0	0	0	9.47e-06	2.81e-06	0	0	0	0	0	0	0	0	0	0	0	0	2.92e-05	8.77e-06	1.11e-05	8.25e-06	8.35e-06	0	0	0	0	0	0	1.27e-05	9.57e-06	8.12e-07	0	0	0	0	1.43e-05	8.56e-06	1.07e-05	1e-05	1.62e-05	1.88e-05	0	9.65e-06	0	0	2.14e-06	0
K01070_S-formylglutathione_hydrolase	0	1.52e-06	0	0	0	0	0	5.75e-06	0	0	0	0	0	0	0	0	1.16e-05	8.7e-06	1.27e-05	0	0	9.08e-06	0	0	0	0	0	0	1.47e-06	0	7.03e-06	1.07e-05	0	0	1.32e-06	3.23e-06	0	1.52e-05	0	1.81e-05	0	7.76e-06	0	0	0	0	1.74e-06	7.42e-06
K01071_oleoyl-[acyl-carrier-protein]_hydrolase	1.76e-05	1.05e-05	2.4e-05	0	0	0	0	0	0	0	0	8.62e-06	0	0	0	0	0	8.26e-06	0	1.71e-05	0	0	0	0	5.39e-06	0	0	0	1.74e-06	0	1.16e-06	3.89e-06	0	0	1.42e-06	0	2.78e-05	8.55e-06	0	1.03e-05	0	0	0	0	9.47e-06	0	2.07e-06	8.72e-06
K01076	7.95e-06	2.64e-06	6.25e-06	5.96e-05	2.82e-06	1.01e-05	4e-05	9.77e-06	6.96e-06	0	3.89e-05	0	2.72e-07	1.66e-05	4.18e-06	5.53e-06	6.67e-06	4.93e-06	6.58e-06	4.75e-06	4.6e-06	1.57e-05	6.53e-06	6.89e-06	0	8.32e-08	6.98e-07	0	9.88e-07	1.79e-05	7.65e-06	4.99e-06	9.23e-07	2.08e-06	5.05e-06	2.25e-07	1.02e-05	0	0	0	1.98e-05	1.63e-05	0	0	1.86e-06	5.41e-06	1.03e-05	1.66e-06
K01077_alkaline_phosphatase	0.000202869	0.000693291	0.000286168	0.000147156	0.00018562	0.000244007	5.72e-05	0.00039732	0.000185323	0.0002455	0.000117586	0.000274239	0.000148663	0.000210987	3.62e-05	9.65e-05	1.17e-05	0.000347783	7.77e-05	0.000271732	0.000296497	0.000260828	0.000203995	9.97e-05	0.00020417	0.000463148	0.000313161	0.000242124	0.000245464	0.000264284	0.000207934	0.000399546	0.000281072	0.000331628	0.000345221	0.000248187	7.38e-05	0.000100843	6.06e-05	0.000301718	0.000193363	0.000149365	0.000511437	0.000191713	0.000181066	0.000406567	0.000113985	0.000440332
K01078_acid_phosphatase	0	0	0	0	0	0	0	0	0	0	0	0	0	0	0	0	0	0	0	0	0	0	0	0	0	0	0	0	2.32e-06	0	0	0	0	0	0	0	0	0	0	0	0	0	0	0	0	0	9.73e-07	0
K01079_phosphoserine_phosphatase	0.000204398	0.000313898	0.000153996	0.000475989	0.000250373	0.000494422	0.000179417	0.000410493	0.000270364	0.000344584	0.000254849	0.000429393	0.000437788	0.000226685	0.000155459	0.000529497	0.000162871	0.000289026	6.94e-05	0.000242038	0.000421878	0.000128565	0.000281654	0.000135595	0.000394947	0.000498627	0.000524906	0.000482801	0.000404121	0.000208449	0.000164161	0.00039976	0.000349779	0.000419285	0.000347369	0.000354272	0.000155684	9.41e-05	0.00014779	0.000473289	0.000169305	0.000263787	0.000308759	0.000127848	0.000482349	0.000440502	0.000209258	0.00033811
K01080_phosphatidate_phosphatase	0	0	0	0	0	0	0	0	0	0	0	0	0	0	0	0	0	0	0	6.56e-06	0	0	0	0	0	3.18e-06	0	0	0	0	0	0	0	0	0	0	0	0	0	0	0	6.51e-06	0	0	0	0	2.82e-06	0
K01081_5'-nucleotidase	1.41e-05	1.06e-06	1.35e-05	7.44e-06	0	9.37e-06	1.46e-05	2.46e-05	1.68e-05	0	1.18e-05	9.12e-06	0	1.02e-05	0	2.66e-05	0	1.23e-06	1.05e-05	1.43e-05	1.08e-05	5.62e-06	8.58e-06	3.42e-05	0	9.22e-06	8.81e-07	3.26e-06	8.64e-06	3.78e-06	5.32e-06	9.74e-06	7.17e-06	1.01e-05	1.07e-05	2.27e-06	5.42e-06	1.27e-06	7.46e-06	8.73e-06	2.5e-06	0	1.2e-05	1.48e-05	1.08e-05	1.16e-05	1.03e-05	3.96e-06
K01082_3'(2'),_5'-bisphosphate_nucleotidase	0	1.34e-06	0	5.37e-06	0	0	0	0	0	0	0	0	0	0	0	0	0	0	0	0	0	0	0	0	0	0	0	0	0	0	0	0	0	0	0	0	0	0	0	0	0	0	0	0	0	0	0	0
K01083_3-phytase	0	0	0	0	0	0	0	0	0	0	0	0	0	0	0	0	0	0	0	0	0	0	0	0	0	0	0	0	1.18e-06	0	0	0	0	0	0	0	0	0	0	0	0	0	0	0	0	0	0	0
K01084_glucose-6-phosphatase	0	0	0	0	0	0	0	0	0	0	0	0	0	0	0	0	0	0	0	0	0	0	6.03e-06	0	3.61e-06	0	0	0	0	0	0	0	0	0	0	0	0	0	0	0	0	0	0	0	0	0	0	0
K01085_glucose-1-phosphatase	9.96e-05	9.91e-06	0.000134802	1.06e-05	3.75e-05	2.35e-05	2e-05	1.56e-05	0	5.12e-05	4.08e-05	5.96e-05	5.12e-05	1.42e-05	0.000141347	3.69e-05	2.69e-05	8.26e-05	2.87e-05	0.000109484	6.52e-05	3.53e-05	6.03e-05	6.3e-05	2.39e-05	2.64e-06	1.64e-05	1.21e-05	7.84e-05	2.81e-05	6.44e-05	6e-05	4.25e-06	9.76e-06	4.74e-06	6.35e-06	0.000145723	9.97e-05	7.78e-05	2.39e-05	0.000102311	4.64e-05	0	4.25e-05	2.63e-06	3.18e-05	4.43e-05	4.43e-05
K01087_trehalose-phosphatase	0	0	0	2.14e-06	0	0	0	0	0	0	0	0	0	0	0	0	0	0	0	0	2.55e-06	8.07e-07	2.51e-06	0	0	0	0	0	0	0	2.99e-06	6.86e-07	0	2.82e-06	3.98e-07	0	0	0	2.58e-06	9.15e-06	0	0	0	0	0	0	0	0
K01089_imidazoleglycerol-phosphate_dehydratase_/_histidinol-phosphatase	0.000629361	0.000116242	0.000390236	0.000426429	0.000347416	0.000349928	0.000422193	0.000397107	0.000152194	0.000362529	0.000439854	0.000368676	0.000878604	0.000388295	0.000739668	0.000283856	0.000923476	0.000166166	0.000780806	0.000437197	0.000322499	0.00035124	0.000459264	0.000576144	0.000370363	0.000711336	0.000865882	0.000755052	0.000648809	0.000339285	0.000354411	0.00042862	0.000432744	0.000445911	0.000237247	0.000614368	0.000738112	0.000584019	0.000775469	0.000494802	0.000360959	0.000351031	0.000106701	0.000468209	0.000638626	0.000374654	0.00051613	0.000319526
K01090_protein_phosphatase	0.0003518	0.000841348	0.000220393	4.75e-05	0.000326633	0.00031936	0.000167626	0.000486966	0.000474887	0.000405515	0.000294898	0.000431332	0.000251085	5.62e-05	0.000155545	4.94e-06	4.9e-05	0.000359628	3.47e-05	0.00028482	0.000392826	0.000336909	0.000176028	0.000112625	0.000464827	0.000465783	0.000262109	0.000318651	0.000442491	0.00047421	0.000180535	0.000533454	0.000257522	0.000474325	0.000413371	8.08e-05	1.42e-05	0.000162677	3.17e-05	0.000343723	0.000145603	0.000252698	0.000634553	0.000222484	0.000303879	0.000671173	0.000147015	0.000366796
K01091_phosphoglycolate_phosphatase	0.000290296	0.000701754	0.000313576	3.01e-05	0.000154633	0.000303017	8.23e-05	0.000494445	0.000392508	0.000474743	0.000191799	0.000603688	0.000300613	5.47e-05	0.000205029	7.18e-05	9.89e-05	0.00038912	0.000104074	0.000194455	0.000341308	0.000233352	0.000162276	0.000167055	0.000352945	0.000415429	0.000269599	0.000245495	0.000386551	0.000421247	0.000188143	0.000480971	0.000293379	0.000457636	0.000440638	0.00011529	0.000112226	0.000192728	0.000206758	0.000368559	0.000190752	0.000205612	0.000527472	0.000322261	0.000326356	0.000607749	0.000132924	0.000330428
K01092_myo-inositol-1(or_4)-monophosphatase	0.000159268	0.000506153	0.000270064	4.78e-05	0.000196296	0.000187003	9.76e-05	0.000285663	0.000231869	0.000219427	0.000183434	0.000255101	0.000145594	8.44e-05	4.79e-05	1.32e-05	3.01e-05	0.000271464	4.99e-05	0.000142793	0.000169763	0.00019513	9.75e-05	5.12e-05	0.000299274	0.000264049	0.000185297	9.54e-05	0.000215686	0.000225667	0.000105732	0.000256171	0.000178337	0.000238518	0.000246621	6e-05	4.72e-05	0.000107487	3e-05	0.000228323	6.99e-05	0.000155109	0.000442557	6.53e-05	0.000162208	0.000308174	8.46e-05	0.000201516
K01093_4-phytase_/_acid_phosphatase	0	0	0	0	0	0	0	0	0	0	0	0	0	0	0	0	0	0	4.08e-06	0	0	0	0	0	0	0	0	0	0	0	6.3e-06	1.27e-06	0	0	0	2.04e-06	0	0	0	5.65e-06	0	0	0	0	0	0	0	0
K01095_phosphatidylglycerophosphatase_A	0	0	1.83e-05	0	0	0	0	0	0	0	0	0	0	0	0	0	0	1.21e-05	0	0	0	0	1.2e-05	0	0	6.95e-06	0	0	0	0	1.03e-05	1.1e-05	0	0	0	0	1.04e-05	0	0	1.55e-05	0	0	0	1.4e-05	0	0	3.09e-06	0
K01096_phosphatidylglycerophosphatase_B	0	0	0	9.44e-06	0	0	0	0	0	0	0	0	0	0	0	0	0	8.16e-06	0	0	0	0	8.35e-06	1.02e-05	5.32e-06	9.4e-06	0	2.04e-05	0	0	6.77e-06	2.96e-06	0	0	0	0	0	0	0	0	0	9.18e-06	0	0	0	0	0	0
K01097_N-acylneuraminate-9-phosphatase	0	0	0	0	0	0	0	6.72e-06	0	0	0	0	0	0	1.36e-05	0	0	0	0	0	0	0	0	0	0	0	0	0	0	0	0	0	0	0	0	0	0	0	0	0	0	8.92e-06	0	0	0	0	0	0
K01099_phosphatidylinositol-bisphosphatase	0	0	0	0	0	0	0	0	0	0	0	0	0	0	0	0	0	0	0	0	3.6e-06	0	2.72e-06	0	8.91e-07	0	0	0	0	0	0	1.71e-07	0	0	0	0	0	0	0	0	8.93e-06	0	0	0	0	0	1.31e-06	0
K01101_4-nitrophenyl_phosphatase	1.6e-05	1.91e-05	2.31e-05	0	0	5.17e-06	7.71e-06	6.31e-06	0	0	1.26e-05	0	0	0	0	0	0	0	0	1.65e-05	8.78e-06	9.08e-06	7.75e-06	8.82e-06	1.41e-05	1.68e-05	1.01e-05	0	9.48e-06	2.32e-05	6.35e-06	1.57e-05	2.66e-05	2.64e-06	3.8e-06	9.97e-06	2.56e-05	7.71e-06	8e-06	0	0	0	0	0	4.05e-06	4.46e-06	5.4e-06	3.26e-05
K01102_pyruvate_dehydrogenase_phosphatase	0	0	0	4.25e-06	0	0	0	0	0	0	0	2.88e-06	0	0	0	0	0	0	0	2.89e-06	0	0	0	3.32e-06	0	0	0	0	0	0	0	0	0	0	0	0	0	0	0	0	0	0	0	0	0	0	0	0
K01103_fructose-2,6-bisphosphatase	0	0	0	0	0	0	0	0	0	0	0	0	0	5.68e-06	0	0	0	0	0	0	0	0	0	0	0	0	0	0	0	0	0	0	0	0	5.47e-07	0	0	0	0	0	0	0	0	0	0	0	9.76e-07	0
K01104_protein-tyrosine_phosphatase	0.000538358	0.00104043	0.000556888	9.46e-05	0.000385419	0.000457545	0.000237091	0.000895177	0.000660486	0.000725949	0.000314039	0.000587298	0.000509324	0.000114062	0.000100418	0.000114297	5.64e-05	0.000573682	0.000138935	0.000372513	0.000709278	0.000575677	0.000255681	0.000149975	0.000632125	0.00070223	0.000401066	0.000307453	0.000669397	0.000613032	0.00030391	0.000764115	0.00043341	0.000681497	0.000673475	0.000154785	6.75e-05	0.000306031	0.000210591	0.000631912	0.000298924	0.00046935	0.00101441	0.000428145	0.000572513	0.000884099	0.000240626	0.000731347
K01106_inositol-1,4,5-trisphosphate_5-phosphatase	0	0	2.91e-06	0	0	0	0	0	0	0	0	0	0	0	0	0	0	1.56e-06	0	0	0	0	0	0	0	0	0	0	0	0	0	2.65e-07	0	0	0	0	0	0	0	0	0	0	0	0	0	0	8.93e-07	0
K01109_inositol_polyphosphate-4-phosphatase	0	0	0	0	0	0	0	0	0	0	0	0	0	0	0	0	0	0	0	0	0	0	0	0	0	0	0	0	0	0	0	0	0	0	0	0	0	0	0	0	0	0	0	0	0	0	1.07e-06	0
K01110_phosphatidylinositol-3,4,5-trisphosphate_3-phosphatase	0	0	0	0	0	0	0	0	0	0	0	4.61e-06	0	0	0	0	0	0	0	0	0	0	0	0	0	0	0	0	0	3.86e-06	0	0	0	0	0	0	0	0	0	0	0	0	0	0	0	0	0	0
K01112	0	0	0	0	0	0	0	0	0	0	0	0	0	0	0	0	0	0	0	0	1.04e-05	0	5.98e-08	1.1e-05	0	0	0	0	0	0	5.16e-06	1.76e-06	0	0	0	0	0	0	0	1.65e-05	0	0	0	0	0	0	1.67e-06	0
K01113_phosphodiesterase/alkaline_phosphatase_D	0	2.04e-06	3.55e-06	0	1.1e-05	3.45e-06	0	0	5.12e-06	0	8.4e-06	0	2.63e-06	7.29e-06	0	0	3.95e-06	0	8.55e-06	0	0	0	5.17e-06	2.35e-05	3.07e-06	1.85e-05	1.48e-05	0	7.96e-06	0	1.2e-06	4.08e-06	2.18e-06	5.02e-06	1.62e-06	3.09e-05	8.1e-06	0	5.33e-06	6.05e-06	1.91e-05	5.31e-06	0	5.47e-06	1.08e-05	2.97e-06	8.39e-06	5.06e-06
K01114_phospholipase_C	0	0	0	0	0	0	0	0	0	0	0	0	0	0	0	0	0	0	3.44e-06	0	0	0	0	0	0	0	0	0	3.97e-06	4.23e-06	5.33e-07	2.58e-07	0	0	0	1.29e-06	3.23e-06	0	0	0	0	0	0	0	0	0	9.73e-07	0
K01115_phospholipase_D	0	0	3.53e-06	2.84e-06	0	0	2.76e-06	0	0	0	0	0	0	0	0	0	1.46e-06	0	0	0	0	0	0	0	0	0	0	0	3.97e-07	0	3.43e-07	0	0	1.76e-06	0	0	0	0	0	0	0	0	0	0	0	0	5.66e-07	0
K01118_FMN-dependent_NADH-azoreductase	1.01e-05	4.19e-06	7.64e-06	0	0	0	0	0	0	0	0	0	0	0	0	0	0	0	8.9e-06	0	0	1.29e-05	0	0	0	0	0	0	2e-06	1.55e-05	7.01e-06	3.74e-06	0	0	0	4.2e-06	8.12e-06	0	0	1.25e-05	0	0	0	0	0	5.96e-06	0	0
K01119_2',3'-cyclic-nucleotide_2'-phosphodiesterase	0.000105088	3.66e-05	6.28e-05	5.3e-05	9.41e-05	4.25e-05	6.6e-05	7.72e-05	3.25e-05	7.74e-05	5.74e-05	6.71e-05	9.16e-05	5.7e-05	0.000120977	4.1e-05	0.000128461	7.3e-05	9.96e-05	7.88e-05	6.65e-05	7.04e-05	0.000102086	9.94e-05	4.48e-05	9.42e-05	0.000135928	5.28e-05	9.67e-05	9.68e-05	6.61e-05	7.53e-05	0.000108611	6.04e-05	4.14e-05	8.66e-05	0.000116761	7.01e-05	0.000129276	7.04e-05	8.84e-05	8.1e-05	4e-05	9.68e-05	6.28e-05	4.18e-05	6.83e-05	5.74e-05
K01120_3',5'-cyclic-nucleotide_phosphodiesterase	0	0	0	0	0	0	0	0	0	0	0	2.4e-06	0	0	0	0	3.67e-06	0	0	0	0	0	2.36e-06	0	0	0	0	0	0	0	0	1.88e-07	0	0	0	0	2.57e-06	0	0	0	0	2.45e-06	0	0	0	0	1.67e-06	0
K01121_2',3'-cyclic-nucleotide_3'-phosphodiesterase	0	0	0	0	0	0	0	0	0	0	0	0	0	0	0	0	0	0	0	0	0	0	0	0	0	0	0	0	0	0	0	0	0	0	0	0	0	0	0	3.69e-06	0	0	0	0	0	0	0	0
K01122_alkylglycerophosphoethanolamine_phosphodiesterase	0	0	0	0	0	0	0	0	0	0	0	0	0	0	0	0	0	0	0	0	0	0	0	0	0	0	0	0	0	0	0	0	0	0	0	0	0	0	0	0	0	0	0	0	0	0	5.68e-07	0
K01126_glycerophosphoryl_diester_phosphodiesterase	2.32e-05	2.51e-05	1.86e-05	1.69e-05	8.56e-05	3.61e-06	0.000168164	6.8e-06	1.74e-05	1.27e-05	0	1.58e-05	5.87e-05	1.24e-05	8.14e-05	6.83e-05	7.86e-05	2.44e-05	4.75e-05	5.69e-05	1.47e-05	0	7.2e-06	0.000108403	4.38e-05	3.34e-05	9.84e-06	2.26e-05	4.61e-06	7.95e-05	4.43e-05	1.89e-05	2.18e-05	1.09e-05	2.26e-05	3.98e-05	2.63e-05	3.38e-05	0.000131673	2.52e-05	2.01e-05	2.7e-05	3.68e-05	8.63e-05	5.43e-05	5.12e-06	7.64e-05	3.91e-05
K01127_glycosylphosphatidylinositol_phospholipase_D	0	0	0	0	0	0	0	0	0	0	0	0	0	0	0	0	0	0	0	0	2.76e-06	0	0	0	0	0	0	0	0	0	0	0	0	0	0	0	0	0	0	0	0	0	0	0	0	0	0	0
K01128	1.02e-05	1.78e-07	7.54e-08	0	1.26e-07	1.76e-06	0	1.61e-07	3.6e-07	4.15e-07	0	5.17e-06	5.12e-06	0	0	0	0	0	0	0	5.01e-07	0	9.02e-08	0	4.81e-08	2.7e-06	8.28e-06	0	4.15e-06	2.53e-07	2.66e-06	9.89e-07	1.46e-07	3.3e-06	1.13e-07	4.17e-08	3.94e-06	0	2.07e-05	1.19e-05	0	0	3.32e-07	1.07e-05	2.67e-06	2.04e-07	2.39e-06	4.92e-06
K01129_dGTPase	0.000677655	0.000871418	0.000876803	0.000924423	0.000886267	0.000874529	0.000742122	0.000770978	0.000900424	0.000962445	0.000809933	0.000908838	0.000987362	0.00106953	0.000871478	0.00117983	0.000917351	0.000586024	0.000994454	0.000737368	0.000737025	0.000779841	0.000845064	0.000899357	0.000857518	0.000835951	0.00105245	0.00092054	0.000796583	0.000702292	0.000936075	0.000896961	0.00102873	0.000998967	0.000927591	0.0009468	0.00102377	0.000956145	0.000942738	0.000857701	0.000870122	0.000872824	0.000827546	0.00111259	0.000893125	0.000867299	0.00089944	0.000926072
K01130_arylsulfatase	0	5.67e-06	3.79e-05	4.06e-06	2.86e-05	3.67e-05	2.33e-05	6.47e-06	5.75e-05	4.74e-05	1.29e-05	3.8e-06	1.12e-05	1.82e-05	6e-06	2.37e-05	2.07e-06	4.13e-06	1.28e-05	3.8e-06	0	1.09e-05	0	1.31e-05	2.29e-06	2.14e-06	8.11e-06	0	3.47e-06	0	2.41e-05	1.89e-05	0	1e-05	4.04e-05	0.00010218	1.21e-05	2.36e-05	0	9.07e-06	0	2.95e-05	2.15e-05	1.29e-05	7.62e-06	2.6e-05	3.22e-05	2.25e-05
K01133_choline-sulfatase	0	0	0	0	0	0	0	0	0	0	0	0	0	6.03e-06	0	0	0	0	0	0	0	0	0	0	0	0	0	0	8.17e-07	0	0	3.82e-07	1.81e-06	0	0	1.83e-06	0	4.05e-06	4.41e-06	0	0	0	0	4.53e-06	0	0	0	0
K01134_arylsulfatase_A	0	0	0	0	0	0	0	2.87e-06	0	0	0	0	0	0	0	0	0	0	0	0	0	0	0	0	0	0	0	0	0	6.17e-06	0	0	0	0	0	0	0	0	0	0	0	0	0	0	0	0	0	0
K01135_arylsulfatase_B	0	0	0	0	0	0	0	0	0	0	0	0	0	0	0	0	0	0	0	0	0	0	0	0	0	0	0	0	0	0	0	0	0	0	0	0	0	0	0	0	0	0	0	0	0	0	9.49e-07	0
K01136_iduronate_2-sulfatase	0	0	0	0	0	0	0	0	0	0	0	0	0	0	0	0	0	0	0	0	0	0	0	0	0	0	0	0	0	0	0	0	0	0	0	0	3.07e-06	0	0	0	0	0	0	0	0	0	0	0
K01137_N-acetylglucosamine-6-sulfatase	0	1.14e-06	0	3.05e-06	0	2.89e-06	0	0	0	0	0	0	1.47e-06	0	0	0	0	0	0	0	0	3.38e-06	0	0	0	1.52e-06	9.42e-07	0	1.11e-06	0	7.51e-07	7.59e-07	0	0	9.06e-07	2.43e-06	2.26e-06	5.45e-06	2.98e-06	0	0	0	0	0	3.02e-06	0	6.69e-07	0
K01138	3.77e-06	4.96e-06	1.57e-05	1.65e-05	0	1.05e-05	4.2e-05	0	0	3.23e-06	4.33e-05	2.78e-05	3.88e-06	3.22e-05	1.07e-05	0	2.91e-06	1.14e-05	1.35e-05	2.35e-05	1.74e-05	1e-05	8.56e-06	1.2e-05	0	7e-06	2.49e-06	2.99e-05	8.98e-06	5.33e-06	2.79e-05	7.17e-06	0	6.47e-06	3.07e-06	6.82e-06	1.04e-05	2.52e-05	0	2.58e-05	3.83e-06	3.36e-05	0	1.01e-05	0	2.19e-06	4.42e-06	4.66e-06
K01139_guanosine-3',5'-bis(diphosphate)_3'-pyrophosphohydrolase	1.47e-05	4.86e-06	7.41e-06	4.59e-08	2.8e-05	4.23e-06	9.66e-06	0	3.79e-07	6.25e-07	0	5.61e-06	1e-06	4.37e-06	7.09e-06	2.87e-05	9.16e-06	1.45e-05	2.32e-05	8.26e-06	8e-06	3.71e-06	1.09e-05	8.3e-06	1.32e-05	1.43e-05	5.71e-06	2.28e-07	3.49e-06	1.96e-05	2.12e-05	9.51e-06	2.19e-06	2.4e-06	1.11e-05	5.15e-06	2.69e-05	9.62e-06	3.32e-06	1.24e-05	3.31e-05	7.98e-06	8.87e-07	1.67e-05	7.12e-06	3e-07	4.52e-06	5.63e-06
K01141_exodeoxyribonuclease_I	4.47e-06	2.67e-06	9.46e-06	4.77e-06	1.44e-05	1.5e-06	0	6.97e-06	4.34e-06	7.34e-06	0	0	0	0	6.83e-06	0	1.02e-05	8.29e-06	7.34e-06	1.33e-05	4.83e-06	0	1.31e-05	0	2.81e-06	0	0	0	0	0	1.5e-05	2.74e-06	1.92e-06	0	6.9e-07	1.91e-06	1.05e-05	0	0	2.09e-05	0	9.14e-06	0	4.82e-06	0	0	5.14e-06	0
K01142_exodeoxyribonuclease_III	0.00173441	0.00201575	0.0018206	0.00160396	0.00153748	0.00174404	0.00177605	0.0015455	0.00164889	0.00186452	0.00168929	0.00182819	0.00218981	0.00157846	0.00246366	0.00163715	0.0021191	0.00172008	0.00185019	0.00173214	0.00209759	0.00184623	0.00156898	0.00224001	0.00187243	0.00201549	0.00207808	0.00164007	0.00188698	0.0018664	0.00147538	0.00199754	0.00186384	0.00206307	0.00183296	0.00167389	0.00167591	0.00178098	0.00256383	0.0017013	0.00171297	0.00197664	0.0018356	0.00214653	0.00161979	0.0019785	0.00173438	0.00168544
K01143_exodeoxyribonuclease_(lambda-induced)	0	0	0	0	0	0	0	0	0	0	0	0	0	0	0	0	0	0	0	0	1.03e-05	0	0	0	0	5.01e-06	0	0	0	0	0	0	0	0	0	0	0	0	0	2.23e-05	0	0	0	0	0	0	0	0
K01144_exodeoxyribonuclease_V	9.94e-05	2.72e-05	4.99e-05	0.000130017	5.34e-05	0.000127859	8.61e-05	8.82e-05	4.49e-05	5.8e-05	8.91e-05	2.69e-05	0.000222806	9.65e-05	0.00016349	0.000117686	0.000137643	4.16e-05	7.92e-05	0.000126041	9.3e-05	4.4e-05	9.1e-05	5.18e-05	2.98e-05	6.66e-05	0.000123476	6.61e-05	0.000130851	7.64e-05	6.61e-05	5.82e-05	0.000104018	4.87e-05	4.57e-05	8.84e-05	8.21e-05	0.000116236	9.86e-05	4.95e-05	8.44e-05	7.03e-05	6.31e-06	9.59e-05	6.67e-05	6.83e-05	8.27e-05	4.91e-05
K01146	0	2.93e-06	0	0	0	0	0	0	0	0	0	0	0	0	0	0	0	2.39e-06	6.35e-06	0	8.31e-06	0	0	0	0	0	0	0	2.5e-06	0	1.38e-05	2.21e-06	0	0	0	1.84e-07	0	5.83e-06	6.53e-06	1.31e-05	0	0	0	0	0	0	1.51e-06	0
K01147_exoribonuclease_II	0	6.45e-07	4.5e-06	0	2.11e-05	1.09e-06	3.25e-06	2.53e-06	0	2.77e-06	1.06e-05	0	0	0	0	1.23e-05	0	1.19e-05	2.71e-06	9.82e-06	0	3.83e-06	0	0	5.94e-06	4.97e-06	3.2e-06	0	6.07e-07	9.15e-06	1.03e-05	3.6e-06	0	0	1e-06	2.68e-06	7.75e-06	9.27e-06	0	0	6.05e-06	2.7e-05	0	1.04e-05	1.71e-06	0	2.2e-06	3.2e-06
K01150_deoxyribonuclease_I	0	1.79e-06	0	0	0	0	0	0	0	0	0	0	0	0	0	0	0	0	0	0	0	0	0	0	0	4.86e-06	0	0	0	0	2.37e-06	2.36e-06	0	0	0	0	6.75e-06	0	8.9e-06	0	0	0	0	0	0	0	0	0
K01151_deoxyribonuclease_IV	6.8e-05	0.00010122	0.000153155	0.00025993	0.00012306	8.47e-05	6.06e-05	4.11e-05	5.32e-05	5.84e-05	0.000111123	6.69e-05	0.000113243	9.89e-05	9.64e-05	0.000208436	0.000140418	0.000265502	0.000245409	0.000158657	9.82e-05	0.000127813	0.000116681	0.000103829	0.000167108	9.81e-05	4.88e-05	7.34e-05	6.65e-05	0.000169551	0.00011127	0.000162453	0.000188677	4.94e-05	0.000101652	7.17e-05	0.000138083	0.000265916	0.000185855	0.000169585	0.000198042	0.000147163	7.58e-05	0.000240847	9.5e-05	5.85e-05	0.000115612	0.000118738
K01152_type_I_restriction_enzyme	5.71e-06	2.8e-06	3.44e-07	3.32e-06	1.2e-05	7.47e-06	8.3e-06	0	5.69e-06	7.08e-06	0	0	7.09e-06	1.57e-05	1.3e-05	1.02e-05	2.55e-05	1.03e-05	3.3e-05	8.32e-06	5.98e-06	6.52e-06	2.22e-05	1.27e-05	0	1.46e-06	9.08e-07	0	1.86e-06	0	1.01e-05	1.28e-06	1.3e-07	0	5.96e-06	2.34e-06	6.54e-06	0	3.75e-07	6.51e-06	1.03e-05	3.43e-05	8.26e-06	0	4.36e-06	0	4.72e-05	1.15e-05
K01153_type_I_restriction_enzyme,_R_subunit	0.00183981	0.000897994	0.00209218	0.00187442	0.00158317	0.00139011	0.00209318	0.00138431	0.00114662	0.00128685	0.00220613	0.00145823	0.00113915	0.00227248	0.00214363	0.00206809	0.0017658	0.00177089	0.00202996	0.00152557	0.00147545	0.00213419	0.00186053	0.00188218	0.00127226	0.00113478	0.00112087	0.00172212	0.00129851	0.00163013	0.00162309	0.00097474	0.00135896	0.000983115	0.00137051	0.00182878	0.00186728	0.00189089	0.00151913	0.00141751	0.00157787	0.00193201	0.00133622	0.00155578	0.00132079	0.00107076	0.00172895	0.00146307
K01154_type_I_restriction_enzyme,_S_subunit	0.00023476	0.000202134	0.000571479	0.00039062	0.00036127	0.000356256	0.000310688	0.000317185	0.000253594	0.000295054	0.000504354	0.000371095	0.000235063	0.000500781	0.000445938	0.000666699	0.000396846	0.000267551	0.000301939	0.000462881	0.00033493	0.000520089	0.000427007	0.000524124	0.00024943	0.000244795	0.000219058	0.000424161	0.000224724	0.000196319	0.000344643	0.000162346	0.000533478	0.000178035	0.000394241	0.000691368	0.000382584	0.00038511	0.00030112	0.000363575	0.000463842	0.000401942	0.00017854	0.000288241	0.000251484	0.00029263	0.0004118	0.000272122
K01155_type_II_restriction_enzyme	0.000220193	9.22e-05	0.000323512	0.000138137	8.65e-05	0.000214138	0.000161178	0.00024689	0.000263184	0.000157547	0.000168416	9.98e-05	7.61e-05	9.81e-05	0.000207315	0.000141964	0.000132136	0.000144268	0.000167771	0.000278231	0.000112836	0.000175135	0.000231781	0.000338853	0.000185417	2.68e-05	6.59e-05	7.31e-05	0.00019511	0.000146921	0.000259149	0.00013877	7.36e-05	0.000119324	0.000106108	0.00024916	0.000295711	0.000145141	0.000110721	0.000119555	0.000123565	0.000163796	0.000114067	0.000117512	0.000122182	0.000150191	0.000164049	0.000137833
K01156_type_III_restriction_enzyme	0.00076516	0.000459794	0.000506038	0.000392644	0.000647766	0.000438392	0.000230651	0.000350907	0.000466641	0.000479559	0.000709364	0.000408144	0.000280889	0.000582147	0.000399293	0.000343487	0.000370138	0.0010671	0.000437894	0.000716966	0.000469654	0.000524378	0.000748795	0.00034022	0.000466575	0.000262017	0.000321113	0.000575546	0.00049445	0.000610885	0.0005707	0.000422234	0.000522233	0.000361405	0.000590878	0.000454991	0.00054544	0.000554179	0.000226309	0.000595879	0.00037068	0.000468594	0.000616086	0.000440601	0.00024915	0.000457183	0.000562168	0.000913525
K01157	0	0	0	0	1.21e-05	0	0	0	0	0	0	0	0	0	0	0	0	0	0	0	0	0	0	1.84e-05	0	0	0	0	0	0	0	0	0	0	0	0	0	0	0	0	0	0	0	5.7e-06	0	0	0	0
K01159_crossover_junction_endodeoxyribonuclease_RuvC	0.000429386	0.000382229	0.000269765	0.000268229	0.000344923	0.000307863	0.000272971	0.00045579	0.000331353	0.000326069	0.000237528	0.000303477	0.000400539	0.000250128	0.000411325	0.000128654	0.000411382	0.000221318	0.000354958	0.00029472	0.000271424	0.00024125	0.000288763	0.000276391	0.000315697	0.000441751	0.000379924	0.000226493	0.000445657	0.000382546	0.000305904	0.000462536	0.000374248	0.000299724	0.000285596	0.000272854	0.000276441	0.000267398	0.000342785	0.000310983	6.37e-05	0.000325703	0.000331702	0.000250232	0.00053522	0.000419658	0.000286187	0.000265513
K01160_crossover_junction_endodeoxyribonuclease_RusA	1.78e-05	0	0	0	3.8e-05	0	0	0	0	0	0	0	0	0	0	0	0	0	0	0	0	0	0	0	0	0	0	0	0	0	9.56e-05	1.47e-06	0	0	0	0	0	0	0	3.96e-05	0	0	0	0	0	0	0	0
K01162_ribonuclease_III	0	0	0	0	0	0	0	0	6.78e-06	0	0	0	0	0	0	0	0	0	0	0	0	0	0	0	0	7.19e-06	2.23e-06	0	0	9.57e-06	2.67e-06	6e-07	2.89e-06	4.43e-06	0	0	0	0	0	8e-06	0	0	9.53e-06	0	7.16e-06	0	1.59e-06	0
K01163_hypothetical_protein	2.73e-05	0	3.46e-05	0	2.29e-05	1.6e-05	0	2.09e-05	2.07e-05	0	0	2.69e-05	2.84e-05	0	2.13e-05	0	3.18e-05	2.55e-05	5.79e-06	3.41e-05	3.85e-05	1.63e-05	2.86e-05	1.59e-05	4.04e-06	1.12e-05	1.8e-05	3.28e-05	1.35e-05	3.94e-05	1.46e-05	1.48e-05	5.72e-06	8.76e-06	1.92e-05	3.22e-05	5.33e-06	2.04e-05	3.54e-05	0	2.55e-05	1.44e-05	2.82e-05	0	1.42e-05	0	1.58e-05	1.34e-05
K01164_ribonuclease_P	0	0	0	0	0	0	0	0	0	0	0	0	0	0	0	0	0	0	0	0	0	0	2.1e-06	0	0	0	0	0	0	0	0	0	0	0	0	0	0	0	0	0	0	0	0	0	0	0	0	0
K01165_ribonuclease_L	0	0	0	0	0	0	0	0	0	0	0	2.87e-06	0	0	0	0	0	0	0	0	0	0	0	0	0	0	0	0	0	0	0	0	0	0	0	0	0	0	0	0	0	0	0	0	0	0	0	0
K01168_pancreatic_ribonuclease	1.33e-05	0	0	0	0	0	0	0	0	0	0	0	0	0	0	0	0	0	0	0	0	0	0	0	0	0	0	0	0	0	0	0	0	0	0	0	0	0	0	0	0	0	0	0	0	0	0	0
K01169_ribonuclease_I_(enterobacter_ribonuclease)	0	0	0	0	0	0	0	0	0	0	0	0	0	0	0	0	1.2e-05	7.18e-06	0	0	0	0	0	0	0	0	0	0	0	0	6.19e-06	1.38e-06	0	0	0	0	0	0	0	9.4e-06	0	0	0	0	0	0	0	0
K01172	0	0	0	0	0	0	0	0	0	0	0	0	0	0	2.31e-05	0	0	0	0	0	0	0	0	0	0	0	0	0	0	0	0	0	0	0	0	0	0	0	0	0	0	0	0	0	0	0	0	0
K01173_endonuclease	0	7.51e-06	2.08e-05	0	0	0	0	5.87e-06	0	0	0	0	0	0	0	0	0	0	0	7.54e-06	0	0	0	0	0	0	2.49e-06	0	0	0	1.92e-06	0	0	0	0	0	0	0	0	0	1.4e-05	0	0	0	0	0	1.67e-06	7.49e-06
K01175	5.12e-05	8.81e-07	3.69e-06	0	1.28e-05	0	1.28e-06	8.58e-06	4.23e-07	8.18e-08	0	4.22e-07	1.41e-07	2.81e-07	0	0	5.86e-06	0	4.91e-05	6.82e-06	3.57e-07	8.76e-07	1.03e-05	2.27e-07	1.53e-06	4.34e-06	5.1e-06	1.8e-06	9.8e-07	0	1.99e-05	1.21e-06	0	3.56e-07	2.57e-06	0	1.51e-06	0	0	1.29e-06	0	1.13e-06	0	0	5.63e-06	0	6.25e-06	0
K01176_alpha-amylase	8.24e-05	3.03e-05	6.4e-05	8.04e-05	4.38e-05	3.55e-05	1.07e-05	2.8e-05	7.08e-06	2.99e-05	3.88e-05	7.97e-06	8.35e-06	4.34e-06	3.06e-05	2.19e-05	1.43e-05	7.04e-05	8.38e-06	4.53e-05	4.22e-05	3.05e-05	5.25e-05	1.64e-05	2.36e-05	1.58e-05	8.17e-06	1.81e-05	2.25e-05	8.56e-05	3.67e-05	2.27e-05	4.96e-05	2.64e-05	1.81e-05	1.68e-05	2.25e-05	1.77e-05	3.82e-06	3.13e-05	6.23e-05	9.24e-06	1.97e-05	4.18e-05	1.59e-05	2.17e-05	5.65e-05	5.5e-05
K01178_glucoamylase	0	0	0	0	0	0	0	0	0	0	0	0	0	0	0	0	0	0	0	0	0	0	0	0	0	0	0	0	0	0	4.23e-07	0	0	0	0	1.11e-06	0	0	0	0	0	0	0	0	0	0	4.36e-08	3.18e-06
K01179_endoglucanase	1.1e-05	5.94e-06	2.75e-05	3.78e-05	1.78e-05	1.19e-05	2.02e-05	2.12e-05	5.5e-06	1.81e-05	6.53e-06	1.68e-05	2.09e-05	1.33e-05	4.14e-05	4.98e-05	4.46e-05	2.27e-05	4.51e-05	1.64e-05	6.31e-06	2.86e-05	5.76e-05	1.56e-05	1.38e-05	1.25e-05	1.72e-05	5.06e-05	2.3e-05	3.87e-05	1.8e-05	1.93e-05	2.66e-05	8.59e-06	1.76e-05	8.13e-06	3.03e-05	4.96e-05	3.09e-05	1.65e-05	1.46e-05	2.35e-05	5.73e-06	9.03e-05	3.46e-05	2.59e-06	3.67e-05	1.85e-05
K01180_endo-1,3(4)-beta-glucanase	0	0	0	0	0	0	0	0	0	0	0	0	0	0	0	0	0	0	0	0	0	0	0	0	0	0	0	0	0	0	0	5.92e-08	0	0	0	0	0	0	0	0	0	0	0	0	0	0	0	0
K01181_endo-1,4-beta-xylanase	5.85e-05	1.71e-05	7.52e-05	0.000134051	4e-05	8.28e-05	6.77e-05	8.98e-05	9.55e-05	7.63e-05	3.29e-05	4.99e-05	0.000177025	4.36e-05	0.000135914	0.000120649	0.000120753	6.5e-05	0.000104838	0.000107563	7.07e-05	2.18e-05	0.00010048	0.000139346	5.14e-05	9.38e-05	0.00022584	7.42e-05	0.00011719	0.000103573	5.93e-05	9.42e-05	6.15e-05	0.000158567	0.000107069	0.000151959	0.000324865	0.000184191	0.000152237	2.1e-05	0.000126962	7.39e-05	2.78e-05	6.95e-05	9.84e-05	2.45e-05	0.000116169	6.14e-05
K01182_oligo-1,6-glucosidase	0.000509135	0.00129882	0.000500063	0.000200889	0.000517982	0.000563004	0.000342794	0.000784084	0.000829155	0.000800207	0.000754526	0.000970888	0.000468798	0.000252207	0.000273727	0.000291034	0.000224844	0.000803317	0.000208681	0.000716508	0.000631026	0.000664227	0.000436286	0.000272599	0.000811259	0.000806359	0.000507767	0.000719332	0.000717735	0.000824344	0.000406419	0.000899047	0.000623855	0.00085846	0.000731987	0.000274632	0.000161507	0.000382344	0.000275625	0.00064206	0.000367868	0.000407384	0.00121048	0.000508735	0.000666765	0.000965659	0.000299653	0.000736645
K01183_chitinase	0	0	4.86e-06	0	8.49e-06	0	0	0	0	0	0	0	0	0	0	0	0	0	6.58e-06	0	6.33e-06	0	0	6.51e-06	0	0	0	0	1.43e-06	0	5.87e-06	6.98e-07	0	0	0	2.57e-06	2.22e-06	0	0	9.3e-06	1.2e-05	0	0	0	0	0	0	0
K01184_polygalacturonase	0	0	0	0	0	0	0	0	0	0	0	0	0	0	0	0	0	0	0	0	0	0	0	0	0	0	0	0	0	0	0	0	0	0	0	0	4.35e-06	0	0	0	0	0	0	0	0	0	0	0
K01185_lysozyme	0	1.5e-06	3.51e-06	0	0	0	0	0	0	1.3e-05	0	0	0	0	2.2e-05	0	0	0	0	5.05e-06	0	0	0	0	0	2.41e-06	0	0	9.84e-07	2.14e-05	9.06e-05	6.66e-06	0	0	2.2e-06	0	0	0	0	9.04e-05	0	1.29e-05	0	0	0	0	3.12e-06	0
K01186_sialidase-1	1.97e-05	5.48e-06	9.82e-05	1.67e-05	4.24e-05	9.28e-06	3.16e-05	1.23e-05	3.91e-06	5.39e-05	1.29e-05	2.75e-05	4.05e-06	5.6e-05	1.24e-05	5.11e-05	1.82e-05	0.000123068	6.56e-06	4.46e-05	8.51e-06	5.59e-05	2.78e-05	2.26e-05	4.72e-05	2.07e-06	1.04e-05	0	1.07e-05	0	3.26e-05	7.67e-06	1.67e-06	1.67e-05	1.87e-06	2.68e-05	7.15e-05	5.72e-06	2.05e-05	4.65e-05	2.21e-05	7.74e-05	8.85e-05	2.1e-05	4.15e-06	3.2e-05	6.2e-05	2.72e-05
K01187_alpha-glucosidase	0.00122163	0.0016174	0.00152795	0.000594993	0.00125378	0.00115653	0.001346	0.00134327	0.00151204	0.00183865	0.0015829	0.00133717	0.00107402	0.000894214	0.00078517	0.00093522	0.000642815	0.00195307	0.000995077	0.00140586	0.00143356	0.0017993	0.000988723	0.000904446	0.00154366	0.00110136	0.00092774	0.000929705	0.00147351	0.00133048	0.00117972	0.00146385	0.00120047	0.00150848	0.00134519	0.00107066	0.00102852	0.000758876	0.00088407	0.00112673	0.00102891	0.00131405	0.00162326	0.00104926	0.00113953	0.00146937	0.00105987	0.00148354
K01188_beta-glucosidase	0.000467321	0.000674229	0.000356795	0.000140812	0.000323429	0.000191422	0.000306559	0.000219457	0.000197843	0.000436242	0.000372522	0.000422625	0.000641943	0.000207114	0.000605197	0.000417772	0.000685588	0.000338923	0.000564716	0.000441422	0.000241261	0.000378637	0.000307072	0.000337391	0.000395491	0.000490526	0.000666344	0.000363092	0.000403154	0.000358647	0.000211058	0.000323091	0.000352861	0.000408532	0.000244117	0.000275443	0.000547978	0.000431096	0.000678472	0.00031229	0.000368465	0.000319722	0.000423542	0.000518185	0.000431865	0.00021732	0.000431933	0.000460725
K01189_alpha-galactosidase	0	0	0	0	0	0	0	0	0	0	0	0	0	0	0	0	0	0	0	0	0	0	0	0	0	0	0	0	0	0	0	0	1.07e-06	0	0	0	0	0	0	0	0	0	0	0	0	0	0	0
K01190_beta-galactosidase	0.00156599	0.00192892	0.00151609	0.00195287	0.00160567	0.00190857	0.00110916	0.00140843	0.0014766	0.00156457	0.0011393	0.00176362	0.00181687	0.00109103	0.00147742	0.00131983	0.00157443	0.00158644	0.00161687	0.00158579	0.00134342	0.00175945	0.00181765	0.00151692	0.00136696	0.00182357	0.00193898	0.00128668	0.0016734	0.00143053	0.00132807	0.00148247	0.00145693	0.00161625	0.00148154	0.00180475	0.00182424	0.00123775	0.00166443	0.00144481	0.00107092	0.00127179	0.00202253	0.00166783	0.00146117	0.00155606	0.00164134	0.00174981
K01191_alpha-mannosidase	3.42e-05	2.61e-05	2.48e-05	7.4e-05	2.59e-05	2.72e-05	2.24e-05	9.38e-06	1.03e-05	1.87e-05	2.74e-05	3.71e-05	7.18e-06	2.66e-05	3.56e-05	3.88e-05	4.47e-05	3.38e-05	2.42e-05	2.04e-05	2.91e-05	3.1e-05	1.24e-05	5.12e-05	2.42e-05	3.05e-05	2.86e-05	2.5e-05	1.39e-05	2.9e-05	4.07e-05	1.41e-05	1.93e-05	2.37e-05	3.2e-05	3.46e-05	7.24e-05	3.29e-05	1.54e-05	5.17e-05	1.49e-05	5.2e-05	3.74e-05	2.35e-05	2.14e-05	1.3e-05	2.62e-05	5.32e-05
K01192_beta-mannosidase	0.000331416	0.000688677	0.000193988	0.000107986	0.000277366	0.000106252	0.000106136	8.53e-05	7.27e-05	0.000263591	0.000137264	0.00026523	0.000136295	0.000217727	0.000125008	0.000114952	8.93e-05	0.000510712	0.000115804	0.000295027	0.000194989	0.000267407	0.000165698	0.000189205	0.000166435	0.000194082	0.000225767	0.000128061	0.000121862	0.000307698	0.000167649	0.0001248	0.000113617	0.000124571	0.000118401	0.000237048	0.000114364	9.19e-05	7.98e-05	0.000223923	0.000152914	0.000140701	0.000156884	0.000195992	0.000124148	5.7e-05	0.00016556	0.000480414
K01193_beta-fructofuranosidase	0.000392033	0.00107093	0.000366536	0.000101522	0.000344594	0.00035322	0.000156599	0.000591561	0.000601199	0.000599382	0.000324698	0.000630855	0.000330003	8.76e-05	0.000170963	0.000102168	5.16e-05	0.000589951	8.78e-05	0.000465864	0.000378201	0.000383672	0.000138051	0.00015359	0.000548731	0.000625235	0.000328355	0.000304826	0.000504971	0.000425563	0.000232617	0.000608334	0.000436535	0.000616137	0.000520471	0.000137078	7.51e-05	0.000171556	0.000210431	0.00037779	0.000261679	0.000326609	0.000813774	0.000372231	0.000439498	0.000652926	0.000160982	0.000676817
K01194_alpha,alpha-trehalase	0	7.73e-07	0	0	8.15e-06	0	0	0	0	0	0	0	0	0	0	0	3.39e-06	3.45e-06	9.75e-06	0	0	0	0	4.47e-06	0	0	0	0	0	0	1.36e-05	3.77e-06	0	1.27e-06	5.99e-07	4.74e-06	3.08e-06	0	0	1.35e-05	0	3.88e-06	0	0	0	0	7.02e-07	0
K01195_beta-glucuronidase	6.02e-05	8.24e-05	4.82e-05	4.35e-05	2.17e-05	3.39e-05	3.44e-05	4.35e-05	6.02e-05	2.24e-05	5.08e-05	4.08e-05	4.56e-05	3.01e-05	0.000110139	5.2e-05	2.67e-05	4.49e-05	6.19e-05	1.73e-05	4.53e-05	9.47e-05	4.86e-05	5.59e-05	3.73e-05	3.78e-05	5.06e-05	4.06e-05	3.19e-05	6.72e-05	5.76e-05	7.2e-05	3.81e-05	3.34e-05	5.66e-05	3.84e-05	5.79e-05	3.88e-05	4.8e-05	8.8e-05	1.98e-05	5.02e-05	8.06e-05	4.95e-05	4.21e-05	9.31e-05	3.18e-05	5.06e-05
K01196_amylo-1,6-glucosidase	0	0	0	0	0	0	0	0	0	0	0	0	0	0	0	0	1.07e-06	0	0	0	0	0	0	0	0	0	0	0	0	0	0	0	0	0	0	0	0	0	0	0	0	0	0	0	0	0	0	0
K01197_hyaluronoglucosaminidase	4.72e-06	1.53e-06	2.31e-06	5.47e-06	4.97e-06	6.18e-06	1.5e-05	4.23e-06	1.26e-05	4.4e-06	8.73e-06	7.17e-06	2.09e-05	7.9e-06	1.25e-05	5.22e-06	8.4e-07	0	0	8.17e-06	2.48e-05	7.7e-06	7.23e-06	3.18e-06	1.66e-06	8.27e-06	1.4e-05	2e-05	1.28e-05	0	3.59e-06	8.08e-06	1.26e-05	8.11e-06	1.62e-06	9.57e-06	1.77e-06	1.52e-05	1.69e-05	5.45e-06	0	0	0	3.81e-06	4.11e-06	6.62e-06	3.42e-06	2.37e-06
K01198_xylan_1,4-beta-xylosidase	8.72e-05	0.000216376	0.000132835	0.000231377	7.38e-05	0.000215541	6.93e-05	0.000158364	0.000283303	0.000144199	8.4e-05	0.000144216	0.000120822	9.6e-05	0.000137207	0.000180996	0.000157237	0.000112129	0.000272098	0.000141885	0.000136652	6.61e-05	9.04e-05	0.000134007	7.44e-05	0.000195748	0.000131625	7.45e-05	0.000161449	0.000108623	7.89e-05	0.000403511	0.000157205	0.00018248	0.000154678	0.000134716	0.000227328	0.000300798	0.0001716	0.000181897	8.94e-05	0.000139052	0.00015703	0.000129827	0.000143493	0.00028652	0.000139849	6.32e-05
K01200_pullulanase	0.000390067	0.000483389	0.000167284	9.14e-05	0.00027369	0.000159945	0.000270241	0.000151137	0.00012579	0.000241534	0.00013153	0.000302915	0.000539741	0.000204569	0.000333281	0.000144176	0.000376681	0.000278449	0.00032545	0.000288552	0.000179681	0.000239568	0.000239004	0.000268691	0.000215686	0.000313599	0.000509003	0.000166612	0.000363154	0.000215363	0.000206007	0.000185148	0.000127966	0.000237482	0.00012041	0.000245402	0.000196783	0.000207647	0.000423965	0.000218609	0.000209438	0.00017009	0.000273017	0.000218285	0.000302063	0.000177008	0.000239166	0.000385322
K01201_glucosylceramidase	0.000160274	0.000320707	6.62e-05	0.000746898	0.000152209	0.000416628	0.000132624	0.000204657	0.000102307	0.000302235	0.000116265	0.000247589	9.11e-05	6.46e-05	0.000117772	7.07e-05	0.000189434	0.000281069	0.000206157	0.000213595	0.00012219	0.000103772	0.000215047	0.000159795	0.000122846	0.000364823	0.000171177	0.000189744	0.000138261	0.000219388	4.28e-05	0.000122919	0.000185783	0.000120172	0.000259796	0.000183116	9.19e-05	6.86e-05	9.92e-05	0.000175854	0.000158056	7.66e-05	0.00030954	0.000121196	0.000186195	0.000103004	0.00011164	0.000343265
K01203_sucrase-isomaltase_/_oligo-1,6-glucosidase	0	0	0	0	0	0	0	0	0	0	0	0	0	0	0	0	8.98e-07	0	0	0	0	0	0	0	0	0	0	0	0	0	0	0	0	0	0	0	0	0	0	0	0	0	0	0	0	0	0	0
K01204_alpha-N-acetylgalactosaminidase	0	0	3.6e-06	5.52e-06	0	0	0	0	0	0	0	0	0	0	0	9.61e-06	0	4.77e-06	0	0	2.76e-06	0	5.23e-06	0	0	2.75e-06	0	0	1.01e-06	0	0	0	0	0	0	0	0	0	0	6.12e-06	0	0	0	3.58e-06	2.74e-06	0	2e-06	0
K01205_alpha-N-acetylglucosaminidase	6.14e-05	1.28e-05	3.04e-05	9.52e-06	4.08e-05	3.28e-05	5.66e-05	3.67e-05	4.15e-05	5.29e-05	9.09e-05	5.83e-05	9.23e-05	4.15e-05	0.00010201	4.9e-05	0.000138269	3.24e-05	0.000134632	5.82e-05	4.49e-05	5.95e-05	2.38e-05	8.77e-05	4.4e-05	7.34e-05	8.54e-05	0.000115372	6.97e-05	4.96e-05	3.69e-05	5.28e-05	4.77e-05	4.63e-05	3.3e-05	9.11e-05	0.000101613	5.06e-05	9.76e-05	3.82e-05	6.05e-05	2.69e-05	2.07e-05	7.11e-05	7.4e-05	3.6e-05	6.56e-05	1.75e-05
K01206_alpha-L-fucosidase	0.000682212	0.000398062	0.000531455	0.000347349	0.000652895	0.0004805	0.000835884	0.000481274	0.000360755	0.000772891	0.000511939	0.000789925	0.00125065	0.000606813	0.00120984	0.000606999	0.00145468	0.000631864	0.00135813	0.000560172	0.00079863	0.000604358	0.000508825	0.000800723	0.00055538	0.00100572	0.000758069	0.000767243	0.000759527	0.000411847	0.000409547	0.000460282	0.000462525	0.000574076	0.000300164	0.0011222	0.000803406	0.000840313	0.00117742	0.000607214	0.000585656	0.000561757	0.000370327	0.000750506	0.000871552	0.000399244	0.000792519	0.000609698
K01207_beta-N-acetylhexosaminidase	3.78e-05	2.67e-05	2.37e-05	3.36e-05	3.49e-05	2.11e-05	2.73e-05	2.16e-05	1.61e-05	1.86e-05	1.96e-05	3.05e-05	1.12e-05	1.46e-05	5.45e-05	3.2e-05	4.89e-05	4.73e-05	5.06e-05	4.82e-05	2.42e-05	3.28e-05	4.89e-05	4.33e-05	2.05e-05	4.71e-05	3e-05	4.2e-05	1.38e-05	4.02e-05	2.43e-05	2.19e-05	1.44e-05	2.4e-05	9.09e-06	2.69e-05	3.05e-05	4.44e-05	3.99e-05	4.9e-05	4.37e-05	2.38e-05	5.12e-06	4.32e-05	3.03e-05	1.56e-05	3.22e-05	9.29e-06
K01208_cyclomaltodextrinase	0	1.16e-06	2.54e-06	0	0	0	0	0	0	1.07e-06	2.04e-06	0	6.29e-06	0	7.86e-06	4.62e-06	3.61e-06	5.64e-06	1.04e-06	0	0	0	0	0	7.48e-07	1.93e-06	0	0	7.07e-07	5.17e-06	4.78e-07	6.49e-07	0	0	0	5.3e-07	3.86e-06	0	0	3.19e-06	0	0	0	0	2.59e-06	5.34e-06	0	3.62e-06
K01209_alpha-N-arabinofuranosidase	0.0010158	0.000446231	0.000795508	0.000682777	0.000714707	0.000670982	0.000828447	0.000926509	0.000989408	0.000762718	0.000768934	0.000783728	0.00150924	0.000767321	0.00140764	0.0012842	0.00203528	0.00054317	0.00175432	0.00100263	0.000647234	0.000762918	0.000853813	0.00126615	0.000774639	0.00112458	0.00169831	0.00105227	0.00119819	0.00098554	0.000642592	0.00115224	0.0012609	0.00103387	0.00096942	0.00107784	0.00182703	0.00136076	0.00167646	0.000658464	0.000763349	0.000534509	0.000499984	0.00116758	0.000894652	0.00106088	0.00101396	0.00061083
K01210_glucan_1,3-beta-glucosidase	0.000180562	0.000633949	0.000268956	1.7e-05	0.000154493	0.000205564	0.000117287	0.000522101	0.000504581	0.00057753	0.000365735	0.00072018	0.000147483	4.54e-05	0.000106462	6.9e-05	0	0.000479276	2.22e-05	0.000344341	0.000368852	0.000169574	7.5e-05	9.15e-05	0.000366632	0.000366158	0.000194304	0.000194	0.000318966	0.000352434	0.000159125	0.000466047	0.000303385	0.000527337	0.000383924	0.000117447	2.94e-05	0.000227776	3.87e-05	0.000401415	7.94e-05	0.000181583	0.000485426	7.94e-05	0.000420598	0.000413052	0.000151714	0.000314878
K01212_levanase	0.000287377	0.000102367	0.000288183	0.000114623	0.000246895	0.000143099	0.000191214	0.000229744	9.35e-05	0.000212864	0.000220534	0.000294449	0.000630015	0.000153538	0.000593068	0.000183155	0.000503317	0.000189619	0.000462874	0.000368232	0.000433284	0.000181974	0.000361826	0.000394984	0.000235797	0.000407057	0.000611068	0.000313508	0.000424971	0.000242434	0.000219854	0.000364993	0.000272352	0.000310682	6.25e-05	0.000337583	0.0005108	0.000266221	0.000515601	0.000193311	0.000315004	0.000236045	0.000103674	0.000414698	0.000348556	0.000284901	0.000374787	0.000201683
K01213_galacturan_1,4-alpha-galacturonidase	0	9.5e-07	3.31e-06	0	0	0	0	0	0	0	0	0	0	0	0	0	0	0	0	0	0	0	0	0	0	0	0	0	0	0	0	4.23e-07	0	0	7.57e-07	0	0	0	0	0	0	0	0	0	0	0	0	0
K01215_glucan_1,6-alpha-glucosidase	8.68e-06	1.49e-05	1.07e-05	9.56e-06	3.72e-06	5.48e-06	2.84e-06	4.63e-06	2.2e-06	3.14e-06	8.42e-06	5.52e-06	2.72e-06	3.37e-06	2.53e-06	1.23e-05	6.32e-06	7.63e-06	6.67e-06	5.23e-06	1.33e-05	1.36e-05	1.12e-06	1.41e-05	1.08e-05	7.6e-06	6.47e-06	3.33e-05	5.09e-06	1.26e-05	8.04e-06	1.12e-05	5.37e-06	9.27e-06	6.95e-06	5.22e-06	1.82e-05	7.15e-06	2.12e-05	6.96e-06	3.27e-05	5.81e-06	1.34e-05	4.13e-06	4.22e-06	5.53e-06	5.23e-06	6.07e-06
K01216_licheninase	0	0	0	0	0	0	0	0	0	0	0	7.44e-06	0	0	0	0	0	0	6.24e-06	7.45e-06	0	0	0	1.71e-05	0	0	0	0	1.45e-06	2.11e-05	3.92e-06	6.61e-07	0	0	2.37e-06	0	1.18e-05	0	0	0	1.39e-05	0	0	1.59e-05	0	4.33e-06	1.92e-05	1.48e-05
K01217_L-iduronidase	0	0	0	0	0	0	0	0	0	0	0	0	0	0	0	0	0	0	0	0	0	0	0	0	0	0	0	0	0	0	0	0	0	0	0	0	0	2.02e-06	0	0	0	0	0	0	0	0	0	0
K01218_mannan_endo-1,4-beta-mannosidase	4.01e-06	7.99e-07	2.58e-05	0	2.59e-05	8.78e-06	1.21e-05	6.26e-06	3.38e-05	1.03e-05	6.58e-06	2.4e-05	7.86e-06	5.71e-06	0	2.98e-05	1.36e-05	7.74e-06	5.03e-05	8.01e-06	1.74e-05	2.85e-05	2.6e-05	2.37e-05	7.23e-06	3.03e-06	3.97e-06	0	1.4e-05	3.4e-05	1.06e-05	1.54e-05	1.17e-05	4.18e-05	1.69e-05	8.53e-06	3.49e-05	3.06e-05	4.18e-06	1.42e-05	1.82e-05	3.03e-05	2.26e-05	4.46e-05	7.79e-06	5.3e-06	5.57e-05	7.93e-06
K01219_agarase	2.63e-06	0	0	0	0	8.84e-07	0	0	0	2.25e-06	0	0	0	0	0	0	0	0	0	0	0	0	0	0	0	0	0	0	0	0	6.9e-07	0	0	0	1.25e-06	0	0	0	0	3.1e-06	0	0	0	0	0	0	6.15e-07	0
K01220_6-phospho-beta-galactosidase	1.37e-05	1.4e-05	2.83e-05	0	4.8e-06	3.05e-06	0	1.4e-05	7.69e-05	1.54e-05	7.51e-06	3.62e-05	2.09e-05	6.44e-06	7.11e-06	8.4e-06	6.95e-06	1.26e-05	3.76e-06	0	4.94e-06	1.08e-05	0	1.57e-05	1.36e-05	3.36e-05	1.05e-05	1.09e-05	6.18e-06	8.37e-05	7.14e-06	3.05e-05	1.22e-05	1.18e-05	1.8e-05	2.31e-05	1.8e-05	0	2.36e-05	5.33e-06	8.56e-06	4.75e-06	1.28e-05	4.85e-06	0	1.32e-05	4.22e-06	1.35e-05
K01222_6-phospho-beta-glucosidase	4.9e-06	9.98e-06	0	0	0	1.59e-06	0	1.45e-05	4.56e-06	0	0	1.88e-05	4.78e-06	0	0	0	5.23e-05	0	1.17e-05	9.55e-06	4.9e-06	0	0	5.62e-06	0	2.54e-06	9.54e-06	0	4.58e-06	6.82e-06	6.09e-06	5.79e-06	6.05e-06	3.07e-06	2.98e-06	6.13e-06	1.86e-05	9.14e-06	4.02e-05	1.09e-05	1.74e-05	0	1.33e-05	6.77e-06	1.04e-05	2.77e-06	0	9.39e-06
K01223_6-phospho-beta-glucosidase	0.000215128	0.000611595	0.000223579	0.000309017	0.000239836	0.000107986	0.00019336	0.000332794	0.000318055	0.000372589	0.000253255	0.000668949	0.000344465	0.00014189	0.000360367	0.000150432	0.000355087	0.00022065	0.000439544	0.000226267	0.000172519	0.000172344	0.000177609	0.000275565	0.000467323	0.00057063	0.000503857	0.000872097	0.000219651	0.0002443	0.000202663	0.000395217	0.00041647	0.000222115	0.000386737	0.0002878	0.000423489	0.000735919	0.0020501	0.000240135	0.000580761	0.000273272	0.000637239	0.00106383	0.0004928	0.000157348	0.00018323	0.000361492
K01224_arabinogalactan_endo-1,4-beta-galactosidase	7.74e-05	2.43e-05	1.76e-05	2.85e-05	4.04e-05	6.39e-06	1.03e-05	3.07e-05	1.29e-05	4.27e-05	4.96e-05	6.36e-05	0.000163342	7.29e-06	5.37e-05	9.44e-05	3.03e-05	3.3e-05	3.82e-05	2.53e-05	2.92e-05	4.41e-05	3.41e-05	8.53e-05	0.000100824	4.07e-05	0.000139406	3.07e-05	4.97e-05	5.53e-05	5.17e-05	6.26e-05	0.000103034	6.56e-05	3.13e-05	8.23e-06	6.48e-05	1.81e-05	0.00014049	2.7e-05	0.000146472	4.54e-05	8.14e-06	0.000197679	8.17e-05	2.15e-05	3.76e-05	1.86e-05
K01225_cellulose_1,4-beta-cellobiosidase	0	1.23e-06	1.46e-05	1.36e-05	2.21e-06	3.49e-06	2.06e-06	4.81e-06	2.06e-06	9.15e-06	3.37e-06	1.25e-05	7.58e-06	6.35e-06	1.68e-05	2.04e-05	1.61e-05	3.78e-06	3.4e-05	4.1e-06	2.23e-06	2.89e-05	4.5e-06	5.22e-06	1.4e-05	5.45e-06	0	2.5e-06	8.15e-07	6.12e-06	1.08e-06	8.56e-06	0	2.69e-06	2.12e-06	7.96e-06	3.41e-05	1.6e-05	0	1.5e-05	3.84e-06	1.56e-05	5.78e-06	2.19e-06	3.8e-06	6.01e-06	3.39e-06	1.29e-05
K01226_trehalose-6-phosphate_hydrolase	3.37e-05	3.28e-05	2.75e-05	1.46e-05	2.09e-05	5.52e-06	3.74e-06	1.83e-05	3.65e-06	6.31e-06	0	3.64e-05	1.5e-05	1.65e-05	4.23e-05	7.33e-06	5.9e-06	2.77e-05	2.6e-05	1.6e-05	1.17e-05	5.99e-06	6.22e-06	1.38e-05	1.77e-05	3.57e-05	2.07e-05	1.84e-05	1.13e-05	1.63e-05	2.96e-05	3.2e-05	1.65e-05	1.57e-05	3.23e-05	9.89e-06	8.96e-06	3.91e-05	0.000108303	8.21e-06	3.82e-05	9.13e-06	2.1e-05	3.64e-05	1.97e-05	4.96e-06	9.91e-06	2.88e-05
K01227_mannosyl-glycoprotein_endo-beta-N-acetylglucosaminidase	0	0	0	0	0	0	0	0	0	0	0	0	0	0	0	0	0	0	0	0	0	0	2.9e-06	0	0	0	0	0	0	0	0	0	0	0	0	0	0	0	0	0	0	0	0	0	0	0	0	0
K01228_mannosyl-oligosaccharide_glucosidase	0	0	0	2.44e-06	0	0	0	0	0	0	0	0	0	0	0	0	0	0	0	0	0	0	0	0	0	0	0	0	0	0	0	0	0	0	0	0	0	0	0	0	0	0	0	0	0	0	1.19e-06	0
K01229_lactase-phlorizin_hydrolase	0	0	0	0	0	0	0	1.18e-06	0	0	0	1.1e-06	0	0	0	1.1e-06	0	0	0	0	1.2e-06	0	0	0	0	0	0	0	0	0	1.29e-07	0	0	0	1.56e-07	1.19e-07	0	0	0	0	2.09e-06	0	0	0	0	0	0	0
K01230_mannosyl-oligosaccharide_alpha-1,2-mannosidase	0	0	0	0	0	0	0	0	0	0	0	0	0	0	5.24e-06	0	1.61e-06	1.5e-06	0	0	0	0	6.69e-06	0	0	0	0	0	0	0	0	0	0	0	0	1.59e-06	0	0	0	0	0	0	0	0	0	0	1.55e-06	0
K01231_alpha-mannosidase_II	0	3.61e-07	0	3.84e-06	0	0	0	1.42e-06	0	0	0	0	0	0	2.82e-06	0	0	0	0	0	0	0	0	0	0	0	0	0	0	0	4.77e-07	0	0	0	0	0	0	0	0	0	0	0	0	0	0	0	6.58e-07	0
K01232_maltose-6'-phosphate_glucosidase	2.42e-05	7.88e-05	2.01e-05	2.03e-05	2.6e-05	1.63e-05	2.42e-05	7.48e-05	6.25e-05	7.44e-05	7.9e-05	5.28e-05	4.69e-05	2.07e-05	3.8e-05	0	1.87e-05	1.78e-05	3.61e-05	4.83e-06	1.58e-05	4.54e-05	2.44e-05	3.32e-05	6.62e-05	0.00011782	8.71e-05	3.54e-05	2.99e-05	1.37e-05	2.46e-05	3.96e-05	5.76e-05	3.78e-05	5.81e-05	0.000113139	5.73e-05	2.76e-05	0.000239884	2.85e-05	2.71e-05	3.5e-05	4.76e-05	6.48e-05	6.54e-05	3.64e-05	3.73e-05	4.77e-05
K01234_neopullulanase	3.5e-06	1.78e-06	1.25e-06	0	0	0	0	2.83e-06	7.25e-06	8.13e-06	4.09e-06	0	4.88e-06	0	1.57e-05	2.26e-05	5.53e-06	2.3e-06	2.08e-06	0	0	0	0	0	5.7e-06	3.79e-06	2.31e-06	0	7.07e-07	0	2.41e-06	1.88e-06	1.54e-06	1.14e-06	5.78e-07	1.06e-06	5.8e-06	0	3.65e-06	3.18e-06	6.95e-06	3.63e-06	0	3.74e-06	1.32e-06	0	0	3.61e-06
K01235_alpha-glucuronidase	0.000283097	8.83e-05	0.000223782	0.000378787	0.00016224	0.000244519	0.000187102	0.000255739	0.000133282	0.000212425	0.00016616	0.000185378	0.000580206	0.000177153	0.000388155	0.000263058	0.000438912	0.000124725	0.000408422	0.000294297	0.000219242	0.000170816	0.000281394	0.000396678	0.0001826	0.000319112	0.000752624	0.000256393	0.00040249	0.000246931	0.000195322	0.000217529	0.00023398	0.000371629	0.00017061	0.000322573	0.000593099	0.000408996	0.000543399	0.000163873	0.000205598	0.000121367	6.91e-05	0.000323427	0.000247934	0.000108007	0.000262131	0.000133256
K01236_maltooligosyltrehalose_trehalohydrolase	0	0	0	3.9e-06	3.8e-06	0	0	0	0	0	0	0	0	0	0	0	1.13e-05	0	0	0	2.62e-06	4.39e-06	0	4.18e-06	2.13e-06	9.36e-07	1.21e-06	0	2.01e-06	0	4.76e-07	3.24e-07	0	0	1.09e-06	4.46e-06	0	3.45e-06	0	4.31e-06	0	0	0	0	0	0	8.62e-07	7.22e-06
K01238	0.000377484	0.00110586	0.000357644	0.000152841	0.000345899	0.00040427	0.000170053	0.00053187	0.000529594	0.000579496	0.000350349	0.000587866	0.000321076	0.000141294	0.000144288	5.78e-05	7.08e-05	0.000498542	6.84e-05	0.000347597	0.00045852	0.000500876	0.000254583	0.000117904	0.000540072	0.000566772	0.000390463	0.000342543	0.000482497	0.000524498	0.000227146	0.000539661	0.000386223	0.00047826	0.000512266	0.000157879	6.42e-05	0.000237058	0.000104153	0.000480829	0.000200569	0.000270473	0.000655896	0.000258757	0.000371846	0.000659764	0.000196487	0.000589879
K01239_purine_nucleosidase	0.000453998	0.00115393	0.000548521	0.000101576	0.000415789	0.000579505	0.000273886	0.00093943	0.000811184	0.000881656	0.000481715	0.00091086	0.000292501	7.94e-05	0.000220795	1.27e-05	9.1e-06	0.000829466	3.45e-05	0.000644313	0.000680728	0.000506934	0.000292254	0.000158434	0.000663431	0.000890863	0.000420221	0.000542195	0.000820776	0.000503121	0.00035064	0.000968037	0.000510165	0.000907831	0.000770646	0.000126156	3.73e-05	0.000264428	4.63e-05	0.000694738	0.000222972	0.000449837	0.00100905	0.000221091	0.000682356	0.00108756	0.000234624	0.000780656
K01241_AMP_nucleosidase	3.3e-05	5.72e-06	2.86e-05	1.76e-05	0.000151371	9.14e-05	5.8e-05	1.94e-05	8.28e-06	1.41e-05	0.000135283	8.25e-06	3.4e-05	0.000241617	4.59e-05	0.000487986	0.000120172	7.24e-05	2.03e-05	7.41e-05	8.07e-05	6.86e-05	0.000108316	7.14e-05	0	8.8e-06	5.45e-06	1.95e-05	5.97e-05	0	0.000124178	3.29e-05	1.4e-05	5.41e-06	0.000126797	0.00010136	7.18e-05	7.88e-05	4.48e-06	0.000272375	4.6e-05	0.000110893	1.17e-05	2.65e-05	8.27e-05	4.8e-06	8.67e-05	5.32e-05
K01243_S-adenosylhomocysteine/5'-methylthioadenosine_nucleosidase	0.000374531	0.000545759	0.000290582	7.77e-05	0.000303541	0.000331967	0.000147051	0.000644666	0.000567336	0.000405318	0.000193583	0.000489095	0.000253068	0.000173206	7.16e-05	5.16e-05	2.84e-05	0.000444283	7.06e-05	0.000237818	0.000464291	0.000365626	0.000120385	4.19e-05	0.00047427	0.000401041	0.000232076	0.000354896	0.000516445	0.000410786	0.000222404	0.000531796	0.000271897	0.000486489	0.000375065	9.41e-05	4.37e-05	0.000193301	9.64e-05	0.000289766	0.000191075	0.000216491	0.000524002	0.000313556	0.000414168	0.000558936	0.000115124	0.000278777
K01246_DNA-3-methyladenine_glycosylase_I	0.000214705	6.66e-05	0.000172405	3.62e-05	0.000146346	6.46e-05	0.000215401	0.000141294	1.11e-05	0.000144751	0.000147683	0.000135278	0.000278684	0.000127316	0.000499362	0.000167211	0.000331122	0.000113765	0.000498781	0.000214346	7.34e-05	9.44e-05	0.000192652	0.00022007	0.000169849	0.000208426	0.000238445	0.000191288	0.000144744	0.000143186	8.39e-05	0.000101935	7.18e-05	9.95e-05	6.95e-05	9.14e-05	0.000239646	0.000182439	0.000223402	9.27e-05	0.000273971	0.000152072	7.96e-05	0.000168916	0.000101092	5.24e-05	0.000314964	0.000133563
K01247_DNA-3-methyladenine_glycosylase_II	3.81e-05	0.000121622	0.000117769	3.05e-05	0.000101391	0.000101841	5.64e-05	5.95e-05	0.000131657	5.71e-05	4.69e-05	0.000111621	6.89e-05	0.000161075	0.000104577	0.000158845	7.95e-05	9.58e-05	0.000167456	0.000170357	8.99e-05	7.84e-05	8.49e-05	2.19e-05	0.000199547	0.000166313	0.000111698	0.000255402	5.71e-05	0.000121832	7.79e-05	0.000137829	0.000168515	7.14e-05	0.000114072	0.000100902	0.000164872	0.000233572	0.000236574	0.000204008	0.000177295	0.000176511	0.00017342	0.000212793	0.000109424	9.91e-05	0.00013118	0.000131051
K01249_DNA_glycosylase	1.69e-05	4.23e-05	1.64e-05	6.12e-06	1.46e-05	1.59e-05	1.36e-05	2.9e-05	1.35e-05	3.18e-05	1.11e-05	3.37e-05	2.26e-05	8.17e-06	0	0	0	1.87e-05	0	2.02e-05	1.1e-05	2.4e-05	6.82e-06	1.16e-05	1.83e-05	1.61e-05	2.67e-05	1.65e-05	2.82e-05	1.91e-05	9.32e-06	3.14e-05	1.44e-05	2.87e-05	2.2e-05	7.18e-06	0	1.29e-05	0	1.2e-05	0	3.5e-06	5.23e-05	3.61e-06	1.25e-05	2.35e-05	5.54e-06	4.67e-05
K01250_pyrimidine-specific_ribonucleoside_hydrolase	0	0	0	0	0	0	0	0	0	0	0	0	0	0	0	0	0	0	0	0	0	0	6.56e-06	0	0	0	0	0	0	0	4.4e-06	1.21e-06	0	0	2.14e-06	0	0	0	0	0	0	0	0	0	0	0	0	0
K01251_adenosylhomocysteinase	0.000240397	0.000297407	0.000426916	0.000241936	0.000545952	0.000496187	0.000146424	0.000187353	0.000243873	0.000402427	0.000172506	0.000246915	8.05e-05	0.000347215	0.000177552	0.000327409	0.000197241	0.000537818	0.000251501	0.000310745	0.000273507	0.000670341	0.000558731	0.000219056	0.000310689	0.000139021	0.000178859	0.000142478	0.000208793	0.000163646	0.000518657	0.000161321	0.000138495	0.000235709	0.000484351	0.000642653	0.000544794	0.000163066	0.000124571	0.00092983	0.000511314	0.000434404	0.000401052	0.000312293	0.000289625	0.000262763	0.000634375	0.000560313
K01252_enterobactin_isochorismatase	0	0	0	0	0	0	0	0	0	0	0	0	0	0	0	0	0	0	0	0	0	0	0	0	0	0	0	2.03e-05	0	0	1.96e-06	6.63e-07	0	0	0	3.19e-06	0	0	0	0	0	0	0	0	0	0	0	0
K01253_microsomal_epoxide_hydrolase	0	0	0	0	0	0	0	0	0	0	0	0	0	0	0	0	3.61e-06	0	0	0	0	0	0	0	0	0	0	0	2.11e-06	0	0	0	0	0	0	0	0	0	0	0	8.77e-06	0	0	0	0	0	0	0
K01254_leukotriene-A4_hydrolase	0	3.78e-07	0	0	0	0	0	0	0	0	0	0	0	0	0	0	0	0	0	0	0	0	0	0	0	0	0	0	0	0	0	0	0	0	5.01e-07	0	0	0	0	0	0	0	0	0	0	0	0	0
K01255_leucyl_aminopeptidase	4.22e-05	3.08e-05	5.55e-05	7.28e-05	8.45e-05	8.29e-05	3.52e-05	5.76e-05	0.000109413	3.15e-05	1.75e-05	3.74e-05	5.3e-05	1.09e-05	9.93e-05	4.72e-05	3.58e-05	4.02e-05	5.19e-05	2.13e-05	5.87e-05	5.36e-05	3.17e-05	3.98e-05	2.86e-05	5.71e-05	2.38e-05	9.69e-05	2.63e-05	7.41e-05	3.13e-05	3.14e-05	6.42e-05	2.68e-05	7.25e-05	4.36e-05	4.04e-05	3.16e-05	3.96e-05	5.79e-05	5.91e-05	7.25e-05	5.64e-05	5.18e-05	2.31e-05	3.69e-05	6.06e-05	3.73e-05
K01256_aminopeptidase_N	0.000404644	0.00100364	0.000404936	0.000291268	0.000412937	0.000397694	0.000206905	0.000619715	0.000544315	0.00064737	0.00034012	0.000594144	0.000264818	8.27e-05	0.000166844	4.39e-05	2.07e-05	0.000543835	6.96e-05	0.000376197	0.000488555	0.000431234	0.000291561	0.000138457	0.000644888	0.000518268	0.000362318	0.000286511	0.000495792	0.000578353	0.000275676	0.000633287	0.0003626	0.000589812	0.000529628	8.25e-05	8.71e-05	0.000193901	2.06e-05	0.000412853	0.00015114	0.000276548	0.000783521	0.000216931	0.000378726	0.00080758	0.000168717	0.000509081
K01257_cystinyl_aminopeptidase	0	0	7.66e-08	0	0	0	0	0	0	0	0	0	0	0	0	0	0	0	0	2.17e-06	0	0	0	1.53e-07	0	0	5.15e-07	0	5.54e-08	0	0	6.12e-09	0	1.79e-07	1.14e-08	0	0	0	0	0	0	0	0	0	0	0	0	0
K01258_tripeptide_aminopeptidase	0.00087462	0.000282184	0.000722581	0.00112248	0.00087056	0.00102855	0.00122511	0.000696985	0.000936909	0.000647314	0.000964687	0.000724165	0.00103099	0.00140875	0.00102005	0.000686499	0.00116268	0.000670311	0.000916048	0.000960564	0.000718566	0.000794316	0.000929918	0.000975534	0.000582919	0.000806005	0.000941178	0.000800812	0.000889348	0.000567204	0.00127778	0.00063607	0.000772997	0.000652946	0.000719333	0.00126617	0.00106812	0.000904557	0.000882213	0.000903669	0.000726064	0.000970481	0.000395942	0.000702535	0.00104988	0.000517484	0.000995334	0.000540406
K01259_proline_iminopeptidase	0.000269648	0.000709183	0.000372374	5.55e-05	0.00021079	0.00031664	0.000123935	0.000393104	0.000386355	0.000519669	0.000352477	0.000330259	0.000280245	6.02e-05	0.000216609	7.44e-05	0.000161523	0.000364007	0.000121159	0.000206729	0.000339177	0.000368877	0.000210943	0.000111649	0.000414593	0.000502153	0.000339228	0.000220983	0.000425651	0.000411956	0.00018721	0.000498545	0.000278803	0.00047873	0.000391371	0.000131799	0.000131206	0.000243299	0.000153367	0.000262661	0.000266204	0.000104083	0.000641778	0.000272705	0.000353503	0.000621605	0.000190965	0.000373985
K01260_aminopeptidase_B	0	2.67e-07	0	0	0	0	0	0	0	0	0	0	0	0	0	0	0	0	0	0	0	0	0	3.77e-06	0	0	0	0	0	0	0	0	0	0	0	0	0	0	0	0	0	0	0	0	0	0	0	0
K01261_glutamyl_aminopeptidase	1.81e-05	7.18e-06	0	0	0	2.02e-06	0	0	0	0	0	0	0	0	0	0	0	0	1e-05	0	0	0	0	0	0	3.19e-06	1.24e-08	0	0	8.49e-06	0	5.86e-06	0	6.47e-09	1.8e-09	0	4.72e-06	0	6.27e-06	0	0	0	0	0	0	0	0	0
K01262_X-Pro_aminopeptidase	0.00107422	0.00135302	0.000876004	0.0010868	0.000921608	0.00132552	0.000861651	0.00155669	0.000986891	0.00135634	0.000926613	0.00125536	0.0018006	0.000673815	0.00121706	0.000455829	0.00120139	0.000861795	0.00125337	0.000991705	0.00126463	0.000865202	0.000998977	0.00100821	0.001192	0.00169385	0.00182653	0.00138344	0.0015459	0.00105331	0.000663401	0.00144032	0.00135504	0.00141762	0.00103873	0.00110523	0.000982125	0.000961848	0.00156565	0.00102937	0.000761386	0.000855526	0.00121917	0.00120054	0.00139299	0.00151174	0.000987524	0.000920114
K01263_cytosol_alanyl_aminopeptidase	0	0	0	0	0	0	0	0	0	0	0	0	0	0	0	0	0	0	0	2.5e-08	0	0	0	5.4e-08	0	1.39e-07	7.17e-08	0	9.43e-09	0	1.1e-07	4.24e-09	0	3.38e-08	6.03e-09	0	3.97e-06	0	0	0	4.69e-06	0	0	0	0	0	0	1.73e-07
K01264_aminopeptidase_Y	0	0	0	0	0	0	0	0	0	0	0	0	0	0	0	0	0	0	0	0	0	0	0	0	0	0	0	0	0	0	0	0	0	0	0	1.66e-06	0	0	0	0	0	0	0	0	0	0	0	0
K01265_methionyl_aminopeptidase	0.00190587	0.00151428	0.0012423	0.0020003	0.0015486	0.00181407	0.00164913	0.00203682	0.00147948	0.00159761	0.0013962	0.0015558	0.00294491	0.00181126	0.00236505	0.00129138	0.00210863	0.00159066	0.00204551	0.00183519	0.00163953	0.00120928	0.00182956	0.00174578	0.00169285	0.00216392	0.00251392	0.00180479	0.00219947	0.00115635	0.0015176	0.00200546	0.00218333	0.00180824	0.00169652	0.00168496	0.00177713	0.00185507	0.00238894	0.00194734	0.00166868	0.00150774	0.00119253	0.00184376	0.00228749	0.00199772	0.00159676	0.00134545
K01266_D-aminopeptidase	0	1.16e-06	0	0	0	0	0	0	0	0	0	0	0	0	0	0	0	0	0	0	0	0	0	0	3.51e-06	3.1e-06	0	0	0	0	7.48e-07	1.55e-06	2.49e-06	0	1.94e-06	0	0	0	0	0	0	0	8.23e-06	0	0	0	0	0
K01267_aspartyl_aminopeptidase	1.52e-06	7.4e-07	3.33e-06	3.25e-06	0	3.76e-06	4.82e-06	0	0	0	7.87e-06	0	0	6.83e-06	0	0	0	0	0	9.57e-06	5.21e-06	5.73e-06	0	0	0	2.54e-06	6.33e-06	0	1.87e-06	1.36e-05	0	4.08e-06	1.85e-06	2.89e-06	1.52e-06	1.23e-05	3.79e-06	4.57e-06	5e-06	5.67e-06	0	0	0	0	5.07e-06	2.79e-06	2.25e-06	0
K01269_aminopeptidase	0.000268081	0.00018954	0.000275618	0.000313155	0.000252054	0.000410239	0.000311936	0.000238091	0.000398355	0.00021063	0.000286718	0.000174011	0.000213793	0.000250374	0.000455355	0.000383004	0.000356459	0.000243612	0.000288534	0.000318784	0.00021756	0.000319591	0.000338842	0.000357413	0.000299424	0.000192805	0.000166142	0.000707031	0.000167289	0.000431493	0.00027231	0.000185142	0.000264505	0.000156356	0.000244527	0.000309638	0.000256871	0.000290702	0.000247119	0.000288668	0.000712625	0.000353452	0.000346573	0.000375568	0.000243503	0.000186872	0.000303071	0.000312647
K01270_aminoacylhistidine_dipeptidase	0.000333876	9.68e-05	0.000223998	0.000483116	0.000231833	0.000348204	0.000331209	0.000261159	0.00014987	0.000256137	0.000288857	0.000211649	0.000527491	0.000463118	0.000326336	0.000326081	0.000447959	0.000262761	0.000375122	0.00028446	0.000301044	0.000228247	0.000298443	0.000404383	0.00017459	0.000471963	0.000507092	0.000399827	0.000352711	0.000156569	0.00031648	0.00024462	0.000262845	0.000267602	0.000208514	0.000445546	0.000426659	0.000246299	0.00046302	0.000275986	0.000238783	0.000305128	6.81e-05	0.000253654	0.000416236	0.000258399	0.000356278	0.000207567
K01271_X-Pro_dipeptidase	2.86e-05	4.8e-05	5.06e-05	4.86e-05	3.28e-05	1.88e-05	3.89e-05	1.47e-05	3.55e-05	3.02e-05	2.14e-05	4.24e-05	8.73e-06	2.53e-05	2.98e-05	9.41e-06	1.14e-05	1.58e-05	1.02e-05	2.79e-05	6.35e-06	2.23e-05	4.16e-05	1.98e-05	5.24e-05	3.22e-05	2.72e-05	2.76e-05	2.18e-05	4.01e-05	2.21e-05	3.96e-05	5.34e-05	5.96e-06	3.54e-05	2.35e-05	3.15e-05	8.04e-05	5.65e-05	5.36e-05	3.1e-05	1.1e-05	4.09e-05	3.17e-05	1.23e-05	3.17e-05	2.02e-05	1.29e-05
K01273_membrane_dipeptidase	1.23e-05	1.47e-05	4.27e-06	0	0	0	0	9.6e-06	0	0	0	3.68e-05	2.85e-05	0	9.7e-06	0	0	0	0	6.14e-06	0	0	0	7.07e-06	1.36e-05	9.27e-06	1.01e-05	1.5e-05	5.58e-06	8.69e-06	8.09e-07	8.17e-06	1.84e-05	6.03e-06	8.78e-06	4.8e-06	4.87e-06	0	0	7.18e-06	0	0	8.65e-06	7.03e-06	1.62e-05	0	1.44e-06	1.82e-05
K01274_D-alanyl-D-alanine_dipeptidase	2.97e-06	9.74e-07	3.17e-06	0	0	2.73e-07	0	0	0	0	0	1.82e-06	0	0	7.21e-06	0	0	0	0	0	0	0	1.15e-06	0	0	0	0	2.78e-06	8.83e-07	3.23e-06	0	3.52e-06	1.94e-06	0	9e-07	0	7.22e-07	0	4.75e-06	0	0	0	0	4.89e-06	0	0	0	1.8e-06
K01275_cathepsin_C	4.69e-06	0	0	0	0	0	0	0	0	0	0	0	0	0	0	0	0	0	0	0	0	0	0	0	0	0	0	0	0	0	0	0	0	0	0	0	0	0	0	0	0	0	0	0	0	0	2.12e-06	0
K01277_dipeptidyl-peptidase_III	0.00022937	5.67e-05	0.000192438	0.000231172	0.000249459	0.000261834	0.000327651	0.000246659	0.000146347	0.000132154	0.000225232	0.000173993	0.000329945	0.000346953	0.000282876	0.000207194	0.000298279	0.000177606	0.000276187	0.000204551	0.000211504	0.000174302	0.00031719	0.0002329	0.000123474	0.000222284	0.000330449	0.000182891	0.00026225	0.000176508	0.000335119	0.000175373	0.000277649	0.000177101	0.000217278	0.000326152	0.00024279	0.000164247	0.000233891	0.000422008	0.000199992	0.000209465	7.14e-05	0.000165564	0.000313779	0.000137062	0.000300968	0.000166488
K01278_dipeptidyl-peptidase_4	0.000871912	0.00100207	0.00070876	0.00078539	0.000899596	0.00104996	0.000734056	0.00115969	0.000820674	0.000980299	0.000817789	0.00103241	0.00124696	0.000757106	0.000971456	0.000277946	0.000748964	0.000716058	0.000857692	0.000839634	0.000970558	0.000775488	0.000741707	0.000725141	0.000818317	0.00113915	0.00123436	0.000835074	0.00123203	0.000682806	0.000658851	0.00102258	0.000882387	0.000959925	0.000808494	0.000951281	0.00072931	0.000631048	0.00083756	0.000815572	0.000524735	0.000662301	0.00103276	0.000661344	0.00096984	0.00106159	0.000703427	0.000711451
K01279_tripeptidyl-peptidase_I	0	0	2.25e-06	0	0	0	0	0	0	0	0	0	0	0	0	0	0	0	0	0	0	0	0	0	0	0	0	0	0	0	0	0	0	0	0	0	0	0	0	0	0	0	0	0	0	0	0	0
K01280_tripeptidyl-peptidase_II	0	0	0	0	0	0	0	0	0	0	0	0	0	0	0	0	0	1.39e-06	0	0	0	0	0	0	9.54e-07	0	0	0	0	0	0	1.41e-07	0	0	0	0	0	0	0	0	0	0	0	0	0	0	0	0
K01281_X-Pro_dipeptidyl-peptidase	1.13e-05	9.42e-06	1.87e-05	0	2.85e-06	0	2.67e-06	4.28e-06	0	2.41e-06	0	0	0	0	4.46e-06	0	0	2.59e-06	0	1.35e-05	0	0	0	3.23e-06	0	3e-06	0	6.85e-06	1.26e-06	7.95e-06	3.16e-06	3.97e-06	0	0	0	0	6.56e-06	2.5e-06	3.71e-06	6.45e-06	2.03e-05	2.76e-06	0	0	3.32e-06	0	1.98e-06	8.33e-06
K01282_dipeptidyl_aminopeptidase	0	0	0	0	0	0	0	0	0	0	0	0	0	0	0	0	1.76e-06	0	1.9e-06	0	0	2.69e-06	0	0	0	0	0	0	0	0	2.99e-07	0	0	0	0	0	0	2.17e-06	0	0	0	0	0	0	0	0	0	0
K01283_peptidyl-dipeptidase_A	0	0	0	0	0	0	0	0	0	0	0	0	0	0	0	0	0	0	0	0	0	0	0	0	0	0	0	0	2.47e-06	0	0	8.56e-07	0	0	3.12e-07	1.39e-06	0	0	3.59e-06	0	0	0	0	0	0	0	8.15e-07	0
K01284_peptidyl-dipeptidase_Dcp	0.000697773	0.000179426	0.000497894	0.00064063	0.000482139	0.00059738	0.00067708	0.000532154	0.000355835	0.000442048	0.000388393	0.000450739	0.000975244	0.000549789	0.000923879	0.000538407	0.00077495	0.000400451	0.00084381	0.000650143	0.000476121	0.000463057	0.000560093	0.000655682	0.000375438	0.000650241	0.000859029	0.00064225	0.000685839	0.000388279	0.00051908	0.000515569	0.000680265	0.000487582	0.000291882	0.000697612	0.00082633	0.00044312	0.000926798	0.000372513	0.000554303	0.000442442	0.000219841	0.000535844	0.000597497	0.000462502	0.000709824	0.000409214
K01285_lysosomal_Pro-X_carboxypeptidase	0	0	0	0	0	0	0	0	0	0	0	0	0	0	0	0	0	0	0	0	0	0	0	0	0	0	0	0	0	0	0	0	0	0	0	0	0	0	0	0	0	0	0	0	0	0	4.08e-06	0
K01286_D-alanyl-D-alanine_carboxypeptidase	0	7.34e-06	3.19e-06	0	4.96e-06	0	0	0	9.2e-06	1.18e-05	0	9.18e-06	1.42e-05	5e-06	0	2.56e-05	9.35e-06	0	1.78e-05	0	0	0	0	5.33e-06	2.76e-06	2.46e-06	0	1.12e-05	7.16e-06	1.7e-05	4.58e-06	8.24e-06	0	8.13e-07	7.78e-06	2.19e-06	1.97e-06	3.04e-05	9.68e-06	0	0	5.38e-06	0	1.47e-05	1.46e-05	0	1.08e-06	4.79e-06
K01292_carboxypeptidase_N	0	0	0	0	0	0	0	0	0	0	0	4.72e-06	0	0	6.22e-06	0	0	0	0	0	0	0	0	0	0	0	0	0	0	0	0	0	0	0	0	0	0	0	0	0	0	0	0	0	0	0	0	0
K01295_glutamate_carboxypeptidase	0	0	7.72e-06	0	0	0	0	0	5.72e-06	0	9.39e-06	0	1.46e-05	0	8.77e-06	0	0	5.26e-06	0	0	1.22e-05	0	5.58e-06	0	0	0	1.83e-06	2.71e-05	1.41e-05	0	2.99e-06	5.01e-06	0	0	0	2.43e-06	0	1.59e-05	0	0	0	1.19e-05	0	0	0	0	1.34e-06	0
K01296_carboxypeptidase_M	0	0	0	0	0	0	0	0	0	0	0	0	0	0	7.6e-06	0	0	0	0	4.81e-06	0	0	0	0	0	0	0	0	0	0	0	0	0	0	0	0	0	0	0	0	0	0	0	0	0	0	0	0
K01297_muramoyltetrapeptide_carboxypeptidase	0	1.4e-06	0	7.61e-06	7.37e-06	0	0	0	0	0	0	0	0	0	0	0	0	0	1.16e-05	0	1.5e-05	0	0	0	0	0	0	0	0	0	3.69e-06	0	0	0	2.23e-06	0	0	6.74e-06	0	8.29e-06	0	0	0	0	0	0	0	0
K01298_carboxypeptidase_A2	0	0	2.03e-06	0	0	0	0	0	0	0	0	0	0	0	0	0	0	0	0	0	0	0	0	0	0	0	0	0	0	0	0	0	0	0	0	0	0	0	0	0	0	0	0	0	0	0	0	0
K01299_carboxypeptidase_Taq	4.26e-06	3.38e-06	2.93e-06	9.09e-06	4.62e-06	7.1e-06	0	0	0	7.34e-06	6.98e-06	1.28e-05	0	0	0	0	1.33e-05	1.56e-05	7.15e-06	2.12e-05	4.48e-06	5.06e-06	8.65e-06	9.88e-06	1.79e-05	9.08e-06	1.41e-06	1.04e-05	9.17e-06	2.42e-05	2.8e-06	1.52e-06	0	1.42e-06	8.81e-06	5.5e-06	1.01e-05	0	4.44e-06	0	8.06e-06	4.44e-06	1.2e-05	9.01e-06	0	0	1.98e-06	0
K01301_glutamate_carboxypeptidase_II	0	4.5e-07	0	0	0	0	0	0	0	0	0	0	0	0	0	0	2.23e-06	0	0	0	0	0	0	0	0	0	0	0	0	0	0	0	0	0	0	0	0	0	0	0	0	2.84e-06	0	0	0	0	1.3e-06	0
K01303_acylaminoacyl-peptidase	1.29e-05	4.53e-06	4.52e-06	0	0	7.64e-06	3.25e-06	0	0	2.77e-06	1.08e-05	1.24e-05	1.69e-06	1.39e-05	0	6.02e-06	4.99e-06	5.93e-06	7.71e-06	9.69e-06	0	1.91e-05	1.31e-05	3.71e-06	7.77e-06	1.7e-06	3.21e-06	7.8e-06	9.25e-07	9.27e-06	1.79e-05	3.73e-06	1.11e-05	0	8.18e-06	1.52e-05	4.1e-05	1.54e-05	6.97e-06	3.78e-06	0	2.03e-05	0	7e-06	3.42e-06	1.88e-06	1.27e-05	1.59e-05
K01304_pyroglutamyl-peptidase	0.000301003	0.00067897	0.000266441	6e-05	0.000253653	0.000330542	0.000132528	0.000384027	0.000367117	0.000556362	0.000169808	0.000469391	0.000280367	4e-05	5.86e-05	0	2.24e-05	0.000357905	8.37e-06	0.000319781	0.000350058	0.000326145	0.000123694	5.48e-05	0.00052675	0.000398619	0.000213646	0.000368133	0.000443864	0.000359417	0.000188087	0.000520413	0.000252528	0.000508459	0.000432083	5.24e-05	0	0.000172172	1.96e-05	0.000359309	7.19e-05	0.000206812	0.000679973	0.000158504	0.000229114	0.000506522	0.000137029	0.000362544
K01305_beta-aspartyl-peptidase	0	1.09e-06	0	0	1.18e-05	0	0	0	0	0	0	0	0	0	0	0	0	5.07e-06	0	0	1.19e-05	0	0	0	0	0	0	0	1.07e-06	0	6.47e-06	3.4e-06	2.33e-06	0	0	0	0	0	0	0	0	0	0	0	0	0	0	0
K01308_g-D-glutamyl-meso-diaminopimelate_peptidase	0	2.13e-06	0	0	0	0	0	0	5.36e-06	8.64e-06	8.28e-06	0	0	7.18e-06	0	9.36e-06	0	0	0	0	5.82e-06	6.34e-06	0	0	0	0	0	0	9.81e-07	0	1.33e-06	2.77e-06	2.15e-06	4.06e-06	3.3e-06	2.15e-06	3.99e-06	0	0	0	9.84e-06	0	0	5.73e-06	2.83e-06	6.23e-06	1.26e-06	4.99e-06
K01311_chymotrypsin_C	0	0	0	0	0	0	0	0	0	0	0	0	0	0	0	0	0	0	0	0	0	0	0	0	0	0	0	0	0	0	0	0	0	0	0	0	0	0	0	0	0	0	0	0	4.07e-06	0	0	0
K01312_trypsin	0	0	0	0	0	0	0	0	0	0	0	0	0	0	0	0	0	0	0	0	0	0	0	0	0	0	0	0	0	0	0	7.54e-07	0	0	0	0	0	0	0	0	0	0	0	0	0	0	0	0
K01313_coagulation_factor_II_(thrombin)	0	0	0	0	0	0	0	2.66e-06	0	0	0	0	0	0	0	0	0	0	0	0	0	0	0	0	2.01e-06	0	0	0	0	0	0	0	0	0	0	0	0	0	0	0	0	0	0	0	0	0	7.97e-07	0
K01315_plasminogen	0	0	0	0	0	0	0	0	0	0	0	0	0	0	0	0	0	0	7.19e-07	0	0	0	0	0	0	0	0	0	0	0	0	0	0	0	0	0	0	0	0	0	1.61e-06	0	0	0	0	0	0	0
K01316_protease,_serine,_7_(enterokinase)	0	0	0	0	0	0	0	0	0	0	0	0	0	0	0	0	0	0	0	0	0	3.03e-06	0	0	0	0	0	0	0	0	0	0	0	0	0	0	0	0	0	0	0	0	0	0	0	0	0	0
K01317_acrosin	0	0	0	0	0	0	0	0	0	0	0	0	0	0	8e-06	0	0	0	0	0	0	0	0	0	0	0	0	0	0	0	0	0	0	0	0	0	0	0	0	0	0	0	0	0	0	0	0	0
K01318_glutamyl_endopeptidase	0	5.95e-06	4.15e-06	0	0	2.82e-06	0	0	0	2.05e-05	0	1.7e-06	6.15e-06	0	0	1.18e-05	0	0	8.33e-06	0	0	0	0	0	3.59e-06	1.59e-05	0	1.46e-05	1.16e-06	0	1.57e-06	2.87e-06	0	3.91e-06	2.21e-06	5.09e-06	0	0	6.23e-06	0	0	0	8.41e-06	0	0	6.94e-06	3.74e-06	5.91e-06
K01320_coagulation_factor_VII	0	0	0	0	0	0	0	0	0	0	0	0	0	0	0	0	0	0	0	0	0	0	0	0	0	0	0	0	0	0	0	0	0	0	0	0	0	0	0	0	8.79e-06	0	0	0	0	0	0	0
K01321_coagulation_factor_IX_(Christmas_factor)	0	0	0	0	0	0	0	0	0	0	0	0	0	0	0	0	0	0	0	0	0	0	0	5.32e-06	0	0	0	0	0	0	0	0	0	0	0	0	0	0	0	0	0	0	0	0	0	0	1.08e-06	0
K01322_prolyl_oligopeptidase	0.000151773	2.41e-05	0.000119515	5.09e-05	0.000115648	5.9e-05	0.000152387	5.85e-05	7.74e-05	8.37e-05	6.36e-05	0.000133521	0.000356481	0.000144146	0.000281775	0.000104662	0.000316154	6.83e-05	0.00023555	0.000142329	0.000113248	6.35e-05	0.000104779	0.000122943	8.56e-05	6.17e-05	0.000241264	0.000109043	0.000234228	5.45e-05	9.92e-05	8.21e-05	3.68e-05	9.91e-05	2.32e-05	0.000110188	0.000169518	0.000158301	0.00022633	8.42e-05	0.000105468	8.64e-05	1.67e-05	0.000110806	0.000103806	6.75e-05	0.000120314	9.36e-05
K01323_coagulation_factor_XI	0	0	0	0	0	0	0	0	0	0	0	0	0	0	5.39e-06	0	0	0	2.85e-06	0	0	0	0	2.68e-06	0	0	0	0	0	0	0	0	0	0	0	0	0	0	0	0	0	0	0	0	0	0	0	0
K01324_plasma_kallikrein	0	0	0	0	0	0	0	0	0	0	0	0	0	0	0	0	0	0	0	0	0	0	0	3.7e-06	0	0	0	0	0	0	0	0	0	0	0	0	0	0	0	0	0	0	0	0	0	0	0	0
K01325_tissue_kallikrein	0	0	0	0	0	0	0	0	0	0	0	0	0	0	0	0	7e-06	0	0	0	0	0	0	0	0	0	0	0	0	0	0	0	0	0	0	0	0	0	0	0	0	0	0	0	0	0	2.13e-06	0
K01326_pancreatic_elastase_I	0	0	0	0	0	0	0	0	0	0	0	0	0	0	0	0	0	0	6.61e-06	0	0	0	0	0	0	0	0	0	0	0	0	0	0	0	0	0	0	0	0	0	0	0	0	0	0	0	0	0
K01327_leukocyte_elastase	0	0	0	0	0	0	3.8e-06	0	0	0	0	0	0	0	0	0	0	0	0	0	0	0	0	0	0	0	0	0	0	0	0	0	0	0	0	0	0	0	0	0	0	0	0	0	0	0	9.03e-07	0
K01328_coagulation_factor_XII_(Hageman_factor)	0	0	0	0	0	0	0	0	0	0	0	0	0	0	0	0	0	0	0	0	0	0	0	0	0	0	0	0	0	0	0	0	0	0	0	0	0	0	0	0	0	0	0	0	0	0	8.13e-07	0
K01330_complement_component_1,_r_subcomponent	0	0	0	0	0	0	0	0	0	0	0	0	0	0	0	0	0	0	0	0	0	0	3.05e-06	0	0	1.61e-06	0	0	0	0	0	0	0	0	0	0	0	0	0	0	0	0	0	0	0	0	0	0
K01331_complement_component_1,_s_subcomponent	0	0	0	0	0	0	0	0	0	0	0	3.09e-06	0	0	0	0	0	0	0	0	0	0	0	0	0	0	0	0	0	0	0	0	0	0	0	0	0	0	0	0	0	0	0	0	0	0	0	0
K01333_complement_factor_I	0	0	0	0	0	0	0	0	0	0	0	0	0	0	5.81e-06	0	0	0	0	0	0	0	0	0	0	0	0	0	0	0	0	0	0	0	0	0	0	0	0	0	0	0	0	0	0	0	0	0
K01334_component_factor_D	0	0	0	0	0	0	1.96e-06	3.04e-06	0	0	0	0	0	0	0	0	0	0	0	0	0	0	7.86e-06	0	0	0	0	0	0	0	0	0	0	0	0	0	0	0	0	0	0	0	0	0	0	0	4.56e-07	0
K01335_component_factor_B	0	0	0	0	0	0	0	0	0	0	0	0	0	0	0	0	0	0	0	0	0	0	0	0	0	0	0	0	0	0	0	0	0	0	0	0	0	0	0	0	3.15e-06	0	0	0	0	0	0	0
K01338_ATP-dependent_Lon_protease	0.00126431	0.000787168	0.00134435	0.00177817	0.0014151	0.00115729	0.00107802	0.000952238	0.00126337	0.000945654	0.00115272	0.00114128	0.00103243	0.00145407	0.0013803	0.00132394	0.00127781	0.000997547	0.00130887	0.00107101	0.000967639	0.00113935	0.00123623	0.00140846	0.00111996	0.00102586	0.0010797	0.00134232	0.00106804	0.00111815	0.00132486	0.000959702	0.0012162	0.00101798	0.00116478	0.00156906	0.00152565	0.00128261	0.00153106	0.000958287	0.00124826	0.00138344	0.000903044	0.00121415	0.0011533	0.000771924	0.00141545	0.00109417
K01340_tryptase	0	0	0	0	0	0	0	6.4e-06	0	0	0	0	0	0	0	0	0	0	0	0	0	0	0	0	0	0	0	0	0	0	0	0	0	0	0	0	0	0	0	0	0	0	0	0	0	0	0	0
K01341_kexin	0	0	0	0	0	0	0	0	0	0	0	0	0	0	0	5.02e-06	0	0	0	0	0	0	0	0	0	0	0	0	0	0	0	0	0	0	0	0	0	0	0	0	0	0	0	0	0	0	0	0
K01342_subtilisin	0	0	0	0	0	5.73e-07	0	0	0	0	0	0	0	0	0	0	0	0	0	0	0	0	0	1.96e-06	1.02e-06	0	0	0	3.31e-07	0	3.73e-07	3.02e-07	0	0	0	0	0	0	0	0	0	0	0	0	0	1.48e-06	3.99e-07	1.68e-06
K01343_tissue_plasminogen_activator	3.15e-06	2.27e-06	4.31e-06	7.19e-06	3.03e-06	2.93e-06	2.58e-06	2.88e-06	3.5e-06	2.19e-06	3.29e-06	2.3e-06	1.56e-06	3.86e-06	5.46e-06	5.01e-06	1.87e-06	1.65e-06	3.97e-06	3.58e-06	5.43e-06	2.47e-06	6.07e-06	3.86e-06	3.23e-06	2e-06	1.59e-06	2.11e-06	2.38e-06	2.3e-06	3.92e-06	3.46e-06	2.68e-06	2.08e-06	4.35e-06	2.86e-06	2.97e-06	3.55e-06	2.9e-06	2.5e-06	3.56e-06	2.05e-06	3.1e-06	4e-06	2.74e-06	2.6e-06	3.34e-06	2.18e-06
K01346_pancreatic_elastase_II	0	0	0	0	0	0	0	0	0	0	0	0	0	0	0	0	0	0	0	0	0	0	0	0	0	0	0	0	0	0	0	0	0	0	0	0	0	0	0	0	0	0	0	0	0	0	3.38e-06	0
K01349_furin	0	0	0	0	0	0	0	0	0	0	0	0	0	0	4.14e-06	0	0	0	0	0	0	0	0	0	0	0	0	0	0	0	0	0	0	0	0	0	2.19e-06	0	0	0	0	0	0	0	0	0	1.24e-06	0
K01350_myeloblastin	0	0	0	0	0	0	0	0	0	0	0	0	0	0	0	0	0	0	0	0	0	0	0	0	0	0	0	0	0	0	0	0	0	0	0	0	0	0	0	0	0	0	0	0	0	0	2.12e-06	0
K01354_oligopeptidase_B	0.000407536	0.00119761	0.000372483	8.19e-05	0.000328436	0.000410273	0.000171898	0.000777052	0.000584945	0.000762381	0.000336865	0.000693565	0.000296168	0.000106406	0.00014476	1.9e-05	5.89e-06	0.000618874	4.74e-05	0.0003765	0.000437334	0.000387825	0.000248211	8.9e-05	0.000605135	0.00067234	0.000375949	0.000337092	0.000601146	0.000526771	0.00024637	0.000691464	0.000440543	0.000700472	0.000568872	0.00011708	1.64e-05	0.000195948	2.66e-06	0.000482635	0.000119887	0.0003218	0.00100402	0.000213209	0.00048517	0.000901238	0.000191404	0.000643219
K01355_omptin	0	0	0	0	0	0	0	0	0	0	0	0	0	0	0	0	0	0	1.69e-05	0	1.47e-05	0	0	0	0	0	0	0	0	0	4.41e-06	5.97e-07	0	0	0	0	0	0	0	7.95e-06	0	0	0	0	0	0	0	0
K01356_repressor_LexA	0.000363121	0.000776094	0.000485757	0.000190535	0.000332661	0.000293209	0.000215556	0.000378861	0.000423162	0.000624236	0.000251459	0.000502281	0.000279666	0.000121013	0.000141169	0.00013334	0.000119827	0.000446943	0.000145098	0.000296217	0.000436741	0.000341713	0.000209026	0.000200942	0.00035667	0.000377136	0.000305742	0.000481909	0.00042451	0.000592375	0.000198767	0.000566848	0.000426643	0.000509842	0.000500971	0.000100162	0.000138868	0.000232596	0.000106549	0.000368286	0.000423126	0.000322233	0.00056858	0.000649783	0.000385197	0.000560407	0.0002679	0.000448362
K01357_wingless-type_MMTV_integration_site_family,_member_10	0	0	0	0	0	0	0	0	0	0	0	0	0	0	0	0	8.01e-06	0	0	0	0	0	0	5.66e-06	0	0	0	0	0	0	0	0	0	0	0	0	0	0	0	0	0	0	0	0	0	0	1.16e-06	0
K01358_ATP-dependent_Clp_protease,_protease_subunit	0.00322782	0.00327282	0.00346332	0.0032559	0.00299416	0.00312278	0.0029082	0.00301098	0.00311512	0.00305707	0.00281643	0.00335548	0.00237011	0.00444422	0.00286764	0.00291597	0.00311064	0.00307972	0.00300944	0.00279884	0.00326899	0.0035123	0.00338604	0.00357392	0.00332956	0.00317986	0.00259296	0.00329032	0.00283094	0.00287894	0.00336271	0.00321843	0.0031584	0.00289066	0.0034808	0.00301501	0.00307238	0.00400188	0.00222879	0.00380925	0.00356898	0.00383836	0.00331245	0.00300822	0.00291756	0.00322525	0.00331957	0.00319233
K01359_proprotein_convertase_subtilisin/kexin_type_1	0	0	0	0	0	0	0	0	0	0	0	0	0	0	4.46e-06	0	0	0	0	0	0	0	0	0	0	0	0	0	0	0	0	0	0	0	0	0	0	0	0	0	0	0	0	0	0	0	1.33e-06	0
K01361_lactocepin	6.79e-06	4.86e-07	7.91e-06	0	0	5.02e-07	0	0	0	2.09e-06	2.45e-06	0	0	0	0	0	1.15e-06	0	0	1.08e-06	0	1.61e-06	0	1.56e-06	0	7.5e-07	0	0	0	1.53e-06	9.99e-07	4.98e-07	0	4.43e-07	0	6.34e-07	5.37e-06	1.42e-06	0	1.61e-06	0	0	2.1e-06	0	0	0	3.13e-07	3.76e-06
K01362	0.000232721	0.000257651	0.000186356	0.000178281	0.00015706	0.000166814	8.48e-05	0.000149882	0.00010264	0.000156089	9.9e-05	0.000141549	0.000104738	5.31e-05	0.000177153	0.000194612	0.000130167	0.000170032	7.64e-05	0.000185209	0.000223669	0.000203307	0.000183022	0.000194095	0.000153776	0.000151636	0.000107395	8.07e-05	0.000123113	0.000206578	0.000102714	0.000136119	9.34e-05	0.000143034	0.000151765	5.16e-05	9.62e-05	0.000137109	1.77e-05	0.000158203	0.00012797	0.000111553	0.000185917	7.08e-05	0.000116788	0.000171711	9.92e-05	0.00021163
K01363_cathepsin_B	0	0	0	0	0	0	0	0	0	0	0	0	0	1.14e-05	0	0	6.03e-06	0	0	0	0	0	0	0	0	0	0	0	0	0	0	0	0	0	0	0	0	0	0	0	0	0	0	0	0	0	1.47e-06	0
K01364_streptopain	0	0	0	0	0	0	0	0	0	0	0	0	0	2.29e-05	0	0	0	0	0	0	0	0	0	0	0	0	0	0	0	0	0	0	0	0	0	0	0	0	0	0	0	0	0	0	0	0	0	0
K01365_cathepsin_L	0	0	0	0	0	0	0	0	0	0	0	0	0	0	0	0	0	0	0	0	0	0	2.99e-06	0	0	2.7e-06	0	0	0	0	0	0	0	0	0	0	0	0	0	0	0	0	0	0	0	0	0	0
K01367_calpain-1	0	0	0	0	0	0	0	0	0	0	0	0	0	0	0	0	0	0	0	0	0	0	0	0	0	0	0	0	0	0	0	0	0	0	0	0	0	0	0	0	5.57e-06	0	0	0	0	0	0	0
K01368_cathepsin_S	0	0	0	0	0	0	0	0	0	0	0	0	0	0	0	0	0	0	0	0	0	0	0	0	0	0	0	0	0	0	0	0	0	0	0	0	0	0	0	0	0	0	0	0	0	0	1.43e-06	0
K01369_legumain	0	0	0	0	0	0	0	0	0	0	0	0	0	0	0	0	0	0	0	0	0	0	0	0	0	0	0	0	0	0	0	0	0	0	0	2.18e-06	0	0	0	0	0	0	0	0	0	0	0	0
K01370_caspase_1,_apoptosis-related_cysteine_protease_(interleukin_1,_beta,	0	0	0	0	0	0	0	0	0	0	0	0	0	0	0	0	2.91e-06	0	0	0	0	0	0	0	0	0	0	0	0	0	0	0	0	0	0	0	0	0	0	0	0	0	0	0	0	0	1.94e-06	0
K01372_bleomycin_hydrolase	0.000921453	0.0020953	0.0008748	0.000287124	0.000922726	0.00111106	0.000591882	0.00152057	0.0014599	0.00143485	0.000872711	0.00148481	0.000929091	0.000444556	0.000546631	0.000200676	0.00027963	0.00117478	0.00030841	0.000999827	0.00109114	0.00112228	0.000652923	0.000457127	0.00127717	0.0013538	0.00101518	0.000864705	0.00134508	0.00134148	0.000659096	0.00145959	0.000945454	0.00147349	0.00124719	0.000654465	0.000323561	0.000583348	0.000308137	0.00104478	0.000387957	0.000760193	0.00153867	0.000550312	0.00106793	0.00198345	0.000553623	0.00125767
K01373_cathepsin_F	0	0	0	0	0	1.1e-06	0	0	0	0	0	0	0	0	0	0	0	0	0	0	0	0	0	0	0	0	0	0	0	0	0	0	0	0	0	0	0	0	0	0	0	0	0	0	0	0	0	0
K01374_cathepsin_O	0	0	0	0	0	0	0	0	0	0	0	0	0	0	0	0	1.46e-06	0	0	0	0	0	0	0	0	0	0	0	0	0	0	0	0	0	0	0	0	0	0	0	0	0	0	0	0	0	0	0
K01376	0	0	0	0	0	9.56e-07	0	0	0	0	0	0	0	0	0	0	0	0	0	0	0	0	2.98e-06	0	5.87e-07	6.64e-07	0	1.19e-05	1.58e-07	0	0	0	0	0	1.55e-07	0	0	0	0	0	0	0	0	6.06e-06	0	0	1.08e-06	0
K01384_wingless-type_MMTV_integration_site_family,_member_11	0	0	0	0	0	0	0	0	0	0	0	0	0	0	0	0	0	0	4.65e-06	0	0	0	0	0	0	0	0	0	0	0	0	0	0	0	0	0	0	0	0	0	0	0	0	0	0	0	0	0
K01387_microbial_collagenase	0	0	0	0	0	0	0	0	0	0	0	0	0	0	0	1.61e-06	0	0	7.24e-07	0	0	0	0	0	0	0	0	0	0	0	0	0	0	0	6.87e-08	0	0	0	0	2.28e-06	0	0	0	0	0	0	0	0
K01388_matrix_metalloproteinase-1_(interstitial_collagenase)	0	0	0	0	0	0	0	3.57e-06	0	0	0	0	0	0	0	0	3.51e-06	0	0	0	0	0	0	0	0	0	0	0	0	0	0	0	0	0	0	0	0	0	0	0	0	0	0	0	0	0	0	0
K01389_neprilysin	1.97e-06	5.75e-06	3.15e-06	2.04e-06	4.04e-06	3.65e-06	1.92e-06	5.51e-06	7.7e-06	4.96e-06	5.21e-06	2.85e-06	1.57e-06	2.92e-06	4.17e-07	1.03e-06	1.19e-06	3.62e-06	1.08e-06	3.13e-06	1.87e-06	3.93e-06	2.4e-06	1.24e-06	2.77e-06	2.89e-06	1.98e-06	2.81e-06	3.67e-06	4.4e-06	3.62e-06	3.61e-06	2.38e-06	3.26e-06	4.34e-06	3.83e-06	1.62e-06	1.48e-07	1.03e-06	4.27e-06	2.11e-06	3.15e-06	7.83e-06	2.63e-06	3.09e-06	5.63e-06	1.47e-06	6.17e-06
K01392_thimet_oligopeptidase	0	0	2.19e-06	0	0	0	0	0	0	0	0	0	0	0	0	5.86e-06	0	0	0	3.15e-06	0	0	3.02e-06	0	0	0	0	0	0	0	8.3e-07	1.68e-06	4.04e-06	0	0	6.53e-08	0	1.35e-07	0	0	0	0	0	0	0	0	0	0
K01393_neurolysin	0	0	0	0	0	9.65e-07	0	0	0	0	0	0	0	0	0	0	0	0	0	0	0	0	0	0	0	0	0	0	0	0	0	0	0	0	0	0	0	0	0	0	0	0	0	0	0	0	0	0
K01395_meprin_A,_alpha	0	0	0	2.9e-06	0	0	0	0	0	0	0	0	0	0	0	0	0	0	2.06e-06	0	0	0	0	0	0	0	0	0	0	0	0	0	0	0	0	0	0	0	0	0	0	0	0	0	0	0	5.78e-07	0
K01398_matrix_metalloproteinase-2_(gelatinase_A)	0	0	0	0	0	0	0	0	0	0	0	0	0	0	0	0	0	0	0	0	0	0	0	0	0	0	0	0	0	0	0	2.86e-07	0	0	0	0	0	0	0	0	0	0	0	0	0	0	0	0
K01402_matrix_metalloproteinase-8_(neutrophil_collagenase)	0	0	0	0	0	0	0	0	0	0	0	0	0	0	0	0	0	0	0	0	0	0	0	0	0	0	0	0	0	0	0	0	0	0	0	0	0	0	0	0	0	0	0	0	0	0	1.06e-06	0
K01403_matrix_metalloproteinase-9_(gelatinase_B)	0	0	0	0	0	0	0	0	0	0	0	0	0	0	0	0	0	0	0	0	0	0	3.05e-06	0	0	0	0	0	0	0	0	0	0	0	0	0	0	0	0	0	0	0	0	0	0	0	0	0
K01407_protease_III	2.22e-06	0	0	0	4.78e-06	0	0	0	0	1.85e-06	0	4.43e-06	0	0	0	0	1.71e-06	0	1.11e-05	0	0	0	2.18e-06	0	0	0	0	0	0	0	5.25e-06	2.56e-06	9.47e-07	0	7.04e-07	9.45e-07	0	0	0	7.86e-06	0	2.3e-06	0	0	0	0	0	0
K01408_insulysin	0	0	3.46e-06	0	0	0	0	0	0	0	0	0	0	0	0	0	0	0	0	0	0	0	0	0	0	0	0	0	0	0	2.62e-06	0	0	0	0	0	3.95e-06	0	0	0	0	0	0	0	0	0	5.34e-07	0
K01409_O-sialoglycoprotein_endopeptidase	0.00108475	0.00119358	0.00104895	0.00116521	0.00106075	0.00124738	0.00121256	0.00129861	0.000998337	0.00132055	0.000992378	0.00112834	0.00147942	0.00101221	0.00119345	0.00115584	0.00119847	0.000876685	0.00116371	0.00099205	0.0014666	0.000850741	0.00106982	0.00129338	0.00102418	0.00119349	0.00137426	0.001066	0.00131691	0.00115623	0.00097328	0.00129683	0.00126122	0.00119369	0.00108343	0.00107692	0.00102227	0.00107701	0.00126336	0.000885003	0.00109919	0.000984979	0.00101967	0.00113774	0.00141306	0.00112671	0.001091	0.00114674
K01410_mitochondrial_intermediate_peptidase	0	0	0	0	0	0	0	2.34e-06	0	0	0	0	0	0	4.72e-06	0	0	0	0	0	0	0	0	0	0	0	0	0	0	0	0	0	0	0	0	0	0	0	0	0	0	0	0	0	0	0	7.02e-07	0
K01411_nardilysin	0	0	0	0	0	0	0	0	0	0	0	0	0	0	0	0	0	0	0	0	0	0	0	2e-06	0	0	0	0	0	0	0	0	0	0	0	0	0	0	0	0	0	0	0	0	0	0	0	0
K01412_mitochondrial_processing_peptidase	0	1.83e-06	0	9.91e-06	0	0	4.3e-06	2.94e-06	0	0	0	0	0	6.42e-06	6.64e-06	0	0	4.28e-06	2.33e-05	0	9.31e-06	0	0	0	0	2.15e-06	0	0	7.42e-07	0	8.45e-06	1.9e-06	0	0	4.04e-07	1.82e-06	3.39e-06	5.93e-07	0	5.06e-06	0	8.88e-06	0	0	0	0	2.23e-06	5.02e-06
K01414_oligopeptidase_A	4.25e-05	1.1e-05	4.72e-05	2.82e-05	4.43e-05	1.7e-05	2.82e-05	1.55e-05	2.09e-05	2.28e-05	2.93e-05	2.06e-05	5.72e-06	4.2e-05	2.97e-05	1.96e-05	2.85e-05	0.000134461	3.17e-05	5.74e-05	1.68e-05	3.81e-05	2.68e-05	2.65e-05	1.13e-05	1.85e-05	1.89e-05	0	2.37e-05	4.58e-05	3.85e-05	1.38e-05	1.77e-05	8.95e-06	2.18e-05	3.83e-05	7.21e-05	2.2e-05	2.2e-06	3.14e-05	3.23e-05	4.51e-05	4.84e-06	5.37e-05	4.68e-06	2e-05	4.24e-05	2.5e-05
K01415_endothelin-converting_enzyme	1.92e-05	1.71e-05	3.5e-05	2.51e-05	3.58e-05	3.71e-05	3.45e-05	3.36e-05	3.96e-05	3.13e-05	3.53e-05	2.35e-05	2.28e-05	4.79e-05	1.92e-05	3.57e-05	2.73e-05	3.41e-05	2.83e-05	2.69e-05	2.59e-05	4.11e-05	2.26e-05	2.87e-05	2.73e-05	1.95e-05	2.53e-05	1.97e-05	3.02e-05	2.21e-05	3.38e-05	2.17e-05	2.73e-05	2.68e-05	3.32e-05	4.8e-05	4.83e-05	3.69e-05	2.56e-05	3.39e-05	1.03e-05	2.92e-05	2.79e-05	2.3e-05	3.23e-05	2.03e-05	2.74e-05	3.07e-05
K01417	4.93e-05	2e-05	2.37e-05	2.89e-05	6.64e-05	1.38e-05	4.33e-05	4.9e-05	4.74e-05	2.46e-05	1.17e-05	3.27e-05	3.01e-05	2.84e-05	1.12e-05	3.56e-05	7.43e-05	2.5e-05	2.58e-05	3.2e-05	3.06e-05	6.31e-05	7.55e-06	5.24e-05	3.24e-05	3.01e-05	1.88e-05	6.63e-05	2.32e-05	3.51e-05	4.38e-05	2.05e-05	2.68e-05	1.29e-05	4.81e-05	4.82e-05	6.84e-05	7.3e-05	1.24e-05	2.94e-05	6.56e-05	1.49e-05	1.93e-05	2.29e-05	2.73e-05	2.73e-05	2.51e-05	3.77e-05
K01419_ATP-dependent_HslUV_protease,_peptidase_subunit_HslV	1.17e-05	1.65e-05	7.13e-05	6.15e-05	0.000114634	3.1e-05	1.18e-05	1.79e-05	4.59e-05	7.07e-05	0	2.28e-05	5.46e-05	3.29e-05	5.47e-05	4.35e-05	2.7e-05	6.41e-05	4.96e-05	3.52e-05	0.000111344	5.6e-05	4.76e-05	3.87e-05	2.79e-05	5.59e-05	1.96e-05	0	9.13e-06	9.98e-05	4.91e-05	3.06e-05	3.51e-05	2.67e-05	8.22e-05	3.99e-05	6.57e-05	6.64e-05	1.22e-05	1.39e-05	2.2e-05	1.15e-05	1.65e-05	3.82e-05	1.86e-05	6.81e-06	4.72e-05	3.51e-05
K01420_CRP/FNR_family_transcriptional_regulator,_anaerobic_regulatory	0	6.94e-06	2.38e-05	0	2.91e-05	2.73e-06	8.26e-06	0	0	0	0	0	4.54e-06	0	1.48e-05	1.74e-05	6.11e-06	2.5e-05	6.35e-06	8.26e-06	0	3.23e-05	0	0	5.05e-06	1.37e-05	2.75e-06	4.44e-05	0	1.16e-05	1.61e-05	9.06e-06	7.43e-06	2.81e-06	5.41e-06	0	1.39e-05	1.62e-05	0	2.75e-05	0	8.32e-06	0	2.89e-05	4.73e-06	0	3.84e-06	8.44e-06
K01421_putative_membrane_protein	0.000308653	0.000751928	0.000280043	7.63e-05	0.000317771	0.000428972	0.000193701	0.000607609	0.000640517	0.000603952	0.000350733	0.000558649	0.000269983	6.32e-05	0.000125457	6.16e-05	9.19e-06	0.000476218	7.33e-05	0.000396695	0.000542409	0.000285019	0.000190322	8.72e-05	0.000599753	0.000538577	0.000233719	0.000437628	0.000566758	0.000509492	0.000249788	0.000643106	0.000317864	0.00061962	0.000491733	0.000129802	3.63e-05	0.000207465	0.00011144	0.000420786	0.000146429	0.000286309	0.00060372	0.000267147	0.000480822	0.000780941	0.000179424	0.000452312
K01422	0	0	7.14e-06	0	0	0	0	0	0	0	0	0	0	5.25e-06	8.11e-06	9.54e-06	3.83e-06	4.74e-06	0	0	0	0	0	5.91e-06	3.09e-06	2.73e-06	0	0	5.21e-06	0	6.76e-07	8.08e-07	2.19e-06	0	5.22e-06	4.41e-06	0	2.7e-06	5.36e-06	0	0	0	0	0	2.73e-06	0	3.61e-06	5.1e-06
K01423	0	4.51e-07	7.06e-06	0	1.11e-05	3.4e-06	0	1.96e-05	1.47e-05	4.31e-06	2.81e-05	5.12e-06	1.32e-05	9.3e-06	7.69e-06	0	2.12e-05	9.28e-06	2.07e-05	1.01e-05	2.53e-05	6.01e-06	0	1.02e-05	3.03e-06	1.27e-05	3.36e-06	6.37e-05	4.11e-06	0	2.74e-05	6.41e-06	8.69e-06	3.25e-06	4.23e-05	6.28e-06	7.98e-06	6.76e-07	5.25e-06	1.41e-05	5.4e-06	1.04e-05	2.07e-05	0	2.47e-05	2.92e-06	8.28e-06	1.02e-05
K01424_L-asparaginase	0.000527081	0.000883979	0.000411022	0.00022235	0.000522244	0.000451743	0.000582937	0.00056196	0.000560746	0.00054315	0.000540657	0.000665856	0.000395566	0.000512402	0.000437343	0.000152338	0.000209763	0.000526614	0.000247342	0.000485689	0.000534486	0.000569682	0.000421843	0.00033611	0.000463058	0.000613529	0.000473227	0.000441972	0.000490337	0.000473512	0.000541343	0.000489039	0.000359714	0.000507052	0.000512098	0.000308984	0.000251591	0.000326647	0.00013872	0.000639942	0.000217887	0.000404116	0.000796345	0.000240566	0.000430785	0.000575954	0.000389346	0.000536591
K01425_glutaminase	7.02e-06	2.79e-06	1.91e-05	0	2.92e-05	1.85e-05	0	1.61e-05	1.35e-05	1.2e-05	1.12e-05	1.35e-05	7.02e-06	2.97e-05	0	1.23e-05	0	6.28e-06	0	0	1.48e-05	8.25e-06	2.81e-05	0	0	0	1.13e-05	1.66e-05	1.32e-05	0	1.08e-05	7.28e-06	8.96e-06	1.12e-05	5.47e-06	3.53e-05	1.64e-05	1.99e-05	0	8.02e-06	0	2.83e-05	0	7.38e-06	0	1.22e-05	1.3e-05	0
K01426_amidase	0	3.6e-05	3.92e-05	6.38e-05	0	2.63e-05	1.07e-05	5.78e-05	0	6.13e-06	2.02e-05	6.14e-06	3.69e-06	8.86e-06	1.94e-05	2.02e-05	2.5e-05	4.07e-05	1.04e-05	1.04e-05	0	1.19e-05	1.41e-05	2.16e-05	8.08e-06	1.52e-05	5.55e-06	5.39e-05	1.44e-05	0	1.2e-05	1.24e-05	1.28e-05	1.8e-05	4.84e-06	1.01e-05	0	1.37e-05	4.74e-06	5.18e-06	4.53e-08	6.49e-06	8.66e-06	0	1.13e-05	0	8.68e-06	1.45e-05
K01427_urease	1.12e-05	6.33e-06	4.93e-06	4.34e-06	6.8e-06	5.88e-06	2.23e-06	1.33e-05	1.11e-05	1.08e-05	1.43e-06	9.22e-06	1.89e-06	6.92e-07	2.09e-06	1.27e-05	5.9e-07	3.66e-06	1.34e-06	4.53e-06	9.26e-06	4.32e-06	6.7e-06	3.47e-06	8.64e-06	7.51e-06	3.36e-06	6.24e-06	6.33e-06	4.94e-06	4.87e-06	9.37e-06	4.95e-06	8.38e-06	6.43e-06	2.71e-06	1.08e-05	6.33e-06	9.81e-06	3.82e-06	8.36e-06	3.32e-06	7.49e-06	5.45e-06	8.35e-06	6.83e-06	6.4e-06	1.43e-06
K01428_urease_alpha_subunit	0.000285594	0.0005819	0.000354792	0.000120637	0.000468565	0.000500844	0.000239954	0.000850384	0.000766642	0.000657885	0.000425961	0.000678292	0.000282936	0.000105158	0.000173403	0.000196785	4.23e-05	0.000348272	9.79e-05	0.000350605	0.00057752	0.000328963	0.000279344	9.37e-05	0.00067224	0.000585164	0.000272414	0.000399654	0.000675102	0.000624722	0.000342548	0.000848788	0.000445847	0.000858901	0.000580641	9.61e-05	0.000185034	0.000264573	0.000175944	0.000364479	0.000252338	0.000308034	0.00073875	0.000242793	0.000470241	0.000964	0.000262501	0.000266829
K01429_urease_beta_subunit	1.79e-05	1.64e-05	1.21e-05	3.73e-05	2.28e-05	1.03e-05	0	7.51e-06	9.62e-06	1.24e-05	0	1.5e-05	0	0	0	1.27e-05	0	7.79e-05	0	5.18e-05	5.25e-06	2.5e-05	0	2.5e-05	9.64e-06	8.71e-06	0	0	6.4e-06	2.99e-05	1.16e-05	1.79e-05	4.1e-06	0	2.91e-06	1.24e-05	1.67e-05	0	2.32e-05	0	3.95e-05	2.19e-05	0	7.75e-06	3.83e-06	6.7e-06	2.32e-05	2.25e-05
K01430_urease_gamma_subunit	2.14e-05	0	0	0	0	6.93e-06	0	1.67e-05	4.27e-05	1.78e-05	0	0	0	0	0	3.94e-05	0	1.97e-05	0	0	0	0	0	0	2.56e-05	0	1.41e-05	0	8.3e-06	0	1.11e-05	1.89e-06	0	6.94e-06	8.05e-06	0	3.38e-05	0	0	2.52e-05	3.99e-05	2.21e-05	3e-05	0	0	1.24e-05	0	0
K01431_beta-ureidopropionase	0	7.7e-07	0	0	0	0	0	0	0	0	0	0	0	0	0	0	0	0	0	0	0	0	0	0	0	0	0	0	1.5e-07	0	8.46e-07	1.1e-06	0	0	3.98e-07	0	0	0	0	7.03e-07	0	0	0	0	0	0	1.13e-07	0
K01433_formyltetrahydrofolate_deformylase	0.000111473	1.17e-05	0.000108688	0.0007905	0.000247137	0.000392922	4.34e-05	0.000122067	6.58e-05	3.09e-05	0	1.48e-05	3.85e-06	7.38e-05	5.89e-05	5.58e-05	5.74e-06	0.000155771	1.86e-05	7.34e-05	0.00011737	0.000131408	0.000268407	0.000102409	0.000154301	8.1e-06	9.78e-06	0	5.65e-05	4.26e-05	0.000104433	4.99e-05	4.19e-05	1.95e-05	0.000128696	0.00011091	0.000186709	4.22e-05	0	7.06e-05	0.000140976	0.000115465	3.18e-05	4.76e-05	6.7e-05	4.32e-05	8.35e-05	8.1e-05
K01434_penicillin_amidase	0	0	1.79e-06	0	0	0	0	0	0	0	0	2.52e-06	0	0	0	0	1.95e-06	0	0	0	0	0	0	0	0	0	0	0	1.49e-06	0	3.99e-06	1.15e-06	0	0	8.26e-07	0	0	2.4e-06	0	1.19e-05	4.58e-06	0	0	0	0	0	5.75e-07	1.54e-06
K01435_biotinidase	0	0	0	0	0	0	0	2.97e-06	0	0	0	0	0	0	0	0	0	0	0	0	0	0	0	0	2.35e-06	0	0	0	0	0	0	0	0	0	0	0	0	0	0	0	0	0	0	0	0	0	0	0
K01436_aminoacylase	0.000284799	0.00100904	0.000327074	7.72e-05	0.000252869	0.000400366	0.000149314	0.000579632	0.000564258	0.000582652	0.000311371	0.000440307	0.000292111	6.36e-05	0.000140298	2.79e-05	2.89e-05	0.000392831	4.1e-05	0.000273212	0.000454232	0.000377809	0.000184577	0.000119037	0.000460577	0.000588042	0.000326932	0.00031738	0.000496197	0.000544543	0.00020943	0.000611398	0.00033335	0.000542399	0.000462159	5.31e-05	3.86e-05	0.000124214	0	0.000332027	7.31e-05	0.000328933	0.000762447	0.000149154	0.000324608	0.000721391	0.000145417	0.000358041
K01437_aspartoacylase	0	0	0	0	0	2.25e-06	0	0	0	0	0	0	0	0	0	0	0	0	0	0	0	0	0	0	0	0	0	0	0	0	0	0	0	0	0	0	0	0	0	0	0	0	0	0	0	0	1.57e-06	0
K01438_acetylornithine_deacetylase	0.000113237	2.13e-05	6.21e-05	2.58e-05	6.43e-05	5.43e-05	4.23e-05	3.77e-05	6.64e-05	3.1e-05	8.3e-06	4.79e-05	0.000125201	3.44e-05	7.46e-05	2.24e-05	9.24e-05	3.84e-05	0.000114655	6.5e-05	4.52e-05	4.99e-05	4.74e-05	0.000114487	2.9e-05	6.99e-05	9.87e-05	7.31e-05	9.47e-05	8.23e-05	6.83e-05	5.87e-05	0.000143212	6.59e-05	4.75e-05	0.000104931	7.3e-05	9.52e-05	6.91e-05	3.56e-05	3.3e-05	3.03e-05	2.41e-05	5.15e-05	8.12e-05	4.55e-05	6.9e-05	4.18e-05
K01439_succinyl-diaminopimelate_desuccinylase	0.000439818	0.0010032	0.000389072	8.13e-05	0.000348514	0.000465926	0.000237756	0.000751733	0.000587549	0.000730448	0.000376805	0.000658541	0.000297777	0.000103385	0.000164647	2.79e-05	5.3e-05	0.00068351	7.23e-05	0.000554433	0.000579118	0.000429817	0.000282604	7.64e-05	0.000595685	0.000617422	0.000443744	0.000345056	0.000610058	0.0005496	0.000265616	0.000736922	0.000403931	0.000610851	0.000576526	0.000120299	5.45e-05	0.000260728	3.86e-05	0.0003902	0.00013453	0.000310223	0.000929021	0.000248106	0.000542856	0.000969942	0.000178023	0.000566978
K01441_alkaline_ceramidase	0	0	0	0	0	0	0	0	0	0	0	0	0	0	0	0	2.16e-06	0	0	0	0	0	0	0	0	0	0	0	0	0	0	0	0	0	0	0	0	0	0	0	0	0	0	0	0	0	0	0
K01442_choloylglycine_hydrolase	0.000302306	0.000807171	0.000474609	0.000129004	0.000473323	0.000353391	0.000287	0.000513407	0.000548091	0.000573827	0.000425402	0.000350496	0.000342673	0.000281297	0.000197052	0.000154171	8.36e-05	0.000347386	0.000205351	0.000420566	0.000362294	0.000344786	0.000273648	0.000224688	0.000495334	0.000434847	0.000361799	0.000291307	0.000450867	0.000484973	0.00028536	0.000613172	0.000419056	0.000676302	0.000551202	0.000174393	0.000212123	0.000290752	0.00026883	0.000424381	0.000292271	0.000426674	0.000680126	0.00055505	0.00034256	0.000728683	0.000282452	0.000455135
K01443_N-acetylglucosamine-6-phosphate_deacetylase	7.55e-05	6.07e-05	8.2e-05	2.1e-05	8.87e-05	6.31e-05	9.73e-05	7.02e-05	7.38e-05	5.2e-05	0.000159535	4.46e-05	4.71e-05	0.000168635	8.89e-05	3.3e-05	6.31e-05	0.00015954	4.42e-05	8.22e-05	5.64e-05	5.5e-05	6.98e-05	7.4e-05	3.13e-05	5.85e-05	6.13e-05	8.1e-05	5.12e-05	6.05e-05	9.07e-05	3.8e-05	4.31e-05	2.35e-05	8.14e-05	9.78e-05	5.05e-05	6.75e-05	3.6e-05	0.000105713	6.74e-05	0.000116442	5.78e-05	7.91e-05	5.5e-05	3.25e-05	5.85e-05	2.89e-05
K01444_N4-(beta-N-acetylglucosaminyl)-L-asparaginase	0	0	4.64e-06	0	0	0	0	0	0	0	0	6.67e-06	0	0	0	0	0	0	0	0	0	7.92e-06	0	0	0	0	0	0	2.5e-06	0	8.02e-07	5.93e-07	2.85e-06	0	0	0	0	6.38e-06	0	0	0	0	0	0	0	0	0	0
K01446_N-acetylmuramoyl-L-alanine_amidase	0	9.04e-07	0	0	0	0	0	0	0	0	0	0	0	0	0	0	0	0	0	5.66e-06	0	0	0	0	0	2.41e-06	0	0	0	0	0	1.31e-06	0	0	0	0	0	0	0	0	0	0	0	0	0	0	2.55e-06	0
K01447_N-acetylmuramoyl-L-alanine_amidase	5.11e-05	4.93e-06	3.53e-05	3.69e-05	4.94e-05	1.55e-05	0	2.15e-05	5.5e-05	5.47e-06	0	1.84e-05	0	5.81e-05	1.11e-05	4.24e-05	1.75e-05	2.64e-05	2.32e-05	4.56e-05	0.000338108	3.29e-05	0	5.3e-05	9.04e-06	4.82e-06	0	0	1.45e-05	0	1.44e-05	8.71e-06	1.2e-05	0	1.06e-05	2.53e-05	2.17e-05	0	1.93e-05	2.16e-05	1.73e-05	8.97e-05	9.56e-06	1.97e-05	4.06e-05	0	4.36e-05	1.81e-05
K01448_N-acetylmuramoyl-L-alanine_amidase	4.88e-05	3.23e-05	5.95e-05	5.42e-06	5.36e-05	3.07e-05	1.92e-05	5.2e-05	2.86e-05	5.61e-05	9.84e-06	4.59e-05	0.000119302	0	3.99e-05	0.000100136	7.44e-05	1.39e-05	8.01e-05	5.69e-05	8.86e-05	2.38e-05	7.36e-05	0	5.48e-05	4.87e-05	8.69e-05	5.08e-05	7.39e-05	6.21e-05	5.32e-05	5.71e-05	0.000102125	3.31e-05	4.18e-05	4.58e-05	5.6e-05	7.83e-05	0.0002021	4.5e-05	6.14e-05	9.47e-05	6.78e-06	0.000166758	9.28e-05	5.1e-05	4.9e-05	5.12e-05
K01449_N-acetylmuramoyl-L-alanine_amidase	6.31e-05	2.75e-05	6.17e-05	6.92e-05	3.88e-05	3.57e-05	3.66e-05	2.8e-05	9.08e-05	3.75e-05	5.66e-05	9.01e-06	1.56e-05	3.84e-05	3.99e-05	0.000276901	6.84e-05	4.95e-05	8.21e-05	7.3e-05	5.56e-05	0.000104528	0.000149395	8.45e-05	5.72e-05	1.42e-05	1.77e-05	8.92e-05	1.37e-05	0.000166434	4.89e-05	2.24e-05	7.44e-05	2.99e-05	8.63e-05	4.07e-05	2.86e-05	0.0001155	1.93e-05	4.19e-05	0.000119985	8.7e-05	4.17e-05	5.76e-05	5.49e-05	4.67e-05	7.8e-05	5.4e-05
K01451_hippurate_hydrolase	5.32e-06	1.35e-05	2.24e-05	0	1.1e-05	3.73e-06	1.85e-06	1.25e-05	1.65e-05	7.64e-07	0	5.63e-06	5.81e-06	1.42e-05	8.7e-06	1.38e-06	1.26e-05	0	1.78e-05	1.05e-05	2.96e-06	1.03e-05	5.37e-06	5.12e-07	3.39e-06	2.03e-05	7.34e-06	7.85e-06	3.17e-06	0	9.92e-06	1.42e-05	1.66e-05	1.29e-06	6.77e-06	1.26e-05	6.5e-06	1.74e-06	0	1.71e-05	1.02e-05	5.85e-06	7.49e-06	5.73e-06	8.78e-06	6.56e-06	6.39e-06	1.07e-05
K01452_chitin_deacetylase	0	0	0	0	0	0	0	0	0	0	0	0	0	0	0	0	0	0	0	7.92e-06	0	0	0	0	0	0	0	0	0	0	0	1.12e-06	0	0	0	0	0	0	0	0	0	0	0	0	0	0	0	0
K01453	4.77e-06	5.6e-06	1.31e-05	3.07e-05	3.09e-05	1.33e-05	0	0	0	0	0	0	0	2.7e-05	3.73e-05	3.55e-05	3.37e-05	3.1e-05	2.42e-05	1.91e-05	2.06e-05	1.67e-05	3.9e-05	4.4e-05	0	0	0	0	0	1.35e-05	1.52e-05	0	0	0	0	0	1.9e-05	2.33e-05	0	1.7e-05	8.86e-06	9.97e-06	6.79e-06	5.03e-06	0	2.81e-06	6.69e-06	4.71e-06
K01455_formamidase	0.00028333	5e-05	3.04e-05	0.000167233	9.55e-05	9.41e-05	8.32e-05	0.000153408	3.16e-05	5.42e-05	8.24e-05	7.58e-05	3.29e-06	7.07e-05	4.99e-05	0.000221551	9.61e-05	0.00016339	0.000100957	6.17e-05	6.18e-05	6.57e-05	8.98e-05	0.000145254	0.000169522	2.35e-05	6.29e-05	4.38e-05	6.17e-05	3.58e-05	9.73e-05	3.88e-05	4.32e-05	6.57e-05	7.2e-05	0.000112137	0.000150082	0.0004175	9.93e-05	4.49e-05	0.000152093	9.2e-05	7.15e-05	7.28e-05	7.06e-05	3.33e-05	0.000178856	0.000162781
K01456_peptide-N4-(N-acetyl-beta-glucosaminyl)asparagine_amidase	0	0	0	0	0	0	0	0	0	0	0	0	0	0	0	0	0	0	0	0	0	0	0	0	1.54e-06	0	0	0	0	0	0	0	0	0	0	0	0	0	0	0	0	0	0	0	0	0	0	0
K01457_allophanate_hydrolase	3.72e-06	7.99e-07	8.15e-06	8.89e-08	9.06e-06	6.06e-08	4.16e-06	5.63e-06	1.21e-05	8.97e-08	6.15e-06	3.63e-06	4.12e-06	5.41e-06	0	1.34e-05	2.8e-06	0	0	8.37e-08	1.56e-05	5.46e-08	1.11e-07	1.3e-05	4.83e-08	0	2.65e-06	0	3.69e-06	2.55e-05	2.07e-06	3.02e-06	5.6e-08	9.67e-06	1.19e-06	1.55e-06	3.28e-08	3.45e-06	1.15e-05	4.95e-08	0	1.9e-05	5.33e-06	2.06e-05	1.93e-06	0	1.33e-05	3.73e-06
K01458_N-formylglutamate_deformylase	8.24e-06	0	0	0	0	0	0	0	0	0	0	0	0	0	0	0	0	0	0	0	0	0	0	0	0	0	0	0	0	0	0	6.98e-07	0	0	0	0	0	0	0	0	0	0	0	0	0	0	0	0
K01459	0	0	5.07e-06	0	7.88e-06	7.38e-06	7.34e-06	5.71e-06	7.31e-06	0	1.2e-05	7.29e-06	3.76e-06	0	0	1.36e-05	5.64e-06	0	0	0	0	0	0	7.71e-06	4.39e-06	3.88e-06	0	0	1.42e-06	1.03e-05	9.61e-07	1.3e-06	0	2.39e-06	5.8e-06	3.11e-06	0	0	0	0	0	0	1.03e-05	0	0	4.24e-06	1.71e-05	0
K01460_glutathionylspermidine_amidase	3.4e-06	2.02e-06	9.44e-06	0	2.57e-05	2.3e-06	3.4e-06	2.64e-06	0	0	0	0	0	0	0	0	2.62e-06	1.87e-05	1.14e-05	0	0	0	0	0	2.05e-06	0	3.35e-06	0	0	9.57e-06	1.21e-05	1.21e-06	0	0	1.08e-06	0	1.88e-05	0	0	1.21e-05	2.53e-05	1.05e-05	0	1.81e-05	0	3.93e-06	2.38e-06	3.34e-06
K01461	0	0	0	0	0	0	0	0	0	0	0	0	0	0	0	0	0	0	0	0	0	0	0	0	0	0	0	0	0	0	0	0	0	0	0	0	0	0	0	5.08e-06	0	0	0	0	0	0	0	1.44e-06
K01462	0.000731956	0.00192187	0.000973856	0.00048224	0.000931903	0.000965	0.000535085	0.0014464	0.00119867	0.00117645	0.000911833	0.00124555	0.000882813	0.000431286	0.000603447	0.000272539	0.000309486	0.00103109	0.000319096	0.000902487	0.00105457	0.00101754	0.000499786	0.000372284	0.00114286	0.00107599	0.000982649	0.0007344	0.00117909	0.00117474	0.000489911	0.00143156	0.00114576	0.0013761	0.00122478	0.000409416	0.000165484	0.000457266	0.000380118	0.000930161	0.000435061	0.000663135	0.00135998	0.000808657	0.000978812	0.00153076	0.000421664	0.00110271
K01463	0	1.05e-06	0	0	1.34e-05	4.4e-06	0	0	0	0	0	0	0	0	0	0	8.12e-06	1.88e-05	6.59e-06	2.62e-06	1.05e-05	2.17e-05	0	3.46e-05	0	4.03e-06	5.06e-06	5.33e-06	0	2.15e-05	4.04e-06	4.8e-07	0	0	8.66e-07	0	2.77e-06	0	0	9.17e-06	1.3e-05	0	0	0	0	0	0	7.51e-06
K01464_dihydropyrimidinase	0.000119967	9.24e-05	8.76e-05	6.38e-05	7.05e-05	5.85e-05	5.78e-05	4.85e-05	6.6e-05	8.25e-05	7.68e-05	0.000144894	0.000111977	2.37e-05	4.44e-05	0.000153091	4.34e-05	8.1e-05	0.000200298	4.94e-05	6.94e-05	0.0001766	0.000108901	5.39e-05	8.14e-05	6.14e-05	5.26e-05	0.0001225	3.28e-05	8.61e-05	6.82e-05	0.000104012	0.000103553	6.08e-05	8.01e-05	9.4e-05	0.00013453	0.000154324	7.62e-05	0.000105684	0.000120301	0.000121645	5.22e-05	0.000136884	5.93e-05	6.18e-05	0.000108557	0.000127886
K01465_dihydroorotase	0.000361452	0.000918227	0.000339919	0.000144521	0.000337997	0.000394853	0.000251864	0.000591193	0.000604194	0.000532431	0.000306861	0.000645867	0.000425001	0.000109063	0.000230903	0.00016573	0.000150122	0.000432573	0.000175425	0.000359967	0.000451715	0.000313509	0.000315425	0.000183773	0.000537006	0.000560838	0.000418342	0.000377898	0.000533782	0.00050552	0.000227301	0.000673801	0.000450841	0.000574468	0.000570594	0.000174796	0.000151692	0.000316173	0.000273481	0.000385275	0.000179482	0.000301833	0.000718094	0.000333117	0.000456657	0.000787561	0.000248751	0.000546951
K01466_allantoinase	9.15e-06	2.61e-05	1.93e-05	0	5.1e-06	2.05e-05	4.55e-06	2.92e-05	2.81e-05	1.98e-05	1.48e-05	4.2e-05	2.42e-06	0	2.21e-05	0	7.14e-06	2.12e-05	7.73e-06	9.24e-06	3.02e-05	1.11e-05	0	0	1.94e-05	1.48e-05	1.23e-05	4.49e-05	9.81e-06	3.95e-05	1.45e-05	2.72e-05	1.59e-05	2.6e-05	2.97e-05	0	0	1.34e-05	1.48e-05	3.78e-05	0	9.68e-06	3.25e-05	4.9e-06	2.72e-05	1.87e-05	1.19e-05	9.24e-06
K01467_beta-lactamase	1.5e-05	0	3.46e-06	9.17e-06	0	0	0	0	0	0	0	0	0	0	0	0	5.15e-06	4.68e-06	8.49e-06	0	5.52e-06	0	0	9.01e-06	3.03e-06	0	0	0	0	0	4.65e-06	2.36e-06	0	0	0	2.16e-06	1.19e-05	0	0	1.22e-05	0	0	0	0	0	0	0	4.93e-06
K01468_imidazolonepropionase	1.03e-05	2.04e-06	1.44e-05	5.46e-06	2.76e-05	1.72e-06	5.14e-06	2.02e-05	1.55e-05	7.82e-06	8.4e-06	5.15e-06	1.85e-05	2.19e-05	1.61e-05	9.33e-06	0	0	4.29e-06	5.16e-06	5.55e-06	6.14e-06	2.08e-05	1.77e-05	9.24e-06	1.64e-05	2.04e-05	2.52e-05	1e-05	7.82e-06	1.56e-05	1.23e-05	2.18e-06	6.72e-06	4.93e-06	1.33e-05	1.62e-05	2.45e-05	5.32e-06	0	1.91e-05	1.07e-05	7.31e-06	0	5.41e-06	1.49e-05	7.09e-06	1.01e-05
K01469_5-oxoprolinase_(ATP-hydrolysing)	0	3.49e-07	0	0	0	0	0	1.23e-06	0	0	0	0	0	0	2.53e-06	0	0	0	0	0	0	2.09e-06	0	0	0	0	0	0	1.72e-06	0	2.3e-07	1.24e-06	0	0	5.97e-07	1.42e-06	1.34e-06	0	0	0	0	0	0	0	0	0	7.69e-07	1.74e-06
K01470_creatinine_amidohydrolase	3.39e-05	0.000112228	4.12e-05	0	2.53e-05	6.02e-05	0	1.32e-05	1.69e-05	0.000108848	4.17e-05	5.92e-05	3.9e-05	1.87e-05	2.37e-05	1.65e-05	1.24e-05	0.000169932	1.42e-05	5.96e-05	6.44e-05	4.01e-05	0	1.95e-05	3.02e-05	5.74e-05	5.59e-06	2.06e-05	3.09e-05	2.39e-05	1.11e-05	6.08e-05	5.42e-05	9.69e-05	0.0001053	3.28e-05	1.34e-05	2.06e-05	1.57e-05	2e-05	6.33e-05	5.07e-05	9.26e-05	5.43e-05	0.000106382	5.68e-05	2.78e-05	0.00015913
K01471	0	0	0	0	0	0	0	0	0	0	0	0	0	0	0	0	0	0	0	0	0	0	0	0	0	0	0	0	0	0	0	1.95e-07	0	0	0	0	0	0	0	0	0	0	0	0	0	0	0	0
K01473_N-methylhydantoinase_A	3.24e-06	6.25e-07	0	0	3.23e-06	0	0	0	0	2.7e-06	5.05e-06	0	1.62e-06	4.45e-06	0	0	7.02e-06	0	0	0	6.76e-06	3.54e-06	0	0	0	1.63e-06	0	0	6.06e-07	0	2.45e-06	1.78e-06	1.28e-06	1.01e-06	9.84e-07	2.63e-06	0	0	3.22e-06	3.71e-06	0	3.21e-06	0	0	0	1.84e-06	0	6.12e-06
K01474_N-methylhydantoinase_B	3.34e-06	0	5.1e-06	0	7.2e-06	0	3.77e-06	0	0	0	5.62e-06	0	0	4.81e-06	0	0	1.69e-05	0	0	6.68e-06	0	3.92e-06	0	7.81e-06	0	2.06e-06	2.33e-06	1.72e-05	8.06e-07	5.31e-06	1.56e-06	5.74e-07	0	1.08e-06	2.73e-06	2.82e-06	0	0	3.47e-06	4.33e-06	0	0	4.9e-06	1.01e-05	0	2.09e-06	0	0
K01476_arginase	0	5.79e-06	5.04e-06	0	1.57e-05	7.13e-06	0	5.67e-06	0	0	0	0	7.51e-06	0	2.1e-05	0	1.11e-05	0	0	6.51e-06	7.88e-06	8.68e-06	7.33e-06	0	0	7.7e-06	9.6e-06	0	5.47e-06	0	2.84e-06	1.08e-06	5.8e-06	7.17e-06	1.04e-05	5.45e-06	0	6.76e-06	7.56e-06	0	1.33e-05	0	0	0	1.54e-05	0	5.1e-06	6.7e-06
K01477_allantoicase	0	0	0	0	0	0	0	0	0	0	0	0	0	0	0	0	4.3e-06	0	0	0	0	0	0	0	0	0	0	0	0	0	0	5.64e-07	0	0	8.84e-07	0	0	0	0	6.58e-06	0	0	0	0	0	0	0	0
K01478_arginine_deiminase	2.61e-05	9.75e-05	6.51e-05	0.000206481	7.32e-05	0.000327304	2.06e-05	5.71e-05	0.000209293	9.82e-05	3.37e-05	4.7e-05	2.67e-05	3.7e-05	9.84e-05	9.71e-05	1.62e-05	3.82e-05	0.000103781	3.6e-05	2.26e-05	5.54e-05	0.000105178	1.79e-05	8.11e-05	6.04e-05	2.21e-05	2.54e-05	3.64e-05	2.18e-05	4.11e-05	9.47e-05	6.46e-05	3.22e-05	0.000125838	5.76e-05	5.33e-05	9.45e-05	3.8e-05	0.000117241	8.75e-05	9.73e-05	7.3e-05	4.46e-05	3.3e-05	2.71e-05	0.000112473	8.77e-05
K01479_formiminoglutamase	0	0	0	0	0	0	0	0	0	0	0	0	0	0	1.03e-05	0	0	0	0	0	0	0	0	0	0	0	0	0	0	0	0	5.78e-07	3.4e-06	0	0	0	0	0	0	9.36e-06	0	0	0	0	0	0	0	7.78e-06
K01480_agmatinase	8.49e-05	5.7e-05	0.000200023	0.000162901	0.000138765	6.09e-05	4.18e-05	8.41e-05	7.89e-05	7.29e-05	0.000107607	5.96e-05	8.1e-05	8.23e-05	6.96e-05	8.3e-05	5.55e-05	6.71e-05	0.000174534	4.46e-05	9.1e-05	5e-05	8.12e-05	8.65e-05	0.000113608	9.12e-05	6.52e-05	0.000231129	8.31e-05	7.37e-05	7.25e-05	0.000116592	9.74e-05	8.47e-05	5.9e-05	6.67e-05	8.01e-05	8.3e-05	0.000219296	4.21e-05	6.84e-05	0.000137053	5.12e-05	0.000159135	9.38e-05	9.95e-05	0.000128449	7.14e-05
K01481_protein-arginine_deiminase	0	0	0	0	0	0	0	0	0	0	0	0	0	0	4.85e-06	0	0	0	2.69e-06	0	0	0	0	3.53e-06	0	0	1.06e-06	0	0	0	0	0	0	0	0	0	0	0	0	0	0	3.26e-06	0	0	0	0	0	0
K01482_dimethylargininase	0	2.78e-05	0	0	2.67e-05	5.52e-06	0	0	8.28e-06	3.5e-05	0	8.1e-06	0	1.16e-05	0	0	6.26e-06	1.52e-05	0	8.26e-06	0	9.79e-06	0	0	9.89e-06	8.69e-06	1.09e-05	0	1.12e-05	0	8.65e-06	3.13e-05	1.05e-05	1.08e-05	4.17e-05	6.9e-06	6.48e-06	3.14e-05	3.43e-05	2.89e-05	0	0	2.32e-05	8.83e-06	2.16e-05	1.91e-05	3.88e-06	1.6e-05
K01483_ureidoglycolate_hydrolase	0	0	0	0	0	0	0	0	0	0	0	0	0	0	0	0	0	0	2.23e-05	0	0	0	0	0	0	0	0	0	0	0	5.23e-06	4.63e-06	0	0	1.99e-06	5.67e-06	0	0	0	0	0	0	0	0	0	0	0	0
K01484_succinylarginine_dihydrolase	0	0	3.65e-07	0	0	0	0	0	0	0	0	0	0	0	0	0	0	0	3.94e-06	0	5.21e-06	0	0	0	0	0	0	0	9.37e-07	0	3.12e-06	8.93e-07	0	0	0	0	6.65e-07	0	0	9.93e-07	0	0	0	0	0	0	0	0
K01485_cytosine_deaminase	4.88e-05	0.000168526	8.16e-05	2.61e-05	2.67e-05	0.000103533	2.19e-05	0.000147538	7.22e-05	0.000177188	0	0.000121274	3.87e-05	5.74e-05	3.1e-05	2.71e-05	7.81e-06	0.000274291	4.16e-05	0.000103774	0.00010792	8.14e-05	2.97e-05	3.47e-05	4.21e-05	9.36e-05	7.21e-05	0.000142943	9.02e-05	8.42e-05	5.69e-05	0.000187749	0.000128597	0.000231753	0.000171775	8.11e-05	1.19e-05	6.19e-05	2.11e-05	4.08e-05	6.44e-05	6.67e-05	0.000197595	8.48e-05	0.000176216	0.000238493	3.38e-05	0.000205372
K01486_adenine_deaminase	3.52e-06	1.13e-05	5.1e-06	1.16e-05	7.46e-06	9.84e-06	0	1.4e-05	1.8e-05	6.34e-06	2.41e-05	3.58e-06	5.43e-06	9.99e-06	0	0	2.9e-06	9.76e-06	9.16e-06	3.62e-06	1.17e-05	2.49e-05	1.07e-05	0	6.34e-06	1.16e-05	5.89e-06	8.86e-06	2.13e-06	1.53e-05	1.85e-05	1.08e-05	1.06e-05	2.37e-06	9.66e-06	6.01e-06	1.42e-05	2.67e-05	1.5e-05	1.71e-05	6.68e-06	2.65e-05	9.86e-06	3.69e-06	1.87e-05	8.36e-06	6.76e-06	1.04e-05
K01487_guanine_deaminase	9.98e-05	4.62e-05	0.000127968	0.000123047	8.5e-05	0.000108921	6.8e-05	0.000140555	4.74e-05	0.000112246	0.000197478	0.000185459	0.000297161	6.41e-05	8.59e-05	0.000317756	0.000130212	5.01e-05	0.000156004	0.000168601	0.000125487	0.000133339	0.000212035	0.0001943	0.000107609	0.000162294	0.000248362	6.54e-05	0.000194018	6.38e-05	9.79e-05	0.00019286	0.000188329	0.000126299	5.47e-05	0.000128772	0.000149113	0.000181565	0.000160456	8.02e-05	7.55e-05	0.000103245	0.000107772	7.63e-05	0.000152051	0.000116677	0.000110815	8.4e-05
K01488_adenosine_deaminase	4.69e-05	4.86e-05	4.7e-05	2.68e-05	4.38e-05	1.69e-05	1.94e-05	6.45e-05	2.66e-05	3.72e-05	7.79e-05	7.55e-05	6.07e-06	0.000107363	4.28e-05	0.000108692	1.34e-05	3.87e-05	4.2e-05	4.73e-05	2.67e-05	8.53e-05	8.24e-05	4.33e-05	3.53e-05	1.74e-05	2.06e-06	0	1.21e-05	5.16e-05	0.0001388	2.92e-05	1.01e-05	3.24e-05	4.35e-05	0.000101549	3.48e-05	1.21e-05	2.6e-05	4.51e-05	8.61e-05	3.61e-05	7.47e-06	3.2e-05	1.57e-05	3.4e-05	5.41e-05	6.01e-05
K01489_cytidine_deaminase	6.05e-05	5.34e-05	9.02e-05	0.000114673	6.67e-05	4.71e-05	0.000149816	7.37e-05	5.9e-05	8.85e-05	9.94e-05	0.000153426	3.82e-05	2.19e-05	0	0.000148918	0.000172514	2.08e-05	0.000178773	0.000155935	3.46e-05	0.000130276	9.22e-05	8.58e-05	4.65e-05	0.000104465	5.49e-05	0.000109393	3.69e-05	7.72e-05	8.42e-05	7.62e-05	0.000183804	6.54e-05	0.000106275	6.29e-05	0.00013873	0.000203565	0.000268365	0.000131128	0.000198135	4.6e-05	4.35e-05	0.000138486	0.0001113	2.65e-05	0.000122727	3e-05
K01490_AMP_deaminase	0	0	0	0	0	0	0	0	0	0	0	0	0	0	0	0	1.93e-06	0	0	0	0	0	2.54e-06	0	0	0	0	0	4.94e-07	0	0	0	0	0	4.61e-07	0	0	0	0	0	0	0	0	0	0	0	1.86e-06	0
K01491_methenyltetrahydrofolate_cyclohydrolase	0.00158623	0.000969596	0.00168589	0.00186644	0.00128597	0.00116227	0.00118961	0.00119966	0.00107287	0.00128893	0.00137596	0.00146235	0.00155011	0.00134267	0.00324272	0.00189022	0.00144525	0.00156222	0.0015698	0.000915863	0.000959833	0.00140373	0.00110007	0.00125443	0.000874901	0.00127583	0.00149046	0.00269106	0.00143454	0.00109436	0.0010797	0.00122488	0.00119889	0.00101459	0.000920607	0.00186494	0.00135168	0.000980797	0.00119921	0.00138429	0.00118674	0.00143257	0.00109988	0.000865732	0.00145475	0.00123703	0.000991058	0.000813175
K01492_phosphoribosylaminoimidazolecarboxamide_formyltransferase	0.000128522	8.7e-05	0.000164373	0.000340707	0.000212321	0.00024247	0.000129592	0.000133233	7.15e-05	0.000132923	0.000126752	0.000142248	0.000252541	0.000268771	0.000261201	0.000202419	0.000189803	0.000118229	0.000217203	0.000131285	0.00019549	0.000186969	0.000192723	0.000291258	0.000120538	0.000153892	0.000205685	0.000147774	0.000167658	0.000144826	0.000176719	0.000127189	0.000127767	0.000172227	0.00013617	0.000222874	0.000213689	0.00027315	0.000260365	0.000157645	0.000179965	0.000264977	6.51e-05	0.000169632	0.000168652	0.000126372	0.000199255	0.000103913
K01493_dCMP_deaminase	0.00234403	0.000785261	0.00236581	0.00287242	0.00239796	0.00221586	0.0028769	0.00158733	0.00193539	0.00164289	0.00271583	0.00147026	0.0015654	0.00366879	0.00223177	0.00317464	0.00265885	0.00210209	0.00234092	0.00210933	0.0018559	0.00237055	0.00264356	0.00318006	0.00146749	0.00138239	0.00166907	0.00189251	0.00154511	0.0015987	0.0033649	0.00137435	0.00168518	0.00154734	0.00195675	0.00294615	0.00300286	0.00194189	0.00192869	0.00196138	0.00193909	0.00227068	0.00124384	0.00201257	0.00178679	0.000990107	0.00228426	0.00168092
K01494_dCTP_deaminase	0.000519944	0.00157027	0.000602756	0.000200502	0.000639199	0.000817059	0.000342399	0.00123112	0.000999733	0.00122147	0.000692603	0.00100283	0.00056776	0.000143471	0.000178913	2.05e-05	8.99e-05	0.000818119	4.81e-05	0.000715687	0.000914623	0.000535911	0.00042708	0.00024723	0.000969475	0.000953118	0.000695869	0.00065268	0.00106	0.00107785	0.000462605	0.00110843	0.000758851	0.0011955	0.00107654	0.000317734	7.6e-05	0.000253788	5.91e-05	0.000642595	0.000302167	0.000510484	0.00150117	0.000403368	0.000840849	0.00157331	0.000365459	0.000826087
K01495_GTP_cyclohydrolase_I	0.00136161	0.00115401	0.0010763	0.00158963	0.00130064	0.00165236	0.00174416	0.00157637	0.00099981	0.00130788	0.0013645	0.00132369	0.00199721	0.00138694	0.00145188	0.00107393	0.00143246	0.00104921	0.00129808	0.00156525	0.00152028	0.00131641	0.0011249	0.00138238	0.00111988	0.00166654	0.00192207	0.00138866	0.00167005	0.00113237	0.00107521	0.0013713	0.00125865	0.00135357	0.0010818	0.00147066	0.00124348	0.00127109	0.00137962	0.00135514	0.000887786	0.0011023	0.00126118	0.00111041	0.00141818	0.00129091	0.00121717	0.00122029
K01496_phosphoribosyl-AMP_cyclohydrolase	0.000296791	0.00096121	0.000376613	0.000100765	0.000292501	0.00031248	7.73e-05	0.000547494	0.000478781	0.000582187	0.000301855	0.000568061	0.000202119	4.69e-05	0.000130175	0	6.73e-05	0.000395496	2.36e-05	0.000328648	0.000299053	0.000263542	7.87e-05	7.93e-05	0.000477909	0.000503238	0.000352932	0.000150726	0.000477209	0.000279832	0.000173528	0.000630065	0.000361684	0.000557902	0.000534052	0.000101047	4.6e-05	0.000180059	8.69e-05	0.000412363	9.88e-05	0.000101702	0.000683782	0.000151504	0.000325134	0.000747632	9.8e-05	0.0005813
K01497_GTP_cyclohydrolase_II	0.00161018	0.000779385	0.00123024	0.00169029	0.00149025	0.00135035	0.00160531	0.00149761	0.000850359	0.00123525	0.00126003	0.00132248	0.00270781	0.00184549	0.00202204	0.00176555	0.00223145	0.00109197	0.00221132	0.00158696	0.00135871	0.0010103	0.00180637	0.00189886	0.00108069	0.00176618	0.00242658	0.00125454	0.00196289	0.0011393	0.00132615	0.001398	0.0016252	0.00148432	0.00107777	0.00177195	0.00195488	0.00148974	0.00285464	0.00140615	0.00151272	0.0013257	0.000606922	0.00148201	0.00180416	0.00104879	0.00192537	0.00113697
K01498_diaminohydroxyphosphoribosylaminopyrimidine_deaminase	0	0	0	0	0	0	0	0	0	0	0	0	0	0	0	0	0	0	0	0	0	0	0	0	0	0	0	0	0	0	0	0	0	0	0	0	0	0	0	0	0	0	0	0	0	0	2.28e-06	0
K01499_methenyltetrahydromethanopterin_cyclohydrolase	0	0	0	0	0	0	6.62e-06	0	0	0	0	0	0	0	0	0	0	0	0	0	0	0	0	0	0	0	0	0	0	0	0	0	0	0	0	0	0	0	0	0	0	0	0	0	0	0	0	0
K01500	0	2.89e-06	1.59e-06	0	1.54e-05	9.65e-06	0	0	0	0	0	0	7.37e-06	0	0	1.57e-05	0	1.32e-05	1.2e-05	1.43e-05	1.03e-05	3.09e-06	2.89e-05	0	0	1.04e-06	0	0	0	0	9.42e-06	8.61e-06	0	0	1.86e-05	1.22e-05	0	0	1.49e-05	0	0	1.48e-05	0	0	1.51e-05	0	3.79e-06	0
K01501_nitrilase	0	4.13e-06	1.93e-05	0	1.5e-05	2.27e-06	1.38e-05	0	0	0	0	0	3.98e-06	9.9e-06	0	0	1.07e-05	6.4e-06	0	0	0	8.23e-06	1.4e-05	7.73e-06	0	0	2.57e-06	0	4.02e-06	0	4.54e-06	2.06e-06	1.72e-07	2.27e-06	1.1e-06	0	0	6.41e-06	0	3.29e-05	0	7.21e-06	0	7.42e-06	0	0	3.26e-06	0
K01502_aliphatic_nitrilase	0	0	0	0	0	0	0	0	0	0	0	0	0	0	0	0	0	0	5.15e-06	0	0	0	0	0	0	0	0	0	1.15e-06	0	8.19e-07	1.69e-06	2.65e-06	0	0	0	0	0	0	0	0	0	0	0	0	0	0	0
K01504_glucosamine-6-phosphate_isomerase	0	0	0	0	0	0	0	2.45e-06	0	0	0	0	0	0	0	0	0	0	0	0	0	0	0	0	0	0	0	0	0	0	0	0	0	0	0	0	0	0	0	0	0	0	0	0	0	0	0	0
K01505_1-aminocyclopropane-1-carboxylate_deaminase	0	0	4.4e-06	0	0	0	0	0	0	0	1.04e-05	0	0	0	0	0	4.91e-06	0	0	0	0	0	0	0	0	0	0	0	1.2e-06	8.74e-06	0	0	0	0	0	2.69e-06	0	0	0	0	1.19e-05	0	0	0	0	0	0	1.18e-06
K01506	2.53e-05	9.2e-06	1.75e-05	5.39e-05	4.54e-06	1.98e-05	3.38e-05	2.3e-05	8.42e-06	7.21e-06	6.91e-06	0	6.07e-05	1.8e-05	7.31e-05	1.56e-05	3.57e-05	0	5.26e-05	2.94e-05	1.83e-05	4.98e-06	2.97e-05	3.87e-05	2.28e-05	4.91e-05	6.52e-05	2.05e-05	4.01e-05	1.78e-05	1.87e-05	3.21e-05	3.41e-05	3.58e-05	1e-05	1.07e-05	9.99e-06	2.81e-05	5.26e-05	9.95e-06	2.36e-05	4.36e-06	1.18e-05	2.25e-05	3.11e-05	1.96e-05	3.21e-05	1.25e-05
K01507_inorganic_pyrophosphatase	0.000926631	0.00163411	0.00144289	0.00161532	0.0013921	0.00178687	0.000835153	0.00161533	0.00206575	0.00127562	0.00105869	0.00139312	0.000624723	0.000880605	0.00114361	0.00173405	0.00114541	0.00149089	0.00108654	0.0011507	0.00132101	0.0016327	0.00135412	0.00117379	0.00176884	0.000943028	0.000692022	0.00118326	0.00112636	0.00148296	0.00107645	0.00123385	0.00127167	0.00115972	0.00165804	0.00112046	0.00101993	0.00148804	0.000549543	0.00137802	0.00174849	0.00135054	0.00188836	0.000861626	0.00115785	0.00174905	0.00120035	0.00171387
K01509_adenosinetriphosphatase	4.14e-06	6.96e-08	6.87e-07	6.7e-08	3.67e-08	6.28e-07	9.22e-07	4.03e-08	2.74e-08	3.34e-08	1.33e-06	3.66e-08	1.77e-08	3.27e-07	7.81e-07	1.1e-06	1.45e-07	1.04e-07	1.08e-06	1.16e-07	1.26e-06	5.15e-08	5.23e-08	3.16e-06	8.74e-08	2.41e-07	4.97e-08	2.68e-08	2.33e-07	1.62e-08	2.89e-07	1.8e-07	8.31e-07	2.11e-07	5.72e-08	2.83e-06	4.19e-08	7.08e-07	2.99e-08	5.89e-07	5.33e-08	3.52e-08	4.23e-08	1.68e-07	4.77e-08	3.49e-08	1.55e-06	9.58e-07
K01510_apyrase	0	0	0	0	0	0	0	0	0	0	0	0	0	0	0	0	0	0	0	0	0	0	0	0	0	0	0	0	0	0	0	0	0	0	0	0	0	0	0	0	0	0	0	0	0	0	9.44e-07	0
K01511_ectonucleoside_triphosphate_diphosphohydrolase_5/6	0	0	0	0	0	0	0	2.67e-06	0	0	0	0	0	0	0	0	0	0	0	0	0	0	0	0	0	0	0	0	0	0	0	0	0	0	0	0	0	0	0	0	0	0	0	0	0	0	1.15e-06	0
K01512_acylphosphatase	4.64e-05	3.17e-05	4.62e-05	2.47e-05	2.56e-05	0	2.33e-05	5.43e-05	0	2.03e-05	0	6.62e-05	3.25e-05	3.3e-05	0	0	1.79e-05	4.27e-05	3.92e-05	0	2.05e-05	0	2.34e-05	0	3.79e-05	2.46e-05	4.48e-05	5.65e-05	0	0	1.26e-05	1.95e-05	2.83e-05	0	2.52e-05	1.84e-05	0	2.21e-05	6.24e-05	1.52e-05	0	4.14e-05	0	0.000106499	2.11e-05	0	1.09e-05	0
K01513_nucleotide_pyrophosphatase	0	0	0	0	0	0	0	0	0	0	0	4.74e-06	0	0	0	0	1.78e-06	0	0	0	0	0	0	0	0	0	0	0	0	0	0	0	0	0	0	0	0	0	0	0	0	0	0	0	0	0	0	0
K01514_exopolyphosphatase	5.65e-06	3.4e-06	4.78e-05	0	4.46e-06	0	3.29e-06	3.31e-06	0	0	0	0	6.47e-06	0	0	0	0	1.37e-05	0	1.52e-05	2.25e-05	4.96e-06	4.29e-06	4.75e-06	4.19e-07	0	4.38e-06	1.02e-05	4.46e-06	1.18e-05	1.28e-05	7.06e-06	2.97e-07	0	3.4e-06	1.68e-06	5.99e-06	0	0	9.63e-06	0	8.4e-06	0	1.01e-05	3.47e-06	0	3.75e-06	4.89e-06
K01515_ADP-ribose_pyrophosphatase	2.31e-05	3.19e-05	2.28e-05	1.22e-05	2.26e-05	1.18e-05	3.47e-05	3.35e-05	1.97e-05	3.04e-05	6.58e-05	3.19e-05	5.89e-05	0	3.37e-05	1.8e-05	6.85e-05	9.77e-05	3.9e-05	1.92e-05	3.31e-05	0	2.33e-05	2.69e-05	3.93e-05	3.81e-05	4.22e-05	5.41e-05	1.05e-05	1.68e-05	2.45e-05	3.1e-05	5.64e-05	4.85e-05	6.75e-05	1.38e-05	1.68e-05	1.1e-05	0.000120397	3.39e-05	0.000105832	1.01e-05	1.68e-05	0.000119935	7.42e-05	4.76e-05	3.54e-05	3.14e-05
K01516_nucleoside-triphosphatase	0.000445771	0.000437855	0.000258577	0.00012263	0.000287307	0.000273116	0.000144293	0.000377881	0.000332953	0.000463779	0.000197306	0.000373661	0.000806648	0.000151108	0.000331027	0.000203518	0.000506566	0.000339349	0.000486281	0.000407158	0.000556161	0.0004122	0.000278476	0.000301258	0.000341433	0.000694813	0.000628733	0.00052293	0.000557445	0.000516077	0.00024693	0.000465378	0.000523304	0.000523824	0.00026864	0.000432033	0.000327968	0.000299148	0.00050293	0.00039386	0.000435885	0.000231668	0.000451079	0.000580624	0.000473428	0.000446021	0.000389113	0.000343649
K01517_CDPglycerol_pyrophosphatase	0	0	0	0	0	0	0	0	0	0	0	0	0	0	0	0	0	0	0	0	0	6.84e-06	0	0	0	0	0	0	0	0	0	0	0	0	0	0	0	0	0	0	0	0	0	0	0	0	0	0
K01520_dUTP_pyrophosphatase	0.000664259	0.000955653	0.00108355	0.000870752	0.00136935	0.000900756	0.00101749	0.00109127	0.00074449	0.000763489	0.00113144	0.000751439	0.000864965	0.000859473	0.000934919	0.00097625	0.00103302	0.00104484	0.00087393	0.000852075	0.000990364	0.000735449	0.00101512	0.000946893	0.000683191	0.000839139	0.000876641	0.000821627	0.00102271	0.000933198	0.00117634	0.000793573	0.000777483	0.000898004	0.000869389	0.000973852	0.000943452	0.000902772	0.000482269	0.00100673	0.000654223	0.000917332	0.000666102	0.000704229	0.0010433	0.000990726	0.000910622	0.000980761
K01521_CDP-diacylglycerol_pyrophosphatase	0	2.92e-06	0	0	0	0	0	0	0	0	0	1.48e-05	0	0	0	0	0	0	5.66e-06	0	7.36e-06	0	0	0	0	0	0	0	0	0	8.5e-06	1.2e-06	0	0	0	0	0	0	0	8e-06	0	0	0	0	0	0	1.59e-06	0
K01523_phosphoribosyl-ATP_pyrophosphohydrolase	0.000191801	0.000613983	0.000175217	5.63e-05	0.00010476	0.000228381	2.28e-05	0.000321572	0.000266292	0.000277518	0.000208453	0.00036776	9.96e-05	0.000102778	0.000102768	8.4e-05	2.35e-05	0.000184137	6.1e-05	4.96e-05	0.000171807	0.000361454	0.000139761	0	0.00032506	0.000281399	0.000195047	0.000153016	0.000257274	0.000343977	9.17e-05	0.00027829	0.000203013	0.000377537	0.000256299	6.69e-05	4.27e-05	2.08e-05	3.03e-05	0.000247127	0.000160664	0.00017463	0.000402392	0.000158223	0.000194874	0.000290288	0.000118904	0.000357815
K01524_guanosine-5'-triphosphate,3'-diphosphate_pyrophosphatase	0	0	0	0	0	0	6.72e-07	0	0	0	0	0	0	0	0	0	0	0	0	4.24e-06	4.65e-06	0	0	0	0	0	0	0	4.09e-07	0	2.25e-06	5.61e-07	0	1.4e-06	3.35e-07	0	0	0	0	1.01e-05	0	0	0	0	2.25e-06	0	0	0
K01525_bis(5'-nucleosyl)-tetraphosphatase_(symmetrical)	7.76e-06	1.55e-06	5.39e-06	0	0	2.61e-06	0	0	0	0	0	0	0	0	1.22e-05	0	0	2.14e-05	1.26e-05	7.89e-06	0	0	7.96e-06	0	0	0	0	0	6.73e-06	0	1.51e-05	1.29e-06	0	0	2.23e-06	0	0	0	0	0	2.9e-05	8.05e-06	1.06e-05	8.29e-06	0	4.59e-06	0	0
K01527_nascent_polypeptide-associated_complex_subunit_beta	0	0	0	0	0	0	0	8.38e-06	0	0	0	0	0	0	3.29e-05	0	0	0	0	0	0	0	0	0	0	0	0	0	0	0	0	0	0	0	0	0	0	0	0	0	0	0	0	0	0	0	1.97e-06	0
K01528_dynamin_GTPase	0	0	1.58e-06	0	0	0	2.93e-06	0	0	0	0	0	0	0	1.15e-06	0	0	0	0	0	3.17e-06	2.9e-06	3.16e-06	0	0	0	0	0	0	0	0	2.32e-07	0	0	4.42e-07	0	0	2.49e-06	0	0	0	0	0	0	0	0	1.17e-06	0
K01529	2.06e-05	1.59e-05	1.31e-05	0.000108648	1.8e-05	1.57e-05	1.66e-05	1.49e-05	2.07e-05	4.83e-06	6.96e-06	9.86e-06	1.26e-06	5.43e-06	4.56e-05	1.72e-05	6.08e-06	3.45e-05	1.91e-05	2.07e-05	2e-05	5.76e-06	3.99e-05	7.45e-06	2.94e-05	7.71e-06	5.14e-06	5.6e-06	1.77e-06	2.14e-05	1.56e-05	1.57e-05	1.06e-05	7.61e-06	9e-06	4.84e-06	3.01e-05	9.35e-06	4.79e-06	1.97e-06	2.5e-05	2.32e-05	1.62e-05	7.42e-06	8.51e-06	8.17e-06	1.65e-05	3.78e-06
K01530_phospholipid-translocating_ATPase	0	0	1.09e-06	0	0	0	0	3.73e-06	0	0	0	3.45e-06	0	0	8.6e-06	0	0	0	0	0	0	0	1.64e-06	2.06e-06	1.05e-06	0	0	0	0	4.2e-06	0	4.09e-07	1.84e-06	1.16e-06	7.87e-07	7.79e-07	1.34e-06	1.48e-06	2.01e-06	0	3.63e-06	0	0	0	9.39e-07	0	3.13e-06	0
K01531_Mg2+-importing_ATPase	9.39e-06	7.93e-06	4.92e-06	4.95e-06	5.03e-06	3.16e-06	0	3.62e-06	2.32e-06	6.03e-06	1.55e-05	2.31e-06	1.2e-06	3.38e-06	3.67e-06	0	5.44e-06	4.45e-06	3.91e-06	4.67e-06	2.51e-05	2.8e-06	7.07e-06	0	7.11e-06	1.24e-06	2.3e-06	1.7e-05	3.18e-06	6.56e-06	7.03e-06	6.42e-06	1e-06	4.58e-06	3.35e-06	1.98e-06	5.57e-06	1.57e-05	2.42e-06	5.49e-06	1.75e-05	1.93e-05	6.55e-06	2.48e-06	0	2.7e-06	4.94e-06	4.69e-06
K01533_Cu2+-exporting_ATPase	0.000308032	0.000465528	0.000353079	0.00021956	0.000296248	0.000226697	0.000266016	0.000320688	0.0002763	0.000276529	0.00021631	0.000381847	0.000284811	0.000193799	0.000287842	0.000324785	0.000285238	0.000355799	0.000331982	0.000330668	0.000387655	0.000323961	0.000306249	0.000288143	0.000349408	0.000373945	0.000304003	0.000345341	0.000301344	0.000385038	0.000248142	0.000360897	0.000369074	0.000317447	0.000328311	0.000276108	0.000303923	0.000448635	0.00034871	0.000324729	0.00028126	0.000318362	0.000439879	0.000435959	0.000322177	0.000319564	0.000314574	0.000382536
K01534_Zn2+-exporting_ATPase	0.000288935	0.000212756	0.000411827	0.000358517	0.00034916	0.000317897	0.000374029	0.000223635	0.000318846	0.00036638	0.000371327	0.000398685	0.000268815	0.000372362	0.000376657	0.000649033	0.000428222	0.000454592	0.000544641	0.000391095	0.0003269	0.000477518	0.000342313	0.000484969	0.000374023	0.000292049	0.000280863	0.00037326	0.000264957	0.000293854	0.000433072	0.000294458	0.000309025	0.00027035	0.000345351	0.000426909	0.000671487	0.000521911	0.000452748	0.000331197	0.000446427	0.000477562	0.000362103	0.000498921	0.000287918	0.000196634	0.00041347	0.000363033
K01535_H+-transporting_ATPase	0	0	0	0	0	0	0	1.74e-06	0	0	0	0	0	0	3.54e-06	0	0	0	0	0	2.42e-06	0	2.19e-06	5.12e-06	1.35e-06	0	0	0	0	3.14e-06	0	1.98e-07	0	0	0	0	2.35e-06	0	0	0	0	2.32e-06	0	0	0	0	5.24e-07	0
[truncated: 7,843 more rows]
