# Supplementary material for: Social networks predict gut microbiome composition in wild baboons
Source: eLife. 2015 Mar 16;4:e05224. doi: 10.7554/eLife.05224 (PMC4379495; doi:10.7554/eLife.05224)
Supplement: Supplementary file 6. — Table listing the proportional representation of common phyla in each sample. Taxonomic abundances were inferred for all samples using MetaPhlAn 2.0. DOI: http://dx.doi.org/10.7554/eLife.05224.019 [file elife05224s006.xlsx]

## Sheet: Sheet1
Subject ID	Acidobacteria	Actinobacteria	Bacteroidetes	Deinococcus Thermus	Firmicutes	Proteobacteria	Spirochaetes	Tenericutes	Other Phyla	Unspecified	Archaea
M01	0.011	0.147	0.057	0.017	0.48	0.112	0.008	0.006	0.011	0.142	0.009
M02	0.003	0.104	0.05	0.017	0.524	0.094	0.011	0.027	0.019	0.143	0.009
M03	0.01	0.104	0.054	0.009	0.533	0.1	0.018	0.008	0.012	0.143	0.009
M04	0.011	0.124	0.056	0.01	0.462	0.128	0.01	0.031	0.017	0.142	0.01
M05	0.026	0.101	0.1	0.033	0.353	0.172	0.03	0.015	0.016	0.143	0.01
F01	0.014	0.086	0.093	0.032	0.359	0.199	0.03	0.016	0.019	0.143	0.009
F02	0.009	0.231	0.026	0.012	0.428	0.098	0.03	0.008	0.011	0.143	0.005
F03	0.017	0.083	0.074	0.022	0.401	0.131	0.085	0.02	0.017	0.143	0.007
F04	0.011	0.027	0.041	0.013	0.391	0.119	0.222	0.011	0.011	0.142	0.012
F05	0.014	0.079	0.085	0.024	0.356	0.147	0.091	0.031	0.021	0.142	0.01
F06	0.016	0.08	0.088	0.018	0.31	0.12	0.167	0.016	0.027	0.141	0.016
M06	0.013	0.032	0.082	0.017	0.382	0.119	0.18	0.01	0.015	0.143	0.008
M07	0.002	0.061	0.034	0.024	0.508	0.075	0.126	0.009	0.012	0.143	0.006
M08	0.005	0.022	0.029	0.005	0.709	0.067	0.004	0.006	0.006	0.144	0.003
M09	0.015	0.105	0.065	0.025	0.362	0.164	0.06	0.029	0.021	0.142	0.012
F07	0.014	0.067	0.098	0.018	0.441	0.17	0.009	0.012	0.015	0.142	0.012
F08	0.014	0.14	0.075	0.012	0.391	0.128	0.027	0.036	0.023	0.142	0.013
F09	0.023	0.168	0.101	0.012	0.341	0.132	0.012	0.041	0.012	0.141	0.016
F10	0.026	0.136	0.06	0.009	0.463	0.103	0.011	0.024	0.018	0.143	0.007
F11	0.019	0.063	0.102	0.033	0.474	0.115	0.016	0.015	0.013	0.143	0.006
F12	0.018	0.107	0.048	0.015	0.499	0.118	0.016	0.017	0.012	0.143	0.005
M10	0.013	0.048	0.057	0.012	0.442	0.152	0.063	0.036	0.027	0.143	0.007
M11	0.014	0.077	0.081	0.019	0.396	0.138	0.08	0.023	0.02	0.142	0.011
F13	0.01	0.13	0.111	0.011	0.399	0.147	0.012	0.007	0.015	0.143	0.015
M12	0.032	0.172	0.026	0.008	0.484	0.092	0.013	0.012	0.012	0.143	0.005
M13	0.011	0.059	0.043	0.01	0.591	0.108	0.007	0.011	0.013	0.144	0.003
F14	0.011	0.081	0.131	0.033	0.317	0.162	0.078	0.016	0.013	0.142	0.016
F15	0.006	0.043	0.09	0.016	0.306	0.191	0.145	0.029	0.021	0.143	0.011
F16	0.011	0.027	0.082	0.009	0.411	0.151	0.071	0.049	0.036	0.142	0.011
F17	0.008	0.034	0.093	0.011	0.38	0.168	0.098	0.025	0.022	0.142	0.018
M14	0.006	0.102	0.075	0.011	0.519	0.104	0.008	0.01	0.013	0.143	0.009
F18	0.021	0.118	0.07	0.042	0.331	0.143	0.087	0.019	0.018	0.143	0.007
F19	0.013	0.034	0.087	0.016	0.439	0.135	0.076	0.02	0.024	0.142	0.014
F20	0.014	0.11	0.097	0.033	0.3	0.136	0.126	0.016	0.016	0.144	0.007
F21	0.011	0.08	0.098	0.028	0.35	0.14	0.107	0.018	0.014	0.142	0.012
F22	0.032	0.083	0.084	0.019	0.323	0.136	0.122	0.03	0.021	0.143	0.009
F23	0.016	0.079	0.103	0.028	0.361	0.157	0.045	0.029	0.027	0.142	0.014
F24	0.013	0.043	0.091	0.012	0.313	0.154	0.168	0.021	0.025	0.141	0.017
F25	0.013	0.085	0.05	0.011	0.529	0.114	0.011	0.017	0.019	0.143	0.008
F26	0.006	0.186	0.039	0.009	0.478	0.108	0.011	0.006	0.009	0.143	0.005
M15	0.015	0.15	0.065	0.026	0.402	0.094	0.078	0.012	0.01	0.143	0.006
F27	0.004	0.136	0.061	0.007	0.48	0.121	0.009	0.011	0.015	0.143	0.012
F28	0.008	0.08	0.058	0.007	0.541	0.111	0.011	0.019	0.011	0.142	0.012
M16	0.018	0.073	0.09	0.032	0.429	0.133	0.032	0.021	0.017	0.142	0.012
F29	0.015	0.142	0.078	0.032	0.444	0.111	0.006	0.005	0.012	0.143	0.01
M17	0.021	0.125	0.062	0.029	0.4	0.144	0.033	0.017	0.019	0.143	0.007
F30	0.008	0.09	0.062	0.02	0.393	0.173	0.063	0.02	0.021	0.144	0.006
F31	0.02	0.053	0.105	0.011	0.354	0.123	0.148	0.018	0.015	0.142	0.012
Mean	0.014	0.094	0.073	0.018	0.423	0.13	0.06	0.019	0.017	0.143	0.01
SD	0.007	0.046	0.025	0.009	0.084	0.029	0.057	0.01	0.006	0.001	0.004
