# Supplementary material for: Social networks predict gut microbiome composition in wild baboons
Source: eLife. 2015 Mar 16;4:e05224. doi: 10.7554/eLife.05224 (PMC4379495; doi:10.7554/eLife.05224)
Supplement: Supplementary file 7. — Table listing the dietary composition during the microbiome sample collection period. DOI: http://dx.doi.org/10.7554/eLife.05224.020 [file elife05224s007.xlsx]

## Sheet: Sheet1
Food type	Observed % of diet in Mica’s group (and 95% confidence limit)	Observed % of diet in Viola’s group (and 95% confidence limit)	p
grass corms	50.1 (40.0 – 61.7)	51.6 (44.8 – 57.3)	0.57
grass seed heads	16.3 (10.0 – 26.7)	19.6 (13.5 – 22.9)	0.71
Acacia tortilis pods	14.3 (8.3 – 23.3)	16.2 (11.5 – 19.8)	0.62
fruits	7.9 (0 – 8.3)	2.2 (1.0 – 7.29)	0.05
leaves	4.2 (0 – 8.3)	4.5 (1.0 – 7.29)	0.56
gum	1.7 (0 – 6.67)	4.5 (1.0 – 5.21)	0.83
other	5.6 (0 – 6.67)	1.5 (1.0 – 5.21)	0.07
