# Supplementary material for: Social networks predict gut microbiome composition in wild baboons
Source: eLife. 2015 Mar 16;4:e05224. doi: 10.7554/eLife.05224 (PMC4379495; doi:10.7554/eLife.05224)
Supplement: Supplementary file 8. — Table listing statistical evidence for social structuring for the 327 most common bacterial species (prevalence >50% across 48 samples). Between group analyses were based on the linear mixed modeling approach implemented in the program GEMMA; q-values reflect a false discovery rate of 10%. Within-network analyses were based on Moran's I, as implemented in the function Moran.I in the R package ape; q-values reflect a false discovery rate of 10%. DOI: http://dx.doi.org/10.7554/eLife.05224.021 [file elife05224s008.xlsx]

## Sheet: Sheet1
	Between-group analyses based on mixed models				Within-network analyses based on spatial autocorrelation
Bacterial species	Beta	Beta SE	p	q	Moran's I	p	q
Achromobacter piechaudii	-0.531	0.295	0.0789	0.183	-0.303	0.995	0.405
Acidaminococcus unclassified	0.324	0.342	0.349	0.378	0.098	0.0928	0.137
Acidiphilium unclassified	-0.004	0.303	0.99	0.604	0.041	0.219	0.194
Acidovorax avenae	-0.084	0.315	0.792	0.542	0.024	0.273	0.219
Acinetobacter unclassified	0.063	0.301	0.834	0.556	-0.049	0.551	0.293
Actinobacillus unclassified	-0.311	0.312	0.325	0.361	0.082	0.127	0.158
Actinobaculum unclassified	0.846	0.35	0.0198	0.0815	0.198	0.0106	0.0708
Afipia unclassified	0.157	0.329	0.635	0.486	-0.079	0.663	0.328
Aggregatibacter unclassified	-0.77	0.34	0.0285	0.0911	0.085	0.114	0.151
Agromyces unclassified	0.002	0.346	0.997	0.604	0.005	0.319	0.231
Alicycliphilus unclassified	0.819	0.324	0.0153	0.0739	0.06	0.149	0.17
Alicyclobacillus unclassified	0.465	0.363	0.206	0.296	-0.042	0.527	0.29
Alistipes unclassified	-0.019	0.327	0.954	0.593	0.006	0.34	0.241
Alloprevotella unclassified	1.113	0.241	3.58e-05	0.00118	-0.081	0.688	0.334
Anaerococcus hydrogenalis	-0.36	0.321	0.268	0.336	-0.043	0.53	0.29
Anaerococcus prevotii	0.272	0.343	0.432	0.411	-0.163	0.91	0.386
Anaeromyxobacter dehalogenans	-0.233	0.288	0.423	0.411	-0.084	0.682	0.334
Anaerostipes unclassified	0.616	0.348	0.0841	0.188	-0.006	0.382	0.26
Anaerotruncus unclassified	-0.885	0.357	0.0173	0.0788	-0.055	0.574	0.301
Arcobacter butzleri	-0.282	0.307	0.365	0.384	0.112	0.0693	0.123
Arcobacter unclassified	-0.071	0.264	0.788	0.542	0.011	0.313	0.229
Azoarcus unclassified	-0.074	0.335	0.826	0.556	-0.172	0.915	0.386
Azospirillum lipoferum	0.225	0.258	0.388	0.398	-0.045	0.535	0.29
Azospirillum unclassified	-0.587	0.322	0.075	0.181	-0.101	0.74	0.347
Bacillus cereus thuringiensis	-0.368	0.29	0.211	0.298	-0.061	0.597	0.304
Bacteriovorax unclassified	-0.325	0.356	0.367	0.384	0.043	0.216	0.194
Bartonella unclassified	-1.232	0.235	4.46e-06	0.000727	-0.104	0.773	0.35
Bifidobacterium adolescentis	0.539	0.358	0.14	0.238	0.11	0.0411	0.102
Bifidobacterium animalis	0.748	0.327	0.0271	0.091	0.263	0.0014	0.0384
Bifidobacterium bifidum	0.55	0.334	0.107	0.209	0.334	0.000126	0.0168
Bifidobacterium breve	0.773	0.301	0.0137	0.0697	0.24	0.00306	0.0396
Bifidobacterium dentium	0.791	0.336	0.0233	0.0834	0.297	0.000385	0.0256
Bifidobacterium longum	0.589	0.336	0.0867	0.189	0.236	0.00327	0.0396
Blastomonas unclassified	0.018	0.295	0.953	0.593	-0.102	0.745	0.347
Blattabacterium unclassified	-0.027	0.26	0.917	0.587	0.048	0.211	0.194
Bordetella bronchiseptica parapertussis	0.182	0.283	0.524	0.455	-0.012	0.407	0.265
Bordetella pertussis	0.301	0.362	0.41	0.404	-0.019	0.43	0.27
Bordetella unclassified	-0.134	0.377	0.724	0.525	0.004	0.349	0.244
Borrelia afzelii	-0.017	0.31	0.956	0.593	-0.057	0.595	0.304
Borrelia burgdorferi	0.001	0.288	0.997	0.604	0.096	0.0321	0.0895
Brachybacterium unclassified	0.298	0.319	0.357	0.383	-0.032	0.484	0.282
Brachyspira hampsonii	-0.042	0.293	0.886	0.581	0.093	0.101	0.143
Brachyspira hyodysenteriae	-0.257	0.299	0.394	0.402	0.218	0.00695	0.0503
Brachyspira pilosicoli	0.211	0.286	0.465	0.428	0.082	0.123	0.156
Brachyspira unclassified	1.075	0.269	0.000244	0.00448	-0.127	0.832	0.365
Brevibacterium unclassified	0.168	0.309	0.589	0.472	0.146	0.0297	0.0895
Brevundimonas diminuta	0.686	0.241	0.00682	0.0455	0.113	0.0668	0.12
Brevundimonas unclassified	-0.482	0.382	0.213	0.299	0.041	0.228	0.195
Buchnera aphidicola	-0.199	0.342	0.563	0.466	0.174	0.0208	0.0827
Burkholderia cenocepacia	-0.354	0.301	0.246	0.325	0.131	0.0476	0.105
Burkholderia mallei	0.075	0.28	0.79	0.542	0.125	0.0556	0.109
Burkholderia pseudomallei	0.146	0.292	0.619	0.476	-0.067	0.62	0.312
Burkholderia thailandensis	-0.321	0.294	0.282	0.338	-0.038	0.51	0.29
Burkholderia unclassified	-0.408	0.308	0.191	0.284	0.037	0.228	0.195
Butyrivibrio fibrisolvens	0.364	0.373	0.335	0.367	-0.198	0.942	0.394
Butyrivibrio unclassified	0.512	0.279	0.0732	0.179	0.048	0.185	0.188
Caldicellulosiruptor unclassified	0.232	0.381	0.546	0.462	0.017	0.303	0.223
Campylobacter coli	-0.003	0.309	0.993	0.604	0.098	0.0964	0.139
Campylobacter fetus	0.286	0.295	0.339	0.368	-0.123	0.814	0.359
Campylobacter jejuni	-0.051	0.304	0.867	0.57	-0.047	0.543	0.291
Campylobacter upsaliensis	0.008	0.3	0.978	0.603	0.018	0.3	0.223
Campylobacter ureolyticus	-0.404	0.353	0.258	0.334	0.224	0.00556	0.0463
Candidatus Arthromitus unclassified	-0.194	0.297	0.518	0.453	0.158	0.0236	0.0827
Candidatus Blochmannia unclassified	-0.176	0.29	0.547	0.462	0.044	0.211	0.194
Candidatus Liberibacter americanus	-0.241	0.302	0.429	0.411	0.04	0.234	0.198
Candidatus Liberibacter unclassified	0.994	0.327	0.00398	0.039	0.147	0.0315	0.0895
Candidatus Pelagibacter ubique	-0.678	0.231	0.00531	0.0404	0.071	0.141	0.166
Candidatus Phytoplasma australiense	-0.28	0.333	0.405	0.403	0.131	0.0519	0.105
Candidatus Phytoplasma unclassified	0.151	0.3	0.617	0.476	-0.088	0.697	0.334
Candidatus Portiera aleyrodidarum	-0.67	0.302	0.0315	0.0975	0.151	0.0273	0.0895
Candidatus Sulcia muelleri	-0.413	0.28	0.148	0.244	0.174	0.0197	0.0827
Candidatus Zinderia insecticola	-0.181	0.278	0.518	0.453	0.135	0.042	0.102
Capnocytophaga unclassified	0.435	0.299	0.153	0.244	0.088	0.114	0.151
Caulobacter unclassified	0.324	0.277	0.248	0.325	-0.044	0.536	0.29
Caulobacter vibrioides	0.2	0.254	0.437	0.411	-0.104	0.753	0.348
Cellulomonas unclassified	0.033	0.304	0.914	0.587	-0.12	0.82	0.36
Cellulophaga unclassified	-0.304	0.369	0.415	0.407	0.017	0.303	0.223
Cellvibrio unclassified	0.17	0.294	0.565	0.466	0.044	0.205	0.194
Chlamydophila unclassified	-0.461	0.296	0.126	0.225	-0.014	0.414	0.265
Chlorobaculum unclassified	0.758	0.334	0.0282	0.0911	0.038	0.22	0.194
Chlorobium phaeobacteroides	0.652	0.369	0.0847	0.188	0.036	0.221	0.194
Chryseobacterium unclassified	0.094	0.295	0.752	0.537	-0.041	0.52	0.29
Citromicrobium unclassified	0.173	0.262	0.511	0.453	0.089	0.115	0.151
Clavibacter michiganensis	-0.058	0.276	0.835	0.556	0.05	0.2	0.194
Clostridium acetobutylicum	0.149	0.346	0.669	0.498	0.062	0.175	0.183
Clostridium beijerinckii	0.359	0.326	0.277	0.338	0.133	0.0494	0.105
Clostridium bifermentans	-0.212	0.357	0.556	0.466	0.041	0.223	0.194
Clostridium butyricum	-0.535	0.296	0.0775	0.183	0.077	0.0959	0.139
Clostridium carboxidivorans	-0.181	0.334	0.59	0.472	-0.007	0.386	0.26
Clostridium cellulovorans	0.574	0.36	0.118	0.213	0.08	0.132	0.162
Clostridium difficile	-0.553	0.326	0.0963	0.199	-0.005	0.378	0.258
Clostridium hathewayi	0.798	0.267	0.00465	0.0396	-0.08	0.667	0.328
Clostridium kluyveri	0.442	0.298	0.145	0.242	-0.137	0.841	0.366
Clostridium pasteurianum	-0.451	0.296	0.135	0.234	0.132	0.0482	0.105
Clostridium perfringens	-0.352	0.357	0.33	0.365	0.165	0.0242	0.0827
Clostridium saccharoperbutylacetonicum	-0.201	0.309	0.519	0.453	-0.016	0.414	0.265
Clostridium sordellii	-0.741	0.288	0.0135	0.0697	0.143	0.0412	0.102
Clostridium sporogenes	-0.092	0.333	0.784	0.542	0.013	0.297	0.223
Clostridium symbiosum	1.152	0.344	0.0017	0.021	0.019	0.291	0.223
Clostridium tyrobutyricum	-0.324	0.384	0.404	0.403	0.02	0.293	0.223
Collinsella unclassified	1.12	0.243	3.56e-05	0.00118	0.22	0.00247	0.0396
Comamonas unclassified	0.502	0.289	0.0896	0.192	-0.115	0.786	0.353
Coprobacillus unclassified	0.691	0.281	0.0179	0.0788	-0.072	0.637	0.319
Crenarchaeota noname unclassified	-0.8	0.282	0.00689	0.0455	0.089	0.11	0.15
Cupriavidus taiwanensis	0.448	0.273	0.108	0.209	0.181	0.0184	0.0827
Curtobacterium unclassified	-0.012	0.294	0.969	0.599	0.072	0.147	0.17
Cyanobacterium unclassified	-1.066	0.3	0.000923	0.0122	-0.029	0.472	0.277
Cyanobium unclassified	0.661	0.273	0.0196	0.0815	-0.045	0.534	0.29
Cytophaga unclassified	0.018	0.288	0.952	0.593	0.046	0.214	0.194
Deinococcus unclassified	-0.726	0.279	0.0127	0.0677	-0.02	0.441	0.274
Desulfobulbus sp oral taxon 41	1.01	0.253	0.000249	0.00448	-0.041	0.519	0.29
Desulfovibrio desulfuricans	-0.579	0.353	0.108	0.209	0.186	0.0133	0.0772
Dialister micraerophilus	-0.699	0.276	0.0151	0.0739	0.236	0.00412	0.0436
Dictyoglomus unclassified	-0.022	0.297	0.941	0.593	0.159	0.0296	0.0895
Dorea formicigenerans	0.2	0.348	0.569	0.466	-0.056	0.584	0.304
Dorea unclassified	-0.35	0.298	0.247	0.325	0.06	0.173	0.183
Dysgonomonas unclassified	0.28	0.302	0.36	0.383	0.104	0.0845	0.132
Echinicola unclassified	0.722	0.31	0.0245	0.0835	-0.046	0.538	0.29
Eggerthella unclassified	0.665	0.28	0.022	0.0834	-0.106	0.761	0.349
Ehrlichia unclassified	-0.266	0.299	0.378	0.394	0.169	0.0172	0.0827
Elizabethkingia anophelis	0.588	0.359	0.109	0.209	0.116	0.0715	0.124
Erysipelothrix unclassified	0.326	0.298	0.28	0.338	-0.004	0.371	0.255
Escherichia unclassified	-0.756	0.308	0.0183	0.0789	0.25	0.00188	0.0384
Eubacteriaceae noname unclassified	-0.691	0.291	0.0221	0.0834	0.099	0.0918	0.137
Eubacterium rectale	0.418	0.285	0.15	0.244	-0.073	0.704	0.335
Eubacterium siraeum	-0.647	0.277	0.0239	0.0834	-0.083	0.687	0.334
Exiguobacterium unclassified	-0.349	0.32	0.281	0.338	-0.215	0.96	0.395
Facklamia unclassified	0.487	0.26	0.068	0.17	0.25	0.00202	0.0384
Faecalibacterium prausnitzii	1.71	0.343	1.07e-05	0.000727	0.111	0.0567	0.109
Fervidobacterium unclassified	-0.596	0.302	0.0551	0.155	0.044	0.215	0.194
Finegoldia magna	-0.071	0.302	0.816	0.555	0.11	0.0769	0.128
Francisella novicida	-0.493	0.328	0.14	0.238	0.049	0.198	0.194
Fusobacterium gonidiaformans	0.025	0.302	0.934	0.591	0.192	0.0131	0.0772
Fusobacterium necrophorum	0.462	0.298	0.128	0.225	0.148	0.0337	0.0915
Fusobacterium nucleatum	-0.647	0.33	0.0569	0.156	0.16	0.0242	0.0827
Fusobacterium periodonticum	-0.131	0.307	0.673	0.499	0.077	0.136	0.163
Fusobacterium ulcerans	-0.406	0.3	0.182	0.279	0.064	0.161	0.18
Gardnerella vaginalis	0.872	0.318	0.00878	0.0531	0.117	0.0647	0.118
Gemella haemolysans	-0.186	0.354	0.602	0.474	0.13	0.0509	0.105
Gemella unclassified	-0.105	0.209	0.618	0.476	-0.027	0.458	0.277
Geobacillus kaustophilus	0.042	0.3	0.89	0.582	-0.149	0.887	0.379
Geobacillus unclassified	0.574	0.343	0.102	0.206	-0.008	0.394	0.262
Gillisia unclassified	-0.556	0.296	0.067	0.17	0.02	0.288	0.223
Gloeobacter unclassified	0.531	0.348	0.134	0.234	-0.027	0.467	0.277
Gluconacetobacter unclassified	-0.592	0.353	0.101	0.205	0.115	0.0456	0.105
Gordonia terrae	0.625	0.314	0.053	0.152	0.084	0.118	0.151
Granulicatella unclassified	0.159	0.278	0.57	0.466	-0.009	0.399	0.264
Granulicella unclassified	-0.498	0.33	0.139	0.238	0.094	0.0919	0.137
Halobacterium unclassified	0.149	0.292	0.612	0.476	-0.001	0.365	0.252
Halobiforma unclassified	0.247	0.322	0.446	0.413	0.035	0.244	0.203
Halococcus unclassified	0.21	0.247	0.4	0.403	0.061	0.173	0.183
Halomonas unclassified	0.265	0.372	0.48	0.433	-0.148	0.866	0.372
Halorubrum unclassified	0.427	0.293	0.153	0.244	-0.061	0.598	0.304
Helicobacter canadensis	-0.038	0.304	0.901	0.583	-0.04	0.516	0.29
Herbaspirillum unclassified	0.566	0.242	0.0238	0.0834	-0.118	0.787	0.353
Hippea unclassified	0.126	0.368	0.735	0.531	-0.125	0.809	0.358
Hirschia unclassified	0.573	0.301	0.0633	0.167	-0.154	0.876	0.375
Hymenobacter unclassified	0.264	0.302	0.386	0.398	0.013	0.299	0.223
Hyphomicrobium unclassified	-0.077	0.363	0.833	0.556	0.171	0.0224	0.0827
Kingella unclassified	0.263	0.302	0.388	0.398	0.022	0.285	0.223
Klebsiella unclassified	0.07	0.304	0.819	0.555	-0.039	0.512	0.29
Kocuria rhizophila	0.36	0.342	0.299	0.34	0.06	0.17	0.183
Kocuria unclassified	-0.372	0.298	0.22	0.304	-0.138	0.853	0.37
Kribbella unclassified	0.278	0.357	0.44	0.411	0.098	0.0967	0.139
Lachnoanaerobaculum saburreum	0.406	0.379	0.29	0.34	-0.148	0.865	0.372
Lactobacillus amylovorus	0.273	0.259	0.298	0.34	-0.016	0.412	0.265
Lactobacillus ruminis	-0.474	0.388	0.228	0.313	-0.142	0.865	0.372
Leifsonia unclassified	0.686	0.34	0.0501	0.148	-0.017	0.425	0.27
Leptotrichia wadei	-0.826	0.273	0.00414	0.039	0.104	0.0627	0.118
Leucobacter unclassified	0.797	0.268	0.0048	0.0396	0.061	0.172	0.183
Leuconostoc unclassified	-0.289	0.297	0.336	0.367	-0.1	0.768	0.35
Listeria unclassified	0.162	0.293	0.583	0.472	-0.072	0.642	0.32
Lysinibacillus sphaericus	0.222	0.31	0.477	0.433	-0.118	0.795	0.354
Marinobacter unclassified	0.416	0.289	0.157	0.249	0.075	0.139	0.166
Massilia unclassified	0.092	0.291	0.754	0.537	0.041	0.227	0.195
Megamonas unclassified	0.094	0.354	0.793	0.542	0.062	0.155	0.175
Megasphaera unclassified	1.051	0.243	8.82e-05	0.00227	-0.028	0.471	0.277
Meiothermus unclassified	0.43	0.332	0.203	0.296	-0.033	0.488	0.283
Mesoplasma florum	-0.39	0.294	0.192	0.284	0.055	0.182	0.186
Mesorhizobium loti	0.368	0.311	0.243	0.325	0.102	0.092	0.137
Mesorhizobium unclassified	-0.245	0.34	0.475	0.433	-0.018	0.429	0.27
Methanobrevibacter smithii	0.098	0.365	0.79	0.542	0.08	0.134	0.162
Methanobrevibacter unclassified	0.219	0.273	0.426	0.411	0.228	0.00425	0.0436
Methanocaldococcus villosus	-0.152	0.346	0.662	0.497	0.131	0.0529	0.105
Methanococcus maripaludis	-0.095	0.305	0.758	0.537	-0.079	0.665	0.328
Methanothermococcus unclassified	-0.738	0.299	0.0177	0.0788	0.039	0.214	0.194
Methylosinus unclassified	-0.106	0.291	0.716	0.523	-0.026	0.459	0.277
Methyloversatilis unclassified	0.67	0.286	0.0237	0.0834	0.101	0.0743	0.127
Microbulbifer unclassified	-0.497	0.37	0.186	0.283	0.019	0.285	0.223
Micrococcus luteus	0.052	0.257	0.84	0.558	0.009	0.332	0.239
Micromonospora unclassified	0.037	0.283	0.898	0.583	-0.197	0.946	0.394
Mitsuokella unclassified	0.176	0.354	0.62	0.476	0.23	0.00486	0.0462
Mobiluncus unclassified	0.189	0.358	0.6	0.474	0.179	0.0173	0.0827
Mycoplasma agalactiae	-0.33	0.29	0.262	0.334	0.054	0.191	0.193
Mycoplasma bovis	-0.667	0.285	0.024	0.0834	0.124	0.0573	0.109
Mycoplasma canis	-0.35	0.333	0.298	0.34	0.169	0.0198	0.0827
Mycoplasma capricolum	-0.497	0.312	0.119	0.213	0.039	0.169	0.183
Mycoplasma fermentans	-0.315	0.3	0.299	0.34	0.139	0.0435	0.104
Mycoplasma gallisepticum	-0.226	0.29	0.44	0.411	0.158	0.0295	0.0895
Mycoplasma genitalium	0.324	0.286	0.264	0.334	0.133	0.0525	0.105
Mycoplasma hominis	-0.361	0.334	0.286	0.339	0.158	0.0285	0.0895
Mycoplasma hyopneumoniae	-0.186	0.305	0.546	0.462	0.1	0.0777	0.128
Mycoplasma hyorhinis	-0.43	0.289	0.143	0.241	0.125	0.052	0.105
Mycoplasma leachii	-0.112	0.298	0.708	0.519	0.049	0.164	0.182
Mycoplasma mycoides	-0.568	0.329	0.0919	0.193	0.149	0.0322	0.0895
Mycoplasma putrefaciens	-0.304	0.357	0.399	0.403	0.166	0.0238	0.0827
Mycoplasma suis	0.408	0.344	0.242	0.325	0.118	0.0645	0.118
Mycoplasma synoviae	-0.527	0.299	0.0856	0.188	0.146	0.037	0.0986
Myroides unclassified	0.226	0.289	0.438	0.411	0.006	0.342	0.241
Natrialba unclassified	0.545	0.296	0.0727	0.179	-0.233	0.974	0.399
Natrinema unclassified	0.547	0.304	0.0786	0.183	0.105	0.0797	0.128
Natronorubrum unclassified	0.48	0.345	0.171	0.264	-0.205	0.955	0.395
Neisseria unclassified	-0.742	0.272	0.00923	0.0537	-0.198	0.949	0.394
Niabella unclassified	0.361	0.302	0.239	0.323	-0.04	0.516	0.29
Nitratireductor unclassified	-0.341	0.3	0.262	0.334	0.027	0.26	0.211
Nitrosospira unclassified	-0.031	0.305	0.92	0.587	-0.012	0.41	0.265
Nocardioides unclassified	0.166	0.316	0.601	0.474	0.031	0.248	0.204
Oceanicola unclassified	-0.135	0.302	0.658	0.497	-0.087	0.69	0.334
Odoribacter unclassified	0.221	0.283	0.439	0.411	-0.05	0.558	0.294
Olsenella unclassified	1.173	0.249	2.67e-05	0.00118	0.139	0.0378	0.0987
Oribacterium sp oral taxon 78	0.087	0.291	0.765	0.539	-0.118	0.787	0.353
Orientia tsutsugamushi	0.183	0.302	0.547	0.462	-0.102	0.746	0.347
Oscillibacter unclassified	-0.499	0.303	0.107	0.209	-0.152	0.917	0.386
Oxalobacter formigenes	-0.149	0.322	0.645	0.491	0.057	0.177	0.184
Parabacteroides unclassified	0.314	0.298	0.298	0.34	-0.034	0.492	0.284
Paracoccus denitrificans	-0.031	0.279	0.911	0.587	0.035	0.246	0.204
Paraprevotella unclassified	0.527	0.327	0.115	0.213	0.046	0.199	0.194
Parvimonas unclassified	-0.191	0.379	0.616	0.476	0.191	0.0121	0.077
Pasteurella unclassified	-0.739	0.263	0.00742	0.0474	-0.002	0.366	0.252
Pediococcus unclassified	0.374	0.299	0.218	0.303	-0.032	0.483	0.282
Pedobacter unclassified	-0.424	0.331	0.206	0.296	0.131	0.0474	0.105
Peptoniphilus lacrimalis	-0.192	0.307	0.535	0.462	0.007	0.333	0.239
Peptostreptococcaceae noname unclassified	0.483	0.297	0.111	0.211	-0.006	0.385	0.26
Peptostreptococcus unclassified	0.354	0.321	0.276	0.338	0.048	0.198	0.194
Polaribacter unclassified	0.018	0.318	0.956	0.593	0.089	0.116	0.151
Prevotella amnii	0.819	0.284	0.00612	0.0449	0.256	0.00165	0.0384
Prevotella bivia	1.073	0.272	0.000291	0.0048	-0.067	0.621	0.312
Prevotella buccae	0.846	0.297	0.00672	0.0455	-0.047	0.546	0.291
Prevotella dentalis	0.956	0.324	0.00509	0.0403	-0.079	0.664	0.328
Prevotella maculosa	0.622	0.316	0.0554	0.155	-0.039	0.511	0.29
Prevotella micans	0.621	0.346	0.0794	0.183	-0.109	0.763	0.349
Prevotella oralis	0.625	0.36	0.0902	0.192	0.044	0.219	0.194
Pseudomonas alcaligenes	0.221	0.313	0.484	0.435	-0.093	0.713	0.338
Pseudomonas unclassified	0.329	0.299	0.278	0.338	0.085	0.108	0.148
Pseudonocardia unclassified	0.601	0.283	0.0394	0.12	-0.014	0.411	0.265
Pseudoxanthomonas unclassified	0.318	0.301	0.297	0.34	-0.006	0.388	0.26
Pusillimonas unclassified	0.462	0.326	0.163	0.256	0.08	0.127	0.158
Ralstonia solanacearum	0.1	0.297	0.738	0.531	-0.026	0.462	0.277
Ralstonia unclassified	0.446	0.317	0.167	0.26	-0.059	0.594	0.304
Rhodanobacter unclassified	0.169	0.292	0.565	0.466	-0.101	0.74	0.347
Rhodobacter sphaeroides	0.275	0.356	0.445	0.413	-0.061	0.598	0.304
Rhodococcus opacus	0.281	0.307	0.366	0.384	-0.065	0.611	0.309
Rhodopirellula unclassified	0.697	0.338	0.0452	0.136	0.049	0.193	0.193
Rhodopseudomonas palustris	-0.082	0.285	0.775	0.542	0.022	0.289	0.223
Rhodospirillum unclassified	-0.153	0.356	0.669	0.498	0.044	0.206	0.194
Rickettsia bellii	-0.064	0.332	0.849	0.562	0.095	0.0805	0.128
Rickettsia prowazekii	-0.29	0.285	0.314	0.351	0.178	0.0194	0.0827
Rickettsia typhi	-0.576	0.326	0.0844	0.188	-0.022	0.447	0.274
Riemerella unclassified	-0.994	0.332	0.00453	0.0396	0.158	0.0242	0.0827
Roseburia intestinalis	0.255	0.305	0.407	0.403	0.018	0.295	0.223
Roseburia unclassified	0.033	0.265	0.902	0.583	0.034	0.239	0.2
Roseomonas unclassified	0.157	0.299	0.603	0.474	-0.131	0.837	0.365
Rothia unclassified	0.482	0.282	0.094	0.196	0.169	0.0226	0.0827
Rubrivivax unclassified	-0.237	0.325	0.471	0.431	-0.04	0.518	0.29
Ruminococcus albus	0.112	0.369	0.762	0.539	-0.112	0.772	0.35
Ruminococcus champanellensis	-0.765	0.284	0.00999	0.0558	-0.041	0.523	0.29
Ruminococcus flavefaciens	0.174	0.287	0.548	0.462	0.072	0.15	0.17
Ruminococcus gnavus	0.706	0.258	0.00885	0.0531	-0.027	0.467	0.277
Ruminococcus lactaris	0.225	0.285	0.434	0.411	-0.098	0.733	0.346
Ruminococcus obeum	0.069	0.326	0.834	0.556	-0.043	0.527	0.29
Ruminococcus torques	-0.119	0.293	0.688	0.507	-0.084	0.694	0.334
Saccharomonospora unclassified	0.816	0.264	0.00353	0.0389	-0.047	0.543	0.291
Salinicoccus unclassified	-0.033	0.351	0.926	0.588	-0.021	0.444	0.274
Salinispora pacifica	0.293	0.285	0.31	0.349	-0.09	0.698	0.334
Sandarakinorhabdus unclassified	-0.024	0.258	0.927	0.588	0.038	0.235	0.198
Scardovia unclassified	0.682	0.287	0.022	0.0834	-0.059	0.597	0.304
Scardovia wiggsiae	1.017	0.28	0.000745	0.0113	0.084	0.117	0.151
Segniliparus unclassified	0.12	0.338	0.724	0.525	-0.107	0.76	0.349
Serinicoccus unclassified	0.33	0.305	0.285	0.339	-0.054	0.576	0.301
Shewanella unclassified	-0.502	0.263	0.0632	0.167	0.002	0.35	0.244
Slackia unclassified	1.044	0.29	0.000824	0.0117	0.259	0.00182	0.0384
Sorangium cellulosum	0.317	0.263	0.235	0.32	0.019	0.299	0.223
Sphaerochaeta unclassified	-0.769	0.339	0.0285	0.0911	-0.018	0.425	0.27
Sphingobacterium unclassified	-0.395	0.35	0.265	0.334	0.178	0.0192	0.0827
Sphingobium unclassified	0.002	0.322	0.995	0.604	-0.161	0.895	0.381
Sphingomonas wittichii	-0.1	0.337	0.768	0.539	0.092	0.106	0.147
Sphingopyxis unclassified	0.081	0.307	0.794	0.542	-0.026	0.46	0.277
Spiribacter unclassified	0.461	0.316	0.152	0.244	-0.021	0.44	0.274
Spiroplasma melliferum	-0.171	0.382	0.657	0.497	0.185	0.0164	0.0827
Spiroplasma unclassified	-0.095	0.289	0.743	0.533	0.097	0.0807	0.128
Sporolactobacillus unclassified	0.342	0.256	0.189	0.284	-0.106	0.753	0.348
Stenotrophomonas maltophilia	0.579	0.3	0.0602	0.163	-0.198	0.946	0.394
Streptococcus constellatus	0.192	0.291	0.513	0.453	0.011	0.302	0.223
Streptococcus cristatus	0.152	0.347	0.663	0.497	-0.008	0.341	0.241
Streptococcus tigurinus	-0.052	0.292	0.86	0.567	0.04	0.222	0.194
Streptomyces albus	-0.18	0.305	0.559	0.466	0.056	0.178	0.184
Subdoligranulum unclassified	-0.65	0.343	0.0645	0.168	-0.027	0.467	0.277
Sulfurimonas gotlandica	0.209	0.297	0.486	0.435	0.046	0.204	0.194
Sulfurimonas unclassified	-0.35	0.273	0.206	0.296	0.092	0.106	0.147
Sutterella wadsworthensis	1.064	0.254	0.000136	0.003	-0.212	0.959	0.395
Taylorella unclassified	0.283	0.272	0.304	0.344	0.041	0.219	0.194
Terriglobus unclassified	0.764	0.284	0.0102	0.0558	-0.194	0.938	0.394
Thauera unclassified	0.002	0.308	0.995	0.604	-0.256	0.985	0.402
Thermaerobacter unclassified	0.465	0.291	0.118	0.213	0.154	0.0321	0.0895
Thermanaerovibrio unclassified	0.165	0.302	0.588	0.472	0.033	0.251	0.205
Thermoanaerobacter ethanolicus	-0.212	0.346	0.543	0.462	0.214	0.00645	0.0503
Thermococcus unclassified	-0.153	0.38	0.689	0.507	0.226	0.00536	0.0463
Thermodesulfatator unclassified	-0.392	0.352	0.271	0.337	0.071	0.142	0.166
Thermodesulfobacterium unclassified	-0.599	0.252	0.0222	0.0834	0.088	0.0896	0.137
Thermosipho africanus	-0.323	0.347	0.358	0.383	0.141	0.0413	0.102
Thermosipho unclassified	0.153	0.28	0.588	0.472	-0.116	0.79	0.353
Thermus unclassified	0.396	0.297	0.189	0.284	-0.022	0.447	0.274
Thioalkalivibrio unclassified	-0.414	0.357	0.253	0.329	0.017	0.301	0.223
Thiobacillus denitrificans	-0.158	0.295	0.594	0.474	-0.024	0.454	0.277
Thiomonas unclassified	0.551	0.343	0.116	0.213	0.06	0.134	0.162
Treponema denticola	-0.695	0.279	0.0166	0.0782	0.01	0.32	0.231
Treponema primitia	-0.593	0.296	0.0517	0.15	-0.089	0.7	0.334
Treponema socranskii	-1.062	0.246	9.18e-05	0.00227	-0.01	0.403	0.265
Treponema succinifaciens	-1.608	0.323	1.1e-05	0.000727	0.248	0.00276	0.0396
Tsukamurella unclassified	0.445	0.278	0.117	0.213	-0.121	0.798	0.354
Turicella otitidis	0.368	0.289	0.21	0.298	-0.051	0.559	0.294
Ureaplasma parvum	-0.204	0.301	0.501	0.447	0.008	0.268	0.216
Ureaplasma urealyticum	-0.268	0.32	0.406	0.403	0.109	0.0702	0.123
Variovorax unclassified	-0.661	0.35	0.0656	0.169	0.061	0.165	0.182
Veillonella unclassified	-1.096	0.361	0.00407	0.039	0.123	0.0515	0.105
Verminephrobacter unclassified	0.765	0.24	0.00262	0.0305	0.212	0.00717	0.0503
Weissella unclassified	0.669	0.298	0.03	0.0942	0.102	0.0809	0.128
