# Supplementary figures and images for: Social networks predict gut microbiome composition in wild baboons
Source: eLife journal article supplement (doi:10.7554/elife.05224), 2015-03-16

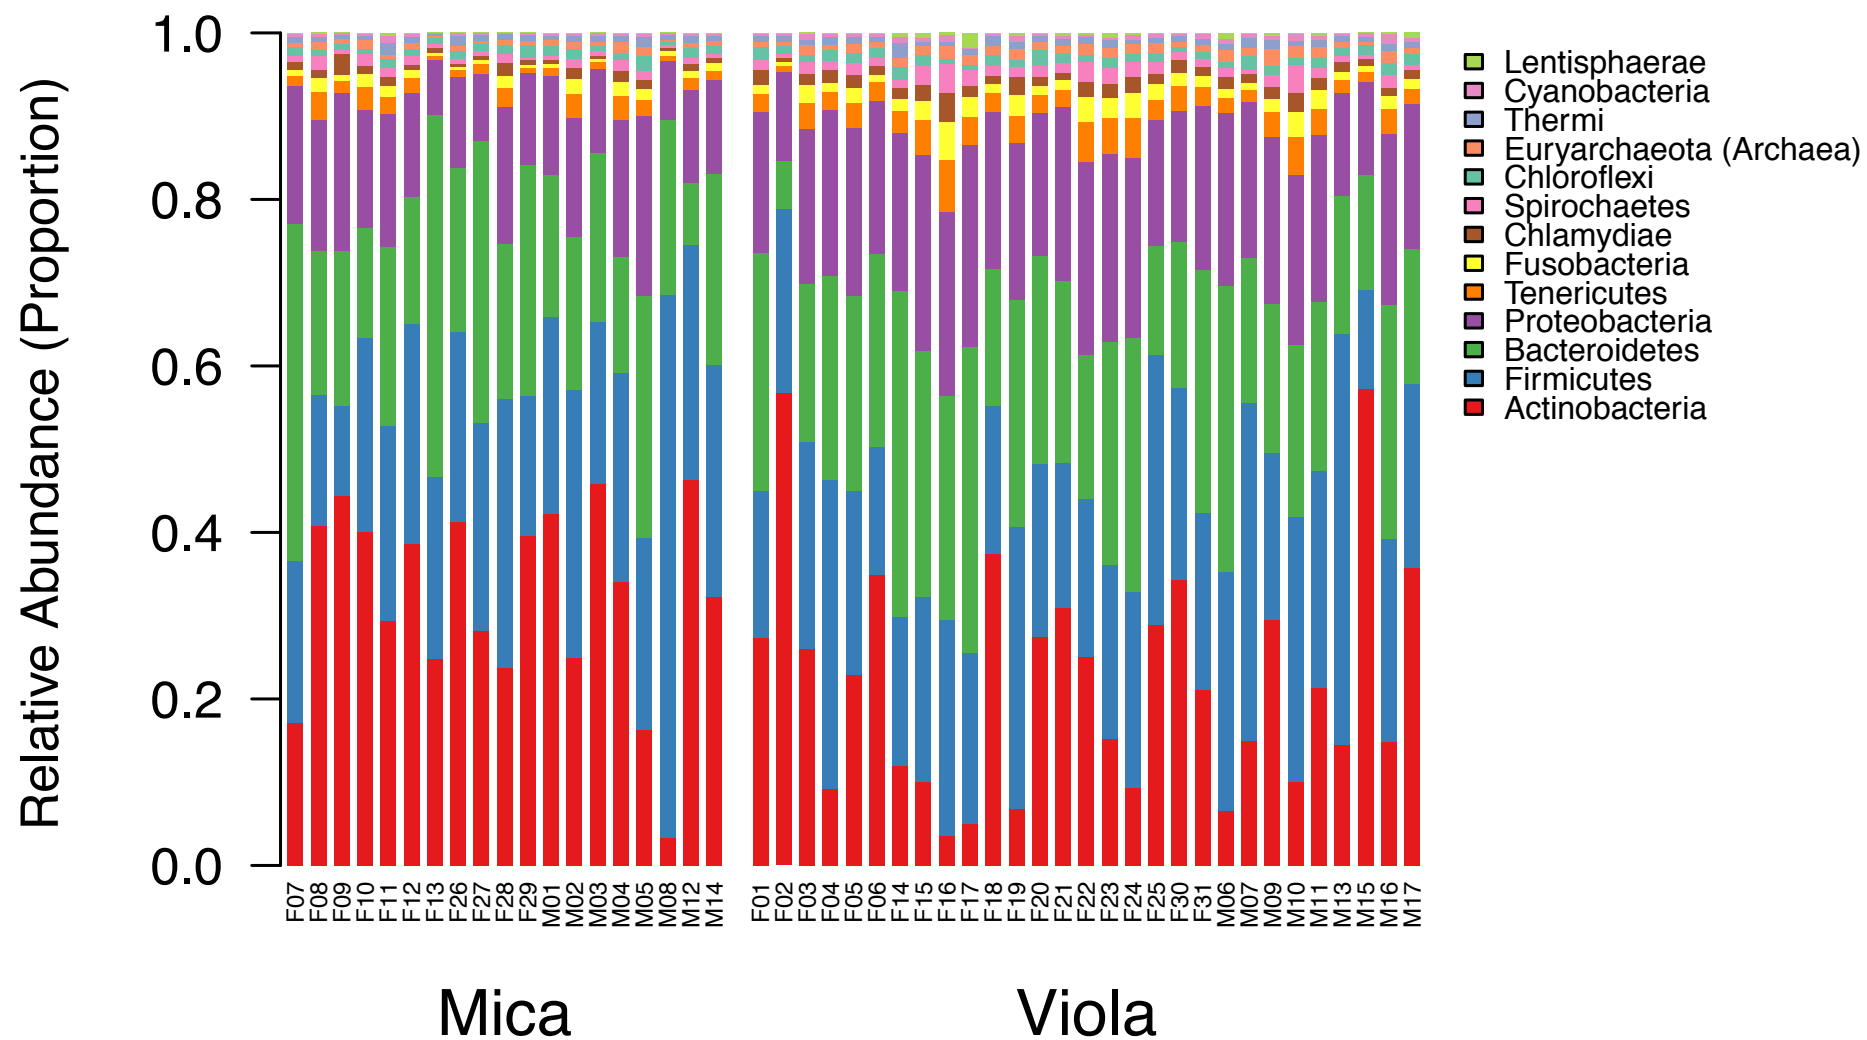

Supplement: supp [file elife_poa_e05224_Figure_1_figure_supplement_1.pdf › elife_poa_e05224_Figure_1_figure_supplement_1.pdf]

## KEGG Pathways

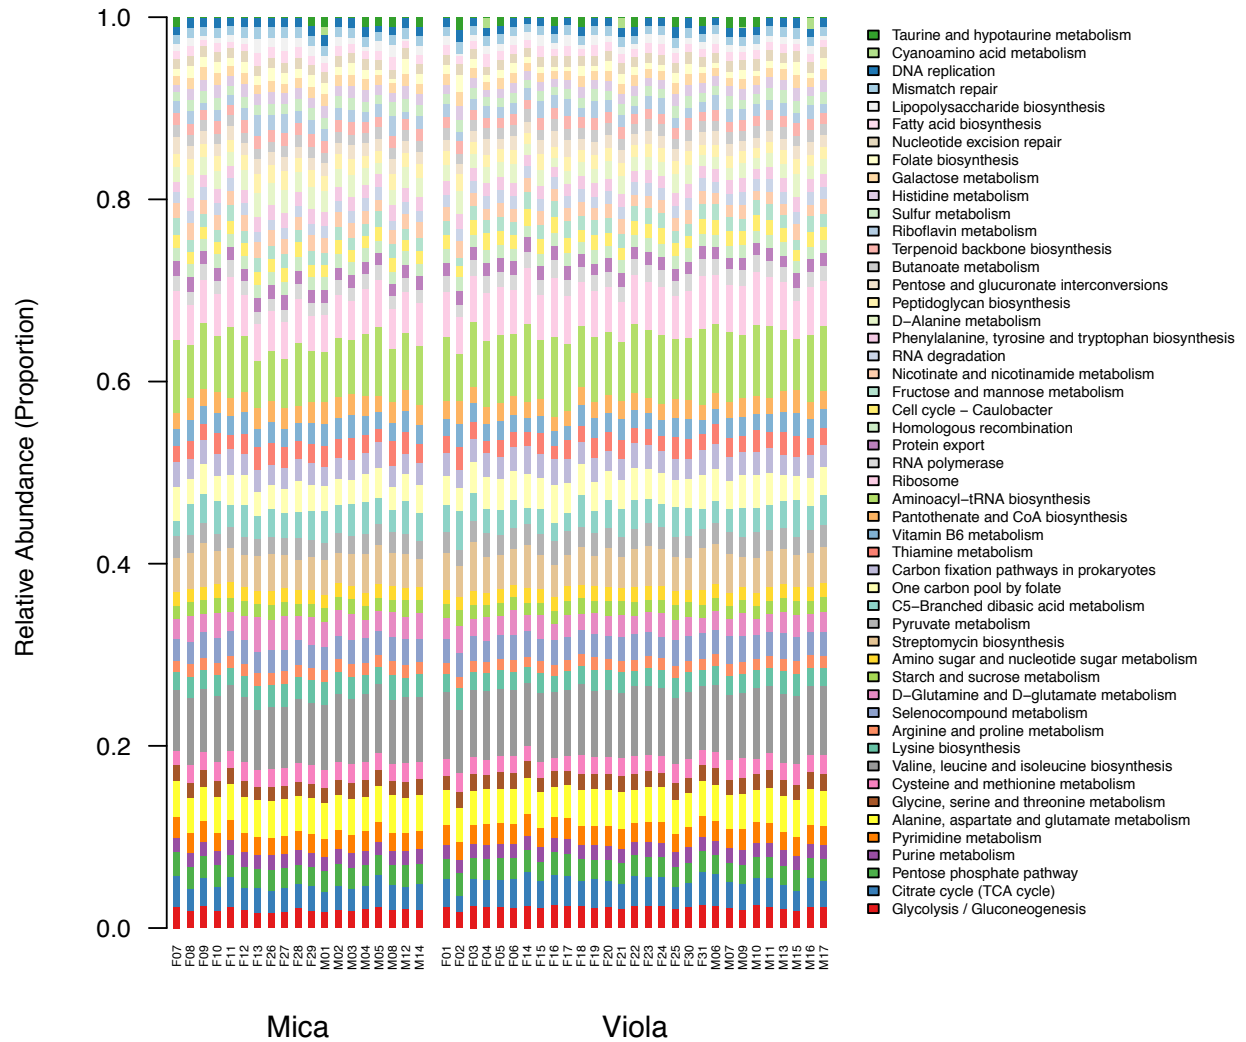

Supplement: supp [file elife_poa_e05224_Figure_1_figure_supplement_2.pdf › elife_poa_e05224_Figure_1_figure_supplement_2.pdf]

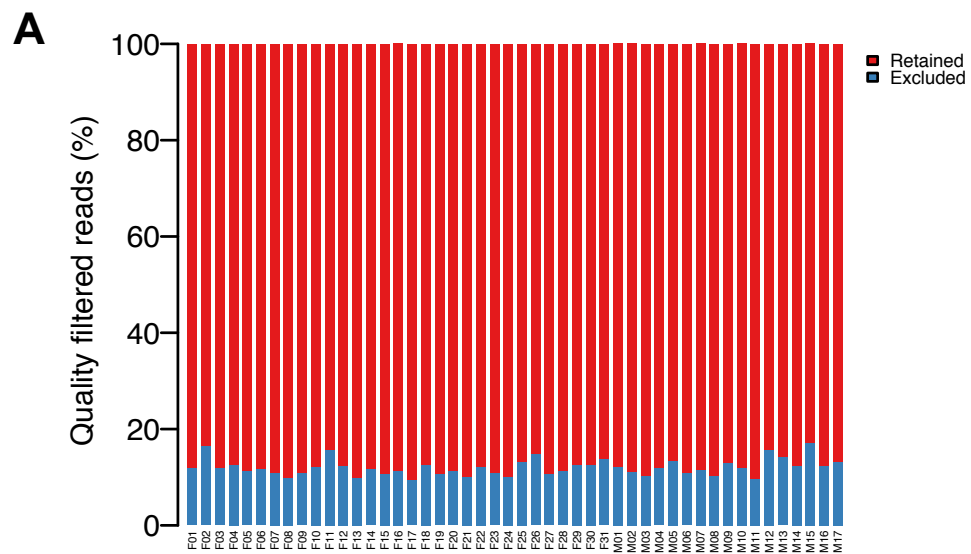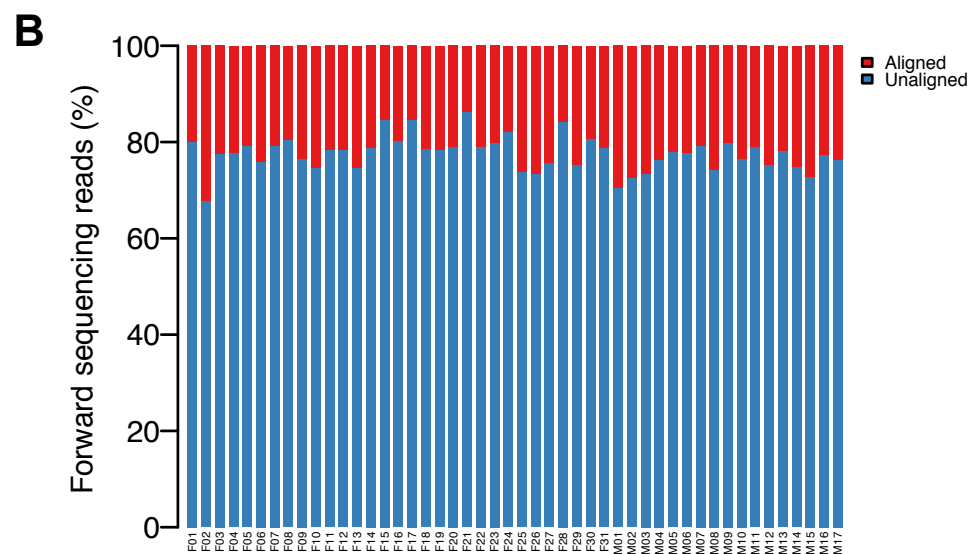

Supplement: supp [file elife_poa_e05224_Figure_1_figure_supplement_4.pdf › elife_poa_e05224_Figure_1_figure_supplement_4.pdf]

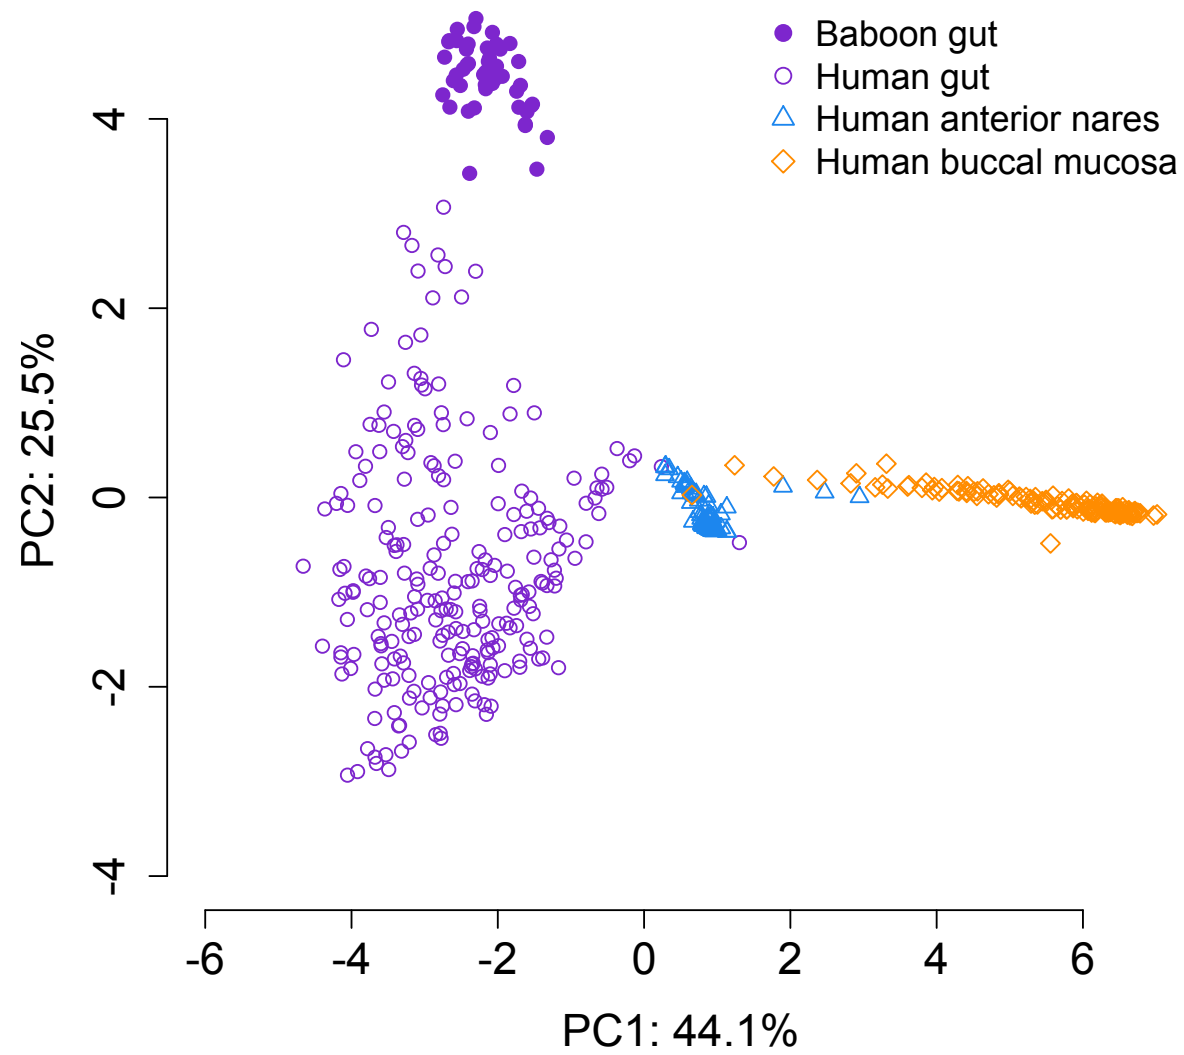

Supplement: supp [file elife_poa_e05224_Figure_1_figure_supplement_5.pdf › elife_poa_e05224_Figure_1_figure_supplement_5.pdf]

A

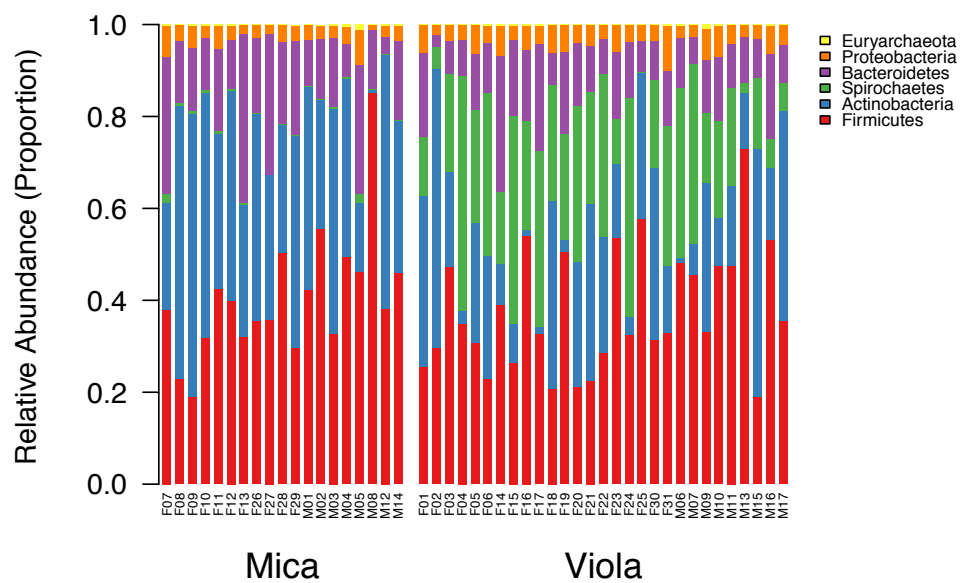

B

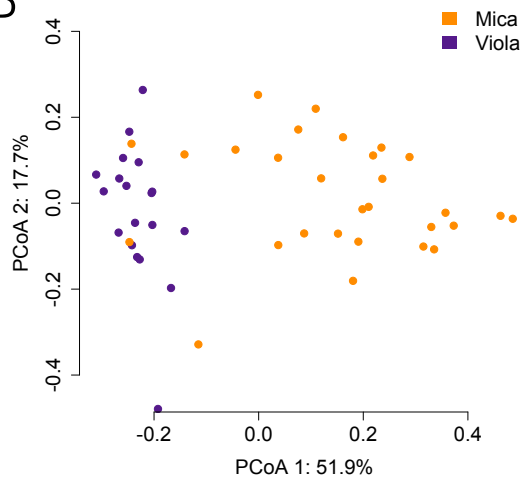

C

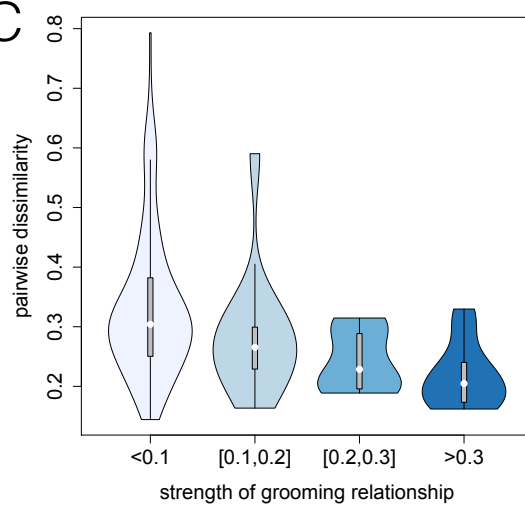

Supplement: supp [file elife_poa_e05224_Figure_2_figure_supplement_1.pdf › elife_poa_e05224_Figure_2_figure_supplement_1.pdf]

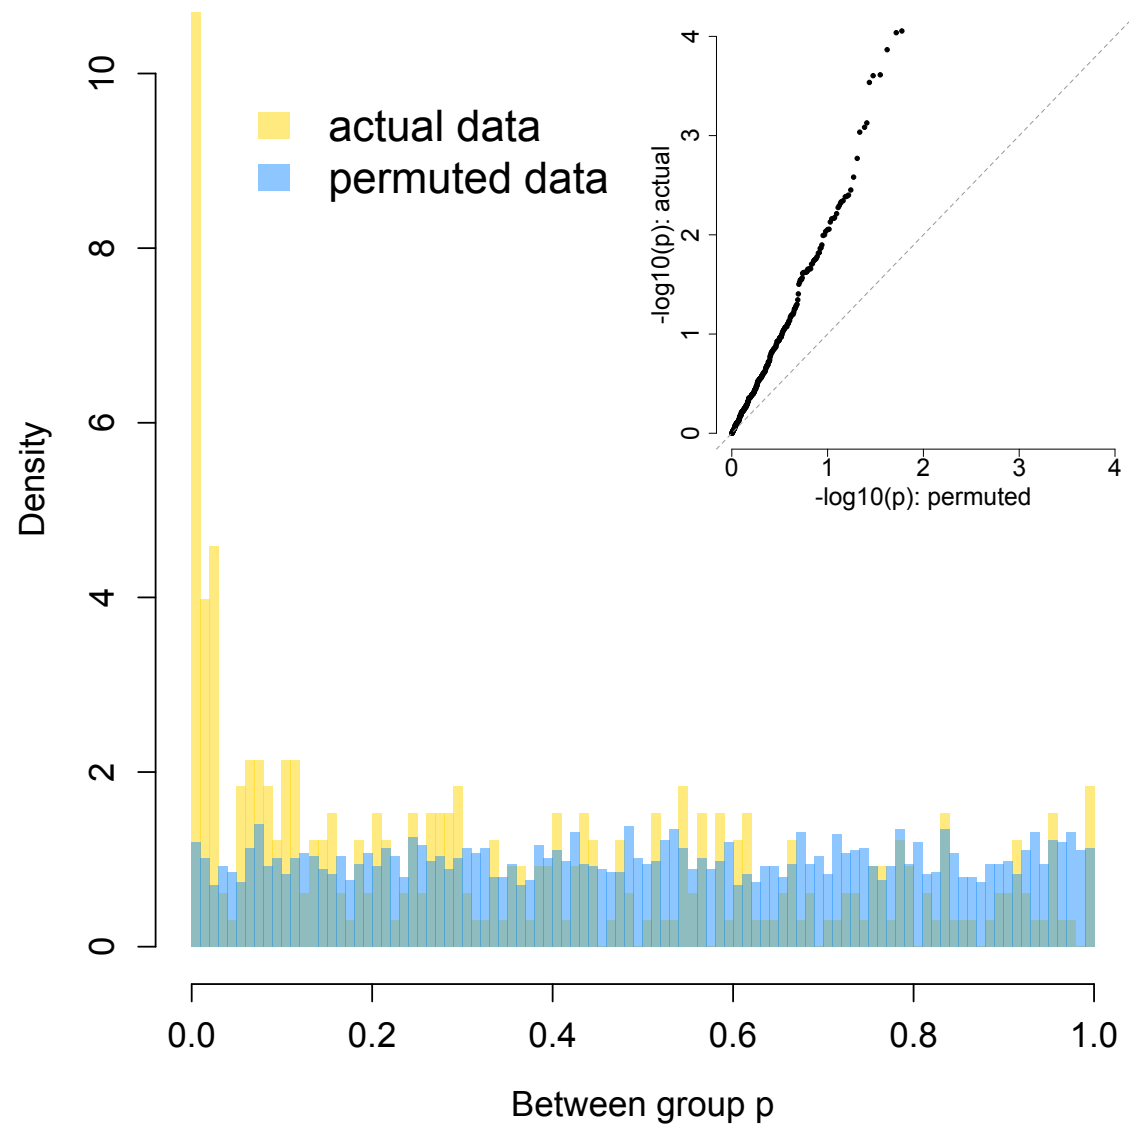

Supplement: supp [file elife_poa_e05224_Figure_3_figure_supplement_1.pdf › elife_poa_e05224_Figure_3_figure_supplement_1.pdf]

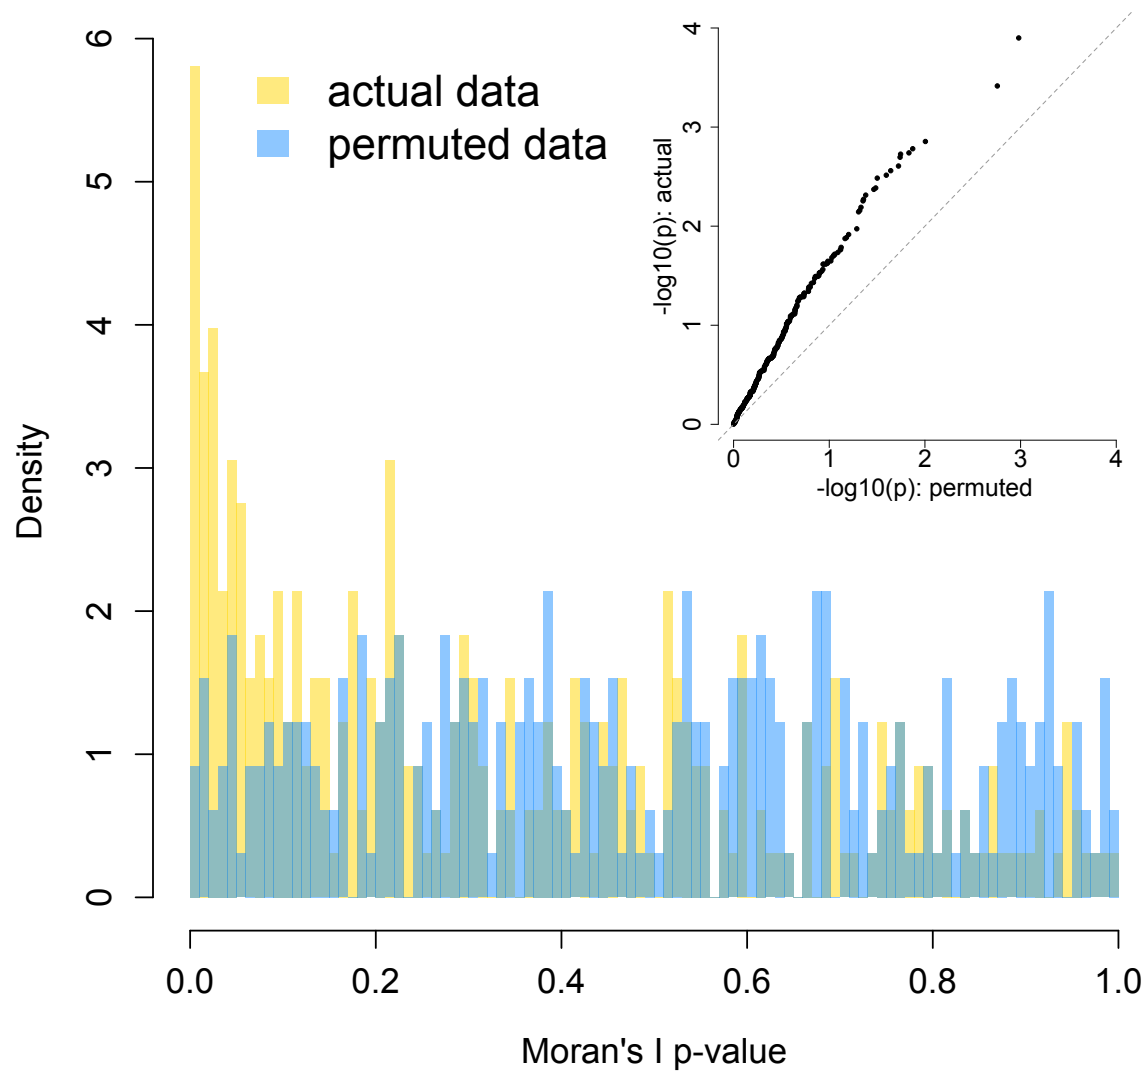

Supplement: supp [file elife_poa_e05224_Figure_3_figure_supplement_2.pdf › elife_poa_e05224_Figure_3_figure_supplement_2.pdf]
